# Supplementary material
Source: PubMed Central journal article supplement (PMC9032462)
Supplement: NIHMS1798292-supplement-Supporting_Information.pdf [file NIHMS1798292-supplement-Supporting_Information.pdf]

# Supporting Information

## Metalloradical Activation of In Situ-Generated $\alpha$ - Alkynyldiazomethanes for Asymmetric Radical Cyclopropanation of Alkenes

Jing Ke, Wan-Chen Cindy Lee, Xiaoxu Wang, Yong Wang, Xin Wen,  
and X. Peter Zhang\*

\*Department of Chemistry, Merkert Chemistry Center, Boston College

Chestnut Hill, Massachusetts 02467, United States

Corresponding author Email: peter.zhang@bc.edu

## Table of Contents

|                                                                                                                                                 |      |
|-------------------------------------------------------------------------------------------------------------------------------------------------|------|
| 1. General Considerations .....                                                                                                                 | S3   |
| 2. Figure S1: Selected Examples of Bioactive Compounds Containing Alkynyl Cyclopropanes.....                                                    | S4   |
| 3. Scheme S1. Solvent and Base Effect on Radical Cyclopropanation .....                                                                         | S5   |
| 4. Synthesis and Characterization of <i>N</i> -Sulfonyl Hydrazones .....                                                                        | S6   |
| 4.1. Experimental Procedure for Preparation of <i>N</i> -2,4,6-Triisopropylbenzenesulfonyl Hydrazones .....                                     | S6   |
| 4.2. Characterization of <i>N</i> -2,4,6-Triisopropylbenzenesulfonyl Hydrazones .....                                                           | S6   |
| 5. Synthesis and Characterization of Alkynyl Cyclopropanes .....                                                                                | S9   |
| 5.1. Experimental Procedure for [Co(Por)]-Catalyzed Asymmetric Cyclopropanation.....                                                            | S9   |
| 5.2. Characterization of Alkynyl Cyclopropane Products.....                                                                                     | S9   |
| 6. Mechanistic Studies of Stepwise Radical Mechanism.....                                                                                       | S19  |
| 6.1. Characterization of $\alpha$ -Co(III)-Propargyl Radical and $\gamma$ -Co(III)-Allenyl Radical Intermediates by EPR.....                    | S19  |
| 6.2. TEMPO Trapping Experiments .....                                                                                                           | S21  |
| 7. Further Transformations of Alkynyl-Substituted Cyclopropanes .....                                                                           | S23  |
| 8. X-Ray Crystallography.....                                                                                                                   | S27  |
| 9. DFT Calculations .....                                                                                                                       | S30  |
| 9.1. Scheme S2: Calculated Energy Diagram for [Co(P6)]-Catalyzed Radical Cyclopropanation of Styrene (2a) with Alkynyl Diazomethane (1a') ..... | S30  |
| 9.2. Scheme S3: Optimized Structure Models, NCI Plot and Spin Density Representations of Intermediates and Transition States .....              | S31  |
| 10. References .....                                                                                                                            | S109 |
| 11. NMR/HPLC Spectral Data.....                                                                                                                 | S110 |

## 1. General Considerations

All cyclopropanation reactions were performed in anhydrous solvents under N<sub>2</sub> atmosphere in an oven-dried glassware following standard Schlenk techniques. Gas tight syringes were used to transfer liquid reagents and solvents in catalytic reactions. Solvent was freshly distilled/degassed prior to use unless otherwise noted. Thin layer chromatography was performed on Merck TLC plates (silica gel 60 F254). Flash column chromatography was performed with ICN silica gel (60 Å, 230-400 mesh, 32-63 μm). <sup>1</sup>H NMR spectra were acquired using Varian INOVA 400 (400 MHz), Bruker 500 (500 MHz), or Varian INOVA 600 (600 MHz) spectrometer. Chemical shifts were internally referenced to residual solvent peak (CHCl<sub>3</sub> δ = 7.26 ppm). Data were reported as follows: chemical shift (ppm), integration, multiplicity (s = singlet, d = doublet, t = triplet, q = quartet, p = pentet, hept = heptet, m = multiplet), and coupling constants *J* (Hz). <sup>13</sup>C NMR spectra were acquired using Bruker 500 (126 MHz), or INOVA 600 (151 MHz) spectrometer with complete proton decoupling. Chemical shifts were reported in ppm with residual solvent peak (CDCl<sub>3</sub> δ = 77.16 ppm) as the internal standard. <sup>19</sup>F NMR spectrum was acquired using Varian INOVA 600 (564 MHz) spectrometer. Infrared spectra were measured with a Nicolet Avatar 320 spectrometer with a Smart Miracle accessory. Optical rotations were measured on a Rudolph Research Analytical AUTOPOL® IV digital polarimeter. HPLC measurements were carried out on a Shimadzu HPLC system with Chiralcel OD-H, IA, IB, IC, ID, and IE columns. High-resolution mass spectrometry (DART and ESI) was performed at the Mass Spectrometry Facility, Boston College, Chestnut Hill, MA. The X-ray diffraction data were collected using Bruker-AXS SMART-APEXII CCD diffractometer. All reagents were purchased either from Aldrich, Alfa Aesar, Acros, Ak Sci, Oakwood Chemicals, Strem Chemicals or TCI and were used without further purification.

## 2. Figure S1: Selected Examples of Bioactive Compounds Containing Alkynyl Cyclopropanes

### A. Drug Molecules and Bioactive Compounds Containing Alkynyl Cyclopropane Motifs

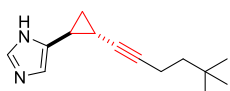

Cipralisant  
(A histamine H3 receptor)

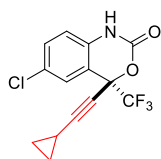

Efavirenz  
(An antiretroviral medication)

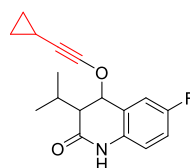

4-[(Cyclopropylethynyl)oxy]-6-Fluoro-3-Isopropylquinolin-2(1H)-one  
(Anti-HIV Agent)

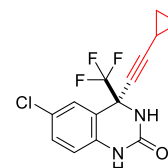

6-Chloro-4-(cyclopropylethynyl)-3,4-dihydro-4-(trifluoromethyl)-2(1H)-quinazolinone  
(Anti-HIV Agent)

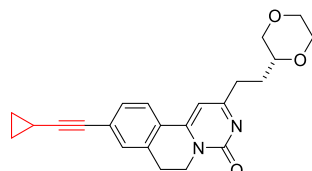

GLPG-1205  
(selective antagonist of GPR84 and treatment for Idiopathic Pulmonary Fibrosis (IPF))

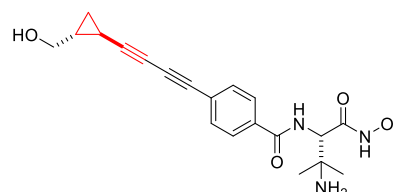

N-[(1S)-2-Amino-1-[(hydroxyamino)carbonyl]-2-methylpropyl]-4-[4-[(1R,2R)-2-(hydroxymethyl)cyclopropyl]-1,3-butadien-1-yl]benzamide  
(Antibacterial Agent)

### B. Natural Products Containing Alkynyl Cyclopropane Motifs

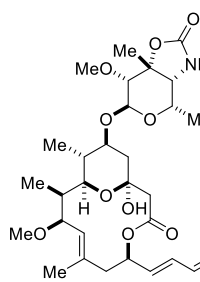

Callipeltoside A

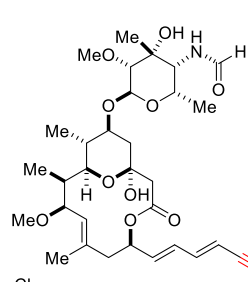

Callipeltoside B

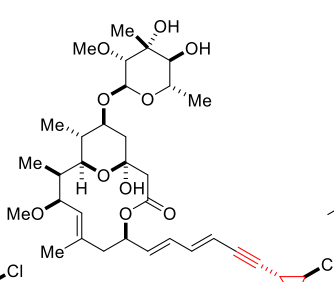

Callipeltoside C

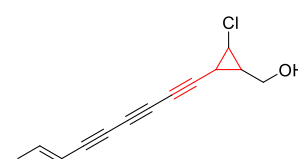

2-Chloro-3-(7-nonene-1,3,5-triynyl)cyclopropanemethanol

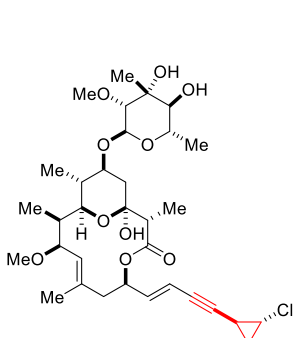

Phorbaside A

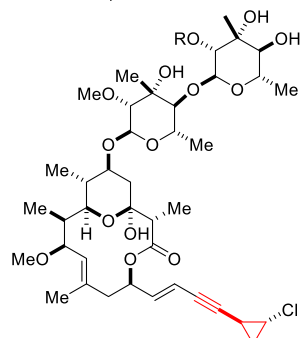

Phorbaside B (R = Me)  
Phorbaside C (R = H)

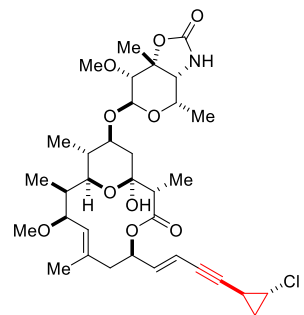

Phorbaside D

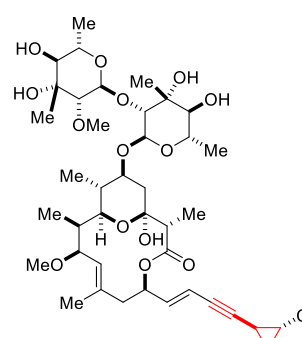

Phorbaside E

### 3. Scheme S1. Solvent and Base Effect on Radical Cyclopropanation

A 10 mL oven-dried Schlenk tube was charged with *N*-sulfonyl hydrazone **1a** (0.10 mmol, 1.0 equiv), [Co(Por)] (2 mol %) and Base. The Schlenk tube was capped with a Teflon screw cap, evacuated and backfilled with nitrogen 3 times. Under nitrogen atmosphere, styrene **2a** (0.20 mmol, 2.0 equiv) and anhydrous solvent (0.6 mL) were added. The Schlenk tube was then purged with nitrogen for 1 min and sealed with the Teflon screw cap. The reaction mixture was stirred at 22°C for 24 h. Following completion of the reaction, the reaction mixture was filtered through a pad of silica gel, concentrated under vacuum and purified by flash column chromatography.

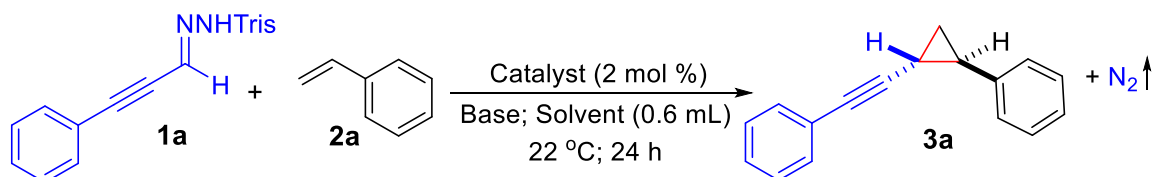

| Catalyst          | Base                           | Solvent         | Yield (%) | dr    | ee (%) |
|-------------------|--------------------------------|-----------------|-----------|-------|--------|
| [Co( <b>P1</b> )] | $CS_2CO_3$ (2.0 equiv)         | Tetrahydrofuran | 14        | 54:46 | N/A    |
| [Co( <b>P1</b> )] | $CS_2CO_3$ (2.0 equiv)         | 1,4-Dioxane     | 5         | 57:43 | N/A    |
| [Co( <b>P1</b> )] | $CS_2CO_3$ (2.0 equiv)         | Benzene         | 19        | 54:46 | N/A    |
| [Co( <b>P1</b> )] | $CS_2CO_3$ (2.0 equiv)         | Toluene         | 26        | 52:48 | N/A    |
| [Co( <b>P1</b> )] | $CS_2CO_3$ (2.0 equiv)         | Methanol        | 25        | 56:44 | N/A    |
| [Co( <b>P3</b> )] | $CS_2CO_3$ (2.0 equiv)         | Methanol        | 38        | 77:23 | 53     |
| [Co( <b>P3</b> )] | $Na_2CO_3$ (2.0 equiv)         | Methanol        | 21        | 77:23 | 53     |
| [Co( <b>P3</b> )] | $K_2CO_3$ (2.0 equiv)          | Methanol        | 28        | 77:23 | 53     |
| [Co( <b>P3</b> )] | $Et_3N$ (2.0 equiv)            | Methanol        | 32        | 72:26 | 51     |
| [Co( <b>P3</b> )] | Hunnig's Base (2.0 equiv)      | Methanol        | 16        | 72:28 | 51     |
| [Co( <b>P3</b> )] | KO <sup>t</sup> Bu (2.0 equiv) | Methanol        | 33        | 77:23 | 53     |
| [Co( <b>P3</b> )] | KH (2.0 equiv)                 | Methanol        | 46        | 77:23 | 53     |
| [Co( <b>P3</b> )] | KH (2.0 equiv)                 | Ethyl Acetate   | 76        | 79:21 | 53     |
| [Co( <b>P3</b> )] | KH (4.0 equiv)                 | Ethyl Acetate   | 98        | 79:21 | 53     |

## 4. Synthesis and Characterization of *N*-Sulfonyl Hydrazones

### 4.1. Experimental Procedure for Preparation of *N*-2,4,6-Triisopropylbenzenesulfonyl Hydrazones

To a stirred solution of 2,4,6-triisopropylbenzenesulfonyl hydrazide (1.0 mmol) in THF (10.0 mL) at room temperature, aldehyde (1.0 equiv) was added dropwise (or portionwise if solid).<sup>1</sup> After the reaction was stirred overnight, the solvent was removed directly under reduced pressure, and the crude mixture was further purified by trituration.

### 4.2. Characterization of *N*-2,4,6-Triisopropylbenzenesulfonyl Hydrazones

#### 3-Phenylpropiolaldehyde 2,4,6-triisopropylbenzenesulfonyl hydrazone (**1a**) Yield: 87%. $R_f = 0.30$

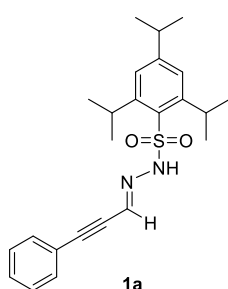

(Hexane/Ethyl Acetate: 7/1). <sup>1</sup>H NMR (600 MHz, CDCl<sub>3</sub>) δ 8.78 (s, 1H), 7.51 (d,  $J = 7.9$  Hz, 2H), 7.45 (t,  $J = 7.1$  Hz, 1H), 7.40 (t,  $J = 7.7$  Hz, 2H), 7.19 (s, 2H), 6.82 (s, 1H), 4.21 (hept,  $J = 6.7$  Hz, 2H), 2.91 (hept,  $J = 6.9$  Hz, 1H), 1.28 (d,  $J = 6.7$  Hz, 12H), 1.26 (d,  $J = 6.7$  Hz, 6H). <sup>13</sup>C NMR (151 MHz, CDCl<sub>3</sub>) δ 153.71, 151.27, 132.19, 131.32, 130.48, 128.86, 124.39, 124.05, 120.41, 103.24, 77.75, 34.33, 30.15, 24.92, 23.66. IR (neat, cm<sup>-1</sup>): 3208.36, 2959.66, 2929.18, 2869.34, 2198.09, 1599.13, 1560.44, 1488.75, 1462.75, 1425.72, 1335.96, 1167.42,

1036.71, 923.23, 757.24, 669.57. HRMS (DART) ([M+H]<sup>+</sup>) Calcd. for C<sub>24</sub>H<sub>31</sub>N<sub>2</sub>O<sub>2</sub>S<sup>+</sup>: 411.21008, found: 441.20865.

#### 3-(*p*-Tolyl)propiolaldehyde 2,4,6-triisopropylbenzenesulfonyl hydrazone (**1b**) Yield: 79%. $R_f = 0.3$

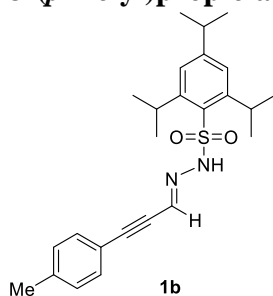

(Hexane/Ethyl Acetate: 10/1). <sup>1</sup>H NMR (600 MHz, CDCl<sub>3</sub>) δ 8.74 (s, 1H), 7.40 (d,  $J = 8.1$  Hz, 2H), 7.21 (d,  $J = 7.9$  Hz, 2H), 7.18 (s, 2H), 6.80 (s, 1H), 4.27 – 4.14 (m, 2H), 2.91 (dt,  $J = 13.8, 6.9$  Hz, 1H), 2.40 (s, 3H), 1.27 (dd,  $J = 13.1, 6.8$  Hz, 18H). <sup>13</sup>C NMR (151 MHz, CDCl<sub>3</sub>) δ 153.67, 151.26, 141.11, 132.13, 131.37, 129.66, 124.71, 124.04, 117.33, 103.74, 77.40, 34.34, 30.16, 24.93, 23.67, 21.84. IR (neat, cm<sup>-1</sup>): 3211.65, 2959.77, 2869.33, 2361.17,

2188.25, 1599.64, 1560.02, 1462.85, 1425.73, 1363.41, 1335.65, 1167.63, 1036.70, 924.00, 726.73. HRMS (DART) ([M+H]<sup>+</sup>) Calcd. for C<sub>25</sub>H<sub>33</sub>N<sub>2</sub>O<sub>2</sub>S<sup>+</sup>: 425.22573, found: 425.22601.

#### 3-(2-Isopropylphenyl)propiolaldehyde 2,4,6-triisopropylbenzenesulfonyl hydrazone (**1c**) Yield: 90%. $R_f = 0.3$

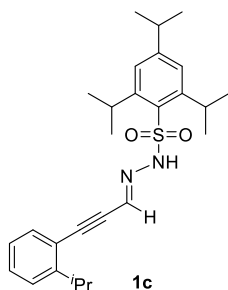

(Hexane/Ethyl Acetate: 10/1). <sup>1</sup>H NMR (600 MHz, CDCl<sub>3</sub>) δ 8.73 (s, 1H), 7.47 (d,  $J = 7.6$  Hz, 1H), 7.42 (t,  $J = 7.6$  Hz, 1H), 7.35 (d,  $J = 7.8$  Hz, 1H), 7.22 (t,  $J = 7.5$  Hz, 1H), 7.19 (s, 2H), 6.85 (s, 1H), 4.21 (hept,  $J = 6.7$  Hz, 2H), 3.38 (hept,  $J = 6.9$  Hz, 1H), 2.91 (hept,  $J = 6.9$  Hz, 1H), 1.31 (d,  $J = 6.9$  Hz, 6H), 1.28 (d,  $J = 6.8$  Hz, 12H), 1.26 (d,  $J = 6.9$  Hz, 6H). <sup>13</sup>C NMR (151 MHz, CDCl<sub>3</sub>) δ 153.71, 151.32, 151.31, 133.14, 131.35, 130.97, 126.13, 125.46, 124.55, 124.05,

119.27, 102.41, 81.49, 34.34, 32.22, 30.18, 24.93, 23.67, 23.25. IR (neat, cm<sup>-1</sup>): 3209.06, 2960.58, 2869.78, 2360.30, 2189.14, 1599.32, 1462.76, 1383.26, 1337.01, 1168.12, 1036.66, 758.10, 665.98. HRMS (DART) ([M+H]<sup>+</sup>) Calcd. for C<sub>27</sub>H<sub>37</sub>N<sub>2</sub>O<sub>2</sub>S<sup>+</sup>: 453.25703, found: 453.25706.

**3-(4-Methoxyphenyl)propionaldehyde 2,4,6-triisopropylbenzenesulfonyl hydrazone (1d)** Yield:

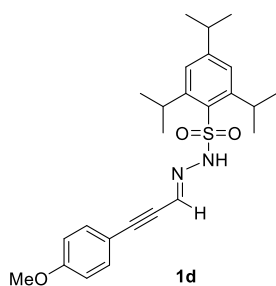

85%.  $R_f = 0.3$  (Hexane/Ethyl Acetate: 8/1).  $^1\text{H NMR}$  (600 MHz,  $\text{CDCl}_3$ )  $\delta$  8.79 (s, 1H), 7.45 (d,  $J = 8.5$  Hz, 2H), 7.19 (s, 2H), 6.90 (d,  $J = 8.6$  Hz, 2H), 6.80 (s, 1H), 4.22 (dt,  $J = 13.3, 6.7$  Hz, 2H), 3.85 (s, 3H), 2.91 (dt,  $J = 13.8, 6.9$  Hz, 1H), 1.27 (dd,  $J = 10.4, 7.0$  Hz, 18H).  $^{13}\text{C NMR}$  (151 MHz,  $\text{CDCl}_3$ )  $\delta$  161.32, 153.62, 151.21, 133.91, 131.36, 124.95, 124.00, 114.53, 112.27, 103.84, 77.14, 55.54, 34.30, 30.11, 24.90, 23.63. IR (neat,  $\text{cm}^{-1}$ ): 3209.86, 2959.06, 2869.51, 2359.98, 2193.19, 1598.06, 1463.31, 1425.28, 1336.01, 1291.42, 1121.29, 1167.09, 1037.64, 943.18, 726.20, 666.89. HRMS (DART) ( $[\text{M}+\text{H}]^+$ ) Calcd. for  $\text{C}_{25}\text{H}_{33}\text{N}_2\text{O}_3\text{S}^+$ : 441.22064, found: 441.22142.

**3-(3-Methoxyphenyl)propionaldehyde 2,4,6-triisopropylbenzenesulfonyl hydrazone (1e)** Yield:

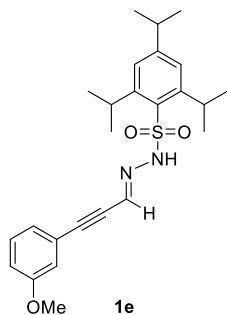

85%.  $R_f = 0.3$  (Hexane/Ethyl Acetate: 20/1).  $^1\text{H NMR}$  (600 MHz,  $\text{CDCl}_3$ )  $\delta$  8.76 (s, 1H), 7.31 (td,  $J = 7.7, 0.9$  Hz, 1H), 7.19 (s, 2H), 7.10 (dt,  $J = 7.6, 1.1$  Hz, 1H), 7.05 – 6.97 (m, 2H), 6.81 (s, 1H), 4.20 (hept,  $J = 6.7$  Hz, 2H), 3.84 (s, 3H), 2.92 (dq,  $J = 13.8, 6.9$  Hz, 1H), 1.36 – 1.24 (m, 18H).  $^{13}\text{C NMR}$  (151 MHz,  $\text{CDCl}_3$ )  $\delta$  159.63, 153.73, 151.27, 131.30, 129.99, 124.73, 124.33, 124.06, 121.33, 117.12, 116.83, 103.15, 77.46, 55.57, 34.34, 30.16, 24.93, 23.66. IR (neat,  $\text{cm}^{-1}$ ): 3212.24, 2959.37, 2868.99, 2360.27, 2188.31, 1603.09, 1508.39, 1296.65, 1252.94, 1167.55, 1035.00, 833.52, 750.11. HRMS (DART) ( $[\text{M}+\text{H}]^+$ ) Calcd. for  $\text{C}_{25}\text{H}_{33}\text{N}_2\text{O}_3\text{S}^+$ : 441.22064, found: 441.22163.

**3-(2-Methoxyphenyl)propionaldehyde 2,4,6-triisopropylbenzenesulfonyl hydrazone drazide (1f)**

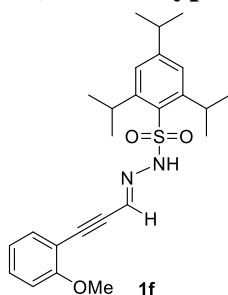

Yield: 85%.  $R_f = 0.3$  (Hexane/Ethyl Acetate: 20/1).  $^1\text{H NMR}$  (600 MHz,  $\text{CDCl}_3$ )  $\delta$  9.66 (s, 1H), 7.46 – 7.43 (m, 1H), 7.40 (d,  $J = 7.5$  Hz, 1H), 7.18 (s, 2H), 7.02 (d,  $J = 8.4$  Hz, 1H), 6.98 (t,  $J = 7.5$  Hz, 1H), 6.74 (s, 1H), 4.31 – 4.24 (m, 2H), 4.10 (s, 3H), 2.94 – 2.87 (m, 1H), 1.26 (dd,  $J = 6.8, 3.7$  Hz, 18H).  $^{13}\text{C NMR}$  (151 MHz,  $\text{CDCl}_3$ )  $\delta$  160.72, 153.38, 151.03, 132.33, 132.21, 131.81, 124.00, 123.90, 120.90, 110.64, 109.74, 101.19, 83.83, 55.99, 34.24, 29.93, 24.87, 23.61. IR (neat,  $\text{cm}^{-1}$ ): 3213.01, 2959.30, 2869.23, 2359.28, 2187.85, 1598.14, 1487.99, 1464.79, 1337.88, 1266.21, 1166.70, 1035.71, 1019.62, 753.08, 668.66. HRMS (DART) ( $[\text{M}+\text{H}]^+$ ) Calcd. for  $\text{C}_{25}\text{H}_{33}\text{N}_2\text{O}_3\text{S}^+$ : 441.22064, found: 441.22216.

**4-(3-Oxoprop-1-yn-1-yl)benzotrile 2,4,6-triisopropylbenzenesulfonyl hydrazone (1g)** Yield:

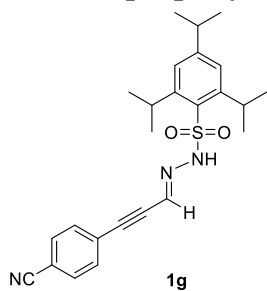

90%.  $R_f = 0.3$  (Hexane/Ethyl Acetate: 15/1).  $^1\text{H NMR}$  (600 MHz,  $\text{CDCl}_3$ )  $\delta$  8.90 (s, 1H), 7.72 – 7.64 (m, 2H), 7.62 – 7.57 (m, 2H), 7.19 (s, 2H), 6.82 (s, 1H), 4.19 (hept,  $J = 6.7$  Hz, 2H), 2.91 (hept,  $J = 6.9$  Hz, 1H), 1.31 – 1.21 (m, 18H).  $^{13}\text{C NMR}$  (151 MHz,  $\text{CDCl}_3$ )  $\delta$  153.99, 151.36, 132.67, 132.44, 131.04, 125.17, 124.12, 122.99, 118.01, 113.82, 100.35, 80.98, 34.35, 30.14, 24.90, 23.66. IR (neat,  $\text{cm}^{-1}$ ): 3207.45, 2962.26, 2229.10, 1598.26, 1380.52, 1332.57, 1219.45, 1166.34, 1037.44. HRMS (DART) ( $[\text{M}+\text{H}]^+$ ) Calcd. for  $\text{C}_{25}\text{H}_{30}\text{N}_3\text{O}_2\text{S}^+$ : 436.20532, found: 436.20638.

**3-(2-Fluorophenyl)propiolaldehyde 2,4,6-triisopropylbenzenesulfonyl hydrazone (1h)** Yield:

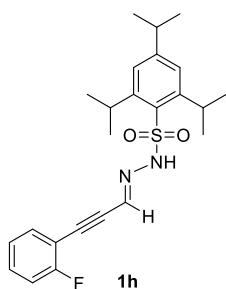

91%.  $R_f = 0.3$  (Hexane/Ethyl Acetate: 20/1).  $^1\text{H NMR}$  (400 MHz,  $\text{CDCl}_3$ )  $\delta$  9.21 (s, 1H), 7.40 (t,  $J = 7.2$  Hz, 1H), 7.35 – 7.29 (m, 2H), 7.22 (s, 2H), 7.06 (dt,  $J = 17.7, 8.2$  Hz, 2H), 4.29 – 4.21 (m, 2H), 2.96 – 2.88 (m, 1H), 1.33 (d,  $J = 6.8$  Hz, 12H), 1.27 (d,  $J = 6.9$  Hz, 6H).  $^{13}\text{C NMR}$  (101 MHz,  $\text{CDCl}_3$ )  $\delta$  162.89 (d,  $J = 253.6$  Hz), 153.84, 151.69, 133.75, 131.30 (d,  $J = 8.0$  Hz), 131.02, 128.89, 124.18 (d,  $J = 3.7$  Hz), 124.15, 115.71 (d,  $J = 20.6$  Hz), 110.47 (d,  $J = 15.5$  Hz), 88.77 (d,  $J = 3.1$  Hz), 87.26, 34.32, 30.20, 24.93, 23.62.  $^{19}\text{F NMR}$  (564 MHz,  $\text{CDCl}_3$ ):  $-113.83$ . IR (neat,  $\text{cm}^{-1}$ ): 3202.62, 2960.19, 2870.09, 2197.93, 2078.94, 1599.11, 1489.80, 1459.77, 1426.07, 1363.70, 1336.84, 1260.07, 1167.91, 1058.83, 1036.83, 941.02, 821.70. HRMS (DART) ( $[\text{M}+\text{H}]^+$ ) Calcd. for  $\text{C}_{24}\text{H}_{30}\text{FN}_2\text{O}_2\text{S}^+$ : 429.20065, found: 429.19980.

**3-(Naphthalen-1-yl)propiolaldehyde 2,4,6-triisopropylbenzenesulfonyl hydrazone (1i)** Yield:

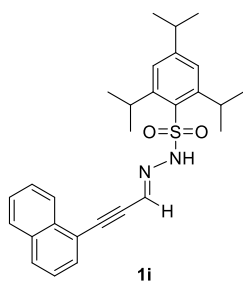

93%.  $R_f = 0.3$  (Hexane/Ethyl Acetate: 15/1).  $^1\text{H NMR}$  (600 MHz,  $\text{CDCl}_3$ )  $\delta$  8.88 (s, 1H), 8.20 (d,  $J = 8.3$  Hz, 1H), 7.97 (d,  $J = 8.3$  Hz, 1H), 7.91 (d,  $J = 8.1$  Hz, 1H), 7.78 (d,  $J = 7.0$  Hz, 1H), 7.66 – 7.62 (m, 1H), 7.59 (dd,  $J = 11.0, 4.0$  Hz, 1H), 7.54 – 7.48 (m, 1H), 7.20 (s, 2H), 6.98 (s, 1H), 4.25 (dt,  $J = 13.5, 6.7$  Hz, 2H), 2.92 (dt,  $J = 13.8, 6.9$  Hz, 1H), 1.29 (d,  $J = 6.8$  Hz, 12H), 1.27 (d,  $J = 6.9$  Hz, 6H).  $^{13}\text{C NMR}$  (151 MHz,  $\text{CDCl}_3$ )  $\delta$  153.75, 151.31, 133.25, 132.90, 132.11,

131.34, 131.21, 128.82, 127.84, 127.12, 125.51, 125.35, 124.45, 124.08, 117.99, 101.65, 82.29, 34.35, 30.21, 24.96, 23.67. IR (neat,  $\text{cm}^{-1}$ ): 3210.51, 2959.06, 2868.68, 2184.79. 1599.00, 1461.98, 1425.64, 1334.26, 1166.76, 1105.60, 1035.93. HRMS (DART) ( $[\text{M}+\text{H}]^+$ ) Calcd. for  $\text{C}_{28}\text{H}_{33}\text{N}_2\text{O}_2\text{S}^+$ : 461.22573, found: 461.22563.

**3-(Phenylethyl)propiolaldehyde 2,4,6-triisopropylbenzenesulfonyl hydrazone (1j)** Yield: 82%.  $R_f$

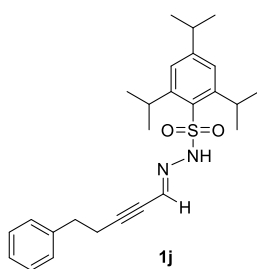

$= 0.3$  (Hexanes/Ethyl Acetate = 10/1).  $^1\text{H NMR}$  (500 MHz,  $\text{CDCl}_3$ )  $\delta$  8.52 (s, 1H), 7.37 (t,  $J = 7.5$  Hz, 2H), 7.30 – 7.22 (m, 3H), 7.16 (s, 2H), 6.53 (d,  $J = 1.7$  Hz, 1H), 4.12 (hept,  $J = 6.7$  Hz, 2H), 2.96 – 2.84 (m, 3H), 2.77 (t,  $J = 7.2$  Hz, 2H), 1.26 (s, 6H), 1.24 (d,  $J = 7.0$  Hz, 12H).  $^{13}\text{C NMR}$  (126 MHz,  $\text{CDCl}_3$ )  $\delta$  153.55, 151.21, 139.57, 131.40, 128.96, 128.40, 127.03, 124.73, 123.97, 104.84, 71.29, 34.30, 34.26, 30.00, 24.85, 23.64, 21.94. IR (neat,  $\text{cm}^{-1}$ ): 3215.93,

2958.77, 2209.25, 1599.51, 1425.21, 1334.27, 1167.71, 1035.85. HRMS (DART) ( $[\text{M}+\text{H}]^+$ ) Calcd. for  $\text{C}_{26}\text{H}_{35}\text{N}_2\text{O}_2\text{S}^+$ : 439.2413, found: 439.2418.

**3-(Triisopropylsilyl)propiolaldehyde 2,4,6-triisopropylbenzenesulfonyl hydrazone hydrazide (1k)** Yield: 80%.  $R_f = 0.3$  (Hexane/Ethyl Acetate: 25:1).

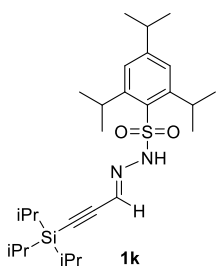

$^1\text{H NMR}$  (600 MHz,  $\text{CDCl}_3$ )  $\delta$  8.72 (s, 1H), 7.18 (s, 2H), 6.60 (s, 1H), 4.25 – 4.12 (m, 2H), 2.90 (hept,  $J = 6.9$  Hz, 1H), 1.26 (dd,  $J = 6.8, 5.4$  Hz, 18H), 1.15 – 1.10 (m, 21H).  $^{13}\text{C NMR}$  (151 MHz,  $\text{CDCl}_3$ )  $\delta$  153.68, 151.32, 131.41, 124.03, 123.94, 108.69, 94.38, 34.35, 30.19, 24.99, 23.67, 18.68, 11.13. IR (neat,  $\text{cm}^{-1}$ ): 3209.88, 2960.97, 2866.10, 2361.47, 2341.66, 1599.80, 1550.36, 1462.13, 1425.85, 1380.21, 1363.82, 1335.33,



1172.34, 1103.99, 1070.21, 1037.47, 1019.85, 941.06, 922.35, 882.85, 757.41, 730.62. HRMS (DART) ( $[M+H]^+$ ) Calcd. for  $C_{27}H_{47}N_2O_2SSi^+$ : 491.31220, found: 491.31171.

## 5. Synthesis and Characterization of Alkynyl Cyclopropanes

### 5.1. Experimental Procedure for [Co(Por)]-Catalyzed Asymmetric Cyclopropanation

A 10 mL oven-dried Schlenk tube was charged with *N*-sulfonyl hydrazone (0.10 mmol, 1.0 equiv), [Co(Por)] (2 mol %) and KH (0.40 mmol, 4.0 equiv). The Schlenk tube was capped with a Teflon screw cap, evacuated and backfilled with nitrogen 3 times. Under nitrogen atmosphere, olefin (0.20 mmol, 2.0 equiv) and anhydrous ethyl acetate (0.6 mL) were added. The Schlenk tube was then purged with nitrogen for 1 min and sealed with the Teflon screw cap. The reaction mixture was stirred at 22°C for 24 h. Following completion of the reaction, the reaction mixture was filtered through a pad of silica gel, concentrated under vacuum and purified by flash column chromatography.

### 5.2. Characterization of Alkynyl Cyclopropane Products

**((1*R*,2*R*)-(2-Phenylcyclopropyl)ethynyl)benzene ((-)-**3a**)** Yield: 90%. dr: 87:13.  $R_f = 0.3$  (Hexane/Ethyl Acetate: 20/1).  $[\alpha]_D^{20} = (-) -192.98^\circ$  ( $c = 0.5$ ,  $CHCl_3$ ).  $^1H$  NMR (500 MHz,  $CDCl_3$ )  $\delta$  7.43 – 7.39 (m, 2H), 7.33 – 7.27 (m, 5H), 7.21 – 7.18 (m, 1H), 7.15 – 7.12 (m, 2H), 2.37 (ddd,  $J = 8.8, 6.1, 4.6$  Hz, 1H), 1.72 (ddd,  $J = 8.7, 5.6, 4.6$  Hz, 1H), 1.45 – 1.41 (m, 1H), 1.37 – 1.33 (m, 1H).  $^{13}C$  NMR (126 MHz,  $CDCl_3$ )  $\delta$  140.89, 131.76, 128.57, 128.35, 127.75, 126.38, 126.12, 123.86, 92.05, 77.19, 26.74, 18.18, 12.22. IR (neat,  $cm^{-1}$ ): 3030.36, 2959.46, 2926.32, 2360.59, 2225.21, 1976.75, 1598.37, 1491.23, 1457.55, 1178.57, 1070.09, 911.31, 755.37, 691.47. HRMS (DART) ( $[M+H]^+$ ) Calcd. for  $C_{17}H_{15}^+$ : 219.11683, found 219.11631. HPLC analysis: ee = 96%. IC (100% hexanes, 0.8 mL/min):  $t_{major} = 14.56$  min,  $t_{minor} = 17.34$  min.

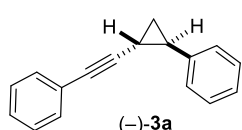

**1-Methyl-4-(((1*R*,2*R*)-2-phenylcyclopropyl)ethynyl)benzene ((-)-**3b**)** Yield: 90%. dr: 79:21.  $R_f = 0.3$  (Hexane/Ethyl Acetate: 20/1).  $[\alpha]_D^{20} = (-) -187.98^\circ$  ( $c = 0.5$ ,  $CHCl_3$ ).  $^1H$  NMR (500 MHz,  $CDCl_3$ )  $\delta$  7.32 – 7.27 (m, 4H), 7.19 (t,  $J = 7.4$  Hz, 1H), 7.14 – 7.09 (m, 4H), 2.41 – 2.35 (m, 1H), 2.34 (s, 3H), 1.70 (dt,  $J = 9.6, 5.0$  Hz, 1H), 1.41 (dt,  $J = 9.9, 5.1$  Hz, 1H), 1.33 (dt,  $J = 10.5, 5.4$  Hz, 1H).  $^{13}C$  NMR (126 MHz,  $CDCl_3$ )  $\delta$  140.98, 137.75, 131.64, 129.11, 128.56, 126.34, 126.11, 120.75, 91.22, 77.24, 26.70, 21.56, 18.17, 12.27. IR (neat,  $cm^{-1}$ ): 3027.56, 2921.15, 2225.19, 2157.79, 1604.05, 1509.97, 1457.26, 1030.99, 948.51, 816.04, 747.88, 696.57. HRMS (DART) ( $[M+H]^+$ ) Calcd. for  $C_{18}H_{17}^+$ : 233.13248, found: 233.13261. HPLC analysis: ee = 97%. IC (100% hexanes, 0.8 mL/min):  $t_{major} = 20.35$  min,  $t_{minor} = 26.07$  min.

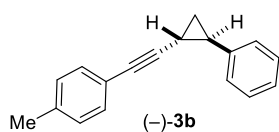

**1-Isopropyl-2-(((1*R*,2*R*)-2-phenylcyclopropyl)ethynyl)benzene ((-)-**3c**)** Yield: 90%. dr: 96:4.  $R_f = 0.3$  (Hexane/Ethyl Acetate: 30/1).  $[\alpha]_D^{20} = (-) -417.51^\circ$  ( $c = 0.5$ ,  $CHCl_3$ ).  $^1H$  NMR (600 MHz,  $CDCl_3$ )  $\delta$  7.38 (d,  $J = 7.6$  Hz, 1H), 7.30 (t,  $J = 7.3$  Hz, 2H), 7.25 (d,  $J = 4.3$  Hz, 2H), 7.21 (t,  $J = 7.1$  Hz, 1H), 7.14 – 7.09 (m, 3H), 3.49 – 3.40 (m, 1H),

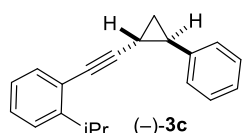

2.38 – 2.34 (m, 1H), 1.76 (dt,  $J = 9.4, 4.9$  Hz, 1H), 1.45 – 1.42 (m, 1H), 1.39 – 1.35 (m, 1H), 1.27 (d,  $J = 6.8$  Hz, 6H).  $^{13}\text{C}$  NMR (151 MHz,  $\text{CDCl}_3$ )  $\delta$  150.53, 141.00, 132.46, 128.59, 128.09, 126.37, 126.08, 125.54, 124.94, 122.55, 95.65, 75.79, 31.61, 26.87, 23.20, 23.18, 18.40, 12.50. IR (neat,  $\text{cm}^{-1}$ ): 3025.41, 2958.77, 2221.27, 1603.66, 1483.61, 1027.89, 947.56, 757.37, 696.75. HRMS (DART) ( $[\text{M}+\text{H}]^+$ ) Calcd. for  $\text{C}_{20}\text{H}_{21}^+$ : 261.16378, found: 261.16452. HPLC analysis: ee = 99%. IC (100% hexanes, 0.5 mL/min):  $t_{\text{major}} = 17.43$  min,  $t_{\text{minor}} = 15.65$  min.

**1-Methoxy-4-(((1*R*,2*R*)-2-phenylcyclopropyl)ethynyl)benzene ((-)-3d)** Yield: 90%. dr: 85:15.  $R_f =$

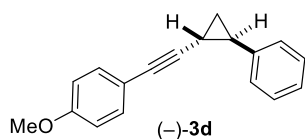

0.3 (Hexane/Ethyl Acetate: 20/1).  $[\alpha]_D^{20} = (-) -151.56^\circ$  ( $c = 0.5$ ,  $\text{CHCl}_3$ ).  $^1\text{H}$  NMR (500 MHz,  $\text{CDCl}_3$ )  $\delta$  7.33 – 7.25 (m, 2H), 7.19 (dd,  $J = 13.4, 7.0$  Hz, 2H), 7.12 (d,  $J = 7.5$  Hz, 2H), 7.00 (d,  $J = 7.5$  Hz, 1H), 6.94 (s, 1H), 6.84 (d,  $J = 8.4$  Hz, 1H), 3.80 (s, 3H), 2.37 (dd,  $J = 11.6, 7.3$  Hz, 1H), 1.75 – 1.67 (m, 1H), 1.47 – 1.40 (m, 1H), 1.35 (dd,  $J = 12.7, 6.3$  Hz, 1H).  $^{13}\text{C}$  NMR (126 MHz,  $\text{CDCl}_3$ )  $\delta$  158.32, 132.86, 131.74, 129.53, 128.33, 127.70, 127.35, 114.03, 92.30, 77.06, 55.46, 26.09, 17.73, 11.71. IR (neat,  $\text{cm}^{-1}$ ): 3004.01, 2832.88, 2222.28, 1735.61, 1596.76, 1573.47, 1490.18, 1458.41, 1426.86, 1285.02, 1214.10, 1161.09, 1044.51, 900.13, 785.39, 697.99. HRMS (DART) ( $[\text{M}+\text{H}]^+$ ) Calcd. for  $\text{C}_{18}\text{H}_{17}\text{O}^+$ : 249.12739, found: 249.12800. HPLC analysis: ee = 98%. ID (99.5% hexanes: 0.5% isopropanol, 0.8 mL/min):  $t_{\text{major}} = 19.23$  min,  $t_{\text{minor}} = 16.79$  min.

**1-Methoxy-3-(((1*R*,2*R*)-2-phenylcyclopropyl)ethynyl)benzene ((-)-3e)** Yield: 94%. dr: 90:10.  $R_f =$

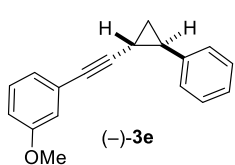

0.3 (Hexane/Ethyl Acetate: 20/1).  $[\alpha]_D^{20} = (-) -90.93^\circ$  ( $c = 0.5$ ,  $\text{CHCl}_3$ ).  $^1\text{H}$  NMR (500 MHz,  $\text{CDCl}_3$ )  $\delta$  7.32 – 7.27 (m, 2H), 7.23 – 7.11 (m, 4H), 7.03 – 6.99 (m, 1H), 6.94 (dd,  $J = 2.5, 1.4$  Hz, 1H), 6.84 (ddd,  $J = 8.3, 2.6, 0.8$  Hz, 1H), 3.80 (s, 3H), 2.37 (ddd,  $J = 8.8, 6.1, 4.6$  Hz, 1H), 1.71 (ddd,  $J = 8.7, 5.6, 4.6$  Hz, 1H), 1.43 (ddd,  $J = 8.8, 5.6, 4.9$  Hz, 1H), 1.35 (ddd,  $J = 8.7, 6.2, 4.8$  Hz, 1H).  $^{13}\text{C}$  NMR (126 MHz,  $\text{CDCl}_3$ )  $\delta$  159.43, 140.85, 129.40, 128.58, 126.40, 126.13, 124.86, 124.33, 116.57, 114.47, 91.93, 77.13, 55.38, 26.75, 18.16, 12.19. IR (neat,  $\text{cm}^{-1}$ ): 3029.78, 2931.66, 2835.34, 2225.55, 1605.33, 1510.25, 1457.81, 1288.71, 1248.50, 1173.27, 1029.39, 832.80, 749.26, 698.59. HRMS (DART) ( $[\text{M}+\text{H}]^+$ ) Calcd. for  $\text{C}_{18}\text{H}_{17}\text{O}^+$ : 249.12739, found: 249.12807. HPLC analysis: ee = 99%. IE (99.5% hexanes: 0.5% isopropanol, 0.8 mL/min):  $t_{\text{major}} = 19.52$  min,  $t_{\text{minor}} = 16.54$  min.

**1-Methoxy-2-(((1*R*,2*R*)-2-phenylcyclopropyl)ethynyl)benzene ((-)-3f)** Yield: 99%. dr: 94:6.  $R_f =$

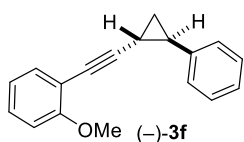

0.3 (Hexane/Ethyl Acetate: 20/1).  $[\alpha]_D^{20} = (-) -120.65^\circ$  ( $c = 0.5$ ,  $\text{CHCl}_3$ ).  $^1\text{H}$  NMR (600 MHz,  $\text{CDCl}_3$ ):  $\delta$  7.38 (dd,  $J = 7.5, 1.5$  Hz, 1H), 7.29 – 7.23 (m, 3H), 7.19 (t,  $J = 7.4$  Hz, 1H), 7.12 (d,  $J = 7.5$  Hz, 2H), 6.91 – 6.83 (m, 2H), 3.88 (s, 3H), 2.50 – 2.33 (m, 1H), 1.79 (dt,  $J = 8.8, 5.2$  Hz, 1H), 1.46 (dt,  $J = 8.9, 5.3$  Hz, 1H), 1.39 – 1.31 (m, 1H).  $^{13}\text{C}$  NMR (151 MHz,  $\text{CDCl}_3$ ):  $\delta$  160.15, 141.04, 133.84, 129.15, 128.53, 126.31, 126.12, 120.55, 112.93, 110.67, 96.20, 73.24, 55.92, 26.89, 18.48, 12.60. IR (neat,  $\text{cm}^{-1}$ ): 3026.46, 2933.30, 2224.21, 2144.80, 1595.45, 1574.20, 1494.20, 1461.81, 1434.12, 1262.24, 1025.21, 950.32, 752.69, 698.71. HRMS (DART) ( $[\text{M}+\text{H}]^+$ ) Calcd. for  $\text{C}_{18}\text{H}_{17}\text{O}^+$ : 249.12739, found: 249.12833. HPLC analysis: ee = 95%. IA (99% hexanes: 1% isopropanol, 0.8 mL/min):  $t_{\text{major}} = 7.84$  min,  $t_{\text{minor}} = 7.35$  min.

**4-(((1*R*,2*R*)-2-Phenylcyclopropyl)ethynyl)benzonitrile ((-)-3g)** Yield: 94%. dr: 90:10.  $R_f = 0.3$

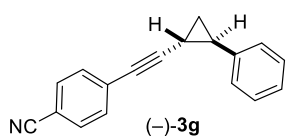

(Hexane/Ethyl Acetate: 20/1).  $[\alpha]_D^{20} = (-)-96.44^\circ$  ( $c = 0.5$ ,  $\text{CHCl}_3$ ).  $^1\text{H NMR}$  (600 MHz,  $\text{CDCl}_3$ ):  $\delta$  7.59 – 7.55 (m, 2H), 7.48 – 7.45 (m, 2H), 7.30 (t,  $J = 7.5$  Hz, 2H), 7.24 – 7.20 (m, 1H), 7.14 – 7.11 (m, 2H), 2.40 (ddd,  $J = 8.9, 6.3, 4.6$  Hz, 1H), 1.72 (ddd,  $J = 8.7, 5.6, 4.6$  Hz, 1H), 1.48 – 1.43 (m, 1H), 1.41 (ddd,  $J = 8.7, 6.3, 4.9$  Hz, 1H).  $^{13}\text{C NMR}$  (151 MHz,  $\text{CDCl}_3$ )  $\delta$  140.31, 132.22, 132.07, 128.96, 128.67, 126.64, 126.14, 118.76, 110.99, 97.27, 76.05, 27.04, 18.22, 12.11. IR (neat,  $\text{cm}^{-1}$ ): 2960.52, 2916.60, 2224.00, 2171.15, 1602.59, 1500.30, 1458.90, 1344.91, 1219.35, 1178.01, 1105.49. HRMS (DART) ( $[\text{M}+\text{H}]^+$ ) Calcd. for  $\text{C}_{18}\text{H}_{14}\text{N}^+$ : 244.11208, found: 244.11371. HPLC analysis: ee = 90%. IA (99.2% hexanes: 0.8% isopropanol, 1.0 mL/min):  $t_{\text{major}} = 11.05$  min,  $t_{\text{minor}} = 8.36$  min.

**1-Fluoro-2-(((1*R*,2*R*)-2-phenylcyclopropyl)ethynyl)benzene ((-)-3h)** Yield: 90%. dr: 93:7.  $R_f = 0.3$

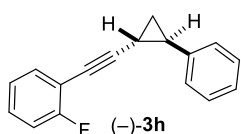

(Hexane/Ethyl Acetate: 20/1);  $[\alpha]_D^{20} = (-)-119.42^\circ$  ( $c = 0.5$ ,  $\text{CHCl}_3$ );  $^1\text{H NMR}$  (400 MHz,  $\text{CDCl}_3$ )  $\delta$  7.40 (t,  $J = 7.4$  Hz, 1H), 7.33 – 7.27 (m, 2H), 7.25 – 7.22 (m, 1H), 7.20 (t,  $J = 7.3$  Hz, 1H), 7.13 (d,  $J = 7.6$  Hz, 1H), 7.05 (dd,  $J = 17.5, 8.5$  Hz, 2H), 2.42 – 2.38 (m, 1H), 1.77 – 1.74 (m, 1H), 1.48 – 1.44 (m, 1H), 1.38 (dt,  $J = 9.5, 5.5$  Hz, 1H).  $^{13}\text{C NMR}$  (151MHz,  $\text{CDCl}_3$ )  $\delta$  163.05 (d,  $J = 250.3$  Hz), 140.71, 133.71 (d,  $J = 1.2$  Hz), 129.34 (d,  $J = 7.8$  Hz), 128.59, 126.45, 126.13, 123.94 (d,  $J = 3.7$  Hz), 115.50 (d,  $J = 21.0$  Hz), 112.37 (d,  $J = 15.8$  Hz), 97.43 (d,  $J = 3.1$  Hz), 70.47, 26.88, 18.29, 12.29.  $^{19}\text{F NMR}$  (564MHz,  $\text{CDCl}_3$ )  $\delta$  -110.86 (s, 1F). IR (neat,  $\text{cm}^{-1}$ ): 3053.04, 2925.74, 2853.66, 2157.23, 1604.00, 1494.46, 1264.14, 895.94, 731.81, 703.27. HRMS (DART) ( $[\text{M}+\text{H}]^+$ ) Calcd. for  $\text{C}_{17}\text{H}_{13}\text{F}^+$ : 237.10741, found: 237.10823. HPLC analysis: ee = 98%. IC (100% hexanes, 0.8 mL/min):  $t_{\text{major}} = 17.56$  min,  $t_{\text{minor}} = 15.84$  min.

**1-(((1*R*,2*R*)-2-phenylcyclopropyl)ethynyl)naphthalene ((-)-3i)** Yield: 95%. dr: 80:20.  $R_f = 0.3$

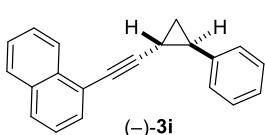

(Hexane/Ethyl Acetate: 20/1).  $[\alpha]_D^{20} = (-)-94.31^\circ$  ( $c = 0.5$ ,  $\text{CHCl}_3$ )  $^1\text{H NMR}$  (500 MHz,  $\text{CDCl}_3$ )  $\delta$  8.36 (d,  $J = 8.4$  Hz, 1H), 7.86 (d,  $J = 8.1$  Hz, 1H), 7.80 (d,  $J = 8.3$  Hz, 1H), 7.66 (dd,  $J = 7.1, 1.1$  Hz, 1H), 7.59 (ddd,  $J = 8.3, 6.8, 1.3$  Hz, 1H), 7.53 (ddd,  $J = 8.1, 6.9, 1.3$  Hz, 1H), 7.42 (dd,  $J = 8.2, 7.2$  Hz, 1H), 7.35 – 7.31 (m, 2H), 7.27 – 7.22 (m, 1H), 7.19 (dd,  $J = 8.1, 1.0$  Hz, 2H), 2.51 (ddd,  $J = 8.9, 6.1, 4.5$  Hz, 1H), 1.90 (ddd,  $J = 8.7, 5.6, 4.6$  Hz, 1H), 1.57 (ddd,  $J = 8.9, 5.7, 4.9$  Hz, 1H), 1.46 (ddd,  $J = 8.7, 6.2, 4.9$  Hz, 1H).  $^{13}\text{C NMR}$  (126 MHz,  $\text{CDCl}_3$ )  $\delta$  140.86, 133.69, 133.33, 130.29, 128.62, 128.37, 128.16, 126.67, 126.44, 126.40, 126.35, 126.14, 125.36, 121.53, 97.16, 75.25, 27.07, 18.52, 12.53. IR (neat,  $\text{cm}^{-1}$ ): 3057.62, 2922.15, 2220.80, 1603.97, 1584.51, 1497.84, 1457.41, 1400.50, 1215.93, 1183.31, 1018.73. HRMS (DART) ( $[\text{M}+\text{H}]^+$ ) Calcd. for  $\text{C}_{21}\text{H}_{17}^+$ : 269.13248, found: 269.13270. HPLC analysis: ee = 90%. IA (100% hexanes, 0.8 mL/min):  $t_{\text{major}} = 16.42$  min,  $t_{\text{minor}} = 20.87$  min.

**((1*R*,2*R*)-2-(4-phenylbut-1-yn-1-yl)cyclopropyl)benzene ((-)-3j)** Yield: 41%. dr: 91:9.  $R_f = 0.4$

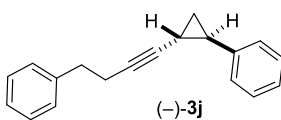

(Hexanes/Ethyl Acetate = 20/1).  $[\alpha]_D^{20} = (-)-253.30^\circ$  ( $c=0.5$ ,  $\text{CHCl}_3$ ).  $^1\text{H NMR}$  (500 MHz,  $\text{CHCl}_3$ )  $\delta$  7.29 (q,  $J = 6.6$  Hz, 4H), 7.23 (t,  $J = 7.2$  Hz, 3H), 7.17 (t,  $J = 7.4$  Hz, 1H), 7.09 – 7.04 (m, 2H), 2.81 (t,  $J = 7.6$  Hz, 2H), 2.45 (td,  $J = 7.6, 1.9$  Hz, 2H), 2.14 (ddd,  $J = 8.7, 6.0, 4.5$  Hz, 1H), 1.46 (ddd,  $J = 8.1, 6.3, 4.2, 1.9$  Hz, 1H), 1.24 – 1.15 (m, 2H).  $^{13}\text{C NMR}$  (151 MHz,  $\text{CHCl}_3$ )  $\delta$  141.29, 141.05, 128.63, 128.50, 128.45, 126.35,

126.20, 126.02, 82.88, 76.42, 35.64, 26.15, 21.25, 17.80, 11.75. IR (neat,  $\text{cm}^{-1}$ ): 3026.43, 2924.37, 1603.83, 1495.48, 1453.88, 1275.36, 1260.61, 749.58. HRMS (DART) ( $[\text{M}+\text{H}]^+$ ) Calcd. for  $\text{C}_{19}\text{H}_{19}^+$ : 247.1481, found: 247.1484. HPLC analysis: ee = 85%. IC (99.9% hexanes : 0.1% isopropanol, 0.8 mL/min):  $t_{\text{major}} = 6.50$  min,  $t_{\text{minor}} = 7.19$  min.

**Triisopropyl(((1R,2R)-2-phenylcyclopropyl)ethynyl)silane ((-)-3k)** Yield: 71%. dr: 96:4.  $R_f = 0.3$

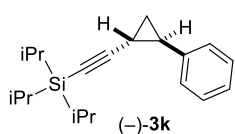

(Hexane/Ethyl Acetate: 30/1).  $[\alpha]_D^{20} = (-)-62.18^\circ$  ( $c = 0.5$ ,  $\text{CHCl}_3$ ).  $^1\text{H NMR}$  (600 MHz,  $\text{CDCl}_3$ ):  $\delta$  7.27 (t,  $J = 7.6$  Hz, 2H), 7.18 (t,  $J = 7.4$  Hz, 1H), 7.08 (d,  $J = 7.2$  Hz, 2H), 2.25 (ddd,  $J = 8.8, 6.0, 4.6$  Hz, 1H), 1.59 – 1.55 (m, 1H), 1.34 – 1.30 (m, 1H), 1.24 (ddd,  $J = 8.7, 6.1, 4.7$  Hz, 1H), 1.09 – 1.04 (m, 21H).  $^{13}\text{C NMR}$  (151 MHz,  $\text{CDCl}_3$ ):  $\delta$  141.01, 128.54, 126.33, 126.02, 110.70, 76.90, 27.08, 18.79, 18.73, 12.56, 11.47. IR (neat,  $\text{cm}^{-1}$ ): 3029.62, 2941.29, 2863.78, 2158.44, 1731.59, 1604.88, 1461.55, 1382.49, 1126.08, 1072.72, 995.91, 883.40, 747.93, 696.28, 677.48. HRMS (DART) ( $[\text{M}+\text{H}]^+$ ) Calcd. for  $\text{C}_{20}\text{H}_{31}\text{Si}^+$ : 299.21895, found: 299.21913. HPLC analysis: ee = 87%. IC (100% hexanes, 0.8 mL/min):  $t_{\text{major}} = 6.28$  min,  $t_{\text{minor}} = 6.64$  min.

**1-(((1R,2R)-2-(4-(tert-Butyl)phenyl)cyclopropyl)ethynyl)-2-methoxybenzene ((-)-3l)** Yield: 94%.

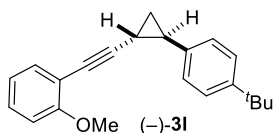

dr: 91:9.  $R_f = 0.3$  (Hexane/Ethyl Acetate: 20/1).  $[\alpha]_D^{20} = (-)-154.77^\circ$  ( $c = 0.5$ ,  $\text{CHCl}_3$ ).  $^1\text{H NMR}$  (600 MHz,  $\text{CDCl}_3$ ):  $\delta$  7.38 (dd,  $J = 7.5, 1.7$  Hz, 1H), 7.34 – 7.30 (m, 2H), 7.25 – 7.22 (m, 1H), 7.08 – 7.05 (m, 2H), 6.90 – 6.84 (m, 2H), 3.88 (s, 3H), 2.37 (ddd,  $J = 8.9, 6.1, 4.6$  Hz, 1H), 1.76 (ddd,  $J = 8.7, 5.6, 4.6$  Hz, 1H), 1.43 (ddd,  $J = 8.9, 5.5, 4.8$  Hz, 1H), 1.36 – 1.31 (m, 10H).  $^{13}\text{C NMR}$  (151 MHz,  $\text{CDCl}_3$ ):  $\delta$  160.14, 149.26, 137.99, 133.83, 129.09, 125.85, 125.44, 120.53, 113.01, 110.67, 96.40, 73.11, 55.91, 34.54, 31.50, 26.50, 18.30, 12.42. IR (neat,  $\text{cm}^{-1}$ ): 3005.32, 2959.45, 2224.63, 1505.13, 1574.07, 1493.24, 1462.24, 1433.35, 1362.33, 1260.43, 1239.75, 1122.33, 1023.86, 913.75, 749.57. HRMS (DART) ( $[\text{M}+\text{H}]^+$ ) Calcd. for  $\text{C}_{22}\text{H}_{25}\text{O}^+$ : 305.18999, found: 305.19136. HPLC analysis: ee = 89%. IC (99% hexanes: 1% isopropanol, 0.8 mL/min):  $t_{\text{major}} = 7.35$  min,  $t_{\text{minor}} = 19.02$  min.

**1-Methoxy-2-(((1R,2R)-2-(4-methoxyphenyl)cyclopropyl)ethynyl)benzene ((-)-3m)** Yield: 89%.

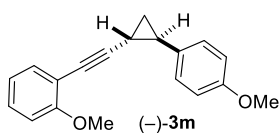

dr: 90:10.  $R_f = 0.3$  (Hexane/Ethyl Acetate: 20/1).  $[\alpha]_D^{20} = (-)-268.89^\circ$  ( $c = 0.5$ ,  $\text{CHCl}_3$ ).  $^1\text{H NMR}$  (500 MHz,  $\text{CDCl}_3$ ):  $\delta$  7.37 (dd,  $J = 7.6, 1.7$  Hz, 1H), 7.26 – 7.22 (m, 1H), 7.08 – 7.04 (m, 2H), 6.90 – 6.80 (m, 4H), 3.88 (s, 3H), 3.79 (s, 3H), 2.36 (ddd,  $J = 8.8, 6.1, 4.6$  Hz, 1H), 1.70 (ddd,  $J = 8.7, 5.5, 4.6$  Hz, 1H), 1.40 (ddd,  $J = 8.8, 5.5, 4.8$  Hz, 1H), 1.28 (ddd,  $J = 8.7, 6.2, 4.7$  Hz, 1H).  $^{13}\text{C NMR}$  (126 MHz,  $\text{CDCl}_3$ ):  $\delta$  160.12, 158.26, 133.81, 133.00, 129.08, 127.34, 120.52, 113.98, 112.99, 110.66, 96.45, 73.10, 55.90, 55.44, 26.22, 18.02, 12.07. IR (neat,  $\text{cm}^{-1}$ ): 3004.06, 2834.59, 2221.30, 1712.67, 1595.27, 1514.93, 1493.71, 1246.07, 1032.57, 753.19. HRMS (DART) ( $[\text{M}+\text{H}]^+$ ) Calcd. for  $\text{C}_{19}\text{H}_{19}\text{O}_2^+$ : 279.13796, found: 279.13922. HPLC analysis: ee = 94%. IC (98% hexanes: 2% isopropanol, 0.8 mL/min):  $t_{\text{major}} = 12.62$  min,  $t_{\text{minor}} = 26.52$  min.

**4-(((1R,2R)-2-((2-Methoxyphenyl)ethynyl)cyclopropyl)benzonitrile ((-)-3n)** Yield: 85%. dr: 81:19.

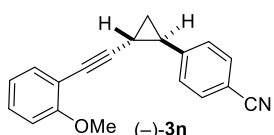

$R_f = 0.3$  (Hexane/Ethyl Acetate: 20/1).  $[\alpha]_D^{20} = (-)-166.32^\circ$  ( $c = 0.5$ ,  $\text{CHCl}_3$ ).  $^1\text{H NMR}$  (600 MHz,  $\text{CDCl}_3$ ):  $\delta$  7.56 (d,  $J = 8.4$  Hz, 2H), 7.37 (dd,  $J = 7.6, 1.7$  Hz, 1H), 7.28 – 7.24 (m, 1H), 7.18 (d,  $J = 8.3$  Hz, 2H), 6.89 – 6.85 (m, 2H),

3.88 (s, 3H), 2.42 (ddd,  $J = 8.8, 6.0, 4.5$  Hz, 1H), 1.85 (ddd,  $J = 8.8, 5.9, 4.5$  Hz, 1H), 1.57 (ddd,  $J = 8.8, 5.8, 5.1$  Hz, 1H), 1.40 (ddd,  $J = 8.8, 6.0, 5.1$  Hz, 1H).  $^{13}\text{C}$  NMR (151 MHz,  $\text{CDCl}_3$ ):  $\delta$  160.16, 146.93, 133.82, 132.35, 129.47, 126.61, 120.57, 119.08, 112.44, 110.67, 109.91, 94.82, 74.14, 55.90, 26.94, 19.31, 13.91. IR (neat,  $\text{cm}^{-1}$ ): 2958.79, 2924.59, 2852.88, 2360.28, 2342.02, 2225.74, 2158.90, 1718.70, 1607.79, 1595.93, 1493.62, 1463.86, 1434.85, 1262.91, 1241.84, 1122.93, 1023.71, 837.06, 752.98. HRMS (DART) ( $[\text{M}+\text{H}]^+$ ) Calcd. for  $\text{C}_{19}\text{H}_{16}\text{NO}^+$ : 274.12264, found: 274.12280. HPLC analysis: ee = 95%. IC (90% hexanes: 10% isopropanol, 1 mL/min):  $t_{\text{major}} = 26.22$  min,  $t_{\text{minor}} = 45.85$  min.

**1-Methoxy-2-(((1*R*,2*R*)-2-(3-nitrophenyl)cyclopropyl)ethynyl)benzene ((-)-3o)** Yield: 88%. dr:

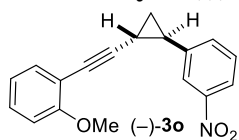

78:22.  $R_f = 0.3$  (Hexane/Ethyl Acetate: 20/1).  $[\alpha]_D^{20} = (-) -144.58^\circ$  ( $c = 0.5$ ,  $\text{CHCl}_3$ ).  $^1\text{H}$  NMR (600 MHz,  $\text{CDCl}_3$ ):  $\delta$  8.04 (dd,  $J = 7.3, 2.1$  Hz, 1H), 7.96 (s, 1H), 7.46 (t,  $J = 7.7$  Hz, 2H), 7.38 (dd,  $J = 7.5, 1.3$  Hz, 1H), 7.27 (d,  $J = 15.8$  Hz, 1H), 6.89 (t,  $J = 7.5$  Hz, 1H), 6.86 (d,  $J = 8.4$  Hz, 1H), 3.88 (s, 3H), 2.52 – 2.47 (m, 1H), 1.86 (dt,  $J = 10.1, 5.2$  Hz, 1H), 1.58 (dt,  $J = 8.7, 5.4$  Hz, 1H), 1.43 (dt,  $J = 8.8, 5.6$  Hz, 1H).  $^{13}\text{C}$  NMR (151 MHz,  $\text{CDCl}_3$ ):  $\delta$  160.19, 143.34, 133.84, 132.49, 129.45, 129.41, 123.26, 121.37, 120.89, 120.57, 112.49, 110.68, 94.85, 74.07, 55.91, 26.43, 18.75, 13.38. IR (neat,  $\text{cm}^{-1}$ ): 3074.86, 3008.02, 2933.88, 2835.38, 2223.53, 2155.68, 2045.47, 1698.41, 1595.06, 1528.15, 1493.62, 1463.66, 1348.20, 1263.54, 1241.89, 1024.19, 755.31. HRMS (DART) ( $[\text{M}+\text{H}]^+$ ) Calcd. for  $\text{C}_{18}\text{H}_{16}\text{NO}_3^+$ , 294.11247, found: 294.11214. HPLC analysis: ee = 81%. IC (90% hexanes: 10% isopropanol, 1 mL/min):  $t_{\text{major}} = 17.66$  min,  $t_{\text{minor}} = 18.52$  min.

**1-(((1*R*,2*R*)-2-(3-Fluorophenyl)cyclopropyl)ethynyl)-2-methoxybenzene ((-)-3p)** Yield: 96%. dr:

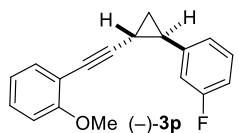

85:15.  $R_f = 0.3$  (Hexane/Ethyl Acetate: 20/1).  $[\alpha]_D^{20} = (-) -96.21^\circ$  ( $c = 0.5$ ,  $\text{CHCl}_3$ ).  $^1\text{H}$  NMR (500 MHz,  $\text{CDCl}_3$ ):  $\delta$  7.38 (dd,  $J = 7.6, 1.7$  Hz, 1H), 7.25 (ddd,  $J = 9.2, 6.4, 1.7$  Hz, 1H), 7.11 – 7.07 (m, 2H), 6.97 (ddd,  $J = 8.7, 7.8, 4.6$  Hz, 2H), 6.88 (ddd,  $J = 10.8, 8.6, 4.6$  Hz, 2H), 3.88 (s, 3H), 2.38 (ddd,  $J = 8.9, 6.0, 4.7$  Hz, 1H), 1.73 (ddd,  $J = 8.7, 5.5, 4.7$  Hz, 1H), 1.47 – 1.42 (m, 1H), 1.30 (ddd,  $J = 8.7, 6.2, 4.9$  Hz, 1H).  $^{13}\text{C}$  NMR (126 MHz,  $\text{CDCl}_3$ ):  $\delta$  161.59 (d,  $J = 244.2$  Hz), 160.15, 136.62 (d,  $J = 3.3$  Hz), 133.83, 130.06 (d,  $J = 7.8$  Hz), 129.21, 127.70 (d,  $J = 8.0$  Hz), 120.55, 115.41, 115.24, 112.84, 110.68, 95.94, 73.38, 55.91, 26.18, 18.27, 12.42.  $^{19}\text{F}$  NMR (564 MHz,  $\text{CDCl}_3$ )  $\delta$  -108.26 (s, 1F). HRMS (DART) ( $[\text{M}+\text{H}]^+$ ) Calcd. for  $\text{C}_{18}\text{H}_{16}\text{FO}^+$ : 267.11797, found: 267.11835. HPLC analysis: ee = 95%. IA (99.7% hexanes: 0.3% isopropanol, 1 mL/min):  $t_{\text{major}} = 12.10$  min,  $t_{\text{minor}} = 10.75$  min.

**1-Bromo-2-(((1*R*,2*R*)-2-((2-methoxyphenyl)ethynyl)cyclopropyl)benzene ((-)-3q)** Yield: 91%. dr:

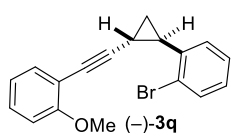

90:10.  $R_f = 0.3$  (Hexane/Ethyl Acetate: 20/1).  $[\alpha]_D^{20} = (-) -144.92^\circ$  ( $c = 0.5$ ,  $\text{CHCl}_3$ ).  $^1\text{H}$  NMR (500 MHz,  $\text{CDCl}_3$ ):  $\delta$  7.58 (dd,  $J = 7.9, 1.2$  Hz, 1H), 7.42 – 7.37 (m, 1H), 7.28 – 7.21 (m, 2H), 7.08 (td,  $J = 7.7, 1.6$  Hz, 1H), 7.00 (dd,  $J = 11.6, 5.0$  Hz, 1H), 6.88 (ddd,  $J = 12.0, 9.3, 4.7$  Hz, 2H), 3.89 (s, 3H), 2.66 – 2.60 (m, 1H), 1.83 – 1.77 (m, 1H), 1.52 (ddd,  $J = 8.9, 5.5, 4.9$  Hz, 1H), 1.33 – 1.26 (m, 1H).  $^{13}\text{C}$  NMR (151 MHz,  $\text{CDCl}_3$ ):  $\delta$  160.23, 140.05, 133.92, 132.74, 131.55, 129.19, 127.95, 127.45, 127.22, 126.33, 120.54, 110.75, 95.87, 73.44, 55.96, 27.59, 17.77, 11.44. IR (neat,  $\text{cm}^{-1}$ ): 2959.06, 1594.84, 1574.10, 1493.09, 1463.23, 1433.85,

1261.01, 1240.02, 1219.52, 1180.38, 1161.43, 1121.33, 1046.77, 1023.44. HRMS (DART) ( $[M+H]^+$ ) Calcd. for  $C_{18}H_{16}BrO^+$ : 327.03790, found: 327.03886. HPLC analysis: ee = 94%. ODH (98% hexanes: 2% isopropanol, 1 mL/min):  $t_{major}$  = 36.73 min,  $t_{minor}$  = 50.38 min.

**1-(((1R,2R)-2-(3-bromophenyl)cyclopropyl)ethynyl)-2-methoxybenzene ((-)-3r)** Yield: 88%. dr:

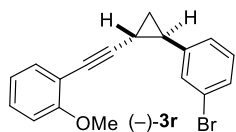

88:12.  $R_f$  = 0.3 (Hexane/Ethyl Acetate: 20/1).  $[\alpha]_D^{20}$  = (-)-151.97° ( $c$  = 0.5,  $CHCl_3$ ).  $^1H$  NMR (600 MHz,  $CDCl_3$ ):  $\delta$  7.37 (dd,  $J$  = 7.6, 1.5 Hz, 1H), 7.32 (d,  $J$  = 7.9 Hz, 1H), 7.26 – 7.21 (m, 2H), 7.14 (t,  $J$  = 7.8 Hz, 1H), 7.04 (d,  $J$  = 7.7 Hz, 1H), 6.84 – 6.70 (m, 2H), 3.88 (s, 3H), 2.39 – 2.33 (m, 1H), 1.78 – 1.75 (m, 1H), 1.47 (dt,  $J$  = 8.8, 5.3 Hz, 1H), 1.34 (ddd,  $J$  = 8.7, 6.0, 5.1 Hz, 1H).  $^{13}C$  NMR (151 MHz,  $CDCl_3$ ):  $\delta$  160.18, 143.49, 133.85, 130.05, 129.42, 129.30, 129.29, 124.88, 122.69, 120.56, 112.73, 110.68, 95.55, 73.62, 55.92, 26.48, 18.47, 12.85. IR (neat,  $cm^{-1}$ ): 3052.53, 2928.16, 2221.82, 2035.47, 1951.20, 1596.77, 1566.35, 1493.96, 1265.16, 1024.68, 895.64, 746.09. HRMS (DART) ( $[M+H]^+$ ) Calcd. for  $C_{18}H_{16}BrO^+$ : 327.03790, found: 327.03788. HPLC analysis: ee = 94%. IC (99% hexanes : 1% isopropanol, 0.8 mL/min):  $t_{major}$  = 15.05 min,  $t_{minor}$  = 35.29 min.

**1-(((1R,2R)-2-(4-bromophenyl)cyclopropyl)ethynyl)-2-methoxybenzene ((-)-3s)** Yield: 93%. dr:

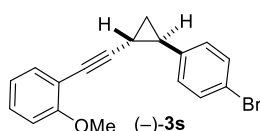

84:16.  $R_f$  = 0.3 (Hexane/Ethyl Acetate: 20/1).  $[\alpha]_D^{20}$  = (-)-177.86° ( $c$  = 0.5,  $CHCl_3$ ).  $^1H$  NMR (600 MHz,  $CDCl_3$ ):  $\delta$  7.38 (dd,  $J$  = 14.3, 4.9 Hz, 2H), 7.25 – 7.18 (m, 2H), 6.99 (d,  $J$  = 8.4 Hz, 2H), 6.88 – 6.86 (m, 2H), 3.88 (s, 3H), 2.37 – 2.33 (m, 1H), 1.77 – 1.73 (m, 1H), 1.49 – 1.45 (m, 1H), 1.33 – 1.29 (m, 1H).  $^{13}C$  NMR (151 MHz,  $CDCl_3$ ):  $\delta$  160.14, 140.11, 133.83, 131.56, 130.28, 129.27, 127.88, 120.56, 119.93, 110.67, 95.68, 73.55, 55.91, 26.38, 18.49, 12.74. IR (neat,  $cm^{-1}$ ): 2915.93, 2848.44, 2361.23, 2181.48, 1596.50, 1565.70, 1493.74, 1463.52, 1434.28, 1261.97, 1240.71, 1179.48, 1024.49, 750.67. HRMS (DART) ( $[M+H]^+$ ) Calcd. for  $C_{18}H_{16}BrO^+$ : 327.03790, found: 327.03750. HPLC analysis: ee = 91%. IA (99.7% hexanes: 0.3% isopropanol, 1 mL/min):  $t_{major}$  = 17.36 min,  $t_{minor}$  = 13.36 min.

**2-(((1R,2R)-2-((2-methoxyphenyl)ethynyl)cyclopropyl)naphthalene ((-)-3t)** Yield: 96%. dr: 92:8.

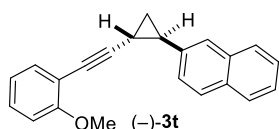

$R_f$  = 0.3 (Hexane/Ethyl Acetate: 20/1).  $[\alpha]_D^{20}$  = (-)-186.99° ( $c$  = 0.5,  $CHCl_3$ ).  $^1H$  NMR (600 MHz,  $CDCl_3$ ):  $\delta$  7.78 (dd,  $J$  = 17.6, 8.2 Hz, 3H), 7.58 (s, 1H), 7.47-7.40 (m, 3H), 7.27 – 7.24 (m, 2H), 6.91 – 6.86 (m, 2H), 3.89 (s, 3H), 2.57 (tt,  $J$  = 14.8, 7.2 Hz, 1H), 1.90 (dt,  $J$  = 8.9, 5.4 Hz, 1H), 1.54 – 1.52 (m, 1H), 1.50 – 1.46 (m, 1H).  $^{13}C$  NMR (151 MHz,  $CDCl_3$ ):  $\delta$  160.17, 138.48, 133.86, 133.57, 132.33, 129.18, 128.19, 127.75, 127.53, 126.29, 125.43, 124.82, 124.51, 120.56, 112.91, 110.68, 96.18, 73.38, 55.93, 27.16, 18.41, 12.62. IR (neat,  $cm^{-1}$ ): 3049.84, 2933.69, 2833.69, 2222.57, 1726.29, 1594.94, 1492.53, 1462.22, 1433.04, 1261.35, 1023.58, 974.27, 815.73, 750.18. HRMS (DART) ( $[M+H]^+$ ) Calcd. for  $C_{22}H_{19}O^+$ : 299.14304, found: 299.14364. HPLC analysis: ee = 99%. IC (99% hexanes : 1% isopropanol, 0.8 mL/min):  $t_{major}$  = 19.71 min,  $t_{minor}$  = 23.40 min.

**2-(((1R,2R)-2-((2-methoxyphenyl)ethynyl)cyclopropyl)thiophene ((-)-3u)** Yield: 97%. dr: 96:4.  $R_f$

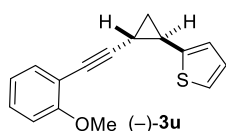

= 0.3 (Hexane/Ethyl Acetate: 20/1).  $[\alpha]_D^{20}$  = (-)-212.02° ( $c$  = 0.5,  $CHCl_3$ ).  $^1H$  NMR (600 MHz,  $CDCl_3$ ):  $\delta$  7.38 (d,  $J$  = 7.5 Hz, 1H), 7.25 (t,  $J$  = 7.9 Hz, 1H), 7.08 (d,  $J$  = 5.1 Hz, 1H), 6.91 – 6.82 (m, 4H), 3.88 (s, 3H), 2.59 – 2.55 (m, 1H), 1.83

(dt,  $J = 9.7, 5.0$  Hz, 1H), 1.49 (ddd,  $J = 9.7, 5.5, 0.7$  Hz, 1H), 1.37 – 1.33 (m, 1H).  $^{13}\text{C}$  NMR (151 MHz,  $\text{CDCl}_3$ ):  $\delta$  160.12, 145.24, 133.82, 129.24, 126.93, 123.64, 122.92, 120.53, 112.73, 110.64, 95.45, 73.78, 55.88, 22.24, 19.35, 13.44. IR (neat,  $\text{cm}^{-1}$ ): 3004.51, 2958.93, 2834.69, 2359.94, 2342.06, 1733.86, 1595.14, 1493.32, 1463.04, 1434.12, 1261.58, 1241.27, 1023.74, 752.03, 696.87. HRMS (DART) ( $[\text{M}+\text{H}]^+$ ) Calcd. for  $\text{C}_{16}\text{H}_{15}\text{OS}^+$ : 255.08381, found: 255.08346. HPLC analysis: ee = 92%. IC (99.5% hexanes: 0.5% isopropanol, 0.8 mL/min):  $t_{\text{major}} = 17.45$  min,  $t_{\text{minor}} = 28.64$  min.

**2-((1R,2R)-2-((2-Methoxyphenyl)ethynyl)cyclopropyl)pyridine ((-)-3v)** Yield: 92%. dr: 90:10.  $R_f = 0.3$  (Hexane/Ethyl Acetate: 20/1).  $[\alpha]_D^{20} = (-)-309.74^\circ$  ( $c = 0.5$ ,  $\text{CHCl}_3$ ).  $^1\text{H}$

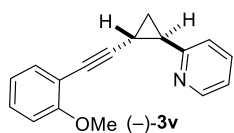

NMR (600 MHz,  $\text{CDCl}_3$ ):  $\delta$  8.43 (d,  $J = 4.6$  Hz, 1H), 7.54 (td,  $J = 7.6, 1.1$  Hz, 1H), 7.38 (d,  $J = 7.5$  Hz, 1H), 7.25 – 7.22 (m, 2H), 7.05 (dd,  $J = 7.3, 5.0$  Hz, 1H),

6.87 – 6.84 (m, 2H), 3.86 (s, 3H), 2.47 – 2.44 (m, 1H), 2.18 – 2.14 (m, 1H), 1.70 – 1.65 (m, 1H), 1.48 – 1.44 (m, 1H).  $^{13}\text{C}$  NMR (151 MHz,  $\text{CDCl}_3$ ):  $\delta$  160.13, 159.60, 149.45, 135.94, 133.84, 129.13, 122.56, 121.07, 120.50, 112.87, 110.62, 96.10, 73.16, 55.86, 28.02, 19.06, 12.94. IR (neat,  $\text{cm}^{-1}$ ): 2968.41, 2927.53, 2360.32, 1717.35, 1596.16, 1494.22, 1464.75, 1263.99, 1161.37, 1123.92, 1024.27, 950.53, 735.14. HRMS (DART) ( $[\text{M}+\text{H}]^+$ ) Calcd. for  $\text{C}_{17}\text{H}_{16}\text{NO}^+$ : 250.12264, found: 250.12161. HPLC analysis: ee = 92%. IC (99.5% hexanes: 0.5% isopropanol, 1.0 mL/min):  $t_{\text{major}} = 47.91$  min,  $t_{\text{minor}} = 62.80$  min.

**2-((1R,2R)-2-((2-Methoxyphenyl)ethynyl)cyclopropyl)benzo[b]thiophene ((-)-3w)** Yield: 90%. dr:

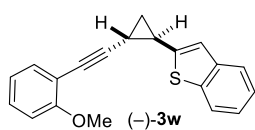

88:12.  $R_f = 0.3$  (Hexane/Ethyl Acetate: 20/1).  $[\alpha]_D^{20} = (-)-174.25^\circ$  ( $c = 0.5$ ,  $\text{CHCl}_3$ ).  $^1\text{H}$  NMR (600 MHz,  $\text{CDCl}_3$ ):  $\delta$  8.02 (d,  $J = 8.0$  Hz, 1H), 7.85 (t,  $J = 8.0$  Hz, 1H), 7.43 (dd,  $J = 7.9, 7.2$  Hz, 2H), 7.39 – 7.36 (m, 1H), 7.28 – 7.26 (m,

1H), 7.02 (s, 1H), 6.92 – 6.86 (m, 2H), 3.90 (s, 3H), 2.56 – 2.52 (m, 1H), 1.81 – 1.77 (m, 1H), 1.50 (dt,  $J = 9.6, 5.0$  Hz, 1H), 1.38 (ddd,  $J = 8.6, 6.2, 4.9$  Hz, 1H).  $^{13}\text{C}$  NMR (151 MHz,  $\text{CDCl}_3$ ):  $\delta$  160.22, 140.49, 139.61, 136.33, 133.85, 129.23, 124.71, 124.25, 122.92, 122.34, 120.91, 120.56, 112.91, 110.72, 96.10, 73.38, 55.94, 20.87, 16.42, 10.07. HRMS (DART) ( $[\text{M}+\text{H}]^+$ ) Calcd. for  $\text{C}_{20}\text{H}_{17}\text{OS}^+$ : 305.09946, found: 305.09874. HPLC analysis: ee = 93%. IC (99.5% hexanes: 0.5% isopropanol, 0.8 mL/min):  $t_{\text{major}} = 17.74$  min,  $t_{\text{minor}} = 29.07$  min.

**(1R,2R)-2-((2-Methoxyphenyl)ethynyl)cyclopropane-1-carboxamide ((-)-3x)** Yield: 92%. dr: 98:2.

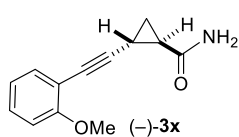

$R_f = 0.3$  (Hexane/Ethyl Acetate: 20/1).  $[\alpha]_D^{20} = (-)-96.32^\circ$  ( $c = 0.5$ ,  $\text{CHCl}_3$ ).  $^1\text{H}$  NMR (600 MHz,  $\text{CDCl}_3$ ):  $\delta$  7.31 (dd,  $J = 7.6, 1.6$  Hz, 1H), 7.22 (td,  $J = 8.4, 1.6$  Hz, 1H), 6.84 (ddd,  $J = 11.1, 8.8, 4.6$  Hz, 2H), 5.91 (s, 2H), 3.83 (s, 3H), 2.09 –

2.04 (m, 1H), 1.91 – 1.85 (m, 1H), 1.46 (ddd,  $J = 9.2, 5.3, 4.1$  Hz, 1H), 1.22 (ddd,  $J = 8.4, 6.2, 4.1$  Hz, 1H).  $^{13}\text{C}$  NMR (151 MHz,  $\text{CDCl}_3$ ):  $\delta$  173.20, 160.19, 133.89, 129.52, 120.58, 112.35, 110.68, 94.30, 73.74, 55.90, 24.57, 16.90, 10.95. IR (neat,  $\text{cm}^{-1}$ ): 2964.37, 2934.13, 2361.03, 2342.20, 2158.68, 1724.96, 1596.50, 1494.77, 1334.80, 1261.55, 1192.09, 1180.94, 1124.56, 752.96. HRMS (DART) ( $[\text{M}+\text{H}]^+$ ) Calcd. for  $\text{C}_{13}\text{H}_{14}\text{NO}_2^+$ : 216.10191, found: 216.10149. HPLC analysis: ee = 89%. IC (99% hexanes: 1% isopropanol, 0.8 mL/min):  $t_{\text{major}} = 30.75$  min,  $t_{\text{minor}} = 36.84$  min.

**Ethyl-(1*R*,2*R*)-2-((2-methoxyphenyl)ethynyl)cyclopropane-1-carboxylate ((-)-3y)** Yield: 89%. dr:

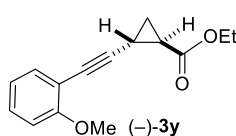

96:4.  $R_f = 0.3$  (Hexane/Ethyl Acetate: 20/1).  $[\alpha]_D^{20} = (-) -116.67^\circ$  ( $c = 0.5$ ,  $\text{CHCl}_3$ ).  $^1\text{H NMR}$  (600 MHz,  $\text{CDCl}_3$ ):  $\delta$  7.34 (dd,  $J = 7.6, 1.6$  Hz, 1H), 7.25 (dd,  $J = 12.5, 5.0$  Hz, 1H), 6.89 – 6.83 (m, 2H), 4.16 (ddd,  $J = 14.3, 7.2, 3.0$  Hz, 2H), 3.87 (s, 3H), 2.13 (ddd,  $J = 9.1, 6.2, 4.1$  Hz, 1H), 2.08 – 2.03 (m, 1H), 1.47 (ddd,  $J = 9.4, 5.5, 4.2$  Hz, 1H), 1.34 – 1.31 (m, 1H), 1.30 – 1.23 (m, 3H).  $^{13}\text{C NMR}$  (151 MHz,  $\text{CDCl}_3$ ):  $\delta$  172.51, 160.26, 133.90, 129.54, 120.54, 112.32, 110.67, 93.74, 73.97, 61.05, 55.90, 23.46, 17.44, 14.39, 11.53. IR (neat,  $\text{cm}^{-1}$ ): 2979.80, 1723.87, 1596.21, 1575.23, 1494.51, 1464.14, 1405.49, 1324.14, 1261.27, 1179.78, 1025.69. HRMS (DART) ( $[\text{M}+\text{H}]^+$ ) Calcd. for  $\text{C}_{15}\text{H}_{17}\text{O}_3^+$ : 245.11722, found: 245.11754. HPLC analysis: ee = 88%. IA (99.7% hexanes: 0.3% isopropanol, 1 mL/min):  $t_{\text{major}} = 9.47$  min,  $t_{\text{minor}} = 10.72$  min.

**1-Methoxy-2-(((1*S*,2*R*)-2-Methyl-2-(*p*-tolyl)cyclopropyl)ethynyl)benzene ((-)-3z)** Yield: 93%. dr:

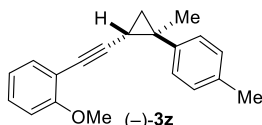

96:4.  $R_f = 0.3$  (Hexane/Ethyl Acetate: 20/1).  $[\alpha]_D^{20} = (-) -240.41^\circ$  ( $c = 0.5$ ,  $\text{CHCl}_3$ ).  $^1\text{H NMR}$  (500 MHz,  $\text{CDCl}_3$ ):  $\delta$  7.42 (d,  $J = 7.5$  Hz, 1H), 7.25 (dd,  $J = 18.3, 7.9$  Hz, 3H), 7.13 (d,  $J = 8.0$  Hz, 2H), 6.89 (dd,  $J = 17.1, 8.1$  Hz, 2H), 3.90 (s, 3H), 2.34 (s, 3H), 1.88 (dd,  $J = 8.9, 5.6$  Hz, 1H), 1.65 (s, 3H), 1.48 (dd,  $J = 8.7, 4.2$  Hz, 1H), 1.07 (t,  $J = 5.0$  Hz, 1H).  $^{13}\text{C NMR}$  (126 MHz,  $\text{CDCl}_3$ ):  $\delta$  160.19, 142.99, 135.91, 133.66, 129.17, 128.92, 127.35, 120.51, 113.36, 110.72, 94.98, 75.40, 55.91, 27.92, 23.64, 22.78, 21.11, 16.45. IR (neat,  $\text{cm}^{-1}$ ): 2959.00, 2916.52, 2848.85, 2224.98, 1595.39, 1574.37, 1516.57, 1493.90, 1463.28, 1434.04, 1262.63, 1240.08, 1161.60, 1121.96, 1025.38. HRMS (DART) ( $[\text{M}+\text{H}]^+$ ) Calcd. for  $\text{C}_{20}\text{H}_{21}\text{O}^+$ : 277.15869, found: 277.15930. HPLC analysis: ee = 94%. IC (99.5% hexanes: 0.5% isopropanol, 0.8 mL/min):  $t_{\text{major}} = 14.22$  min,  $t_{\text{minor}} = 16.97$  min.

**1-(((1*S*,2*S*)-2-Bromo-2-phenylcyclopropyl)ethynyl)-2-methoxybenzene ((-)-3aa)** Yield: 91%. dr:

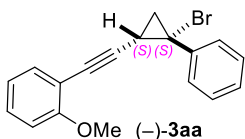

97:3.  $R_f = 0.3$  (Hexane/Ethyl Acetate: 20/1).  $[\alpha]_D^{20} = (-) -240.41^\circ$  ( $c = 0.5$ ,  $\text{CHCl}_3$ ).  $^1\text{H NMR}$  (600 MHz,  $\text{CDCl}_3$ ):  $\delta$  7.53 – 7.50 (m, 3H), 7.34 (t,  $J = 7.5$  Hz, 2H), 7.28 (dd,  $J = 11.1, 4.3$  Hz, 2H), 6.93 – 6.87 (m, 2H), 3.91 (s, 3H), 2.13 (dd,  $J = 9.7, 6.8$  Hz, 1H), 1.91 (dd,  $J = 9.7, 6.0$  Hz, 1H), 1.75 (t,  $J = 6.4$  Hz, 1H).  $^{13}\text{C NMR}$  (151 MHz,  $\text{CDCl}_3$ ):  $\delta$  160.30, 142.92, 134.16, 129.51, 128.79, 128.76, 128.49, 120.60, 112.67, 110.82, 93.10, 77.24, 56.03, 39.46, 25.96, 17.92. IR (neat,  $\text{cm}^{-1}$ ): 259.61, 2925.60, 2359.96, 2341.91, 2158.64, 2006.36, 1724.59, 1597.77, 1494.16, 1463.91, 1258.03, 1180.03, 1121.41, 1025.10, 752.20, 697.42. HRMS (DART) ( $[\text{M}+\text{H}]^+$ ) Calcd. for  $\text{C}_{18}\text{H}_{16}\text{OBr}^+$ : 327.03790, found: 327.03766. HPLC analysis: ee = 91%. IA (99.5% hexanes: 0.5% isopropanol, 0.8 mL/min):  $t_{\text{major}} = 18.84$  min,  $t_{\text{minor}} = 17.84$  min.

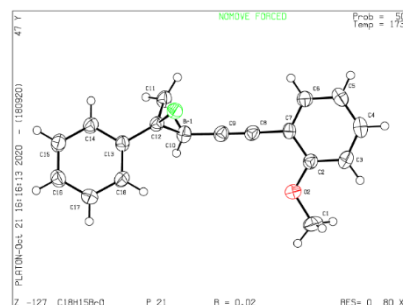

**1-Methoxy-2-(((1*R*,2*R*)-2-((*E*)-1-phenylprop-1-en-2-yl)cyclopropyl)ethynyl)benzene ((-)-3ab)**

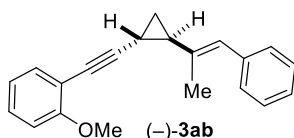

Yield: 79%. dr: 85:15.  $R_f = 0.3$  (Hexane/Ethyl Acetate: 20/1).  $[\alpha]_D^{20} = (-) -62.99^\circ$  ( $c = 0.5$ ,  $\text{CHCl}_3$ ).  $^1\text{H NMR}$  (600 MHz,  $\text{CDCl}_3$ ):  $\delta$  7.38 (dd,  $J = 7.5, 1.5$  Hz, 1H), 7.32 (t,  $J = 7.6$  Hz, 2H), 7.24 – 7.18 (m, 4H), 6.89 – 6.84 (m,



2H), 6.39 (s, 1H), 3.89 (s, 3H), 2.08 – 2.05 (m, 1H), 1.78 (s, 1H), 1.72 (dt,  $J = 8.8, 5.2$  Hz, 1H), 1.23 – 1.19 (m, 1H).  $^{13}\text{C}$  NMR (151 MHz,  $\text{CDCl}_3$ ):  $\delta$  160.13, 138.16, 136.81, 133.83, 129.08, 128.98, 128.22, 126.22, 125.30, 120.54, 113.00, 110.65, 96.66, 72.97, 55.94, 31.41, 15.73, 15.33, 8.52. IR (neat,  $\text{cm}^{-1}$ ): 3444.24, 2925.13, 2360.20, 2341.42, 2204.65, 2158.56, 1717.77, 1596.20, 1493.40, 1456.63, 1260.50, 1023.79, 752.82. HRMS (DART) ( $[\text{M}+\text{H}]^+$ ) Calcd. for  $\text{C}_{21}\text{H}_{21}\text{O}^+$ : 289.15869, found: 289.15712. HPLC analysis: ee = 93%. IB (99.5% hexanes: 0.5% isopropanol, 0.8 mL/min):  $t_{\text{major}} = 34.07$  min,  $t_{\text{minor}} = 22.47$  min.

**1-Methoxy-2-(((1R,2R)-2-(phenylethynyl)cyclopropyl)ethynyl)benzene ((-)-3ac)** Yield: 93%. dr:

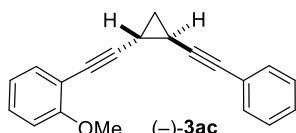

97:3.  $R_f = 0.3$  (Hexane/Ethyl Acetate: 20/1).  $[\alpha]_D^{20} = (-) -108.98^\circ$  ( $c = 0.5$ ,  $\text{CHCl}_3$ ).  $^1\text{H}$  NMR (600 MHz,  $\text{CDCl}_3$ ):  $\delta$  7.37 (ddd,  $J = 8.9, 7.4, 2.5$  Hz, 3H), 7.28 – 7.24 (m, 4H), 6.87 (dd,  $J = 13.0, 5.4$  Hz, 2H), 3.88 (s, 3H), 1.99 – 1.91 (m, 2H), 1.37 – 1.30 (m, 2H).  $^{13}\text{C}$  NMR (151 MHz,  $\text{CDCl}_3$ ):  $\delta$  160.26, 133.90, 131.82, 129.42, 128.36, 127.95, 123.54, 120.55, 112.56, 110.69, 94.49, 90.55, 77.88, 74.06, 55.92, 18.62, 12.08, 11.88. IR (neat,  $\text{cm}^{-1}$ ): 3009.91, 2922.50, 2834.60, 2229.39, 1722.14, 1595.33, 1573.80, 1492.27, 1463.11, 1433.89, 1264.86, 1024.60, 963.79, 756.20, 692.56. HRMS (DART) ( $[\text{M}+\text{H}]^+$ ) Calcd. for  $\text{C}_{20}\text{H}_{17}\text{O}^+$ : 273.12739, found: 273.12716. HPLC analysis: ee = 93%. IC (99% hexanes: 1% isopropanol, 0.8 mL/min):  $t_{\text{major}} = 7.83$  min,  $t_{\text{minor}} = 10.68$  min.

**(1R,2R)-1,2-Bis((2-methoxyphenyl)ethynyl)cyclopropane ((-)-3ad)** Yield: 93%. dr: 91:9.  $R_f = 0.3$

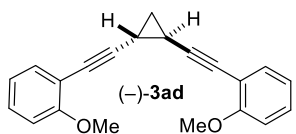

(Hexane/Ethyl Acetate: 7/1).  $[\alpha]_D^{20} = (-) -177.5^\circ$  ( $c = 0.5$ ,  $\text{CHCl}_3$ ).  $^1\text{H}$  NMR (600 MHz,  $\text{CDCl}_3$ ):  $\delta$  7.35 (dd,  $J = 7.6, 1.7$  Hz, 2H), 7.25 (ddd,  $J = 9.2, 5.7, 1.8$  Hz, 2H), 6.89 – 6.83 (m, 4H), 3.87 (s, 6H), 2.02 – 1.97 (m, 2H), 1.37 – 1.33 (m, 2H).  $^{13}\text{C}$  NMR (151 MHz,  $\text{CDCl}_3$ ):  $\delta$  160.26, 133.90, 129.36, 120.54, 112.63, 110.69, 94.66, 73.98, 55.91, 18.79, 12.25. IR (neat,  $\text{cm}^{-1}$ ): 3006.54, 2959.73, 2835.23, 2232.65, 1731.22, 1595.29, 1574.14, 1493.23, 1463.39, 1434.14, 1361.97, 1278.67, 1260.77, 1241.06, 1181.03, 1161.99, 1119.91, 1047.91, 1024.30, 935.74, 907.42, 826.31, 751.48. HRMS (DART) ( $[\text{M}+\text{H}]^+$ ) Calcd. for  $\text{C}_{21}\text{H}_{19}\text{O}_2^+$ : 303.13796, found: 303.13921. HPLC analysis: ee = 95%. IA (99.5% hexanes: 0.5% isopropanol, 1 mL/min):  $t_{\text{major}} = 12.22$  min,  $t_{\text{minor}} = 17.06$  min.

**1-(((1R,2R)-2-Butylcyclopropyl)ethynyl)-2-methoxybenzene ((-)-3ae)** Yield: 32%. dr: 86:14.  $R_f =$

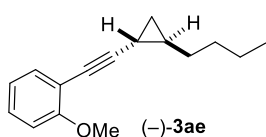

0.3 (Hexane/Ethyl Acetate: 20/1).  $[\alpha]_D^{20} = (-) -82.6^\circ$  ( $c = 0.5$ ,  $\text{CHCl}_3$ ).  $^1\text{H}$  NMR (600 MHz,  $\text{CDCl}_3$ ):  $\delta$  7.33 (dd,  $J = 7.6, 1.4$  Hz, 1H), 7.21 (ddd,  $J = 8.3, 7.6, 1.7$  Hz, 1H), 6.85 (ddt,  $J = 13.1, 8.3, 2.6$  Hz, 3H), 3.85 (s, 4H), 1.63 – 1.57 (m, 2H), 1.56 – 1.49 (m, 4H), 1.46 – 1.34 (m, 5H), 1.09 – 0.97 (m, 3H), 0.91 (dd,  $J = 13.5, 6.3$  Hz, 4H), 0.49 (dt,  $J = 9.9, 5.1$  Hz, 1H).  $^{13}\text{C}$  NMR (151 MHz,  $\text{CDCl}_3$ ):  $\delta$  160.21, 133.67, 128.74, 120.46, 113.56, 110.66, 95.62, 73.89, 55.87, 31.61, 30.04, 22.79, 19.25, 15.37, 14.31, 6.55. IR (neat,  $\text{cm}^{-1}$ ): 2956.71, 2927.35, 2855.58, 2225.08, 1595.37, 1493.72, 1463.69, 1262.53, 1240.39, 1122.15, 1026.59. HRMS (DART) ( $[\text{M}+\text{H}]^+$ ) Calcd. for  $\text{C}_{16}\text{H}_{21}\text{O}^+$ : 229.15869, found: 229.15926. HPLC analysis: ee = 81%. IF (99.7% hexanes: 0.3% isopropanol, 0.8 mL/min):  $t_{\text{major}} = 19.15$  min,  $t_{\text{minor}} = 18.58$  min.

**1-(((1*R*,2*R*)-2-Butylcyclopropyl)ethynyl)-2-methoxybenzene ((-)-**3af**)** Yield: 40%. dr: 89:11.  $R_f =$

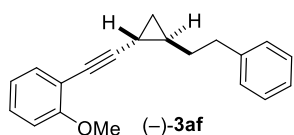

0.3 (Hexane/Ethyl Acetate: 15:1).  $[\alpha]_D^{20} = (-)-101.34^\circ$  ( $c = 0.5$ ,  $\text{CHCl}_3$ ).  $^1\text{H}$

NMR (500 MHz,  $\text{CDCl}_3$ ):  $\delta$  7.35 (dd,  $J = 7.5, 1.4$  Hz, 1H), 7.30 – 7.14 (m,

6H), 6.85 (dd,  $J = 16.8, 8.1$  Hz, 2H), 3.80 (s, 3H), 2.97 – 2.87 (m, 1H), 2.77

(ddd,  $J = 13.6, 9.3, 6.6$  Hz, 1H), 1.98 – 1.82 (m, 2H), 1.69 – 1.61 (m, 1H), 1.11 (dd,  $J = 14.1, 6.3$  Hz,

1H), 1.04 (td,  $J = 8.3, 4.3$  Hz, 1H), 0.55 (dd,  $J = 10.2, 5.4$  Hz, 1H).  $^{13}\text{C}$  NMR (126 MHz,  $\text{CDCl}_3$ ):  $\delta$

160.27, 142.74, 133.66, 128.84, 128.69, 128.56, 128.35, 125.75, 120.46, 110.62, 95.23, 74.12, 55.79,

35.62, 32.51, 18.83, 15.39, 6.59. IR (neat,  $\text{cm}^{-1}$ ): 3025.09, 2923.97, 2333.48, 2032.88, 2005.85,

1595.32, 1493.34, 1453.99, 1241.32, 1116.57, 1026.87. HRMS (DART) ( $[\text{M}+\text{H}]^+$ ) Calcd. for

$\text{C}_{20}\text{H}_{21}\text{O}^+$ : 277.15869, found: 277.15789. HPLC analysis: ee = 85%. IF (99.9% hexanes: 0.1%

isopropanol, 1 mL/min):  $t_{\text{major}} = 14.51$  min,  $t_{\text{minor}} = 15.37$  min.

## 6. Mechanistic Studies of Stepwise Radical Mechanism

### 6.1. Characterization of $\alpha$ -Co(III)-Propargyl Radical and $\gamma$ -Co(III)-Allenyl Radical Intermediates by EPR

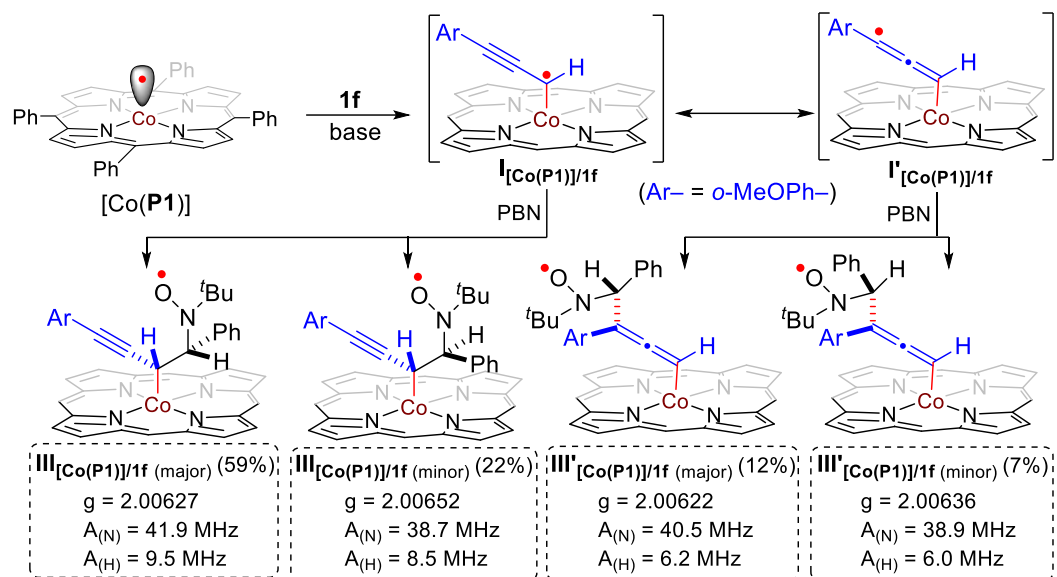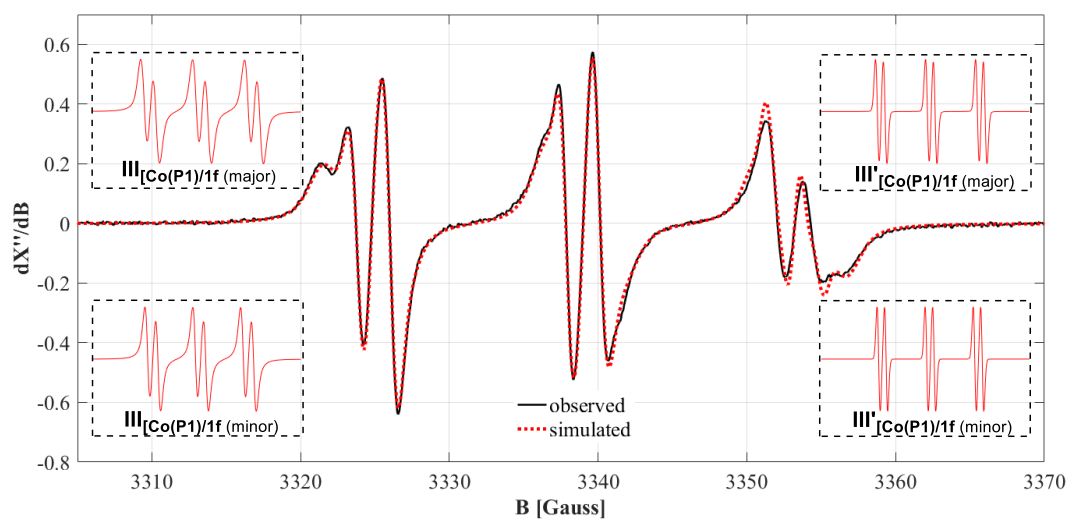

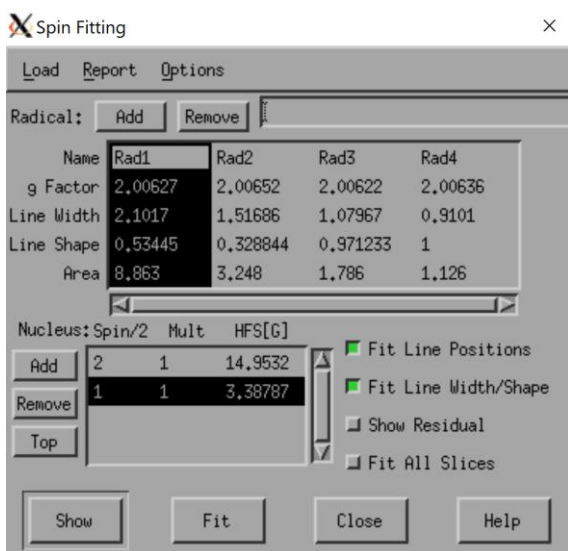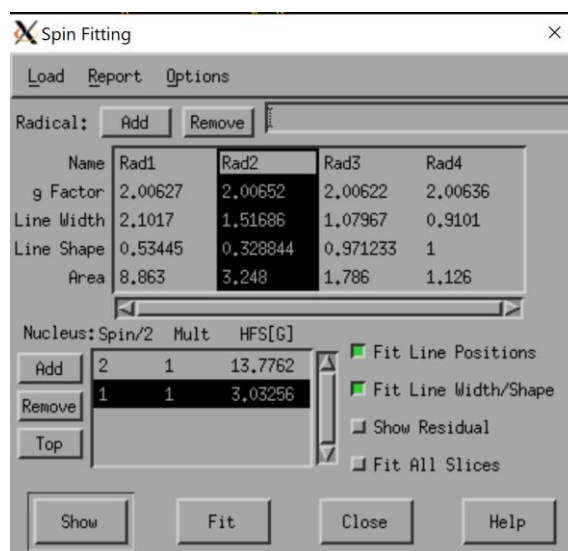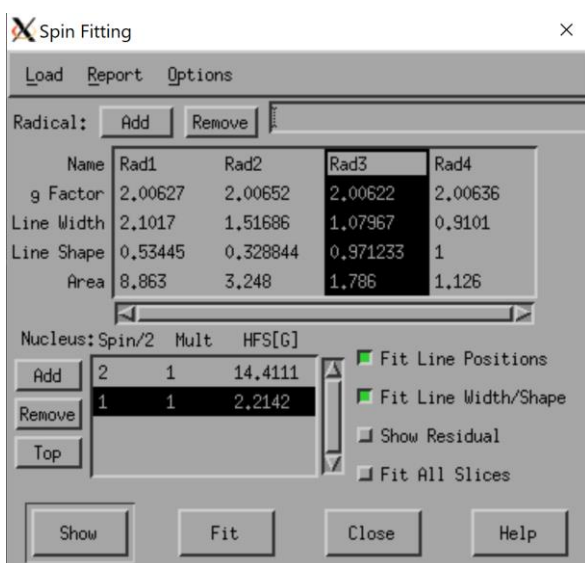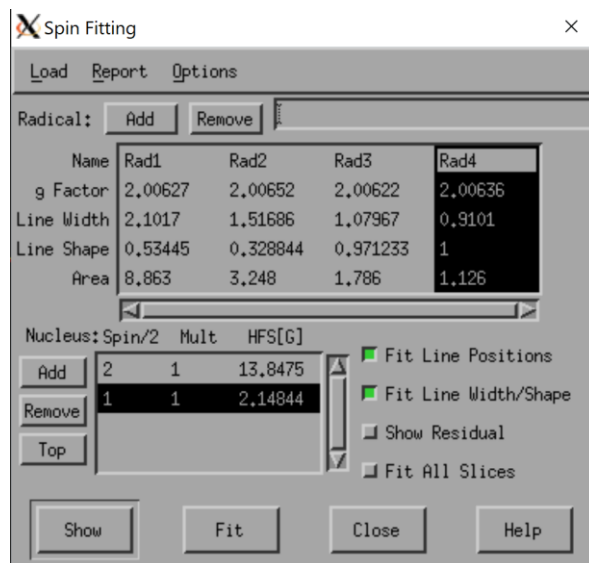

The resulting notable EPR signal (in black) has been simulated (in red) for:

**III**[Co(P1)]/1f (major) with  $g = 2.00627$ ,  $A_{(N)} = 41.9$  MHz,  $A_{(H)} = 9.5$  MHz;

**III**[Co(P1)]/1f (minor) with  $g = 2.00652$ ,  $A_{(N)} = 38.7$  MHz,  $A_{(H)} = 8.5$  MHz;

**III'**[Co(P1)]/1f (major) with  $g = 2.00622$ ,  $A_{(N)} = 40.5$  MHz,  $A_{(H)} = 6.2$  MHz;

**III'**[Co(P1)]/1f (minor) with  $g = 2.00636$ ,  $A_{(N)} = 38.9$  MHz,  $A_{(H)} = 6.0$  MHz.

*[The simulation of the EPR spectrum was performed by iteration of the isotopic g-values and line widths using the EPR simulation program SpinFit Xenon]*

**Supplemental Experimental Procedure for EPR Experiment:** A 10 mL oven-dried Schlenk tube was charged with *N*-sulfonyl hydrazone **1f** (0.10 mmol, 1.0 equiv), [Co(TPP)] (2 mol %) and PBN (0.12 mmol, 1.2 equiv). The Schlenk tube was capped with a Teflon screw cap, evacuated and backfilled with nitrogen 3 times. Under nitrogen atmosphere, Et<sub>3</sub>N (0.20 mmol, 2.0 equiv) and anhydrous benzene (1.0 mL) were added via a syringe. The reaction mixture was stirred at 60 °C for 10 min. The reaction mixture was then transferred into a degassed EPR tube (filled with argon) through a syringe. The sample was then carried out for EPR experiment at room temperature.

## EPR Simulation Details:

For **III**<sub>[Co(P1)]/1f</sub>:

Major diastereomer (59%)

$$g = 2.00627$$

$$A_{(N)} = 14.9532 \times 2.00627 \times 1.399611451 = 41.9 \text{ MHz}$$

$$A_{(H)} = 3.38787 \times 2.00627 \times 1.399611451 = 9.5 \text{ MHz}$$

Minor diastereomer: (22%)

$$g = 2.00652$$

$$A_{(N)} = 13.7762 \times 2.00652 \times 1.399611451 = 38.7 \text{ MHz}$$

$$A_{(H)} = 3.03256 \times 2.00652 \times 1.399611451 = 8.5 \text{ MHz}$$

For **III'**<sub>[Co(TPP)]/1f</sub>:

Major diastereomer: (12%)

$$g = 2.00622$$

$$A_{(N)} = 14.4111 \times 2.00622 \times 1.399611451 = 40.5 \text{ MHz}$$

$$A_{(H)} = 2.21420 \times 2.00622 \times 1.399611451 = 6.2 \text{ MHz}$$

Minor diastereomer: (7%)

$$g = 2.00636$$

$$A_{(N)} = 13.8475 \times 2.00636 \times 1.399611451 = 38.9 \text{ MHz}$$

$$A_{(H)} = 2.14844 \times 2.00636 \times 1.399611451 = 6.0 \text{ MHz}$$

## 6.2. TEMPO Trapping Experiments

An oven-dried Schlenk tube was charged with sulfonyl hydrazone **1** (0.10 mmol, 1.0 equiv), [Co(**P1**)] (2 mol %) and KH (0.40 mmol, 4.0 equiv). The Schlenk tube was capped with a Teflon screw cap, evacuated and backfilled with nitrogen 3 times. Under nitrogen atmosphere, TEMPO (0.60 mmol, 6.0 equiv) and anhydrous ethyl acetate (0.6 mL) were added. The Schlenk tube was then purged with nitrogen for 1 min and sealed with the Teflon screw cap. The reaction mixture was stirred at 22 °C for

24 h. Following completion of the reaction, the reaction mixture was filtered through a pad of silica gel, concentrated under vacuum and purified by flash column chromatography.

**1,1'-((3-(2-Methoxyphenyl)prop-2-yne-1,1-diyl)bis(oxy))bis(2,2,6,6-tetramethylpiperidine) (4f)**

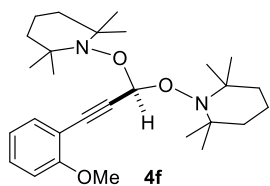

Yield: 40%.  $R_f = 0.3$  (Hexane/Ethyl Acetate: 10/1).  $^1\text{H NMR}$  (600 MHz,  $\text{CDCl}_3$ ):  $\delta$  7.40 (dd,  $J = 7.5, 1.7$  Hz, 1H), 7.29 – 7.24 (m, 1H), 6.93 – 6.80 (m, 2H), 6.00 (s, 1H), 3.84 (s, 3H), 1.54 – 1.47 (m, 8H), 1.40 – 1.24 (m, 16H), 1.14 (d,  $J = 6.9$  Hz, 12H).  $^{13}\text{C NMR}$  (151 MHz,  $\text{CDCl}_3$ ):  $\delta$  132.15, 131.98, 128.52, 118.70, 111.57, 106.14, 91.61, 87.42, 60.12, 40.35, 40.25, 33.41, 33.35, 20.91, 17.38. IR (neat,  $\text{cm}^{-1}$ ): 2930.21, 2362.19, 1596.22, 1493.89, 1464.28, 1376.14, 1361.67, 1326.42, 1292.09, 1261.43, 1181.67, 1132.22, 1046.59, 1027.98, 946.38, 749.46. HRMS (DART) ( $[\text{M}+\text{H}]^+$ ) Calcd. for  $\text{C}_{28}\text{H}_{45}\text{N}_2\text{O}_3^+$ : 457.34247, found: 457.34047.

**1,1'-((3-(2-Methoxyphenyl)prop-2-yne-1,1-diyl)bis(oxy))bis(2,2,6,6-tetramethylpiperidine) (4g)**

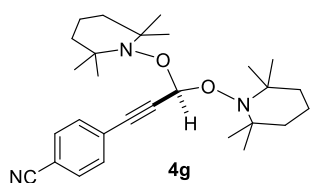

Yield: 46%.  $R_f = 0.3$  (Hexane/Ethyl Acetate: 10/1).  $^1\text{H NMR}$  (500 MHz,  $\text{CDCl}_3$ ):  $\delta$  7.65 – 7.59 (m, 2H), 7.54 – 7.49 (m, 2H), 5.98 (s, 1H), 1.50 – 1.44 (m, 6H), 1.34 – 1.25 (m, 18H), 1.14 (s, 12H).  $^{13}\text{C NMR}$  (126 MHz,  $\text{CDCl}_3$ ):  $\delta$  132.16, 131.99, 128.53, 118.70, 111.59, 106.16, 91.64, 87.44, 60.12, 40.37, 40.28, 33.42, 33.36, 20.92, 17.40. IR (neat,  $\text{cm}^{-1}$ ): 2928.93, 2871.34, 2228.55, 1977.59, 1603.99, 1500.27, 1464.91, 1376.67, 1362.39, 1326.60, 1219.31, 1180.12, 1132.51. HRMS (DART) ( $[\text{M}+\text{H}]^+$ ) Calcd. for  $\text{C}_{28}\text{H}_{42}\text{N}_3\text{O}_2^+$ : 452.32715, found: 452.32842.

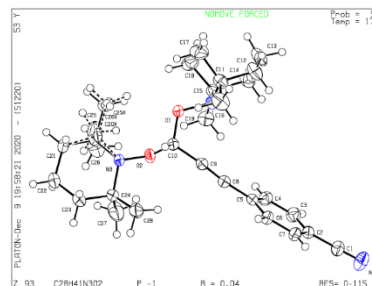

## 7. Further Transformations of Alkynyl-Substituted Cyclopropanes

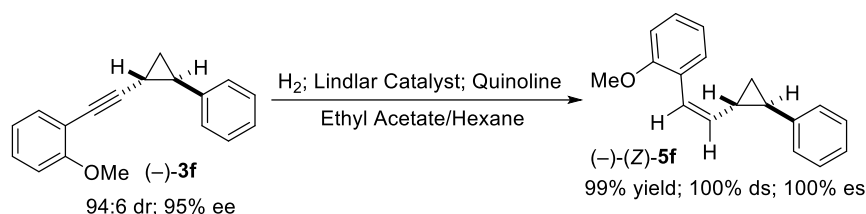

A round bottomed flask was charged with alkyne cyclopropane **3f** (0.1 mmol, 1.0 equiv), Lindlar Catalyst (0.12 mmol, 1.2 equiv), quinoline (0.2 mmol, 2.0 equiv), anhydrous hexane (1.0 mL) and anhydrous ethyl acetate (1.0 mL). The flask then was bubbled with hydrogen for 2 h. The mixture was then stirred at room temperature in hydrogen atmosphere. After 10 h, the reaction mixture was concentrated and purified by flash chromatography. The fractions containing product were collected and concentrated by rotary evaporation to afford the compound **5f**.

**1-Methoxy-2-((Z)-2-((1R,2S)-2-phenylcyclopropyl)vinyl)benzene** ((-)-(Z)-**5f**) Yield: 99%. dr: 94:6.

$R_f = 0.3$  (Hexane/Ethyl Acetate: 15/1).  $[\alpha]_D^{20} = (-) -92.33^\circ$  ( $c = 0.5$ ,  $\text{CHCl}_3$ ).  $^1\text{H}$  NMR (500 MHz,  $\text{CDCl}_3$ ):  $\delta$  7.40 (dd,  $J = 7.4, 1.6$  Hz, 1H), 7.28 – 7.24 (m, 2H), 7.23 – 7.19 (m, 1H), 7.18 – 7.14 (m, 1H), 7.07 (dd,  $J = 8.0, 1.0$  Hz, 2H), 6.86 (t,  $J = 8.3$  Hz, 2H), 6.55 (d,  $J = 11.4$  Hz, 1H), 5.32 (dd,  $J = 11.4, 9.5$  Hz, 1H), 3.80 (s, 3H), 2.11 – 2.03 (m, 2H), 1.28 (ddd,  $J = 8.5, 5.7, 5.0$  Hz, 1H), 1.19 – 1.14 (m, 1H).  $^{13}\text{C}$  NMR (126 MHz,  $\text{CDCl}_3$ ):  $\delta$  157.05, 142.18, 134.95, 130.19, 129.27, 128.43, 128.14, 125.88, 125.70, 123.43, 120.23, 110.49, 55.49, 26.14, 24.19, 18.17. IR (neat,  $\text{cm}^{-1}$ ): 3025.74, 3000.38, 2956.38, 2833.56, 1597.39, 1488.04, 1461.62, 1435.77, 1289.31, 1240.61, 1174.08, 1107.72, 1028.08. HRMS (DART) ( $[\text{M}+\text{H}]^+$ ) Calcd. for  $\text{C}_{18}\text{H}_{19}\text{O}^+$ : 251.14304, found: 251.14301. HPLC analysis: ee = 95%. IB (100% hexanes, 1 mL/min):  $t_{\text{major}} = 22.58$  min,  $t_{\text{minor}} = 16.67$  min.

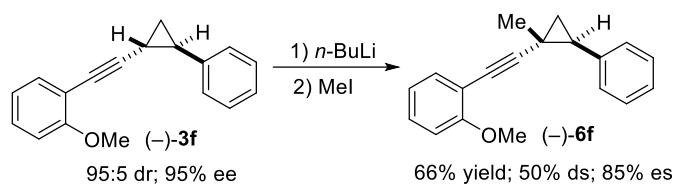

A 10 mL oven-dried Schlenk tube was capped with a Teflon screw cap, evacuated and backfilled with nitrogen 3 times. Under nitrogen atmosphere, solution of alkyne cyclopropane **3f** (0.10 mmol, 1.0 equiv) in anhydrous THF (2.0 mL) was added followed by the addition of  $n\text{-BuLi}$  (0.16 mmol, 1.6 M in hexanes, 1.6 equiv) at  $-78^\circ\text{C}$ . After being warmed up naturally and stirred at  $22^\circ\text{C}$  for 1 h, methyl iodide (0.16 mmol, 1.6 equiv) was added. The reaction mixture was stirred at  $22^\circ\text{C}$  for 24 h. Following completion of the reaction, the reaction mixture was quenched with saturated aqueous solution of  $\text{NH}_4\text{Cl}$ , extracted with ether, drying over anhydrous  $\text{MgSO}_4$ , concentrated under vacuum and purified by flash column chromatography to afford the compound **6f**.<sup>2</sup>

**1-Methoxy-2-(((1S,2R)-1-methyl-2-phenylcyclopropyl)ethynyl)benzene ((-)-6f)** Yield: 66%. dr:

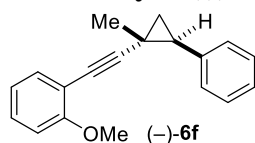

72:28.  $R_f = 0.3$  (Hexane/Ethyl Acetate: 10/1).  $[\alpha]_D^{20} = (-)-133.98^\circ$  ( $c = 0.5$ ,  $\text{CHCl}_3$ ).  $^1\text{H NMR}$  (500 MHz,  $\text{CDCl}_3$ ):  $\delta$  7.35 – 7.28 (m, 4H), 7.01 (dd,  $J = 7.7$ , 1.7 Hz, 1H), 6.89 (ddd,  $J = 12.6$ , 9.6, 4.6 Hz, 1H), 6.77 (ddd,  $J = 6.7$ , 3.3, 2.5

Hz, 2H), 3.78 (s, 3H), 2.18 (dd,  $J = 8.5$ , 6.7 Hz, 1H), 1.57 (s, 3H), 1.50 (dd,  $J = 6.6$ , 5.1 Hz, 1H), 1.28 (dd,  $J = 8.5$ , 5.0 Hz, 1H).  $^{13}\text{C NMR}$  (126 MHz,  $\text{CDCl}_3$ ):  $\delta$  159.97, 138.97, 133.72, 129.39, 128.36, 127.81, 126.07, 120.35, 113.23, 110.69, 96.88, 76.42, 55.84, 32.79, 25.74, 23.29, 17.97. IR (neat,  $\text{cm}^{-1}$ ): 2960.12, 2930.36, 2344.24, 2222.81, 1737.47, 1595.78, 1574.03, 1494.12, 1433.30, 1365.31, 1275.51, 1249.43, 1114.76, 1025.64 HRMS (DART) ( $[\text{M}+\text{H}]^+$ ) Calcd. for  $\text{C}_{19}\text{H}_{19}\text{O}^+$ : 263.14304, found: 263.14337. HPLC analysis: ee = 81%. ODH (99.7% hexanes : 0.3% isopropanol, 1 mL/min):  $t_{\text{major}} = 14.79$  min,  $t_{\text{minor}} = 9.53$  min.

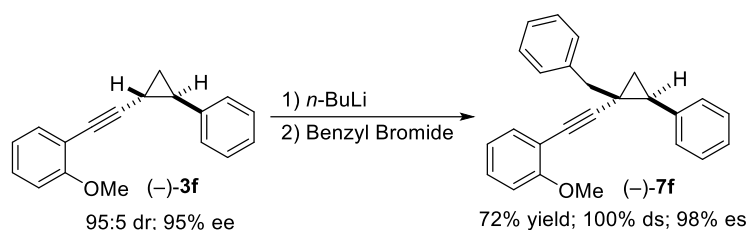

A 10 mL oven-dried Schlenk tube was capped with a Teflon screw cap, evacuated and backfilled with nitrogen 3 times. Under nitrogen atmosphere, solution of alkynylcyclopropane **3f** (0.10 mmol, 1.0 equiv) in anhydrous THF (2.0 mL) was added followed by the addition of *n*-BuLi (0.16 mmol, 1.6 M in hexanes, 1.6 equiv) at  $-78^\circ\text{C}$ . After being warmed up naturally and stirred at  $22^\circ\text{C}$  for 1 h, benzyl bromide (0.16 mmol, 1.6 equiv) was added. The reaction mixture was stirred at  $22^\circ\text{C}$  for 24 h. Following completion of the reaction, the reaction mixture was quenched with saturated aqueous solution of  $\text{NH}_4\text{Cl}$ , extracted with ether, drying over anhydrous  $\text{MgSO}_4$ , concentrated under vacuum and purified by flash column chromatography to afford the compound **7f**.<sup>2</sup>

**1-(((1R,2R)-1-Benzyl-2-phenylcyclopropyl)ethynyl)-2-methoxybenzene ((-)-7f)** Yield: 72%. dr:

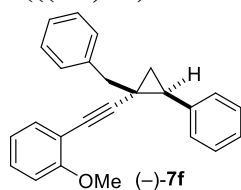

94:6.  $R_f = 0.3$  (Hexane/Ethyl Acetate: 10/1).  $[\alpha]_D^{20} = (-)-121.93^\circ$  ( $c = 0.5$ ,  $\text{CHCl}_3$ ).  $^1\text{H NMR}$  (600 MHz,  $\text{CDCl}_3$ ):  $\delta$  7.49 (d,  $J = 7.4$  Hz, 2H), 7.37 (t,  $J = 7.5$  Hz, 2H), 7.31 (dd,  $J = 10.9$ , 5.8 Hz, 4H), 7.28 – 7.21 (m, 2H), 7.17 (t,  $J = 7.9$  Hz, 1H), 7.00 – 6.97 (m, 1H), 6.78 (dd,  $J = 7.3$ , 6.5 Hz, 2H), 3.78 (s, 3H), 3.05 (s,

2H), 2.42 – 2.36 (m, 1H), 1.59 – 1.55 (m, 1H), 1.47 (dd,  $J = 8.7$ , 5.2 Hz, 1H).  $^{13}\text{C NMR}$  (151 MHz,  $\text{CDCl}_3$ ):  $\delta$  162.62, 141.88, 141.11, 135.98, 132.16, 131.25, 131.04, 130.78, 130.35, 129.07, 128.71, 122.84, 115.86, 113.29, 98.25, 80.81, 58.32, 47.32, 34.09, 26.39, 24.27. IR (neat,  $\text{cm}^{-1}$ ): 3060.24, 3026.95, 2932.32, 2224.94, 1715.68, 1595.77, 1493.83, 1453.91, 1433.20, 1250.54, 1113.19, 1027.36. HRMS (DART) ( $[\text{M}+\text{H}]^+$ ) Calcd. for  $\text{C}_{25}\text{H}_{23}\text{O}^+$ : 339.17434, found: 339.17432. HPLC analysis: ee = 93%. IA (99.5% hexanes: 0.5% isopropanol, 0.5 mL/min):  $t_{\text{major}} = 11.80$  min,  $t_{\text{minor}} = 12.85$  min.



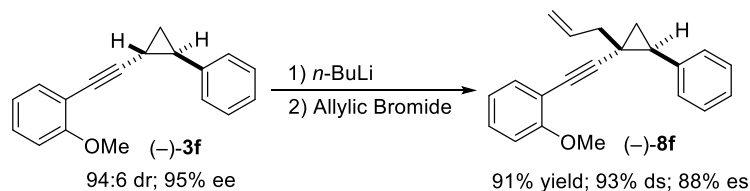

A 10 mL oven-dried Schlenk tube was capped with a Teflon screw cap, evacuated and backfilled with nitrogen 3 times. Under nitrogen atmosphere, solution of alkyne cyclopropane **3f** (0.10 mmol, 1.0 equiv) in anhydrous THF (2.0 mL) was added followed by the addition of *n*-BuLi (0.16 mmol, 1.6 M in hexanes, 1.6 equiv) at  $-78^\circ\text{C}$ . After being warmed up naturally and stirred at  $22^\circ\text{C}$  for 1 h, allylic bromide (0.16 mmol, 1.6 equiv) was added. The reaction mixture was stirred at  $22^\circ\text{C}$  for 24 h. Following completion of the reaction, the reaction mixture was quenched with saturated aqueous solution of  $\text{NH}_4\text{Cl}$ , extracted with ether, drying over anhydrous  $\text{MgSO}_4$ , concentrated under vacuum and purified by flash column chromatography to afford the compound **8f**.<sup>2</sup>

**1-(((1S,2R)-1-Allyl-2-phenylcyclopropyl)ethynyl)-2-methoxybenzene ((-)-8f)** Yield: 91%. dr: 91:9.

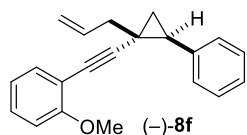

$R_f = 0.3$  (Hexane/Ethyl Acetate: 10/1).  $[\alpha]_D^{20} = (-)-83.28^\circ$  ( $c = 0.5$ ,  $\text{CHCl}_3$ ).  $^1\text{H}$  NMR (500 MHz,  $\text{CDCl}_3$ ):  $\delta$  7.30 (dt,  $J = 13.2, 7.5$  Hz, 4H), 7.21 – 7.12 (m, 2H), 7.00 – 6.96 (m, 1H), 6.77 – 6.70 (m, 2H), 6.07 (ddt,  $J = 17.0, 10.2, 6.8$  Hz, 1H), 5.16 (ddd,  $J = 13.6, 11.0, 1.2$  Hz, 2H), 3.75 (s, 3H), 2.42 (ddd,  $J = 81.5, 14.4, 6.8$  Hz, 2H), 2.21 (dd,  $J = 8.5, 6.9$  Hz, 1H), 1.49 (dd,  $J = 6.6, 5.3$  Hz, 1H), 1.32 (dd,  $J = 8.7, 5.1$  Hz, 1H).  $^{13}\text{C}$  NMR (126 MHz,  $\text{CDCl}_3$ ):  $\delta$  160.05, 138.70, 135.58, 133.62, 128.76, 128.47, 127.82, 126.14, 120.33, 116.85, 110.79, 107.50, 95.58, 77.68, 55.86, 43.42, 31.22, 22.61, 21.63. IR (neat,  $\text{cm}^{-1}$ ): 3073.85, 3002.62, 2934.50, 2834.24, 2220.46, 1640.44, 1595.17, 1574.31, 1493.19, 1455.50, 1432.92, 1251.99, 1114.12, 1047.26, 1025.78. HRMS (DART) ( $[\text{M}+\text{H}]^+$ ) Calcd. for  $\text{C}_{21}\text{H}_{21}\text{O}^+$ : 289.15869, found: 289.15874. HPLC analysis: ee = 84%. IB (99.8% hexanes: 0.2% isopropanol, 0.5 mL/min):  $t_{\text{major}} = 14.06$  min,  $t_{\text{minor}} = 13.74$  min.

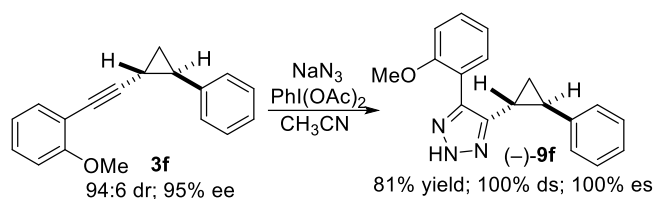

A 10 mL oven-dried Schlenk tube was capped with a Teflon screw cap, evacuated and backfilled with nitrogen 3 times. Under nitrogen atmosphere, solution of alkyne cyclopropane **3f** (0.10 mmol, 1.0 equiv) in anhydrous acetonitrile (2.0 mL) was added followed by the addition of  $\text{NaN}_3$  (0.15 mmol, 1.5 equiv) and  $\text{PhI(OAc)}_2$  (0.1 mmol, 1.0 equiv). The reaction mixture was stirred at  $22^\circ\text{C}$  for 12 h. Following completion of the reaction, the reaction mixture was concentrated under vacuum and purified by flash column chromatography to afford the compound **9f**.<sup>3</sup>

**4-(2-Methoxyphenyl)-5-((1*R*,2*R*)-2-phenylcyclopropyl)-2*H*-1,2,3-triazole ((-)-**9f**)** Yield: 81%. dr:

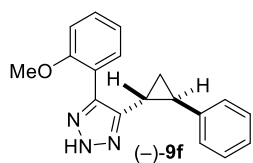

94:6.  $R_f = 0.3$  (Hexane/Ethyl Acetate: 1/1).  $[\alpha]_D^{20} = (-)-79.31^\circ$  ( $c = 0.5$ ,  $\text{CHCl}_3$ ).

$^1\text{H NMR}$  (600 MHz,  $\text{CDCl}_3$ ):  $\delta$  7.64 (dd,  $J = 7.6, 1.5$  Hz, 1H), 7.36 (ddd,  $J = 8.5,$

7.7, 1.7 Hz, 1H), 7.28 (t,  $J = 7.6$  Hz, 2H), 7.18 (dd,  $J = 10.5, 4.2$  Hz, 1H), 7.13

(d,  $J = 7.2$  Hz, 2H), 6.97 (ddd,  $J = 8.4, 7.0, 3.1$  Hz, 2H), 3.78 (s, 3H), 2.61 – 2.43

(m, 1H), 2.22 (ddd,  $J = 8.8, 5.8, 4.7$  Hz, 1H), 1.81 (dt,  $J = 8.8, 5.4$  Hz, 1H), 1.64 – 1.42 (m, 1H).  $^{13}\text{C}$

NMR (151 MHz,  $\text{CDCl}_3$ ):  $\delta$  156.42, 144.67, 142.08, 130.32, 130.04, 129.97, 128.51, 125.99, 125.92,

121.25, 116.96, 111.39, 55.70, 26.33, 19.59, 17.50. IR (neat,  $\text{cm}^{-1}$ ): 2933.53, 2836.57, 2103.14,

1604.31, 1489.90, 1462.88, 1434.70, 1117.48, 1024.70. HRMS (DART) ( $[\text{M}+\text{H}]^+$ ) Calcd. for

$\text{C}_{18}\text{H}_{18}\text{N}_3\text{O}^+$ : 292.14444, found: 292.14493. HPLC analysis: ee = 95%. IB (85% hexanes: 15%

isopropanol, 1 mL/min):  $t_{\text{major}} = 5.87$  min,  $t_{\text{minor}} = 5.30$  min.

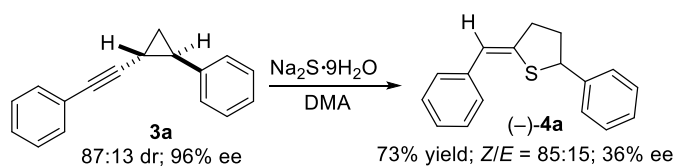

A 10 mL oven-dried Schlenk tube was capped with a Teflon screw cap, evacuated and backfilled with nitrogen 3 times. Under nitrogen atmosphere, solution of alkynylcyclopropane **3a** (0.10 mmol, 1.0 equiv) and  $\text{Na}_2\text{S}\cdot 9\text{H}_2\text{O}$  (0.60 mmol, 6.0 equiv) in DMA (0.5 mL) was added. The reaction mixture was stirred at 150 °C for 12 h. Following completion of the reaction, ethyl acetate (2.0 mL) was added. The solution was washed with water ( $3 \times 3.0$  mL) and extracted with ethyl acetate ( $3 \times 3.0$  mL). The organic layers were combined, dried over sodium sulfate, concentrated under vacuum and purified by flash column chromatography to afford the compound **4a**.<sup>4</sup>

**4-(2-Methoxyphenyl)-5-((1*R*,2*R*)-2-phenylcyclopropyl)-2*H*-1,2,3-triazole ((-)-**9f**)** Yield: 73%. *Z/E*:

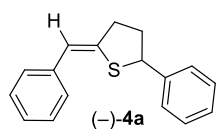

85:15.  $R_f = 0.3$  (Hexane/Ethyl Acetate = 20/1).  $[\alpha]_D^{20} = (-)-17.49^\circ$  ( $c = 0.5$ ,  $\text{CHCl}_3$ ).

$^1\text{H NMR}$  (600 MHz,  $\text{CDCl}_3$ )  $\delta$  7.45 (t,  $J = 7.9$  Hz, 4H), 7.34 (ddd,  $J = 8.3, 6.2, 1.6$

Hz, 5H), 7.17 (q,  $J = 6.8$  Hz, 1H), 6.48 (s, 1H), 4.84 (dd,  $J = 10.0, 5.3$  Hz, 1H), 3.12

– 3.02 (m, 1H), 2.96 (dddd,  $J = 13.9, 11.7, 6.3, 2.2$  Hz, 1H), 2.45 (dtd,  $J = 11.4, 5.7, 2.3$  Hz, 1H), 2.10

(tddd,  $J = 11.4, 10.0, 6.3, 1.3$  Hz, 1H).  $^{13}\text{C}$  NMR (151 MHz,  $\text{CDCl}_3$ )  $\delta$  143.17, 140.70, 137.74, 128.73,

128.45, 127.90, 127.85, 127.24, 125.90, 116.89, 56.38, 46.87, 46.73, 40.44, 37.61. IR (neat,  $\text{cm}^{-1}$ ):

3023.86, 2926.98, 1614.26, 1490.68, 1444.63, 1262.85, 1088.98, 750.35. HRMS (DART) ( $[\text{M}+\text{H}]^+$ )

Calcd. for  $\text{C}_{17}\text{H}_{17}\text{S}^+$ : 253.1045, found: 253.1045. HPLC analysis: ee = 36%. ID (99.9% hexanes : 0.1%

isopropanol, 0.8 mL/min):  $t_{\text{major}} = 13.41$  min,  $t_{\text{minor}} = 12.17$  min.

## 8. X-Ray Crystallography

The X-ray diffraction data were collected using Bruker-AXS SMART-APEXII CCD diffractometer (CuK $\alpha$ ,  $\lambda = 1.54178 \text{ \AA}$ ). Indexing was performed using *APEX2*<sup>5</sup> (Difference Vectors method). Data integration and reduction were performed using SaintPlus.<sup>6</sup> Absorption correction was performed by multi-scan method implemented in SADABS.<sup>7</sup> Space groups were determined using XPREP implemented in APEX2.<sup>5</sup> The structure was solved using SHELXS-97 (direct methods) and refined using SHELXL97 contained in WinGX v1.70.01<sup>8,9,10</sup> program.

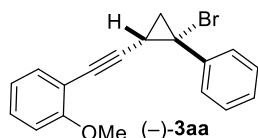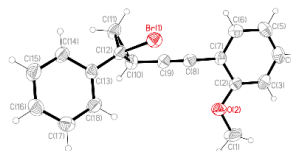

**Table S1. Crystal data and structure refinement for (-)-3aa**

|                                   |                                             |                  |
|-----------------------------------|---------------------------------------------|------------------|
| Identification code               | C18H15BrO                                   |                  |
| Empirical formula                 | C18 H15 Br O                                |                  |
| Formula weight                    | 327.21                                      |                  |
| Temperature                       | 173(2) K                                    |                  |
| Wavelength                        | 1.54178 Å                                   |                  |
| Crystal system                    | Monoclinic                                  |                  |
| Space group                       | P2 <sub>1</sub>                             |                  |
| Unit cell dimensions              | a = 8.4438(8) Å                             | α = 90°.         |
|                                   | b = 5.8701(6) Å                             | β = 100.634(3)°. |
|                                   | c = 15.4882(15) Å                           | γ = 90°.         |
| Volume                            | 754.50(13) Å <sup>3</sup>                   |                  |
| Z                                 | 2                                           |                  |
| Density (calculated)              | 1.440 Mg/m <sup>3</sup>                     |                  |
| Absorption coefficient            | 3.640 mm <sup>-1</sup>                      |                  |
| F(000)                            | 332                                         |                  |
| Crystal size                      | 0.380 x 0.080 x 0.060 mm <sup>3</sup>       |                  |
| Theta range for data collection   | 2.903 to 66.379°.                           |                  |
| Index ranges                      | -9 ≤ h ≤ 9, -6 ≤ k ≤ 6, -18 ≤ l ≤ 18        |                  |
| Reflections collected             | 8320                                        |                  |
| Independent reflections           | 2577 [R(int) = 0.0332]                      |                  |
| Completeness to theta = 66.380°   | 98.6 %                                      |                  |
| Absorption correction             | Semi-empirical from equivalents             |                  |
| Max. and min. transmission        | 0.7528 and 0.5569                           |                  |
| Refinement method                 | Full-matrix least-squares on F <sup>2</sup> |                  |
| Data / restraints / parameters    | 2577 / 1 / 181                              |                  |
| Goodness-of-fit on F <sup>2</sup> | 1.077                                       |                  |
| Final R indices [I > 2σ(I)]       | R1 = 0.0205, wR2 = 0.0546                   |                  |
| R indices (all data)              | R1 = 0.0275, wR2 = 0.0553                   |                  |
| Absolute structure parameter      | -0.038(14)                                  |                  |
| Extinction coefficient            | n/a                                         |                  |
| Largest diff. peak and hole       | 0.215 and -0.219 e.Å <sup>-3</sup>          |                  |

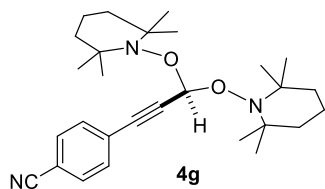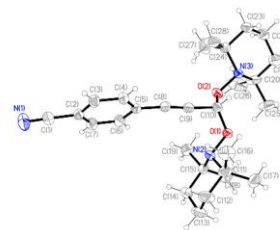

**Table S2. Crystal data and structure refinement for 4g**

|                                   |                                             |                    |
|-----------------------------------|---------------------------------------------|--------------------|
| identification code               | C28H41N3O2                                  |                    |
| Empirical formula                 | C28 H41 N3 O2                               |                    |
| Formula weight                    | 451.64                                      |                    |
| Temperature                       | 173(2) K                                    |                    |
| Wavelength                        | 1.54178 Å                                   |                    |
| Crystal system                    | Triclinic                                   |                    |
| Space group                       | P <sub>1</sub>                              |                    |
| Unit cell dimensions              | a = 7.6884(2) Å                             | α = 107.9050(10)°. |
|                                   | b = 12.6896(3) Å                            | β = 90.1750(10)°.  |
|                                   | c = 14.6933(4) Å                            | γ = 99.4080(10)°.  |
| Volume                            | 1343.57(6) Å <sup>3</sup>                   |                    |
| Z                                 | 2                                           |                    |
| Density (calculated)              | 1.116 Mg/m <sup>3</sup>                     |                    |
| Absorption coefficient            | 0.546 mm <sup>-1</sup>                      |                    |
| F(000)                            | 492                                         |                    |
| Crystal size                      | 0.160 x 0.120 x 0.060 mm <sup>3</sup>       |                    |
| Theta range for data collection   | 3.166 to 66.545°.                           |                    |
| Index ranges                      | -9 ≤ h ≤ 9, -15 ≤ k ≤ 15, -17 ≤ l ≤ 17      |                    |
| Reflections collected             | 22818                                       |                    |
| Independent reflections           | 4588 [R(int) = 0.0282]                      |                    |
| Completeness to theta = 66.545°   | 96.6 %                                      |                    |
| Absorption correction             | Semi-empirical from equivalents             |                    |
| Max. and min. transmission        | 0.7528 and 0.7131                           |                    |
| Refinement method                 | Full-matrix least-squares on F <sup>2</sup> |                    |
| Data / restraints / parameters    | 4588 / 21 / 336                             |                    |
| Goodness-of-fit on F <sup>2</sup> | 1.022                                       |                    |
| Final R indices [I > 2σ(I)]       | R1 = 0.0417, wR2 = 0.1093                   |                    |
| R indices (all data)              | R1 = 0.0498, wR2 = 0.1195                   |                    |
| Extinction coefficient            | n/a                                         |                    |
| Largest diff. peak and hole       | 0.184 and -0.180 e.Å <sup>-3</sup>          |                    |

## 9. DFT Calculations

Considering the cost of time and computing resources for the large system with [Co(P6)], the geometry optimizations were performed with the Gaussian 16<sup>11</sup> at the BP86<sup>12,13</sup>/lanl2dz<sup>14,15</sup> level of theory in the gas phase at room temperature. Gas-phase Hessian matrix calculations were applied to the characterization of all minima (without imaginary frequency) and transition states (with only one imaginary frequency).

Thermochemical parameters such as internal energy, enthalpy, entropy, Gibbs free energy and thermal corrections (entropy and enthalpy, 298.15 K, 1 Atm) were obtained from these calculations. To further improve the accuracy of energies, single point energies were carried out at the B3LYP<sup>16</sup>/def2-tzvp<sup>14,15</sup> level of theory along with Grimme's dispersion correction<sup>17</sup> (D3BJ) and SMD<sup>18</sup> solvation model (in ethyl acetate).

Independent Gradient Model (IGM)<sup>19</sup> analysis was performed with Multiwfn<sup>20</sup> software package using high quality grid option to generate files for further plotting. The visualization of IGM analysis results were presented with VMD<sup>21</sup> visualization software. As shown in Scheme S2, the 3D diagrams of optimized structures were generated with CYLview software.<sup>22</sup> The NCI (noncovalent interaction) and the spin density visual representations of optimized structures were generated with VMD and rendered with Tachyon.<sup>23</sup>

### 9.1. Scheme S2: Calculated Energy Diagram for [Co(P6)]-Catalyzed Radical Cyclopropanation of Styrene (2a) with Alkynyl Diazomethane (1a')

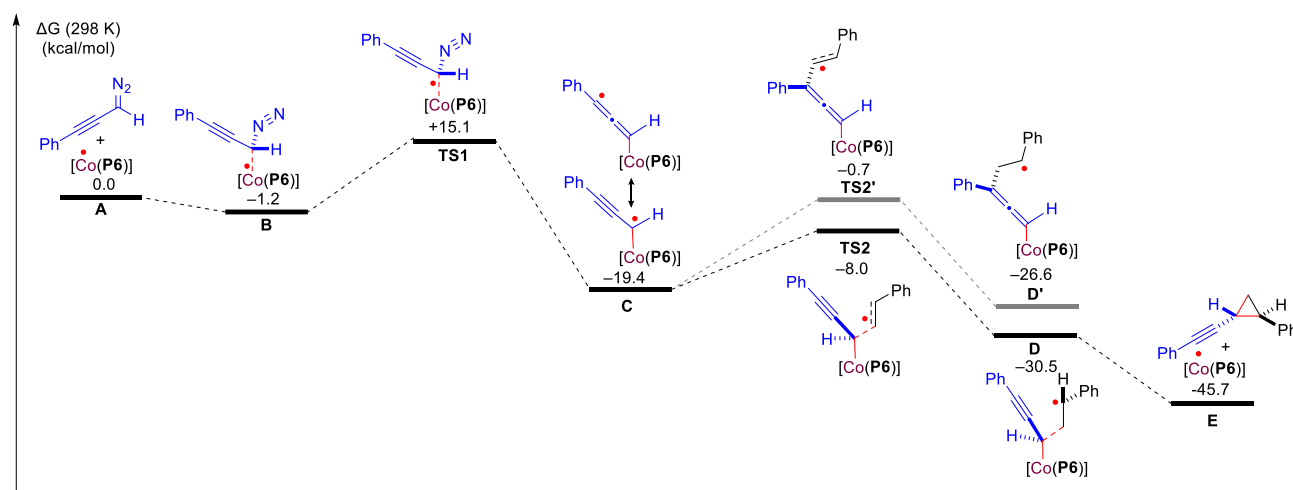

## 9.2. Scheme S3: Optimized Structure Models, NCI Plot and Spin Density Representations of Intermediates and Transition States

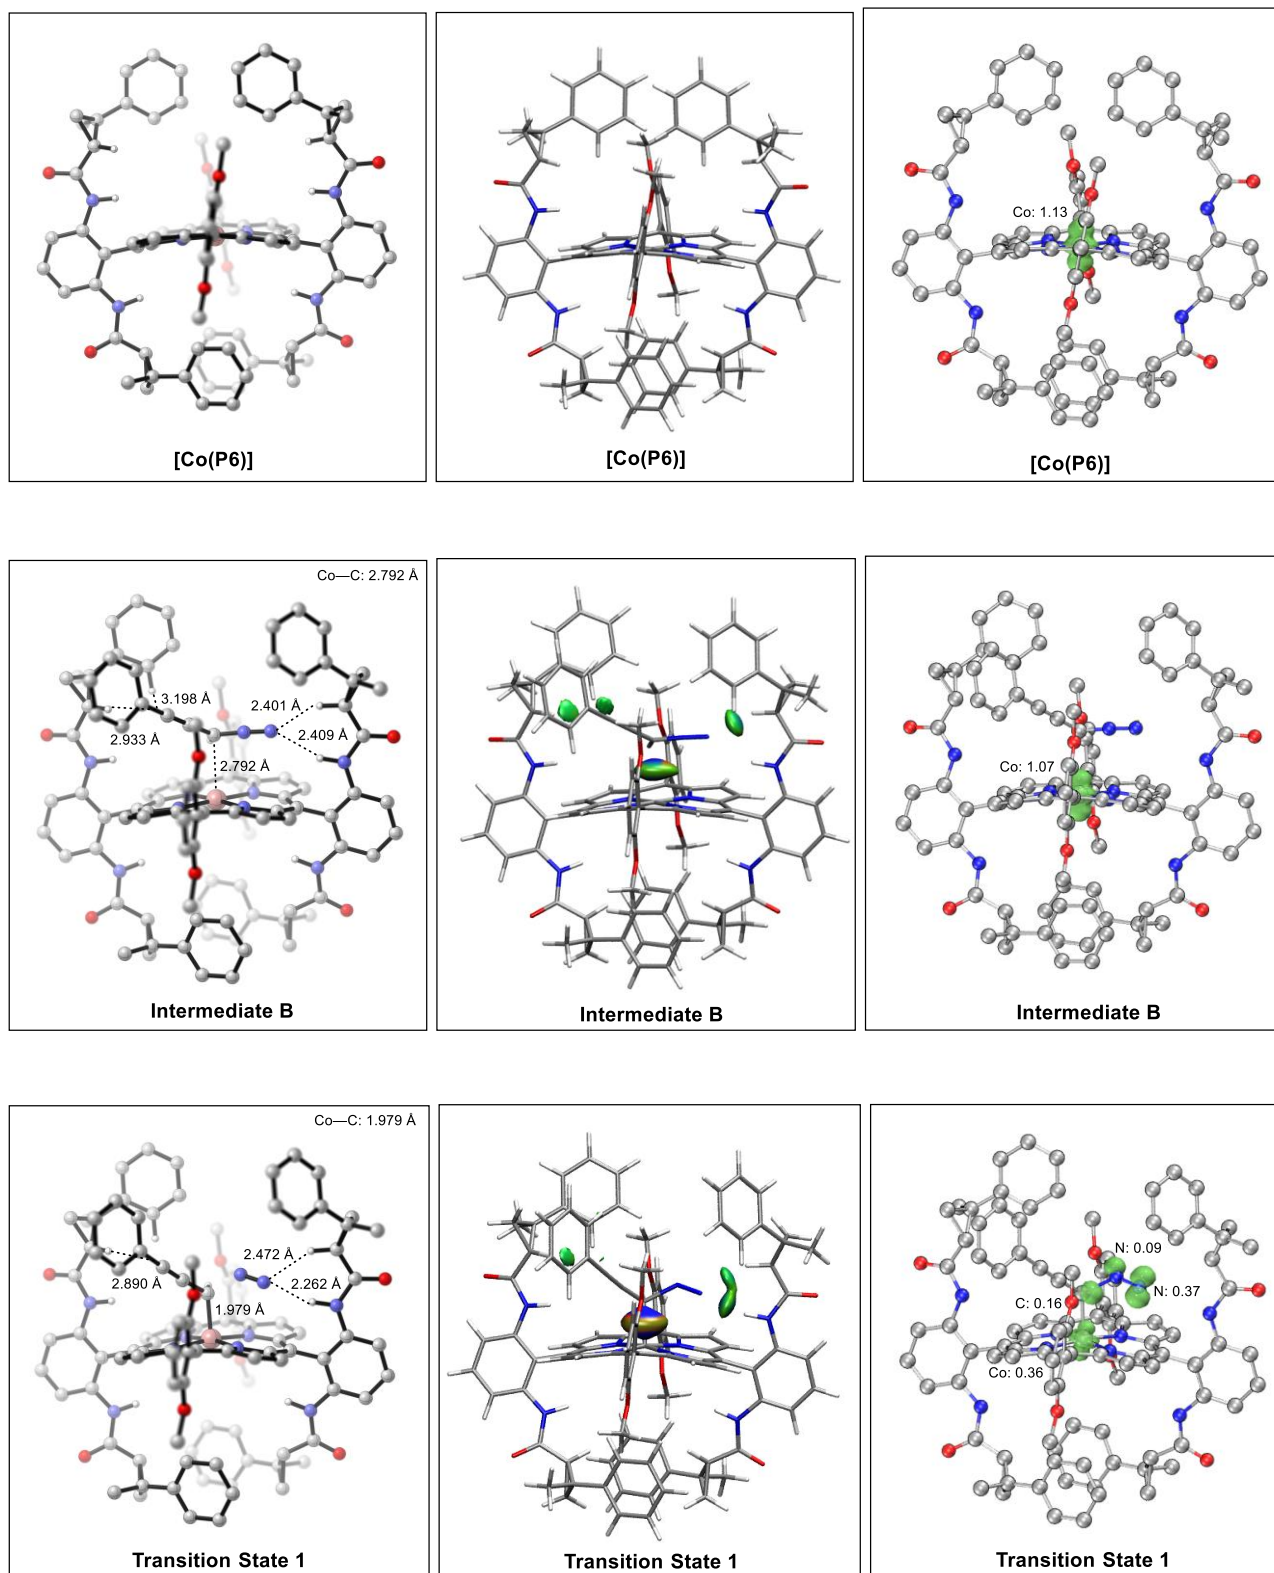

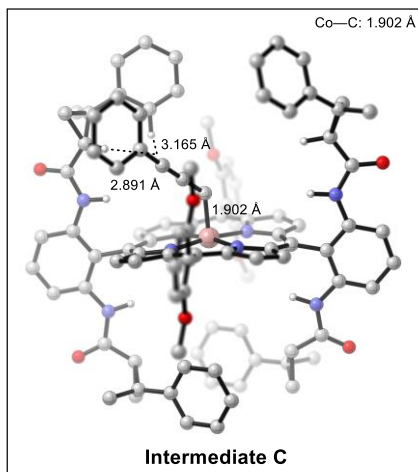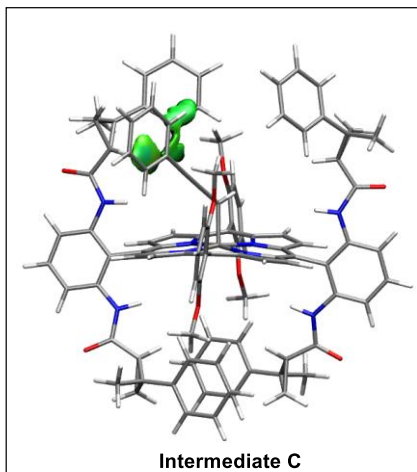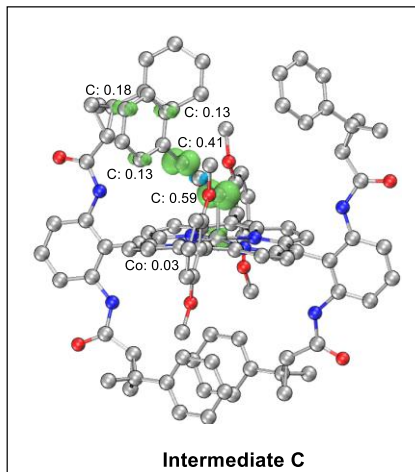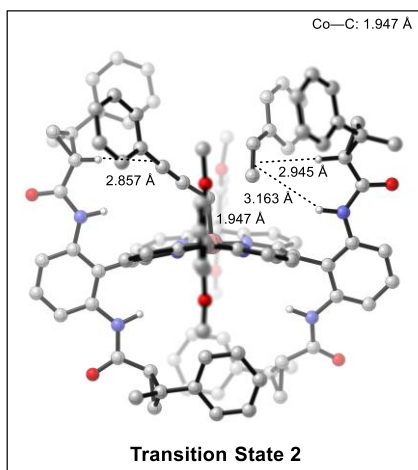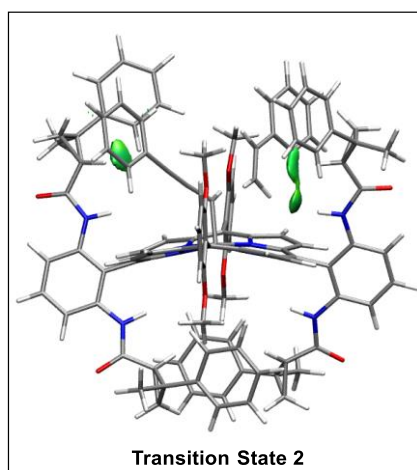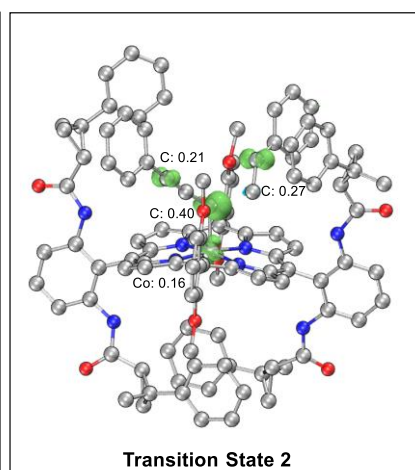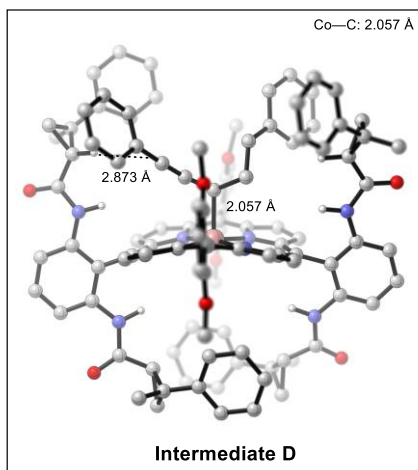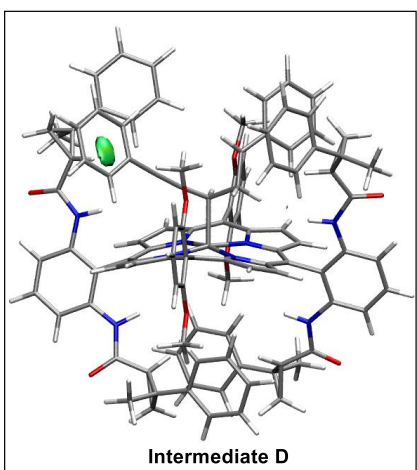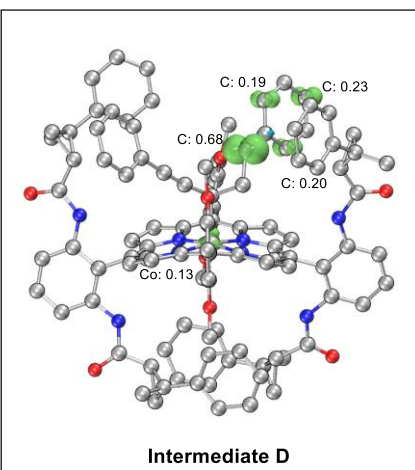



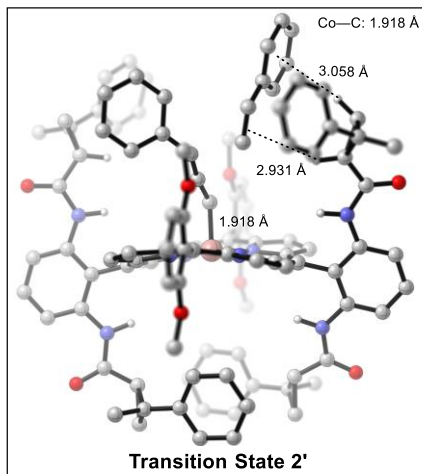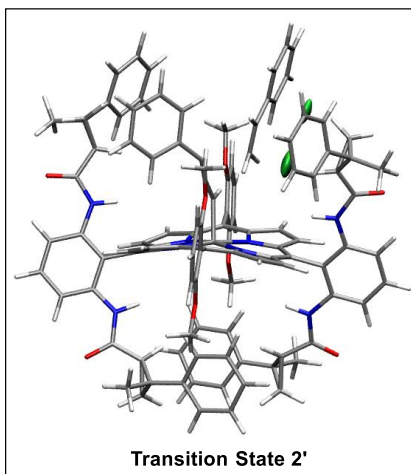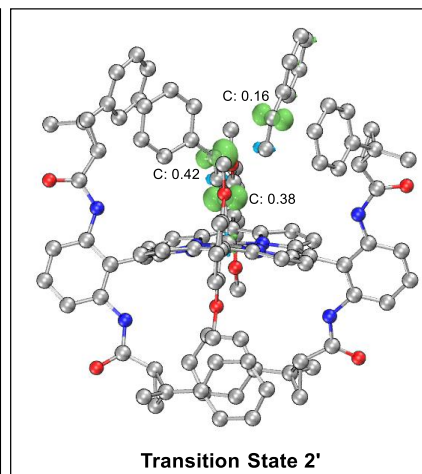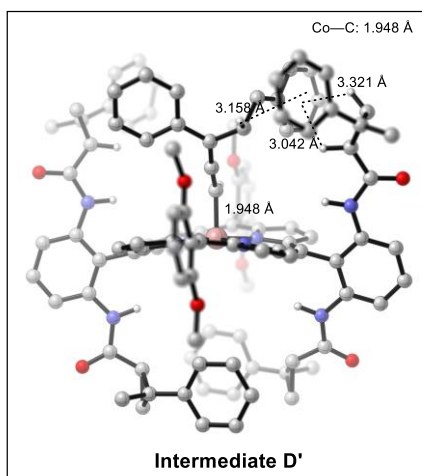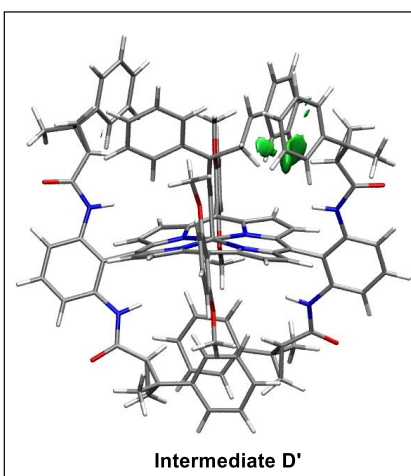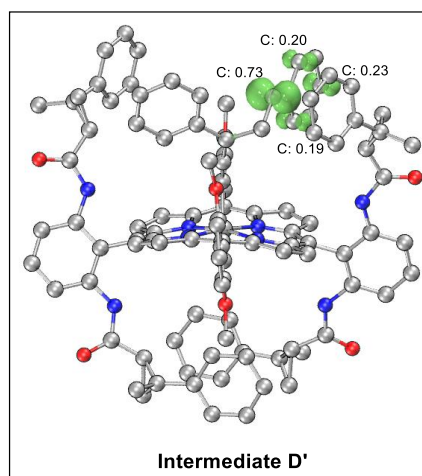

## Intermediate A

A<sub>[Co(II)(P6)]</sub>

Temperature: 298.15 Kelvin

Pressure: 1.0 Atm

G<sub>corr</sub>: 1.333865 Hartree

H<sub>corr</sub>: 1.583795 Hartree

SCF: -4738.422006 Hartree

S: 526.023 Cal/Mol-Kelvin

H: -4736.838211 Hartree

G: -4737.088141 Hartree

Cartesian Coordinates:

|    |             |             |            |
|----|-------------|-------------|------------|
| Co | 0.03934800  | -0.00003300 | 0.00001000 |
| O  | 3.08077300  | 7.33946200  | 0.26140600 |
| O  | -4.90023900 | 5.62002500  | 1.06249500 |
| O  | -1.78130800 | -0.18595100 | 5.26643800 |
| O  | 2.87722900  | -0.86170600 | 4.48060600 |
| N  | 0.05983900  | 1.24476900  | 1.53516800 |
| N  | 0.01209800  | -1.52989400 | 1.24959600 |
| N  | 1.80702300  | 5.36918900  | 0.47554800 |
| H  | 1.88057400  | 4.34710300  | 0.51694300 |
| N  | -2.95133500 | 4.36821100  | 0.62192900 |
| H  | -2.61075500 | 3.41062600  | 0.48572700 |
| C  | -0.29835800 | 3.43626100  | 0.35821500 |
| C  | -0.10254700 | 2.64686000  | 1.51000200 |
| C  | 0.01093100  | 3.20182300  | 2.85253800 |

|   |             |             |            |
|---|-------------|-------------|------------|
| H | -0.08367500 | 4.26113300  | 3.08888000 |
| C | 0.26773900  | 2.14634300  | 3.70288600 |
| H | 0.41994300  | 2.16532200  | 4.78094400 |
| C | 0.26458100  | 0.93413100  | 2.89779400 |
| C | 0.34462300  | -0.35788700 | 3.44409600 |
| C | 0.15853700  | -1.50440100 | 2.65343200 |
| C | 0.02778800  | -2.84446900 | 3.20543700 |
| H | 0.10321600  | -3.07975500 | 4.26613500 |
| C | -0.22242800 | -3.69797100 | 2.15125300 |
| H | -0.38252200 | -4.77521800 | 2.16925200 |
| C | -0.20362500 | -2.89041200 | 0.93846000 |
| C | -0.58298200 | 4.91134200  | 0.50847100 |
| C | 0.47456000  | 5.87233200  | 0.52250800 |
| C | 0.18725800  | 7.26155900  | 0.61306500 |
| H | 1.01024100  | 7.97775900  | 0.59745300 |
| C | -1.15796200 | 7.67423200  | 0.71884400 |
| H | -1.38022800 | 8.74510400  | 0.79364300 |
| C | -2.22526300 | 6.75156000  | 0.73678200 |
| H | -3.26416600 | 7.07108400  | 0.83412000 |
| C | -1.93495600 | 5.36467500  | 0.62602500 |
| C | 3.01217200  | 6.07589000  | 0.40158400 |
| C | 4.23191000  | 5.19991800  | 0.51179200 |
| H | 4.07399900  | 4.22650200  | 0.99334800 |
| C | 5.58751000  | 5.88633800  | 0.78549700 |
| H | 6.25549000  | 5.40469300  | 1.50692700 |
| H | 5.54816300  | 6.98021800  | 0.82483300 |

|   |             |            |             |
|---|-------------|------------|-------------|
| C | 5.36253100  | 5.22663500 | -0.57706900 |
| C | 6.06524200  | 3.90716900 | -0.84527700 |
| C | 7.48530200  | 3.86253800 | -0.88261500 |
| H | 8.05460800  | 4.77809500 | -0.67720700 |
| C | 8.16521200  | 2.65518100 | -1.16671100 |
| H | 9.26158400  | 2.63731200 | -1.18856300 |
| C | 7.43264700  | 1.46785400 | -1.41263500 |
| H | 7.95535700  | 0.52601400 | -1.61638600 |
| C | 6.01727800  | 1.50223500 | -1.38162700 |
| H | 5.44321900  | 0.58382300 | -1.55490800 |
| C | 5.34041900  | 2.71522500 | -1.10812900 |
| H | 4.24346700  | 2.73443800 | -1.09289600 |
| C | 5.19559300  | 6.11807800 | -1.81578400 |
| H | 6.18833300  | 6.37704000 | -2.23019500 |
| H | 4.66492900  | 7.05187700 | -1.56257000 |
| H | 4.62625500  | 5.59078400 | -2.60443900 |
| C | -4.32833300 | 4.50521800 | 0.83688600  |
| C | -5.06448900 | 3.19454400 | 0.79893700  |
| H | -4.56995500 | 2.38644300 | 0.24515900  |
| C | -6.60477700 | 3.20018200 | 0.74228800  |
| H | -7.06809200 | 4.19248100 | 0.76748200  |
| H | -7.07237800 | 2.46842900 | 0.07582200  |
| C | -5.92641800 | 2.71772600 | 2.02541400  |
| C | -5.89825800 | 1.22917200 | 2.32110200  |
| C | -4.67466600 | 0.56547200 | 2.60389400  |
| H | -3.73188600 | 1.12559000 | 2.56223000  |

|   |             |             |             |
|---|-------------|-------------|-------------|
| C | -4.65476800 | -0.81117500 | 2.93220600  |
| H | -3.69803300 | -1.30409400 | 3.14192200  |
| C | -5.86628800 | -1.54350000 | 2.99209900  |
| H | -5.85356900 | -2.61124700 | 3.24091600  |
| C | -7.09315400 | -0.88891200 | 2.72090200  |
| H | -8.03476400 | -1.44944800 | 2.76916200  |
| C | -7.10708200 | 0.48664100  | 2.38824600  |
| H | -8.05750700 | 0.99072700  | 2.17175200  |
| C | -6.00510000 | 3.60240400  | 3.27825400  |
| H | -6.93984800 | 3.38707100  | 3.82997300  |
| H | -5.99131700 | 4.67272100  | 3.01013500  |
| H | -5.15597500 | 3.39898000  | 3.95811500  |
| C | 0.55830100  | -0.51798100 | 4.92373700  |
| C | -0.52329300 | -0.42191500 | 5.84550400  |
| C | -0.31790500 | -0.56588900 | 7.24392000  |
| H | -1.15099700 | -0.49072800 | 7.94782000  |
| C | 0.98655300  | -0.81411600 | 7.72143700  |
| H | 1.15152900  | -0.92601700 | 8.79931900  |
| C | 2.08233900  | -0.92275900 | 6.83916600  |
| H | 3.08352100  | -1.11474400 | 7.23414500  |
| C | 1.85922900  | -0.77455400 | 5.44389400  |
| C | -2.93434700 | -0.04071500 | 6.17099300  |
| C | 4.23897400  | -1.16179400 | 4.95137500  |
| O | 3.08104600  | -7.33945400 | -0.26115800 |
| O | -4.90002400 | -5.62015500 | -1.06252300 |
| O | -1.78143200 | 0.18583700  | -5.26634000 |

|   |             |             |             |
|---|-------------|-------------|-------------|
| O | 2.87710100  | 0.86173400  | -4.48066300 |
| N | 0.05990500  | -1.24483600 | -1.53514700 |
| N | 0.01199500  | 1.52982500  | -1.24958000 |
| N | 1.80724200  | -5.36923600 | -0.47551300 |
| H | 1.88077000  | -4.34715100 | -0.51698300 |
| N | -2.95111900 | -4.36833300 | -0.62197700 |
| H | -2.61054700 | -3.41074500 | -0.48577700 |
| C | -0.29817600 | -3.43634700 | -0.35819200 |
| C | -0.10240900 | -2.64693600 | -1.50997900 |
| C | 0.01104900  | -3.20189000 | -2.85252100 |
| H | -0.08351000 | -4.26120400 | -3.08886300 |
| C | 0.26776600  | -2.14639300 | -3.70287500 |
| H | 0.41992200  | -2.16535400 | -4.78094100 |
| C | 0.26457500  | -0.93418500 | -2.89777900 |
| C | 0.34454600  | 0.35783600  | -3.44408200 |
| C | 0.15843000  | 1.50434400  | -2.65341500 |
| C | 0.02763400  | 2.84440900  | -3.20541500 |
| H | 0.10306900  | 3.07970300  | -4.26611200 |
| C | -0.22261400 | 3.69789700  | -2.15122700 |
| H | -0.38274500 | 4.77513900  | -2.16922100 |
| C | -0.20378300 | 2.89033300  | -0.93843800 |
| C | -0.58276900 | -4.91143300 | -0.50844600 |
| C | 0.47479100  | -5.87240400 | -0.52245100 |
| C | 0.18751100  | -7.26163800 | -0.61297100 |
| H | 1.01050400  | -7.97782600 | -0.59733500 |
| C | -1.15770100 | -7.67433700 | -0.71876500 |

|   |             |             |             |
|---|-------------|-------------|-------------|
| H | -1.37994300 | -8.74521500 | -0.79354700 |
| C | -2.22501700 | -6.75168200 | -0.73674900 |
| H | -3.26391300 | -7.07122300 | -0.83411000 |
| C | -1.93473300 | -5.36479000 | -0.62601500 |
| C | 3.01241000  | -6.07590300 | -0.40151000 |
| C | 4.23212200  | -5.19990100 | -0.51176400 |
| H | 4.07420000  | -4.22655900 | -0.99346500 |
| C | 5.58776600  | -5.88631400 | -0.78529000 |
| H | 6.25576200  | -5.40475100 | -1.50676200 |
| H | 5.54845800  | -6.98020000 | -0.82446900 |
| C | 5.36268700  | -5.22641700 | 0.57716000  |
| C | 6.06531800  | -3.90687500 | 0.84520500  |
| C | 7.48537400  | -3.86210100 | 0.88244500  |
| H | 8.05475500  | -4.77762200 | 0.67708400  |
| C | 8.16518200  | -2.65465000 | 1.16639600  |
| H | 9.26155300  | -2.63666600 | 1.18817000  |
| C | 7.43251400  | -1.46737700 | 1.41226900  |
| H | 7.95514300  | -0.52546700 | 1.61590200  |
| C | 6.01714400  | -1.50190100 | 1.38135500  |
| H | 5.44300600  | -0.58352900 | 1.55458700  |
| C | 5.34039100  | -2.71498100 | 1.10800300  |
| H | 4.24344000  | -2.73430300 | 1.09281400  |
| C | 5.19569800  | -6.11766600 | 1.81600600  |
| H | 6.18841800  | -6.37650600 | 2.23053700  |
| H | 4.66509500  | -7.05153000 | 1.56290200  |
| H | 4.62626800  | -5.59027400 | 2.60453000  |

|   |             |             |             |
|---|-------------|-------------|-------------|
| C | -4.32810500 | -4.50533900 | -0.83699200 |
| C | -5.06426400 | -3.19466200 | -0.79901000 |
| H | -4.56972400 | -2.38658300 | -0.24520500 |
| C | -6.60455200 | -3.20029900 | -0.74235400 |
| H | -7.06787000 | -4.19259500 | -0.76757500 |
| H | -7.07214900 | -2.46855400 | -0.07587900 |
| C | -5.92618300 | -2.71781400 | -2.02547100 |
| C | -5.89802600 | -1.22925000 | -2.32111900 |
| C | -4.67444200 | -0.56550000 | -2.60381200 |
| H | -3.73164300 | -1.12558200 | -2.56210400 |
| C | -4.65457700 | 0.81115700  | -2.93209000 |
| H | -3.69785100 | 1.30412000  | -3.14174800 |
| C | -5.86611800 | 1.54343900  | -2.99204500 |
| H | -5.85341900 | 2.61119400  | -3.24082900 |
| C | -7.09298100 | 0.88879900  | -2.72094700 |
| H | -8.03460800 | 1.44930200  | -2.76925500 |
| C | -7.10687700 | -0.48676200 | -2.38832900 |
| H | -8.05729600 | -0.99089200 | -2.17191200 |
| C | -6.00487300 | -3.60246300 | -3.27832900 |
| H | -6.93962400 | -3.38712100 | -3.83003800 |
| H | -5.99108900 | -4.67278600 | -3.01023100 |
| H | -5.15575100 | -3.39903000 | -3.95819000 |
| C | 0.55817900  | 0.51794000  | -4.92373000 |
| C | -0.52345100 | 0.42185400  | -5.84545300 |
| C | -0.31811500 | 0.56583800  | -7.24387600 |
| H | -1.15122900 | 0.49066400  | -7.94774800 |



|   |             |             |             |
|---|-------------|-------------|-------------|
| C | 0.98632300  | 0.81409500  | -7.72143600 |
| H | 1.15125900  | 0.92600300  | -8.79932400 |
| C | 2.08214000  | 0.92275700  | -6.83920700 |
| H | 3.08330500  | 1.11476100  | -7.23422100 |
| C | 1.85908100  | 0.77454200  | -5.44392700 |
| C | -2.93450200 | 0.04056600  | -6.17084900 |
| C | 4.23882600  | 1.16185500  | -4.95146300 |
| H | 4.84822200  | -1.22351100 | 4.03848200  |
| H | 4.27196200  | -2.13048600 | 5.48642700  |
| H | 4.61994500  | -0.35558600 | 5.60810700  |
| H | -3.79131200 | 0.14062400  | 5.50680200  |
| H | -2.79575200 | 0.81735100  | 6.85675200  |
| H | -3.10180900 | -0.96675600 | 6.75447300  |
| H | 4.84808900  | 1.22361200  | -4.03858100 |
| H | 4.27177800  | 2.13054400  | -5.48652400 |
| H | 4.61980800  | 0.35565200  | -5.60819200 |
| H | -3.79143200 | -0.14081600 | -5.50662300 |
| H | -2.79590300 | -0.81748800 | -6.85662400 |
| H | -3.10202300 | 0.96660600  | -6.75431400 |

**A<sub>1a</sub>'**

Temperature: 298.15 Kelvin

Pressure: 1.0 Atm

G\_corr: 0.084648 Hartree

H\_corr: 0.131982 Hartree

SCF: -456.153645Hartree

S: 99.622 Cal/Mol-Kelvin

H: -455.757252 Hartree

G: -455.804586 Hartree

Cartesian Coordinates:

|   |             |             |             |
|---|-------------|-------------|-------------|
| N | -4.85027900 | 1.00185300  | 0.00083100  |
| N | -4.03063300 | 0.14431500  | 0.00015400  |
| H | -3.51793700 | -1.84750100 | -0.00032800 |
| C | -3.11657000 | -0.82960100 | -0.00020700 |
| C | -1.73064700 | -0.55419000 | -0.00054500 |
| C | -0.50204000 | -0.35992600 | -0.00065000 |
| H | 0.74035900  | 2.04581800  | -0.00083600 |
| C | 0.91075500  | -0.13281600 | -0.00047000 |
| C | 1.43475200  | 1.19816300  | -0.00048400 |
| C | 1.82602100  | -1.23196800 | 0.00022600  |
| H | 1.43273300  | -2.25473400 | 0.00043100  |
| C | 2.82854400  | 1.41628400  | 0.00001400  |
| H | 3.21576200  | 2.44188900  | -0.00007400 |
| C | 3.21786700  | -1.00166000 | 0.00045500  |
| C | 3.72769200  | 0.32074800  | 0.00037600  |
| H | 3.90752200  | -1.85383800 | 0.00089600  |
| H | 4.80971100  | 0.49498500  | 0.00071900  |

### **Intermediate B**

Temperature: 298.15 Kelvin

Pressure: 1.0 Atm

G\_corr: 1.440962 Hartree

H\_corr: 1.717747 Hartree

SCF: -5194.313943 Hartree

S: 582.542 Cal/Mol-Kelvin

H: -5192.596196 Hartree

G: -5192.872981 Hartree

Cartesian Coordinates:

|    |             |             |             |
|----|-------------|-------------|-------------|
| N  | 2.30173200  | 1.68473800  | 0.71295300  |
| N  | 2.21064600  | 2.86133900  | 0.66789400  |
| Co | -0.36358800 | 0.05943400  | 0.13176100  |
| O  | 3.30091400  | -7.03292600 | 0.69027800  |
| O  | -4.49869500 | -6.03228700 | -1.48989300 |
| O  | -1.73735700 | 0.13111000  | -5.31783200 |
| O  | 2.79514800  | 0.88770900  | -4.04922700 |
| N  | -0.10072000 | -1.21552400 | -1.35325600 |
| N  | -0.46938100 | 1.54833400  | -1.16640700 |
| N  | 1.97320500  | -5.15598100 | 0.18414700  |
| H  | 1.98569400  | -4.13290700 | 0.11074000  |
| N  | -2.78646000 | -4.59363800 | -0.74169600 |
| H  | -2.57251400 | -3.60765900 | -0.55945400 |
| C  | -0.30083700 | -3.40575800 | -0.13314900 |
| C  | -0.11199200 | -2.62517800 | -1.29320200 |
| C  | 0.14644500  | -3.19672600 | -2.60859500 |
| H  | 0.17224600  | -4.26557600 | -2.81860200 |
| C  | 0.34780200  | -2.13972400 | -3.47313300 |

|   |             |             |             |
|---|-------------|-------------|-------------|
| H | 0.55630100  | -2.16679000 | -4.54199500 |
| C | 0.17428000  | -0.91581900 | -2.70404400 |
| C | 0.19050300  | 0.36668400  | -3.27882600 |
| C | -0.17527900 | 1.50867600  | -2.54578200 |
| C | -0.39474800 | 2.81334600  | -3.15359500 |
| H | -0.23198600 | 3.03334300  | -4.20782700 |
| C | -0.86270300 | 3.65126900  | -2.16266100 |
| H | -1.15169600 | 4.69915900  | -2.23473000 |
| C | -0.88331700 | 2.87795300  | -0.92758600 |
| C | -0.41742600 | -4.90543600 | -0.26099000 |
| C | 0.70758300  | -5.76676800 | -0.06741300 |
| C | 0.55664700  | -7.17834200 | -0.15906000 |
| H | 1.42301700  | -7.81725200 | 0.01560900  |
| C | -0.71028400 | -7.71477600 | -0.46873100 |
| H | -0.82164800 | -8.80269500 | -0.54506000 |
| C | -1.83672500 | -6.89439900 | -0.68419400 |
| H | -2.81473000 | -7.30829600 | -0.93478700 |
| C | -1.68990700 | -5.48565000 | -0.57115100 |
| C | 3.18917400  | -5.77874000 | 0.49502400  |
| C | 4.37188300  | -4.84906700 | 0.54797200  |
| H | 4.22871600  | -3.86445100 | 0.08729700  |
| C | 5.76492800  | -5.49557100 | 0.35560500  |
| H | 6.47384500  | -4.96190000 | -0.28526300 |
| H | 5.75461200  | -6.58699500 | 0.26467000  |
| C | 5.41162400  | -4.90427500 | 1.72301800  |
| C | 6.09408900  | -3.59973100 | 2.10003300  |

|   |             |             |             |
|---|-------------|-------------|-------------|
| C | 7.48017400  | -3.61799200 | 2.42111700  |
| H | 8.03042700  | -4.56576800 | 2.36161900  |
| C | 8.15562400  | -2.43484900 | 2.79721400  |
| H | 9.22481900  | -2.46901900 | 3.03902100  |
| C | 7.45562500  | -1.20330200 | 2.85095500  |
| H | 7.97948600  | -0.28088000 | 3.12864000  |
| C | 6.07704300  | -1.17409200 | 2.53346800  |
| H | 5.53114400  | -0.22240900 | 2.54606900  |
| C | 5.40071800  | -2.36512100 | 2.17163700  |
| H | 4.33258900  | -2.32985800 | 1.92851300  |
| C | 5.16850600  | -5.85086700 | 2.90718500  |
| H | 6.13042700  | -6.11015300 | 3.38882100  |
| H | 4.67828400  | -6.78084800 | 2.57350200  |
| H | 4.52868500  | -5.36670400 | 3.66901500  |
| C | -4.09096100 | -4.86889700 | -1.17091100 |
| C | -4.96360800 | -3.64644600 | -1.23796200 |
| H | -4.65719300 | -2.80673200 | -0.60157400 |
| C | -6.48291100 | -3.82749800 | -1.42420900 |
| H | -6.81802000 | -4.86483400 | -1.53152400 |
| H | -7.12924700 | -3.17265200 | -0.83144100 |
| C | -5.67462600 | -3.23519200 | -2.57933800 |
| C | -5.77720800 | -1.74547100 | -2.85046300 |
| C | -4.61209100 | -0.93782300 | -2.93736300 |
| H | -3.62602400 | -1.38653600 | -2.76282400 |
| C | -4.70663500 | 0.44081700  | -3.24388000 |
| H | -3.79388400 | 1.04493000  | -3.30564900 |

|   |             |             |             |
|---|-------------|-------------|-------------|
| C | -5.97358400 | 1.03042000  | -3.47809800 |
| H | -6.05026900 | 2.09973500  | -3.70747200 |
| C | -7.14132500 | 0.23162900  | -3.40355000 |
| H | -8.12471600 | 0.68203400  | -3.58543300 |
| C | -7.04185500 | -1.14543300 | -3.09239300 |
| H | -7.94740200 | -1.76225600 | -3.02931100 |
| C | -5.45459700 | -4.08608000 | -3.83868100 |
| H | -6.31112700 | -3.96213100 | -4.52833600 |
| H | -5.35834400 | -5.15536200 | -3.58353500 |
| H | -4.53964900 | -3.76786600 | -4.37370400 |
| C | 0.54526300  | 0.51286700  | -4.73310400 |
| C | -0.43053100 | 0.38903000  | -5.76234100 |
| C | -0.07903600 | 0.52162400  | -7.13303400 |
| H | -0.83174800 | 0.42663400  | -7.92018800 |
| C | 1.26551600  | 0.78223200  | -7.47330200 |
| H | 1.54151500  | 0.88655700  | -8.52903500 |
| C | 2.26100100  | 0.91260000  | -6.48155100 |
| H | 3.29611700  | 1.11559600  | -6.76916700 |
| C | 1.89089300  | 0.77733200  | -5.11690100 |
| C | -2.78468500 | -0.04429600 | -6.33856100 |
| C | 4.21234300  | 1.10882900  | -4.36984800 |
| O | 1.25540100  | 8.00568700  | 0.82088800  |
| O | -6.15876100 | 4.68168900  | 0.63961400  |
| O | -2.65977900 | -0.33570000 | 5.22757200  |
| O | 2.09424000  | -0.21665800 | 4.84704200  |
| N | -0.69307100 | 1.33327600  | 1.61327200  |

|   |             |             |            |
|---|-------------|-------------|------------|
| N | -0.36654300 | -1.43774000 | 1.42563700 |
| N | 0.50102900  | 5.79031500  | 0.52108100 |
| H | 0.81890600  | 4.81551300  | 0.44667300 |
| N | -3.97790300 | 3.83558900  | 0.33307100 |
| H | -3.45160300 | 2.96205900  | 0.22847300 |
| C | -1.20238800 | 3.43261700  | 0.32836500 |
| C | -1.03852600 | 2.69906900  | 1.52180200 |
| C | -1.15091800 | 3.29034100  | 2.84828700 |
| H | -1.41299400 | 4.33103900  | 3.03512500 |
| C | -0.84256400 | 2.30039900  | 3.75844500 |
| H | -0.81137300 | 2.36449600  | 4.84506900 |
| C | -0.59196400 | 1.08349100  | 3.00085800 |
| C | -0.38877300 | -0.17413600 | 3.59554900 |
| C | -0.35652700 | -1.35747700 | 2.83621900 |
| C | -0.37769400 | -2.68855700 | 3.42365900 |
| H | -0.37711600 | -2.88615900 | 4.49469200 |
| C | -0.42674100 | -3.59294100 | 2.38277700 |
| H | -0.46421600 | -4.68066500 | 2.42679300 |
| C | -0.38740000 | -2.82144800 | 1.14710700 |
| C | -1.75440800 | 4.83579800  | 0.40332900 |
| C | -0.91279400 | 5.98962300  | 0.49216100 |
| C | -1.48999400 | 7.28962100  | 0.56279400 |
| H | -0.83167600 | 8.15597600  | 0.63239500 |
| C | -2.89310100 | 7.42489600  | 0.55742400 |
| H | -3.32908000 | 8.42911500  | 0.61525000 |
| C | -3.75074000 | 6.30858400  | 0.48511900 |

|   |             |            |             |
|---|-------------|------------|-------------|
| H | -4.83706500 | 6.41006500 | 0.49600700  |
| C | -3.17728100 | 5.01158700 | 0.40725500  |
| C | 1.49996800  | 6.76022500 | 0.69937000  |
| C | 2.89778800  | 6.21330800 | 0.75844400  |
| H | 2.98688900  | 5.12629200 | 0.84479500  |
| C | 3.95950200  | 7.04744600 | 1.51767200  |
| H | 4.64803000  | 6.49680700 | 2.16744300  |
| H | 3.60243500  | 8.00748700 | 1.90481100  |
| C | 4.08770900  | 6.91464500 | 0.00317000  |
| C | 5.16438900  | 5.99692800 | -0.54762800 |
| C | 6.50938100  | 6.12301500 | -0.10932900 |
| H | 6.74929400  | 6.85009500 | 0.67665600  |
| C | 7.53417900  | 5.32786700 | -0.67503700 |
| H | 8.56794500  | 5.43825000 | -0.32567800 |
| C | 7.22737500  | 4.39370100 | -1.69370500 |
| H | 8.02002700  | 3.77736600 | -2.13468000 |
| C | 5.88884600  | 4.26084300 | -2.13749100 |
| H | 5.64302900  | 3.54022100 | -2.92641600 |
| C | 4.86694300  | 5.05670900 | -1.56981400 |
| H | 3.83133800  | 4.94895700 | -1.91666200 |
| C | 3.82013200  | 8.14125900 | -0.88179600 |
| H | 4.74154200  | 8.74892700 | -0.96226000 |
| H | 3.01363800  | 8.76377900 | -0.46032800 |
| H | 3.52986500  | 7.83205100 | -1.90376600 |
| C | -5.36615600 | 3.70145100 | 0.45914100  |
| C | -5.83230400 | 2.27388300 | 0.38435300  |



|   |             |             |             |
|---|-------------|-------------|-------------|
| H | -5.16003100 | 1.57881000  | -0.13421500 |
| C | -7.33892500 | 1.98696500  | 0.23423700  |
| H | -7.98195000 | 2.87374900  | 0.22520200  |
| H | -7.61726600 | 1.18535300  | -0.45706600 |
| C | -6.66144100 | 1.63522200  | 1.55920600  |
| C | -6.36897900 | 0.17803100  | 1.86605700  |
| C | -5.07017700 | -0.23377900 | 2.26834700  |
| H | -4.25670300 | 0.50140300  | 2.31298800  |
| C | -4.81013600 | -1.58253400 | 2.60983600  |
| H | -3.80058400 | -1.87665200 | 2.91989000  |
| C | -5.85324500 | -2.54033000 | 2.56050500  |
| H | -5.65362800 | -3.58709900 | 2.81832300  |
| C | -7.15411000 | -2.13855500 | 2.16880600  |
| H | -7.96600600 | -2.87518400 | 2.13203000  |
| C | -7.40836000 | -0.78921900 | 1.82543900  |
| H | -8.41542800 | -0.47939600 | 1.51854100  |
| C | -6.98242300 | 2.48224100  | 2.79937700  |
| H | -7.89048900 | 2.08977500  | 3.29543700  |
| H | -7.15683700 | 3.53681400  | 2.52538200  |
| H | -6.15206000 | 2.44162000  | 3.52986400  |
| C | -0.28021900 | -0.26648800 | 5.09146300  |
| C | -1.43768100 | -0.33971200 | 5.91785900  |
| C | -1.33169000 | -0.41719900 | 7.33235500  |
| H | -2.22296800 | -0.47096300 | 7.96325200  |
| C | -0.04949700 | -0.42666800 | 7.92176600  |
| H | 0.03957100  | -0.48567300 | 9.01266700  |

|   |             |             |             |
|---|-------------|-------------|-------------|
| C | 1.12067300  | -0.36318000 | 7.13532100  |
| H | 2.10178500  | -0.37205600 | 7.61739900  |
| C | 0.99506000  | -0.28454200 | 5.72266100  |
| C | -3.89841800 | -0.38960200 | 6.02228800  |
| C | 3.43904400  | -0.27671500 | 5.44263600  |
| H | 4.71962400  | 1.12231900  | -3.39475200 |
| H | 4.35711600  | 2.07522000  | -4.89208400 |
| H | 4.61620600  | 0.28229800  | -4.98518500 |
| H | -3.70157100 | -0.24519100 | -5.76659500 |
| H | -2.55371000 | -0.90071000 | -7.00115900 |
| H | -2.91079500 | 0.87598500  | -6.94120300 |
| H | 4.13140600  | -0.26043900 | 4.58934800  |
| H | 3.58095900  | -1.21419700 | 6.01353600  |
| H | 3.62357200  | 0.59683100  | 6.09743900  |
| H | -4.70743000 | -0.38442500 | 5.27812700  |
| H | -3.98311100 | 0.49286600  | 6.68543600  |
| H | -3.94639400 | -1.31919300 | 6.62181800  |
| C | 3.16204600  | -0.36999300 | -0.16345700 |
| C | 5.05620800  | -3.11154200 | -3.85811300 |
| C | 4.74728800  | -1.72241900 | -1.84819100 |
| C | 4.20505500  | -2.41246400 | -2.97489700 |
| C | 6.45647400  | -3.13023200 | -3.63951300 |
| C | 3.88847100  | -1.00288600 | -0.94675000 |
| C | 7.00320900  | -2.44843200 | -2.52374500 |
| C | 2.34388300  | 0.34881800  | 0.74861100  |
| C | 6.15926800  | -1.75314100 | -1.63024500 |

|   |            |             |             |
|---|------------|-------------|-------------|
| H | 6.57565900 | -1.23725100 | -0.75803400 |
| H | 8.08492200 | -2.46406900 | -2.34715400 |
| H | 7.11352400 | -3.67467100 | -4.32777400 |
| H | 3.12268400 | -2.38971100 | -3.14119700 |
| H | 4.62845100 | -3.64383900 | -4.71551000 |
| H | 1.88755200 | -0.10440500 | 1.63636700  |

### **Transition State TS1**

Temperature: 298.15 Kelvin

Pressure: 1.0 Atm

Imaginary Frequency: -367.2223 cm-1

G\_corr: 1.440841 Hartree

H\_corr: 1.71512 Hartree

SCF: -5194.303944 Hartree

S: 577.269 Cal/Mol-Kelvin

H: -5192.588824 Hartree

G: -5192.863103 Hartree

Cartesian Coordinates:

|    |             |             |             |
|----|-------------|-------------|-------------|
| N  | 2.62527600  | 1.31534700  | 0.68567000  |
| N  | 2.44061600  | 2.42454100  | 0.31906800  |
| Co | -0.19089100 | 0.06699100  | 0.17177000  |
| O  | 2.16242300  | -7.41637700 | 0.76345900  |
| O  | -5.36407500 | -5.31515400 | -1.61969000 |
| O  | -1.55536000 | 0.37034900  | -5.31742200 |
| O  | 3.00809700  | 0.52437000  | -3.95421500 |

|   |             |             |             |
|---|-------------|-------------|-------------|
| N | -0.26262400 | -1.19232900 | -1.34845100 |
| N | -0.12245600 | 1.56920500  | -1.11131700 |
| N | 1.13507800  | -5.38419200 | 0.16371600  |
| H | 1.30099500  | -4.37584100 | 0.07170200  |
| N | -3.47613500 | -4.14242700 | -0.83287100 |
| H | -3.12516500 | -3.19854700 | -0.63992000 |
| C | -0.85040100 | -3.33345000 | -0.16650500 |
| C | -0.52826300 | -2.57798600 | -1.31201200 |
| C | -0.38122400 | -3.16429800 | -2.63693400 |
| H | -0.55939700 | -4.21447600 | -2.86597900 |
| C | 0.01721400  | -2.14929200 | -3.48293300 |
| H | 0.21281700  | -2.19490200 | -4.55348900 |
| C | 0.07844300  | -0.93014200 | -2.69175700 |
| C | 0.34909000  | 0.33409200  | -3.24120600 |
| C | 0.17875200  | 1.50769800  | -2.48880700 |
| C | 0.15533600  | 2.83653300  | -3.08043800 |
| H | 0.35360600  | 3.04257200  | -4.13139700 |
| C | -0.20399400 | 3.71905400  | -2.08304600 |
| H | -0.34765900 | 4.79720300  | -2.14399700 |
| C | -0.34325700 | 2.94266800  | -0.85926000 |
| C | -1.18736300 | -4.79651900 | -0.31441500 |
| C | -0.19938500 | -5.80943100 | -0.10772500 |
| C | -0.54885100 | -7.18437900 | -0.20888100 |
| H | 0.21343500  | -7.94163300 | -0.02139800 |
| C | -1.87436700 | -7.53220300 | -0.54270800 |
| H | -2.13956400 | -8.59258500 | -0.62653700 |

|   |             |             |             |
|---|-------------|-------------|-------------|
| C | -2.86812800 | -6.55822500 | -0.77382300 |
| H | -3.89053300 | -6.82780400 | -1.04329800 |
| C | -2.52363600 | -5.18521300 | -0.65028600 |
| C | 2.23841800  | -6.16646400 | 0.53011100  |
| C | 3.53633200  | -5.40782100 | 0.59953400  |
| H | 3.55148200  | -4.44094200 | 0.08304200  |
| C | 4.83691600  | -6.24077200 | 0.52551600  |
| H | 5.64274800  | -5.84554400 | -0.10111500 |
| H | 4.68614700  | -7.32517000 | 0.49352200  |
| C | 4.49642700  | -5.52569800 | 1.83584000  |
| C | 5.31735100  | -4.29443200 | 2.18131900  |
| C | 6.68540700  | -4.45402000 | 2.53711700  |
| H | 7.12695800  | -5.45880600 | 2.52621300  |
| C | 7.48111700  | -3.33843500 | 2.88490600  |
| H | 8.53501100  | -3.48084700 | 3.15301700  |
| C | 6.92181600  | -2.03591400 | 2.87602600  |
| H | 7.53986000  | -1.16674800 | 3.13083200  |
| C | 5.56085500  | -1.86572900 | 2.52549400  |
| H | 5.12297300  | -0.86036100 | 2.49269700  |
| C | 4.76405400  | -2.98852300 | 2.19087100  |
| H | 3.71182300  | -2.84486700 | 1.91953700  |
| C | 4.06737700  | -6.35977500 | 3.05113900  |
| H | 4.95945900  | -6.71404100 | 3.60185900  |
| H | 3.47505500  | -7.23612800 | 2.73773600  |
| H | 3.45893200  | -5.75194100 | 3.74721100  |
| C | -4.79919900 | -4.22405800 | -1.28555000 |

|   |             |             |             |
|---|-------------|-------------|-------------|
| C | -5.48596200 | -2.88848600 | -1.35670000 |
| H | -5.06899000 | -2.10280700 | -0.71418100 |
| C | -7.01392100 | -2.84988300 | -1.55834100 |
| H | -7.49250900 | -3.82845400 | -1.67338500 |
| H | -7.56606300 | -2.11097700 | -0.96913900 |
| C | -6.11772700 | -2.37552100 | -2.70288500 |
| C | -6.00529300 | -0.88524700 | -2.96783700 |
| C | -4.73729200 | -0.24887600 | -3.03468800 |
| H | -3.82704000 | -0.83206800 | -2.84649900 |
| C | -4.63321800 | 1.13030800  | -3.33550200 |
| H | -3.64446300 | 1.60222400  | -3.37750500 |
| C | -5.80127500 | 1.89265600  | -3.58463200 |
| H | -5.72375200 | 2.96272000  | -3.81030800 |
| C | -7.07045900 | 1.26547400  | -3.52954900 |
| H | -7.97837500 | 1.84969600  | -3.72280900 |
| C | -7.16955100 | -0.11270200 | -3.22340500 |
| H | -8.15359100 | -0.59613500 | -3.17477000 |
| C | -6.00874500 | -3.24459700 | -3.96428100 |
| H | -6.83252400 | -2.99811900 | -4.66086100 |
| H | -6.06726200 | -4.31755300 | -3.71321000 |
| H | -5.05303900 | -3.05721000 | -4.48982000 |
| C | 0.74630800  | 0.43879600  | -4.68720500 |
| C | -0.21651600 | 0.44781700  | -5.73568300 |
| C | 0.17768800  | 0.53235800  | -7.09839300 |
| H | -0.56442900 | 0.53994000  | -7.90112700 |
| C | 1.55211900  | 0.60941100  | -7.41016400 |

|   |             |             |             |
|---|-------------|-------------|-------------|
| H | 1.86122600  | 0.67343200  | -8.45992500 |
| C | 2.53562200  | 0.60809600  | -6.39812000 |
| H | 3.59449100  | 0.66849400  | -6.66365500 |
| C | 2.12318900  | 0.52661300  | -5.04132200 |
| C | -2.59715300 | 0.34717700  | -6.35842300 |
| C | 4.44987800  | 0.56711300  | -4.23777500 |
| O | 2.61182800  | 7.53611100  | 1.17484600  |
| O | -5.26323600 | 5.60254300  | 0.67830100  |
| O | -2.71970300 | 0.04267200  | 5.17163300  |
| O | 1.98190800  | -0.73027300 | 4.95006600  |
| N | -0.42121900 | 1.35899200  | 1.65840400  |
| N | -0.58798700 | -1.41068400 | 1.42586800  |
| N | 1.49463000  | 5.54019100  | 0.59590800  |
| H | 1.64562500  | 4.54021300  | 0.40685500  |
| N | -3.25403000 | 4.40062100  | 0.39031600  |
| H | -2.88400500 | 3.45249300  | 0.26729700  |
| C | -0.58754900 | 3.52514500  | 0.39912100  |
| C | -0.54635900 | 2.76241400  | 1.58312000  |
| C | -0.58004900 | 3.34778900  | 2.91645200  |
| H | -0.67915600 | 4.41421500  | 3.11490500  |
| C | -0.43974000 | 2.31107700  | 3.81514800  |
| H | -0.41452700 | 2.35500600  | 4.90283900  |
| C | -0.37600200 | 1.07995900  | 3.04196100  |
| C | -0.40727600 | -0.20114300 | 3.61893400  |
| C | -0.58133000 | -1.35667700 | 2.83745500  |
| C | -0.85923400 | -2.66894500 | 3.39950200  |

|   |             |             |             |
|---|-------------|-------------|-------------|
| H | -0.91904100 | -2.87776800 | 4.46666000  |
| C | -1.05139600 | -3.53361700 | 2.34187200  |
| H | -1.28892600 | -4.59634200 | 2.36471300  |
| C | -0.84878800 | -2.76425600 | 1.12181000  |
| C | -0.89368100 | 4.99894700  | 0.49391200  |
| C | 0.13807000  | 5.98327600  | 0.60920600  |
| C | -0.20403800 | 7.36009900  | 0.73227200  |
| H | 0.59455600  | 8.09492800  | 0.83793600  |
| C | -1.56228400 | 7.73799100  | 0.73865000  |
| H | -1.81655000 | 8.79996400  | 0.83587000  |
| C | -2.60225700 | 6.79235200  | 0.62645600  |
| H | -3.65409100 | 7.08226600  | 0.64066600  |
| C | -2.26377500 | 5.41858000  | 0.50415700  |
| C | 2.64356800  | 6.29843600  | 0.86983700  |
| C | 3.92841800  | 5.52431000  | 0.79328600  |
| H | 3.82722200  | 4.43962100  | 0.67815600  |
| C | 5.11740400  | 6.01442600  | 1.65753900  |
| H | 5.69900900  | 5.24590700  | 2.17771100  |
| H | 4.93188600  | 6.93489300  | 2.22103000  |
| C | 5.22261800  | 6.13915100  | 0.14065500  |
| C | 6.12671300  | 5.17063800  | -0.60071200 |
| C | 7.46777600  | 4.97022900  | -0.17858800 |
| H | 7.82309500  | 5.47307100  | 0.72964600  |
| C | 8.34378700  | 4.13873900  | -0.91608100 |
| H | 9.37685200  | 3.99527200  | -0.57677500 |
| C | 7.89026200  | 3.49740900  | -2.09389300 |



|   |             |             |             |
|---|-------------|-------------|-------------|
| H | 8.56850600  | 2.85588400  | -2.66933900 |
| C | 6.55394200  | 3.69049100  | -2.52232400 |
| H | 6.19579800  | 3.20057700  | -3.43580500 |
| C | 5.68049400  | 4.52001300  | -1.78175300 |
| H | 4.64484600  | 4.66253800  | -2.11533500 |
| C | 5.17394900  | 7.53385200  | -0.50175600 |
| H | 6.18777900  | 7.97765800  | -0.49997100 |
| H | 4.48675000  | 8.19792900  | 0.04771200  |
| H | 4.83606200  | 7.46965000  | -1.55340600 |
| C | -4.64707600 | 4.50493100  | 0.48553200  |
| C | -5.34929800 | 3.18144700  | 0.35737800  |
| H | -4.78565400 | 2.38939900  | -0.15178200 |
| C | -6.87545000 | 3.16238800  | 0.13989900  |
| H | -7.35548200 | 4.14697400  | 0.12904600  |
| H | -7.25732600 | 2.43389100  | -0.58229700 |
| C | -6.32607700 | 2.67388700  | 1.48077300  |
| C | -6.30306000 | 1.18244700  | 1.76094800  |
| C | -5.10817200 | 0.53820300  | 2.17954600  |
| H | -4.17770300 | 1.11512000  | 2.25458700  |
| C | -5.10090400 | -0.84109400 | 2.49738300  |
| H | -4.16716700 | -1.31703100 | 2.81911800  |
| C | -6.29660600 | -1.59599200 | 2.40809200  |
| H | -6.29302900 | -2.66569900 | 2.64843300  |
| C | -7.49546200 | -0.96140200 | 1.99910600  |
| H | -8.42488400 | -1.54001000 | 1.93158500  |
| C | -7.49692400 | 0.41718600  | 1.67908000  |

|   |             |             |             |
|---|-------------|-------------|-------------|
| H | -8.42502400 | 0.90689300  | 1.35789800  |
| C | -6.55147900 | 3.53952300  | 2.72920800  |
| H | -7.53397100 | 3.29925400  | 3.17825400  |
| H | -6.53063100 | 4.61336800  | 2.47633900  |
| H | -5.77297300 | 3.34276200  | 3.49076400  |
| C | -0.36480400 | -0.33217600 | 5.11546200  |
| C | -1.54458400 | -0.19671600 | 5.90175400  |
| C | -1.50561800 | -0.30741600 | 7.31732100  |
| H | -2.41306700 | -0.19972600 | 7.91748100  |
| C | -0.26933900 | -0.56257500 | 7.94837400  |
| H | -0.23161400 | -0.64788200 | 9.04053000  |
| C | 0.91896000  | -0.71182100 | 7.20213600  |
| H | 1.86360900  | -0.90920200 | 7.71559200  |
| C | 0.86156800  | -0.59719000 | 5.78719900  |
| C | -3.97360400 | 0.21244100  | 5.92505300  |
| C | 3.27388700  | -1.03420500 | 5.58775100  |
| H | 4.93005200  | 0.55809500  | -3.24940500 |
| H | 4.72092900  | 1.49227800  | -4.78367900 |
| H | 4.76693600  | -0.32152600 | -4.81622600 |
| H | -3.54450400 | 0.27624000  | -5.80540400 |
| H | -2.47700600 | -0.53135500 | -7.02143400 |
| H | -2.58037400 | 1.27755700  | -6.95847500 |
| H | 3.98490200  | -1.13980400 | 4.75669900  |
| H | 3.22457300  | -1.98379200 | 6.15443400  |
| H | 3.58948300  | -0.21028000 | 6.25669900  |
| H | -4.74186800 | 0.37512000  | 5.15590900  |

|   |             |             |             |
|---|-------------|-------------|-------------|
| H | -3.91581800 | 1.08854500  | 6.59939600  |
| H | -4.21405000 | -0.69784300 | 6.50764600  |
| C | 2.51622400  | -1.01902600 | -0.24852000 |
| C | 4.58905800  | -3.68110700 | -3.91324100 |
| C | 4.16141900  | -2.38991700 | -1.85893500 |
| C | 3.69822000  | -2.97282200 | -3.07911900 |
| C | 5.95501400  | -3.81327300 | -3.55744200 |
| C | 3.26926100  | -1.66072500 | -1.00506500 |
| C | 6.42412100  | -3.23614800 | -2.35072300 |
| C | 1.73175300  | -0.15649900 | 0.58371300  |
| C | 5.53939500  | -2.53654400 | -1.50229600 |
| H | 5.89795500  | -2.10132500 | -0.56314800 |
| H | 7.47814600  | -3.33751700 | -2.06731900 |
| H | 6.64339700  | -4.36377700 | -4.20922300 |
| H | 2.64346600  | -2.86358900 | -3.35124500 |
| H | 4.21890300  | -4.13166200 | -4.84151700 |
| H | 1.75721600  | -0.41634600 | 1.65881500  |

### **Intermediate C**

**C**<sub>[Co(III)(P6)]</sub>

Temperature: 298.15 Kelvin

Pressure: 1.0 Atm

G\_corr: 1.434835 Hartree

H\_corr: 1.705227 Hartree

SCF: -6325.50188201 Hartree

S: 569.087 Cal/Mol-Kelvin

H: -6323.796655 Hartree

G: -6324.067047 Hartree

Cartesian Coordinates:

|    |             |             |             |
|----|-------------|-------------|-------------|
| Co | -0.21374200 | 0.10003500  | 0.14770900  |
| O  | 2.68689800  | -7.11820800 | 1.10494100  |
| O  | -5.13740600 | -5.73513500 | -0.84532600 |
| O  | -1.85809100 | -0.14473700 | -5.26259100 |
| O  | 2.76036800  | 0.34977000  | -4.19791200 |
| N  | -0.29462300 | -1.28312900 | -1.26404300 |
| N  | -0.21625000 | 1.49450000  | -1.26147000 |
| N  | 1.45134700  | -5.20941600 | 0.49210300  |
| H  | 1.52796900  | -4.19784200 | 0.33891800  |
| N  | -3.28329300 | -4.37929300 | -0.31391900 |
| H  | -2.98512000 | -3.40141800 | -0.23576100 |
| C  | -0.69086000 | -3.34236700 | 0.12129200  |
| C  | -0.46829800 | -2.67344600 | -1.09731600 |
| C  | -0.34516300 | -3.36672500 | -2.37217300 |
| H  | -0.46129400 | -4.44251000 | -2.49863200 |
| C  | -0.05586500 | -2.40928300 | -3.32164400 |
| H  | 0.09925500  | -2.53827000 | -4.39185700 |
| C  | -0.03316800 | -1.12371600 | -2.64173400 |
| C  | 0.15843000  | 0.09599800  | -3.30950300 |
| C  | 0.01807700  | 1.32280300  | -2.64303800 |
| C  | -0.00379400 | 2.60328300  | -3.33267200 |

|   |             |             |             |
|---|-------------|-------------|-------------|
| H | 0.14412600  | 2.72283500  | -4.40499700 |
| C | -0.27647600 | 3.56968700  | -2.38782200 |
| H | -0.39201300 | 4.64454400  | -2.52263100 |
| C | -0.37932900 | 2.88895400  | -1.10376100 |
| C | -0.92942000 | -4.83187400 | 0.11319500  |
| C | 0.14260700  | -5.75176400 | 0.33437100  |
| C | -0.10879500 | -7.15152500 | 0.36257500  |
| H | 0.71887500  | -7.83542800 | 0.55543400  |
| C | -1.42278200 | -7.61628300 | 0.14468500  |
| H | -1.61282800 | -8.69583000 | 0.16139000  |
| C | -2.49904800 | -6.73636800 | -0.09626700 |
| H | -3.51297500 | -7.09776400 | -0.27525500 |
| C | -2.25026400 | -5.33752400 | -0.10490100 |
| C | 2.63921600  | -5.87788900 | 0.81890700  |
| C | 3.86266900  | -5.00357100 | 0.78355900  |
| H | 3.76110000  | -4.06304100 | 0.22898000  |
| C | 5.23258600  | -5.71119800 | 0.67488800  |
| H | 5.96301100  | -5.26742300 | -0.00889400 |
| H | 5.18852900  | -6.80550900 | 0.69380600  |
| C | 4.88676000  | -4.97584300 | 1.97264300  |
| C | 5.59506600  | -3.65730500 | 2.23398400  |
| C | 6.98531200  | -3.66925800 | 2.53486400  |
| H | 7.52359500  | -4.62581200 | 2.53625500  |
| C | 7.67973600  | -2.46970400 | 2.81277000  |
| H | 8.75264400  | -2.49861100 | 3.03869200  |

|   |             |             |             |
|---|-------------|-------------|-------------|
| C | 6.99333800  | -1.22972500 | 2.78858800  |
| H | 7.53131900  | -0.29554800 | 2.98955700  |
| C | 5.60956300  | -1.20685700 | 2.49111900  |
| H | 5.07209600  | -0.25159000 | 2.44802400  |
| C | 4.91491500  | -2.41258600 | 2.22480300  |
| H | 3.84391000  | -2.37913700 | 1.99348300  |
| C | 4.59958100  | -5.79617600 | 3.23837400  |
| H | 5.54723900  | -6.03583100 | 3.75721100  |
| H | 4.08558300  | -6.73987300 | 2.98863800  |
| H | 3.96493900  | -5.22278100 | 3.94039600  |
| C | -4.62401400 | -4.58458400 | -0.66200700 |
| C | -5.39834800 | -3.30458300 | -0.81951300 |
| H | -4.99243300 | -2.43243300 | -0.29124500 |
| C | -6.93541200 | -3.37241600 | -0.91913200 |
| H | -7.35895800 | -4.38246600 | -0.90105100 |
| H | -7.49565300 | -2.60555400 | -0.37492100 |
| C | -6.14208000 | -2.97277600 | -2.16445000 |
| C | -6.14089300 | -1.51504600 | -2.58782300 |
| C | -4.92437900 | -0.80352600 | -2.76197100 |
| H | -3.97008500 | -1.29910100 | -2.54355100 |
| C | -4.92748400 | 0.53933000  | -3.20940800 |
| H | -3.97653300 | 1.07103600  | -3.33293300 |
| C | -6.15303900 | 1.18790700  | -3.50069800 |
| H | -6.15776900 | 2.22926300  | -3.84398900 |
| C | -7.37205800 | 0.48392900  | -3.33910500 |

|   |             |             |             |
|---|-------------|-------------|-------------|
| H | -8.32445100 | 0.97907400  | -3.56462200 |
| C | -7.36377100 | -0.85648000 | -2.88576100 |
| H | -8.30908600 | -1.39804800 | -2.75348700 |
| C | -6.05859000 | -3.96308100 | -3.33526900 |
| H | -6.93724900 | -3.83658300 | -3.99596000 |
| H | -6.03609300 | -5.00511500 | -2.97289500 |
| H | -5.15045400 | -3.78075000 | -3.94075900 |
| C | 0.46908600  | 0.09104200  | -4.78068500 |
| C | -0.55016300 | -0.04076800 | -5.76552700 |
| C | -0.23833400 | -0.06031500 | -7.15187900 |
| H | -1.02387800 | -0.16053900 | -7.90553200 |
| C | 1.11023100  | 0.05467700  | -7.55234800 |
| H | 1.35580400  | 0.03874500  | -8.62057200 |
| C | 2.14766200  | 0.19202400  | -6.60577600 |
| H | 3.18536600  | 0.27937300  | -6.93884800 |
| C | 1.81768200  | 0.21276800  | -5.22432900 |
| C | -2.95049700 | -0.32544100 | -6.23397700 |
| C | 4.18256700  | 0.40805800  | -4.56609100 |
| O | 2.72894900  | 7.50999700  | 0.69402100  |
| O | -5.21082700 | 5.75121500  | 0.15960200  |
| O | -2.65074400 | 0.47924300  | 5.16945200  |
| O | 2.05498800  | -0.28480400 | 4.97749300  |
| N | -0.41431800 | 1.50407000  | 1.53640700  |
| N | -0.50573400 | -1.27547000 | 1.53769200  |
| N | 1.53443200  | 5.53742000  | 0.21633900  |

|   |             |             |             |
|---|-------------|-------------|-------------|
| H | 1.63283100  | 4.52385800  | 0.09478600  |
| N | -3.22107500 | 4.49330700  | 0.01538200  |
| H | -2.86731200 | 3.53166900  | -0.01663500 |
| C | -0.56713600 | 3.57016700  | 0.11404100  |
| C | -0.52076500 | 2.89992200  | 1.35166600  |
| C | -0.53898000 | 3.59161500  | 2.63323200  |
| H | -0.62760200 | 4.67131500  | 2.74633000  |
| C | -0.40527100 | 2.62868200  | 3.61068500  |
| H | -0.37183800 | 2.75821000  | 4.69127500  |
| C | -0.35217900 | 1.33985200  | 2.93872700  |
| C | -0.34827200 | 0.11359400  | 3.62233900  |
| C | -0.47350800 | -1.10614700 | 2.93949800  |
| C | -0.65564500 | -2.38117100 | 3.61495700  |
| H | -0.68185500 | -2.50191600 | 4.69689200  |
| C | -0.80411200 | -3.34202700 | 2.63801500  |
| H | -0.96849900 | -4.41252800 | 2.75241600  |
| C | -0.68068900 | -2.66409300 | 1.35457000  |
| C | -0.85302600 | 5.05228000  | 0.10161100  |
| C | 0.19381200  | 6.02233900  | 0.16919300  |
| C | -0.11260900 | 7.41103100  | 0.18892000  |
| H | 0.70129800  | 8.13378400  | 0.25744500  |
| C | -1.46329200 | 7.81536900  | 0.14125700  |
| H | -1.69731900 | 8.88619800  | 0.15753000  |
| C | -2.52139200 | 6.88475900  | 0.07729600  |
| H | -3.56664100 | 7.19731100  | 0.05192500  |



|   |             |            |             |
|---|-------------|------------|-------------|
| C | -2.21332200 | 5.49781800 | 0.06003500  |
| C | 2.70981200  | 6.25460700 | 0.47787100  |
| C | 3.95209300  | 5.40972000 | 0.50195000  |
| H | 3.79826300  | 4.32364400 | 0.46559700  |
| C | 5.13886100  | 5.89839700 | 1.37056400  |
| H | 5.65993300  | 5.14150200 | 1.96609700  |
| H | 4.98389100  | 6.86576300 | 1.85978000  |
| C | 5.30036800  | 5.90413200 | -0.14601900 |
| C | 6.17348700  | 4.83666700 | -0.78126900 |
| C | 7.48006200  | 4.58553200 | -0.28503500 |
| H | 7.82827500  | 5.12630500 | 0.60393800  |
| C | 8.33247600  | 3.65597600 | -0.92687800 |
| H | 9.33922500  | 3.47387100 | -0.53184500 |
| C | 7.88948200  | 2.96538300 | -2.08042900 |
| H | 8.54849100  | 2.24559200 | -2.58029900 |
| C | 6.58773400  | 3.20925300 | -2.58268200 |
| H | 6.23877800  | 2.67995100 | -3.47721200 |
| C | 5.73795900  | 4.13774300 | -1.93848100 |
| H | 4.72946900  | 4.32110700 | -2.33079600 |
| C | 5.34478300  | 7.24749700 | -0.88999500 |
| H | 6.38024100  | 7.63758200 | -0.88436700 |
| H | 4.67759800  | 7.98584700 | -0.41583700 |
| H | 5.03794700  | 7.12154800 | -1.94539500 |
| C | -4.61365300 | 4.62959000 | 0.08266100  |
| C | -5.33560000 | 3.31077000 | 0.08124500  |

|   |             |             |             |
|---|-------------|-------------|-------------|
| H | -4.78035100 | 2.46275600  | -0.33961900 |
| C | -6.86119100 | 3.28810500  | -0.13946200 |
| H | -7.32990200 | 4.27169300  | -0.25275000 |
| H | -7.25058300 | 2.49283300  | -0.78315000 |
| C | -6.32233400 | 2.93231100  | 1.24680200  |
| C | -6.31720400 | 1.47702800  | 1.67811400  |
| C | -5.12783100 | 0.86194200  | 2.15205900  |
| H | -4.18917400 | 1.43034400  | 2.16109600  |
| C | -5.13617400 | -0.47772400 | 2.60860200  |
| H | -4.20562800 | -0.93226600 | 2.96855200  |
| C | -6.34292200 | -1.22032900 | 2.60602500  |
| H | -6.35198600 | -2.25946900 | 2.95584100  |
| C | -7.53657700 | -0.61330600 | 2.14329100  |
| H | -8.47501800 | -1.18127800 | 2.14340900  |
| C | -7.52192700 | 0.72491100  | 1.68330800  |
| H | -8.44575500 | 1.19149000  | 1.31859200  |
| C | -6.54081200 | 3.92339000  | 2.39946300  |
| H | -7.52794700 | 3.74217400  | 2.86559100  |
| H | -6.50543700 | 4.96578700  | 2.03939700  |
| H | -5.76817100 | 3.79487500  | 3.18121200  |
| C | -0.29313300 | 0.10920400  | 5.12472700  |
| C | -1.46792900 | 0.30340200  | 5.90635000  |
| C | -1.41915500 | 0.30588200  | 7.32599400  |
| H | -2.32329800 | 0.45629600  | 7.92183300  |
| C | -0.17816000 | 0.10565600  | 7.96737100  |

|   |             |             |             |
|---|-------------|-------------|-------------|
| H | -0.13347600 | 0.10665900  | 9.06260000  |
| C | 1.00583400  | -0.09728700 | 7.22727500  |
| H | 1.95509200  | -0.24917800 | 7.74776300  |
| C | 0.93940700  | -0.09489900 | 5.80799500  |
| C | -3.89671900 | 0.71194500  | 5.91942800  |
| C | 3.34779800  | -0.56347100 | 5.62501100  |
| H | 4.71441500  | 0.47620600  | -3.60689000 |
| H | 4.39580200  | 1.29886300  | -5.18976200 |
| H | 4.49336300  | -0.51210800 | -5.09608500 |
| H | -3.86078200 | -0.40015500 | -5.62233200 |
| H | -2.81043700 | -1.25329100 | -6.82156400 |
| H | -3.02473800 | 0.54439500  | -6.91510900 |
| H | 4.04956200  | -0.73667800 | 4.79716900  |
| H | 3.28892900  | -1.47018600 | 6.25731400  |
| H | 3.68168300  | 0.29969300  | 6.23316500  |
| H | -4.67238000 | 0.81838900  | 5.14786100  |
| H | -3.82956400 | 1.63728700  | 6.52349700  |
| H | -4.13427700 | -0.14950700 | 6.57316700  |
| C | 2.53204200  | -0.72055400 | -0.36177200 |
| C | 4.77124900  | -3.61515300 | -3.75461400 |
| C | 4.27550900  | -2.11944800 | -1.84870900 |
| C | 3.83888900  | -2.91007200 | -2.96934600 |
| C | 6.15900800  | -3.55742900 | -3.45778400 |
| C | 3.34454200  | -1.40371500 | -1.05766300 |
| C | 6.60386600  | -2.78393000 | -2.35315300 |

|   |            |             |             |
|---|------------|-------------|-------------|
| C | 1.67169400 | 0.02005500  | 0.38433100  |
| C | 5.68413400 | -2.07638600 | -1.55416200 |
| H | 6.02892000 | -1.48949500 | -0.69574800 |
| H | 7.67277400 | -2.73862700 | -2.11248200 |
| H | 6.87913800 | -4.11104000 | -4.07135800 |
| H | 2.76852000 | -2.95293700 | -3.19749300 |
| H | 4.41830400 | -4.21787200 | -4.60005300 |
| H | 1.97646400 | 0.61102900  | 1.25892100  |

### C[N2]

Temperature: 298.15 Kelvin

Pressure: 1.0 Atm

G\_corr: -0.013594 Hartree

H\_corr: 0.008229 Hartree

SCF: -109.490074 Hartree

S: 45.93 Cal/Mol-Kelvin

H: -109.481845 Hartree

G: -109.503668 Hartree

Cartesian Coordinates:

|   |            |            |             |
|---|------------|------------|-------------|
| N | 0.00000000 | 0.00000000 | 0.57307000  |
| N | 0.00000000 | 0.00000000 | -0.57307000 |

### C[2a]

Temperature: 298.15 Kelvin

Pressure: 1.0 Atm

G\_corr: 0.099513 Hartree

H\_corr: 0.138461 Hartree

SCF: -309.600539 Hartree

S: 81.974 Cal/Mol-Kelvin

H: -309.462078 Hartree

G: -309.501026 Hartree

Cartesian Coordinates:

|   |             |             |             |
|---|-------------|-------------|-------------|
| C | -1.80367300 | -1.06029300 | 0.00000000  |
| C | -0.41103500 | -1.30025800 | 0.00000000  |
| C | 0.52368900  | -0.22415100 | 0.00000000  |
| C | -2.29347400 | 0.26752500  | 0.00000000  |
| C | 0.01393200  | 1.10796100  | 0.00000000  |
| C | -1.37608400 | 1.34941800  | 0.00000000  |
| H | -2.50370300 | -1.90413500 | 0.00000000  |
| H | -3.37285400 | 0.45913400  | 0.00000000  |
| H | -0.03630000 | -2.33249700 | 0.00000000  |
| H | 0.70708900  | 1.95750300  | 0.00000000  |
| H | -1.74926300 | 2.38061400  | 0.00000000  |
| C | 1.97164800  | -0.53998900 | 0.00000000  |
| C | 3.01280800  | 0.33989400  | 0.00000000  |
| H | 2.20893300  | -1.61528500 | 0.00000000  |
| H | 2.86955800  | 1.42734700  | -0.00000100 |
| H | 4.04967000  | -0.01332600 | 0.00000000  |

### **Transition State TS2**

Temperature: 298.15 Kelvin

Pressure: 1.0 Atm

Imaginary Frequency: -315.3313 cm-1

G\_corr: 1.557 Hartree

H\_corr: 1.844644 Hartree

SCF: -6635.302918 Hartree

S: 605.398 Cal/Mol-Kelvin

H: -6633.458274 Hartree

G: -6633.745918 Hartree

Cartesian Coordinates:

|    |             |             |             |
|----|-------------|-------------|-------------|
| Co | 0.39503800  | 0.00765600  | 0.06756300  |
| O  | -0.59689000 | 7.95663300  | -0.53101300 |
| O  | 6.27534600  | 3.96422600  | -2.37493100 |
| O  | 1.44993400  | -1.21877400 | -5.38664800 |
| O  | -2.96377100 | -0.34864900 | -3.83527000 |
| N  | 0.57616500  | 1.06462800  | -1.57973500 |
| N  | 0.19630100  | -1.61769400 | -1.04457100 |
| N  | -0.00174700 | 5.67890100  | -0.61930400 |
| H  | -0.36864500 | 4.72819100  | -0.49885200 |
| N  | 4.22083600  | 3.35363700  | -1.39017300 |
| H  | 3.69324300  | 2.54452600  | -1.04701500 |
| C  | 1.50425100  | 3.21103600  | -0.66366000 |
| C  | 1.04430400  | 2.38729500  | -1.71169000 |
| C  | 0.92579900  | 2.83791300  | -3.09241900 |
| H  | 1.24648900  | 3.81658000  | -3.44799600 |

|   |             |             |             |
|---|-------------|-------------|-------------|
| C | 0.33331300  | 1.81146400  | -3.79995800 |
| H | 0.09024200  | 1.76974900  | -4.86101700 |
| C | 0.14230600  | 0.70641800  | -2.87188300 |
| C | -0.27982400 | -0.57284200 | -3.26898600 |
| C | -0.15471800 | -1.67681000 | -2.40788000 |
| C | -0.24369200 | -3.05811000 | -2.85645700 |
| H | -0.49076300 | -3.35830100 | -3.87380900 |
| C | 0.09271700  | -3.85652700 | -1.78084000 |
| H | 0.17069100  | -4.94251700 | -1.73538100 |
| C | 0.31923500  | -2.96769100 | -0.64809700 |
| C | 2.12857100  | 4.54360900  | -0.99696700 |
| C | 1.38180100  | 5.76241300  | -0.95372500 |
| C | 2.01087300  | 7.00052600  | -1.26358100 |
| H | 1.42584400  | 7.91932700  | -1.20883000 |
| C | 3.37143800  | 7.00646100  | -1.63416800 |
| H | 3.85032700  | 7.96177600  | -1.87880900 |
| C | 4.13317400  | 5.82169500  | -1.70140100 |
| H | 5.18244700  | 5.82445700  | -2.00069400 |
| C | 3.51014600  | 4.58755700  | -1.37420600 |
| C | -0.91978400 | 6.72636600  | -0.45477000 |
| C | -2.32991000 | 6.27547000  | -0.20112400 |
| H | -2.54428400 | 5.22222000  | -0.41689600 |
| C | -3.46021400 | 7.28033900  | -0.53056700 |
| H | -4.34341500 | 6.87653700  | -1.03551100 |
| H | -3.11638900 | 8.26412500  | -0.86758100 |

|   |             |             |             |
|---|-------------|-------------|-------------|
| C | -3.20717900 | 6.91727800  | 0.93255000  |
| C | -4.21187000 | 6.00182900  | 1.60952000  |
| C | -5.54884900 | 6.44926600  | 1.79186900  |
| H | -5.84233300 | 7.42993400  | 1.39582600  |
| C | -6.49807800 | 5.64511400  | 2.46385900  |
| H | -7.52565700 | 6.00551300  | 2.59544000  |
| C | -6.12334500 | 4.37320600  | 2.96377000  |
| H | -6.85854500 | 3.74452100  | 3.48055000  |
| C | -4.79419400 | 3.91910800  | 2.78681300  |
| H | -4.49555200 | 2.93276200  | 3.15841300  |
| C | -3.84497300 | 4.73033900  | 2.12021200  |
| H | -2.81825000 | 4.36826500  | 1.98753700  |
| C | -2.59383100 | 7.96711000  | 1.87032800  |
| H | -3.39114800 | 8.61672000  | 2.27899200  |
| H | -1.86248600 | 8.59533300  | 1.33455800  |
| H | -2.08537300 | 7.47969600  | 2.72361100  |
| C | 5.51095600  | 3.08307800  | -1.86469600 |
| C | 5.89749600  | 1.63652900  | -1.73262300 |
| H | 5.36489600  | 1.07145100  | -0.95758800 |
| C | 7.36425800  | 1.23154500  | -1.97099800 |
| H | 8.03121100  | 2.05048000  | -2.26124100 |
| H | 7.78600500  | 0.49417100  | -1.28091800 |
| C | 6.31693700  | 0.79372100  | -2.99490400 |
| C | 5.86281700  | -0.65424500 | -3.00549100 |
| C | 4.47933300  | -0.97671900 | -3.04654500 |



|   |             |             |             |
|---|-------------|-------------|-------------|
| H | 3.73306000  | -0.17240000 | -3.02555500 |
| C | 4.05026100  | -2.32361200 | -3.11021100 |
| H | 2.97792000  | -2.54889400 | -3.14413600 |
| C | 5.00433900  | -3.37128800 | -3.13880600 |
| H | 4.67492000  | -4.41617600 | -3.18046200 |
| C | 6.38583100  | -3.06088300 | -3.10575200 |
| H | 7.12840100  | -3.86770700 | -3.12723300 |
| C | 6.81011700  | -1.71179400 | -3.04142900 |
| H | 7.88079000  | -1.47238900 | -3.01688900 |
| C | 6.31364400  | 1.46246100  | -4.37722500 |
| H | 7.01870600  | 0.93640900  | -5.04863900 |
| H | 6.61632000  | 2.52133600  | -4.30672700 |
| H | 5.30773100  | 1.41421000  | -4.83602700 |
| C | -0.78004300 | -0.78565700 | -4.66880700 |
| C | 0.09569100  | -1.10846000 | -5.74234700 |
| C | -0.39490600 | -1.29915900 | -7.06203200 |
| H | 0.28084400  | -1.54413900 | -7.88597800 |
| C | -1.78030300 | -1.16713000 | -7.30108200 |
| H | -2.16481200 | -1.31315500 | -8.31724600 |
| C | -2.68036900 | -0.85230300 | -6.25999900 |
| H | -3.74920500 | -0.75629200 | -6.46972700 |
| C | -2.17118600 | -0.66380500 | -4.94717000 |
| C | 2.41938100  | -1.53305900 | -6.44910800 |
| C | -4.40581400 | -0.14126400 | -4.04624900 |
| O | -3.06082400 | -7.08189200 | 1.48078600  |

|   |             |             |            |
|---|-------------|-------------|------------|
| O | 4.96871000  | -5.70982700 | 1.76802400 |
| O | 2.81815700  | 0.87143700  | 5.10945200 |
| O | -1.91786700 | 0.99467600  | 4.60890100 |
| N | 0.50318600  | -1.12069200 | 1.67931300 |
| N | 0.94550800  | 1.55790700  | 1.14151000 |
| N | -1.69631400 | -5.29844400 | 0.76519900 |
| H | -1.72636300 | -4.35890500 | 0.35560000 |
| N | 3.10910400  | -4.46529000 | 1.02232000 |
| H | 2.83460000  | -3.53596300 | 0.68799800 |
| C | 0.51802400  | -3.42432400 | 0.67068500 |
| C | 0.52405600  | -2.53010100 | 1.76307500 |
| C | 0.50401000  | -2.95865800 | 3.15563800 |
| H | 0.53269700  | -3.99879700 | 3.47796400 |
| C | 0.42994100  | -1.81717100 | 3.92815300 |
| H | 0.39879800  | -1.73336500 | 5.01355500 |
| C | 0.45695500  | -0.68179500 | 3.01897200 |
| C | 0.56482100  | 0.65394500  | 3.44665100 |
| C | 0.87422400  | 1.68690700  | 2.54518900 |
| C | 1.27944700  | 3.02321500  | 2.95375100 |
| H | 1.31101000  | 3.36532500  | 3.98690600 |
| C | 1.63947200  | 3.70758800  | 1.81059100 |
| H | 2.01292500  | 4.72646500  | 1.71564000 |
| C | 1.39151900  | 2.81602300  | 0.68470200 |
| C | 0.71077400  | -4.89455300 | 0.95050400 |
| C | -0.39268000 | -5.79944700 | 1.05528900 |

|   |             |             |             |
|---|-------------|-------------|-------------|
| C | -0.17552400 | -7.15591500 | 1.42480200  |
| H | -1.03445300 | -7.81971000 | 1.53083900  |
| C | 1.14036400  | -7.60143400 | 1.66659100  |
| H | 1.30251100  | -8.64660200 | 1.95483700  |
| C | 2.25356400  | -6.74446900 | 1.54305600  |
| H | 3.27239500  | -7.08821300 | 1.72871700  |
| C | 2.03665900  | -5.38800800 | 1.18070700  |
| C | -2.93591900 | -5.93622400 | 0.93848700  |
| C | -4.10290900 | -5.14594200 | 0.42401400  |
| H | -3.89583800 | -4.10690900 | 0.13868900  |
| C | -5.49866000 | -5.40133800 | 1.03954700  |
| H | -6.10562200 | -4.51491100 | 1.24967700  |
| H | -5.53545800 | -6.19231100 | 1.79593000  |
| C | -5.25740800 | -5.83502000 | -0.40226600 |
| C | -5.86152100 | -5.01750800 | -1.52961300 |
| C | -7.22034800 | -4.60840600 | -1.48493100 |
| H | -7.81603900 | -4.82726500 | -0.59006800 |
| C | -7.81072000 | -3.93480800 | -2.58101500 |
| H | -8.86303100 | -3.62952600 | -2.53215500 |
| C | -7.04885900 | -3.66392600 | -3.74316800 |
| H | -7.50949600 | -3.15315700 | -4.59758600 |
| C | -5.69018700 | -4.06400000 | -3.79605000 |
| H | -5.09179700 | -3.86345200 | -4.69354700 |
| C | -5.10412500 | -4.73424400 | -2.69791000 |
| H | -4.05126200 | -5.04056600 | -2.74304700 |

|   |             |             |             |
|---|-------------|-------------|-------------|
| C | -5.17747900 | -7.33569400 | -0.72257900 |
| H | -6.19772400 | -7.73136600 | -0.88762300 |
| H | -4.70330700 | -7.89221000 | 0.10242200  |
| H | -4.59483300 | -7.51198700 | -1.64651700 |
| C | 4.47149000  | -4.63435900 | 1.30204900  |
| C | 5.29002700  | -3.40726500 | 1.01379100  |
| H | 4.85368700  | -2.70291600 | 0.29449000  |
| C | 6.82670600  | -3.52286000 | 0.99239400  |
| H | 7.22181700  | -4.51630800 | 1.23051700  |
| H | 7.34702500  | -2.97962400 | 0.19723200  |
| C | 6.17415100  | -2.74334400 | 2.13408100  |
| C | 6.23948600  | -1.22722100 | 2.11721800  |
| C | 5.06648800  | -0.44983800 | 2.31395700  |
| H | 4.09719900  | -0.94991200 | 2.43426100  |
| C | 5.13210600  | 0.96314000  | 2.35768500  |
| H | 4.21527700  | 1.54296800  | 2.51557500  |
| C | 6.37909300  | 1.62026100  | 2.21013100  |
| H | 6.43186000  | 2.71500900  | 2.23531000  |
| C | 7.55566100  | 0.85458200  | 2.02126400  |
| H | 8.52298800  | 1.35820400  | 1.90542600  |
| C | 7.48475900  | -0.55850700 | 1.97680800  |
| H | 8.39690500  | -1.15098800 | 1.83053100  |
| C | 6.18386000  | -3.35333000 | 3.54337900  |
| H | 7.12797200  | -3.09041000 | 4.05735100  |
| H | 6.09845800  | -4.45266600 | 3.50099900  |

|   |             |             |             |
|---|-------------|-------------|-------------|
| H | 5.34621300  | -2.95815700 | 4.14891500  |
| C | 0.44384000  | 0.96089800  | 4.91187000  |
| C | 1.58645400  | 1.07137500  | 5.75336400  |
| C | 1.45679300  | 1.35397400  | 7.13944300  |
| H | 2.33663100  | 1.43751200  | 7.78310000  |
| C | 0.16567200  | 1.52572500  | 7.68395500  |
| H | 0.05925700  | 1.74780400  | 8.75210300  |
| C | -0.99058700 | 1.41678700  | 6.88212700  |
| H | -1.97953700 | 1.55802900  | 7.32620600  |
| C | -0.84188900 | 1.13124900  | 5.49871200  |
| C | 4.04086600  | 0.93378700  | 5.92741800  |
| C | -3.27936100 | 1.04236000  | 5.16670400  |
| H | -4.79007800 | 0.16477100  | -3.06333300 |
| H | -4.89749700 | -1.07915500 | -4.36765200 |
| H | -4.58753800 | 0.66529300  | -4.78158500 |
| H | 3.39082500  | -1.57426100 | -5.93595600 |
| H | 2.43017900  | -0.74206700 | -7.22369100 |
| H | 2.19759200  | -2.51327500 | -6.91381300 |
| H | -3.93923600 | 0.79330100  | 4.32340400  |
| H | -3.51143700 | 2.05213300  | 5.55749600  |
| H | -3.40884600 | 0.28563300  | 5.96287400  |
| H | 4.85913300  | 0.73922400  | 5.21945300  |
| H | 4.02911600  | 0.15886500  | 6.71803400  |
| H | 4.16506800  | 1.93555200  | 6.38246500  |
| C | -2.11712100 | 1.45420100  | -0.32983100 |

|   |             |             |             |
|---|-------------|-------------|-------------|
| C | -4.01043500 | 4.18940700  | -4.04248700 |
| C | -3.61893800 | 3.02810600  | -1.89856900 |
| C | -3.18700300 | 3.39850900  | -3.21543400 |
| C | -5.28288200 | 4.62410800  | -3.58966300 |
| C | -2.80137500 | 2.21372500  | -1.06105500 |
| C | -5.72056400 | 4.26690000  | -2.28841900 |
| C | -1.45943500 | 0.48334500  | 0.42473100  |
| C | -4.90172600 | 3.48627100  | -1.44634300 |
| H | -5.23390100 | 3.22611900  | -0.43520900 |
| H | -6.69904800 | 4.60451100  | -1.92704200 |
| H | -5.91979700 | 5.23723500  | -4.23782500 |
| H | -2.20629100 | 3.05744700  | -3.56358700 |
| H | -3.66084400 | 4.47037200  | -5.04309000 |
| H | -1.61935500 | 0.46694100  | 1.51558600  |
| C | -5.41950500 | -2.16491600 | 4.69504000  |
| C | -6.24849900 | -1.45606700 | 3.78867300  |
| C | -4.10218900 | -2.51754300 | 4.30078400  |
| C | -3.61848000 | -2.17595500 | 3.02218600  |
| C | -4.44508700 | -1.47372900 | 2.08657800  |
| C | -5.76765300 | -1.11706600 | 2.50570100  |
| H | -2.59620000 | -2.45967100 | 2.74705200  |
| H | -5.79442600 | -2.44487000 | 5.68651100  |
| H | -3.45434800 | -3.06844200 | 4.99285300  |
| H | -6.41862300 | -0.57881700 | 1.80378200  |
| H | -7.26896000 | -1.17872400 | 4.07992400  |

|   |             |             |             |
|---|-------------|-------------|-------------|
| C | -4.02110500 | -1.14499800 | 0.72202200  |
| C | -2.77593800 | -1.38202800 | 0.14559500  |
| H | -2.01202100 | -1.96941500 | 0.66754100  |
| H | -2.64362400 | -1.27126200 | -0.93417500 |
| H | -4.77468400 | -0.63189000 | 0.10625100  |

### **Intermediate D**

Temperature: 298.15 Kelvin

Pressure: 1.0 Atm

G\_corr: 1.560918 Hartree

H\_corr: 1.847566 Hartree

SCF: -6635.34275100 Hartree

S: 603.302 Cal/Mol-Kelvin

H: -6633.455352 Hartree

G: -6633.742 Hartree

Cartesian Coordinates:

|    |             |             |             |
|----|-------------|-------------|-------------|
| Co | 0.34131200  | 0.00130900  | 0.04502300  |
| O  | -0.59700200 | 7.99426400  | -0.74827900 |
| O  | 6.14440300  | 3.80548300  | -2.62110400 |
| O  | 1.47897800  | -1.54803600 | -5.31160000 |
| O  | -2.94828100 | -0.54166200 | -3.88827500 |
| N  | 0.50839400  | 0.98273400  | -1.64953900 |
| N  | 0.20644900  | -1.67272300 | -0.98322800 |
| N  | -0.08381800 | 5.69714900  | -0.87348200 |

|   |             |             |             |
|---|-------------|-------------|-------------|
| H | -0.47677000 | 4.75916400  | -0.73698100 |
| N | 4.09827000  | 3.27008100  | -1.57672800 |
| H | 3.57025500  | 2.48744900  | -1.17760400 |
| C | 1.38094300  | 3.19420100  | -0.83415500 |
| C | 0.96129400  | 2.30328100  | -1.84491500 |
| C | 0.87039300  | 2.67418400  | -3.25130300 |
| H | 1.18581400  | 3.63628900  | -3.65376500 |
| C | 0.30815600  | 1.60163000  | -3.91410300 |
| H | 0.09058700  | 1.49814200  | -4.97655000 |
| C | 0.11180300  | 0.54720900  | -2.93019300 |
| C | -0.27851300 | -0.76005900 | -3.26377100 |
| C | -0.13616600 | -1.81360400 | -2.34387400 |
| C | -0.18539100 | -3.21858000 | -2.71857900 |
| H | -0.41809400 | -3.57877500 | -3.71969000 |
| C | 0.17208400  | -3.94939000 | -1.60212000 |
| H | 0.28504600  | -5.02863900 | -1.50132100 |
| C | 0.37147800  | -2.99619900 | -0.51717000 |
| C | 2.01939400  | 4.50313100  | -1.23101000 |
| C | 1.29560700  | 5.73662300  | -1.23230500 |
| C | 1.93904900  | 6.94854000  | -1.60814800 |
| H | 1.37088100  | 7.87909700  | -1.58337400 |
| C | 3.29318600  | 6.91565000  | -1.99900800 |
| H | 3.78323300  | 7.85025000  | -2.29592300 |
| C | 4.03477800  | 5.71672200  | -2.01889700 |
| H | 5.08009100  | 5.68849600  | -2.33038400 |



|   |             |            |             |
|---|-------------|------------|-------------|
| C | 3.39826000  | 4.50946000 | -1.62416300 |
| C | -0.95804100 | 6.77473700 | -0.67141800 |
| C | -2.37041200 | 6.36884100 | -0.36270200 |
| H | -2.63955400 | 5.33642600 | -0.61431900 |
| C | -3.47851300 | 7.42648300 | -0.56970000 |
| H | -4.40456800 | 7.08047300 | -1.03963400 |
| H | -3.12023300 | 8.41433700 | -0.87848000 |
| C | -3.15204900 | 6.98108700 | 0.85532800  |
| C | -4.13502500 | 6.05650600 | 1.55048100  |
| C | -5.47192900 | 6.48428400 | 1.77217300  |
| H | -5.78890400 | 7.46452400 | 1.39368400  |
| C | -6.39106400 | 5.66079600 | 2.46363700  |
| H | -7.41966500 | 6.00528600 | 2.62623400  |
| C | -5.98497900 | 4.39090300 | 2.94331000  |
| H | -6.69777200 | 3.74832500 | 3.47428800  |
| C | -4.65430200 | 3.95661000 | 2.72814900  |
| H | -4.32897500 | 2.97298400 | 3.08395200  |
| C | -3.73640200 | 4.78651200 | 2.04224500  |
| H | -2.70820500 | 4.44105100 | 1.87895900  |
| C | -2.44317100 | 7.96129100 | 1.80084900  |
| H | -3.18917700 | 8.61670000 | 2.28935400  |
| H | -1.72370800 | 8.59078300 | 1.25024600  |
| H | -1.90110100 | 7.41582200 | 2.59635400  |
| C | 5.38394300  | 2.96429800 | -2.04157600 |
| C | 5.77587700  | 1.53310900 | -1.80307300 |

|   |             |             |             |
|---|-------------|-------------|-------------|
| H | 5.24292500  | 1.02377200  | -0.99069400 |
| C | 7.24823000  | 1.12463000  | -2.00145200 |
| H | 7.90913100  | 1.92625300  | -2.34835000 |
| H | 7.67218400  | 0.44628000  | -1.25453900 |
| C | 6.21185200  | 0.60080900  | -2.99504400 |
| C | 5.77285000  | -0.84855000 | -2.89598200 |
| C | 4.39389400  | -1.18999800 | -2.93879900 |
| H | 3.63856300  | -0.39646500 | -3.00215400 |
| C | 3.98068800  | -2.54272400 | -2.89777400 |
| H | 2.91183200  | -2.78321800 | -2.93518500 |
| C | 4.94599500  | -3.57750700 | -2.81842900 |
| H | 4.62834600  | -4.62612500 | -2.77926800 |
| C | 6.32312700  | -3.24876700 | -2.78339000 |
| H | 7.07439900  | -4.04531800 | -2.72131200 |
| C | 6.73160100  | -1.89390200 | -2.82349800 |
| H | 7.79892200  | -1.64015800 | -2.79760400 |
| C | 6.21054400  | 1.16154100  | -4.42444600 |
| H | 6.92591800  | 0.59372200  | -5.04938600 |
| H | 6.50090300  | 2.22614100  | -4.43323600 |
| H | 5.20821500  | 1.06691100  | -4.88387700 |
| C | -0.75759900 | -1.05529000 | -4.65605700 |
| C | 0.13118400  | -1.45140200 | -5.69377800 |
| C | -0.34099600 | -1.72030600 | -7.00669600 |
| H | 0.34516900  | -2.02133300 | -7.80302700 |
| C | -1.72109300 | -1.59153500 | -7.27581800 |

|   |             |             |             |
|---|-------------|-------------|-------------|
| H | -2.09127600 | -1.79774700 | -8.28687500 |
| C | -2.63379900 | -1.20284000 | -6.27117400 |
| H | -3.69817100 | -1.10942900 | -6.50384800 |
| C | -2.14253500 | -0.93614200 | -4.96506200 |
| C | 2.46168900  | -1.93699600 | -6.33629600 |
| C | -4.38544000 | -0.34029600 | -4.13223100 |
| O | -2.92251700 | -7.05934500 | 1.75473100  |
| O | 5.07223500  | -5.47081300 | 2.14846500  |
| O | 2.65105400  | 1.29513100  | 5.02106900  |
| O | -2.08782100 | 1.05382900  | 4.55591800  |
| N | 0.48123200  | -1.02868200 | 1.71300500  |
| N | 0.78889300  | 1.63542500  | 1.04139800  |
| N | -1.57057600 | -5.29287100 | 0.97702000  |
| H | -1.60398600 | -4.38117300 | 0.50947500  |
| N | 3.20466600  | -4.33553300 | 1.26245900  |
| H | 2.91489600  | -3.43919100 | 0.85792500  |
| C | 0.59137300  | -3.37708500 | 0.82270600  |
| C | 0.56924800  | -2.42957000 | 1.86939100  |
| C | 0.56558700  | -2.78648000 | 3.28204600  |
| H | 0.64484200  | -3.80555900 | 3.65856300  |
| C | 0.42936700  | -1.61186400 | 3.99451400  |
| H | 0.38686200  | -1.47504200 | 5.07412600  |
| C | 0.40007100  | -0.52462400 | 3.02848600  |
| C | 0.41817200  | 0.83622900  | 3.38656400  |
| C | 0.68408700  | 1.83705800  | 2.43486400  |

|   |             |             |             |
|---|-------------|-------------|-------------|
| C | 1.03715900  | 3.20648500  | 2.78022200  |
| H | 1.03187700  | 3.60511900  | 3.79338900  |
| C | 1.41831700  | 3.83505700  | 1.61222300  |
| H | 1.77315500  | 4.85554600  | 1.47317400  |
| C | 1.22636300  | 2.87641900  | 0.53066700  |
| C | 0.81995400  | -4.82510200 | 1.18074000  |
| C | -0.26348300 | -5.74906600 | 1.32024900  |
| C | -0.02413600 | -7.07585400 | 1.77255200  |
| H | -0.86979600 | -7.75242600 | 1.90312900  |
| C | 1.29753800  | -7.47504900 | 2.06134500  |
| H | 1.47863300  | -8.49722900 | 2.41364400  |
| C | 2.39302800  | -6.60068500 | 1.90422100  |
| H | 3.41592300  | -6.90887100 | 2.12661600  |
| C | 2.15211700  | -5.27290700 | 1.45928300  |
| C | -2.80093800 | -5.94393300 | 1.15205400  |
| C | -3.96612100 | -5.20900200 | 0.55515400  |
| H | -3.77194300 | -4.17896700 | 0.23095600  |
| C | -5.38065100 | -5.47503300 | 1.11926000  |
| H | -6.02184400 | -4.59907900 | 1.26033000  |
| H | -5.43011800 | -6.23218800 | 1.90880900  |
| C | -5.06229500 | -5.96550700 | -0.28975500 |
| C | -5.63595100 | -5.21616000 | -1.47857200 |
| C | -7.01615100 | -4.88696600 | -1.53072900 |
| H | -7.65348600 | -5.11353600 | -0.66694900 |
| C | -7.57302200 | -4.28175200 | -2.68258700 |

|   |             |             |             |
|---|-------------|-------------|-------------|
| H | -8.64188500 | -4.03736900 | -2.70884000 |
| C | -6.75521000 | -4.00017900 | -3.80363600 |
| H | -7.18938300 | -3.54312700 | -4.70125600 |
| C | -5.37519700 | -4.31972200 | -3.75953700 |
| H | -4.73276600 | -4.10836400 | -4.62335700 |
| C | -4.82282800 | -4.92234700 | -2.60587700 |
| H | -3.75346900 | -5.16744500 | -2.57611000 |
| C | -4.92708800 | -7.47590600 | -0.53762600 |
| H | -5.92740400 | -7.90824000 | -0.73005100 |
| H | -4.47688500 | -7.98167200 | 0.33234800  |
| H | -4.29792600 | -7.67511500 | -1.42566400 |
| C | 4.56151500  | -4.44508800 | 1.59353000  |
| C | 5.35312900  | -3.21509500 | 1.24784700  |
| H | 4.92946500  | -2.58543600 | 0.45544500  |
| C | 6.89111700  | -3.27159400 | 1.31095400  |
| H | 7.30907000  | -4.22757500 | 1.64439200  |
| H | 7.43288200  | -2.77012400 | 0.50278000  |
| C | 6.15363400  | -2.43397800 | 2.35595100  |
| C | 6.16333900  | -0.92200200 | 2.22692700  |
| C | 4.95554100  | -0.18075300 | 2.33331000  |
| H | 4.00318000  | -0.70975000 | 2.46459300  |
| C | 4.96498000  | 1.23301800  | 2.27398600  |
| H | 4.02231200  | 1.78509800  | 2.36469700  |
| C | 6.18954600  | 1.92795700  | 2.11124800  |
| H | 6.19890800  | 3.02282600  | 2.05613700  |

|   |             |             |             |
|---|-------------|-------------|-------------|
| C | 7.39987100  | 1.19925600  | 2.01127500  |
| H | 8.34989900  | 1.73201300  | 1.88341200  |
| C | 7.38529900  | -0.21510300 | 2.07060900  |
| H | 8.32391300  | -0.77868300 | 1.99457000  |
| C | 6.11197200  | -2.93741400 | 3.80621300  |
| H | 7.01803400  | -2.59994700 | 4.34455000  |
| H | 6.06900200  | -4.03947300 | 3.84316100  |
| H | 5.23035800  | -2.53258900 | 4.33844600  |
| C | 0.27504200  | 1.20566700  | 4.83571900  |
| C | 1.41068900  | 1.43609900  | 5.66357200  |
| C | 1.26808000  | 1.76984800  | 7.03684900  |
| H | 2.14294900  | 1.94606000  | 7.66845300  |
| C | -0.02888200 | 1.86872400  | 7.58503800  |
| H | -0.14590100 | 2.12847600  | 8.64353400  |
| C | -1.17758100 | 1.63867800  | 6.79845800  |
| H | -2.17168900 | 1.72400800  | 7.24520100  |
| C | -1.01609100 | 1.30610800  | 5.42692100  |
| C | 3.86933400  | 1.47990700  | 5.82676900  |
| C | -3.44105700 | 1.00708600  | 5.13409200  |
| H | -4.78104600 | 0.02895600  | -3.17573300 |
| H | -4.87865400 | -1.29402500 | -4.40047600 |
| H | -4.55320300 | 0.41814700  | -4.92050800 |
| H | 3.42457900  | -1.95294800 | -5.80591300 |
| H | 2.49149300  | -1.19706200 | -7.15935500 |
| H | 2.23867100  | -2.94313300 | -6.74121200 |

|   |             |             |             |
|---|-------------|-------------|-------------|
| H | -4.09220500 | 0.69139500  | 4.30634500  |
| H | -3.74678300 | 2.00336300  | 5.50878700  |
| H | -3.49856800 | 0.26081900  | 5.94872300  |
| H | 4.69633300  | 1.30766500  | 5.12317000  |
| H | 3.91394200  | 0.74441500  | 6.65311400  |
| H | 3.92599900  | 2.50834200  | 6.23325800  |
| C | -2.21683900 | 1.33046700  | -0.45072900 |
| C | -3.87945000 | 4.13002300  | -4.21991500 |
| C | -3.55920800 | 3.01945500  | -2.04209500 |
| C | -3.12551100 | 3.28409500  | -3.37777300 |
| C | -5.08007000 | 4.72247400  | -3.75522000 |
| C | -2.81486600 | 2.13689000  | -1.18491100 |
| C | -5.51768800 | 4.46830900  | -2.43168400 |
| C | -1.66376200 | 0.29564200  | 0.39511100  |
| C | -4.76591000 | 3.63114500  | -1.57838800 |
| H | -5.09955300 | 3.44444200  | -0.55149100 |
| H | -6.44375600 | 4.92423800  | -2.06209800 |
| H | -5.66279300 | 5.37777500  | -4.41312100 |
| H | -2.19857000 | 2.82234900  | -3.73360300 |
| H | -3.52902700 | 4.32989300  | -5.23946000 |
| H | -1.59334300 | 0.61924000  | 1.44946600  |
| C | -5.53035500 | -2.38135200 | 4.50200900  |
| C | -6.30272200 | -1.57287300 | 3.62233400  |
| C | -4.17720700 | -2.66884000 | 4.17544700  |
| C | -3.59865800 | -2.17024700 | 2.99457200  |

|   |             |             |             |
|---|-------------|-------------|-------------|
| C | -4.36464800 | -1.35946400 | 2.07759700  |
| C | -5.73517300 | -1.07065800 | 2.43830100  |
| H | -2.54798800 | -2.39455000 | 2.78030500  |
| H | -5.97531800 | -2.78205500 | 5.42006900  |
| H | -3.57542500 | -3.29034200 | 4.84888700  |
| H | -6.33859300 | -0.45475500 | 1.75841500  |
| H | -7.34771400 | -1.34507300 | 3.86572200  |
| C | -3.84827400 | -0.85886000 | 0.83727800  |
| C | -2.45891300 | -1.05631900 | 0.29009700  |
| H | -1.90804100 | -1.83093200 | 0.84739400  |
| H | -2.50421400 | -1.35328600 | -0.77385100 |
| H | -4.51858800 | -0.23037500 | 0.23298400  |

### **Intermediate E**

$E_{[Co(II)(P6)]} = A_{[Co(II)(P6)]}$

$E_{[3a]}$

Temperature: 298.15 Kelvin

Pressure: 1.0 Atm

G\_corr: 0.203217 Hartree

H\_corr: 0.263701 Hartree

SCF: -656.05379 Hartree

S: 127.3 Cal/Mol-Kelvin

H: -655.790089 Hartree

G: -655.850573 Hartree



Cartesian Coordinates:

|   |             |             |             |
|---|-------------|-------------|-------------|
| H | 7.08964000  | -0.93150700 | 0.19645900  |
| C | 6.02993400  | -0.66768500 | 0.10154900  |
| H | 5.91657500  | 0.27931200  | 2.06376100  |
| H | 5.81903100  | -1.53397100 | -1.88981500 |
| C | 5.36773400  | 0.01416700  | 1.15235800  |
| C | 5.31293500  | -1.00617100 | -1.07285200 |
| C | 4.00342700  | 0.35644500  | 1.03363900  |
| C | 3.94803700  | -0.66916900 | -1.19870300 |
| C | 3.27090200  | 0.01921900  | -0.14563500 |
| H | 3.49168400  | 0.88545800  | 1.84566900  |
| H | 3.39258700  | -0.93221400 | -2.10596600 |
| C | 1.88178900  | 0.36412000  | -0.27115900 |
| C | 0.68400900  | 0.66392100  | -0.38460400 |
| C | -0.71374200 | 1.00154100  | -0.51681400 |
| H | -0.69948900 | 2.62554500  | 1.06127200  |
| C | -1.34991100 | 2.11424700  | 0.34608600  |
| C | -1.72748600 | 0.65726300  | 0.64314500  |
| H | -2.94648200 | -1.42612500 | 1.88627100  |
| C | -3.56202400 | -1.01653100 | 1.07489200  |
| C | -3.07437500 | 0.08641500  | 0.32021600  |
| H | -2.09999800 | 2.75512800  | -0.12851900 |
| C | -4.82345000 | -1.59013900 | 0.79482800  |
| H | -5.18030300 | -2.43851100 | 1.39092100  |
| C | -3.88918500 | 0.59703100  | -0.72944100 |
| H | -3.54591200 | 1.45016800  | -1.32916300 |

|   |             |             |             |
|---|-------------|-------------|-------------|
| C | -5.62415800 | -1.07304600 | -0.25172500 |
| C | -5.14945400 | 0.02345300  | -1.01230900 |
| H | -6.60241800 | -1.51625000 | -0.47108400 |
| H | -5.76301600 | 0.43174500  | -1.82438600 |
| H | -1.25006600 | 0.22122400  | 1.52779900  |
| H | -1.13171800 | 0.87950700  | -1.52403900 |

### **Transition State TS2**

Temperature: 298.15 Kelvin

Pressure: 1.0 Atm

Imaginary Frequency: -349.5155 cm<sup>-1</sup>

G\_corr: 1.554791 Hartree

H\_corr: 1.844453 Hartree

SCF: -6635.28914366 Hartree

S: 609.644 Cal/Mol-Kelvin

H: -6633.444691 Hartree

G: -6633.734353 Hartree

Cartesian Coordinates:

|    |             |             |             |
|----|-------------|-------------|-------------|
| Co | 0.56340200  | -0.02682400 | 0.11565000  |
| O  | -0.00147900 | 7.47241400  | -2.32879000 |
| O  | 6.55566600  | 2.77142400  | -3.56674600 |
| O  | 1.10013700  | -2.13703100 | -4.91024900 |
| O  | -3.29629200 | -0.70550400 | -3.71958300 |
| N  | 0.62122000  | 0.74542600  | -1.69513000 |
| N  | -0.07147900 | -1.73250700 | -0.66039300 |

|   |             |             |             |
|---|-------------|-------------|-------------|
| N | 0.72221500  | 5.41600000  | -1.43717100 |
| H | 0.43117100  | 4.63070500  | -0.84539900 |
| N | 4.58296500  | 2.56993200  | -2.29072900 |
| H | 4.04647500  | 1.90737400  | -1.72109900 |
| C | 1.96809800  | 2.82681700  | -1.27717900 |
| C | 1.21433700  | 1.96147900  | -2.09589100 |
| C | 0.93797500  | 2.23042200  | -3.50119900 |
| H | 1.29638800  | 3.10623100  | -4.04046200 |
| C | 0.15891100  | 1.19083200  | -3.96372500 |
| H | -0.23786800 | 1.03291500  | -4.96567300 |
| C | -0.01158900 | 0.25768000  | -2.85947400 |
| C | -0.59031400 | -1.01323400 | -3.00818600 |
| C | -0.53853000 | -1.96183300 | -1.97218700 |
| C | -0.86288900 | -3.36698700 | -2.16466500 |
| H | -1.22847100 | -3.78797900 | -3.10012900 |
| C | -0.57038300 | -4.01816000 | -0.98379500 |
| H | -0.64937600 | -5.08014300 | -0.75246800 |
| C | -0.11894300 | -3.00335200 | -0.03986200 |
| C | 2.65355000  | 4.00657700  | -1.92160300 |
| C | 2.00144800  | 5.27194800  | -2.04916600 |
| C | 2.63308600  | 6.33784500  | -2.74757700 |
| H | 2.10552400  | 7.28593200  | -2.86013800 |
| C | 3.91654100  | 6.13252000  | -3.29600800 |
| H | 4.39981600  | 6.95422100  | -3.83735300 |
| C | 4.59869200  | 4.90432800  | -3.16628900 |

|   |             |            |             |
|---|-------------|------------|-------------|
| H | 5.59070100  | 4.74548100 | -3.59231800 |
| C | 3.96379300  | 3.83882500 | -2.47318400 |
| C | -0.18895700 | 6.47589200 | -1.55755800 |
| C | -1.40727900 | 6.32901400 | -0.69331400 |
| H | -1.52247400 | 5.36357900 | -0.18497200 |
| C | -2.72410700 | 7.00919300 | -1.13691300 |
| H | -3.63859100 | 6.41804100 | -1.02524800 |
| H | -2.65393500 | 7.60326600 | -2.05412600 |
| C | -2.01130900 | 7.55798300 | 0.09397300  |
| C | -2.57671300 | 7.26441600 | 1.47193900  |
| C | -3.97131500 | 7.34017300 | 1.72558300  |
| H | -4.65707300 | 7.54839800 | 0.89530700  |
| C | -4.48092900 | 7.16206100 | 3.03431500  |
| H | -5.56103500 | 7.22647100 | 3.21285200  |
| C | -3.59940800 | 6.91124300 | 4.11287000  |
| H | -3.99285000 | 6.78669500 | 5.12910100  |
| C | -2.20524100 | 6.82965800 | 3.86997000  |
| H | -1.51205400 | 6.64383400 | 4.70004400  |
| C | -1.70115400 | 7.00344500 | 2.56097800  |
| H | -0.62085900 | 6.93803800 | 2.37887800  |
| C | -1.33009500 | 8.93239300 | 0.00202600  |
| H | -2.07405300 | 9.72446600 | 0.21110400  |
| H | -0.89886000 | 9.09475400 | -0.99919500 |
| H | -0.52102300 | 9.02457200 | 0.75086400  |
| C | 5.79548100  | 2.09264500 | -2.80363400 |

|   |             |             |             |
|---|-------------|-------------|-------------|
| C | 6.10363700  | 0.68487900  | -2.37436400 |
| H | 5.60729300  | 0.34806200  | -1.45545900 |
| C | 7.51873800  | 0.12308500  | -2.61451600 |
| H | 8.20778300  | 0.80134600  | -3.12926800 |
| H | 7.95042000  | -0.47641900 | -1.80681000 |
| C | 6.36189200  | -0.44663000 | -3.43619200 |
| C | 5.82457400  | -1.82229500 | -3.08646200 |
| C | 4.43317900  | -2.02935500 | -2.88685800 |
| H | 3.74455300  | -1.17640800 | -2.93842700 |
| C | 3.92388800  | -3.32212500 | -2.61714000 |
| H | 2.84628700  | -3.45984200 | -2.46840400 |
| C | 4.80281700  | -4.43152300 | -2.54978300 |
| H | 4.41190400  | -5.43302000 | -2.33510800 |
| C | 6.19102300  | -4.23688200 | -2.75394900 |
| H | 6.87606900  | -5.09197700 | -2.70447000 |
| C | 6.69598800  | -2.94194100 | -3.02143500 |
| H | 7.77197000  | -2.79208800 | -3.17660300 |
| C | 6.28265600  | -0.10502600 | -4.93128600 |
| H | 6.89250200  | -0.82299300 | -5.51196300 |
| H | 6.65647500  | 0.91487800  | -5.12557400 |
| H | 5.23989700  | -0.17184100 | -5.29597500 |
| C | -1.11289700 | -1.43226100 | -4.35617900 |
| C | -0.23557300 | -2.00477800 | -5.32330400 |
| C | -0.70289100 | -2.40584100 | -6.60325900 |
| H | -0.02407300 | -2.84115800 | -7.34136100 |

|   |             |             |             |
|---|-------------|-------------|-------------|
| C | -2.06824700 | -2.23477600 | -6.91602300 |
| H | -2.43649900 | -2.54286900 | -7.90147000 |
| C | -2.96782300 | -1.67554900 | -5.98471300 |
| H | -4.02151400 | -1.55448000 | -6.24887000 |
| C | -2.48329600 | -1.27626600 | -4.70924900 |
| C | 2.06155400  | -2.70211300 | -5.87205500 |
| C | -4.70460700 | -0.43783000 | -4.06364900 |
| O | -3.95610200 | -6.04712600 | 2.85696100  |
| O | 4.19450500  | -6.09988000 | 2.69019600  |
| O | 3.62529300  | 1.06114600  | 4.87215500  |
| O | -0.95484200 | 2.24597700  | 4.33938600  |
| N | 0.70794700  | -0.89429100 | 1.88153000  |
| N | 1.52733000  | 1.53670400  | 0.82733900  |
| N | -2.35329100 | -4.71417100 | 1.75739200  |
| H | -2.24808600 | -3.89234900 | 1.15394300  |
| N | 2.53614000  | -4.68140600 | 1.79408300  |
| H | 2.40750800  | -3.78865800 | 1.30725400  |
| C | 0.14142900  | -3.27352800 | 1.31800100  |
| C | 0.44041000  | -2.23471000 | 2.22436900  |
| C | 0.47143300  | -2.41048800 | 3.67060000  |
| H | 0.30613200  | -3.36036300 | 4.17708700  |
| C | 0.71556100  | -1.16980900 | 4.22209300  |
| H | 0.80610100  | -0.90002100 | 5.27329200  |
| C | 0.88905500  | -0.23891100 | 3.11792300  |
| C | 1.29670700  | 1.09510300  | 3.28079500  |

|   |             |             |             |
|---|-------------|-------------|-------------|
| C | 1.68888400  | 1.88275700  | 2.18443600  |
| C | 2.37254300  | 3.16059500  | 2.30824100  |
| H | 2.62582400  | 3.63051300  | 3.25743100  |
| C | 2.64595800  | 3.60149700  | 1.02832100  |
| H | 3.15917800  | 4.50962100  | 0.71320900  |
| C | 2.07206200  | 2.62331500  | 0.11244800  |
| C | 0.09617800  | -4.68437700 | 1.85142900  |
| C | -1.13656100 | -5.35326600 | 2.13896600  |
| C | -1.13036300 | -6.63071500 | 2.76510700  |
| H | -2.08149900 | -7.10294400 | 3.01390700  |
| C | 0.10183600  | -7.24383400 | 3.06998500  |
| H | 0.10054600  | -8.22706500 | 3.55473200  |
| C | 1.33509400  | -6.63296500 | 2.76255200  |
| H | 2.28993300  | -7.10905400 | 2.99094000  |
| C | 1.33079700  | -5.35139900 | 2.15000800  |
| C | -3.67129600 | -5.10482600 | 2.04880700  |
| C | -4.71717300 | -4.32387600 | 1.30871300  |
| H | -4.36852000 | -3.43894500 | 0.76181300  |
| C | -6.14025200 | -4.21931400 | 1.90706200  |
| H | -6.62297800 | -3.23891300 | 1.84531400  |
| H | -6.29309500 | -4.76818700 | 2.84237000  |
| C | -5.95133500 | -5.05164200 | 0.64383200  |
| C | -6.42862800 | -4.49909000 | -0.68694100 |
| C | -7.72922500 | -3.94617000 | -0.81947100 |
| H | -8.36150300 | -3.84588600 | 0.07131100  |

|   |             |             |             |
|---|-------------|-------------|-------------|
| C | -8.21513000 | -3.53416900 | -2.08341500 |
| H | -9.22634300 | -3.11812900 | -2.17060100 |
| C | -7.40476100 | -3.67040700 | -3.23666300 |
| H | -7.78642000 | -3.36407000 | -4.21840600 |
| C | -6.10210300 | -4.21538800 | -3.11369500 |
| H | -5.46677800 | -4.32800600 | -4.00097300 |
| C | -5.62189700 | -4.62700400 | -1.84917000 |
| H | -4.61324900 | -5.04992600 | -1.75862800 |
| C | -6.07976100 | -6.58032600 | 0.73483200  |
| H | -7.14431200 | -6.86502700 | 0.63287100  |
| H | -5.69614900 | -6.95398200 | 1.69817800  |
| H | -5.51999000 | -7.07353900 | -0.08229700 |
| C | 3.86362300  | -5.05024100 | 2.04947900  |
| C | 4.86626100  | -4.07681500 | 1.49644600  |
| H | 4.50429400  | -3.42295900 | 0.69307100  |
| C | 6.34289700  | -4.51094000 | 1.39208500  |
| H | 6.56052000  | -5.51241600 | 1.77861300  |
| H | 6.87256300  | -4.22457100 | 0.47796500  |
| C | 5.97388900  | -3.43713900 | 2.41446400  |
| C | 6.32969200  | -1.99272100 | 2.11288900  |
| C | 5.36388000  | -0.96217300 | 2.26716300  |
| H | 4.33940100  | -1.21683700 | 2.56643500  |
| C | 5.70542700  | 0.39151000  | 2.03646200  |
| H | 4.94383600  | 1.16962200  | 2.16396600  |
| C | 7.02583200  | 0.73494900  | 1.65299300  |



|   |             |             |             |
|---|-------------|-------------|-------------|
| H | 7.29175700  | 1.78236500  | 1.46743700  |
| C | 7.99877700  | -0.28398200 | 1.50505700  |
| H | 9.02340300  | -0.02385000 | 1.21246000  |
| C | 7.65170500  | -1.63696000 | 1.73485700  |
| H | 8.40566500  | -2.42573300 | 1.61826400  |
| C | 6.00997300  | -3.79320400 | 3.90761800  |
| H | 7.03425300  | -3.64902100 | 4.30100700  |
| H | 5.71107300  | -4.84238900 | 4.07286400  |
| H | 5.32901700  | -3.13883200 | 4.48436500  |
| C | 1.33563800  | 1.68340000  | 4.66151300  |
| C | 2.50682900  | 1.66644900  | 5.46748400  |
| C | 2.51020100  | 2.22868900  | 6.77239000  |
| H | 3.41086000  | 2.21233900  | 7.39209100  |
| C | 1.32465400  | 2.81433200  | 7.26717000  |
| H | 1.32160400  | 3.24983400  | 8.27312900  |
| C | 0.14271700  | 2.84947400  | 6.49549200  |
| H | -0.76336200 | 3.30652600  | 6.90259300  |
| C | 0.15752300  | 2.27916700  | 5.19525200  |
| C | 4.86752600  | 0.98327600  | 5.65889100  |
| C | -2.20605700 | 2.86522300  | 4.80462300  |
| H | -5.10840600 | 0.10041100  | -3.19536300 |
| H | -5.25804700 | -1.38362200 | -4.21855600 |
| H | -4.77692500 | 0.20661700  | -4.95992400 |
| H | 3.02066300  | -2.71443900 | -5.33528400 |
| H | 2.13775200  | -2.06765100 | -6.77614600 |

|   |             |             |             |
|---|-------------|-------------|-------------|
| H | 1.77912100  | -3.73392900 | -6.15756000 |
| H | -2.91660100 | 2.72031400  | 3.97837700  |
| H | -2.06988000 | 3.94774300  | 4.98653500  |
| H | -2.58085800 | 2.36642900  | 5.71941300  |
| H | 5.58517500  | 0.47950400  | 4.99571200  |
| H | 4.71698900  | 0.38846800  | 6.58038900  |
| H | 5.23897400  | 1.99364300  | 5.91809600  |
| C | -2.13179900 | 1.08514600  | -0.10147100 |
| C | -4.03994800 | 3.53871600  | -3.62661000 |
| C | -3.99270300 | 2.13728700  | -1.59432500 |
| C | -3.34910000 | 2.66433300  | -2.76155400 |
| C | -5.38362800 | 3.90563900  | -3.35652100 |
| C | -3.26829200 | 1.24946000  | -0.70923700 |
| C | -6.03027000 | 3.38762200  | -2.20593800 |
| C | -1.07958300 | 0.79428700  | 0.66964800  |
| C | -5.34804600 | 2.50997600  | -1.33505000 |
| H | -5.84562200 | 2.12208000  | -0.44057600 |
| H | -7.06593200 | 3.67225700  | -1.98437200 |
| H | -5.91580400 | 4.58769300  | -4.03016900 |
| H | -2.31436900 | 2.37461400  | -2.97317800 |
| H | -3.52897300 | 3.94088600  | -4.50958900 |
| H | -1.01399200 | 1.06323700  | 1.73455700  |
| C | -8.06279300 | 0.23109000  | 3.42546300  |
| C | -8.70444500 | 0.02541300  | 2.17803600  |
| C | -6.64593300 | 0.18376500  | 3.49384300  |

|   |             |             |             |
|---|-------------|-------------|-------------|
| C | -5.87875800 | -0.06595000 | 2.33756400  |
| C | -6.50897200 | -0.28326100 | 1.06961700  |
| C | -7.93909000 | -0.22680700 | 1.02010700  |
| H | -4.78519400 | -0.09181900 | 2.41066400  |
| H | -8.65433200 | 0.42482200  | 4.32779700  |
| H | -6.14303700 | 0.34088900  | 4.45589100  |
| H | -8.44082900 | -0.38884900 | 0.05681200  |
| H | -9.79861200 | 0.06152000  | 2.11243100  |
| C | -5.76236400 | -0.56328900 | -0.16077200 |
| C | -4.37950500 | -0.70064700 | -0.28222600 |
| H | -3.74920500 | -0.81095200 | 0.60686400  |
| H | -3.94817400 | -1.07384400 | -1.21763400 |
| H | -6.37350300 | -0.65244700 | -1.07102700 |

### **Intermediate E**

Temperature: 298.15 Kelvin

Pressure: 1.0 Atm

G\_corr: 1.559943 Hartree

H\_corr: 1.846928 Hartree

SCF: -6635.33554801 Hartree

S: 604.009 Cal/Mol-Kelvin

H: -6633.48862 Hartree

G: -6633.775605 Hartree

Cartesian Coordinates:

|    |             |             |            |
|----|-------------|-------------|------------|
| Co | -0.40814900 | -0.06844200 | 0.01878600 |
| O  | 0.06203100  | 7.46535500  | 2.38455500 |
| O  | -6.68120800 | 2.89800300  | 3.07615200 |
| O  | -1.67927700 | -2.53791500 | 4.72620200 |
| O  | 2.68004800  | -0.59063500 | 4.55217000 |
| N  | -0.68593500 | 0.68816800  | 1.81329600 |
| N  | 0.05612100  | -1.80576800 | 0.84410000 |
| N  | -0.62482300 | 5.40571000  | 1.46987100 |
| H  | -0.31649400 | 4.62700400  | 0.87816200 |
| N  | -4.60310000 | 2.64269800  | 1.99238000 |
| H  | -4.03830900 | 1.97148800  | 1.46155400 |
| C  | -1.88903700 | 2.82513500  | 1.24929200 |
| C  | -1.28826400 | 1.92126400  | 2.14933400 |
| C  | -1.21539500 | 2.15501100  | 3.58605900 |
| H  | -1.61403100 | 3.03671300  | 4.08592300 |
| C  | -0.56244100 | 1.07361200  | 4.13666300 |
| H  | -0.32515100 | 0.88547100  | 5.18258100 |
| C  | -0.25997200 | 0.15366600  | 3.04968000 |
| C  | 0.24231100  | -1.14231700 | 3.25782200 |
| C  | 0.32962500  | -2.06933200 | 2.20412300 |
| C  | 0.60715300  | -3.48367900 | 2.40766400 |
| H  | 0.84014800  | -3.92868700 | 3.37383100 |
| C  | 0.46674200  | -4.10750600 | 1.18563300 |
| H  | 0.56741500  | -5.16515200 | 0.94384200 |
| C  | 0.15774200  | -3.06807600 | 0.21104300 |

|   |             |            |             |
|---|-------------|------------|-------------|
| C | -2.60729400 | 4.02490900 | 1.81685700  |
| C | -1.94549600 | 5.27954900 | 1.99381800  |
| C | -2.60738000 | 6.35658000 | 2.64504900  |
| H | -2.07148200 | 7.29378400 | 2.80123500  |
| C | -3.93420500 | 6.17716800 | 3.08937700  |
| H | -4.44121700 | 7.00670400 | 3.59590300  |
| C | -4.63119200 | 4.96639000 | 2.89374800  |
| H | -5.65972300 | 4.82964000 | 3.23165500  |
| C | -3.96538700 | 3.88909800 | 2.24926500  |
| C | 0.27813300  | 6.46731600 | 1.62253900  |
| C | 1.52472400  | 6.32880800 | 0.79666500  |
| H | 1.68480500  | 5.35105600 | 0.32495900  |
| C | 2.80349100  | 7.07485800 | 1.24312800  |
| H | 3.74407000  | 6.51980600 | 1.16730000  |
| H | 2.68981200  | 7.69928400 | 2.13578000  |
| C | 2.09759500  | 7.55108600 | -0.02220200 |
| C | 2.70877100  | 7.23334700 | -1.37486200 |
| C | 4.09104300  | 7.44764000 | -1.61768900 |
| H | 4.73552900  | 7.77652600 | -0.79310200 |
| C | 4.63835400  | 7.25134200 | -2.90820500 |
| H | 5.70752800  | 7.42459100 | -3.08013000 |
| C | 3.80705200  | 6.84086900 | -3.97813100 |
| H | 4.22835000  | 6.70151400 | -4.98118700 |
| C | 2.42668100  | 6.61839700 | -3.74499200 |
| H | 1.77347500  | 6.30138600 | -4.56727100 |

|   |             |             |             |
|---|-------------|-------------|-------------|
| C | 1.88489300  | 6.81364300  | -2.45381000 |
| H | 0.81571200  | 6.63926300  | -2.27820600 |
| C | 1.36044400  | 8.89915400  | 0.00321400  |
| H | 2.07634400  | 9.71288900  | -0.21999600 |
| H | 0.90128200  | 9.08234500  | 0.98848400  |
| H | 0.56626800  | 8.92937400  | -0.76638700 |
| C | -5.87914500 | 2.20639300  | 2.36939000  |
| C | -6.20829600 | 0.82985100  | 1.86134800  |
| H | -5.63328700 | 0.49502400  | 0.98882700  |
| C | -7.67186300 | 0.34752300  | 1.92553800  |
| H | -8.37313900 | 1.05100500  | 2.38718700  |
| H | -8.04535500 | -0.20165800 | 1.05538800  |
| C | -6.64527100 | -0.31563700 | 2.84478100  |
| C | -6.15969600 | -1.71206100 | 2.50143600  |
| C | -4.77364000 | -1.99426900 | 2.37368200  |
| H | -4.04254300 | -1.18311000 | 2.48030000  |
| C | -4.32358200 | -3.31040400 | 2.11056000  |
| H | -3.24893600 | -3.50720900 | 2.01722900  |
| C | -5.25735000 | -4.36793000 | 1.97954100  |
| H | -4.91118700 | -5.38635200 | 1.76805400  |
| C | -6.64174600 | -4.09827200 | 2.11296400  |
| H | -7.36965300 | -4.91248200 | 2.01272700  |
| C | -7.08726000 | -2.78032400 | 2.37227500  |
| H | -8.16024900 | -2.57162900 | 2.47038600  |
| C | -6.70959700 | -0.02871000 | 4.35204400  |

|   |             |             |             |
|---|-------------|-------------|-------------|
| H | -7.41947800 | -0.72599300 | 4.83625400  |
| H | -7.04275200 | 1.00546200  | 4.54479700  |
| H | -5.71815100 | -0.17232700 | 4.82208400  |
| C | 0.51877100  | -1.59804300 | 4.66657200  |
| C | -0.47211700 | -2.30932800 | 5.40623100  |
| C | -0.23825100 | -2.73637600 | 6.74085400  |
| H | -1.00230000 | -3.28247500 | 7.30015600  |
| C | 1.00017100  | -2.44006200 | 7.34751000  |
| H | 1.18693800  | -2.76655100 | 8.37712200  |
| C | 2.00014100  | -1.72757600 | 6.65415300  |
| H | 2.95086800  | -1.50503300 | 7.14558500  |
| C | 1.75124000  | -1.30941900 | 5.31849800  |
| C | -2.75468800 | -3.22659800 | 5.46041200  |
| C | 3.91170200  | -0.14642700 | 5.22439000  |
| O | 4.11966300  | -6.38722500 | -2.21818000 |
| O | -3.98350100 | -5.94900000 | -2.93111500 |
| O | -2.71320900 | 1.25207600  | -5.12591700 |
| O | 1.78377300  | 2.15681800  | -3.86516100 |
| N | -0.34198300 | -0.90839000 | -1.76713300 |
| N | -1.20367200 | 1.54384400  | -0.79234300 |
| N | 2.50944600  | -4.83679400 | -1.46799900 |
| H | 2.39838100  | -3.93194500 | -0.99932100 |
| N | -2.35548200 | -4.59705900 | -1.88770600 |
| H | -2.22808700 | -3.69485900 | -1.41823200 |
| C | 0.05147500  | -3.31459300 | -1.17264800 |

|   |             |             |             |
|---|-------------|-------------|-------------|
| C | -0.09768100 | -2.25667900 | -2.09442900 |
| C | 0.03958400  | -2.41882200 | -3.53621500 |
| H | 0.21180800  | -3.37303300 | -4.03270300 |
| C | -0.06926200 | -1.16109200 | -4.09461600 |
| H | -0.02026000 | -0.87713800 | -5.14501900 |
| C | -0.33287300 | -0.23302600 | -3.00590800 |
| C | -0.65127500 | 1.12114200  | -3.19779200 |
| C | -1.16097100 | 1.91156200  | -2.15273800 |
| C | -1.77536100 | 3.21484100  | -2.35133800 |
| H | -1.87820500 | 3.70273500  | -3.31948100 |
| C | -2.21394300 | 3.64963200  | -1.11566800 |
| H | -2.74120000 | 4.56914800  | -0.86249900 |
| C | -1.80750900 | 2.64104200  | -0.14466200 |
| C | 0.07678600  | -4.72702600 | -1.70656400 |
| C | 1.29487100  | -5.45784700 | -1.88286000 |
| C | 1.27747100  | -6.76059100 | -2.45412700 |
| H | 2.22157800  | -7.28762100 | -2.59701300 |
| C | 0.04505700  | -7.32686000 | -2.83854100 |
| H | 0.03620600  | -8.32949200 | -3.28169700 |
| C | -1.17532400 | -6.64174300 | -2.66942400 |
| H | -2.12940700 | -7.07641100 | -2.97145700 |
| C | -1.15887600 | -5.33979300 | -2.10064900 |
| C | 3.82472300  | -5.30395800 | -1.61607900 |
| C | 4.86237000  | -4.41151400 | -1.00085200 |
| H | 4.51384700  | -3.42629600 | -0.66872900 |



|   |             |             |             |
|---|-------------|-------------|-------------|
| C | 6.30010900  | -4.44686500 | -1.56987500 |
| H | 6.79282000  | -3.47808900 | -1.70071600 |
| H | 6.46436200  | -5.17710300 | -2.36917600 |
| C | 6.06562200  | -4.99837200 | -0.16735300 |
| C | 6.51849800  | -4.18073100 | 1.02847000  |
| C | 7.81284700  | -3.59855000 | 1.06403500  |
| H | 8.46404800  | -3.68821200 | 0.18578400  |
| C | 8.26905500  | -2.91626900 | 2.21727700  |
| H | 9.27430900  | -2.47757800 | 2.23055200  |
| C | 7.43485400  | -2.80872100 | 3.35641600  |
| H | 7.79061500  | -2.28788600 | 4.25367400  |
| C | 6.14034400  | -3.38505200 | 3.33017400  |
| H | 5.48604500  | -3.31017400 | 4.20722800  |
| C | 5.68899800  | -4.06556500 | 2.17607800  |
| H | 4.68531400  | -4.50915500 | 2.16162400  |
| C | 6.16704700  | -6.51398000 | 0.06311500  |
| H | 7.22296500  | -6.78833500 | 0.24861100  |
| H | 5.79673400  | -7.07282200 | -0.81196400 |
| H | 5.57930000  | -6.81894800 | 0.94951400  |
| C | -3.66563300 | -4.89910100 | -2.28410200 |
| C | -4.66608300 | -3.85493500 | -1.87617900 |
| H | -4.36366300 | -3.20109700 | -1.04884600 |
| C | -6.16725400 | -4.20297900 | -1.94086600 |
| H | -6.39476500 | -5.20078500 | -2.33122900 |
| H | -6.78302900 | -3.86520200 | -1.10145200 |

|   |             |             |             |
|---|-------------|-------------|-------------|
| C | -5.61864700 | -3.17870900 | -2.93272400 |
| C | -5.92307300 | -1.70959400 | -2.70193200 |
| C | -4.89040900 | -0.73633700 | -2.77403800 |
| H | -3.85590500 | -1.05259500 | -2.95798700 |
| C | -5.17764100 | 0.63888100  | -2.60562900 |
| H | -4.36410700 | 1.37121700  | -2.66426900 |
| C | -6.50940600 | 1.06196700  | -2.36909200 |
| H | -6.73394600 | 2.12643000  | -2.23183300 |
| C | -7.54796500 | 0.10087100  | -2.30486500 |
| H | -8.58120800 | 0.42262300  | -2.12584600 |
| C | -7.25509400 | -1.27404100 | -2.47130300 |
| H | -8.05995300 | -2.01810100 | -2.41914200 |
| C | -5.49841200 | -3.57109600 | -4.41219200 |
| H | -6.45961700 | -3.38312800 | -4.92742000 |
| H | -5.24141700 | -4.63875100 | -4.51989800 |
| H | -4.71915000 | -2.96909600 | -4.91699100 |
| C | -0.45258000 | 1.73431800  | -4.55323800 |
| C | -1.48444200 | 1.80196100  | -5.52785900 |
| C | -1.25520300 | 2.38743000  | -6.80214600 |
| H | -2.04866100 | 2.43564200  | -7.55296100 |
| C | 0.02372400  | 2.91154700  | -7.09255700 |
| H | 0.20602000  | 3.36483800  | -8.07395800 |
| C | 1.07244000  | 2.86379100  | -6.14808400 |
| H | 2.05449400  | 3.27557000  | -6.39648400 |
| C | 0.82577600  | 2.27101000  | -4.88129600 |

|   |             |             |             |
|---|-------------|-------------|-------------|
| C | -3.82221100 | 1.25913100  | -6.09390300 |
| C | 3.14418300  | 2.66129800  | -4.12403200 |
| H | 4.43529400  | 0.46445500  | 4.47686200  |
| H | 4.53881500  | -1.01083100 | 5.51941200  |
| H | 3.67796000  | 0.46984300  | 6.11371000  |
| H | -3.59425500 | -3.27068300 | 4.75265700  |
| H | -3.04822500 | -2.65486600 | 6.36191500  |
| H | -2.44775200 | -4.25128000 | 5.74673000  |
| H | 3.71432200  | 2.40273500  | -3.22089300 |
| H | 3.13587200  | 3.75834900  | -4.26595000 |
| H | 3.59354500  | 2.15660300  | -5.00004300 |
| H | -4.65946600 | 0.78636000  | -5.56064800 |
| H | -3.56525400 | 0.67212800  | -6.99674000 |
| H | -4.09436800 | 2.29326700  | -6.38137400 |
| C | 2.41020100  | 0.68840100  | 0.46333200  |
| C | 3.47236800  | 3.80579900  | 3.31386600  |
| C | 4.01814700  | 1.77000000  | 2.02317000  |
| C | 3.07863900  | 2.75038200  | 2.46699900  |
| C | 4.81943200  | 3.91456200  | 3.74663400  |
| C | 3.59006000  | 0.66442200  | 1.12612600  |
| C | 5.76304600  | 2.94940600  | 3.32049800  |
| C | 1.35891400  | 0.68012100  | -0.31441200 |
| C | 5.36730500  | 1.88893400  | 2.47275500  |
| H | 6.11748100  | 1.15905200  | 2.15139200  |
| H | 6.80816600  | 3.02328300  | 3.64499200  |

|   |            |             |             |
|---|------------|-------------|-------------|
| H | 5.12443700 | 4.73619700  | 4.40518200  |
| H | 2.03297100 | 2.65779200  | 2.15164900  |
| H | 2.73016000 | 4.54110200  | 3.64559300  |
| H | 1.34102900 | 1.12387800  | -1.32205800 |
| C | 5.38366500 | -0.76488300 | -4.40112300 |
| C | 6.60021000 | -0.36219600 | -3.78263800 |
| C | 4.23147100 | -0.98007800 | -3.59817700 |
| C | 4.28511700 | -0.80991800 | -2.20271900 |
| C | 5.51147100 | -0.41802500 | -1.54870200 |
| C | 6.66501800 | -0.18887500 | -2.38957600 |
| H | 3.37678600 | -0.95367500 | -1.60737600 |
| H | 5.33726100 | -0.91135000 | -5.48654300 |
| H | 3.28610600 | -1.27905600 | -4.06598300 |
| H | 7.60756600 | 0.11998600  | -1.91812700 |
| H | 7.49339800 | -0.19027400 | -4.39576800 |
| C | 5.63219700 | -0.26970600 | -0.12892100 |
| C | 4.53798700 | -0.54319200 | 0.88382100  |
| H | 3.91008400 | -1.39032200 | 0.55300900  |
| H | 4.99451300 | -0.84443700 | 1.84545900  |
| H | 6.60864800 | 0.05857300  | 0.25483600  |

## 10. References

- (1) Wang, Y.; Wen, X.; Cui, X.; Wojtas, L.; Zhang, X. P. *J. Am. Chem. Soc.* **2017**, *139*, 1049–1052.
- (2) Ma, S.; He, Q., *Tetrahedron* **2006**, *62*, 2769–2778.
- (3) Hiroki, H.; Ogata, K.; Fukuzawa, S.-i., *Synlett* **2013**, *24*, 843–846.
- (4) Li, J.-H.; Huang, Q.; Wang, S.-Y.; Ji, S.-J., *Org. Lett.* **2018**, *20*, 4704–4708.
- (5) Bruker (2012). *APEX2*. Bruker AXS Inc., Madison, Wisconsin, USA.
- (6) Bruker (2012). *SAINT*. Data Reduction Software.
- (7) Sheldrick, G. M. (1996). *SADABS. Program for Empirical Absorption Correction*. University of Gottingen, Germany.
- (8) Farrugia, L. J. *J. Appl. Cryst.* **1999**, *32*, 837–838.
- (9) Sheldrick, G. M. (2012 Beta) *SHELXL-97*. Program for the Refinement of Crystal.
- (10) Sheldrick, G. M. *Acta Cryst.* **1990**, *A46*, 467–473.
- (11) Frisch, M. J. *et al.*, *Gaussian 16, Revision A.03*, Gaussian, Inc., Wallingford CT, **2016**
- (12) Schultz, N. E.; Zhao, Yan; Truhlar, D. G. *J. Phys. Chem. A* **2005**, *109*, 11127.
- (13) Suarez, A. I. O.; Jiang, H.-L.; Zhang, X. P.; de Bruin, B. *Dalton Trans.* **2011**, *40*, 5697–5705.
- (14) Lang, K.; Torker, S.; Wojtas, L.; Zhang, X. P. *J. Am. Chem. Soc.* **2019**, *141*, 12388–12396.
- (15) Eichkorn, K.; Weigend, F.; Treutler, O.; Ahlrichs, R. *Theor. Chem. Acc.* **1997**, *97*, 119–124.
- (16) Furche, F.; Perdew, J. P. *J. Chem. Phys.* **2006**, *124*, 044103.
- (17) Grimme, S.; Antony, J.; Ehrlich, S.; Krieg, H. *J. Chem. Phys.* **2010**, *132*, 154104.
- (18) Marenich, A. V.; Cramer, C. J.; Truhlar, D. G. *J. Phys. Chem. B* **2009**, *113*, 6378–6396.
- (19) Lefebvre, C.; Rubez, G.; Khartabil, H.; Boisson, J.-C.; Contreras-García, J.; Hénon, E. *Phys. Chem. Chem. Phys.* **2017**, *19*, 17928–17936.
- (20) Lu, T.; Chen, F. *J. Comput. Chem.* **2012**, *33*, 580–592.
- (21) Humphrey, W.; Dalke, A.; Schulten, K. *J. Mol. Graph.* **1996**, *14*, 33–38.
- (22) Legault, C. Y. *CYLview*, 1.0b (Université de Sherbrooke, Québec, Montreal, Canada, **2009**).
- (23) Stone, J.E. *An Efficient Library for Parallel Ray Tracing and Animation*. Master's Thesis, University of Missouri, **1998**.

## 11. NMR/HPLC Spectral Data

# $^1\text{H}$ NMR of **1a**, 600 MHz, $\text{CDCl}_3$

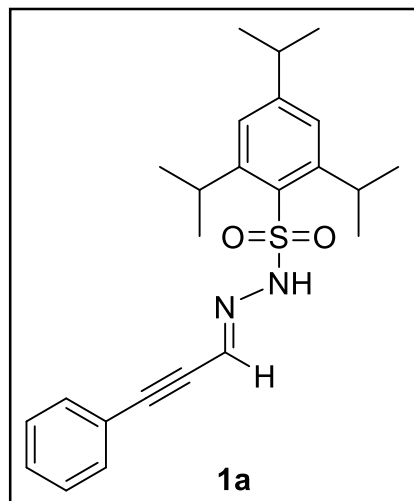

8.783

7.519  
7.506  
7.466  
7.454  
7.442  
7.414  
7.401  
7.388  
7.189  
6.815

4.245  
4.234  
4.222  
4.211  
4.200  
4.189  
4.177  
2.944  
2.933  
2.921  
2.910  
2.898  
2.887  
2.875

1.290  
1.278  
1.265  
1.254

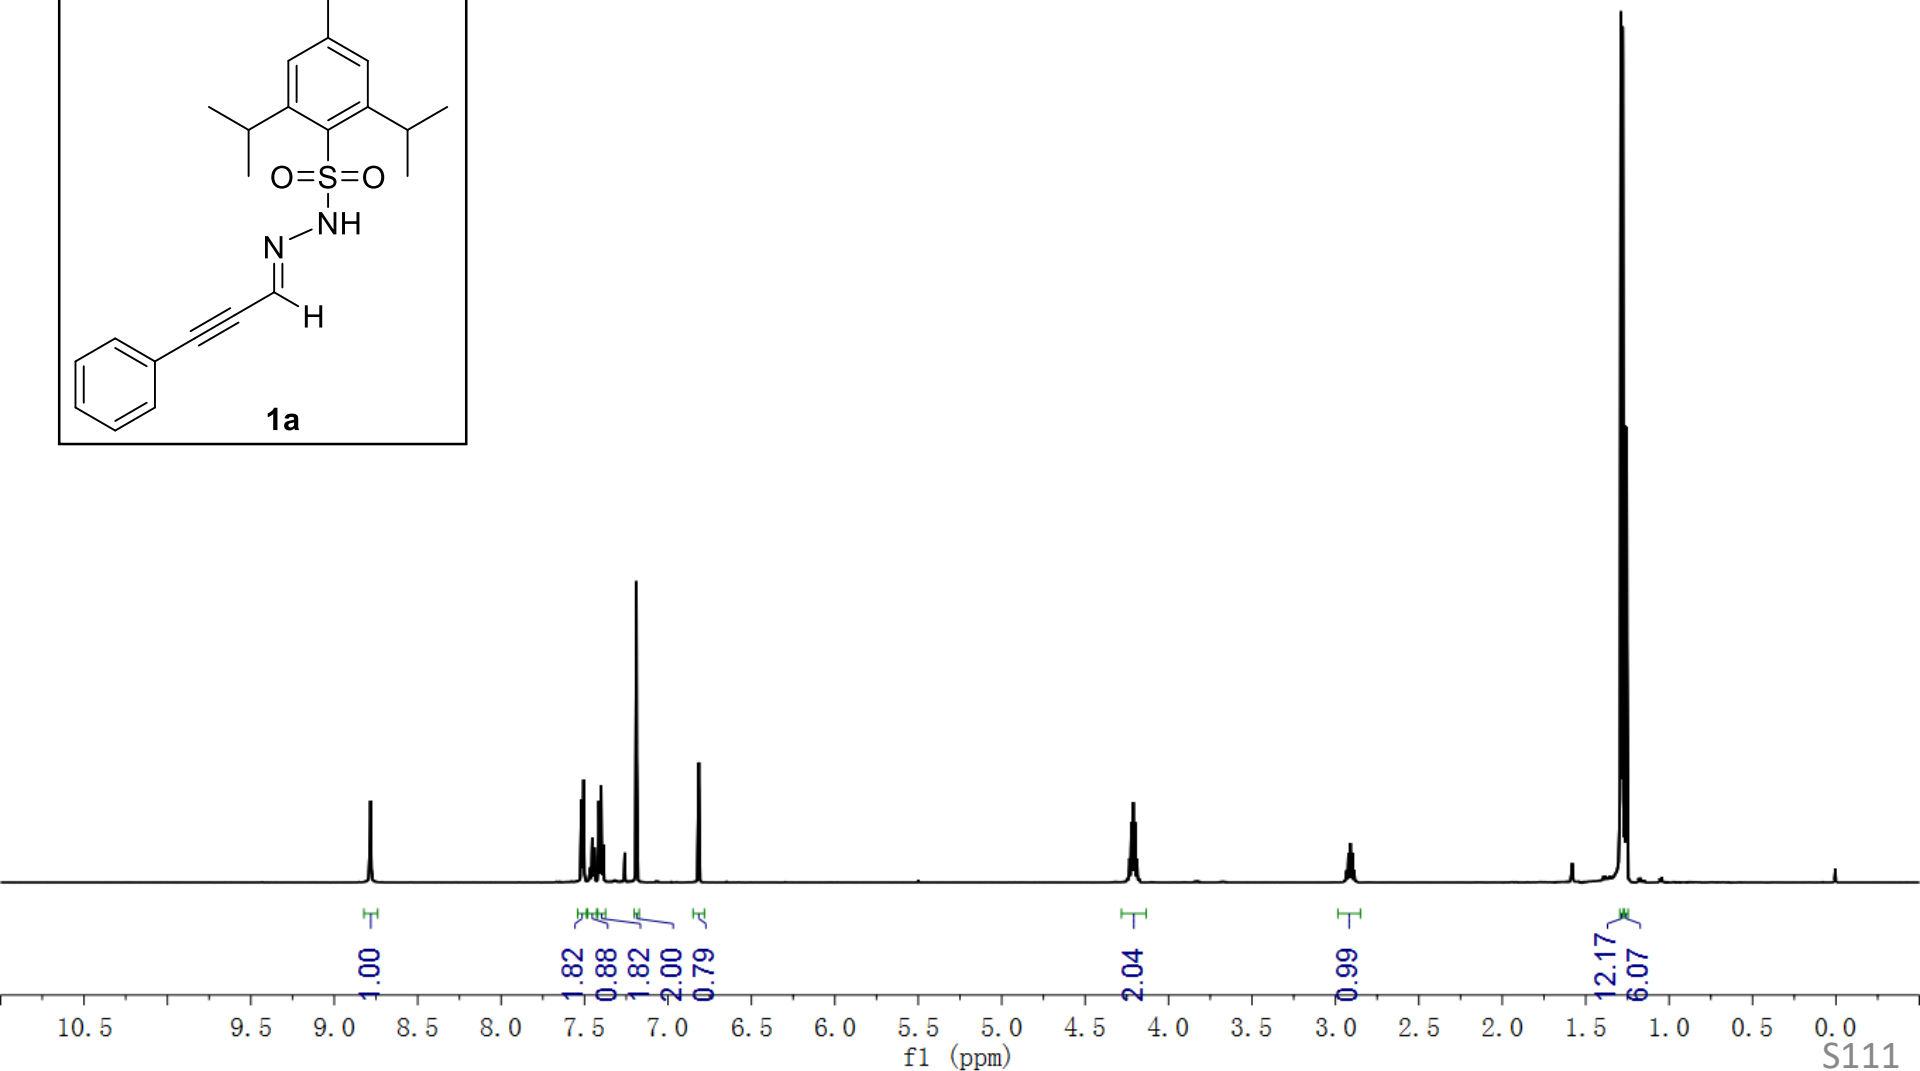

$^{13}\text{C}$  NMR of **1a**, 151 MHz,  $\text{CDCl}_3$

153.708  
151.269

132.188  
131.321  
130.482  
128.860  
124.386  
124.047  
120.412

103.243

77.747  
77.372  
77.160  
76.949

34.332  
30.150  
24.920  
23.656

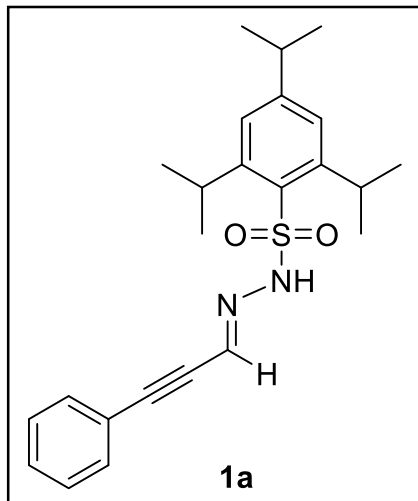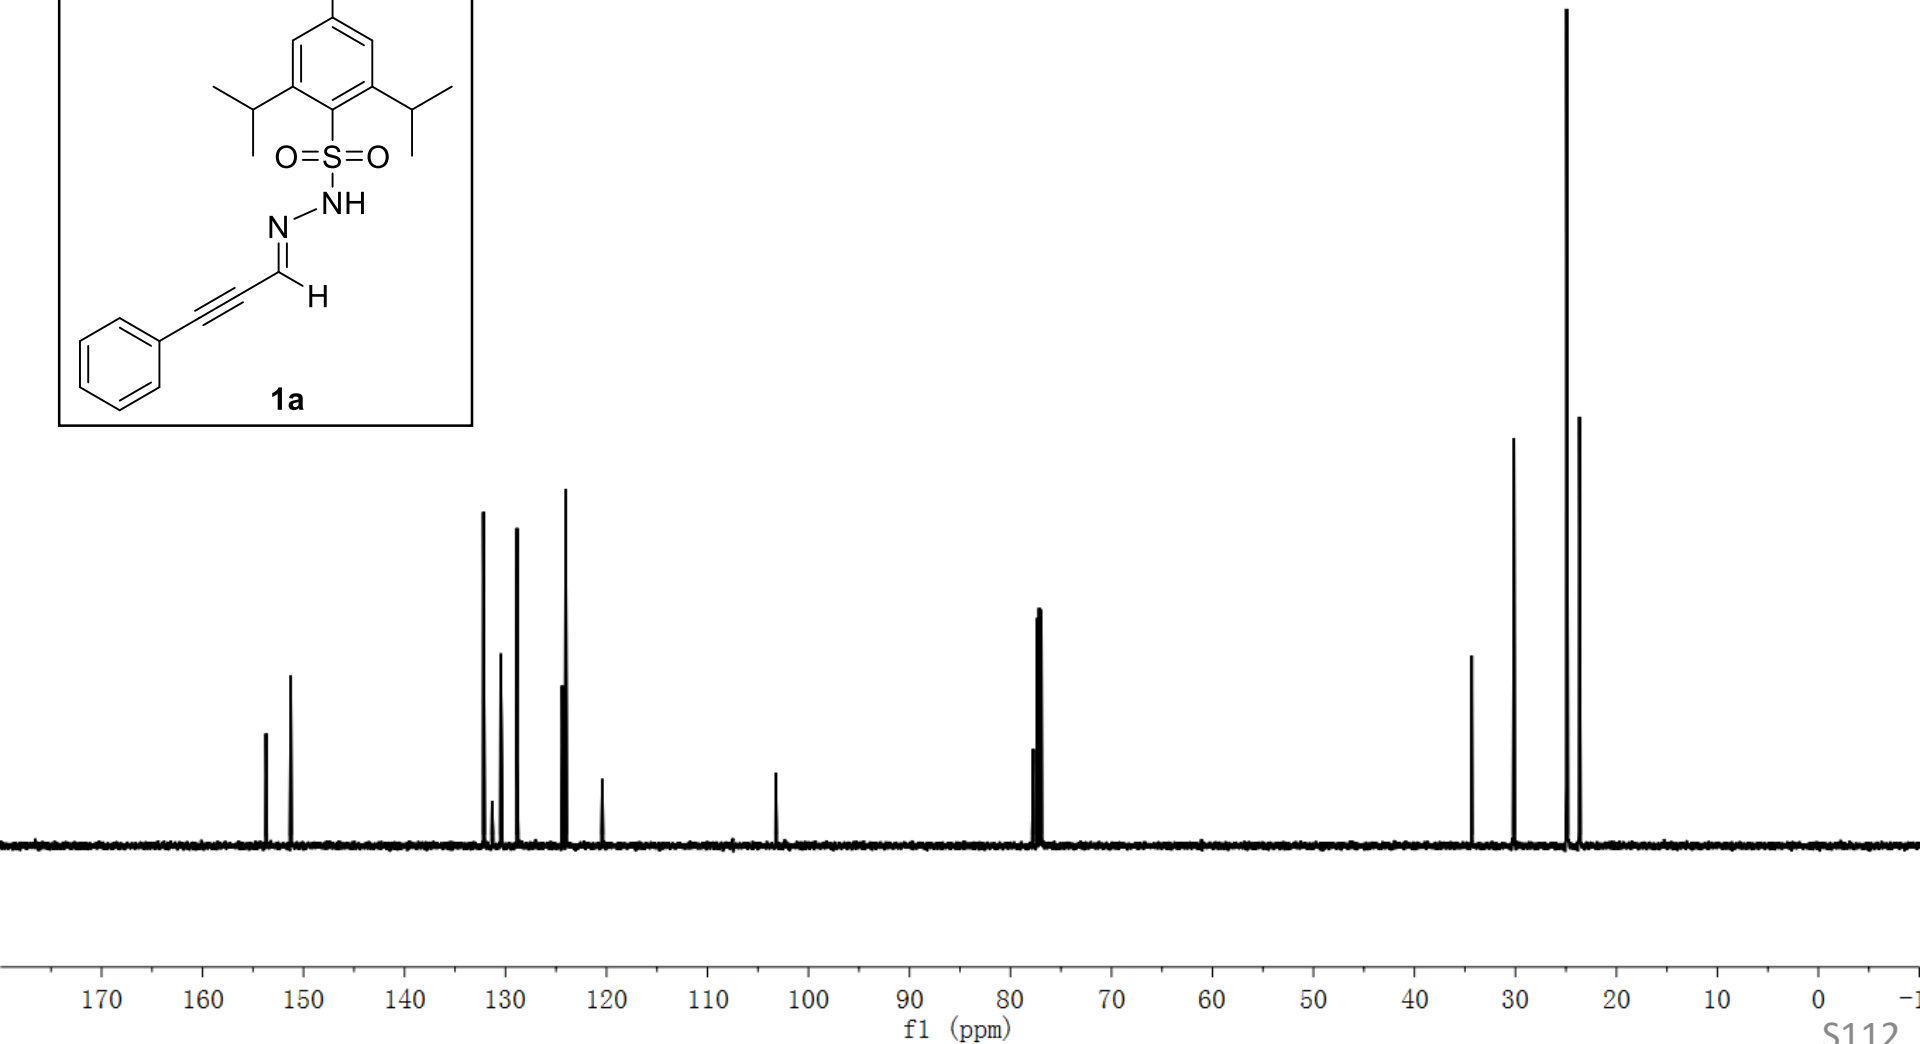



$^1\text{H}$  NMR of **1b**, 600 MHz,  $\text{CDCl}_3$

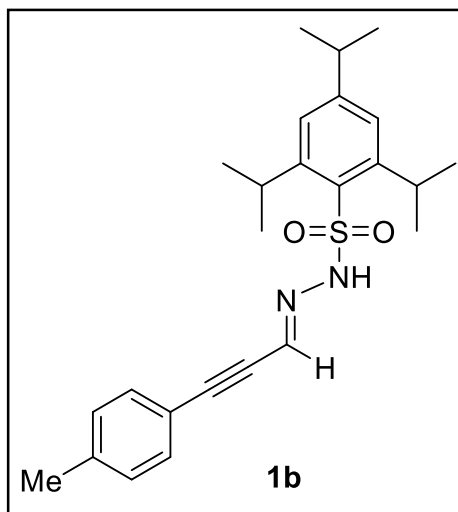

8.736

7.408

7.394

7.218

7.204

7.182

6.804

4.225

4.214

4.202

4.191

4.180

2.928

2.917

2.905

2.894

2.882

2.403

1.283

1.272

1.262

1.250

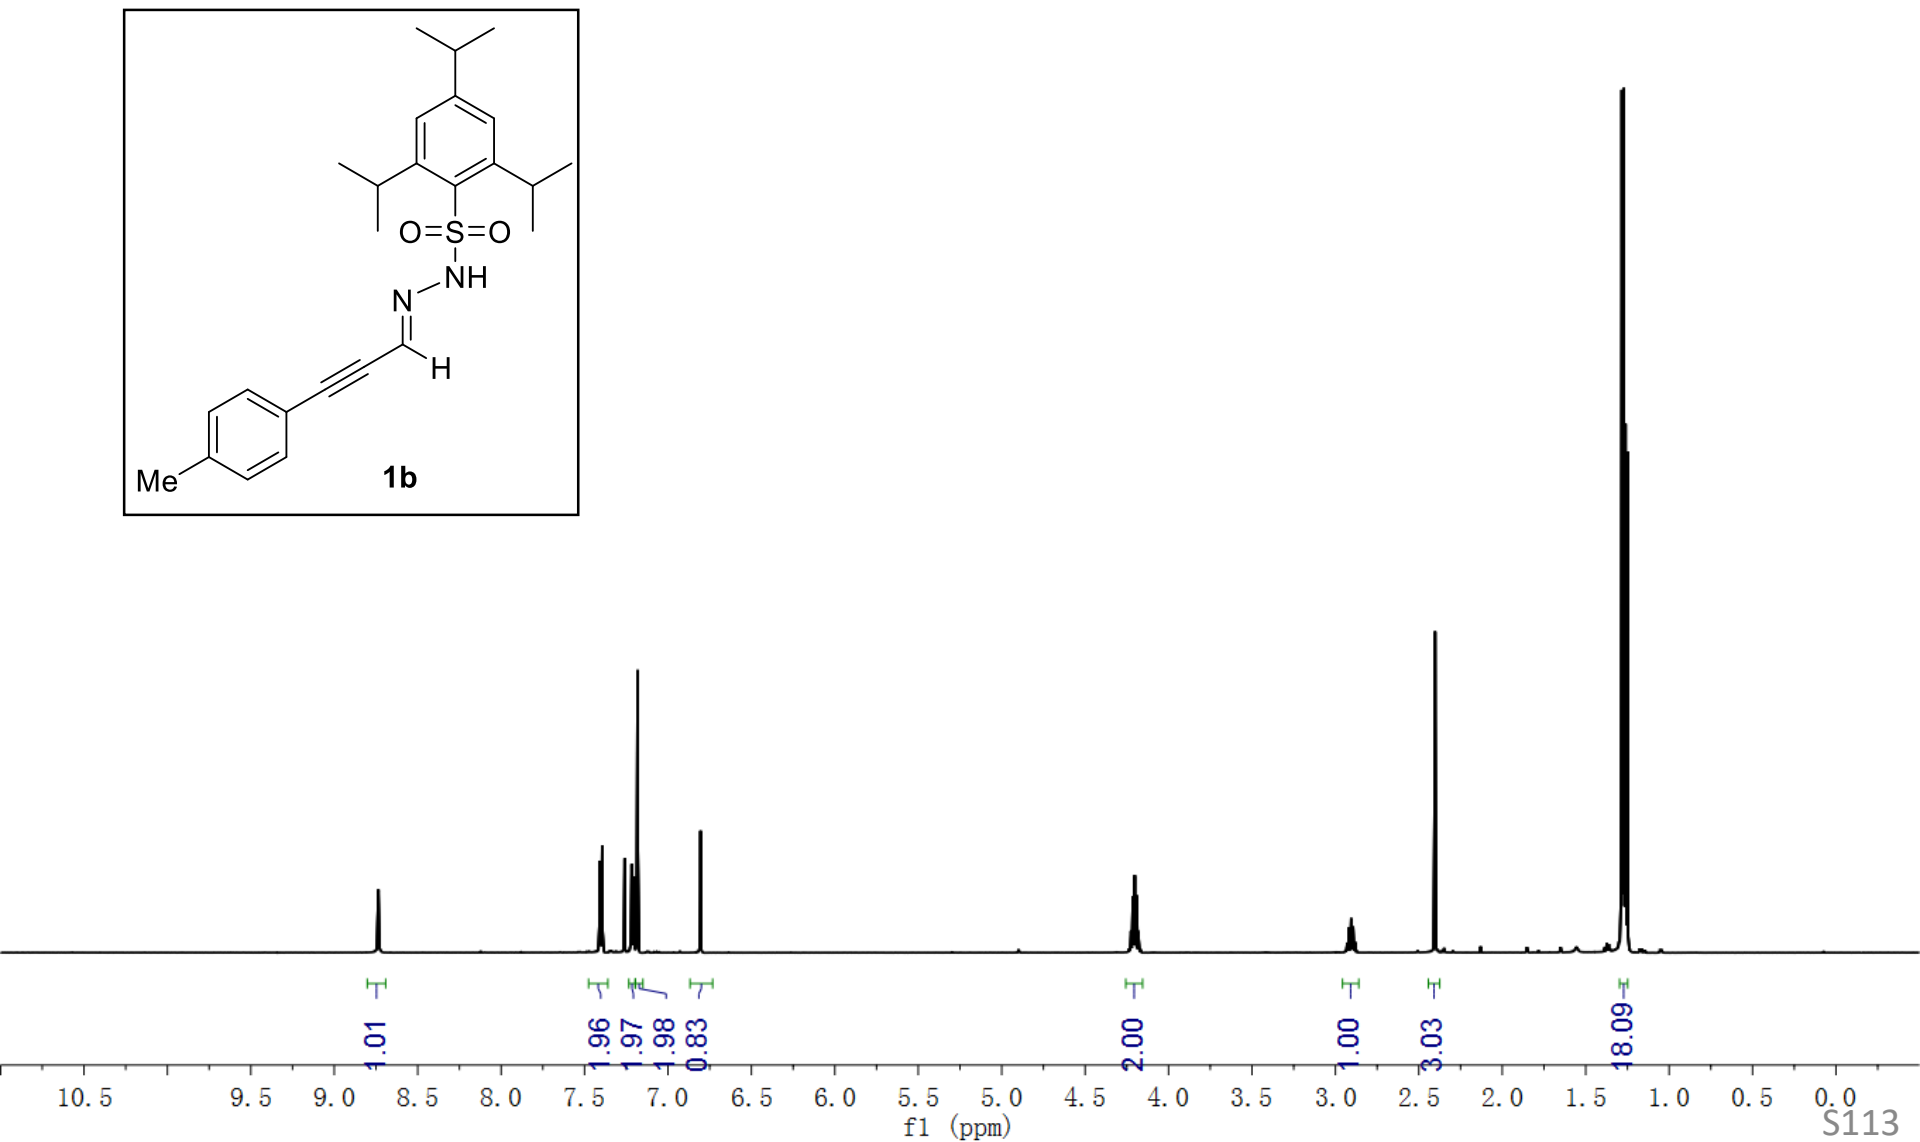

# $^{13}\text{C}$ NMR of **1b**, 151 MHz, $\text{CDCl}_3$

153.670  
151.259

141.112

132.134

131.367

129.656

124.706

124.044

117.326

103.745

77.401

77.372

77.160

76.949

34.340

30.163

24.933

23.667

21.842

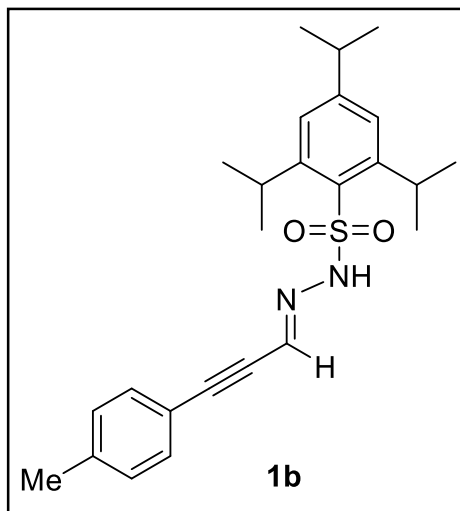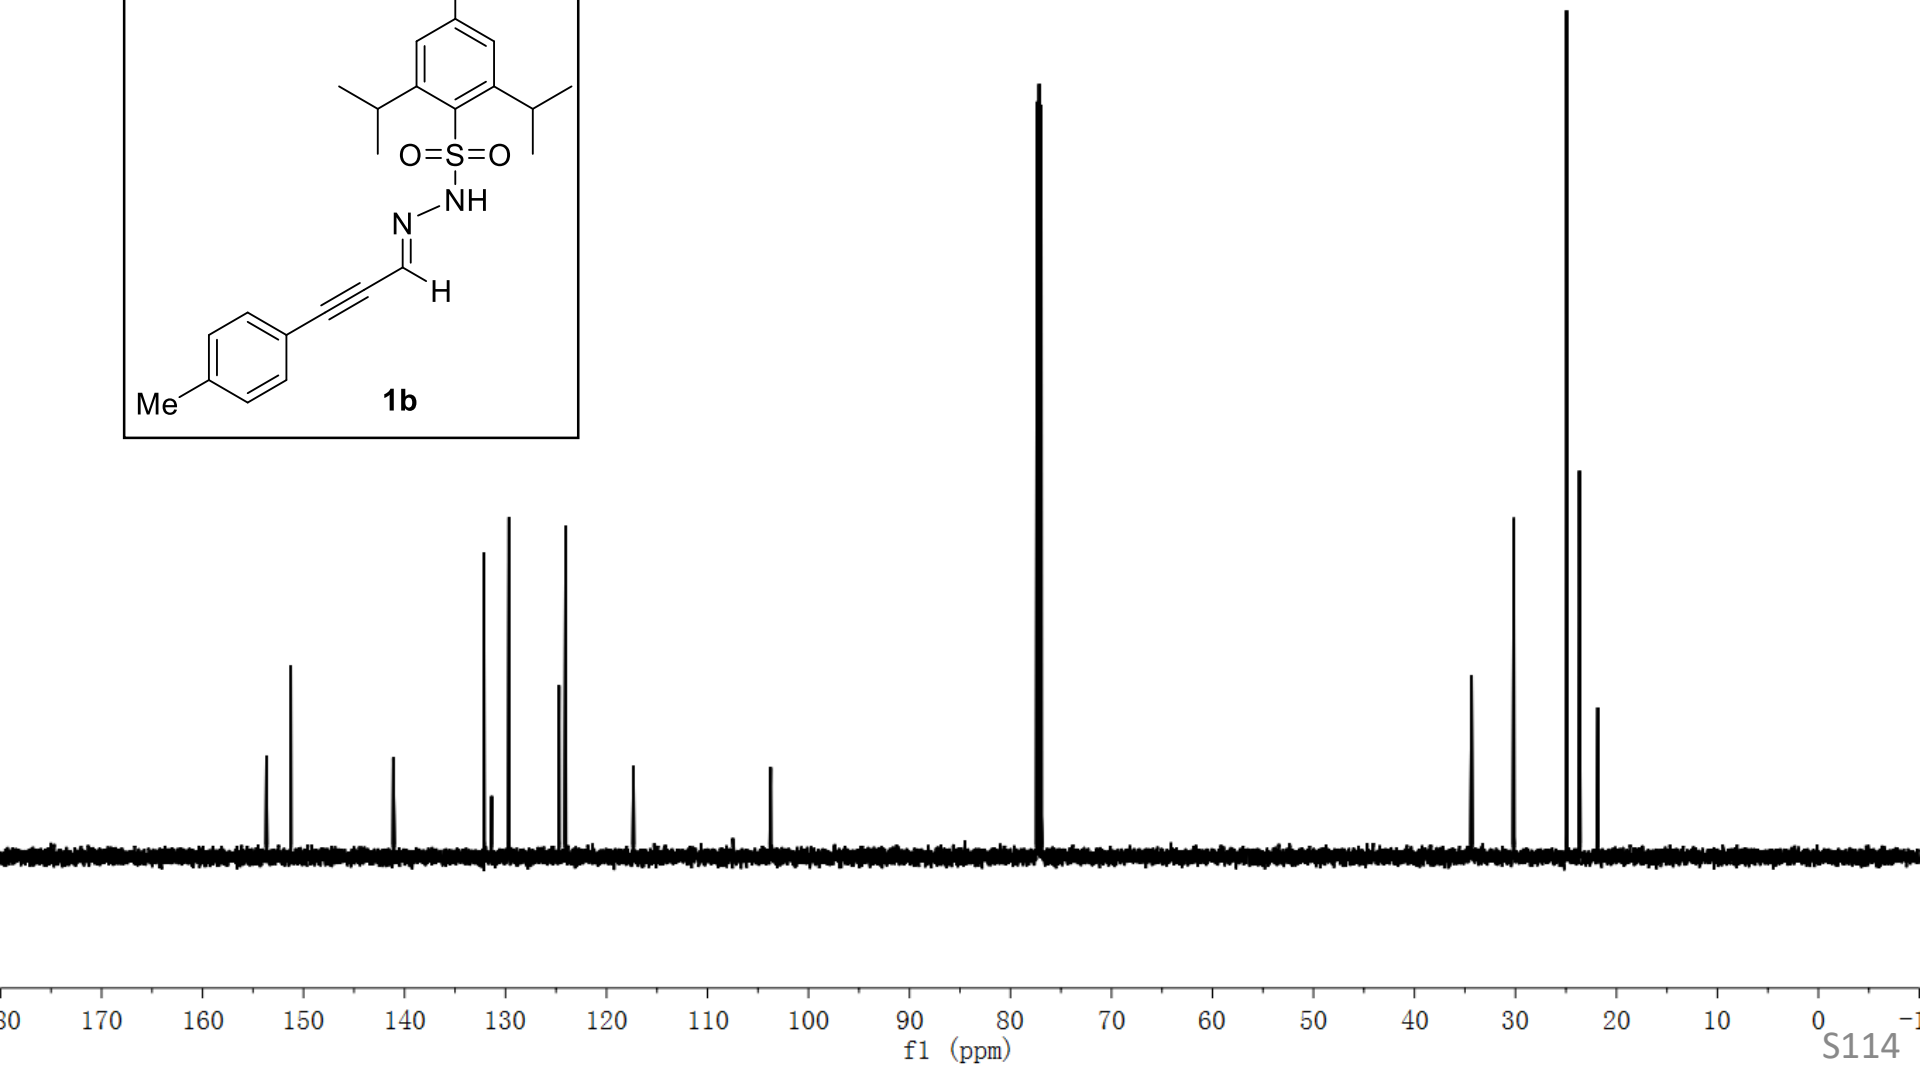

<sup>1</sup>H NMR of **1c**, 600 MHz, CDCl<sub>3</sub>

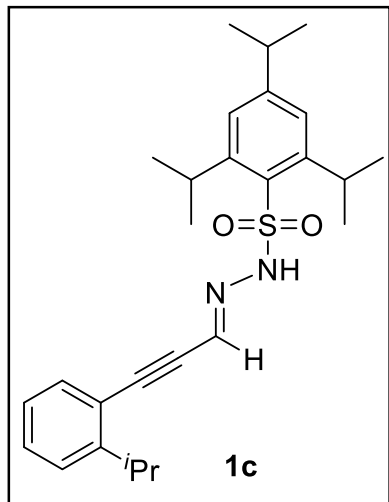

—8.729

7.481  
7.468  
7.436  
7.423  
7.411  
7.358  
7.345  
7.233  
7.221  
7.208  
7.189  
6.849

4.242  
4.231  
4.220  
4.209  
4.197  
4.186  
4.175

3.388  
3.377  
3.365

2.944  
2.933  
2.921  
2.910  
2.898

1.304  
1.284  
1.273  
1.264  
1.253

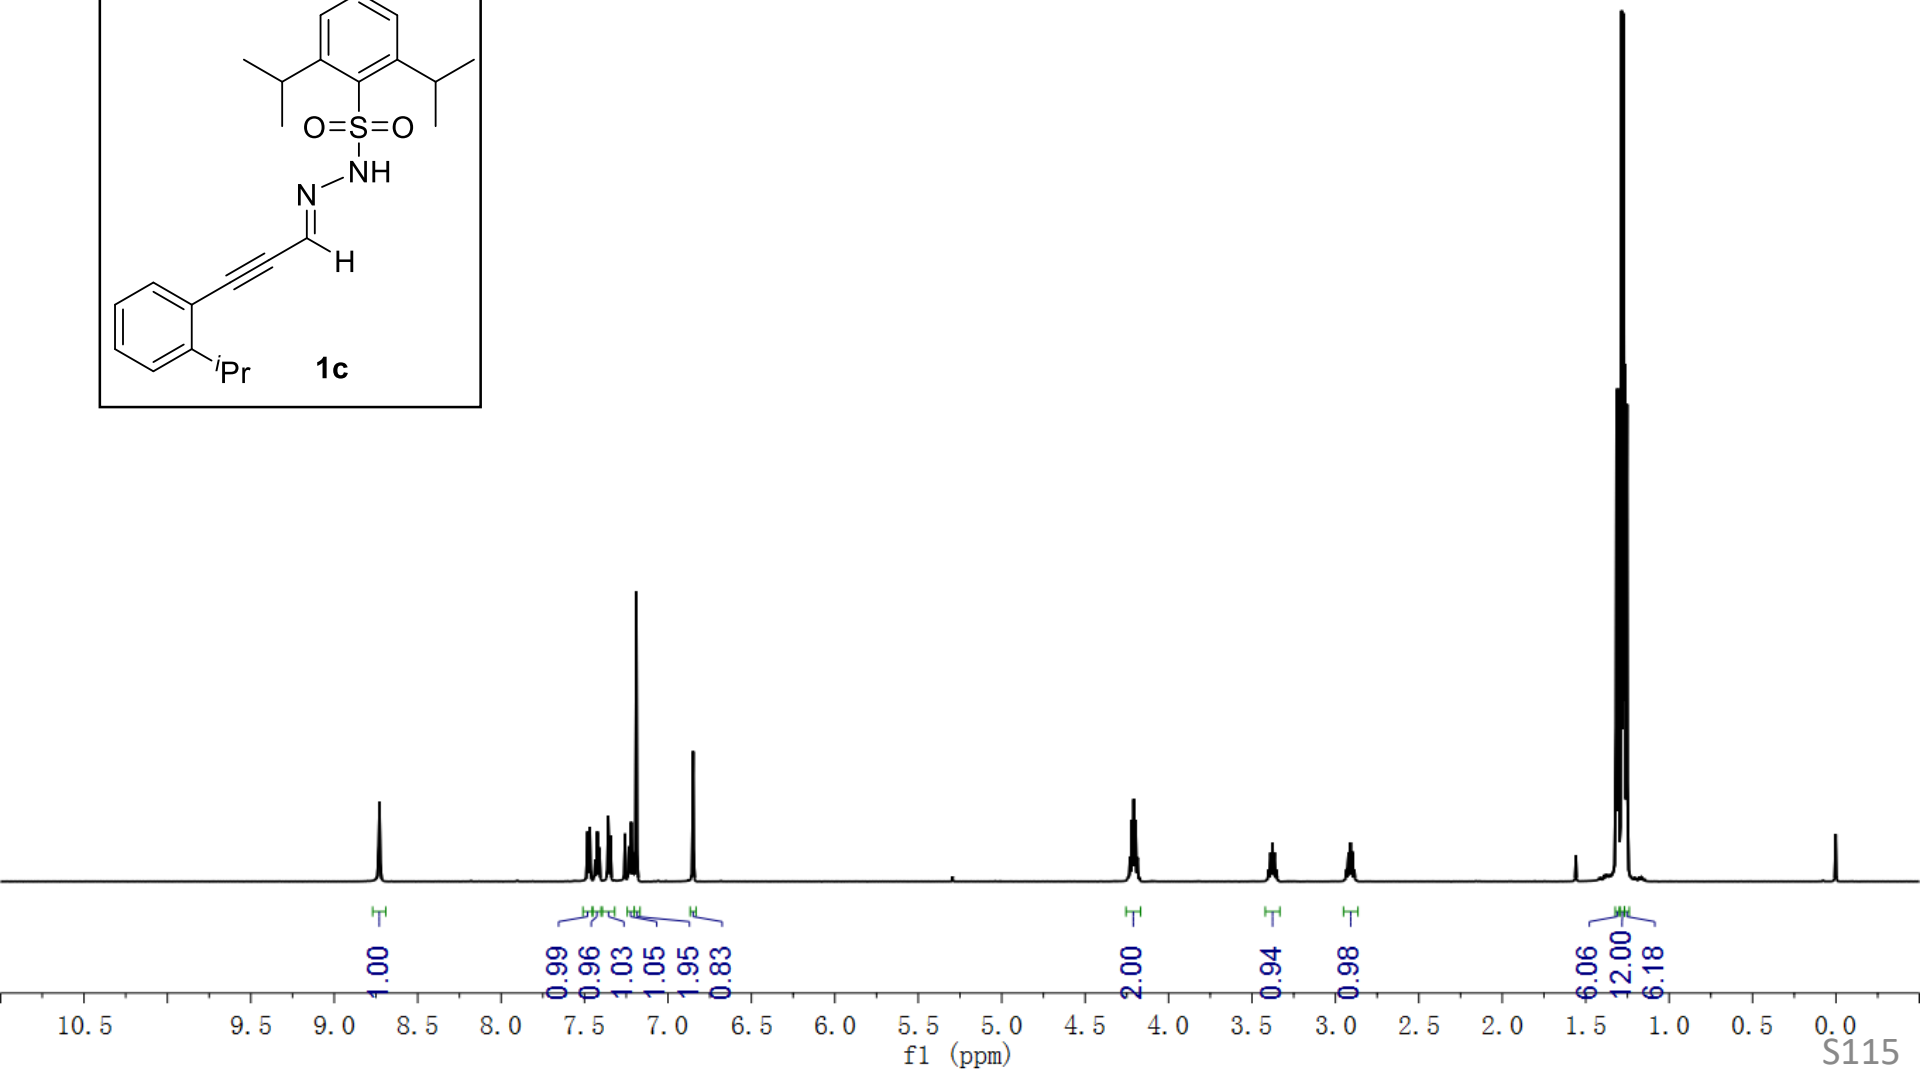

# $^{13}\text{C}$ NMR of **1c**, 151 MHz, $\text{CDCl}_3$

153.706  
151.323  
151.309

133.137  
131.348  
130.968

126.131  
125.460  
124.553  
124.049  
119.271

-102.412

81.492  
77.372  
77.160  
76.948

34.344  
32.219  
30.180  
24.930  
23.667  
23.249

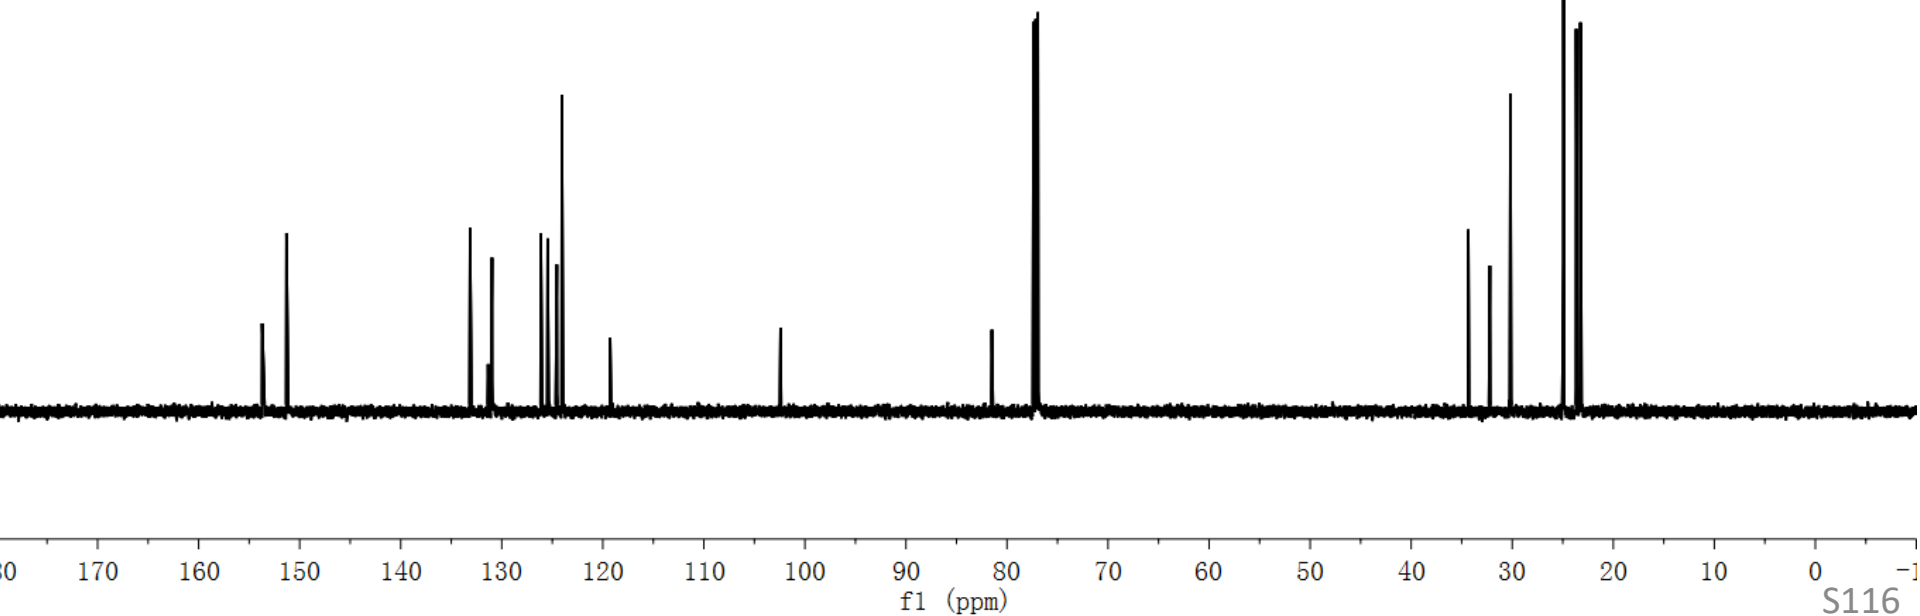

# $^1\text{H}$ NMR of **1d**, 400 MHz, $\text{CDCl}_3$

8.785

7.462  
7.441  
7.260  
7.186  
6.916  
6.894  
6.800

4.250  
4.233  
4.216  
4.200  
4.183  
3.846  
2.942  
2.924  
2.907  
2.890  
2.873

1.291  
1.274  
1.266  
1.248

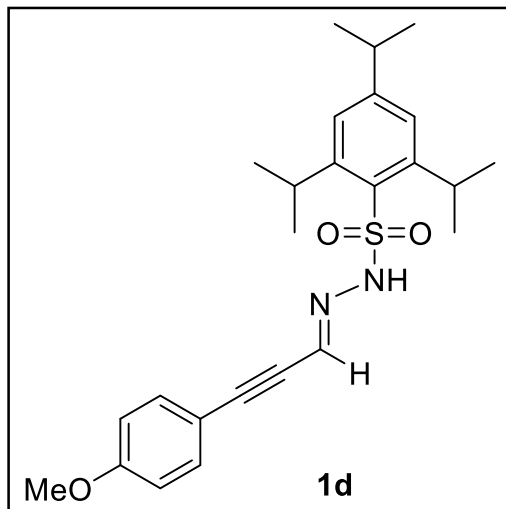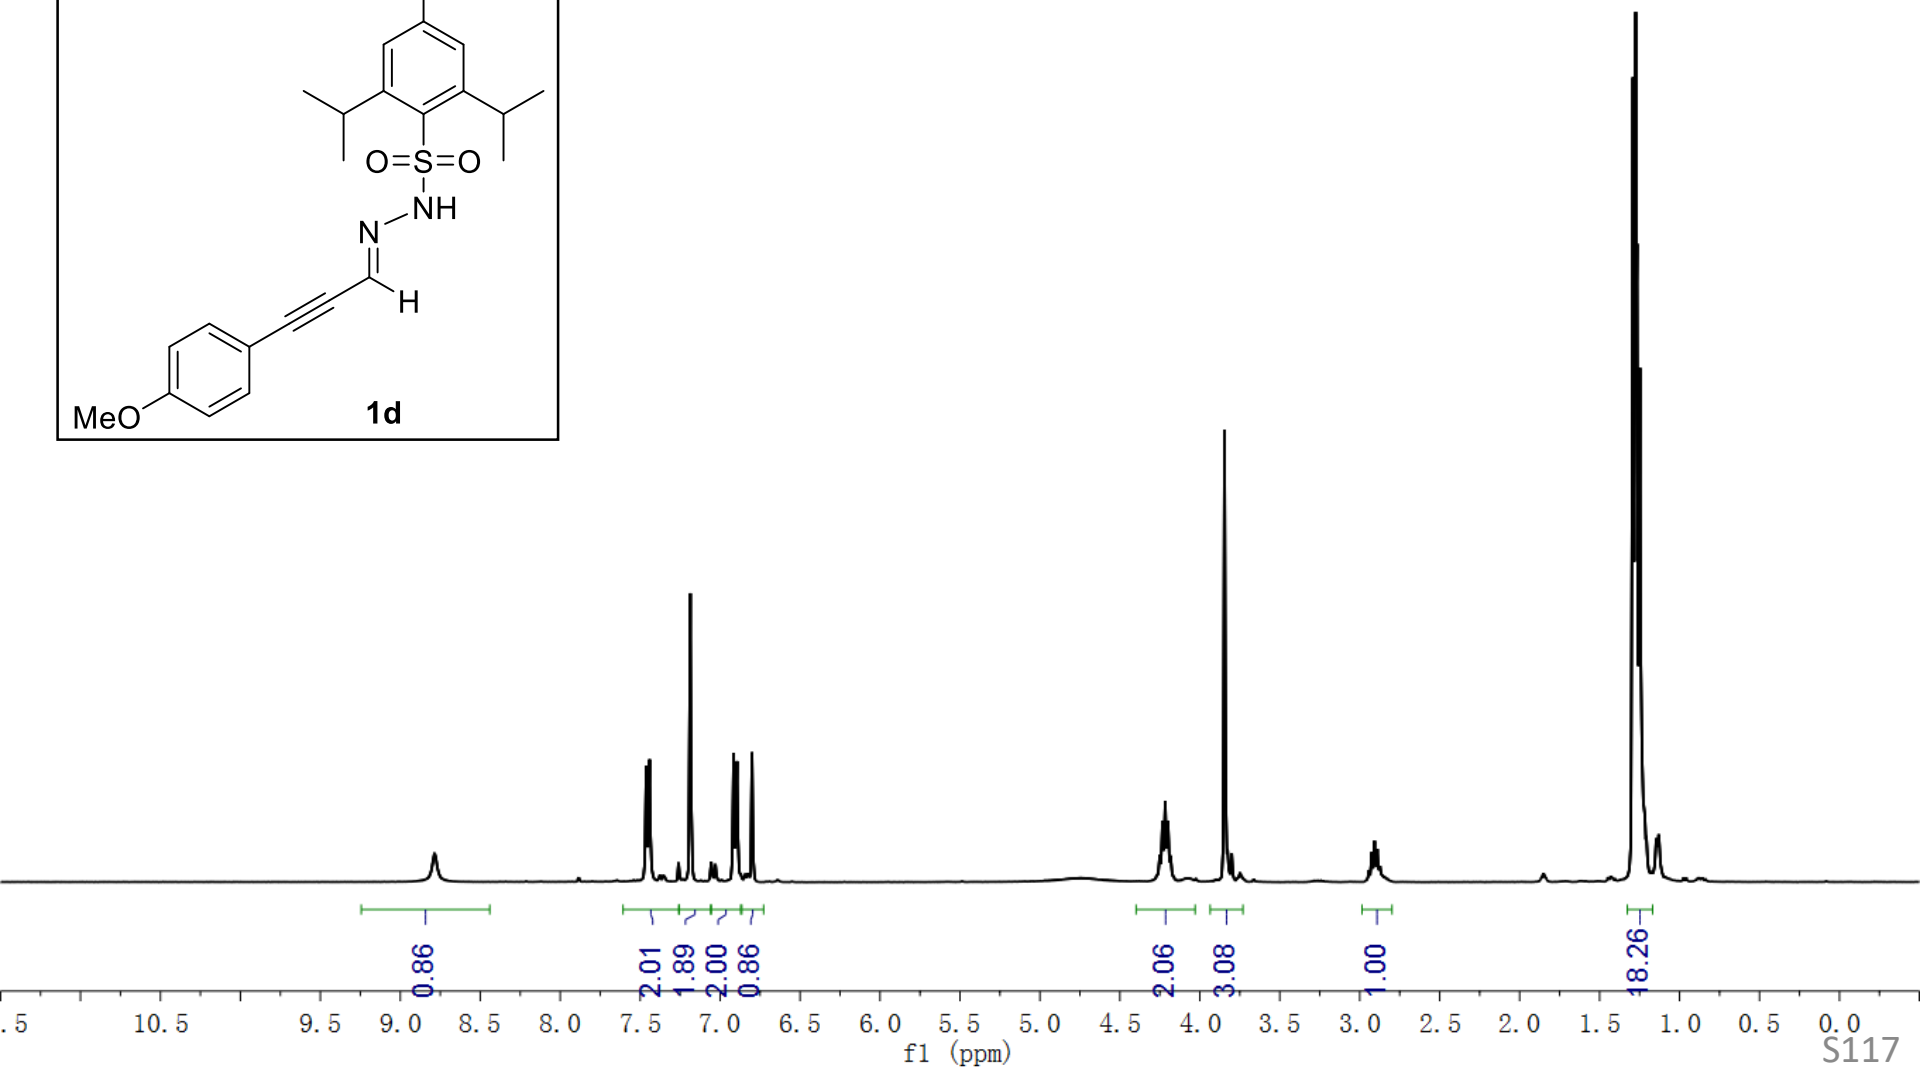

$^{13}\text{C}$  NMR of **1d**, 101 MHz,  $\text{CDCl}_3$

~161.321

~153.615

~151.211

~133.913

~131.359

~124.949

~124.000

~114.528

~112.273

~103.840

77.478

77.160

77.138

76.842

~55.538

~34.299

~30.112

~24.902

~23.634

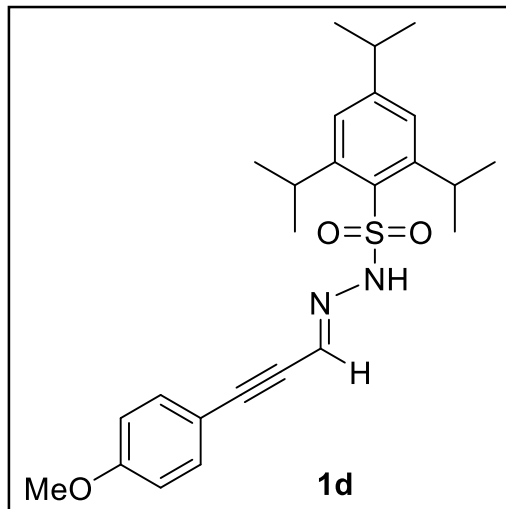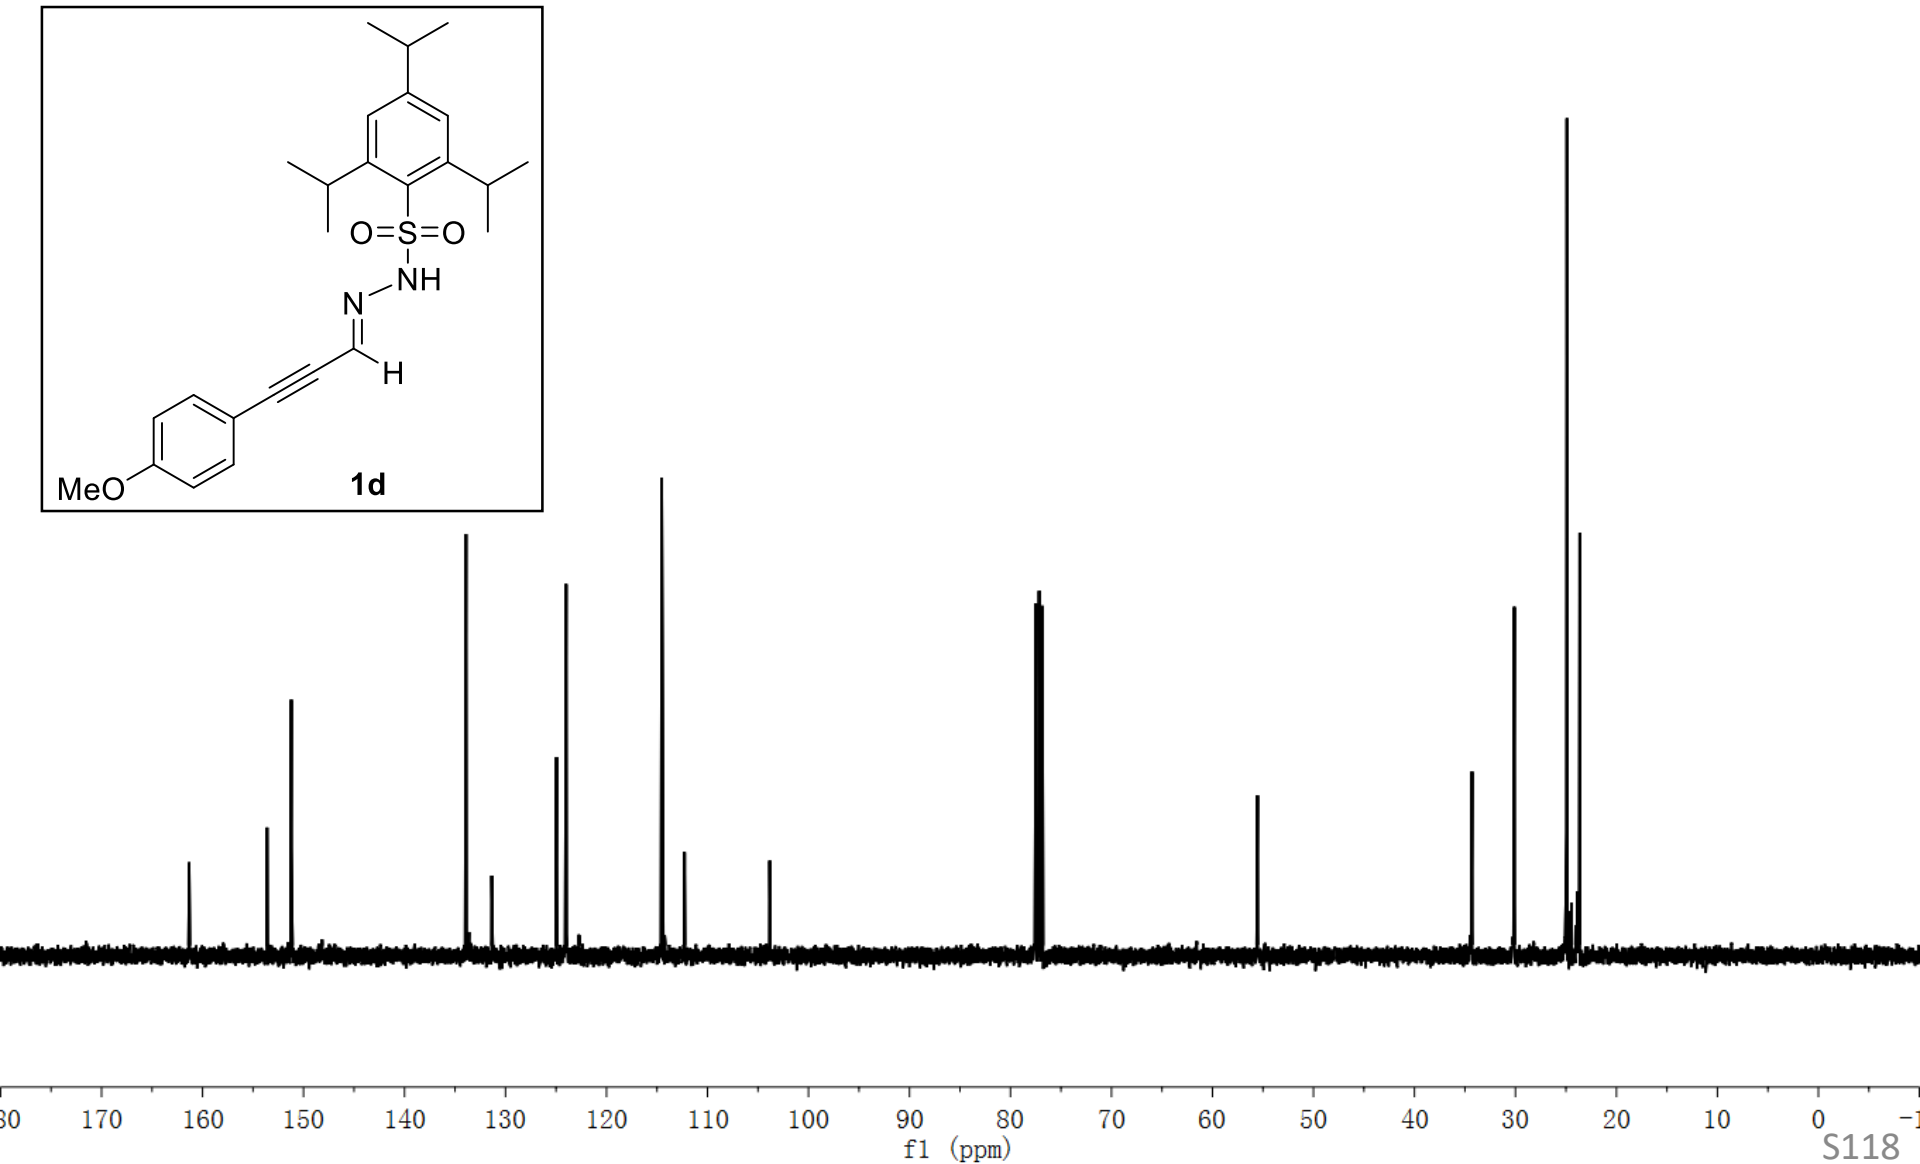

# $^1\text{H}$ NMR of **1e**, 600 MHz, $\text{CDCl}_3$

8.758  
7.325  
7.323  
7.309  
7.307  
7.294  
7.292  
7.187  
7.114  
7.112  
7.110  
7.099  
7.097  
7.095  
7.020  
7.014  
7.000  
6.998  
6.995  
6.993  
6.819  
4.232  
4.218  
4.205  
4.191  
4.178  
3.839  
2.937  
2.923  
2.909  
2.895  
2.882  
1.289  
1.275  
1.266  
1.252

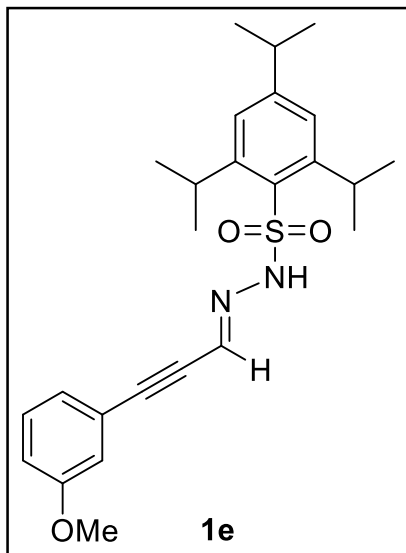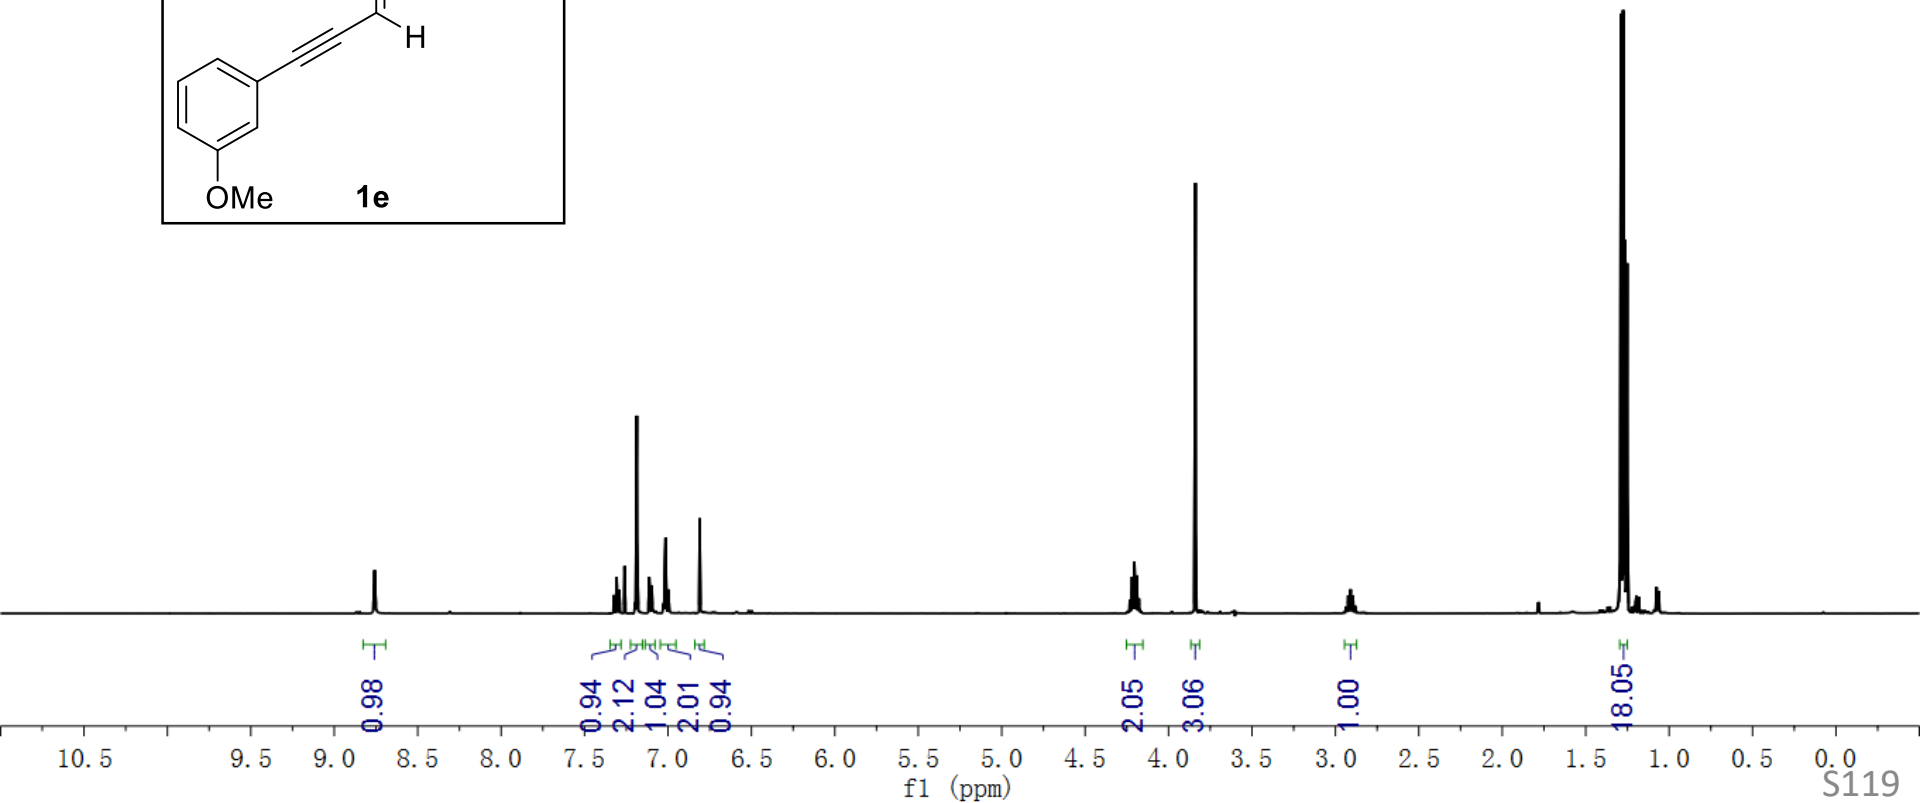

$^{13}\text{C}$  NMR of **1e**, 151 MHz,  $\text{CDCl}_3$

159.629  
153.725  
151.270

131.303  
129.993  
124.734  
124.328  
124.055  
121.328  
117.117  
116.833

103.149

77.465  
77.372  
77.160  
76.948

55.569

34.337  
30.157  
24.928  
23.659

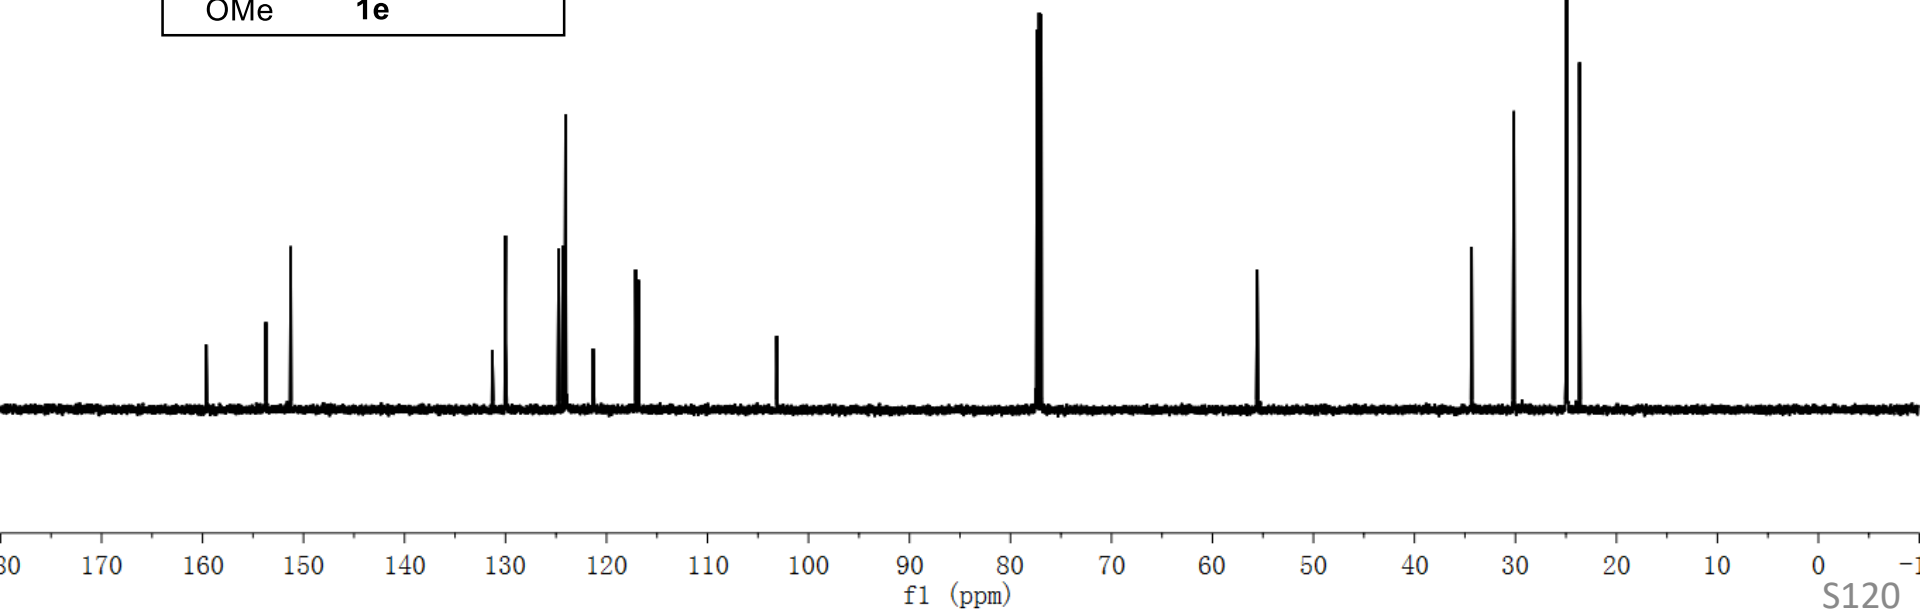



# $^1\text{H}$ NMR of **1f**, 600 MHz, $\text{CDCl}_3$

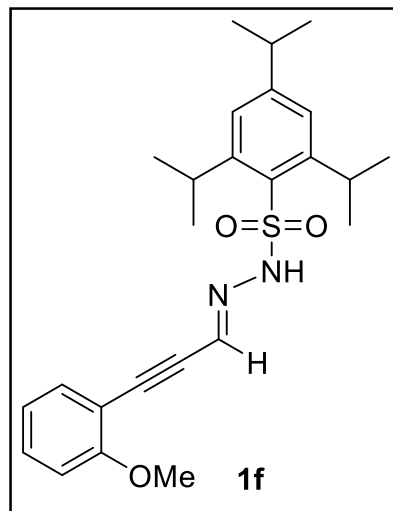

9.664

7.459  
7.457  
7.445  
7.433  
7.431  
7.409  
7.396  
7.177  
7.027  
7.013  
6.993  
6.980  
6.968  
6.968  
6.743

4.310  
4.299  
4.288  
4.277  
4.265  
4.254  
4.243  
4.097  
2.937  
2.926  
2.914  
2.903  
2.891  
2.880  
2.868

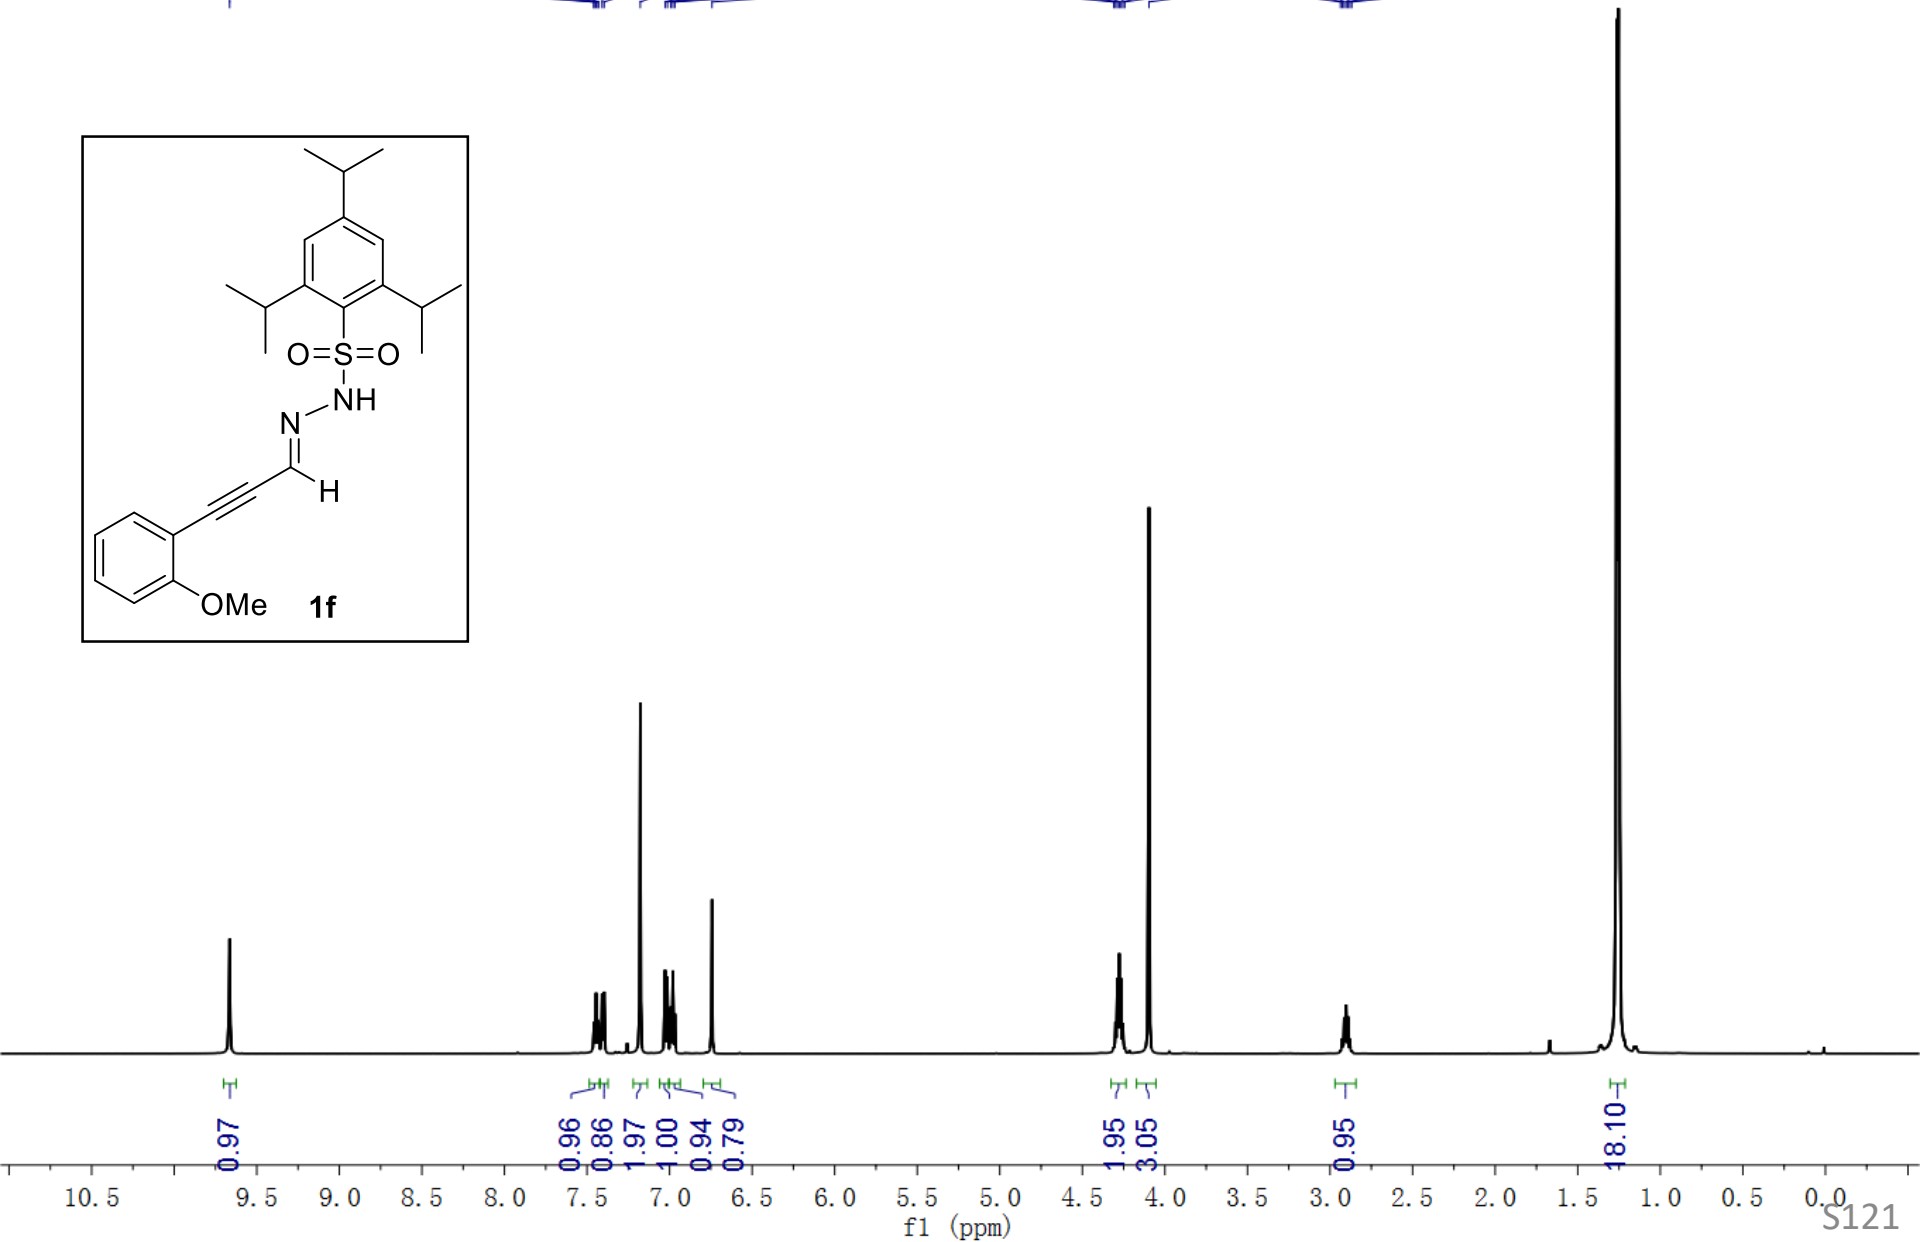

$^{13}\text{C}$  NMR of **1f**, 151 MHz,  $\text{CDCl}_3$

—160.724

—153.382

—151.029

—132.327

—132.206

—131.813

—124.002

—123.896

—120.897

—110.644

—109.741

—101.193

—83.829

—77.373

—77.160

—76.948

—55.987

—34.242

—29.925

—24.868

—23.611

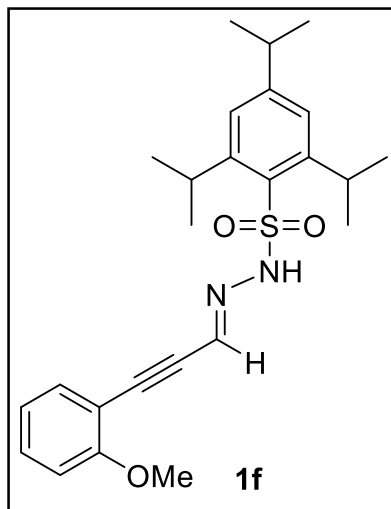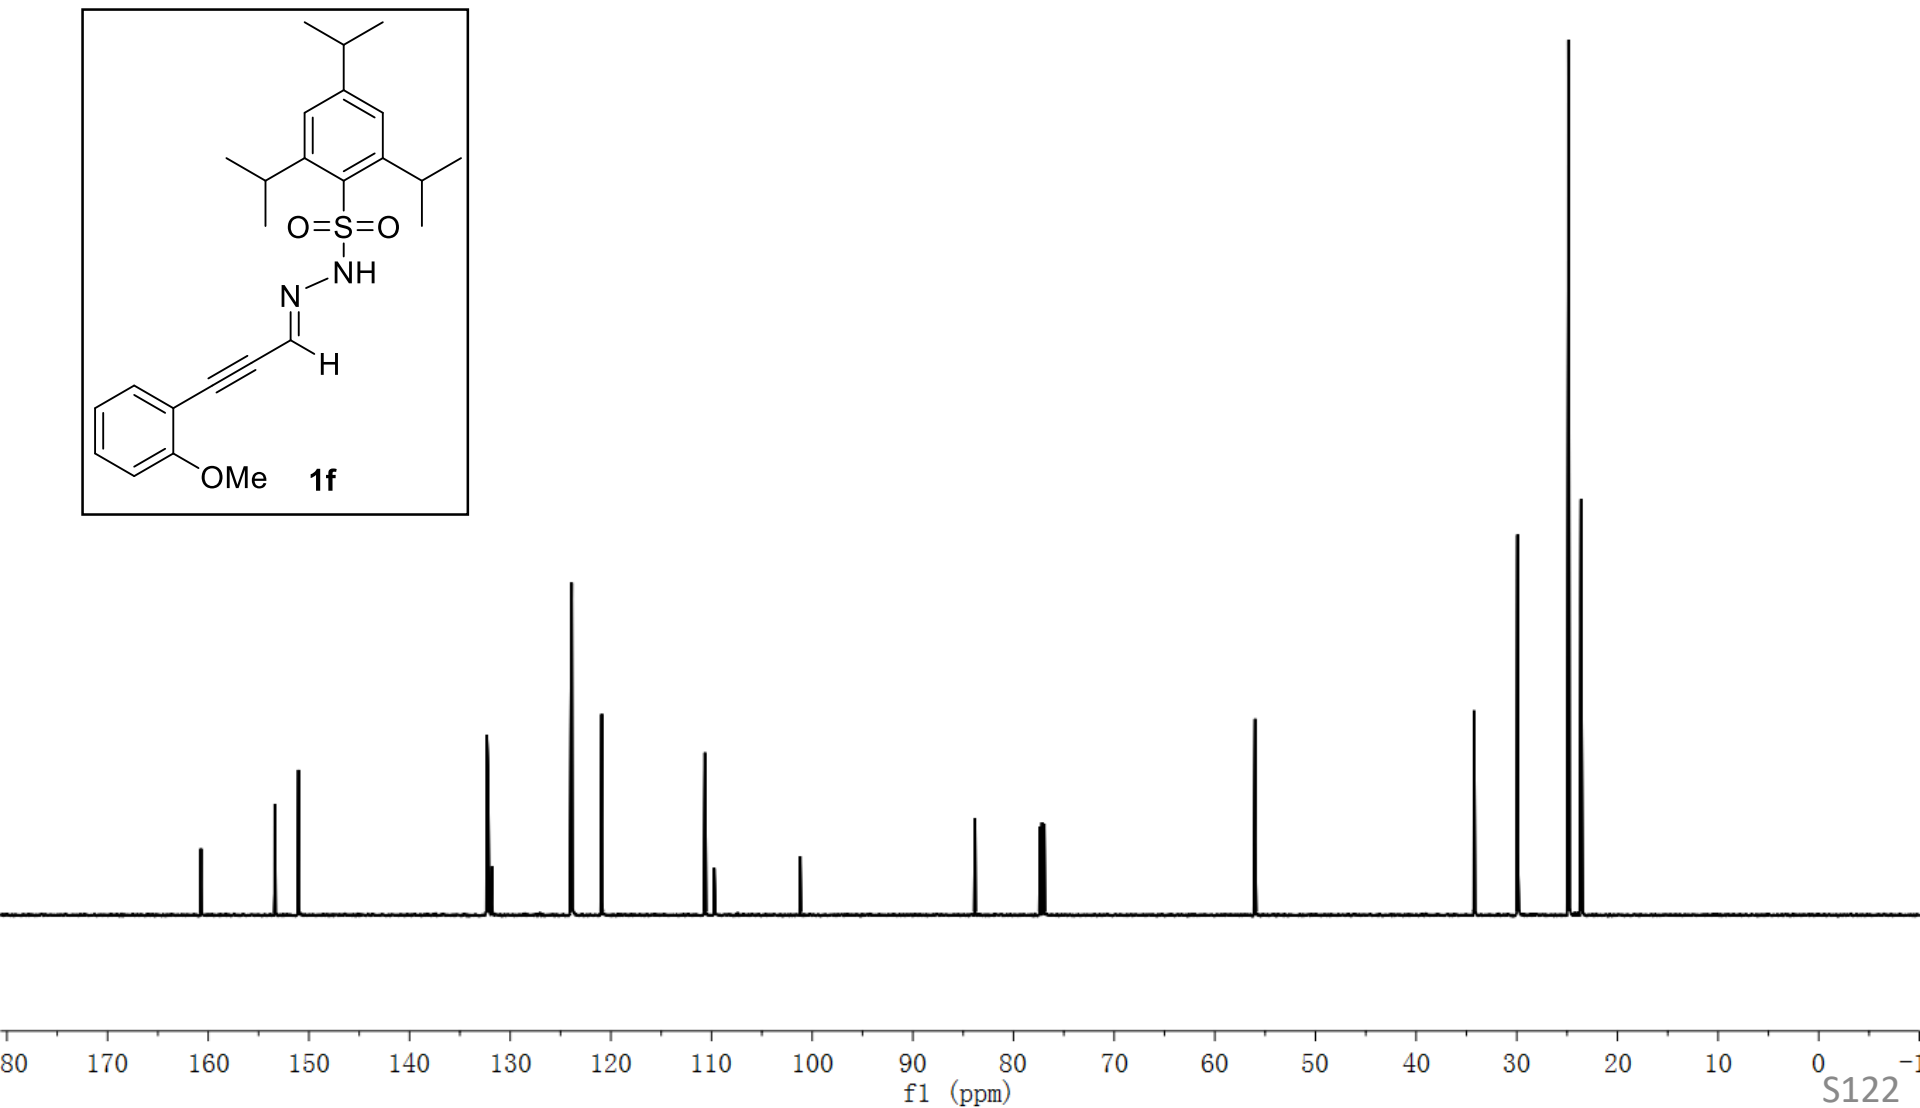

<sup>1</sup>H NMR of **1g**, 600 MHz, CDCl<sub>3</sub>

8.895  
7.678  
7.672  
7.659  
7.655  
7.611  
7.607  
7.597  
7.590  
6.818

4.232  
4.219  
4.205  
4.192  
4.178  
4.165  
4.151  
2.955  
2.941  
2.927  
2.913  
2.899  
2.885  
2.872

1.278  
1.265  
1.253

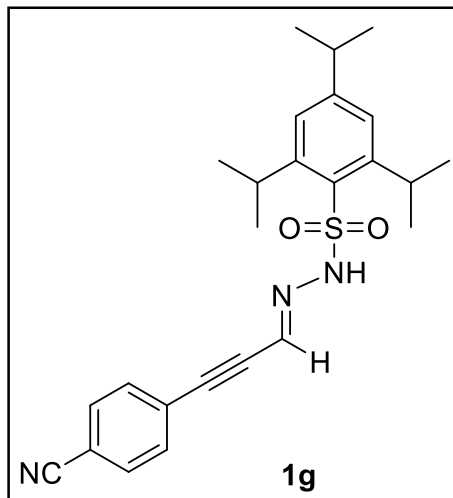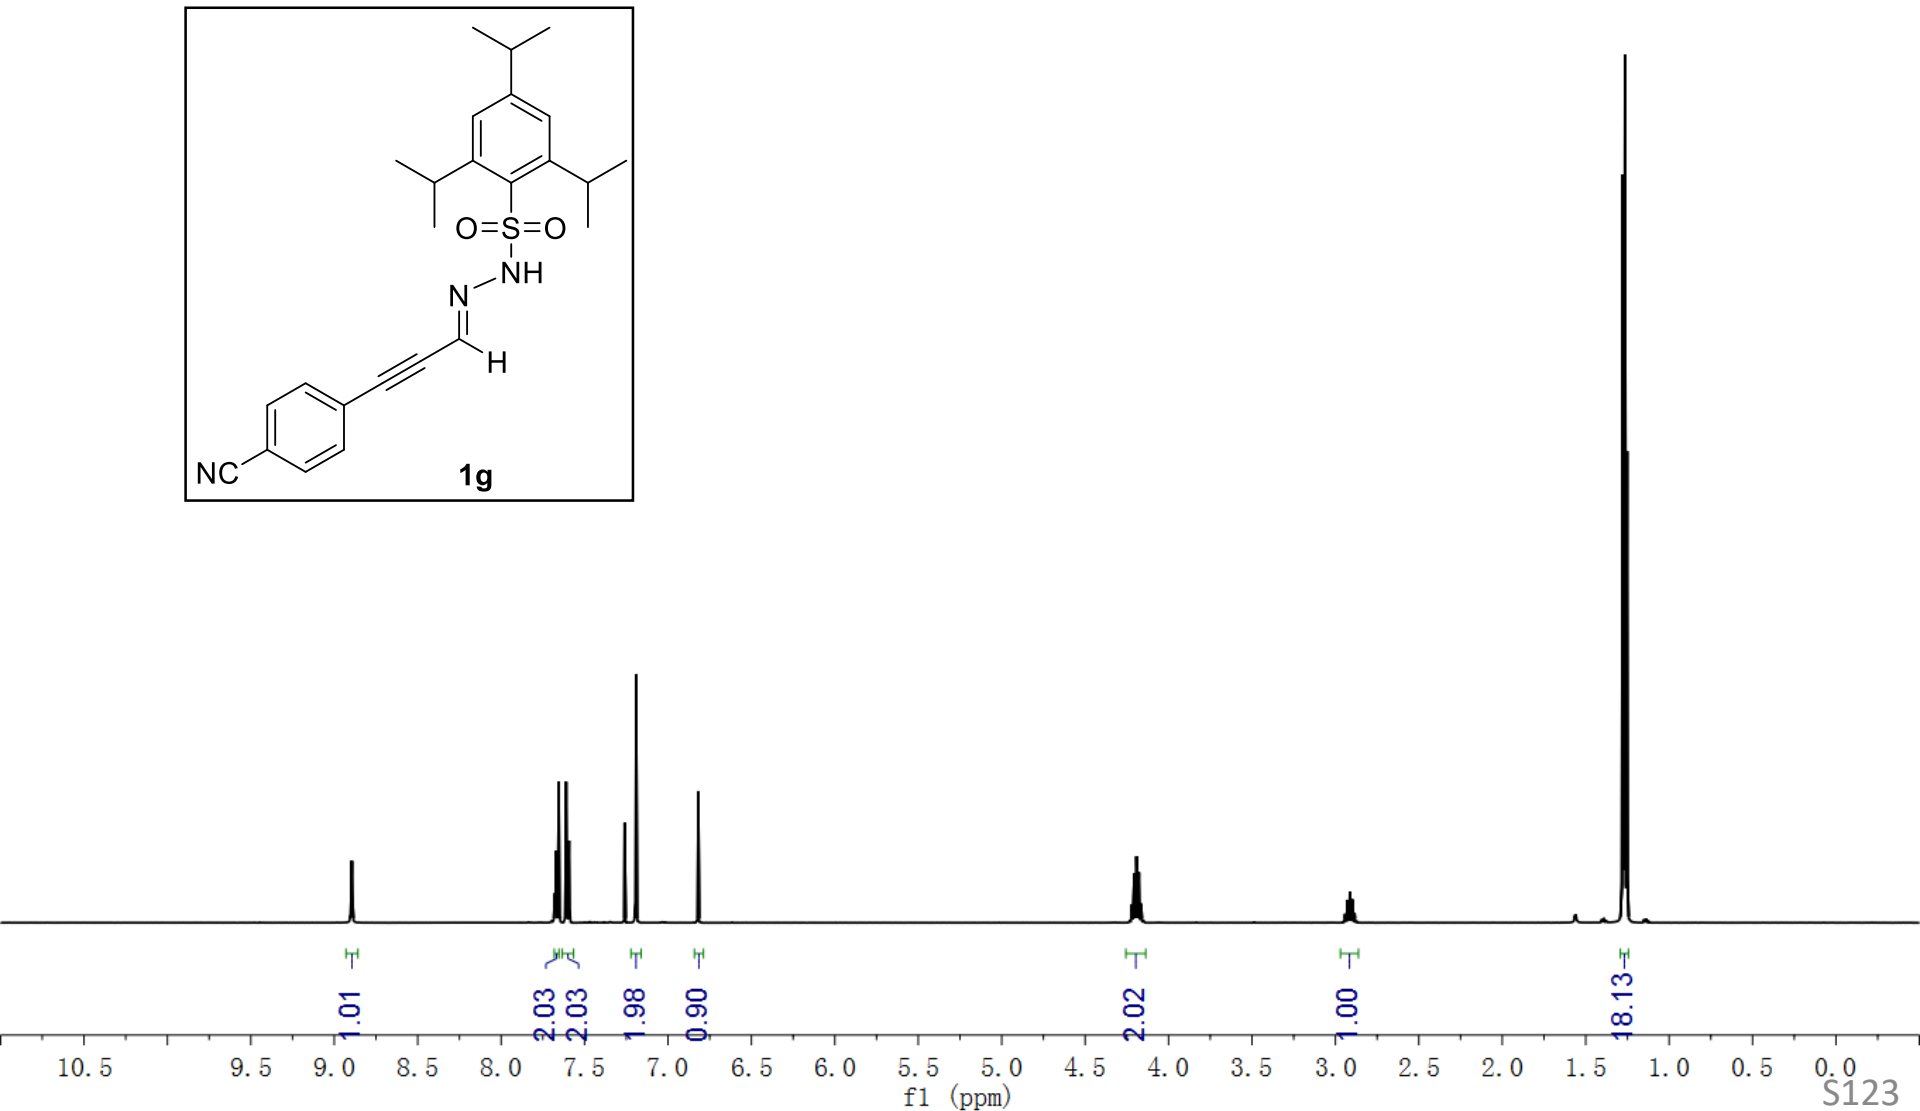

$^{13}\text{C}$  NMR of **1g**, 151 MHz,  $\text{CDCl}_3$

153.987  
151.362

132.672  
132.441  
131.037  
125.175  
124.120  
122.987  
118.005  
113.818

100.348

80.979  
77.371  
77.160  
76.948

34.351  
30.139  
24.898  
23.655

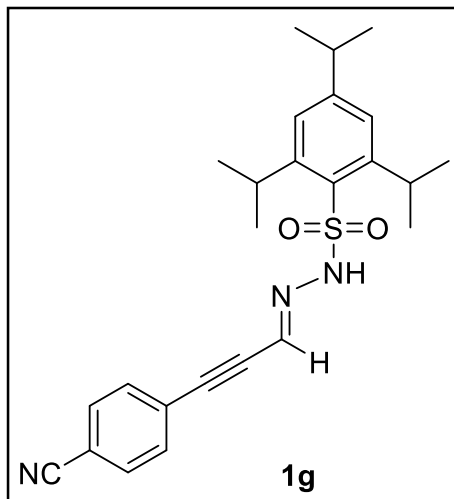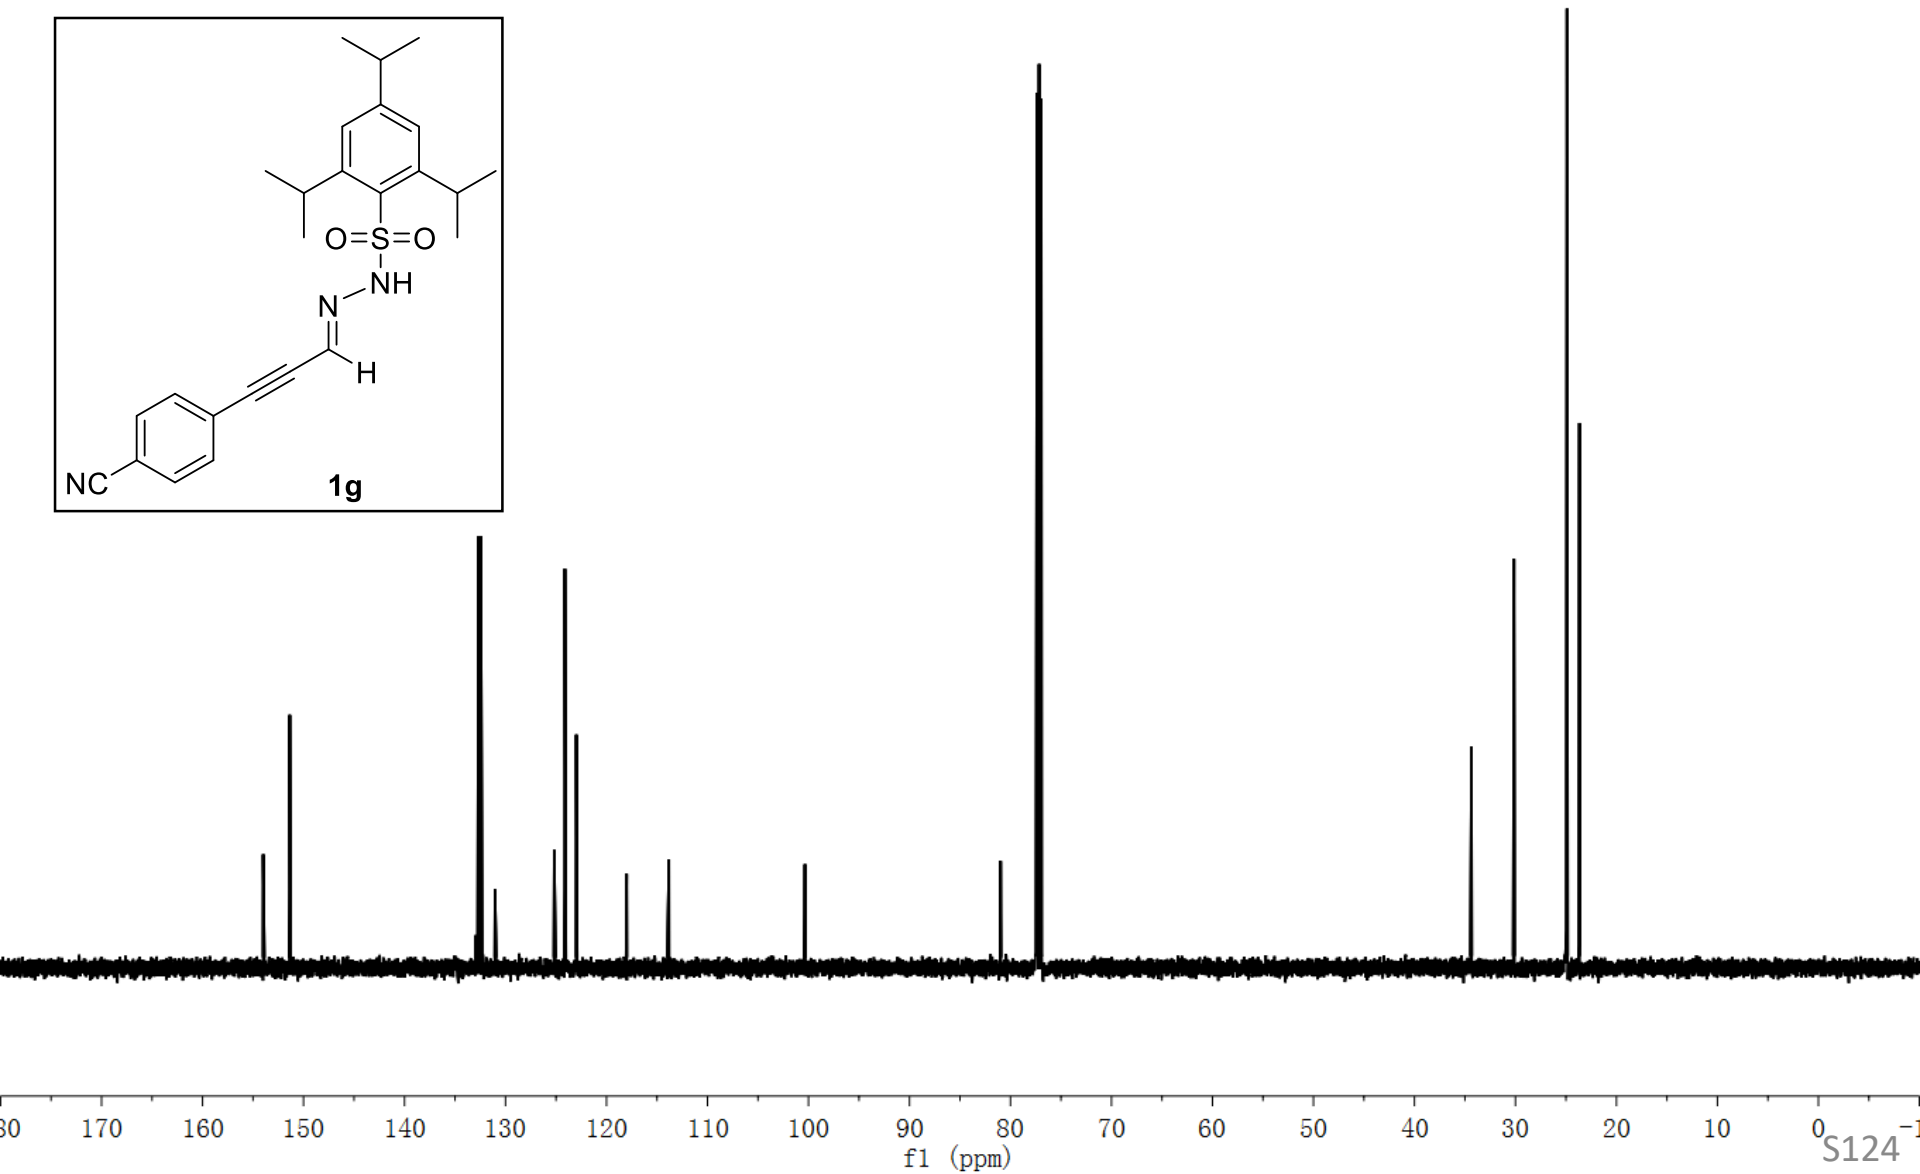

<sup>1</sup>H NMR of **1h**, 600 MHz, CDCl<sub>3</sub>

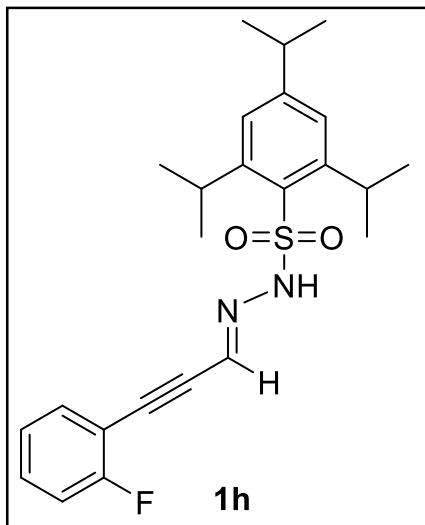

9.211

7.417

7.405

7.393

7.350

7.336

7.324

7.312

7.299

7.223

7.090

7.077

7.064

7.058

7.044

7.029

4.284

4.273

4.262

4.251

4.240

4.229

4.218

2.958

2.946

2.935

2.923

2.912

2.900

2.889

1.333

1.322

1.277

1.265

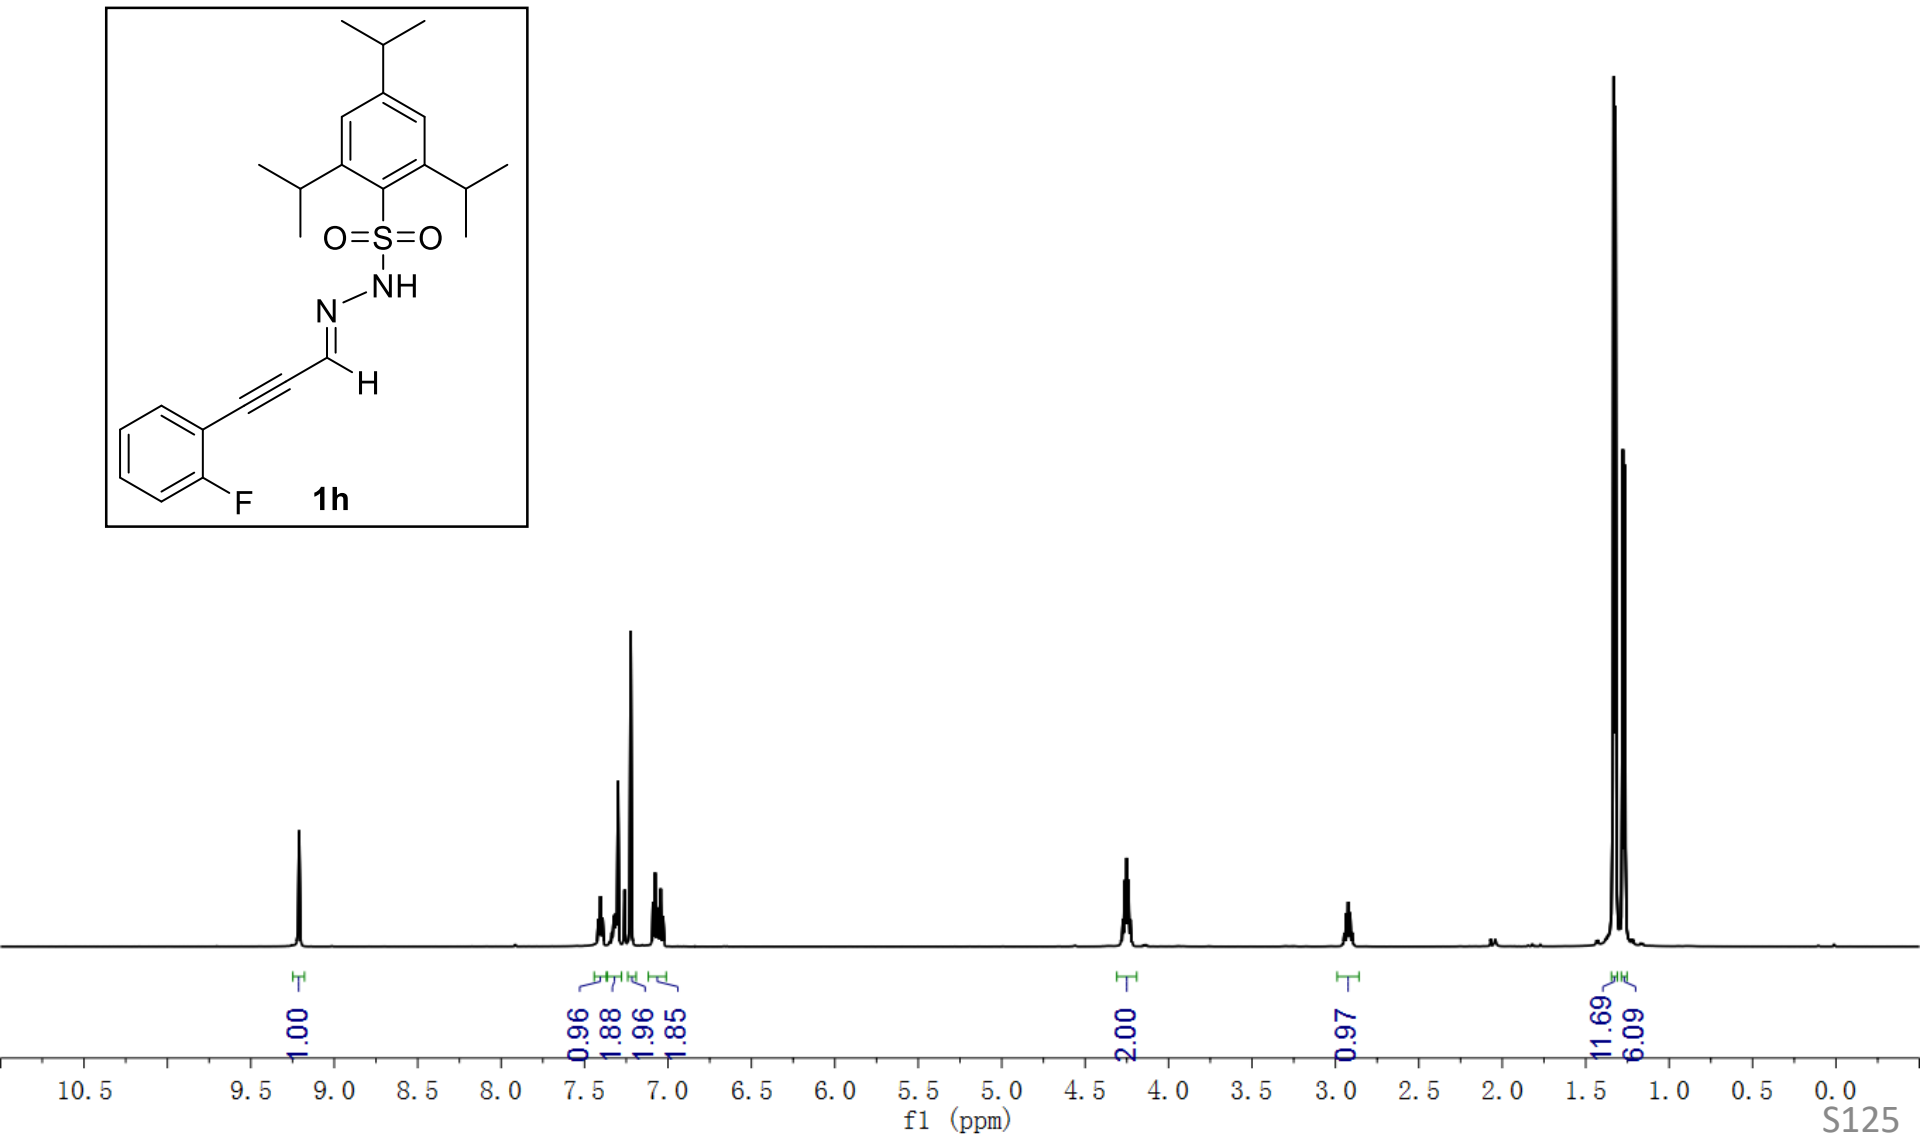

$^{13}\text{C}$  NMR of **1h**, 151 MHz,  $\text{CDCl}_3$

~163.732  
~162.051

~153.840  
~151.688

133.753  
131.327  
131.274  
131.023  
128.888

124.190  
124.165  
124.145  
115.773  
115.637  
110.520  
110.417

88.784  
88.764  
87.255  
77.371  
77.160  
76.948

~34.317  
~30.196  
~24.930  
~23.622

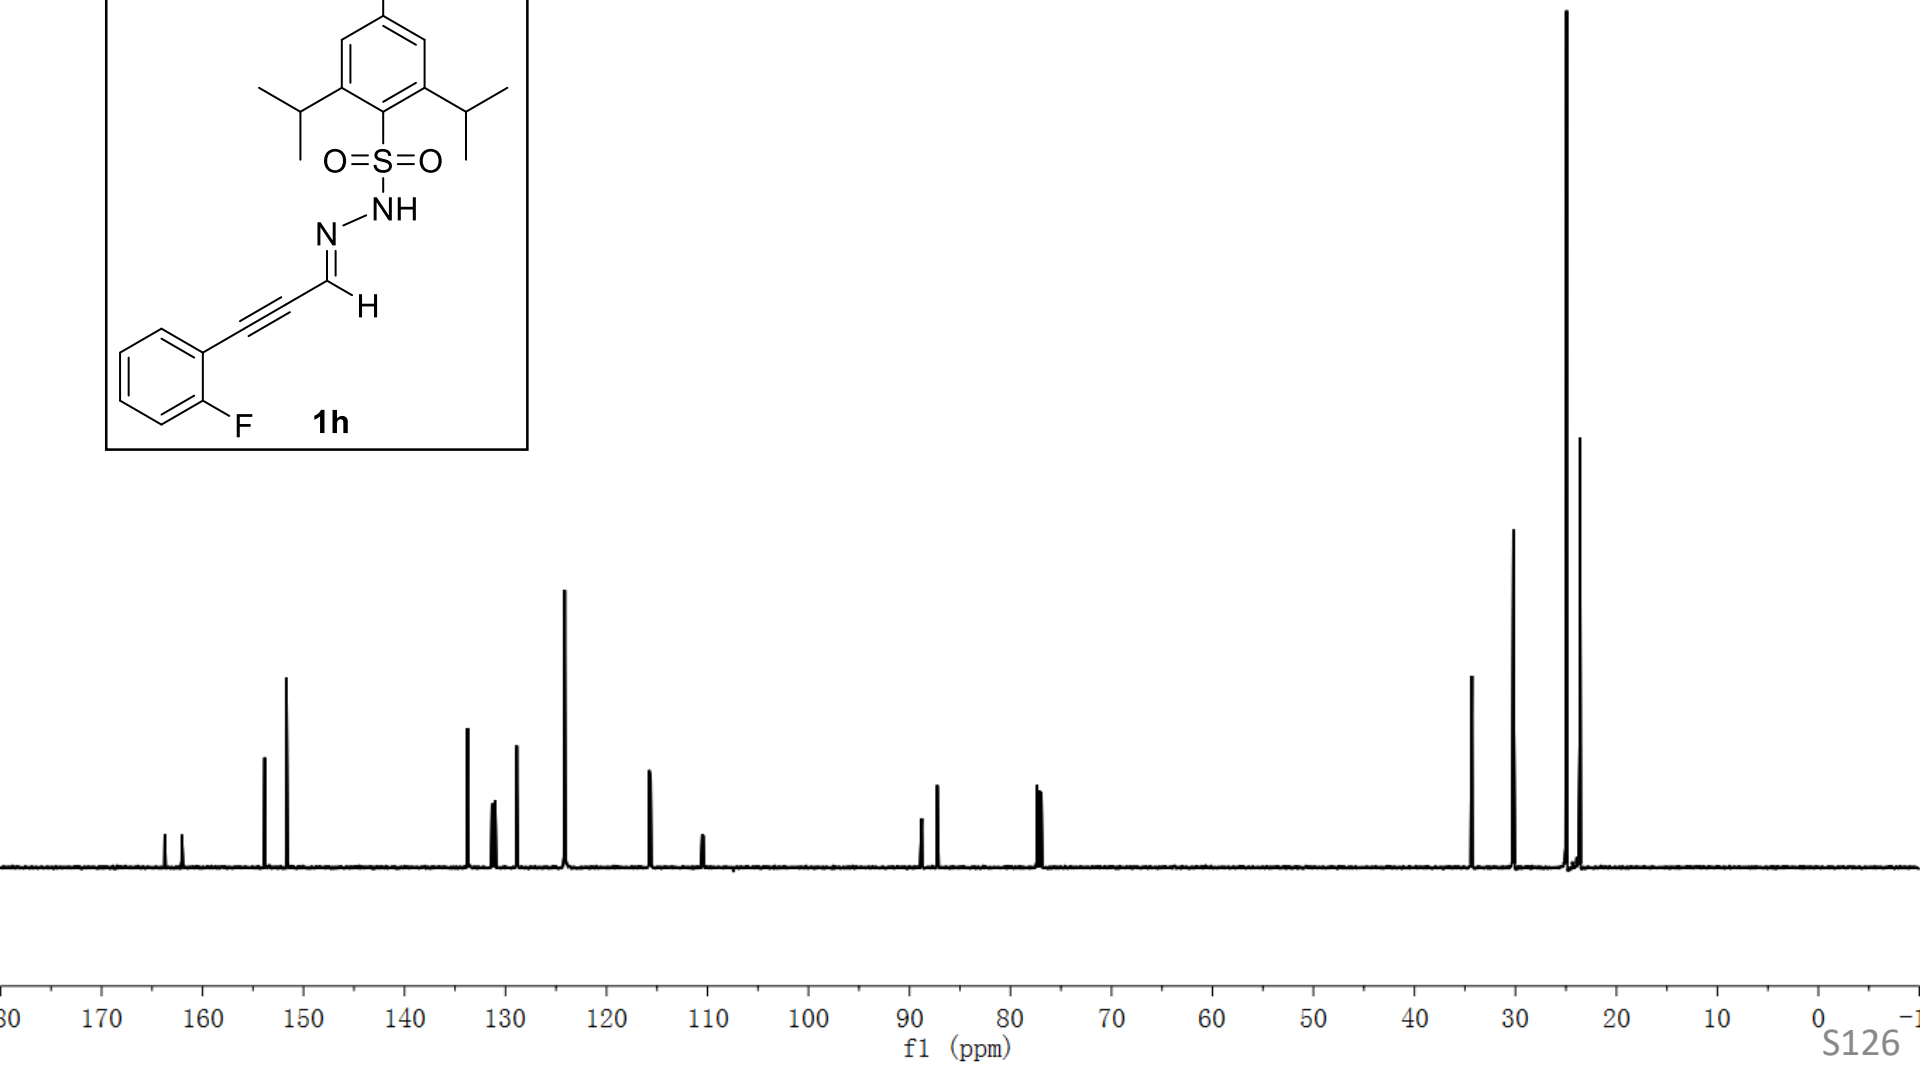

$^{19}\text{F}$  NMR of **1h**, 564 MHz,  $\text{CDCl}_3$

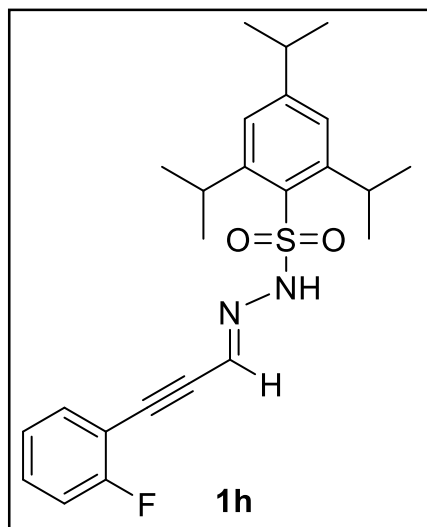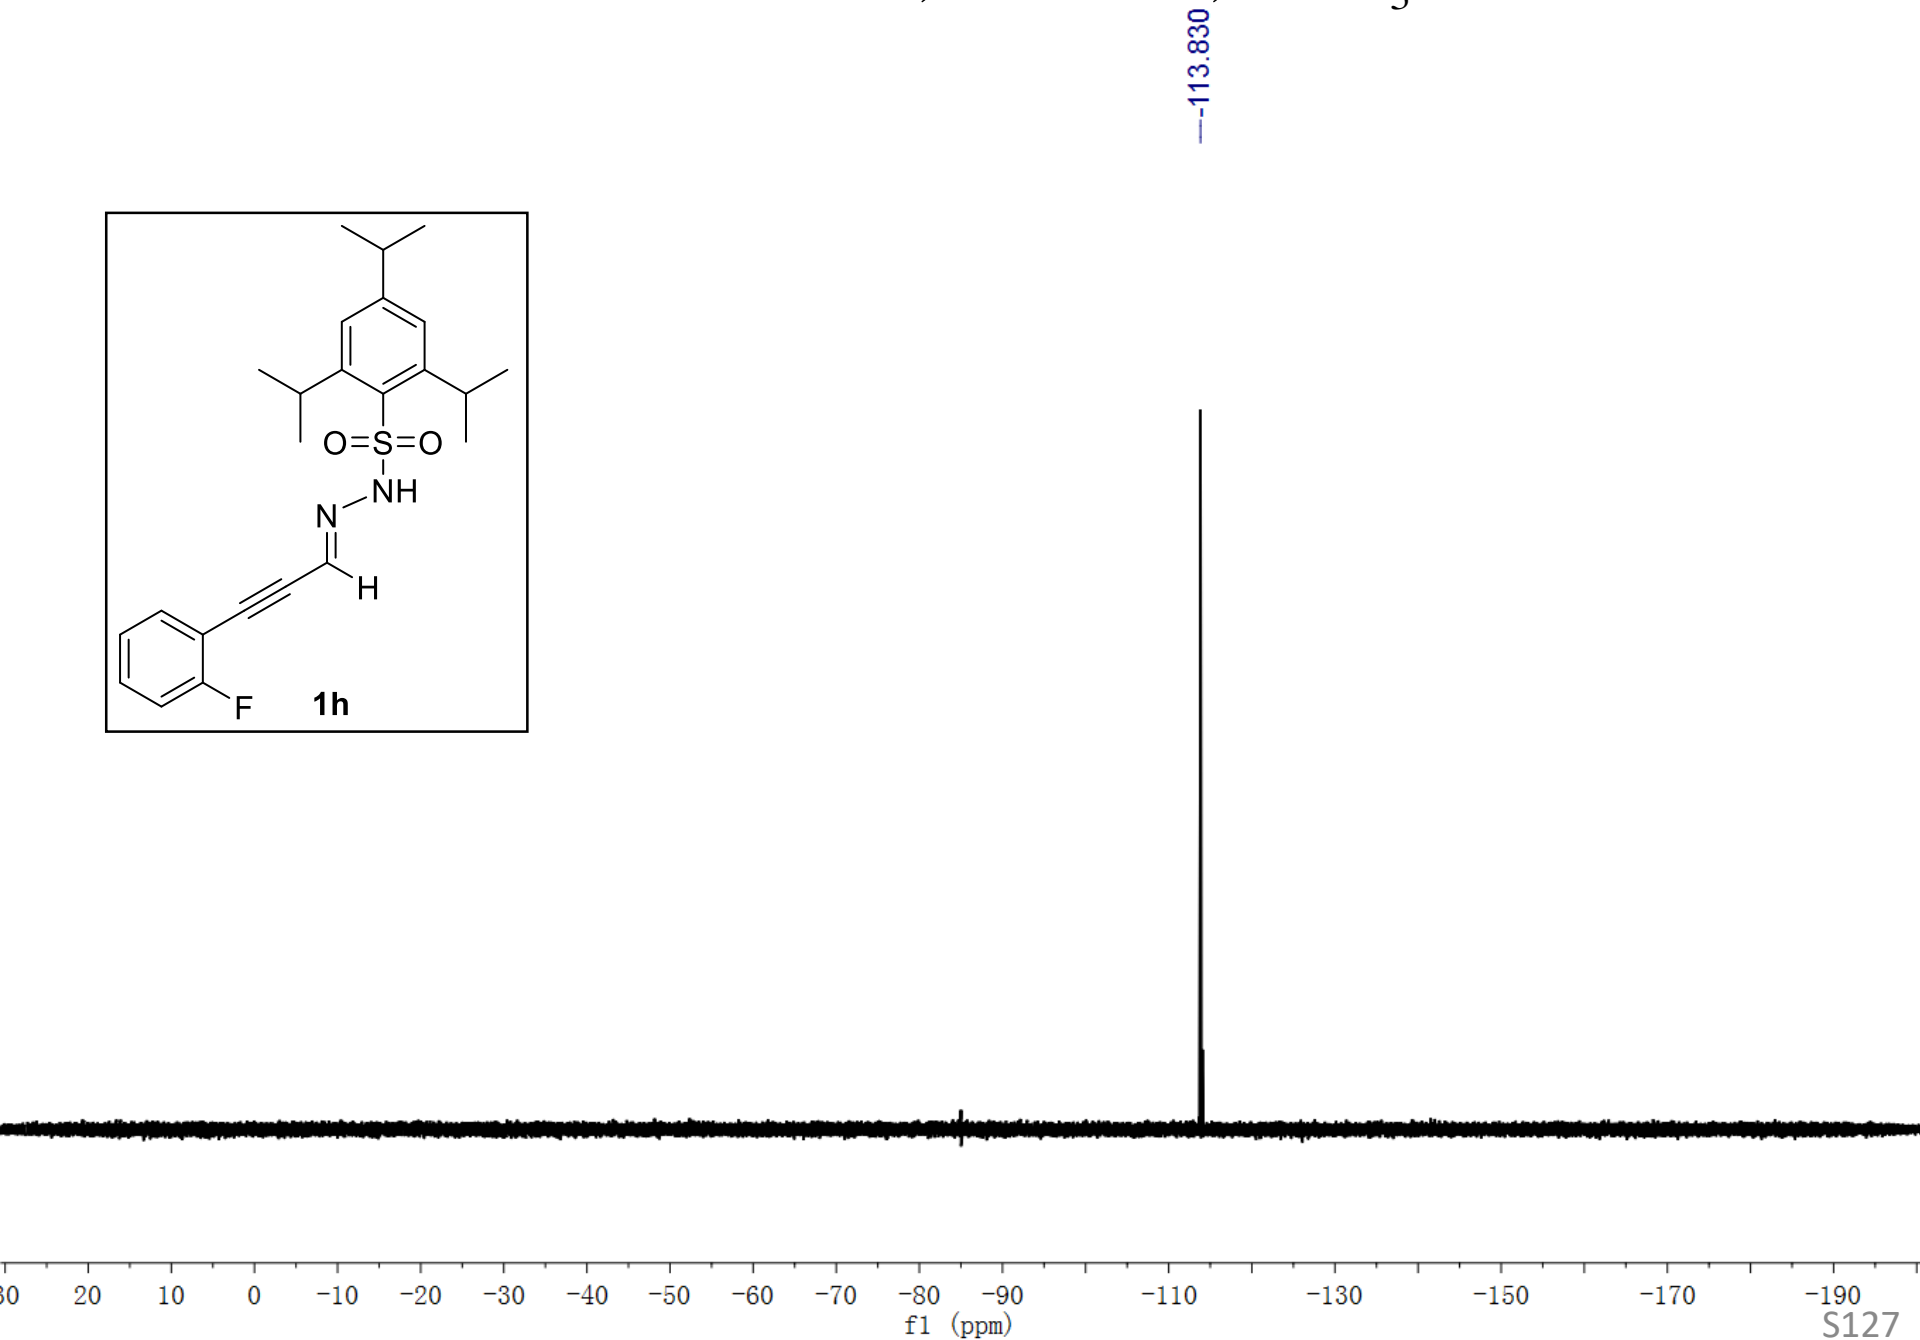

# $^1\text{H}$ NMR of **1i**, 600 MHz, $\text{CDCl}_3$

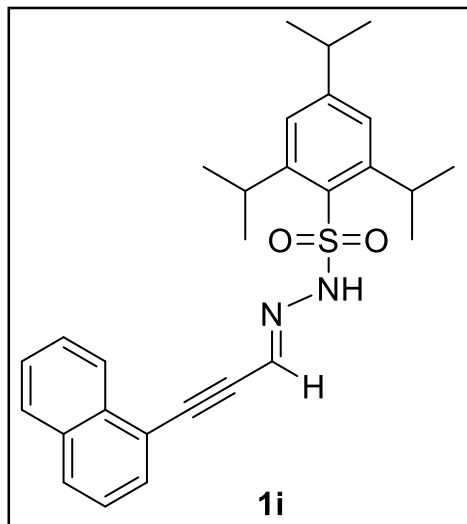

Chemical shift values (ppm) are listed above the spectrum:

- 8.877
- 8.209
- 8.193
- 7.974
- 7.957
- 7.920
- 7.904
- 7.787
- 7.773
- 7.635
- 7.620
- 7.618
- 7.599
- 7.597
- 7.583
- 7.521
- 7.505
- 7.490
- 7.260
- 7.200
- 6.975
- 4.272
- 4.259
- 4.245
- 4.232
- 4.218
- 2.944
- 2.930
- 2.917
- 2.903
- 2.889
- 1.306
- 1.298
- 1.284
- 1.272
- 1.258

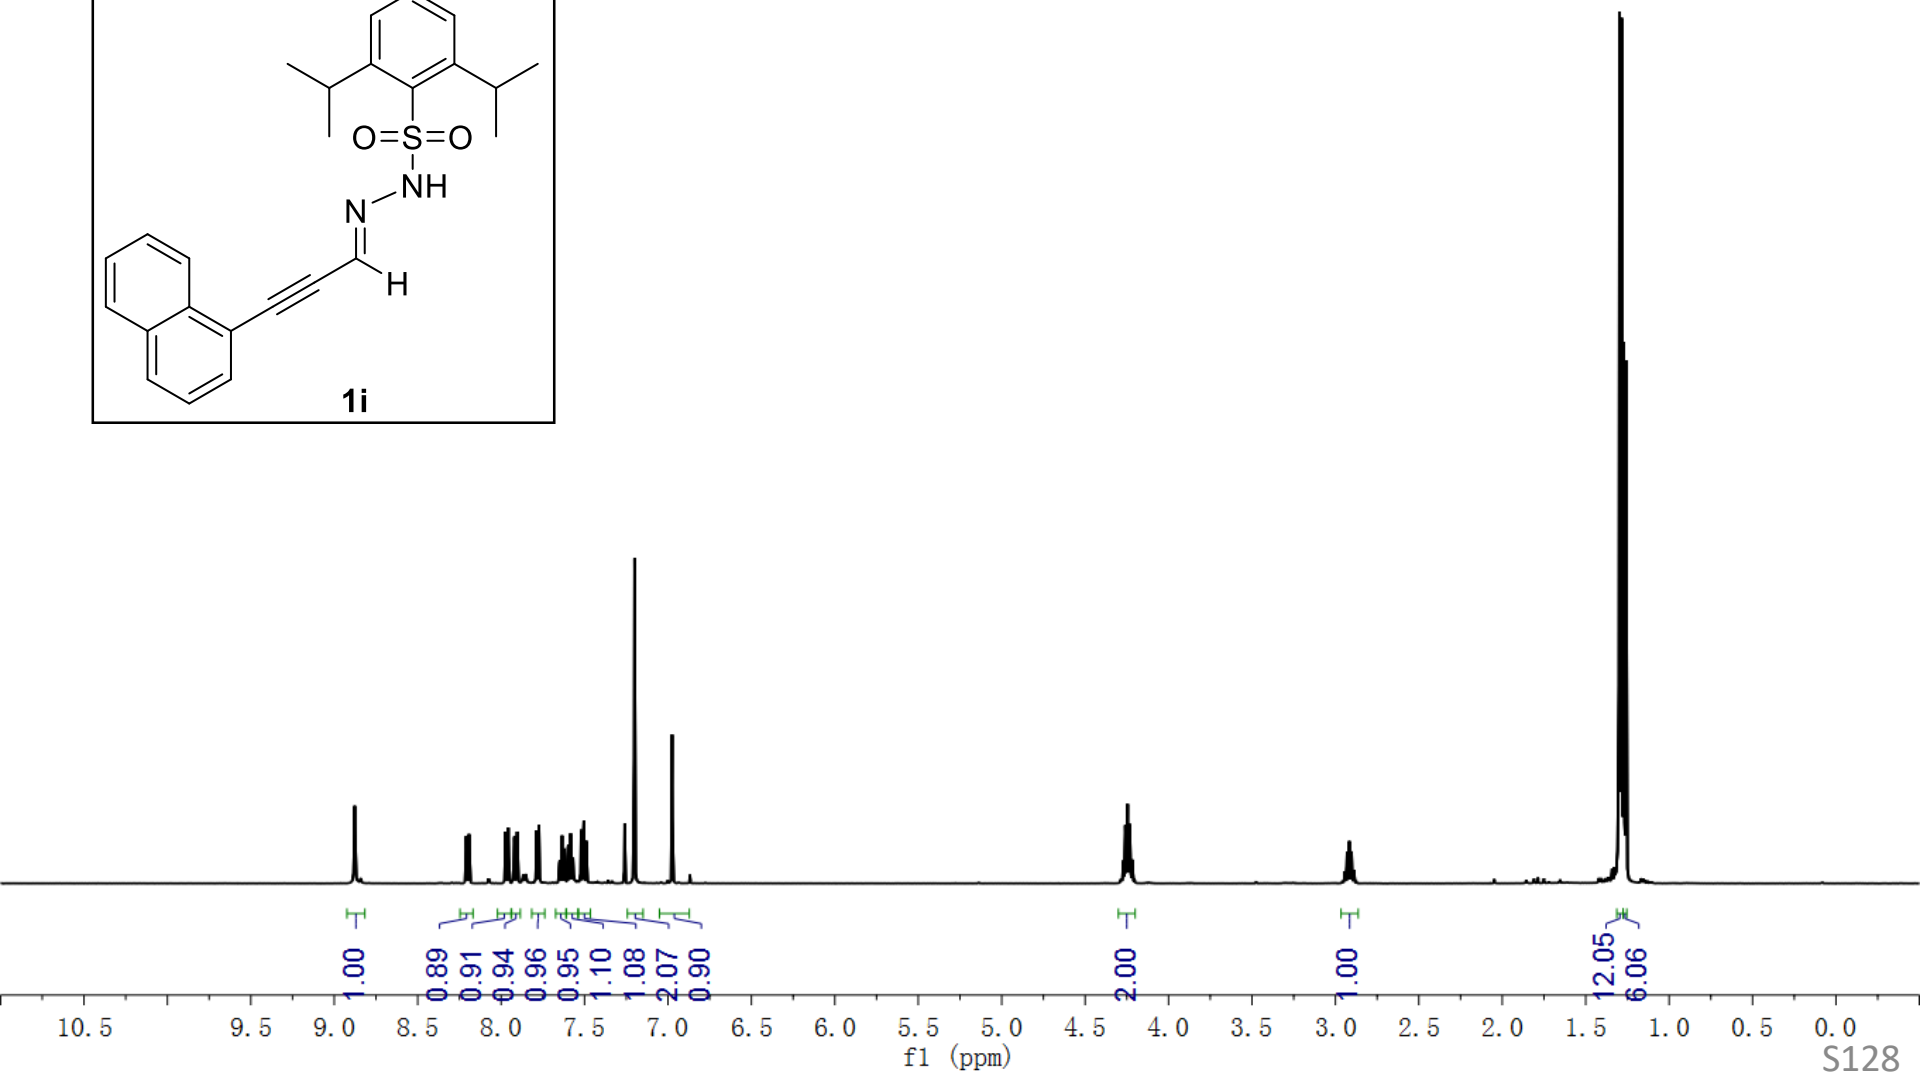



$^{13}\text{C}$  NMR of **1i**, 151 MHz,  $\text{CDCl}_3$

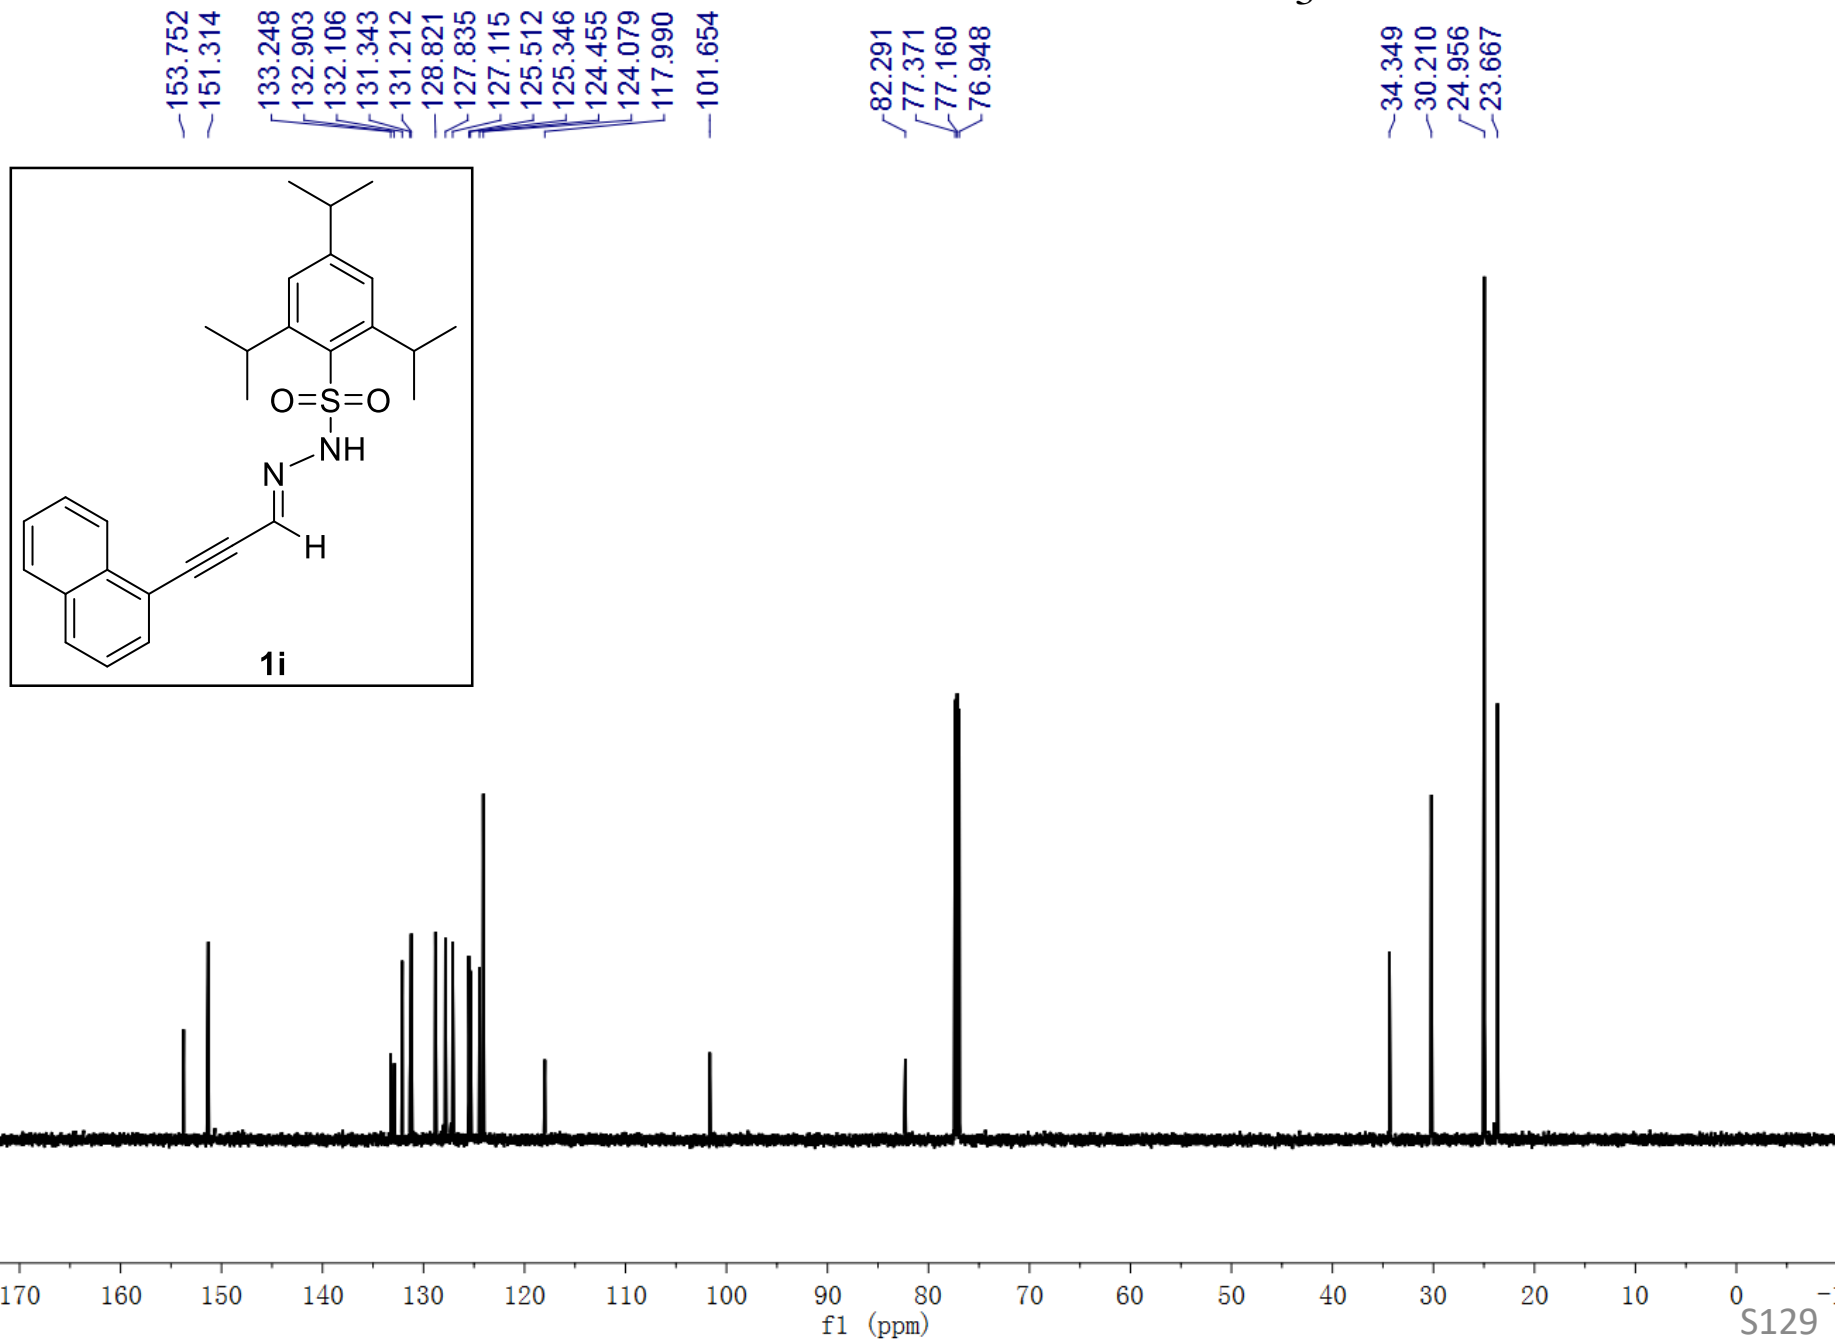

<sup>1</sup>H NMR of **1j**, 500 MHz, CDCl<sub>3</sub>

8.521, 7.382, 7.367, 7.352, 7.290, 7.276, 7.260, 7.245, 7.230, 7.160, 6.533, 4.143, 4.130, 4.116, 4.103, 4.089, 2.915, 2.901, 2.886, 2.781, 2.767, 2.753, 1.258, 1.243, 1.229

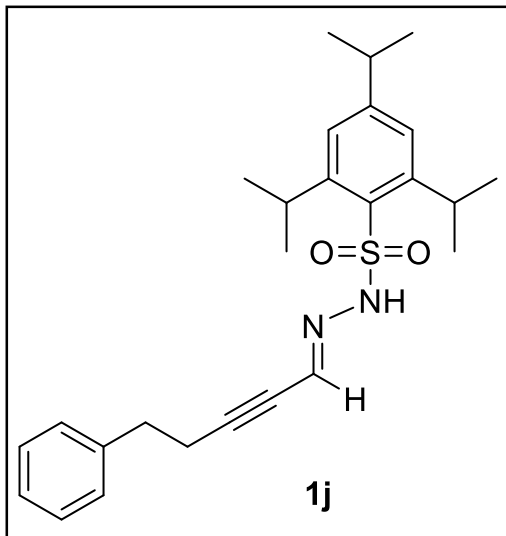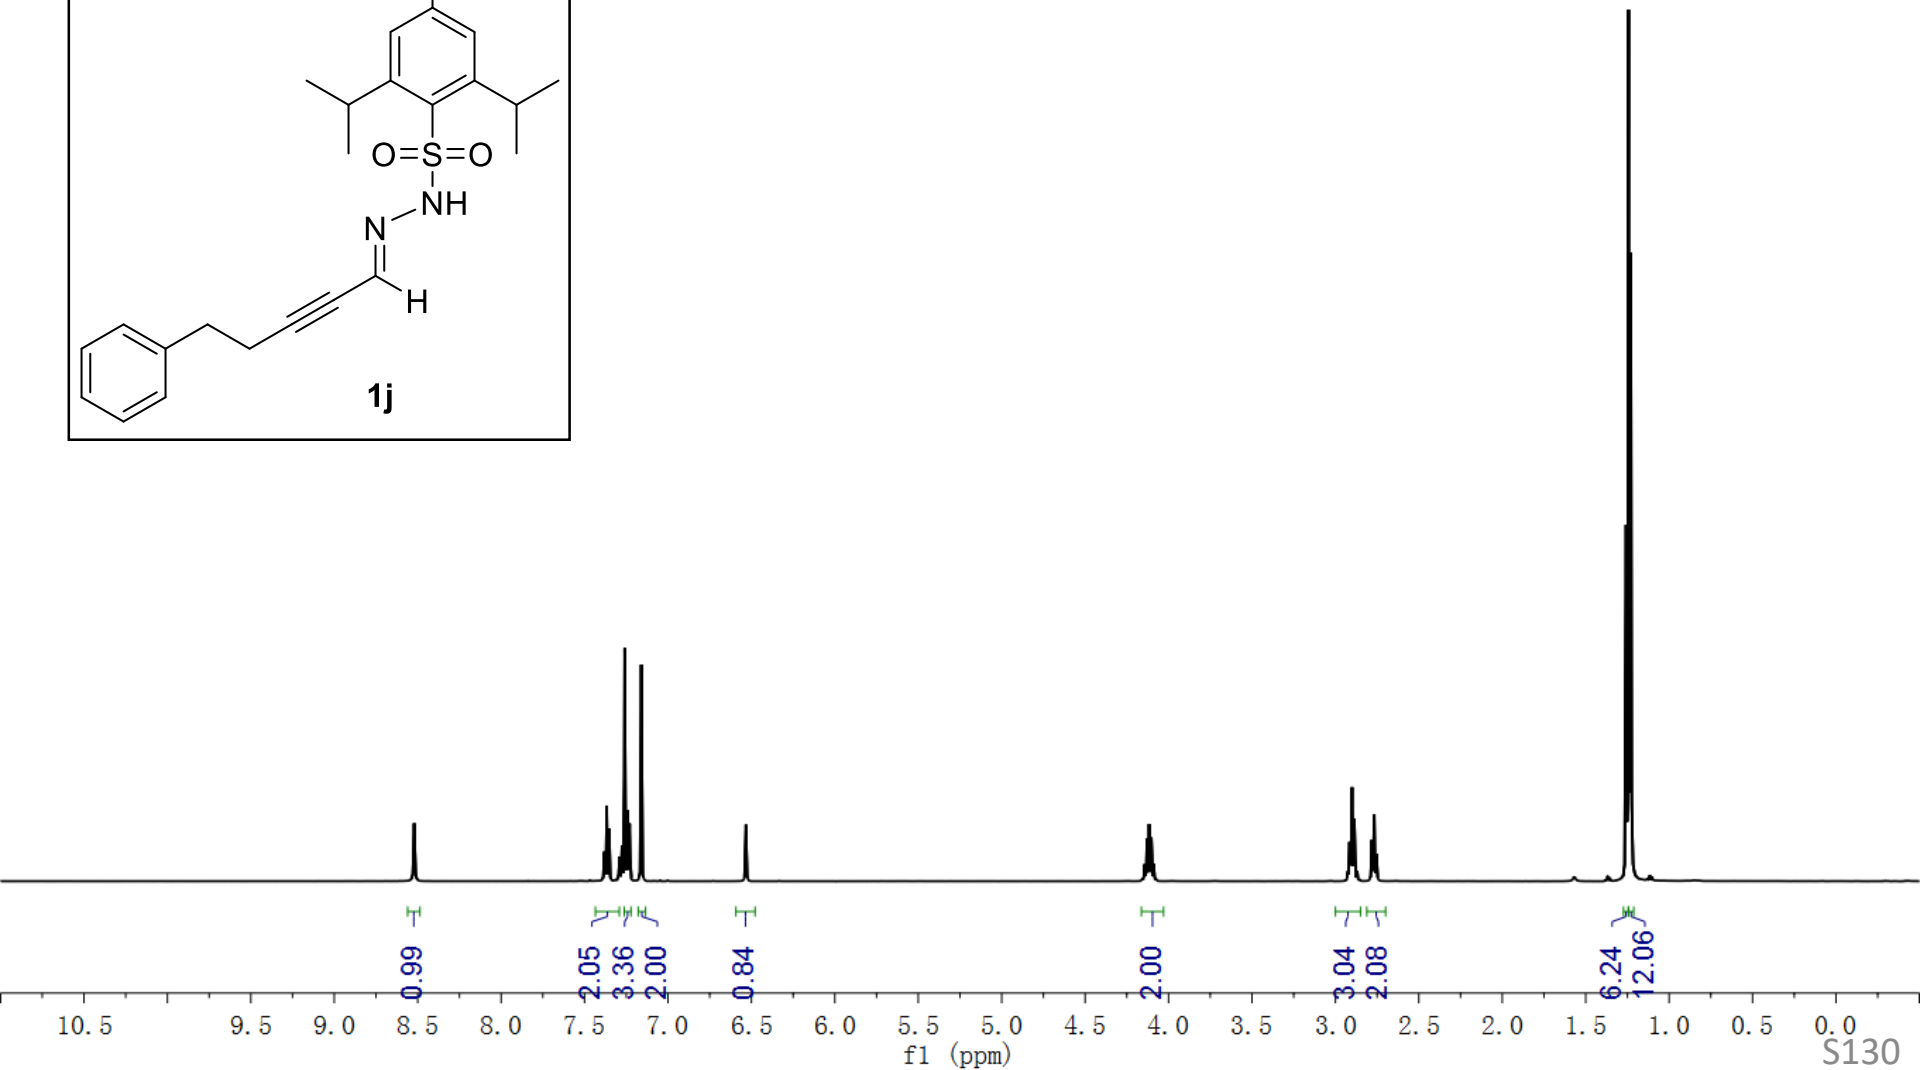

$^{13}\text{C}$  NMR of **1j**, 126 MHz,  $\text{CDCl}_3$

153.538  
151.202

139.568  
131.394  
128.958  
128.393  
127.025  
124.725  
123.968

104.840

77.414  
77.362  
77.160  
76.906  
71.296

34.305  
34.266  
30.011  
24.860  
23.649  
21.948

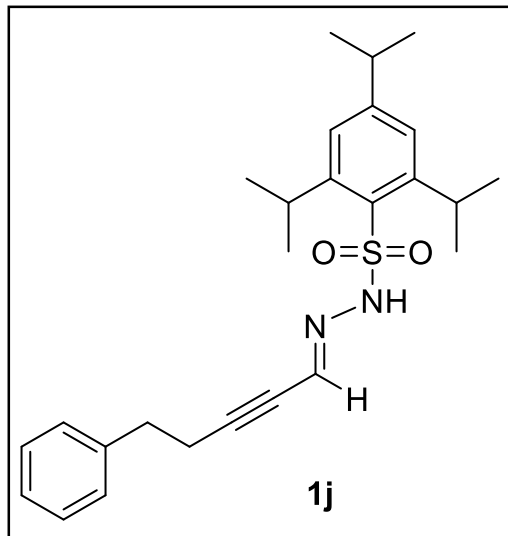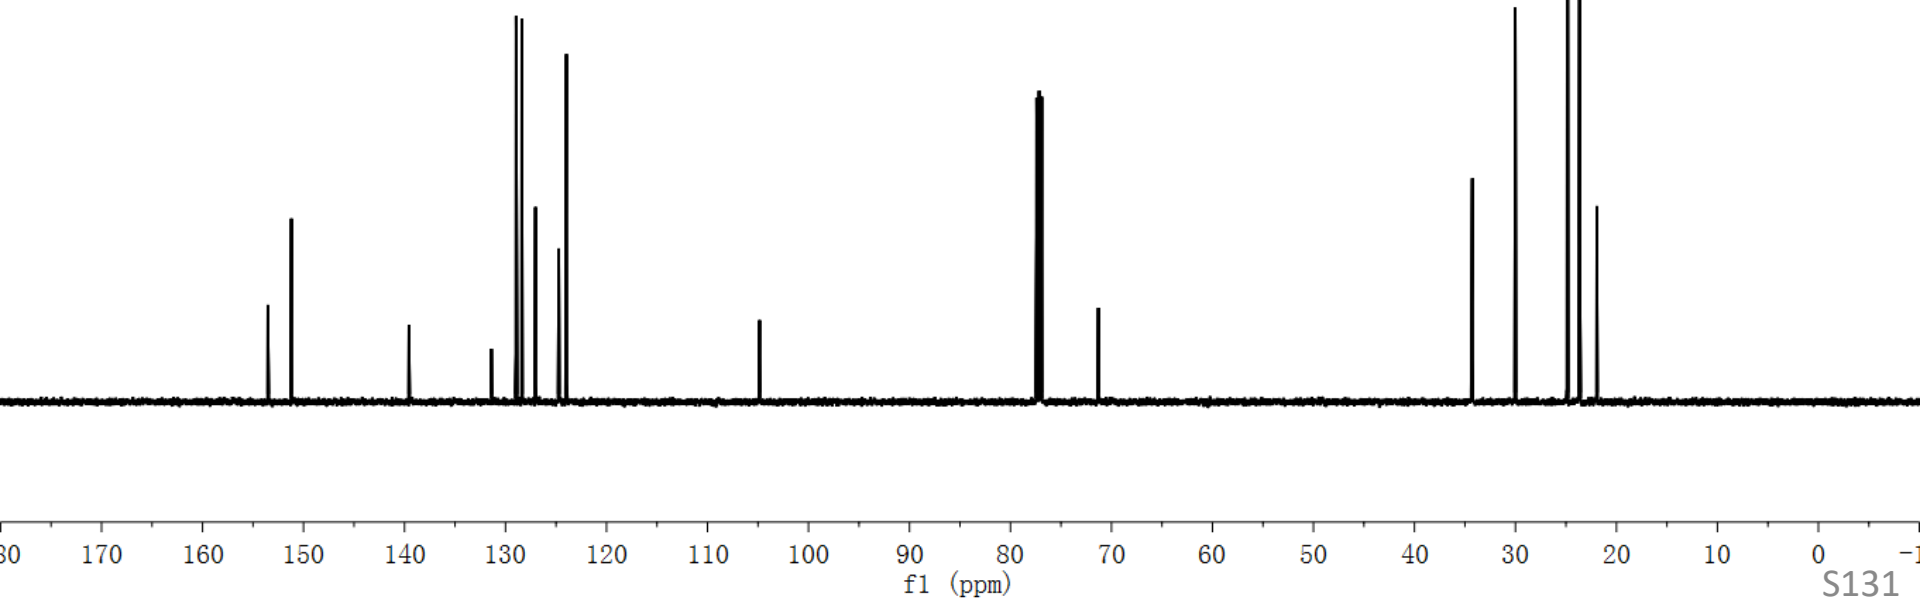

$^1\text{H}$  NMR of **1k**, 600 MHz,  $\text{CDCl}_3$

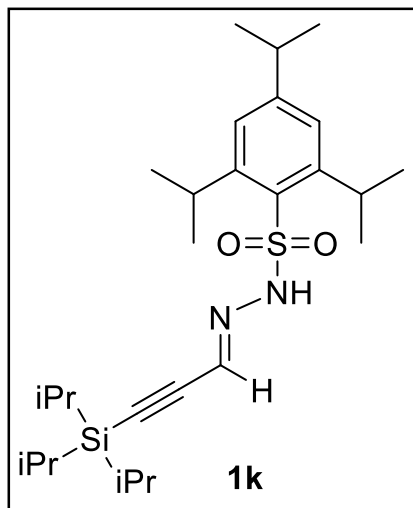

8.724

7.175

6.602

4.190

4.177

4.163

4.150

4.136

2.943

2.929

2.915

2.901

2.887

2.874

2.860

1.269

1.258

1.256

1.245

1.145

1.135

1.120

1.110

1.105

1.099

1.00

2.03

0.89

2.04

1.00

18.62

21.28

10.5

9.5

8.5

7.5

6.5

5.5

4.5

3.5

2.5

1.5

0.5

0.0

f1 (ppm)

S132

$^{13}\text{C}$  NMR of **1k**, 151 MHz,  $\text{CDCl}_3$

~153.682  
~151.321

—131.407

~124.035  
~123.937

—108.689

—94.383

~77.372  
~77.160  
~76.948

~34.346  
~30.193  
~24.987  
~23.672  
~18.684

—11.126

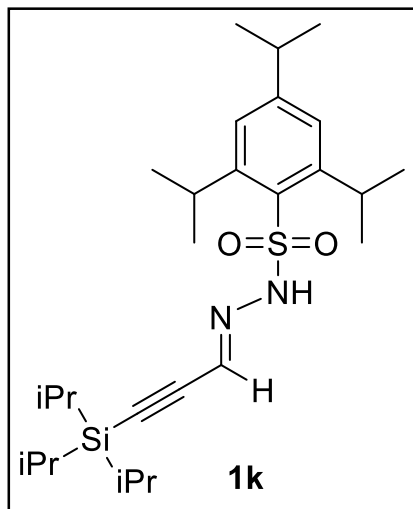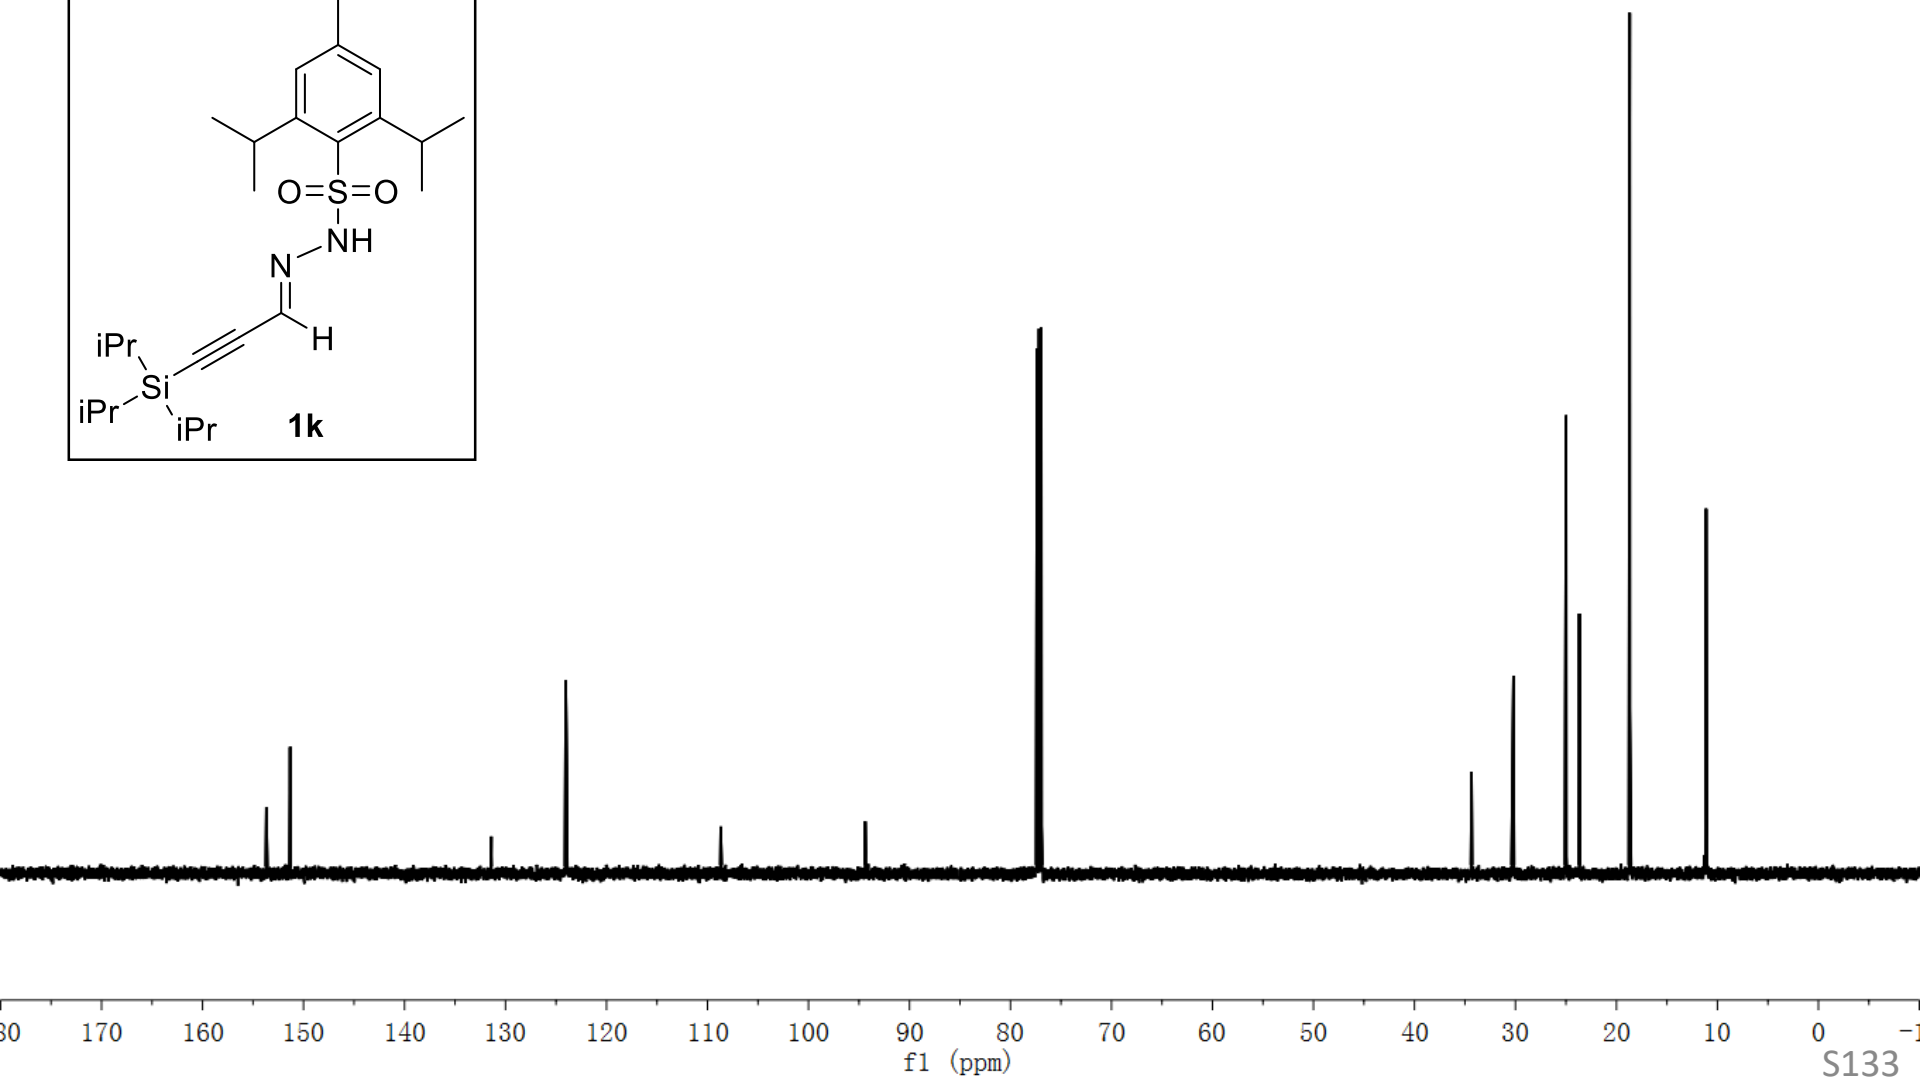

# $^1\text{H}$ NMR of **3a**, 500 MHz, $\text{CDCl}_3$

7.433  
7.427  
7.423  
7.417  
7.413  
7.345  
7.336  
7.319  
7.304  
7.302  
7.296  
7.290  
7.287  
7.260  
7.229  
7.214  
7.199  
7.148  
7.146  
7.132

2.402  
2.393  
2.390  
2.385  
2.381  
2.375  
2.373  
2.363

1.720  
1.461  
1.451  
1.443  
1.440  
1.434  
1.422  
1.383  
1.374  
1.371  
1.366  
1.354

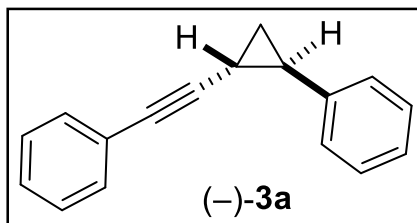

● Minor diastereomer

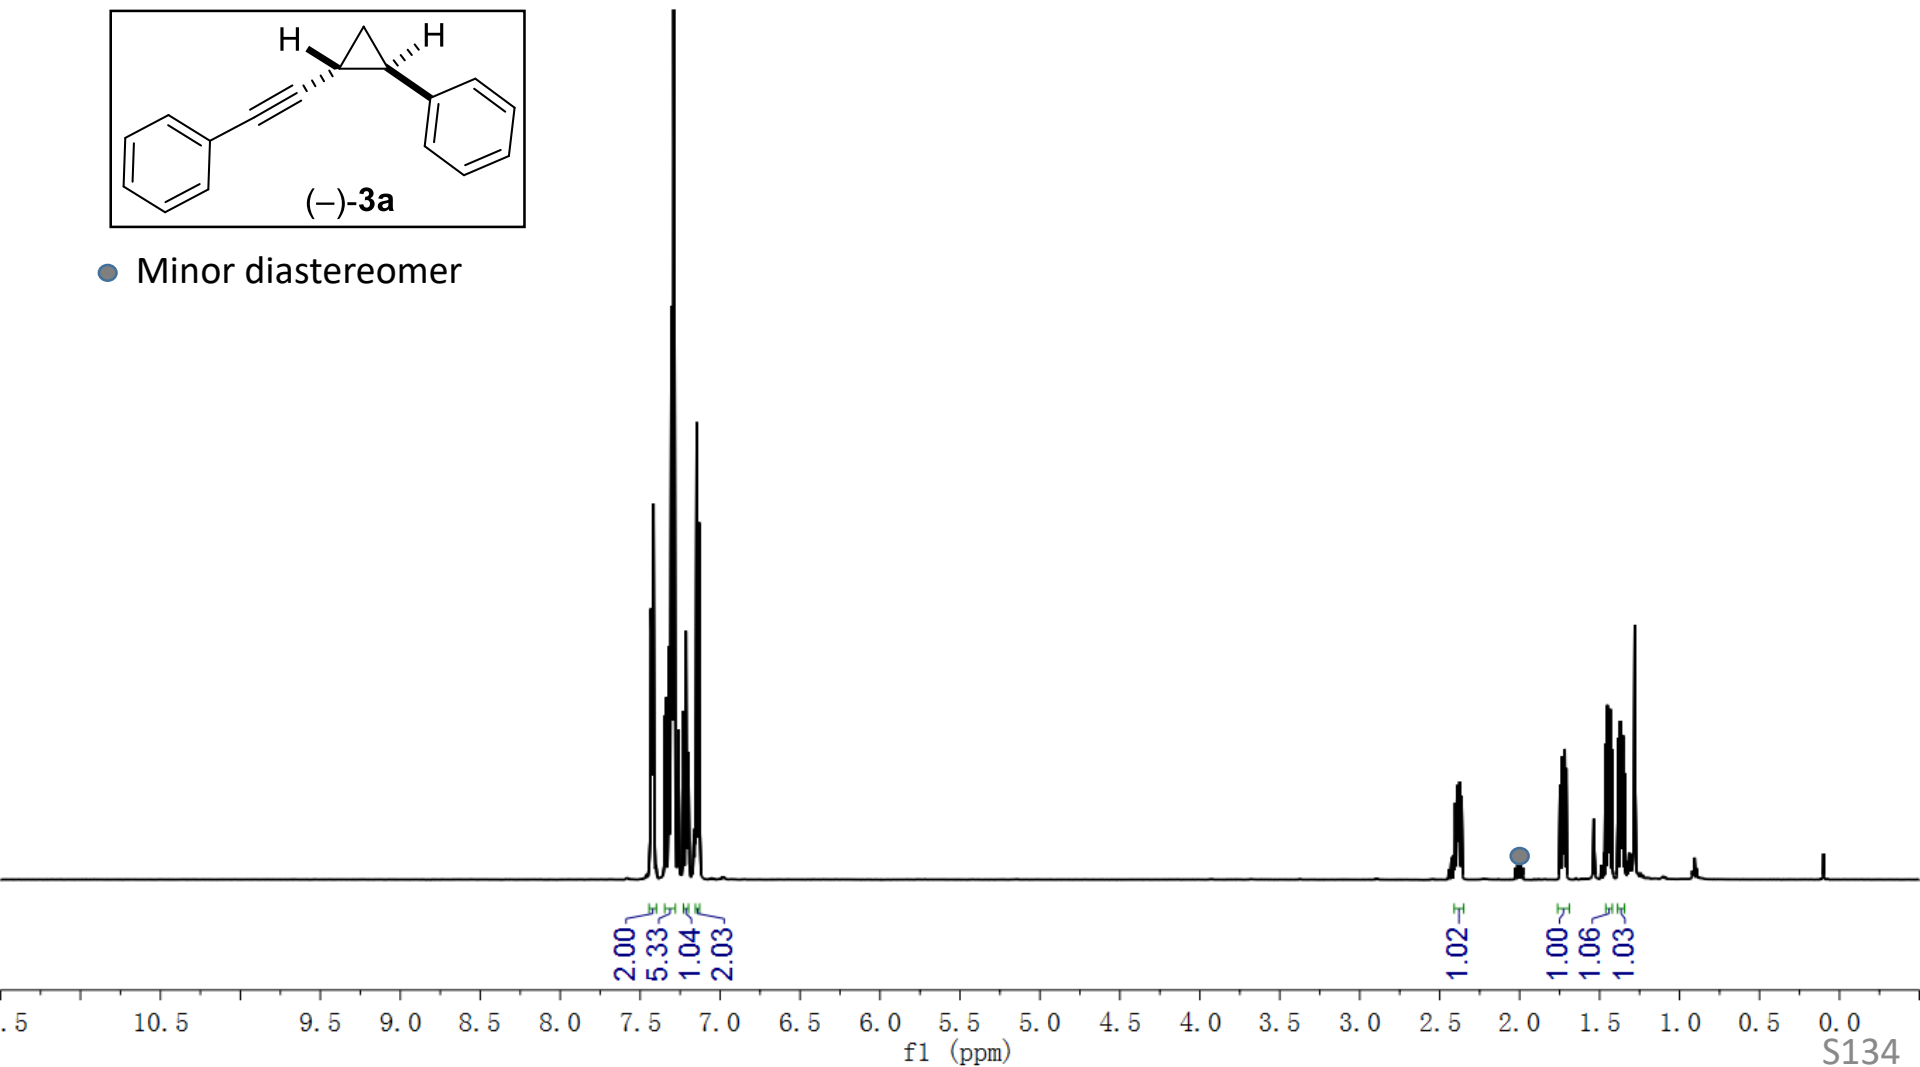

$^{13}\text{C}$  NMR of **3a**, 126 MHz,  $\text{CDCl}_3$

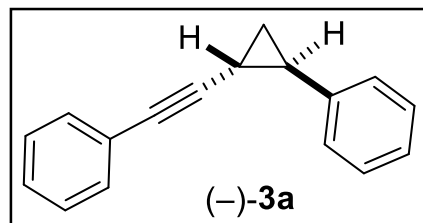

● Minor diastereomer

140.888  
131.760  
128.575  
128.346  
127.751  
126.383  
126.121  
123.856

92.052

77.414  
77.195  
77.160  
76.906

26.742

18.177

12.222

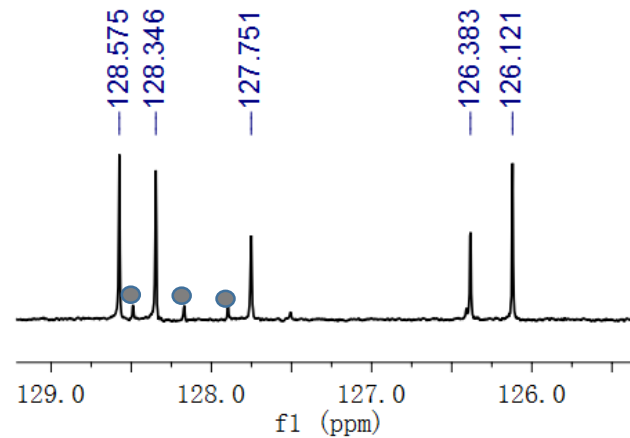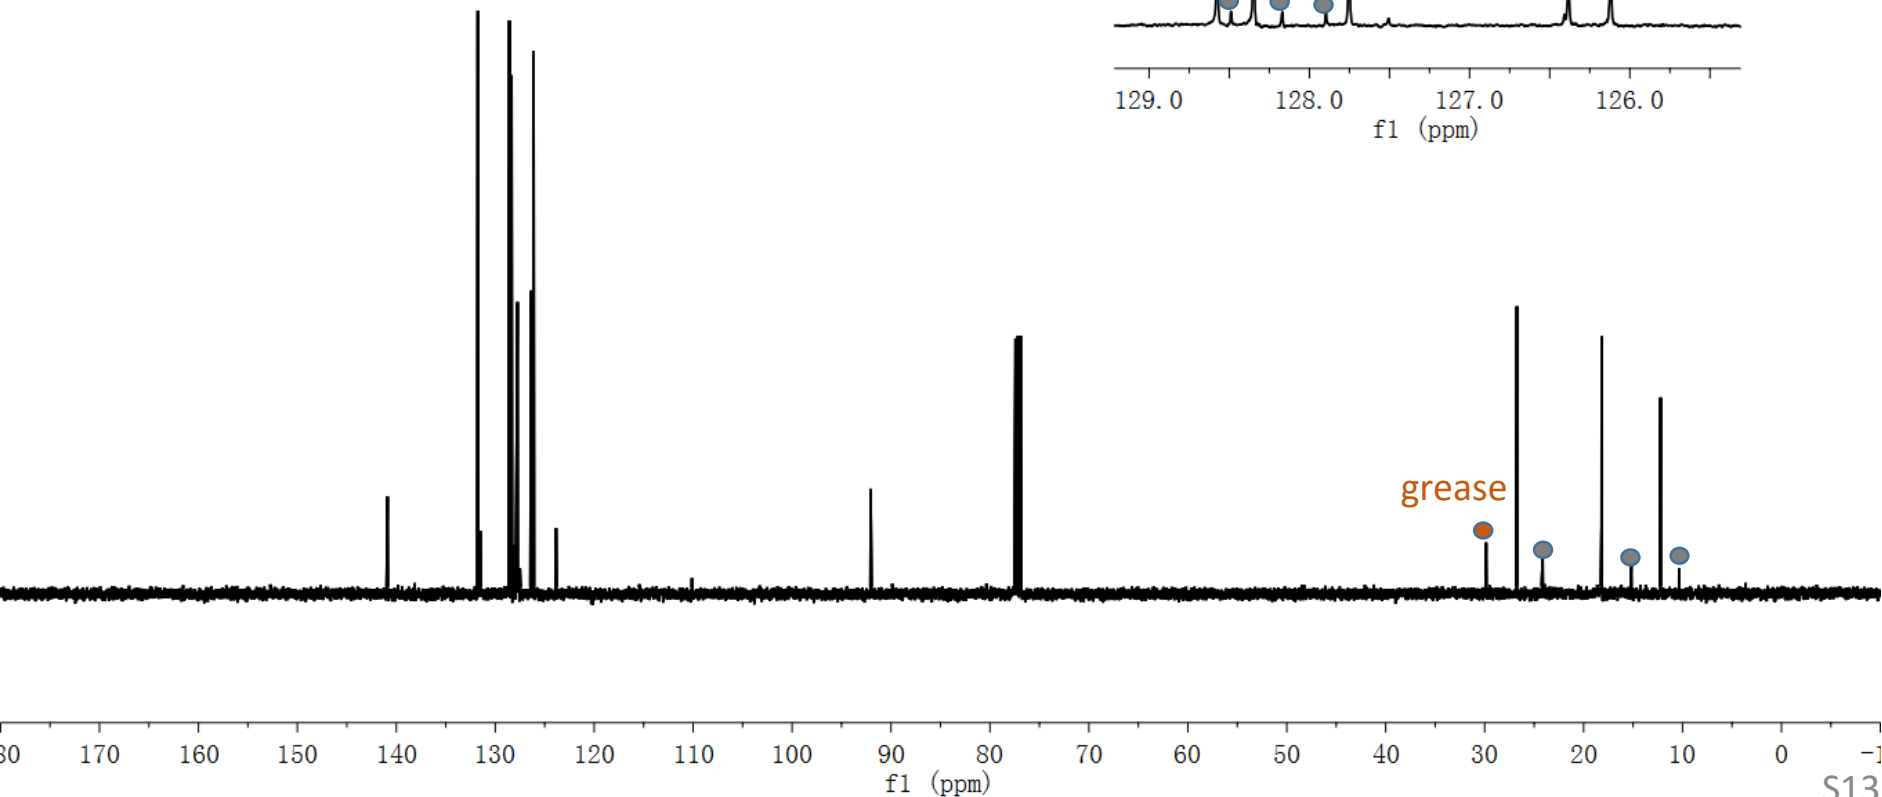

Data File : JOK-0070-1C-0%-0.8ML-i-sopropano l-solvent004.1.cd  
 Sample Name : JOK-0070-1C-0%-0.8ML-i-sopropano l-solvent004  
 Sample ID : JOK-0070-1C-0%-0.8ML-i-sopropano  
 Method File : JK-0%-0.8ml.lcm

Chromatogram

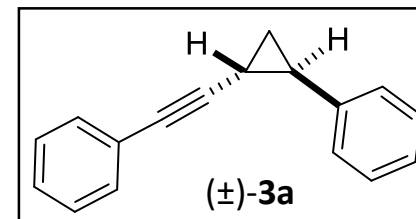

AU

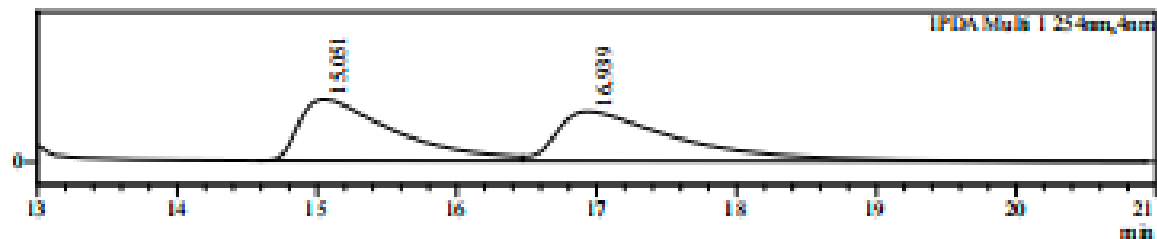

UV Spectrum

Retention time = 15.051

mAU

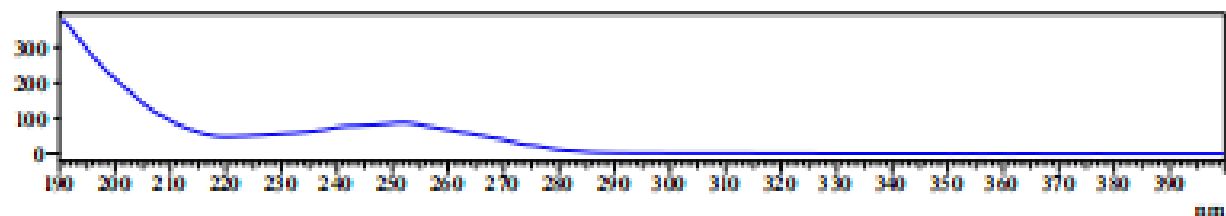

UV Spectrum

Retention time = 16.939

mAU

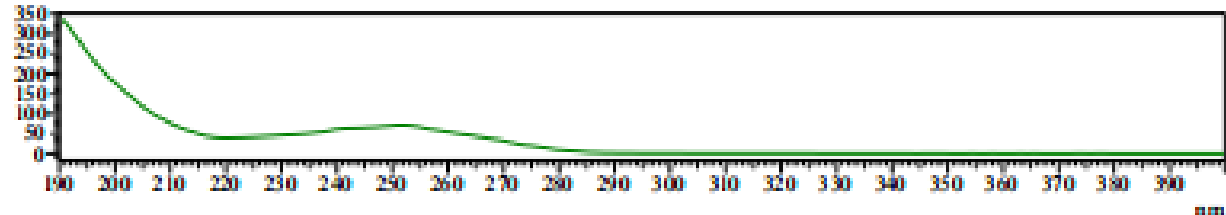

Peak Table

PDA Ch1 254nm

| Peak# | Ret. Time | Area    | Area%   |
|-------|-----------|---------|---------|
| 1     | 15.051    | 3817557 | 49.333  |
| 2     | 16.939    | 3920860 | 50.667  |
| Total |           | 7738417 | 100.000 |



Data File : JOK-0068-4C-0%-0.8ML-i-sopropano-l-solvent005.lcd  
 Sample Name : JOK-0068-4C-0%-0.8ML-i-sopropano-l-solvent005  
 Sample ID : JOK-0068-4C-0%-0.8ML-i-sopropano  
 Method File : JK-0%-0.8ml.lcm

Chromatogram

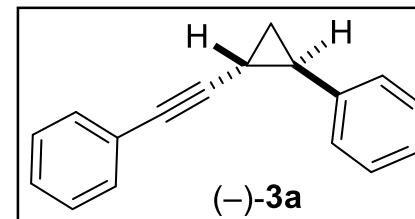

mAU

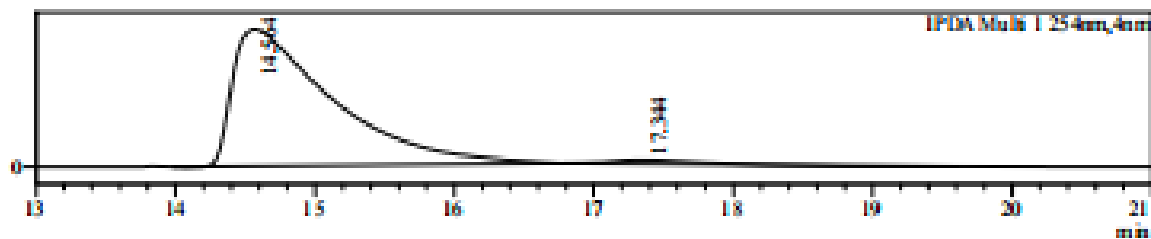

UV Spectrum

Retention time = 14.564

mAU

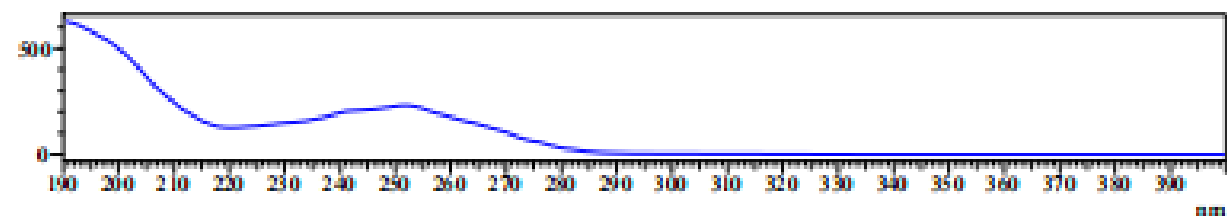

UV Spectrum

Retention time = 17.344

mAU

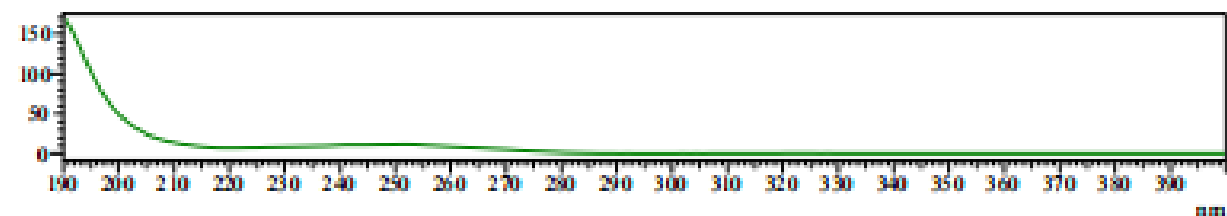

Peak Table

PDA Ch1 254nm

| Peak# | Ret. Time | Area     | Area%   |
|-------|-----------|----------|---------|
| 1     | 14.564    | 10795024 | 97.917  |
| 2     | 17.344    | 229635   | 2.083   |
| Total |           | 11024660 | 100.000 |

# $^1\text{H}$ NMR of **3b**, 500 MHz, $\text{CDCl}_3$

7.335  
7.327  
7.325  
7.321  
7.318  
7.312  
7.309  
7.305  
7.301  
7.298  
7.285  
7.282  
7.260  
7.260  
7.224  
7.221  
7.219  
7.207  
7.142  
7.139  
7.136  
7.125  
7.124  
7.111  
7.110  
7.094  
7.093  
2.376  
2.373  
2.368  
2.364  
2.359  
2.355  
2.347  
1.734  
1.725  
1.723  
1.716  
1.713  
1.707  
1.705  
1.696  
1.446  
1.436  
1.434  
1.428  
1.425  
1.418  
1.417  
1.407  
1.366  
1.356  
1.353  
1.348  
1.344  
1.339  
1.336  
1.327

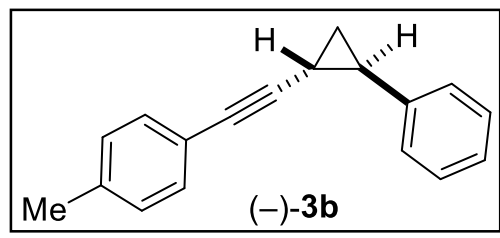

● Minor diastereomer

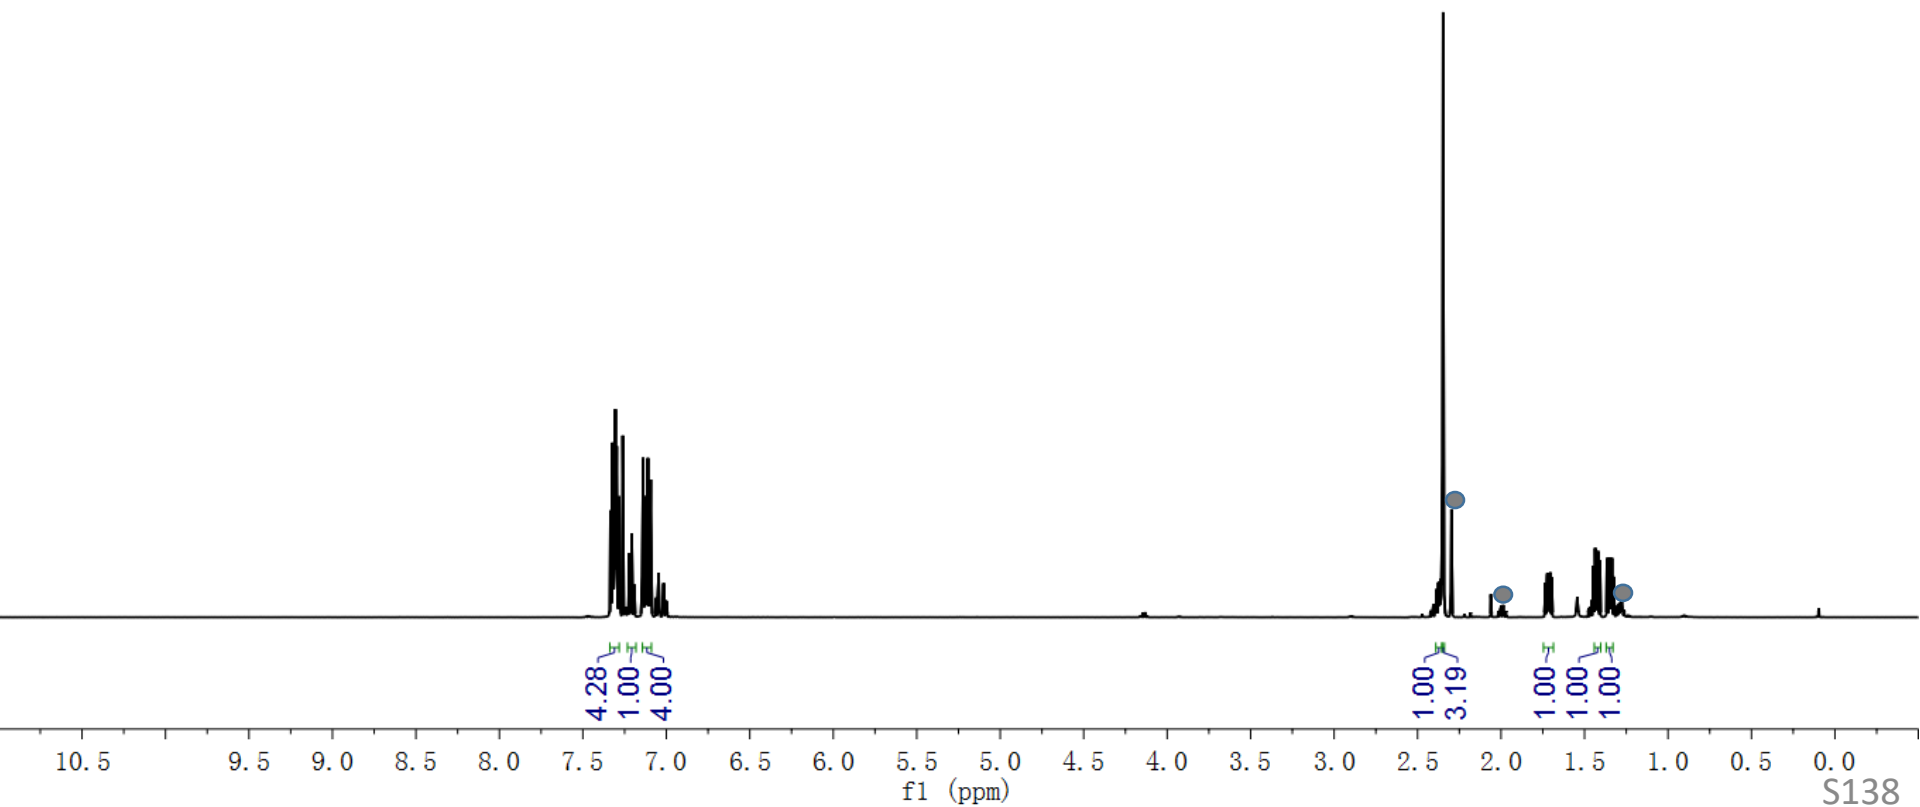

$^{13}\text{C}$  NMR of **3b**, 126 MHz,  $\text{CDCl}_3$

140.982  
137.755  
131.643  
129.108  
128.555  
126.336  
126.112  
120.749

91.218

77.414  
77.241  
77.160  
76.906

26.699  
21.557  
18.174  
12.270

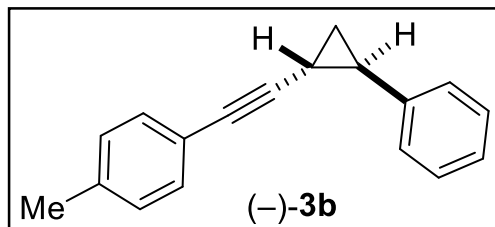

● Minor diastereomer

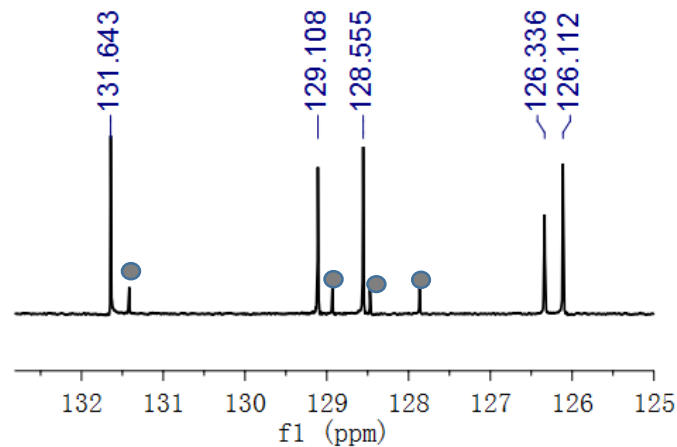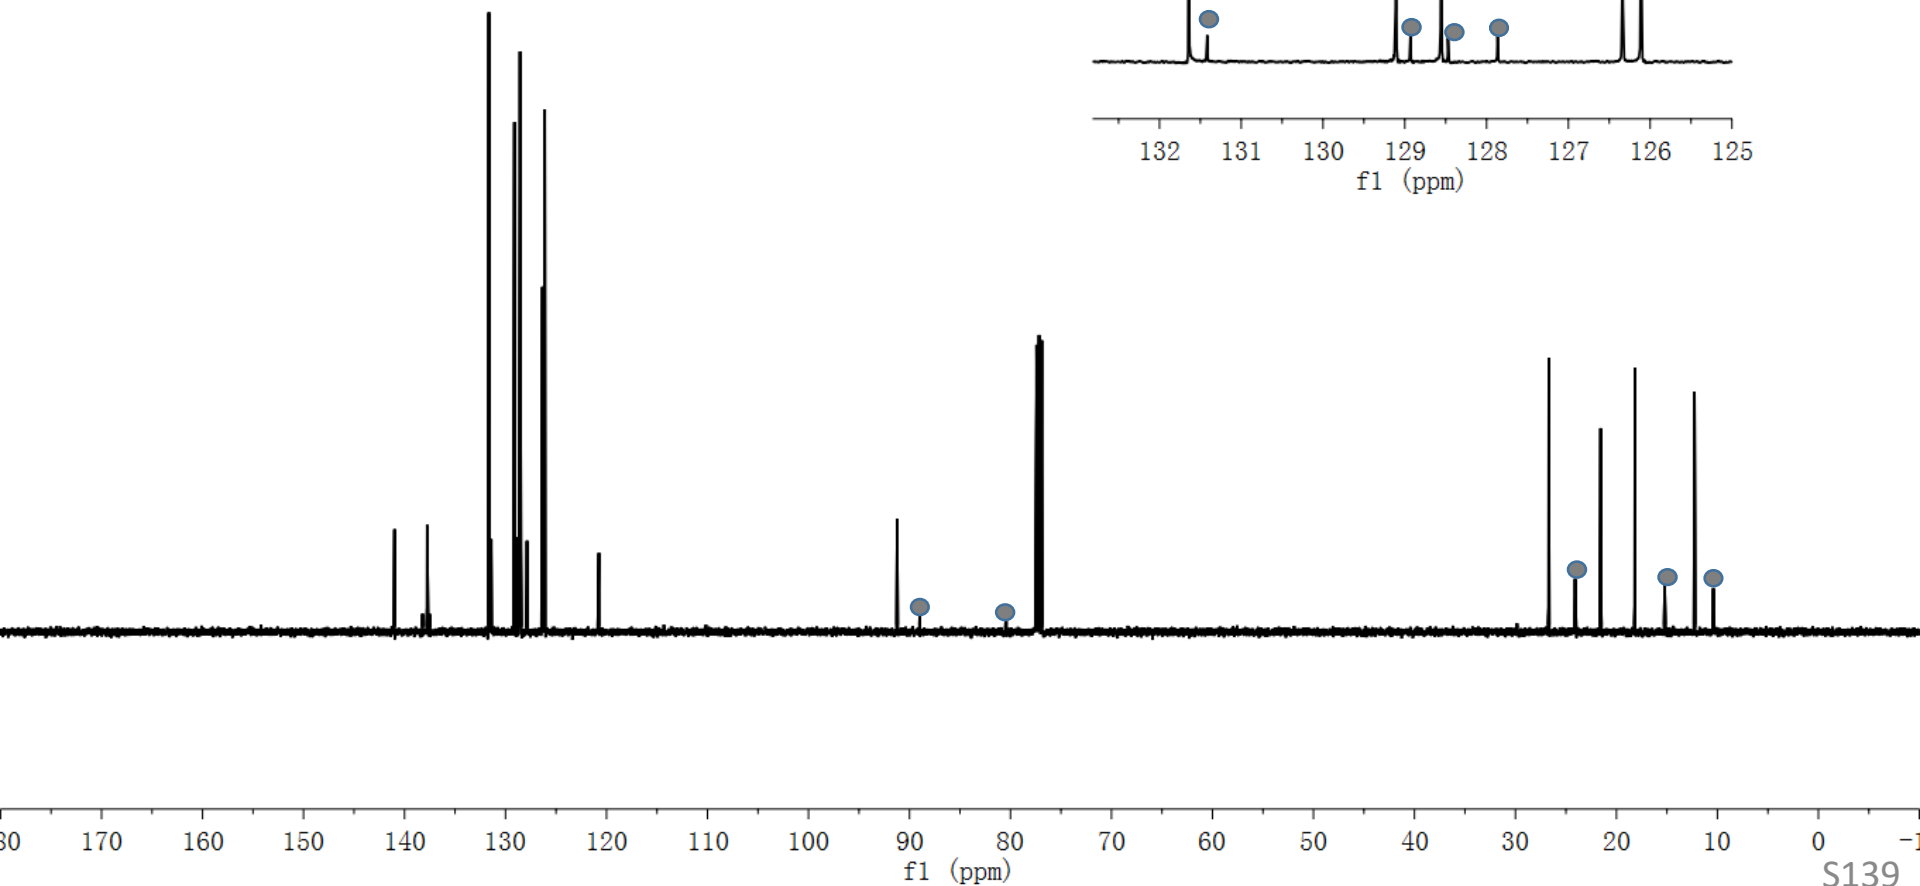

Data File : J0K-0097-IC-0%-0.8ML-isopropanol-solvent003.lcd  
 Sample Name : J0K-0097-IC-0%-0.8ML-isopropanol-solvent003  
 Sample ID : J0K-0097-IC-0%-0.8ML-iso propano  
 Method File : JK-0%-0.8ml.lcm

Chromatogram

mAU

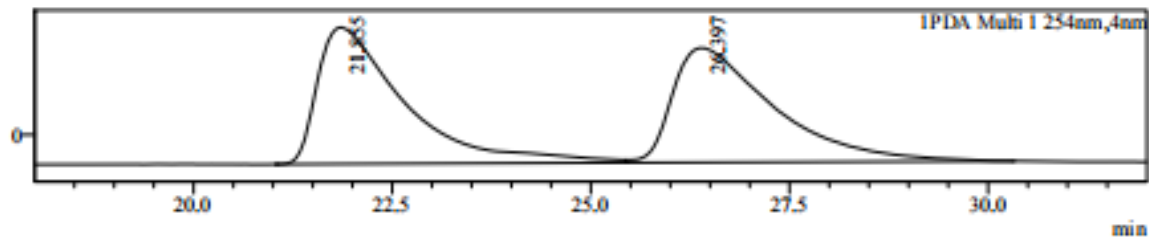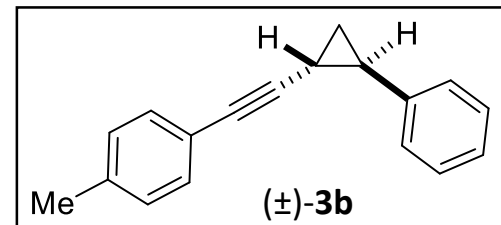

UV Spectrum

Retention time = 21.855

mAU

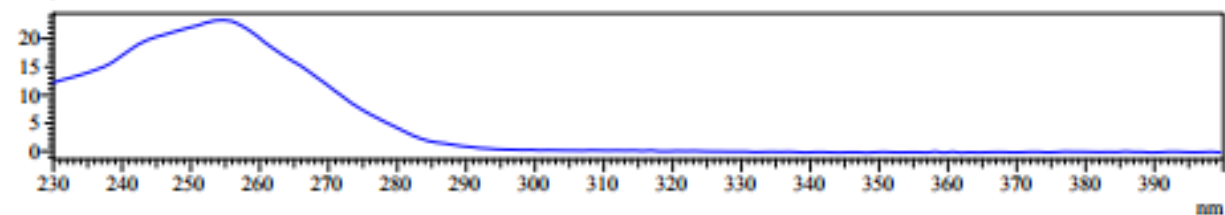

1

Retention time = 26.397

mAU

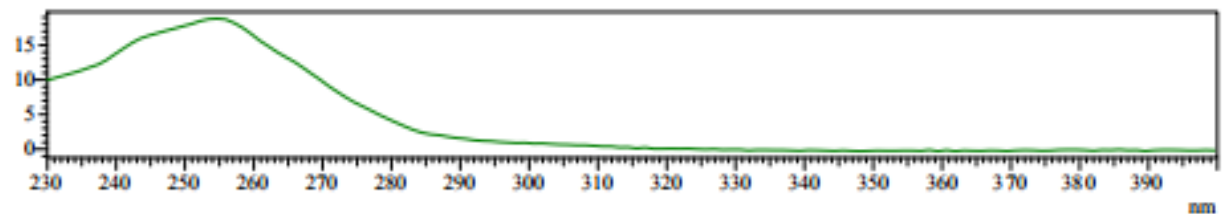

Peak Table

PDA Ch1 254nm

| Peak# | Ret. Time | Area    | Area%   |
|-------|-----------|---------|---------|
| 1     | 21.855    | 2215993 | 50.737  |
| 2     | 26.397    | 2151617 | 49.263  |
| Total |           | 4367610 | 100.000 |

Data File : J0K-0115-1C-0%-0.8ML-isopropanol-solvent004.lcd  
 Sample Name : J0K-0115-1C-0%-0.8ML-isopropanol-solvent004  
 Sample ID : J0K-0115-1C-0%-0.8ML-isopropano  
 Method File : JK-0%-0.8ml.lcm

Chromatogram

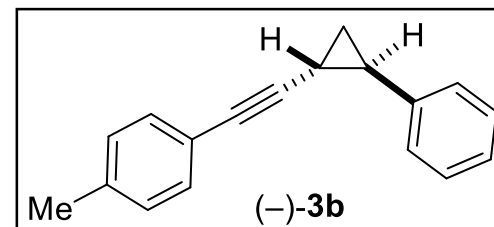

mAU

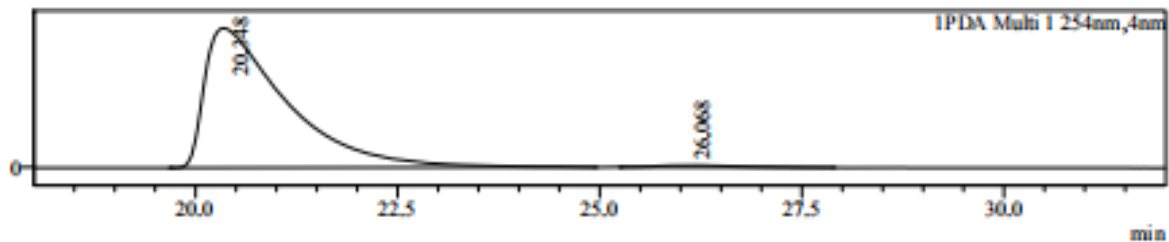

UV Spectrum  
 Retention time = 20.348

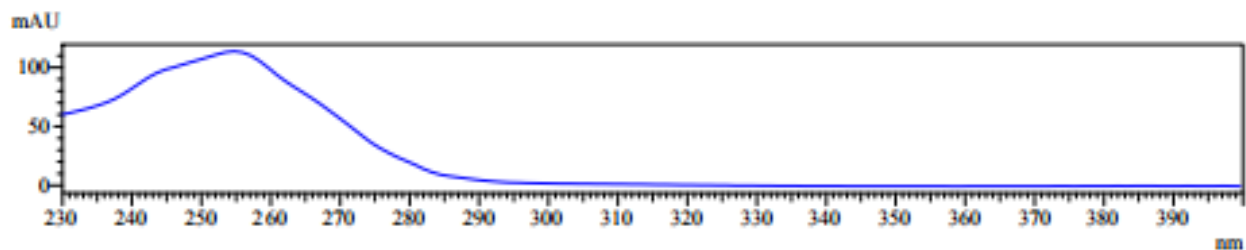

UV Spectrum  
 Retention time = 26.068

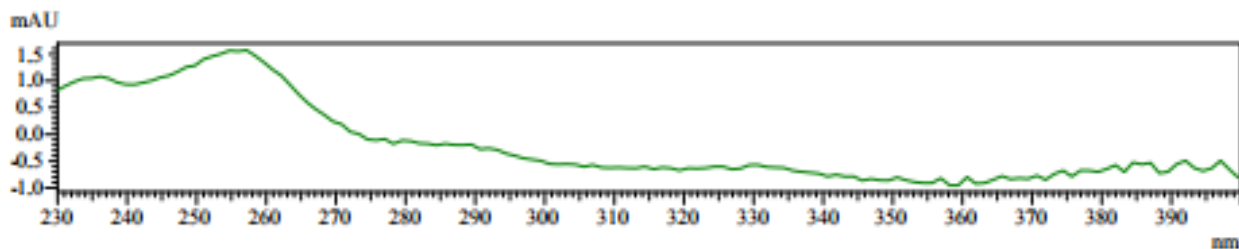

Peak Table

PDA Ch1 254nm

| Peak# | Ret. Time | Area    | Area%   |
|-------|-----------|---------|---------|
| 1     | 20.348    | 7849014 | 98.625  |
| 2     | 26.068    | 109463  | 1.375   |
| Total |           | 7958477 | 100.000 |

# $^1\text{H}$ NMR of **3c**, 600 MHz, $\text{CDCl}_3$

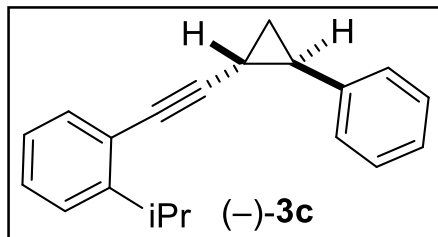

7.390  
7.377  
7.314  
7.301  
7.289  
7.260  
7.252  
7.245  
7.221  
7.209  
7.197  
7.144  
7.132  
7.121  
7.114  
7.108  
7.101  
7.094

3.469  
3.458  
3.447  
3.435  
3.424  
3.412  
3.401

2.373  
2.366  
2.359

1.770  
1.764  
1.756

1.450  
1.442  
1.435  
1.427  
1.419  
1.385  
1.377  
1.370  
1.362  
1.274  
1.262

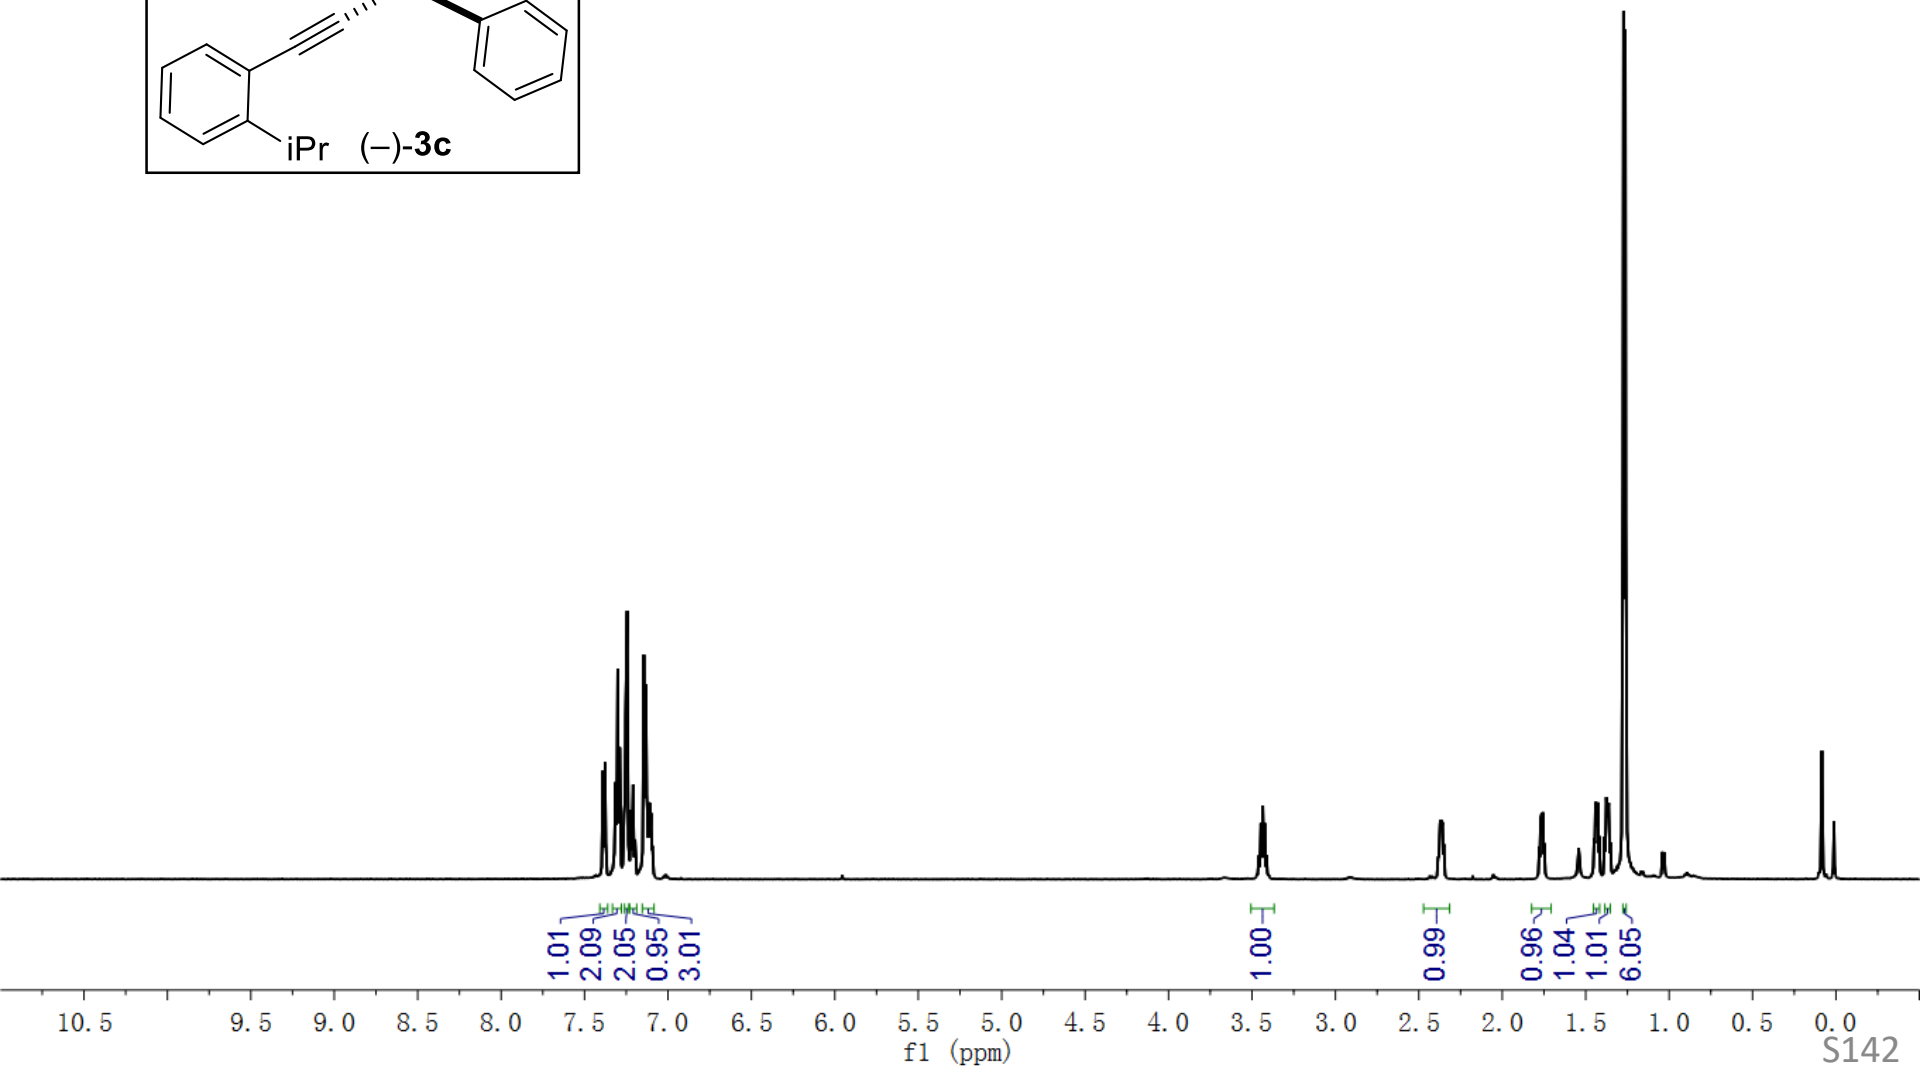

$^{13}\text{C}$  NMR of **3c**, 151 MHz,  $\text{CDCl}_3$



— 150.528  
— 141.001  
— 132.465  
— 128.594  
— 128.086  
— 126.372  
— 126.084  
— 125.541  
— 124.940  
— 122.553

— 95.651

77.372  
77.160  
76.948  
75.795

31.614  
26.868  
23.198  
23.185  
18.398  
12.500

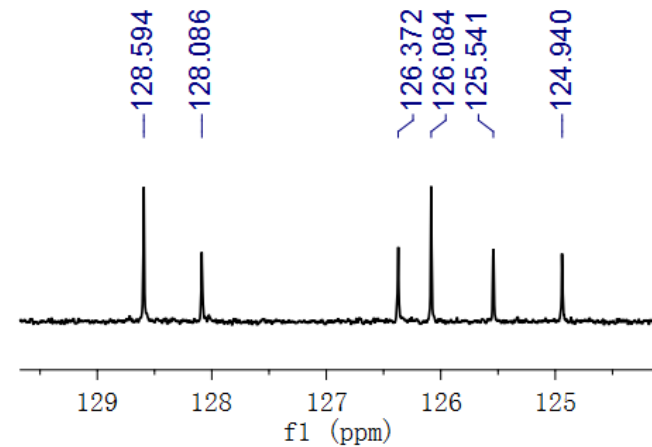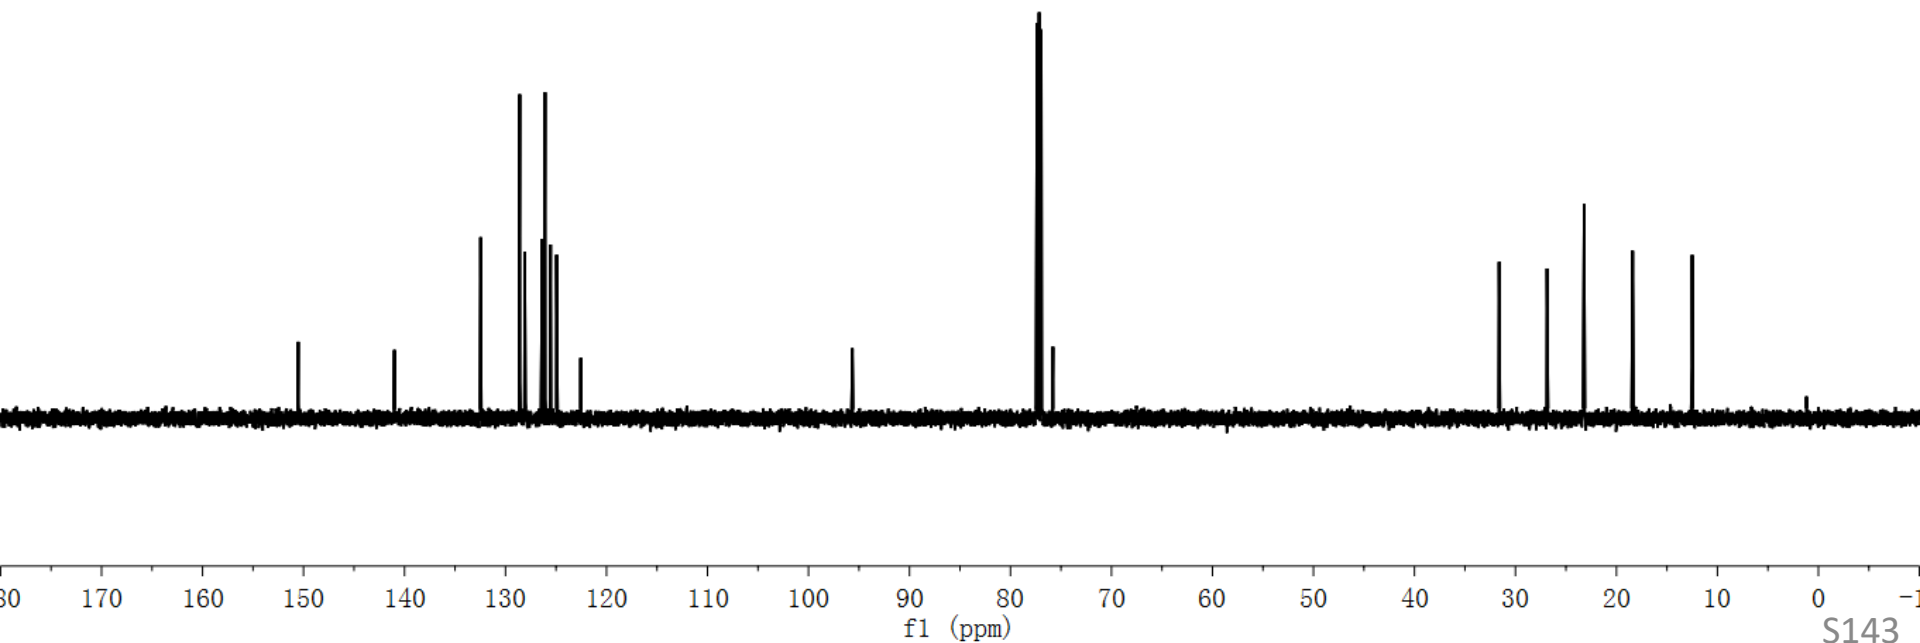

Data File : J0K-0241-12-1C-0%-0.5ML-isopropanol-solvent006-modified.lcd  
 Sample Name : J0K-0241-12-1C-0%-0.5ML-isopropanol-solvent006  
 Sample ID : J0K-0241-12-1C-0%-0.5ML-isoprop  
 Method File : J0K-0%-0.5ml.km

Chromatogram

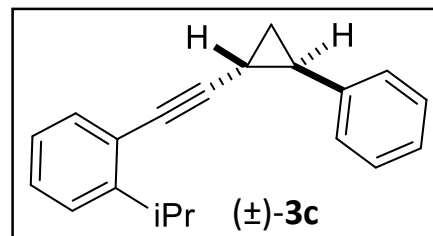

AU

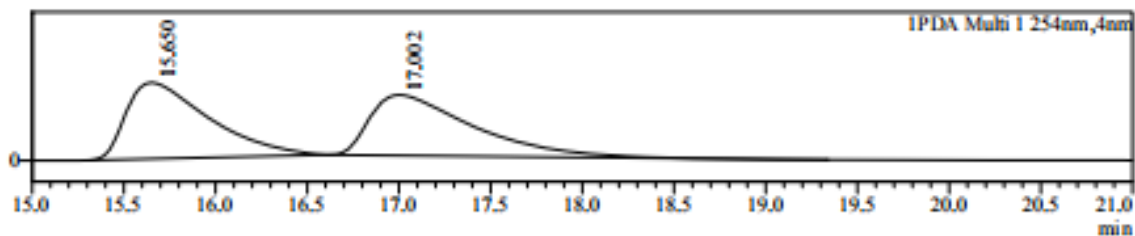

UV Spectrum

Retention time = 15.650

mAU

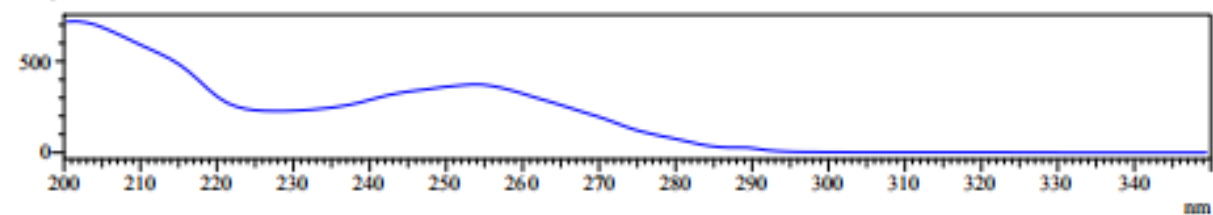

1

Retention time = 17.002

mAU

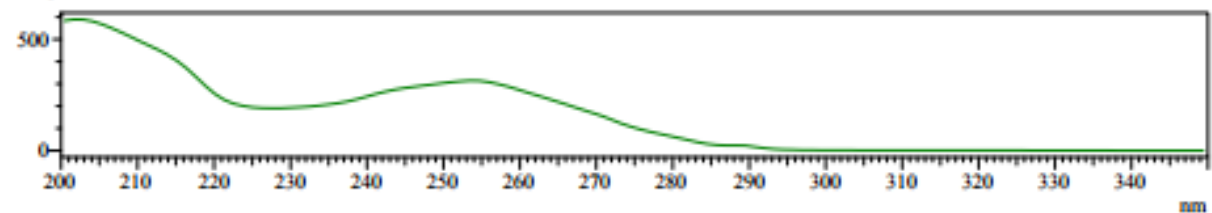

Peak Table

PDA Ch1 254nm

| Peak# | Ret. Time | Area     | Area%   |
|-------|-----------|----------|---------|
| 1     | 15.650    | 11294352 | 50.388  |
| 2     | 17.002    | 11120560 | 49.612  |
| Total |           | 22414912 | 100.000 |



Data File : J0K-0242-13-IC-0%-0.5ML-isopropanol-solvent005-modified.lcd  
 Sample Name : J0K-0242-13-IC-0%-0.5ML-isopropanol-solvent005  
 Sample ID : J0K-0242-13-IC-0%-0.5ML-isoprop  
 Method File : J0K-0%-0.5ml.lcm

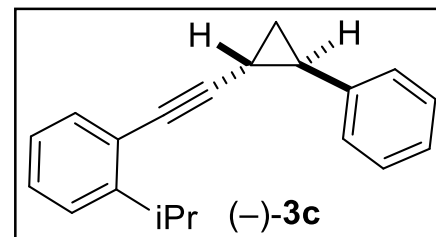

Chromatogram

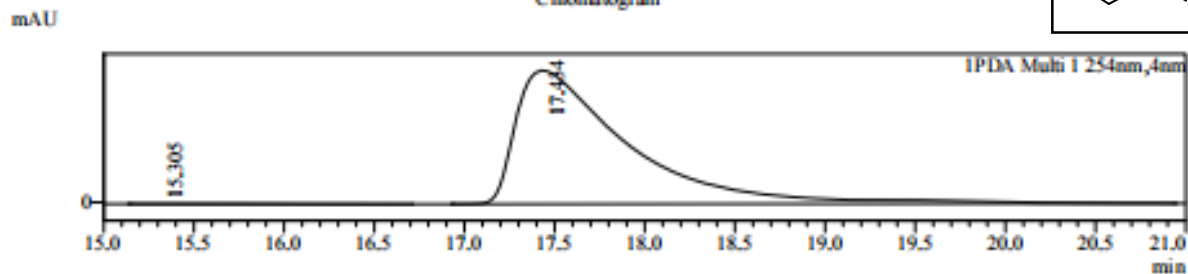

UV Spectrum  
Retention time = 15.305

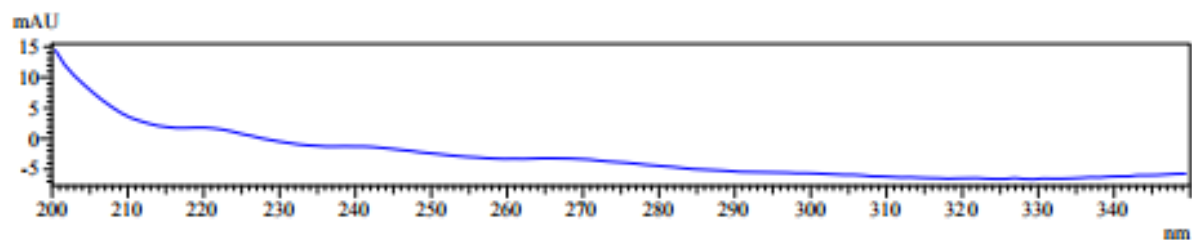

UV Spectrum  
Retention time = 17.434

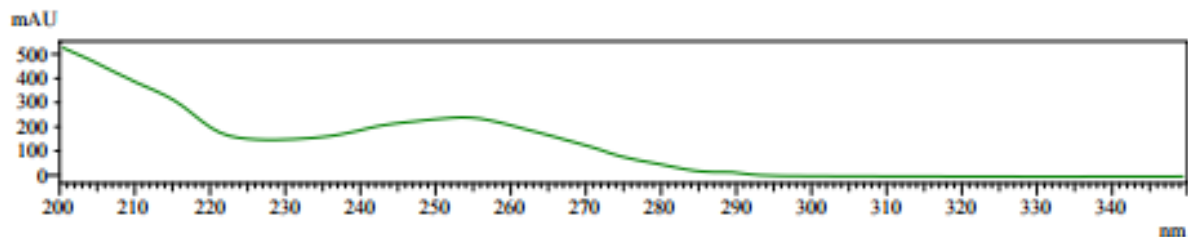

Peak Table

| Peak# | Ret. Time | Area     | Area%   |
|-------|-----------|----------|---------|
| 1     | 15.305    | 21830    | 0.213   |
| 2     | 17.434    | 10222096 | 99.787  |
| Total |           | 10243926 | 100.000 |

# $^1\text{H}$ NMR of **3d**, 500 MHz, $\text{CDCl}_3$

7.327  
7.320  
7.300  
7.287  
7.275  
7.210  
7.199  
7.188  
7.176  
7.131  
7.118  
7.005  
6.993  
6.937  
6.842  
6.828  
6.764  
6.748  
6.732  
6.634

3.795  
3.726

2.408  
2.384  
2.368  
2.361  
2.352

1.720  
1.712  
1.705  
1.698  
1.690

1.449  
1.442  
1.434  
1.426  
1.419  
1.410  
1.366  
1.353  
1.342  
1.334

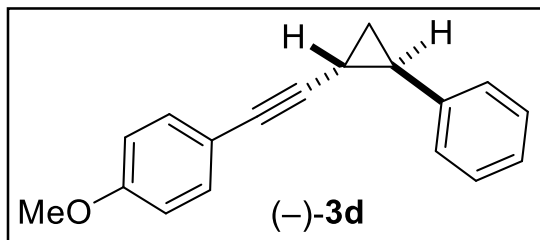

● Minor diastereomer

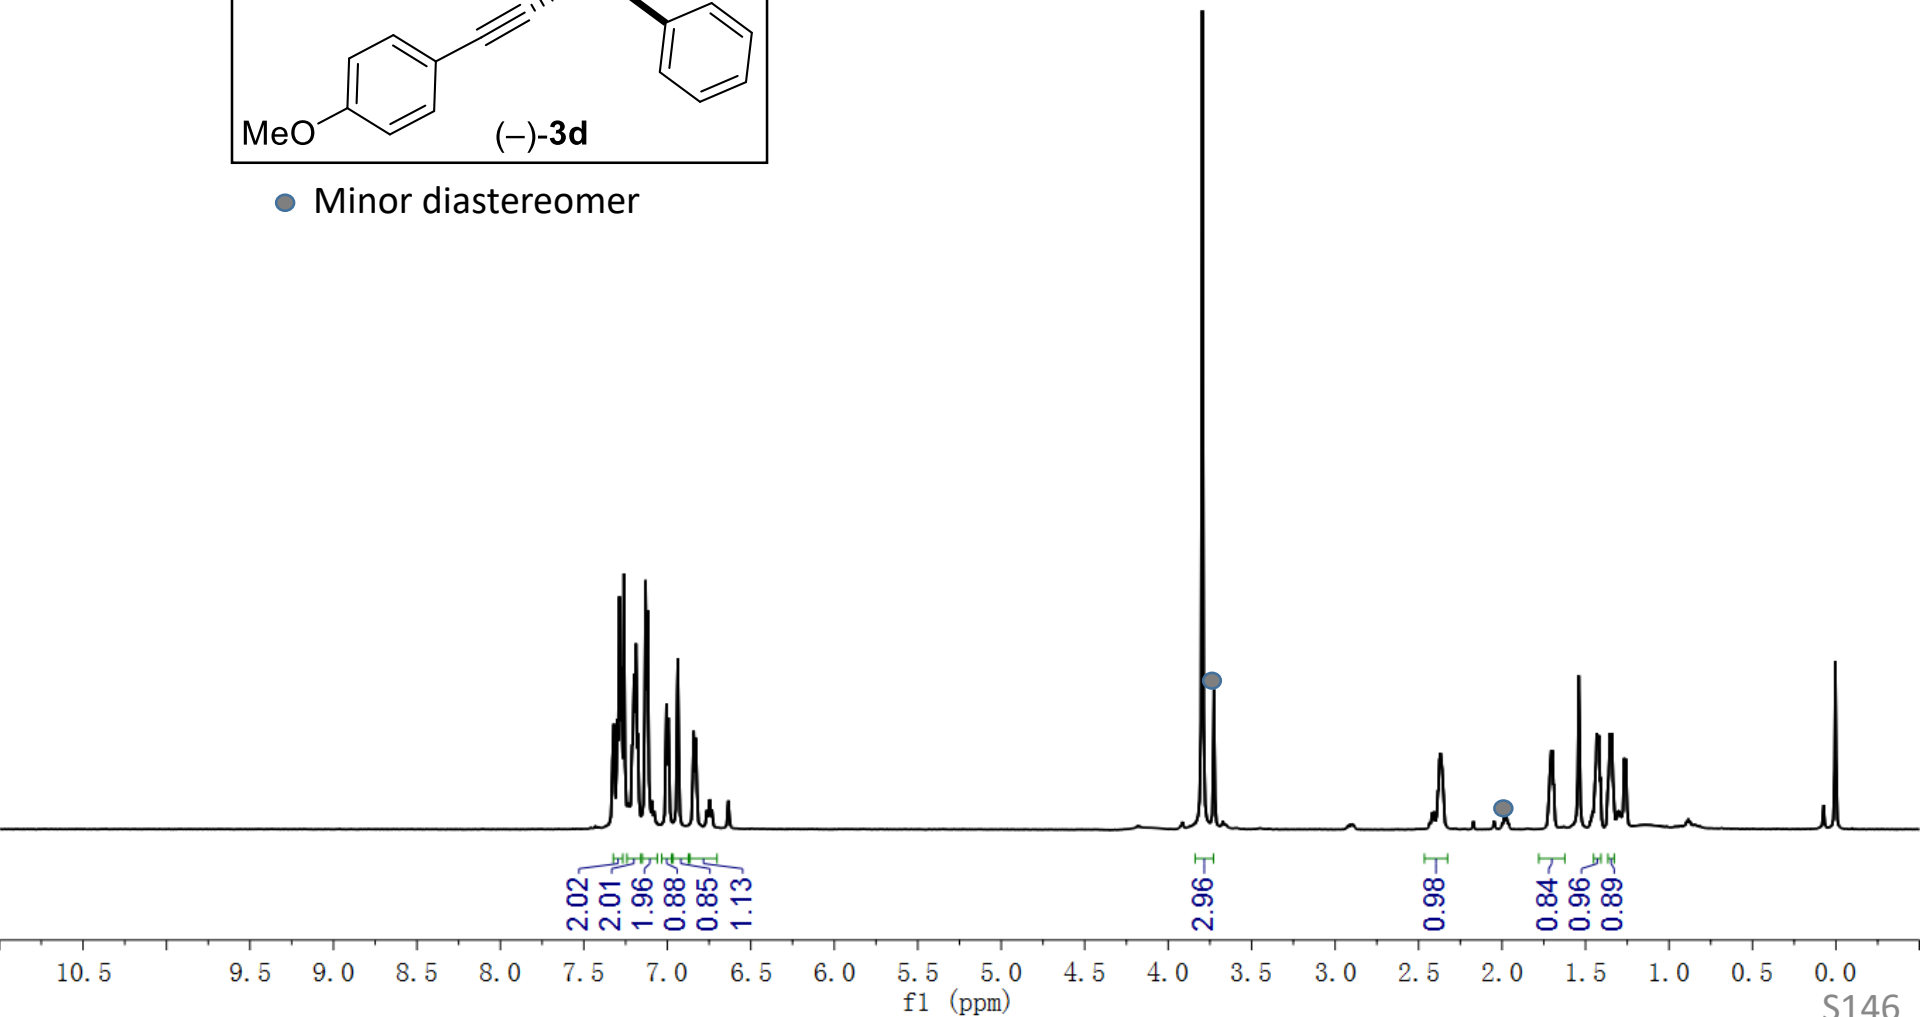

# $^{13}\text{C}$ NMR of **3d**, 126 MHz, $\text{CDCl}_3$

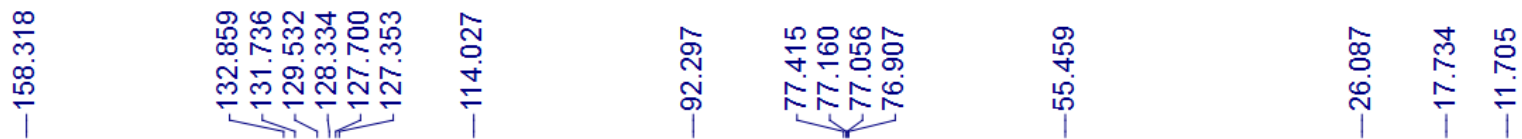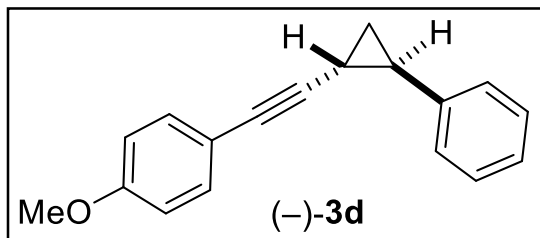

● Minor diastereomer

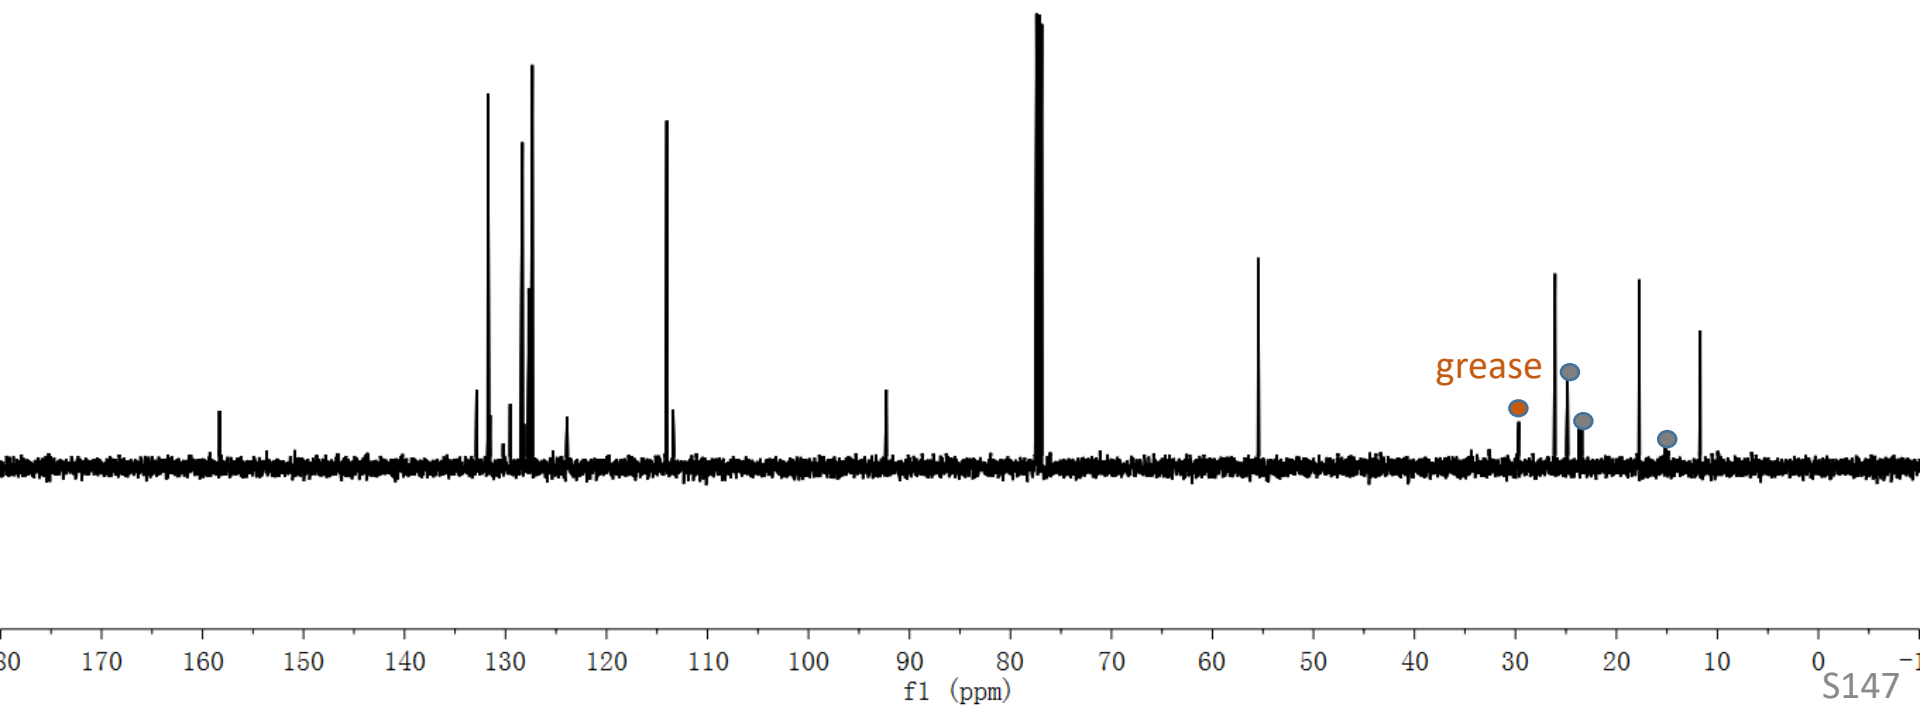

Data File : JOK-0608-ID-0.5%-0.8ML.lcd  
 Sample Name : JOK-0608-ID-0.5%-0.8ML  
 Sample ID : JOK-0608-ID-0.5%-0.8ML  
 Method File : JOK-0.5%-35min-0.8ml.lcm  
 Chromatogram

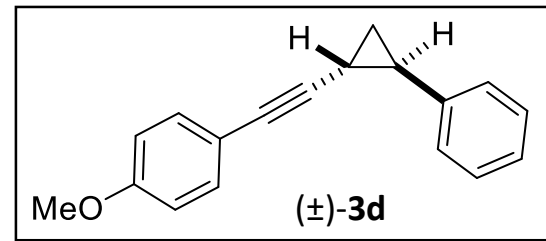

AU

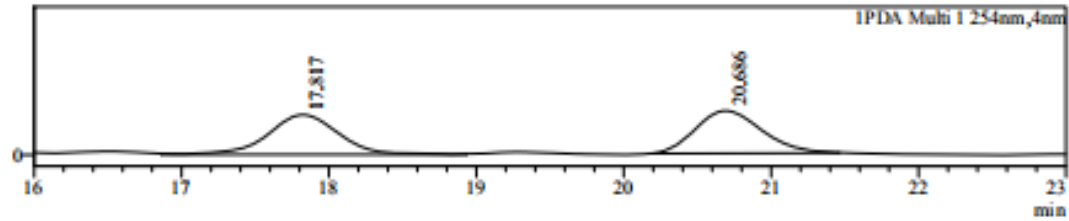

UV Spectrum

Retention time = 17.817

mAU

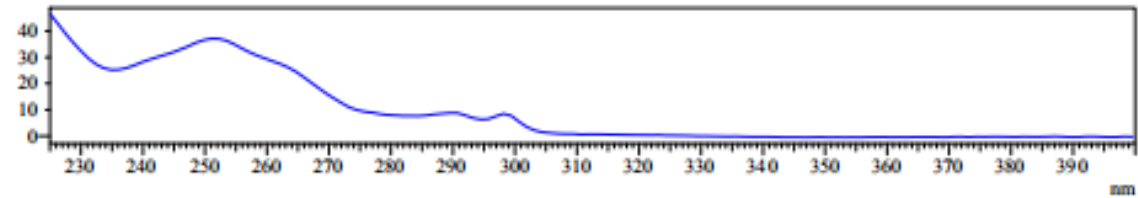

1

Retention time = 20.686

mAU

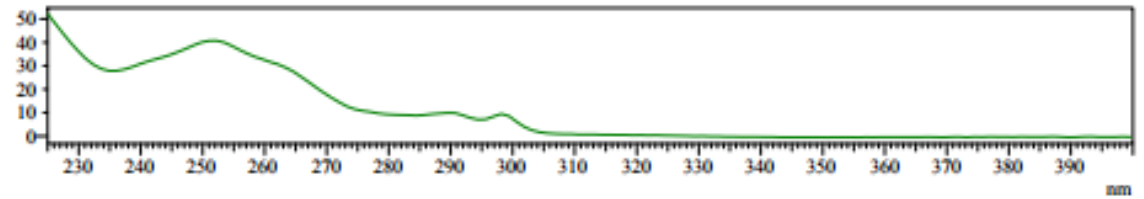

Peak Table

PDA Ch1 254nm

| Peak# | Ret. Time | Area    | Area%   |
|-------|-----------|---------|---------|
| 1     | 17.817    | 1175582 | 50.070  |
| 2     | 20.686    | 1172308 | 49.930  |
| Total |           | 2347890 | 100.000 |

Data File : JOK-0607-ID-3-0.5%-0.8ML.lcd  
 Sample Name : JOK-0607-ID-3-0.5%-0.8ML  
 Sample ID : JOK-0607-ID-3-0.5%-0.8ML  
 Method File : JOK-0.5%-35min-0.8ml.lcm  
 Chromatogram

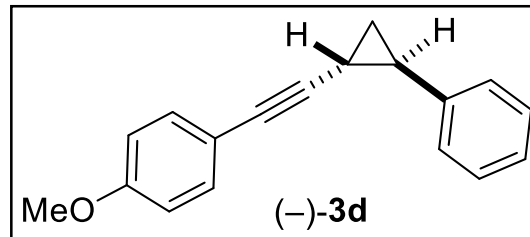

mAU

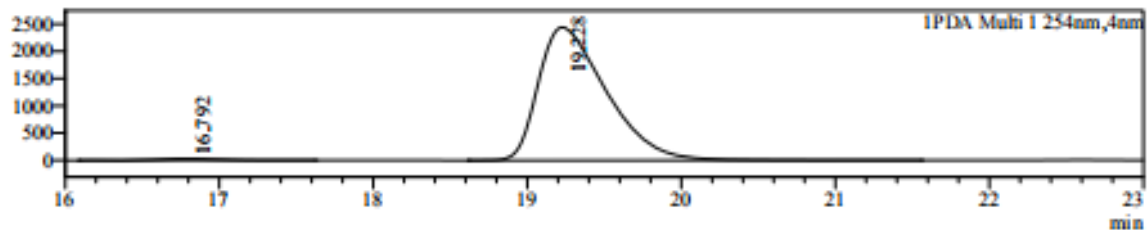

UV Spectrum  
 Retention time = 16.792

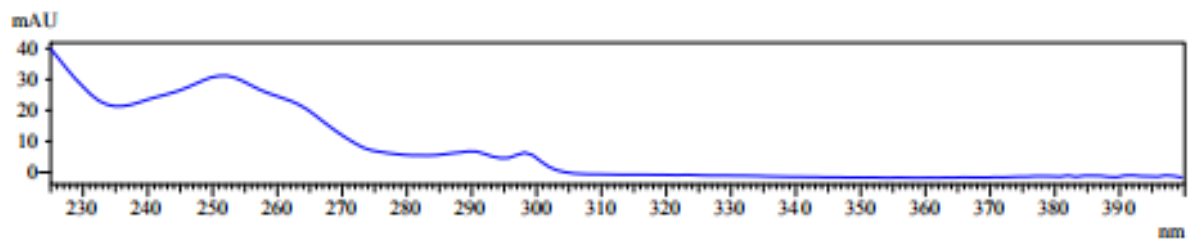

UV Spectrum  
 Retention time = 19.228

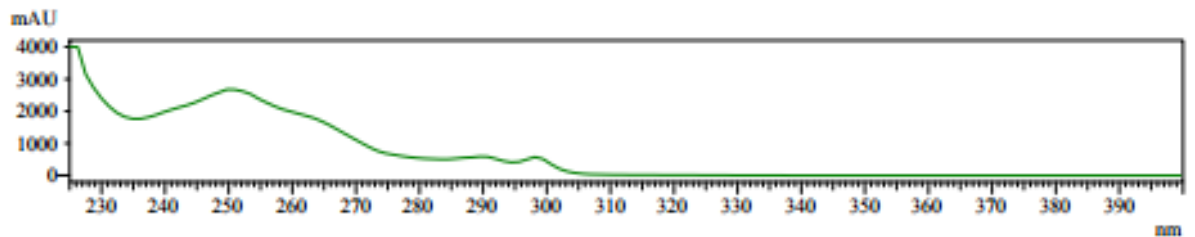

Peak Table

| PDA Ch1 254nm |           |          |         |
|---------------|-----------|----------|---------|
| Peak#         | Ret. Time | Area     | Area%   |
| 1             | 16.792    | 866540   | 1.151   |
| 2             | 19.228    | 74413811 | 98.849  |
| Total         |           | 75280351 | 100.000 |

# $^1\text{H}$ NMR of **3e**, 500 MHz, $\text{CDCl}_3$

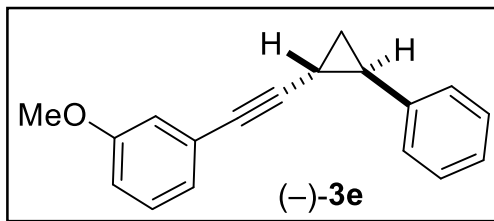

● Minor diastereomer

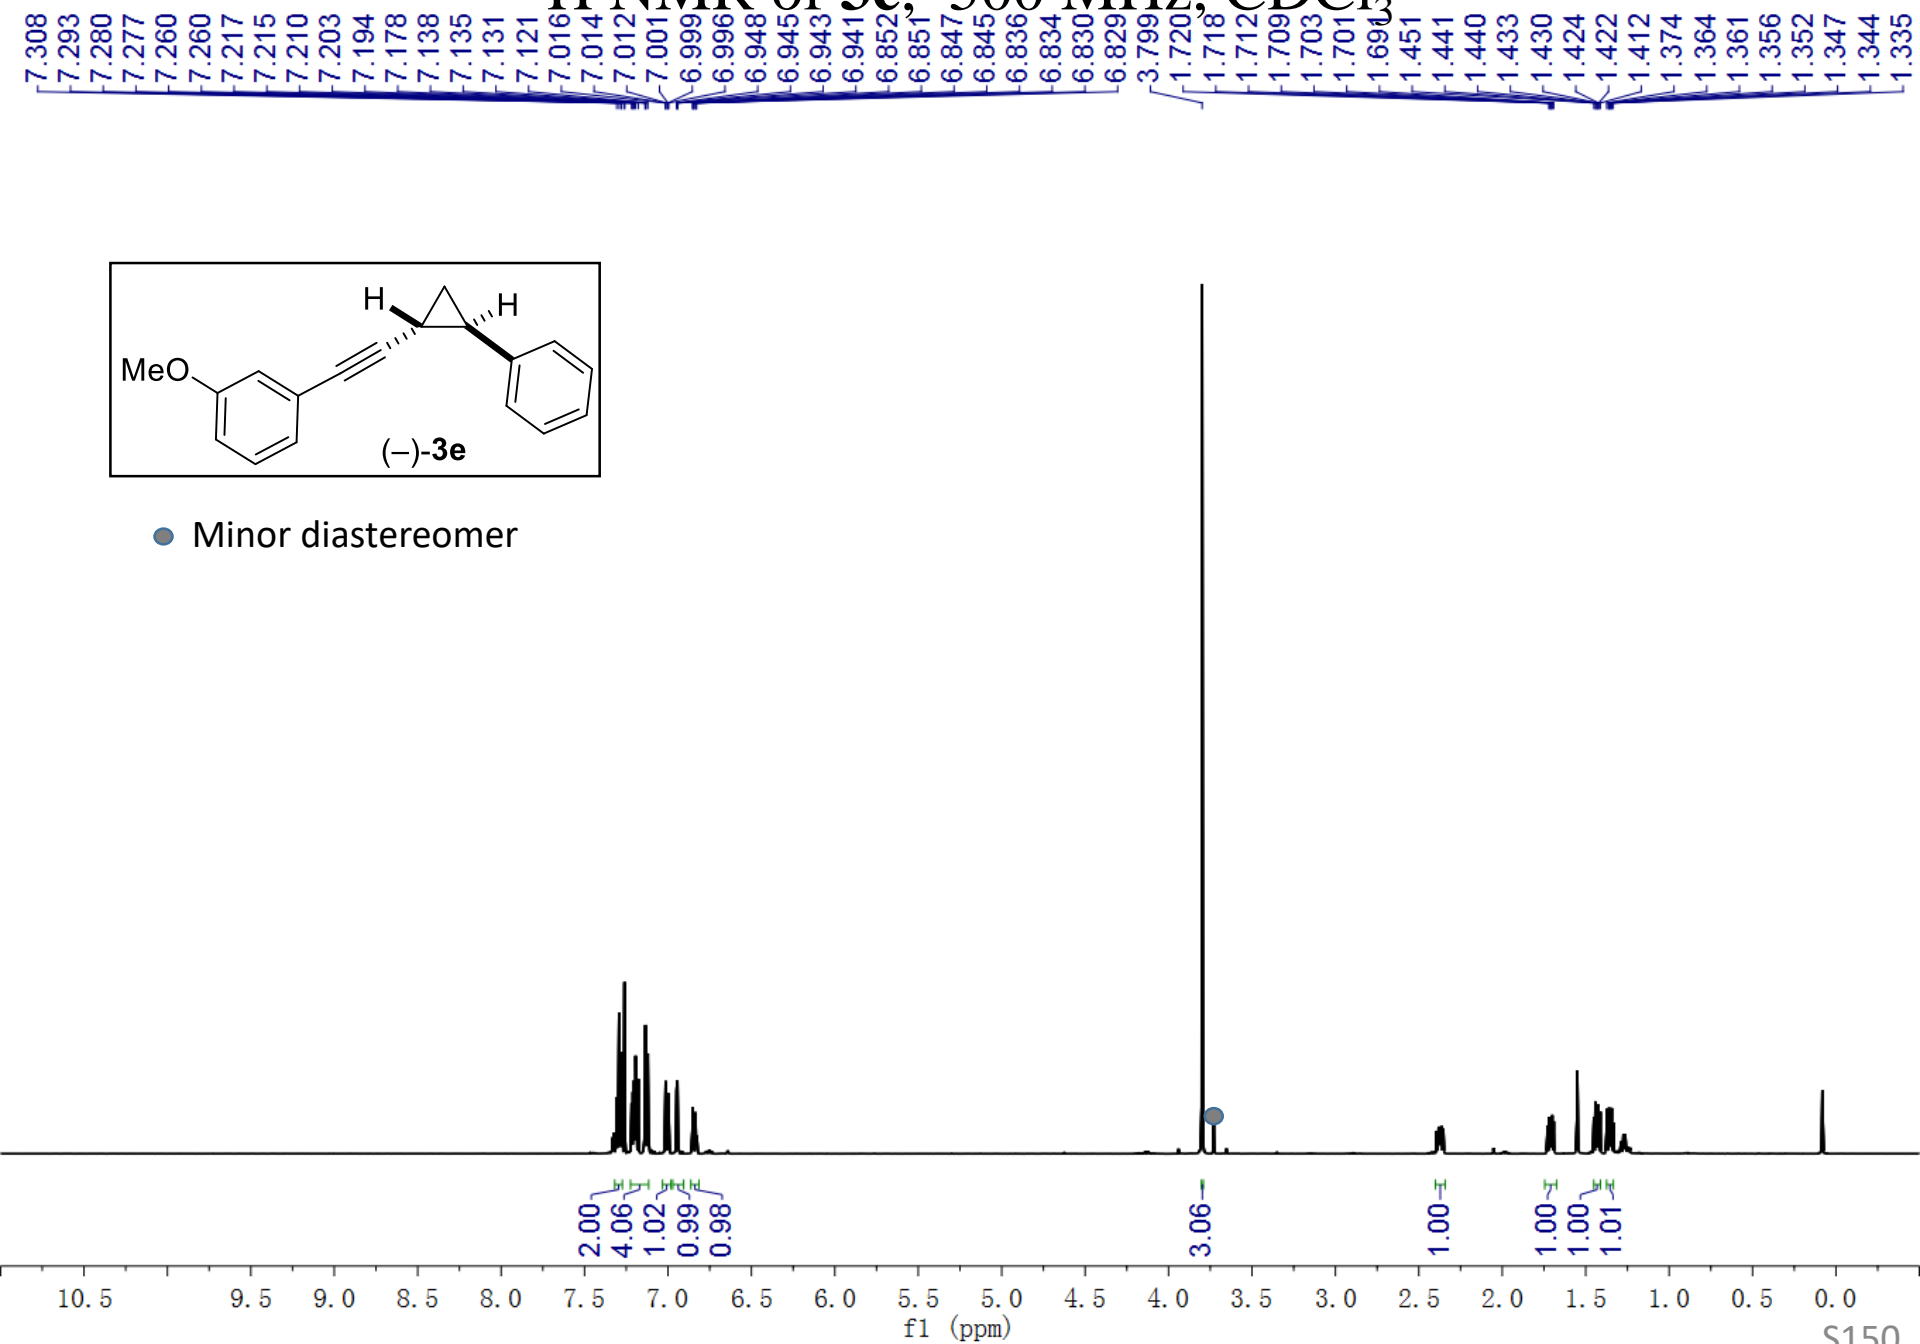

$^{13}\text{C}$  NMR of **3e**, 126 MHz,  $\text{CDCl}_3$

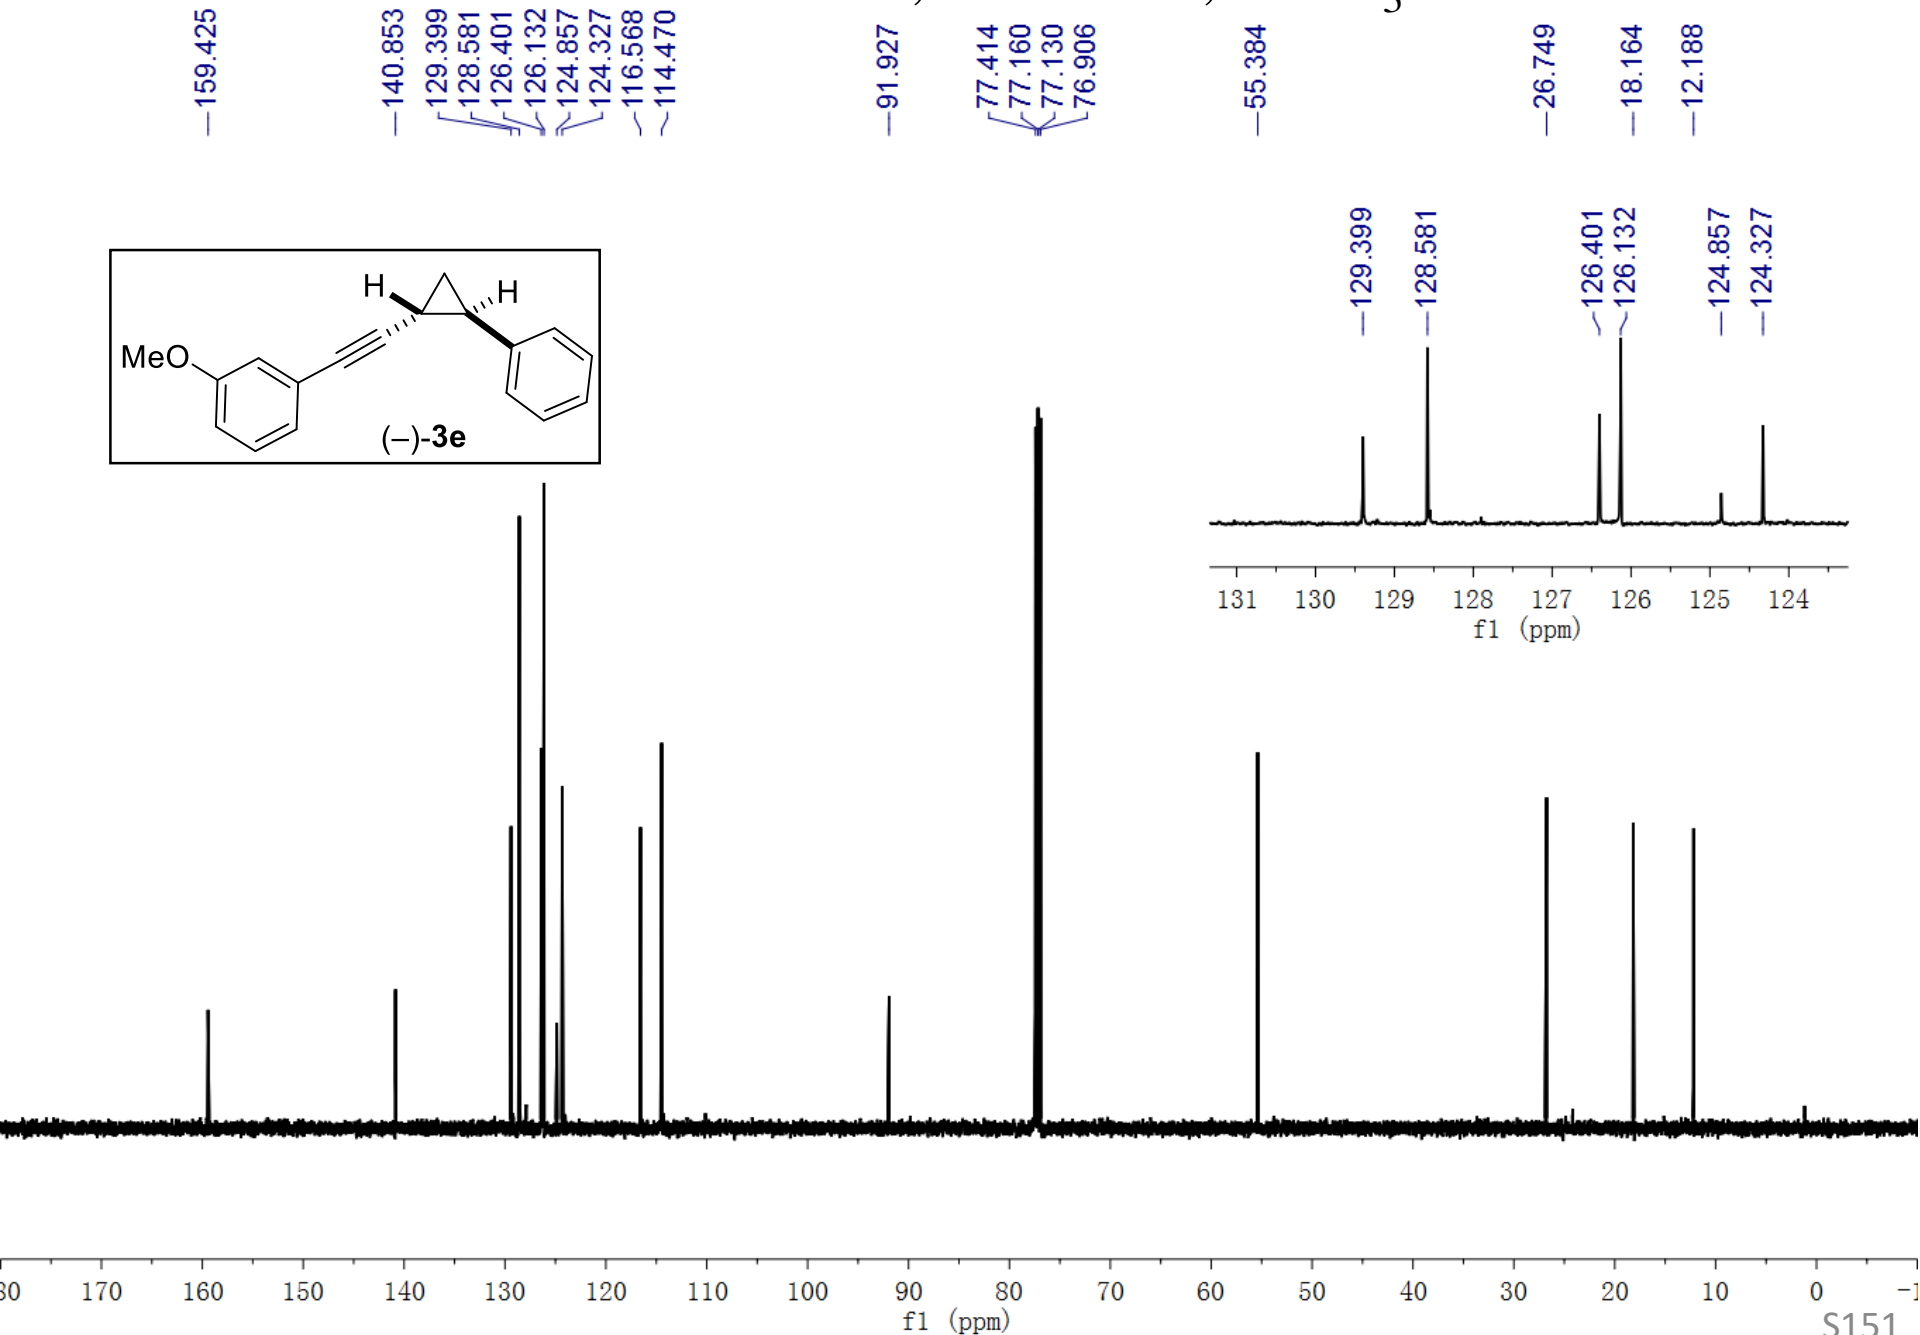

Data File : J0K-0606-IE-0.5%-0.8ML.lcd  
 Sample Name : J0K-0606-IE-0.5%-0.8ML  
 Sample ID : J0K-0606-IE-0.5%-0.8ML  
 Method File : J0K-0.5%--35min-0.8ml.lcm  
 Chromatogram

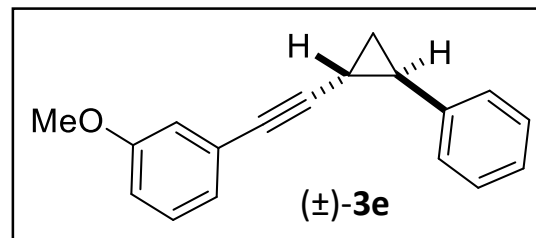

mAU

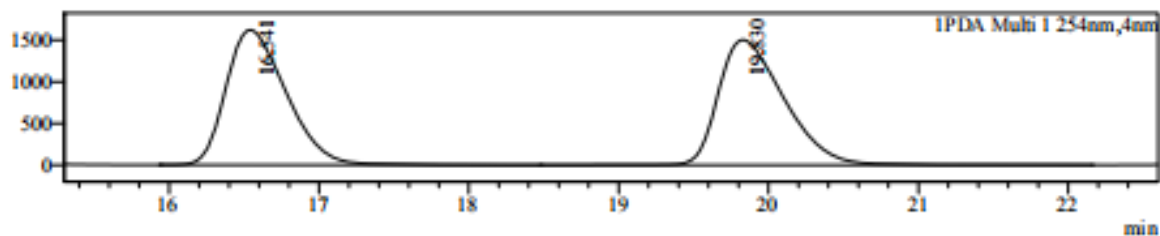

UV Spectrum

Retention time = 16.541

mAU

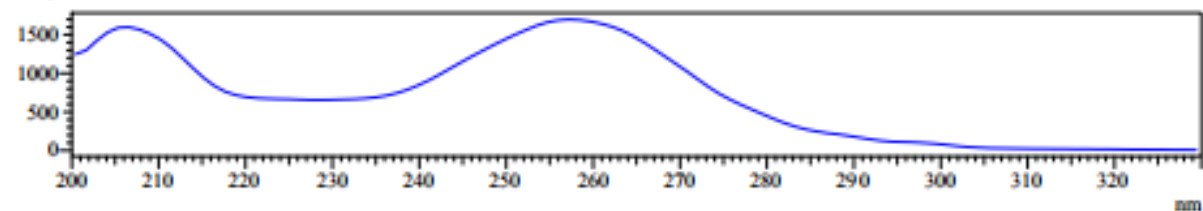

UV

Retention time = 19.830

mAU

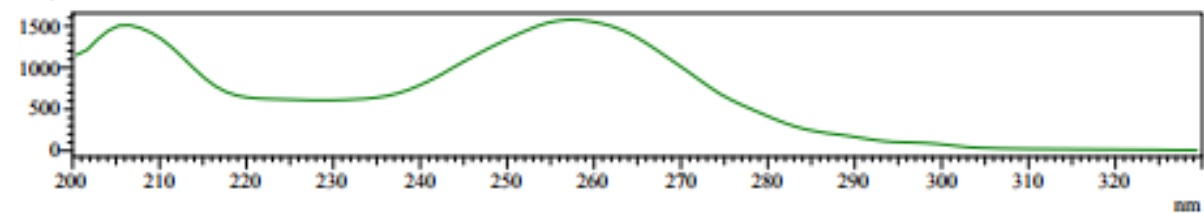

Peak Table

PDA Ch1 254nm

| Peak# | Ret. Time | Area     | Area%   |
|-------|-----------|----------|---------|
| 1     | 16.541    | 45091963 | 49.821  |
| 2     | 19.830    | 45416294 | 50.179  |
| Total |           | 90508257 | 100.000 |



Data File : J0K-0605-IE-2-0.5%-0.8ML.lcd  
 Sample Name : J0K-0605-IE-2-0.5%-0.8ML  
 Sample ID : J0K-0605-IE-2-0.5%-0.8ML  
 Method File : J0K-0.5%--35min-0.8ml.lcm  
 Chromatogram

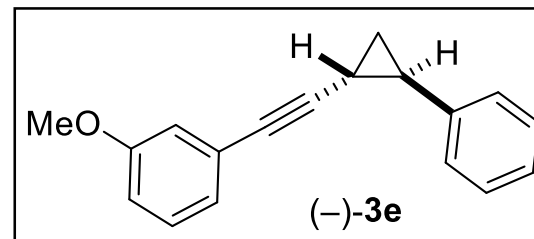

mAU

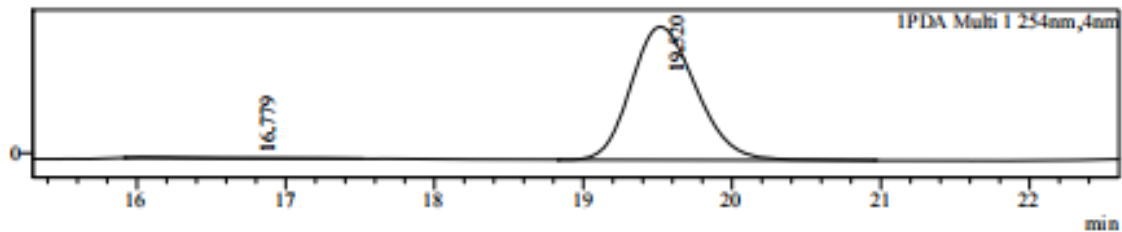

UV Spectrum  
 Retention time = 16.779

mAU

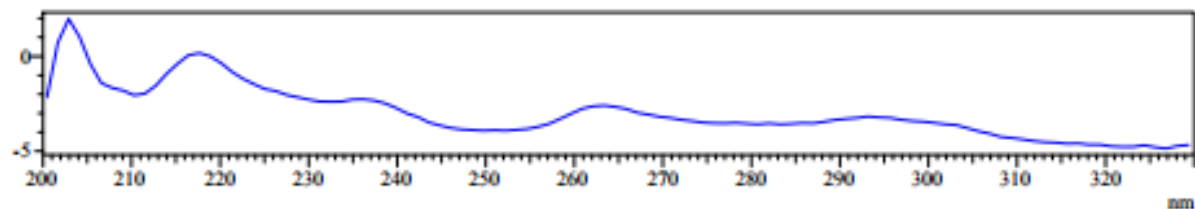

UV  
 Retention time = 19.520

mAU

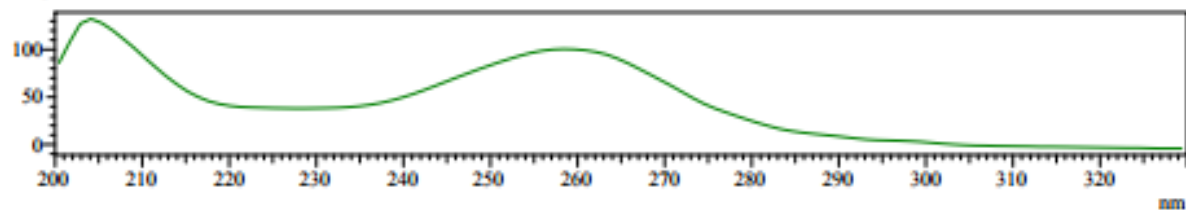

Peak Table

PDA Ch1 254nm

| Peak# | Ret. Time | Area    | Area%   |
|-------|-----------|---------|---------|
| 1     | 16.779    | 10536   | 0.348   |
| 2     | 19.520    | 3013872 | 99.652  |
| Total |           | 3024408 | 100.000 |

# $^1\text{H}$ NMR of **3f**, 600 MHz, $\text{CDCl}_3$

7.387  
7.385  
7.375  
7.372  
7.293  
7.280  
7.267  
7.260  
7.247  
7.235  
7.232  
7.201  
7.189  
7.177  
7.128  
7.115  
6.895  
6.882  
6.870  
6.862  
6.848

3.882

2.412  
2.402  
2.394  
2.389  
2.379

1.779  
1.476  
1.467  
1.461  
1.459  
1.453  
1.444  
1.366  
1.356  
1.351  
1.347  
1.341  
1.333

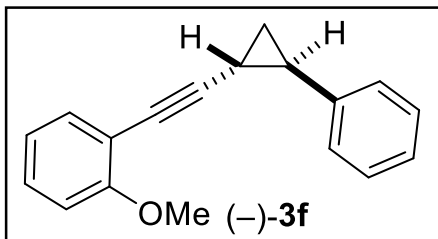

● Minor diastereomer

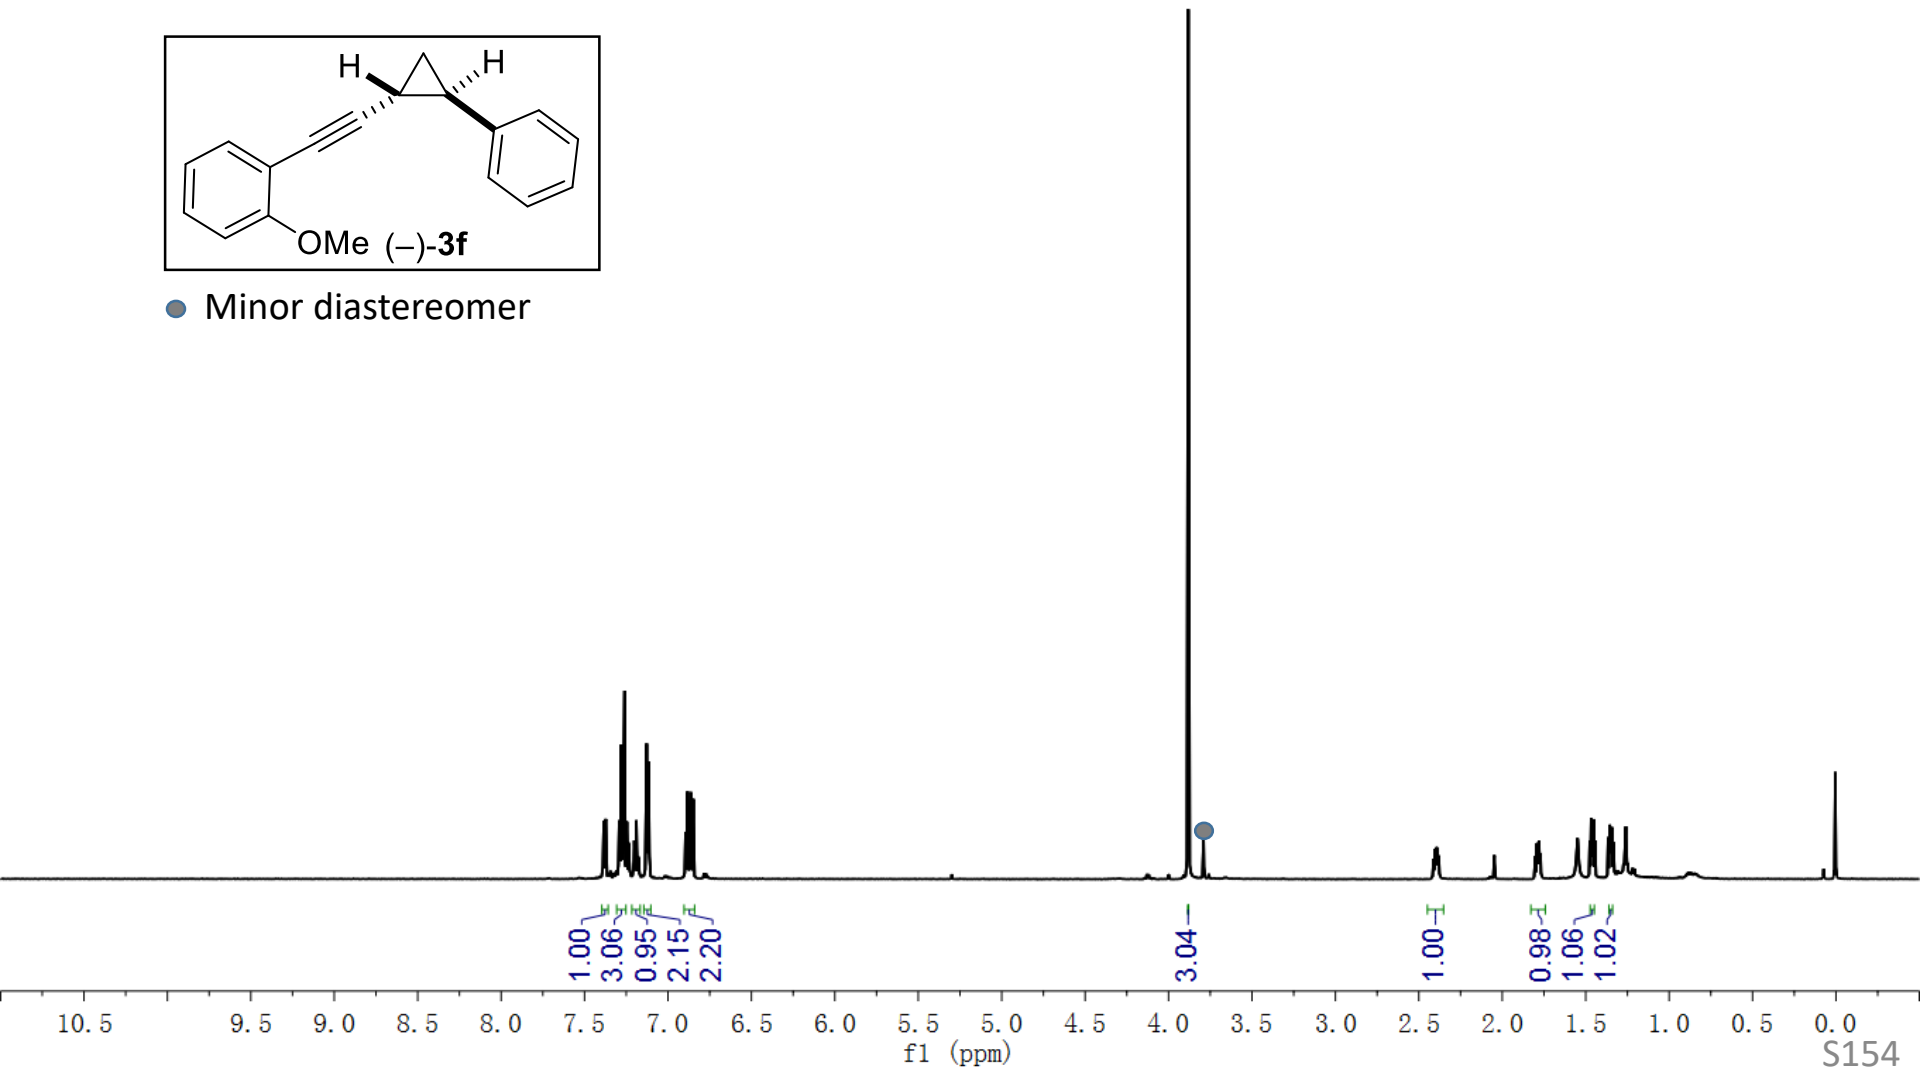

$^{13}\text{C}$  NMR of **3f**, 151 MHz,  $\text{CDCl}_3$

—160.154

—141.039

—133.845

—129.152

—128.532

—126.306

—126.123

—120.545

—112.930

—110.673

—96.204

—77.372

—77.169

—76.948

—73.240

—55.924

—26.888

—18.483

—12.603

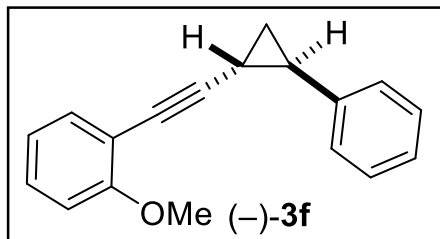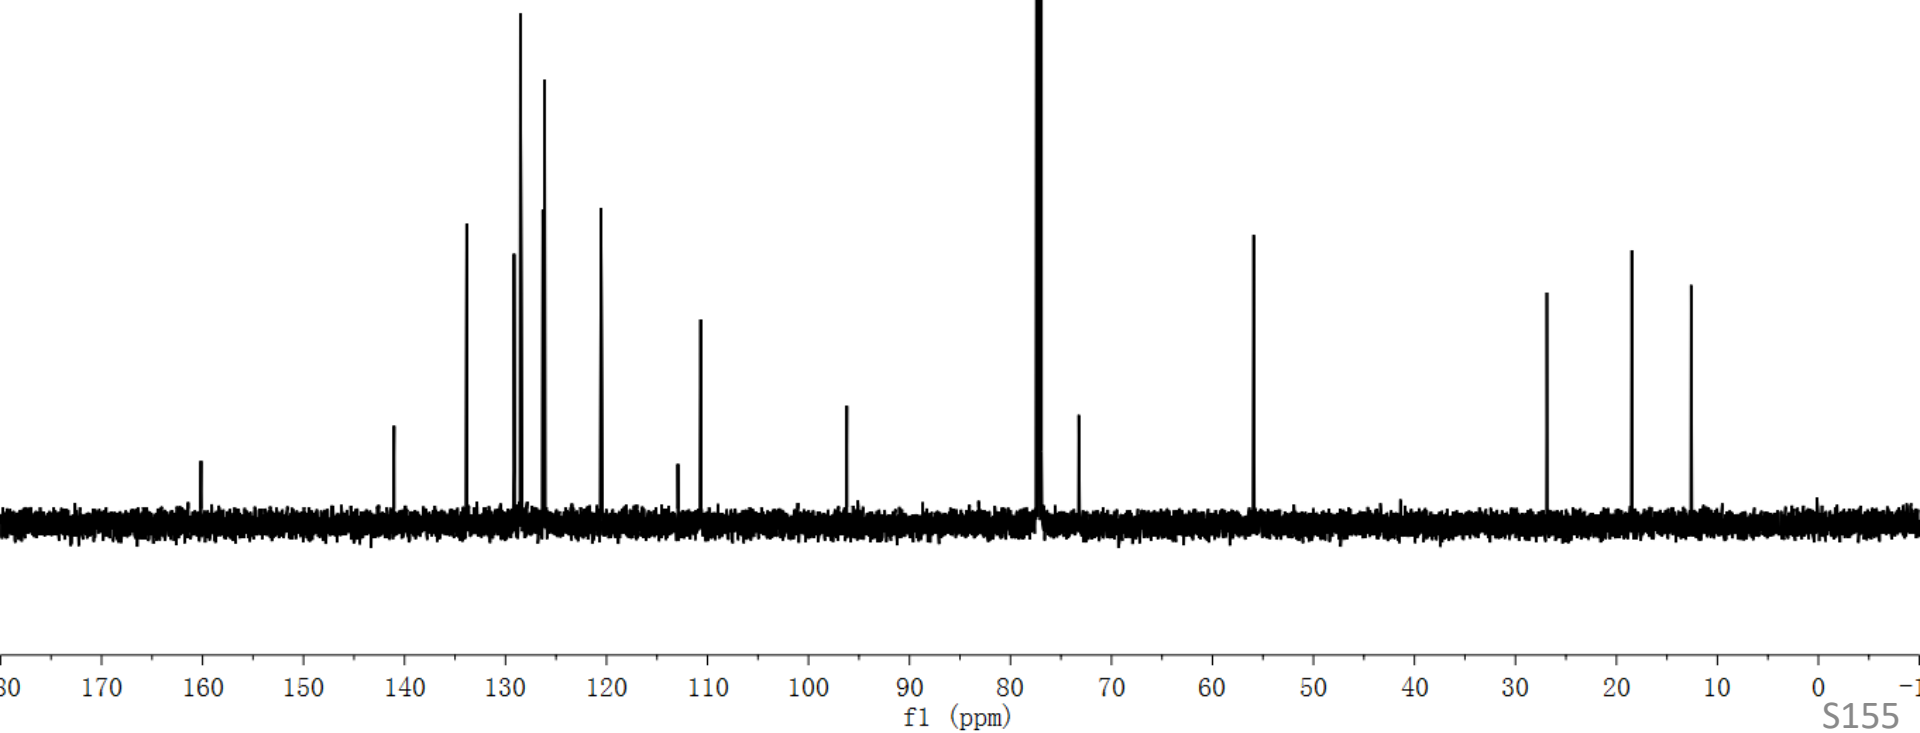

Data File : J0K-0143-IA-1%-0.8ML-isopropanol-solvent005.lcd  
 Sample Name : J0K-0143-IA-1%-0.8ML-isopropanol-solvent005  
 Sample ID : J0K-0143-IA-1%-0.8ML-isopropano  
 Method File : J0K-1%-0.8ml.lcm

Chromatogram

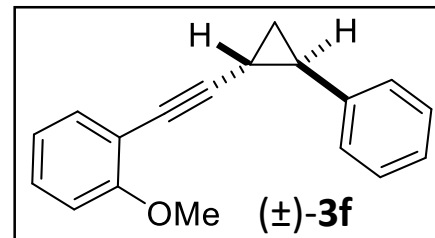

mAU

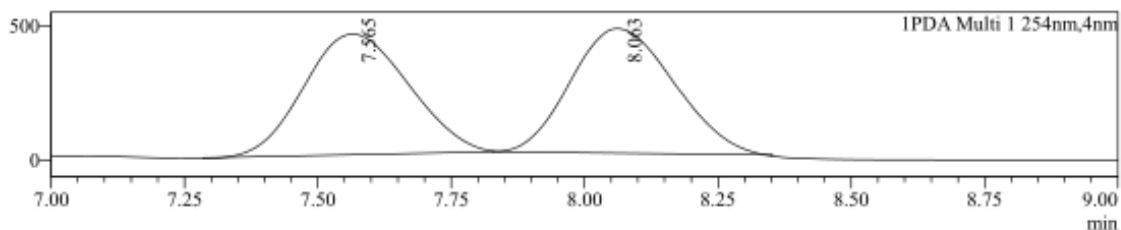

UV Spectrum  
 Retention time = 7.565

mAU

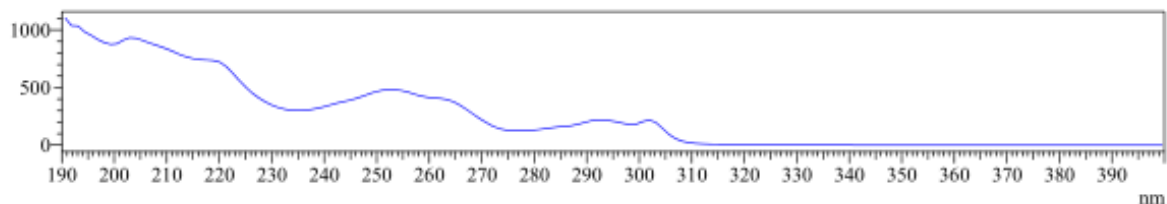

UV Spectrum  
 Retention time = 8.063

mAU

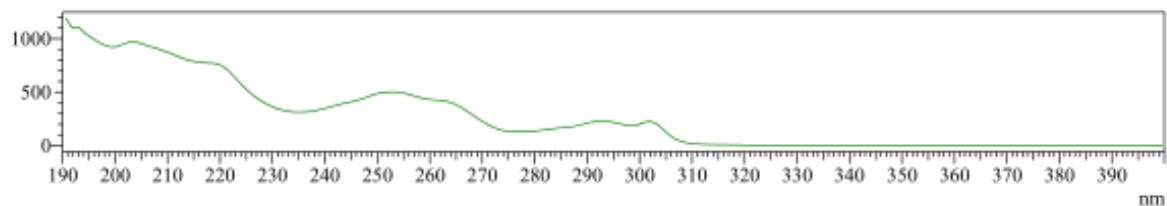

Peak Table

PDA Ch1 254nm

| Peak# | Ret. Time | Area     | Area%   |
|-------|-----------|----------|---------|
| 1     | 7.565     | 6121948  | 49.586  |
| 2     | 8.063     | 6224168  | 50.414  |
| Total |           | 12346117 | 100.000 |

Data File : J0K-0153-IA-6-1%-0.8ML-isopropanol-solvent005.lcd  
 Sample Name : J0K-0153-IA-6-1%-0.8ML-isopropanol-solvent005  
 Sample ID : J0K-0153-IA-6-1%-0.8ML-isopropa  
 Method File : J0K-1%--15min-0.8ml.lcm

Chromatogram

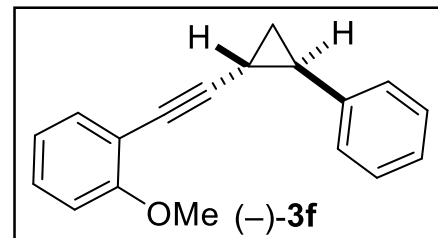

mAU

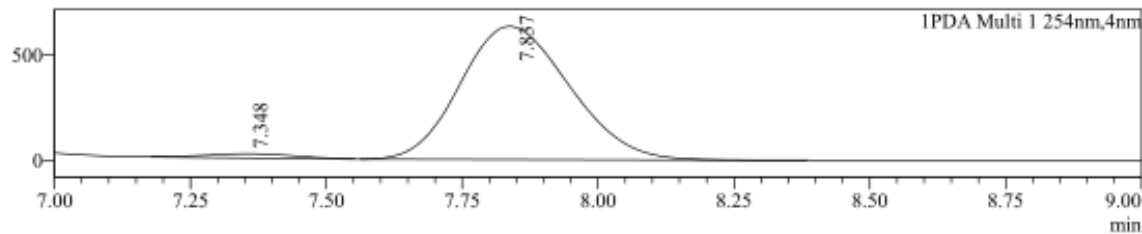

UV Spectrum

Retention time = 7.348

mAU

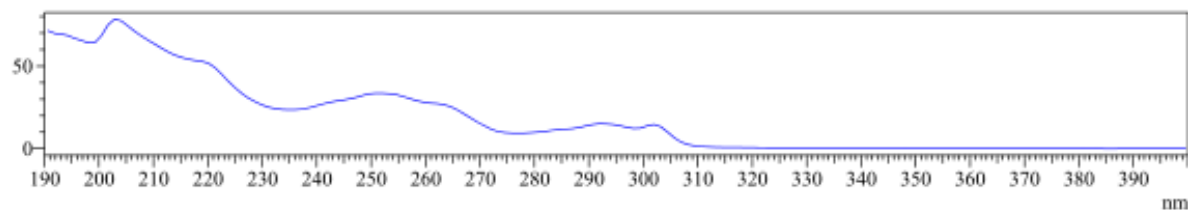

UV Spectrum

Retention time = 7.837

mAU

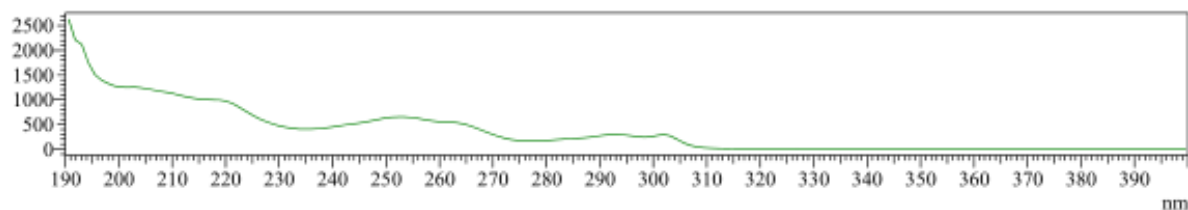

Peak Table

PDA Ch1 254nm

| Peak# | Ret. Time | Area    | Area%   |
|-------|-----------|---------|---------|
| 1     | 7.348     | 224745  | 2.487   |
| 2     | 7.837     | 8812566 | 97.513  |
| Total |           | 9037311 | 100.000 |

# $^1\text{H}$ NMR of **3g**, 600 MHz, $\text{CDCl}_3$

7.577  
7.573  
7.564  
7.560  
7.470  
7.466  
7.456  
7.453  
7.314  
7.300  
7.284  
7.233  
7.230  
7.228  
7.219  
7.216  
7.212  
7.203  
7.201  
7.199  
7.135  
7.132  
7.118

2.421  
2.412  
2.409  
2.404  
2.400  
2.395  
2.391  
2.382

1.732  
1.726  
1.717  
1.715  
1.464  
1.453  
1.447  
1.435  
1.429  
1.419  
1.416  
1.411  
1.399

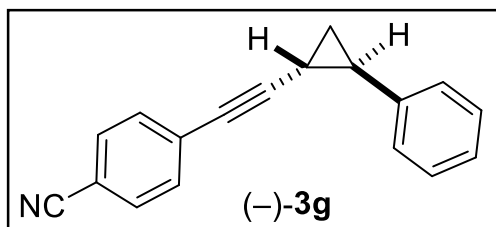

● Minor diastereomer

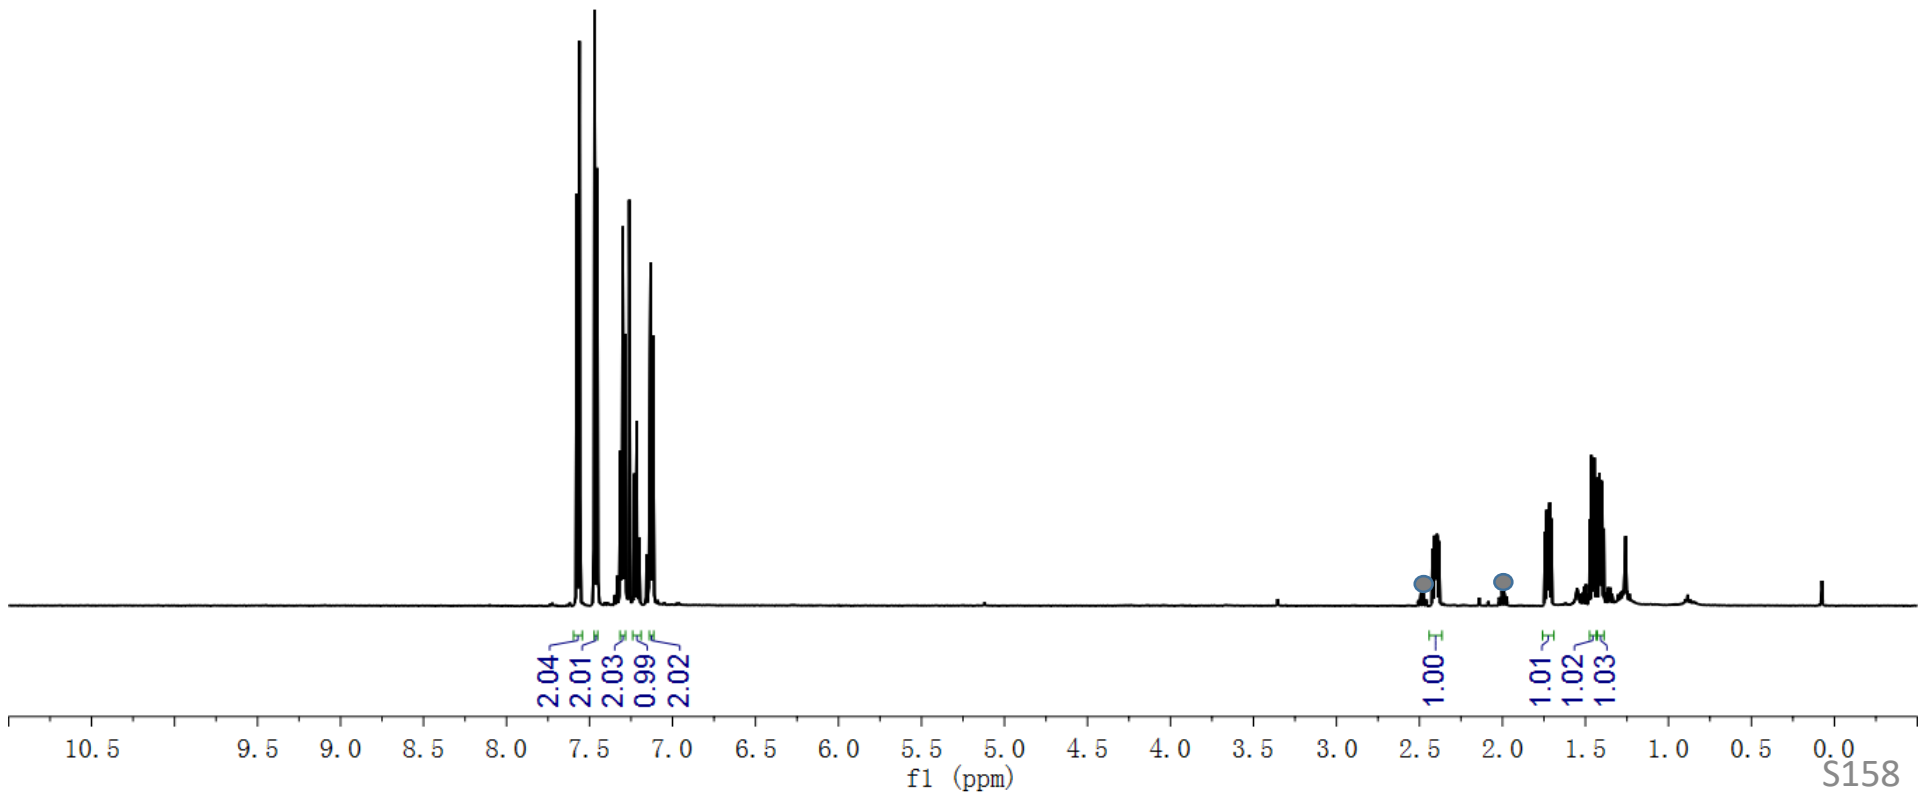

<sup>13</sup>C NMR of **3g**, 151 MHz, CDCl<sub>3</sub>

—140.313  
132.216  
132.071  
128.667  
126.641  
126.143  
—110.987  
—97.267  
77.371  
77.160  
76.948  
76.055  
—27.041  
—18.219  
—12.114

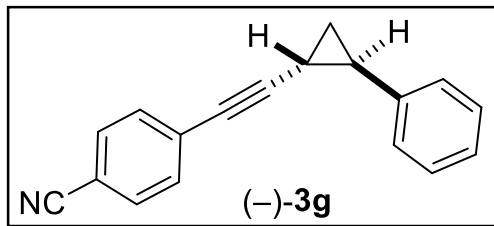

● Minor diastereomer

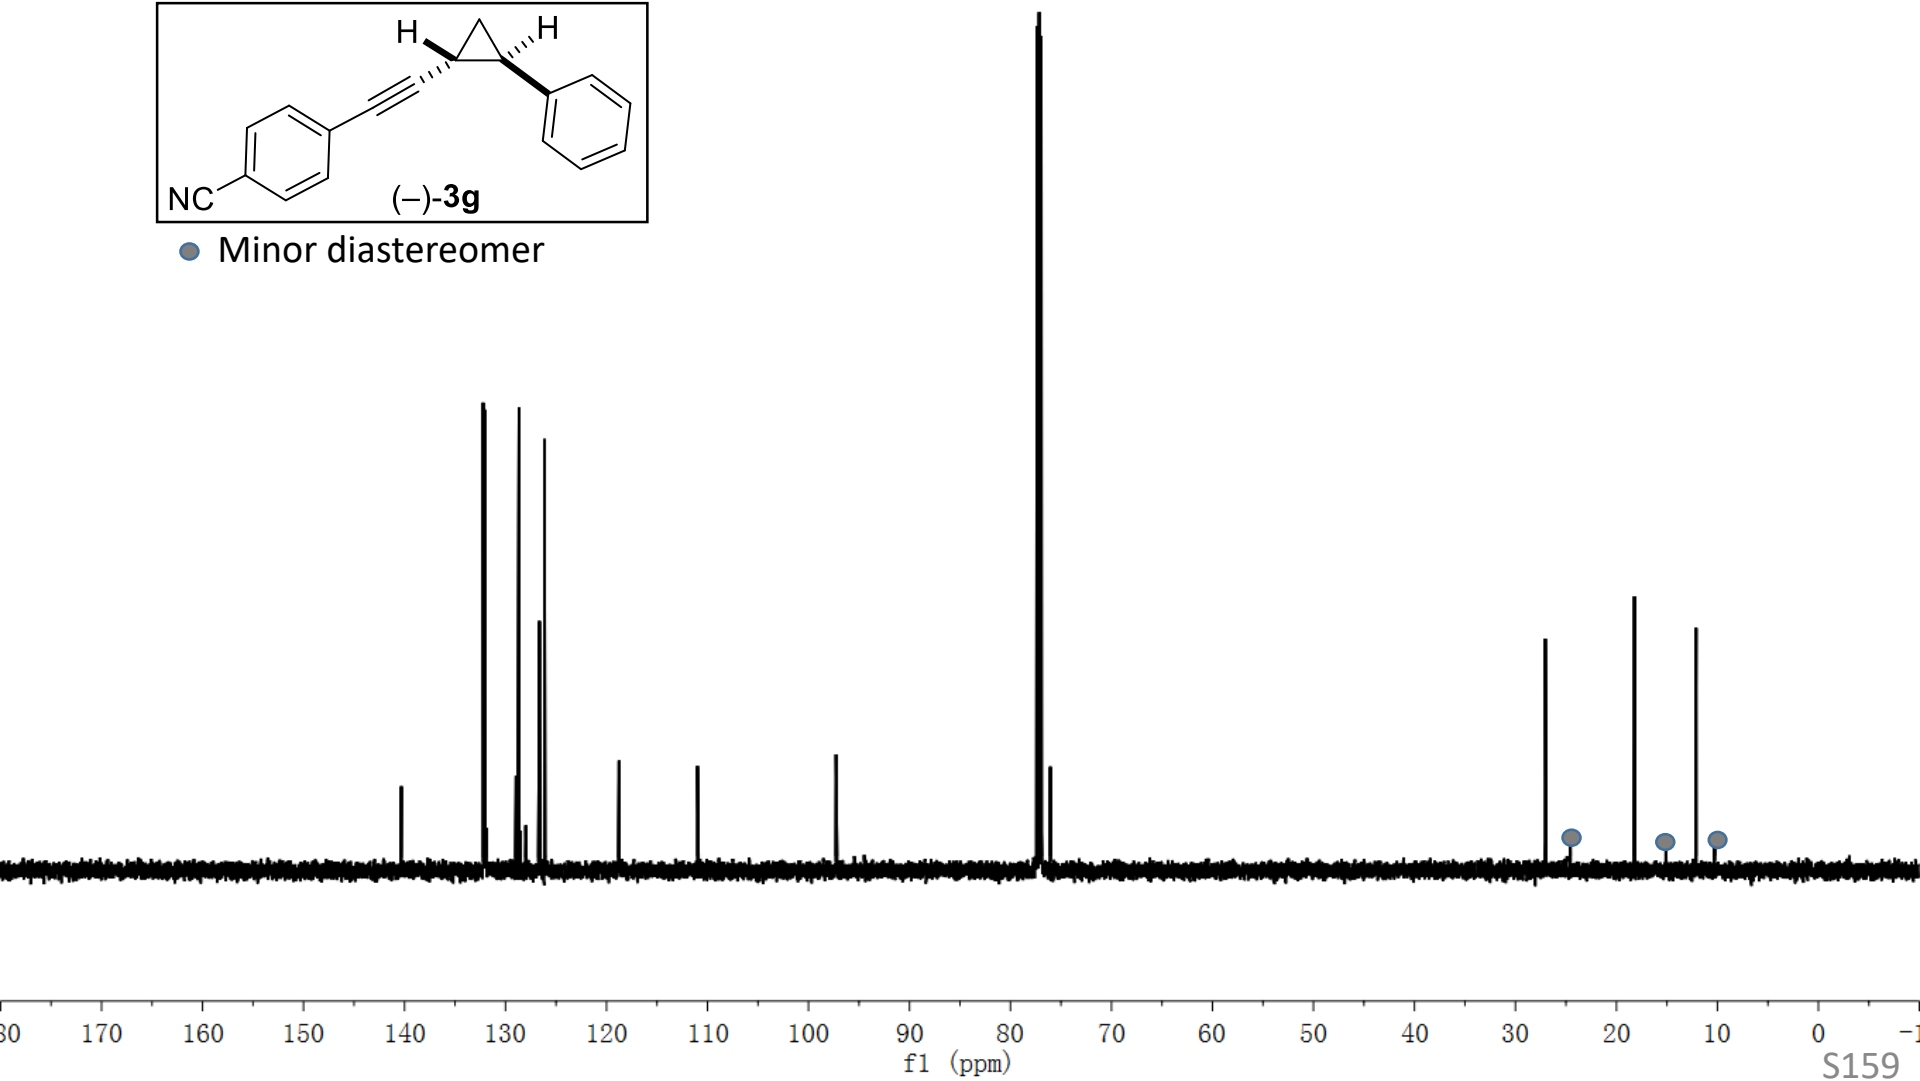

Data File : J0K-1474-IA--0.8%-1ML.lcd  
 Sample Name : J0K-1474-IA--0.8%-1ML  
 Sample ID : J0K-1474-IA--0.8%-1ML  
 Method File : J0K-0.8%-50min-1ml.lcm  
 Chromatogram

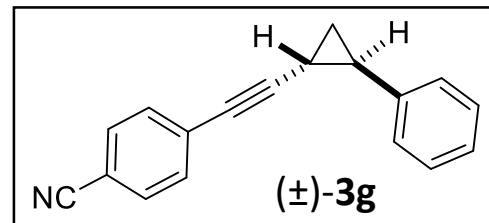

AU

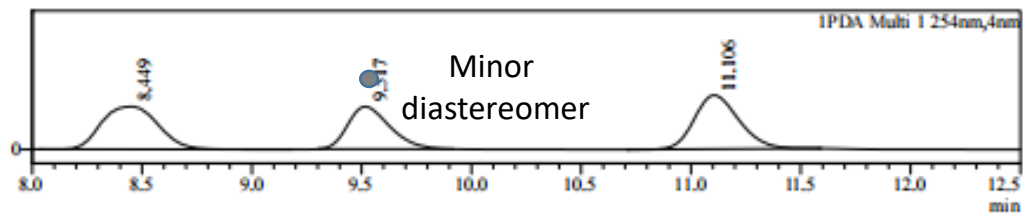

UV Spectrum  
 Retention time = 8.449

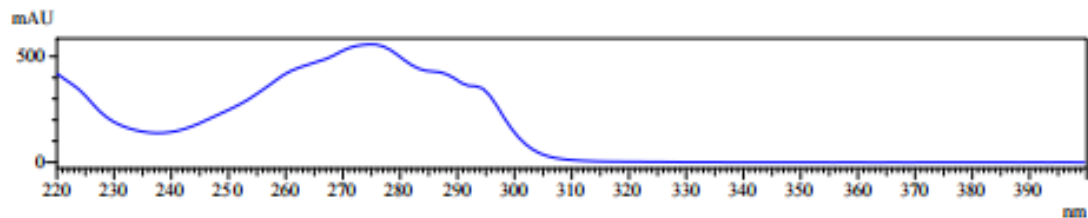

UV Spectrum  
 Retention time = 11.106

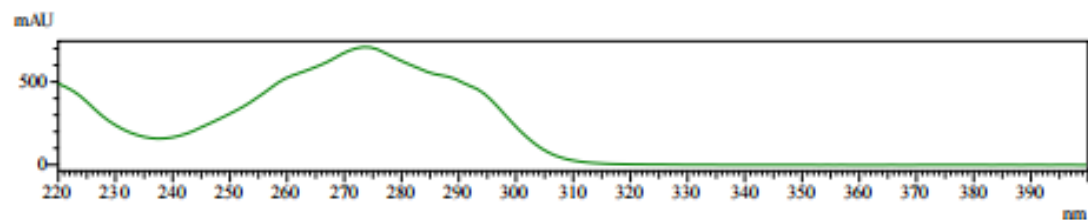

Peak Table

PDA Ch1 254nm

| Peak# | Ret. Time | Area     | Area%   |
|-------|-----------|----------|---------|
| 1     | 8.449     | 5520988  | 36.621  |
| 2     | 9.517     | 4073960  | 27.023  |
| 3     | 11.106    | 5480991  | 36.356  |
| Total |           | 15075939 | 100.000 |



Data File : JOK-1473-IA--0.8%-1ML.lcd  
 Sample Name : JOK-1473-IA--0.8%-1ML  
 Sample ID : JOK-1473-IA--0.8%-1ML  
 Method File : JOK-0.8%-50min-1ml.lcm

Chromatogram

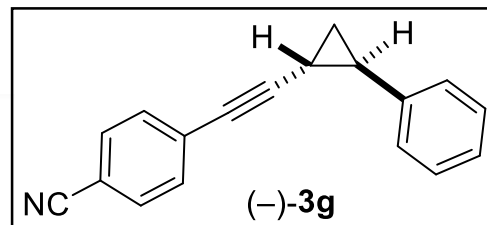

AU

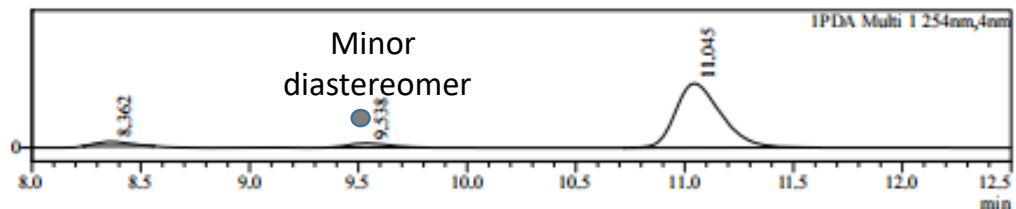

UV Spectrum

Retention time = 8.362

mAU

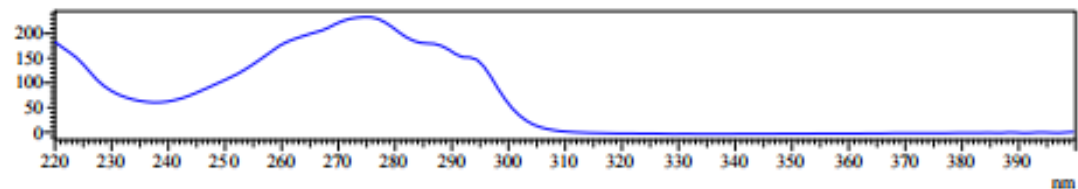

UV Spectrum

Retention time = 11.045

mAU

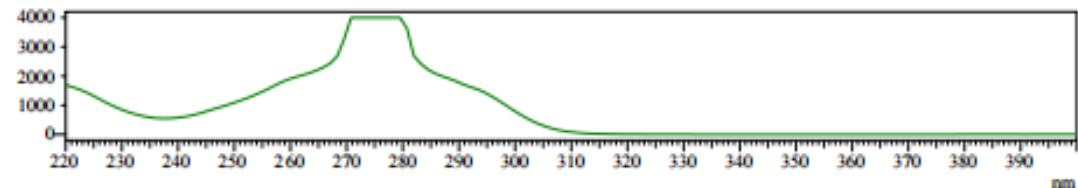

Peak Table

PDA Ch1 254nm

| Peak# | Ret. Time | Area     | Area%   |
|-------|-----------|----------|---------|
| 1     | 8.362     | 1045994  | 4.641   |
| 2     | 9.538     | 1171121  | 5.196   |
| 3     | 11.045    | 20321950 | 90.163  |
| Total |           | 22539065 | 100.000 |

# $^1\text{H}$ NMR of **3h**, 400 MHz, $\text{CDCl}_3$

7.408  
7.396  
7.384  
7.329  
7.317  
7.303  
7.291  
7.279  
7.251  
7.240  
7.228  
7.215  
7.203  
7.190  
7.136  
7.123  
7.074  
7.061  
7.046  
7.031

2.419  
2.410  
2.403  
2.396  
2.387  
2.045  
2.035  
2.020  
1.772  
1.763  
1.755  
1.749  
1.741  
1.478  
1.469  
1.461  
1.454  
1.446  
1.392  
1.382  
1.379  
1.375  
1.367  
1.359

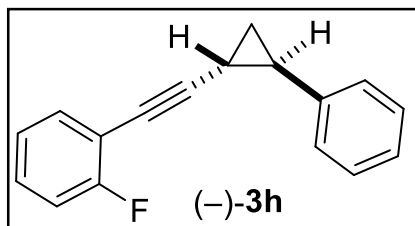

● Minor diastereomer

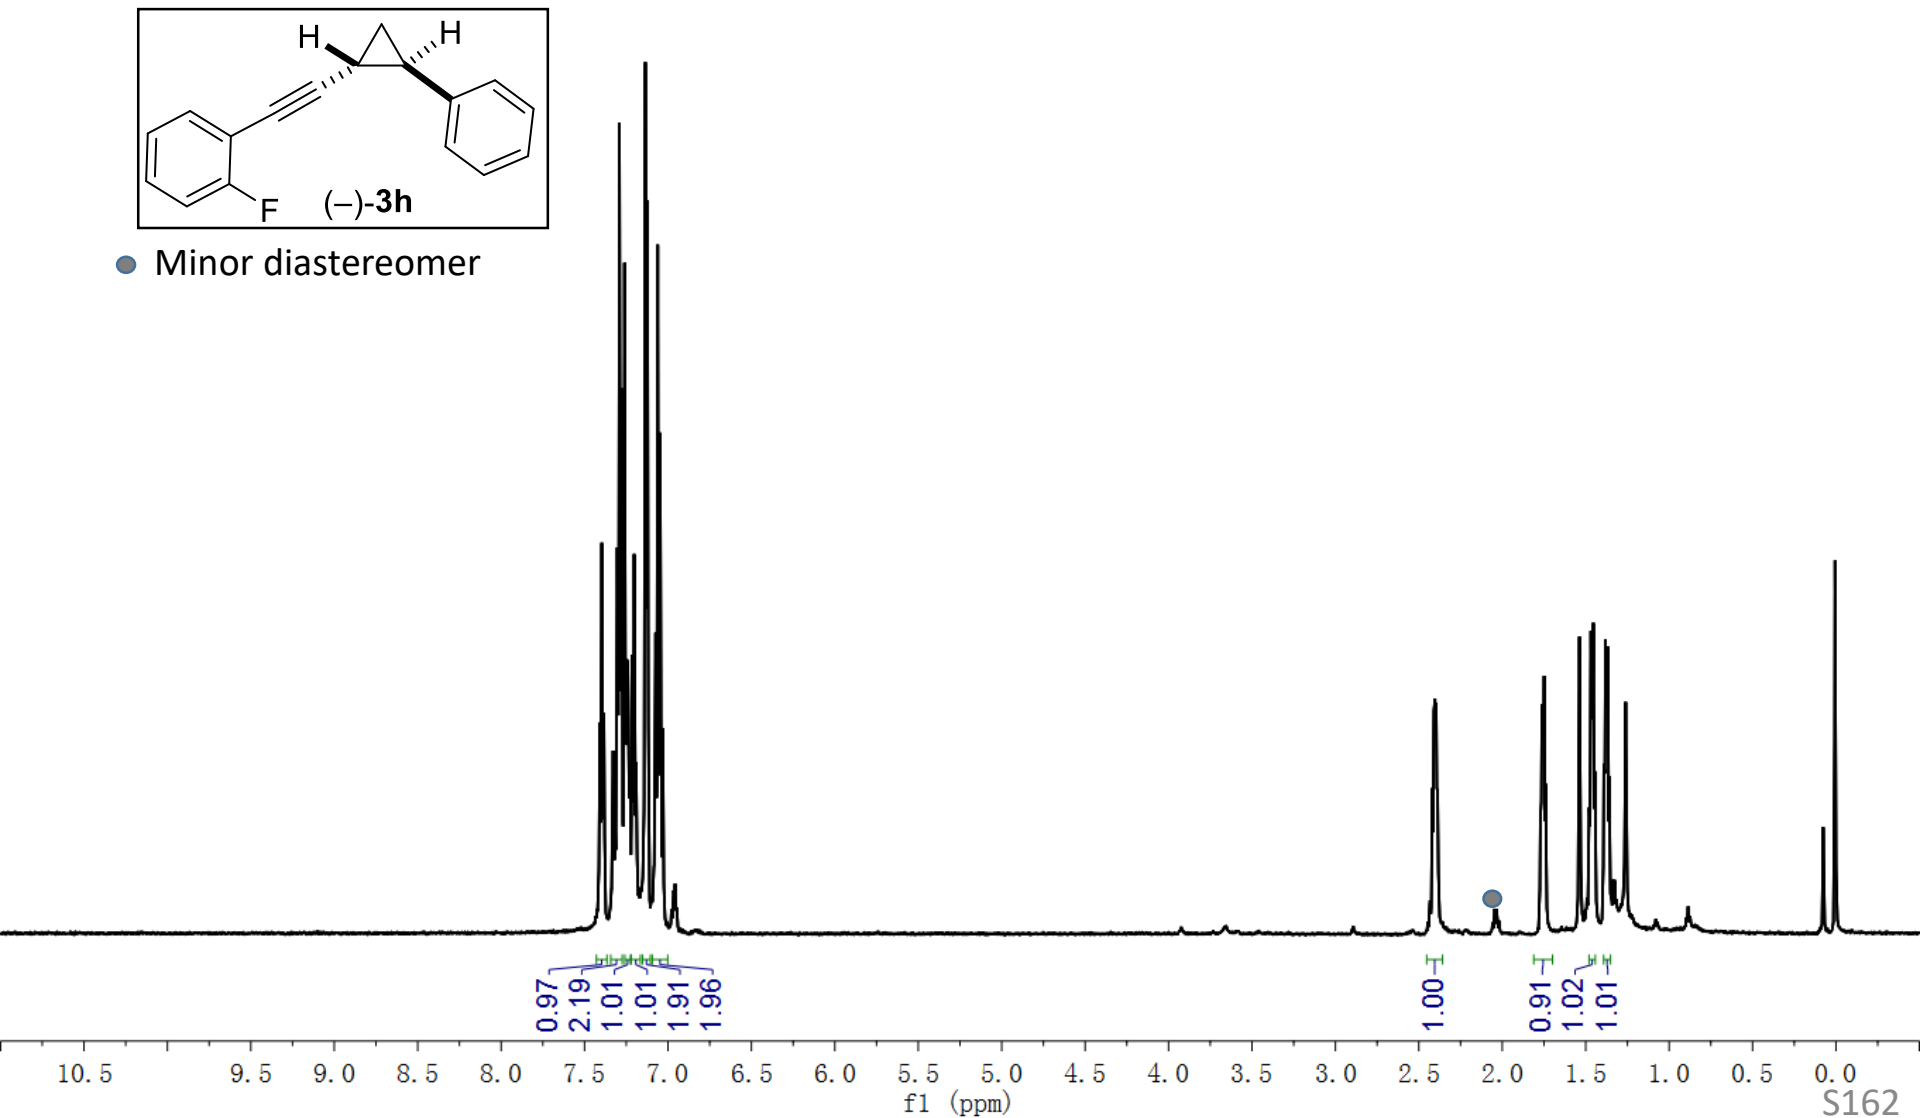

# $^{13}\text{C}$ NMR of **3h**, 151 MHz, $\text{CDCl}_3$

163.879  
162.219

140.708

133.716

129.363

128.585

126.445

126.132

119.586

115.427

112.422

112.318

97.445

97.424

77.369

77.160

76.948

70.466

26.878

18.290

12.287

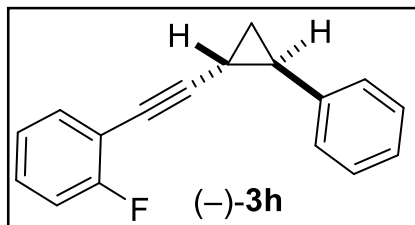

● Minor diastereomer

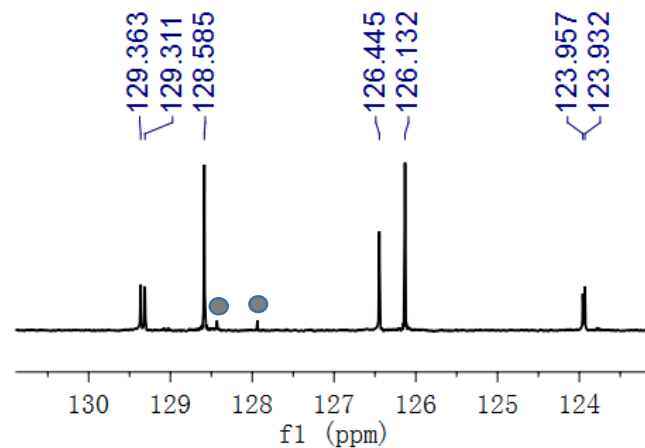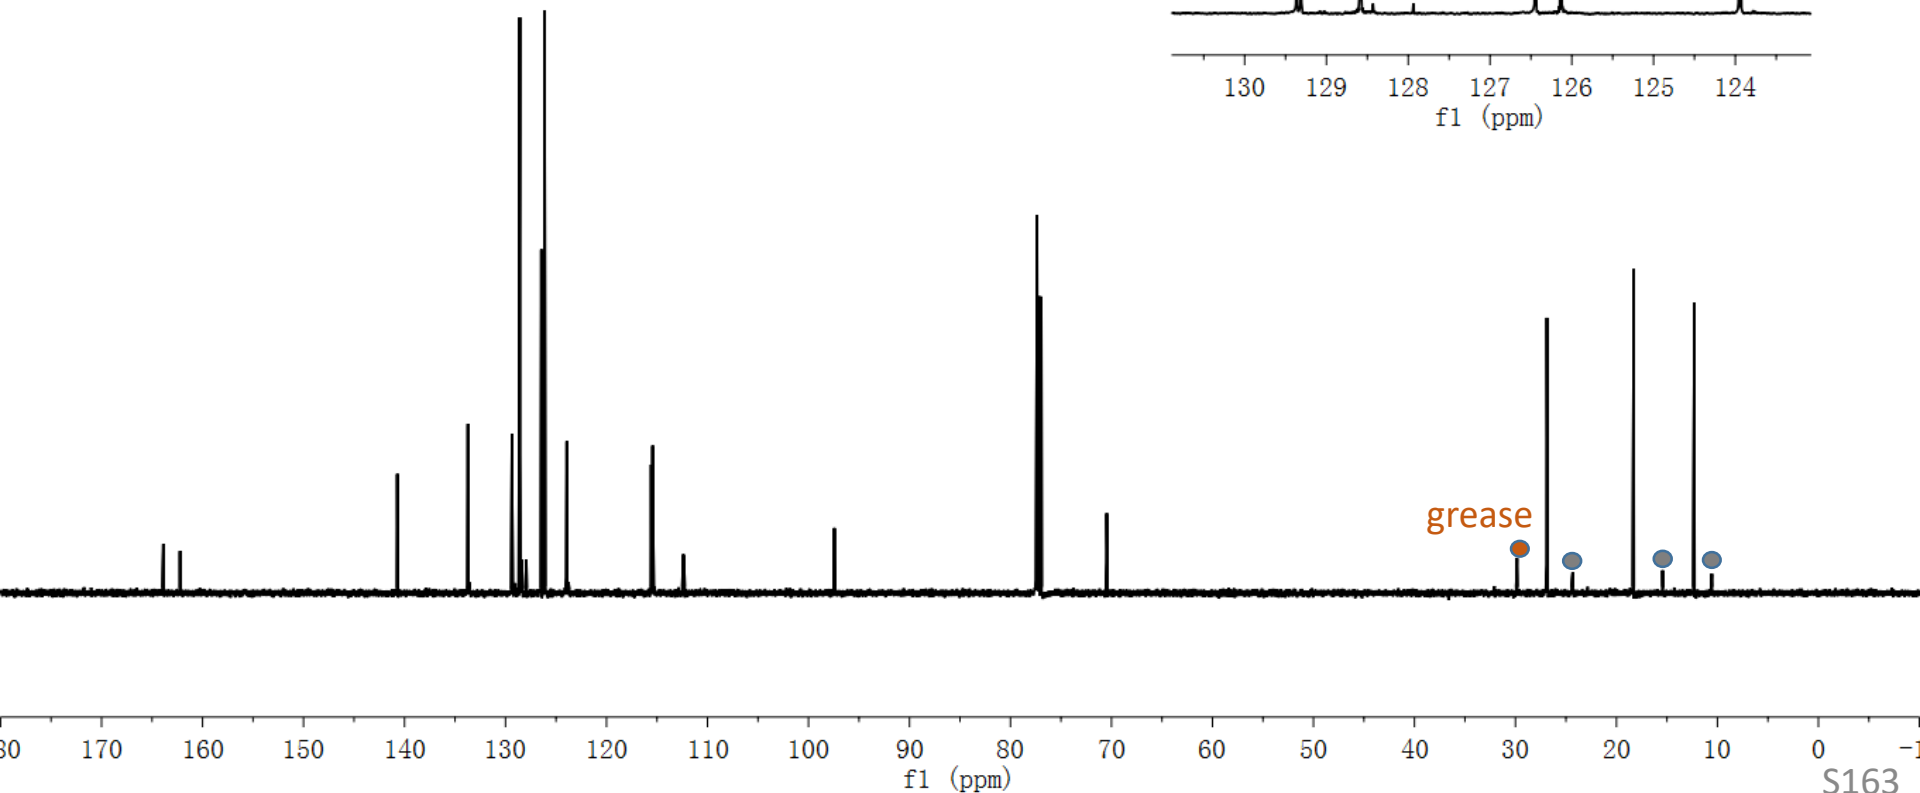

$^{19}\text{F}$  NMR of **3h**, 564 MHz,  $\text{CDCl}_3$



--110.855

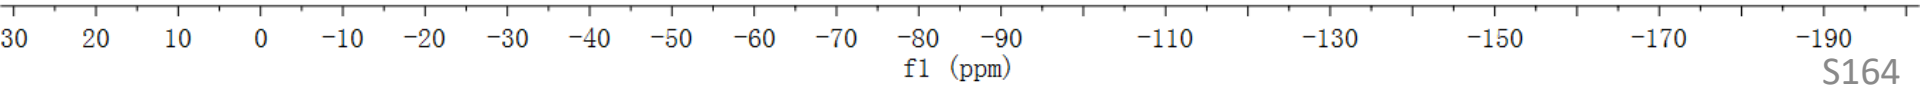

Data File : J0K-0222-4-IC-0%-0.8ML-isopropanol-solvent003.lcd  
 Sample Name : J0K-0222-4-IC-0%-0.8ML-isopropanol-solvent003  
 Sample ID : J0K-0222-4-IC-0%-0.8ML-isopropa  
 Method File : J0K-0%-0.8ml.kem

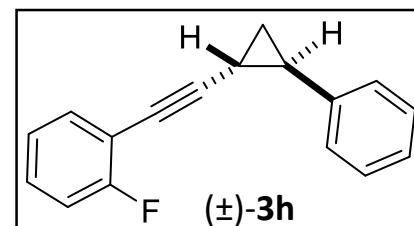

Chromatogram

mAU

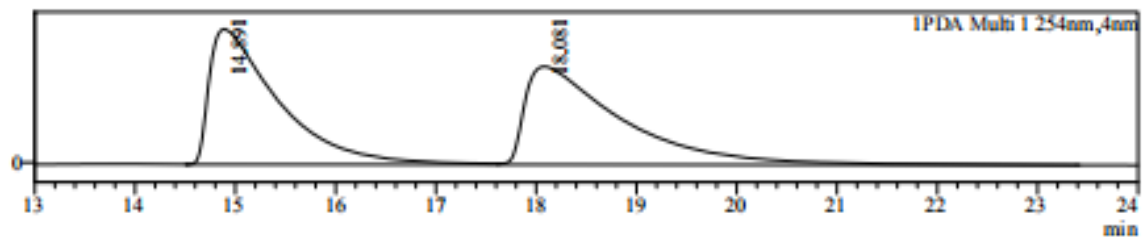

UV Spectrum  
 Retention time = 14.891

mAU

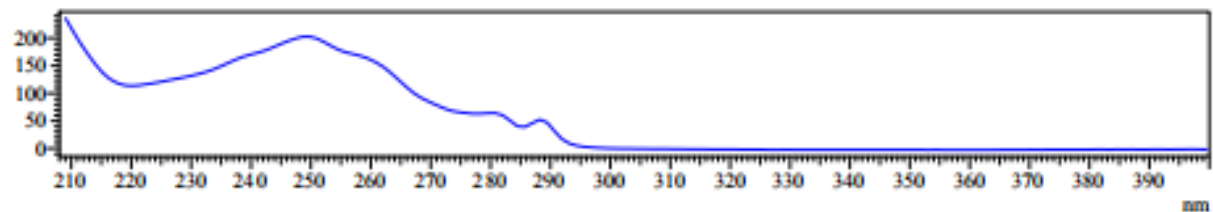

UV Spectrum  
 Retention time = 18.081

mAU

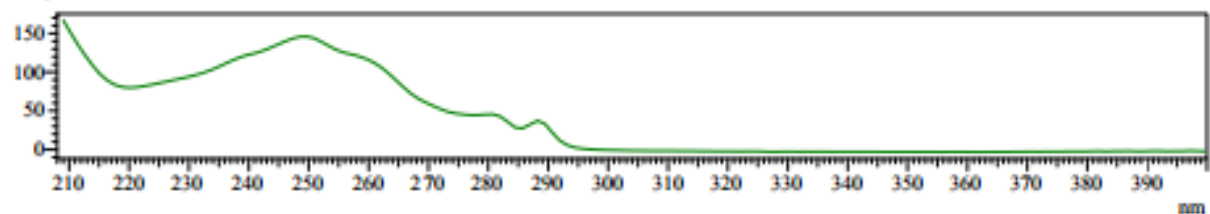

Peak Table

PDA Ch1 254nm

| Peak# | Ret. Time | Area     | Area%   |
|-------|-----------|----------|---------|
| 1     | 14.891    | 8882879  | 49.608  |
| 2     | 18.081    | 9023178  | 50.392  |
| Total |           | 17906056 | 100.000 |

Data File : J0K-0223-4-IC-0%-0.8ML-isopropanol-solvent004.lcd  
 Sample Name : J0K-0223-4-IC-0%-0.8ML-isopropanol-solvent004  
 Sample ID : J0K-0223-4-IC-0%-0.8ML-isopropa  
 Method File : J0K-0%-0.8ml.lcm

Chromatogram

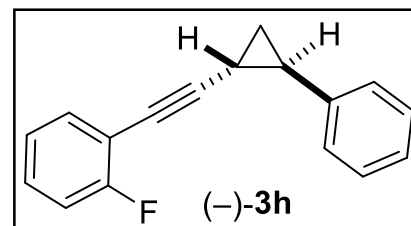

mAU

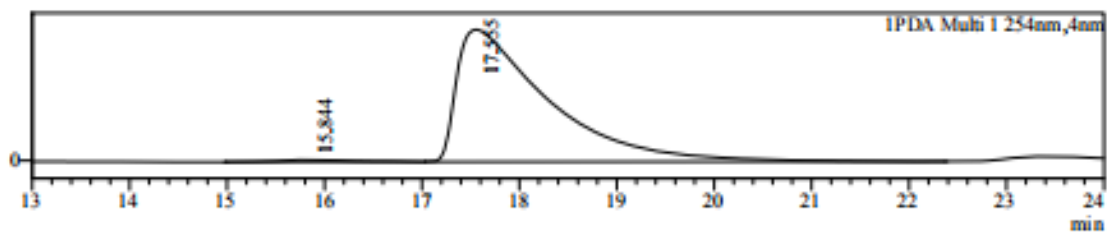

UV Spectrum

Retention time = 15.844

mAU

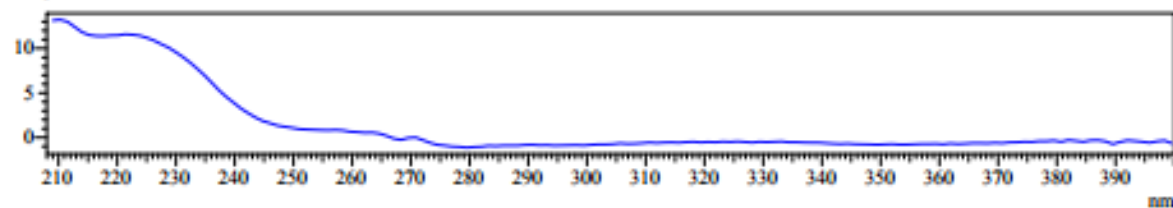

UV

Retention time = 17.555

mAU

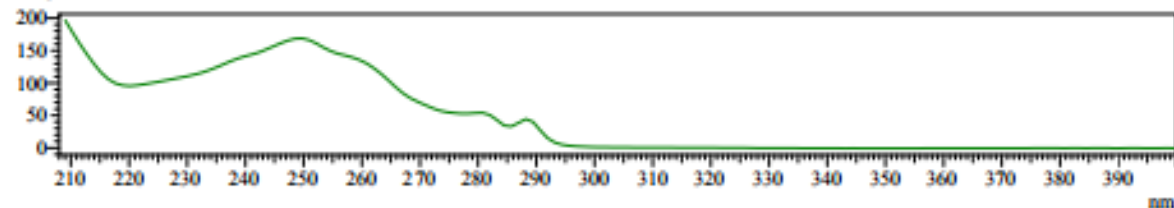

Peak Table

PDA Ch1 254nm

| Peak# | Ret. Time | Area     | Area%   |
|-------|-----------|----------|---------|
| 1     | 15.844    | 125202   | 1.231   |
| 2     | 17.555    | 10045730 | 98.769  |
| Total |           | 10170931 | 100.000 |

# $^1\text{H}$ NMR of **3i**, 500 MHz, $\text{CDCl}_3$

8.365  
8.348  
7.864  
7.848  
7.811  
7.794  
7.670  
7.667  
7.655  
7.653  
7.601  
7.590  
7.587  
7.584  
7.573  
7.571  
7.544  
7.542  
7.531  
7.528  
7.526  
7.437  
7.422  
7.420  
7.406  
7.351  
7.340  
7.337  
7.324  
7.321  
7.260  
7.256  
7.244  
7.201  
7.198  
7.184  
7.183  
1.906  
1.900  
1.897  
1.891  
1.889  
1.587  
1.578  
1.576  
1.570  
1.566  
1.560  
1.558  
1.548  
1.480  
1.471  
1.468  
1.463  
1.458  
1.453  
1.450  
1.441

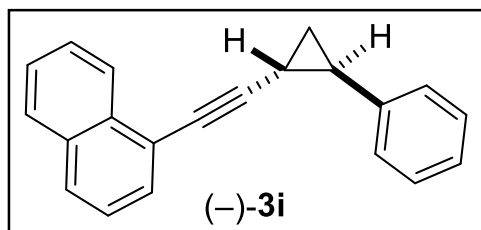

● Minor diastereomer

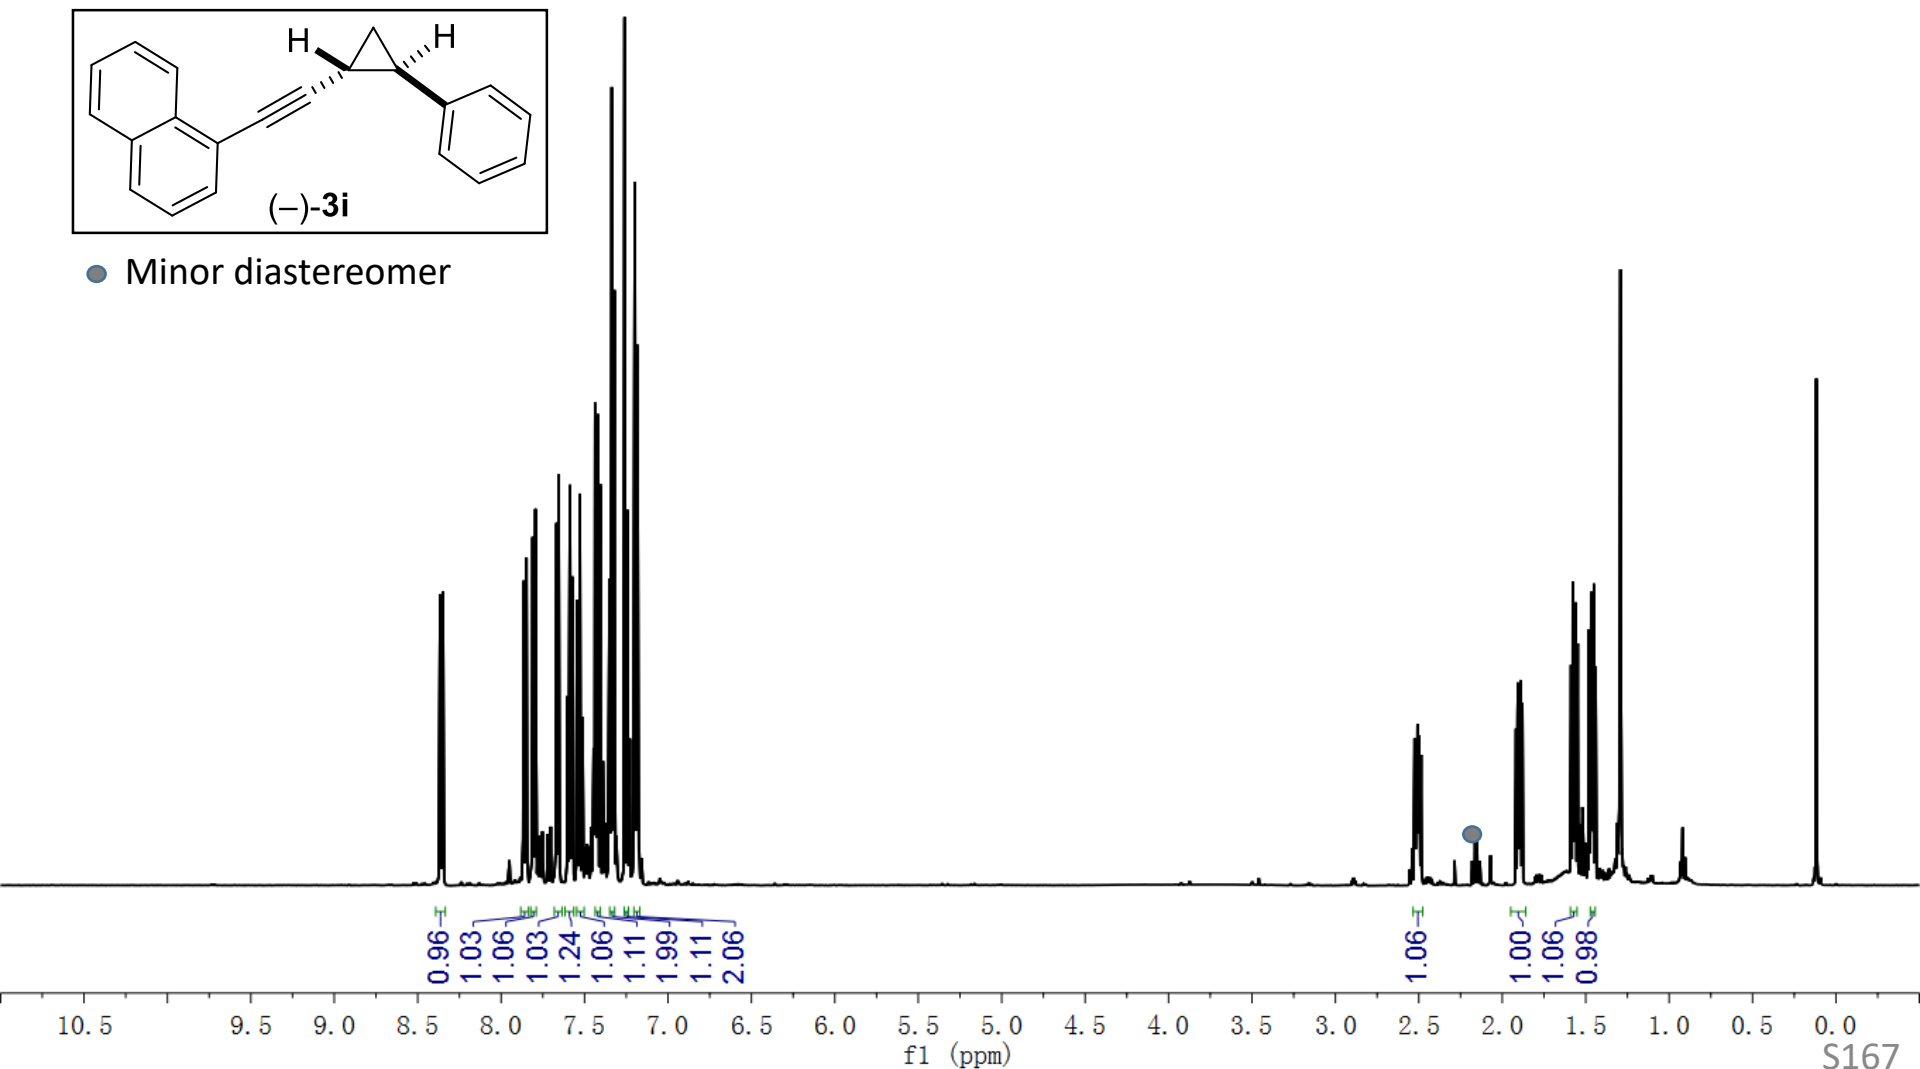

$^{13}\text{C}$  NMR of **3i**, 126 MHz,  $\text{CDCl}_3$

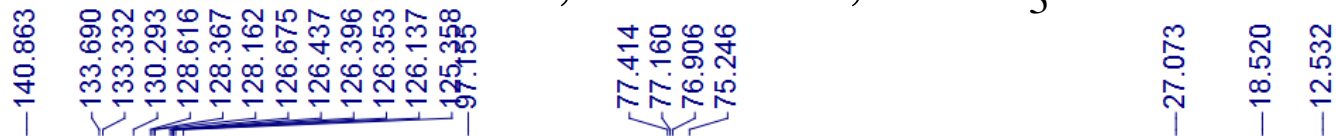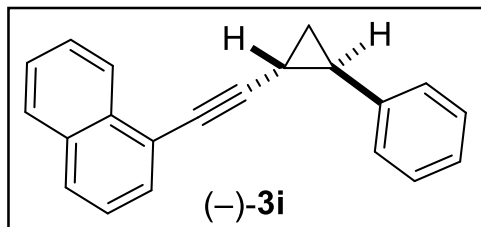

● Minor diastereomer

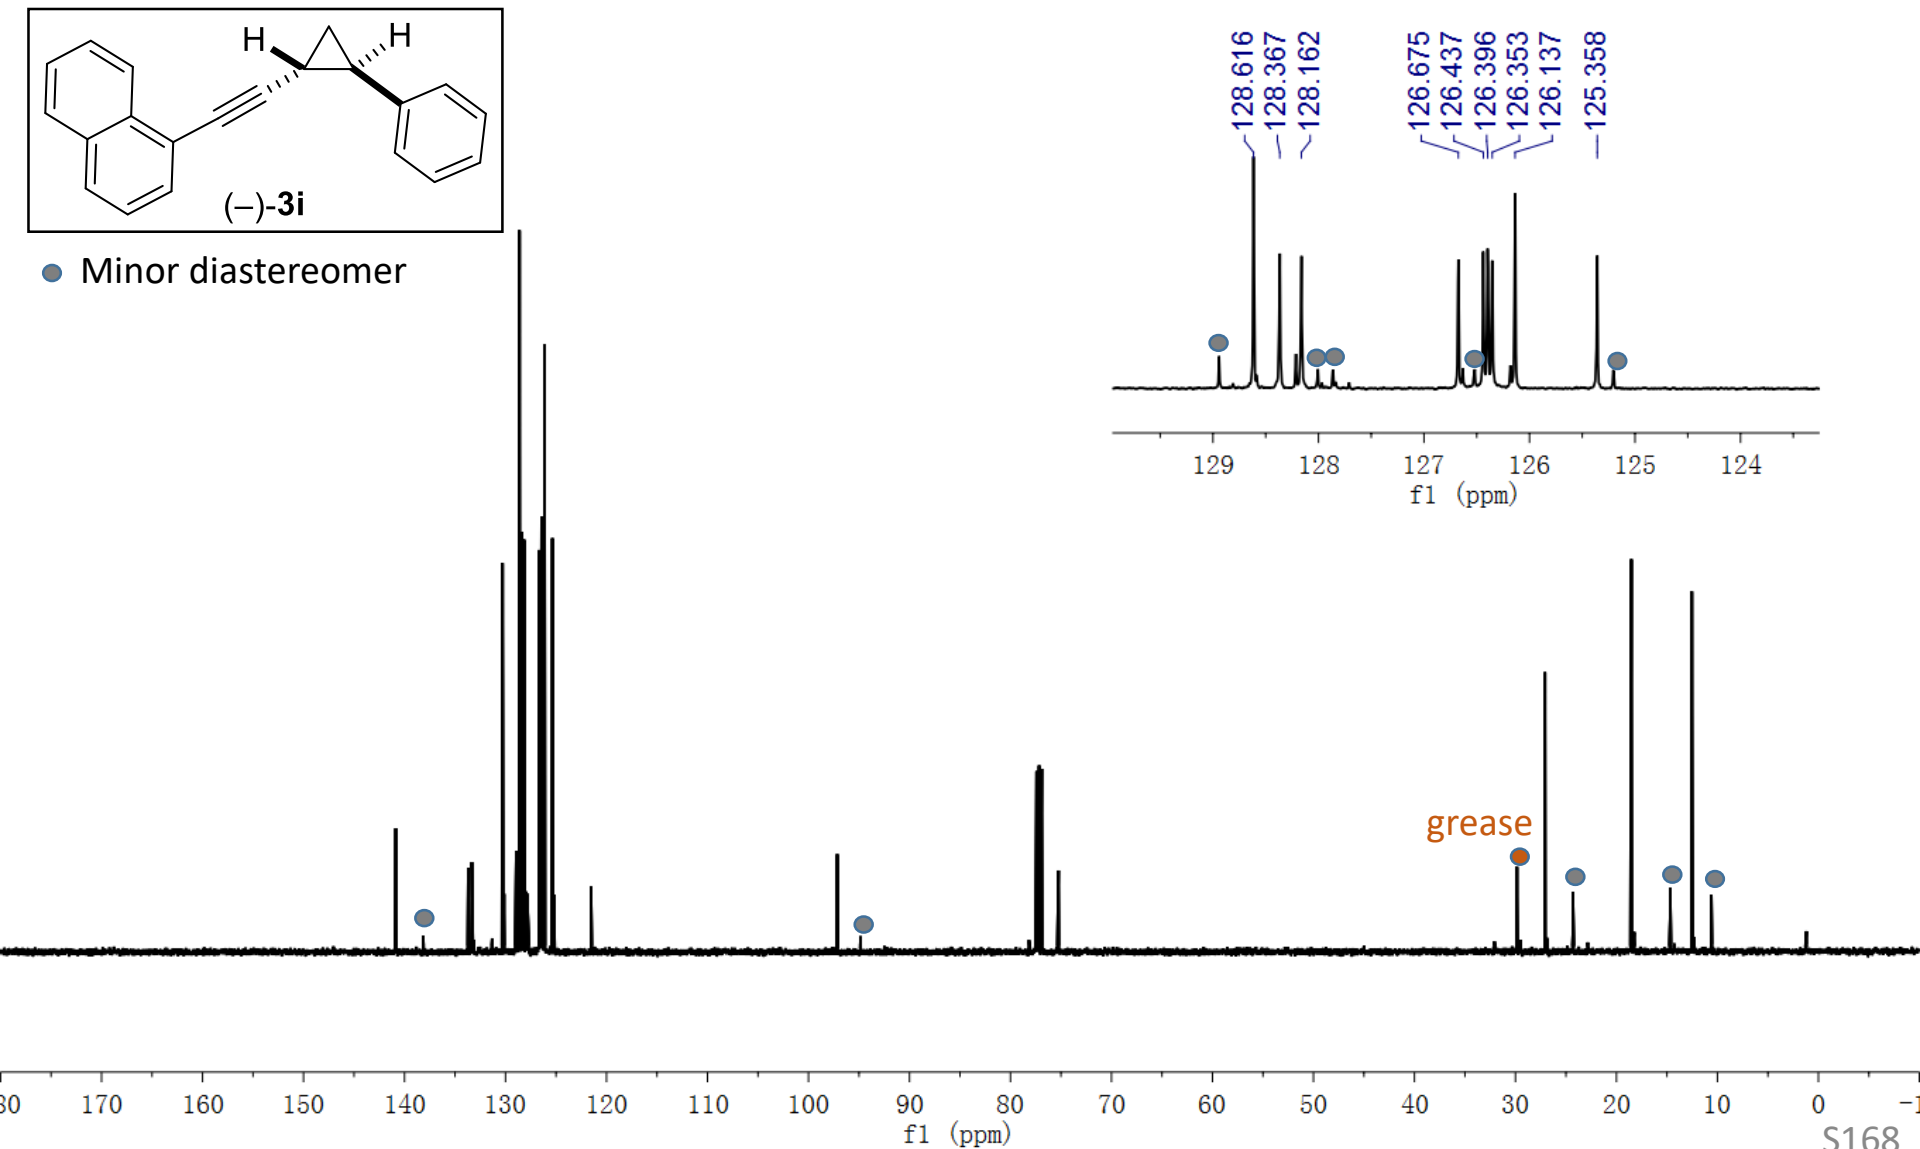



Data File : J0K-0119-IC-0%-0.8ML-isopropanol-solvent004.lcd  
 Sample Name : J0K-0119-IC-0%-0.8ML-isopropanol-solvent004  
 Sample ID : J0K-0119-IC-0%-0.8ML-isopropano  
 Method File : JK-0%-0.8ml.lcm

Chromatogram

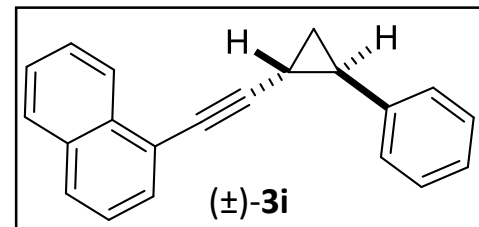

mAU

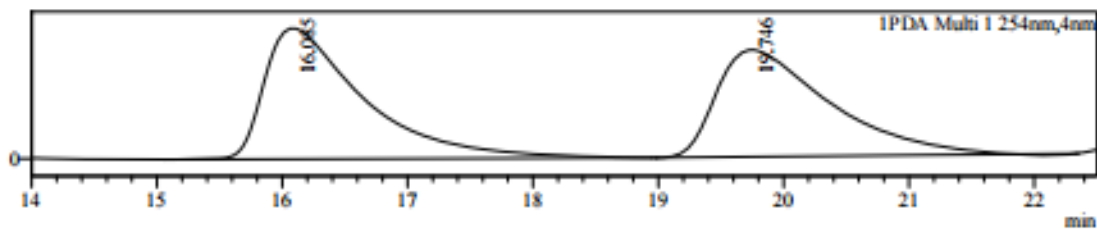

UV Spectrum

Retention time = 16.085

mAU

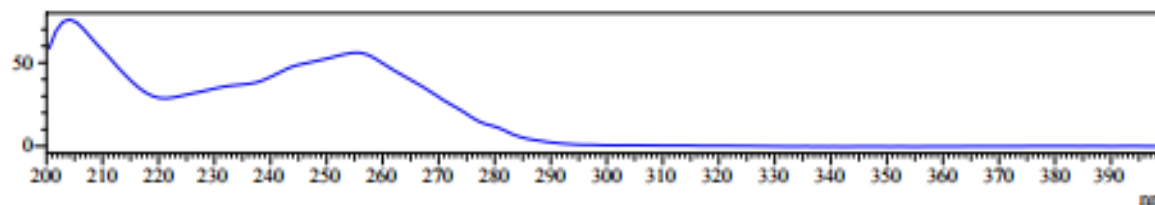

U

Retention time = 19.746

mAU

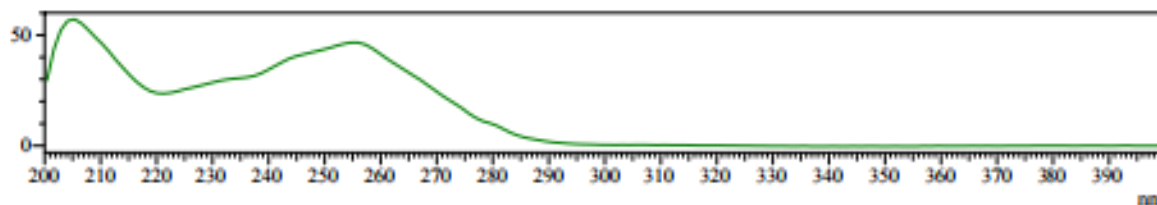

Peak Table

PDA Ch1 254nm

| Peak# | Ret. Time | Area    | Area%   |
|-------|-----------|---------|---------|
| 1     | 16.085    | 3026512 | 51.835  |
| 2     | 19.746    | 2812184 | 48.165  |
| Total |           | 5838697 | 100.000 |

Data File : JOK-0120-1C-0%-0.8ML-isopropanol-solvent005.lcd  
 Sample Name : JOK-0120-1C-0%-0.8ML-isopropanol-solvent005  
 Sample ID : JOK-0120-1C-0%-0.8ML-isopropano  
 Method File : JK-0%-0.8ml.lcm

Chromatogram

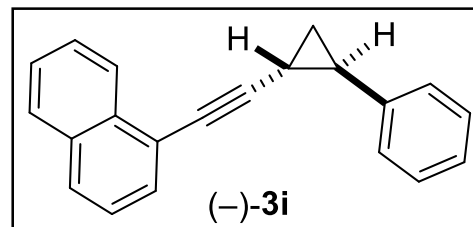

mAU

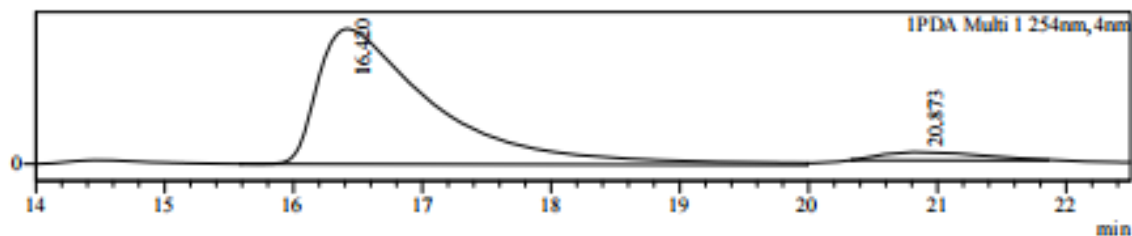

UV Spectrum

Retention time = 16.420

mAU

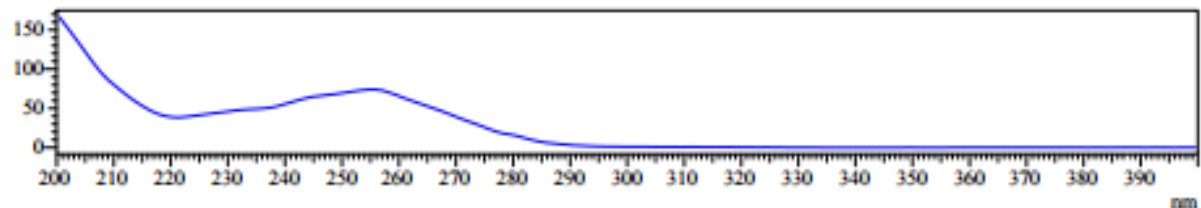

J

Retention time = 20.873

nAU

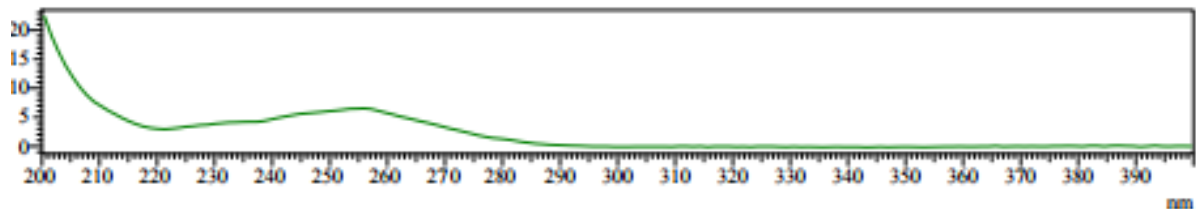

Peak Table

PDA Ch1 254nm

| Peak# | Ret. Time | Area    | Area%   |
|-------|-----------|---------|---------|
| 1     | 16.420    | 4527761 | 95.035  |
| 2     | 20.873    | 236566  | 4.965   |
| Total |           | 4764327 | 100.000 |

<sup>1</sup>H NMR of **3j**, 500 MHz, CDCl<sub>3</sub>

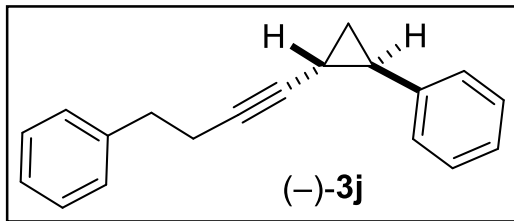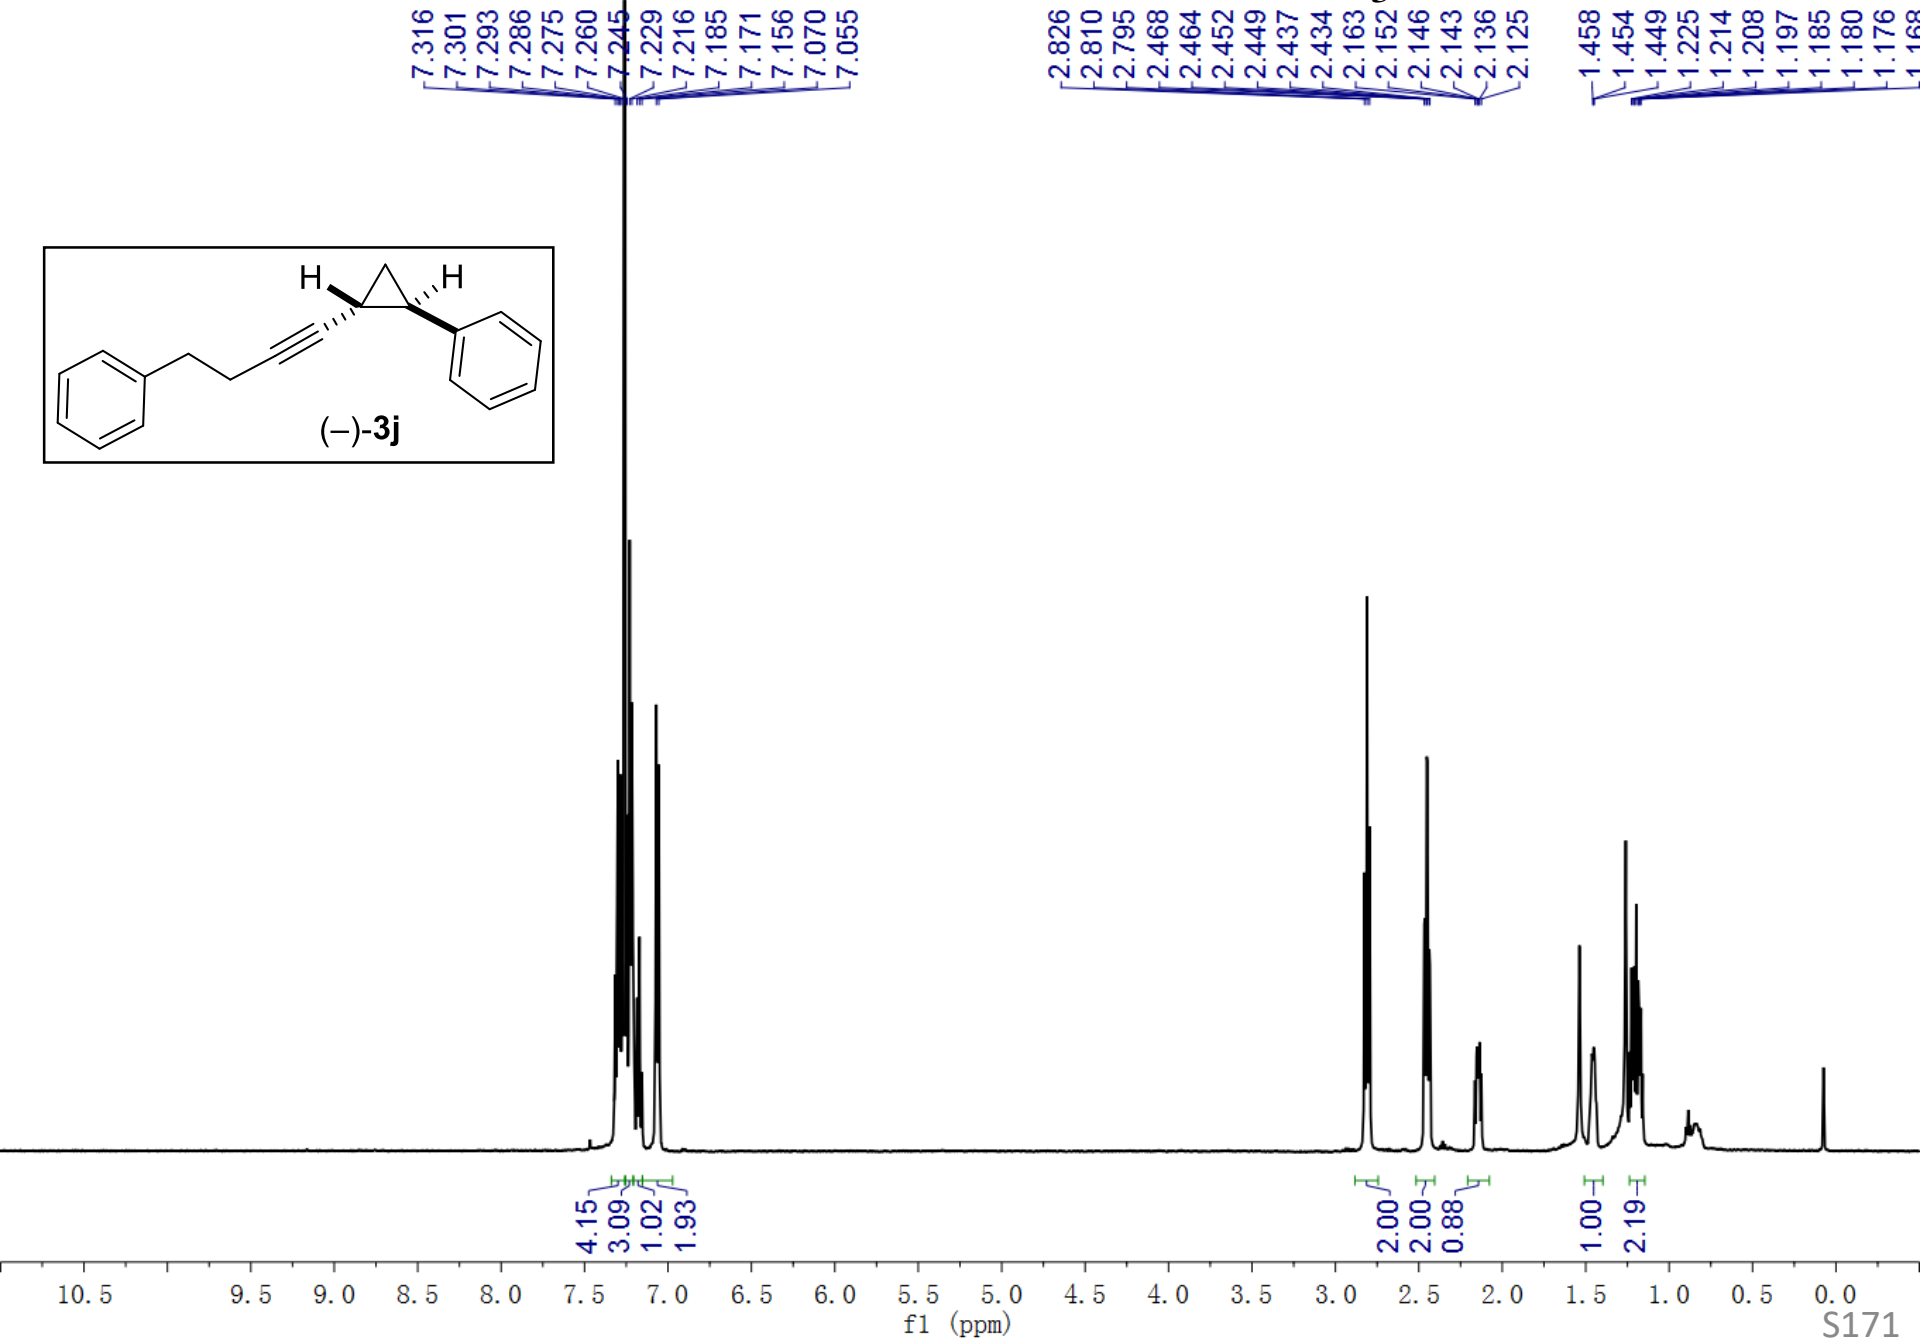

$^{13}\text{C}$  NMR of **3j**, 151 MHz,  $\text{CDCl}_3$

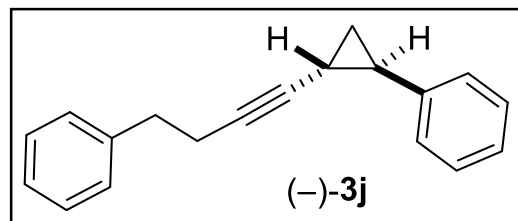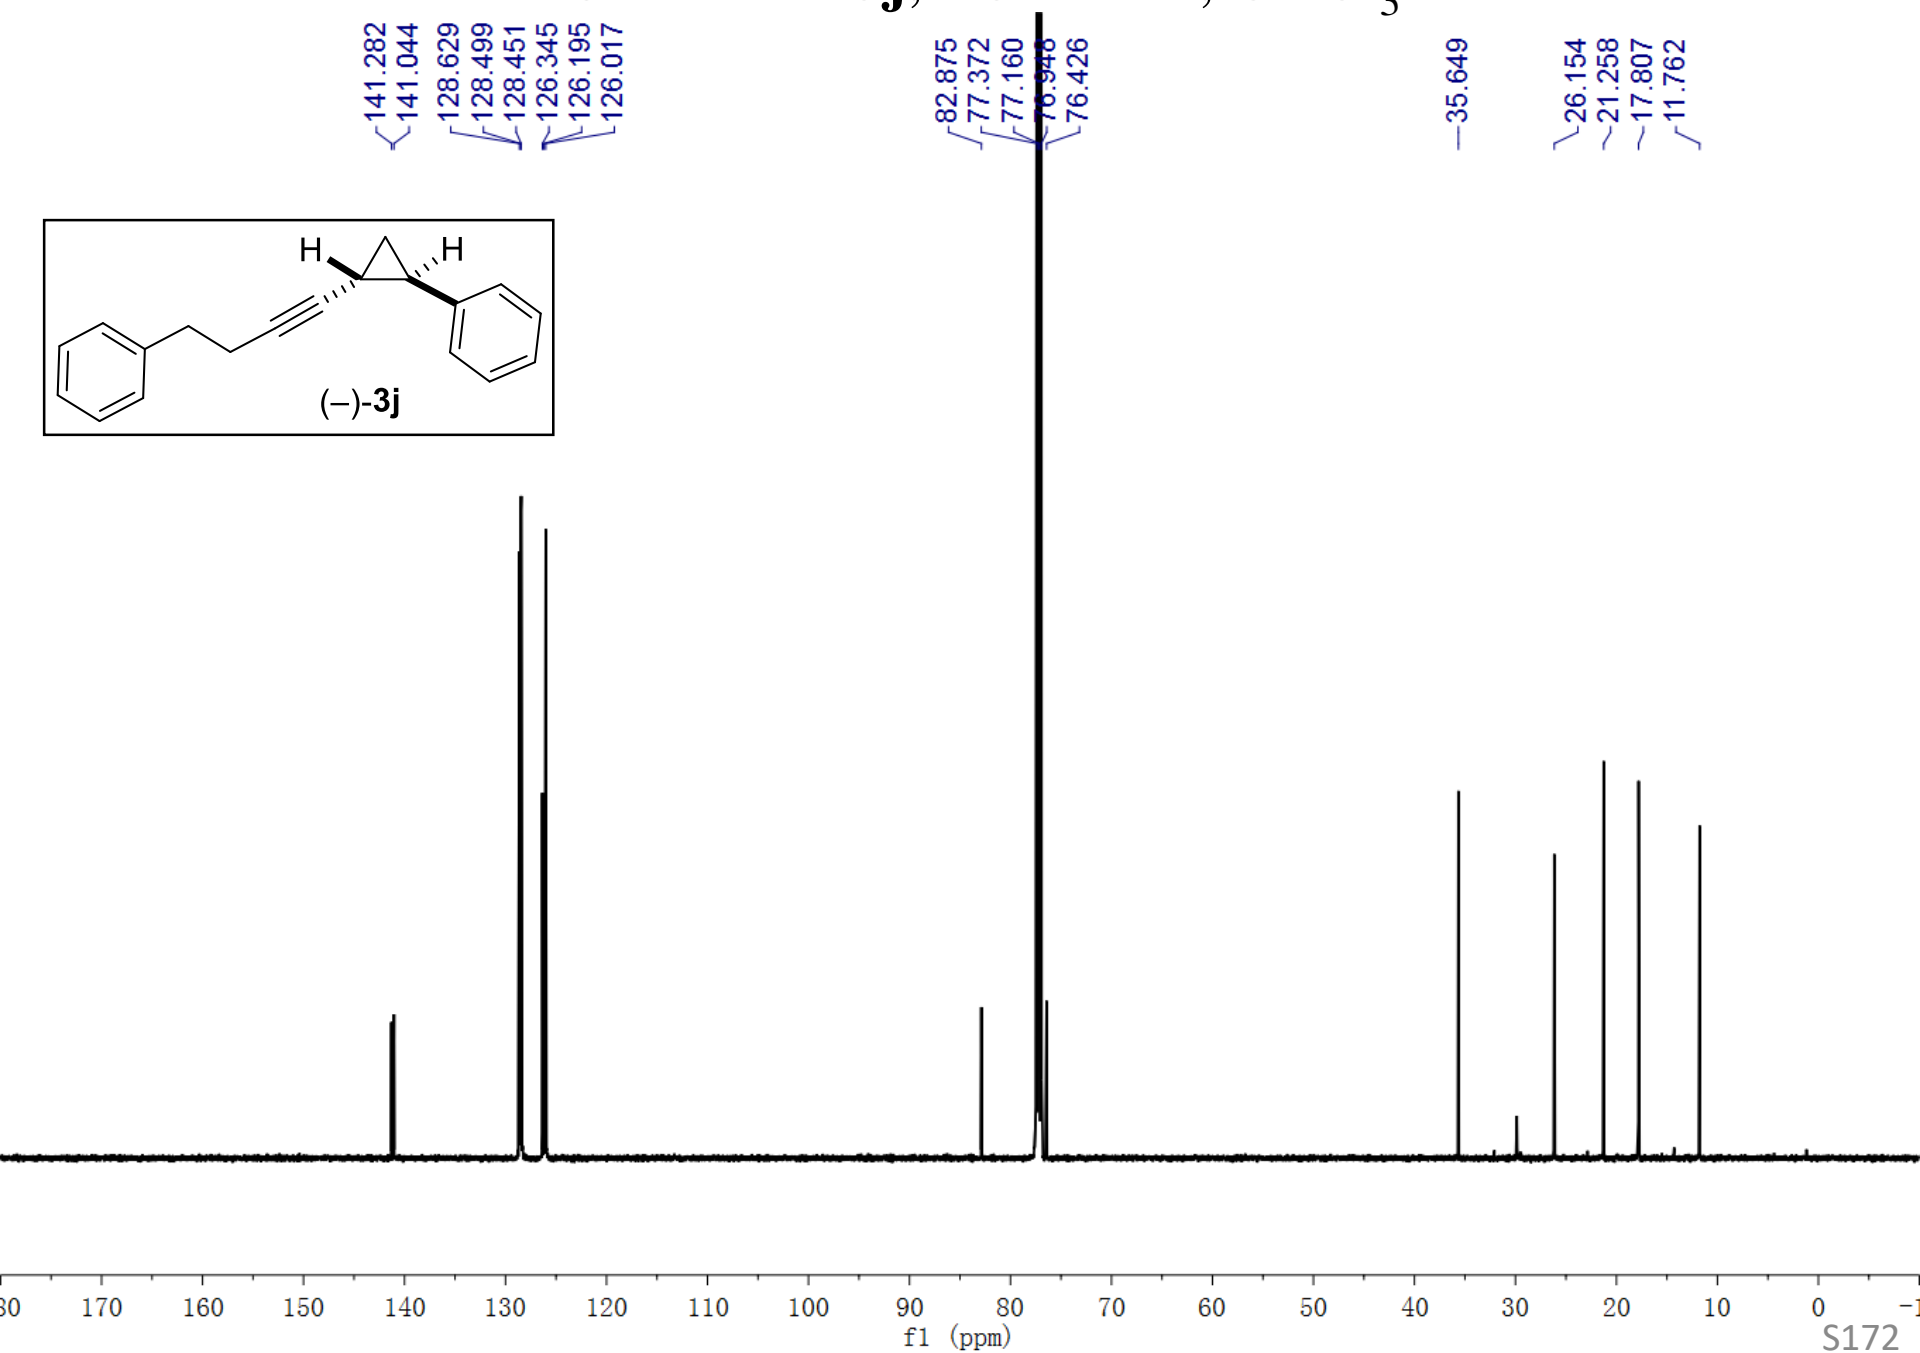

# ==== Shimadzu LabSolutions Analysis Report ====

WCL-1844-2-IC-0.1%0.8mL  
WCL-0.1%-20min0.8mL.lcm

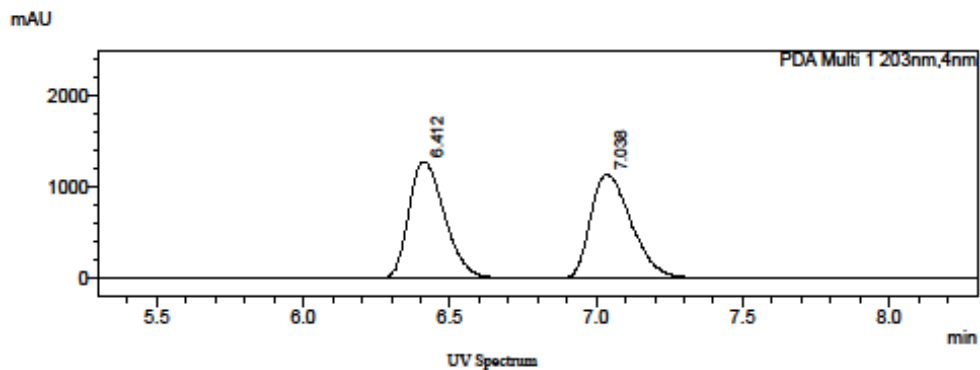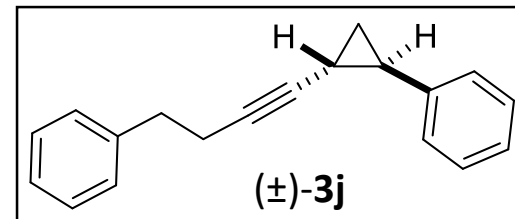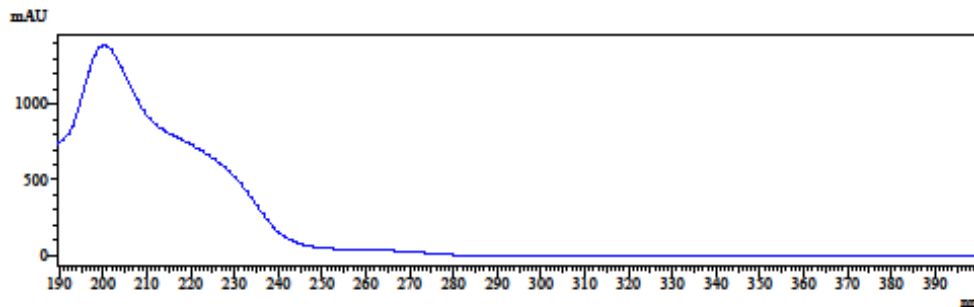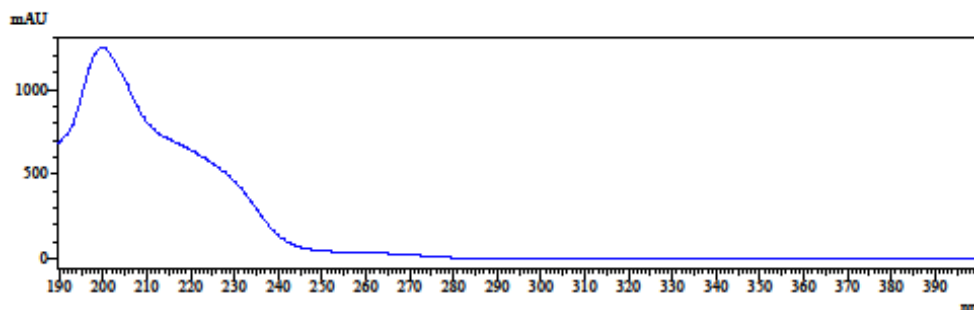

Peak Table

PDA Ch1 203nm

| Peak# | Ret. Time | Area%   |
|-------|-----------|---------|
| 1     | 6.412     | 49.969  |
| 2     | 7.038     | 50.031  |
| Total |           | 100.000 |

# ==== Shimadzu LabSolutions Analysis Report ====

WCL-1845-1-IC-0.1%0.8mL  
WCL-0.1%-20min0.8mL.lcm

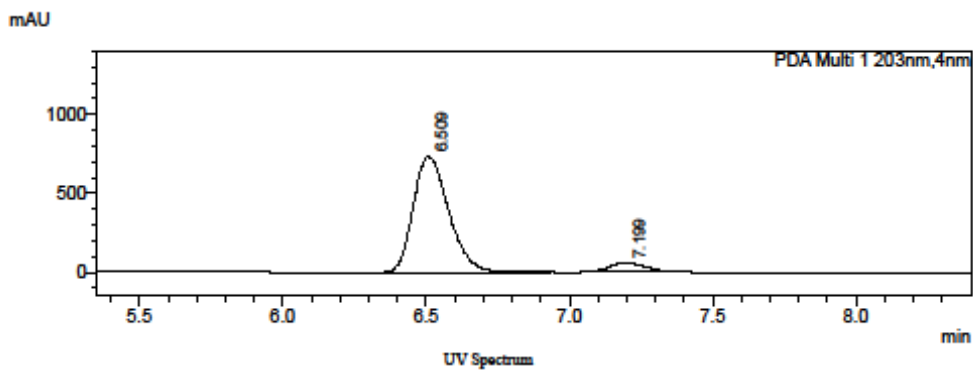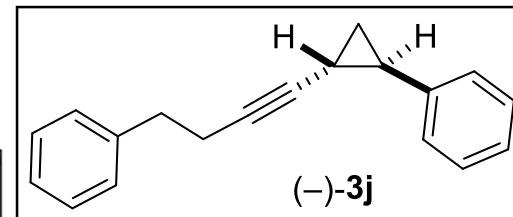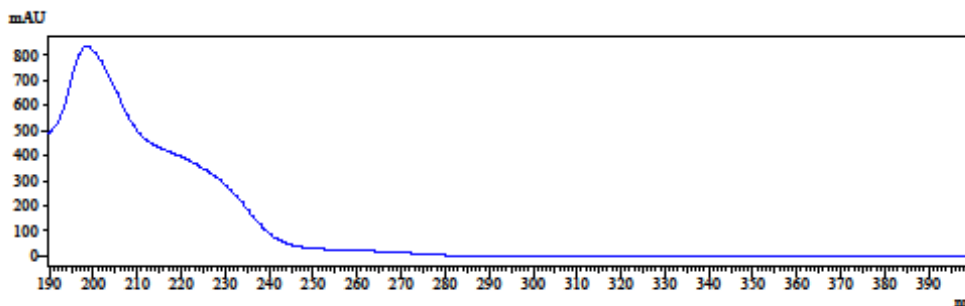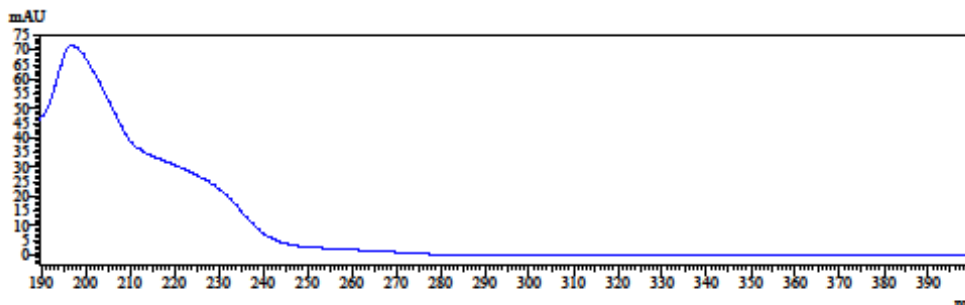

Peak Table

PDA Ch1 203nm

| Peak# | Ret. Time | Area%   |
|-------|-----------|---------|
| 1     | 6.509     | 92.506  |
| 2     | 7.199     | 7.494   |
| Total |           | 100.000 |

# $^1\text{H}$ NMR of **3k**, 600 MHz, $\text{CDCl}_3$

7.284  
7.269  
7.260  
7.253  
7.195  
7.181  
7.166  
7.085  
7.071

2.267  
2.258  
2.255  
2.250  
2.246  
2.241  
2.238  
2.228

1.563  
1.554  
1.332  
1.315  
1.262  
1.250  
1.086  
1.080  
1.075  
1.065  
1.052  
1.043

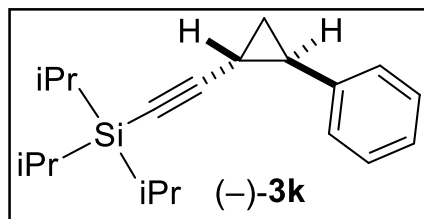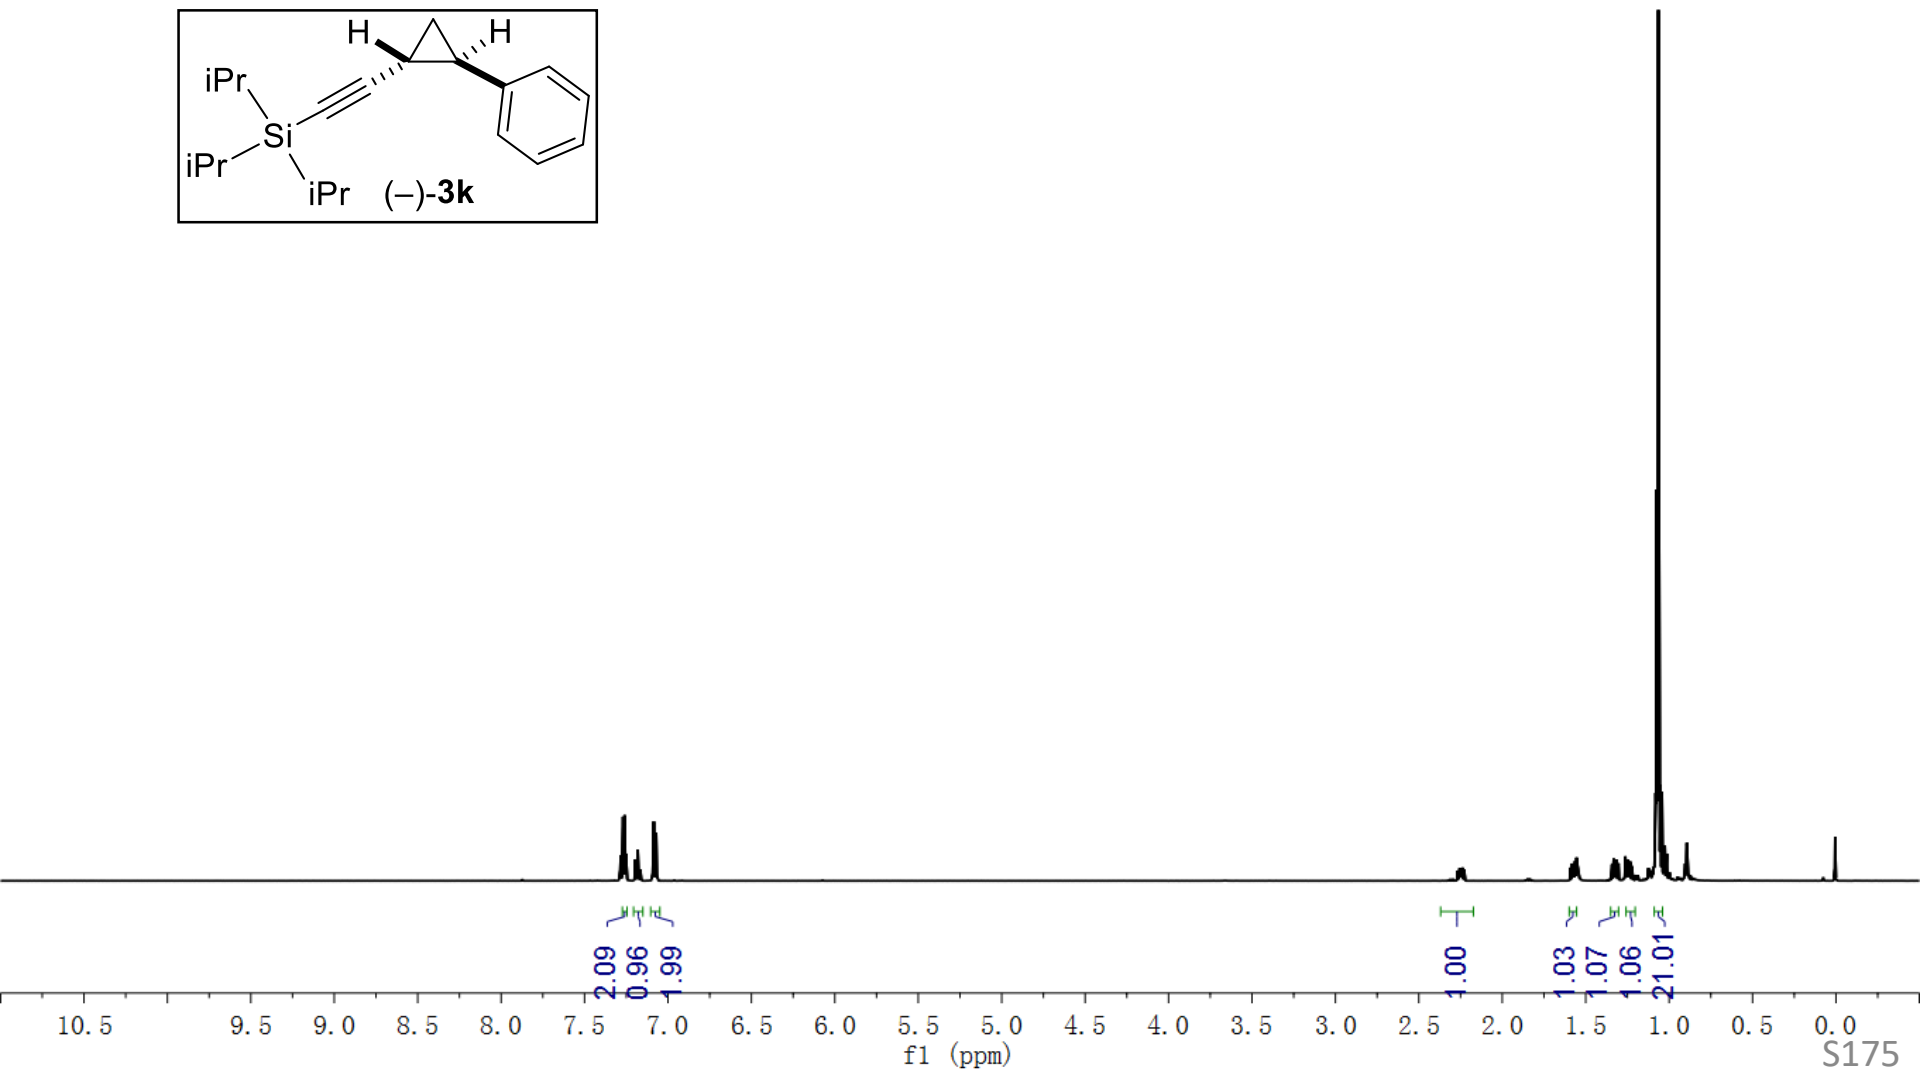

$^{13}\text{C}$  NMR of **3j**, 151 MHz,  $\text{CDCl}_3$

—141.010

128.536

126.325

126.016

—110.698

77.372

77.160

76.948

76.903

—27.077

18.794

18.734

12.564

11.474

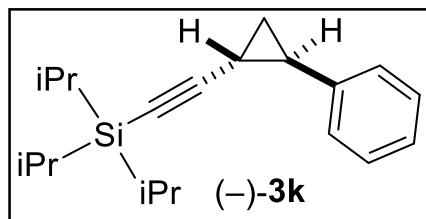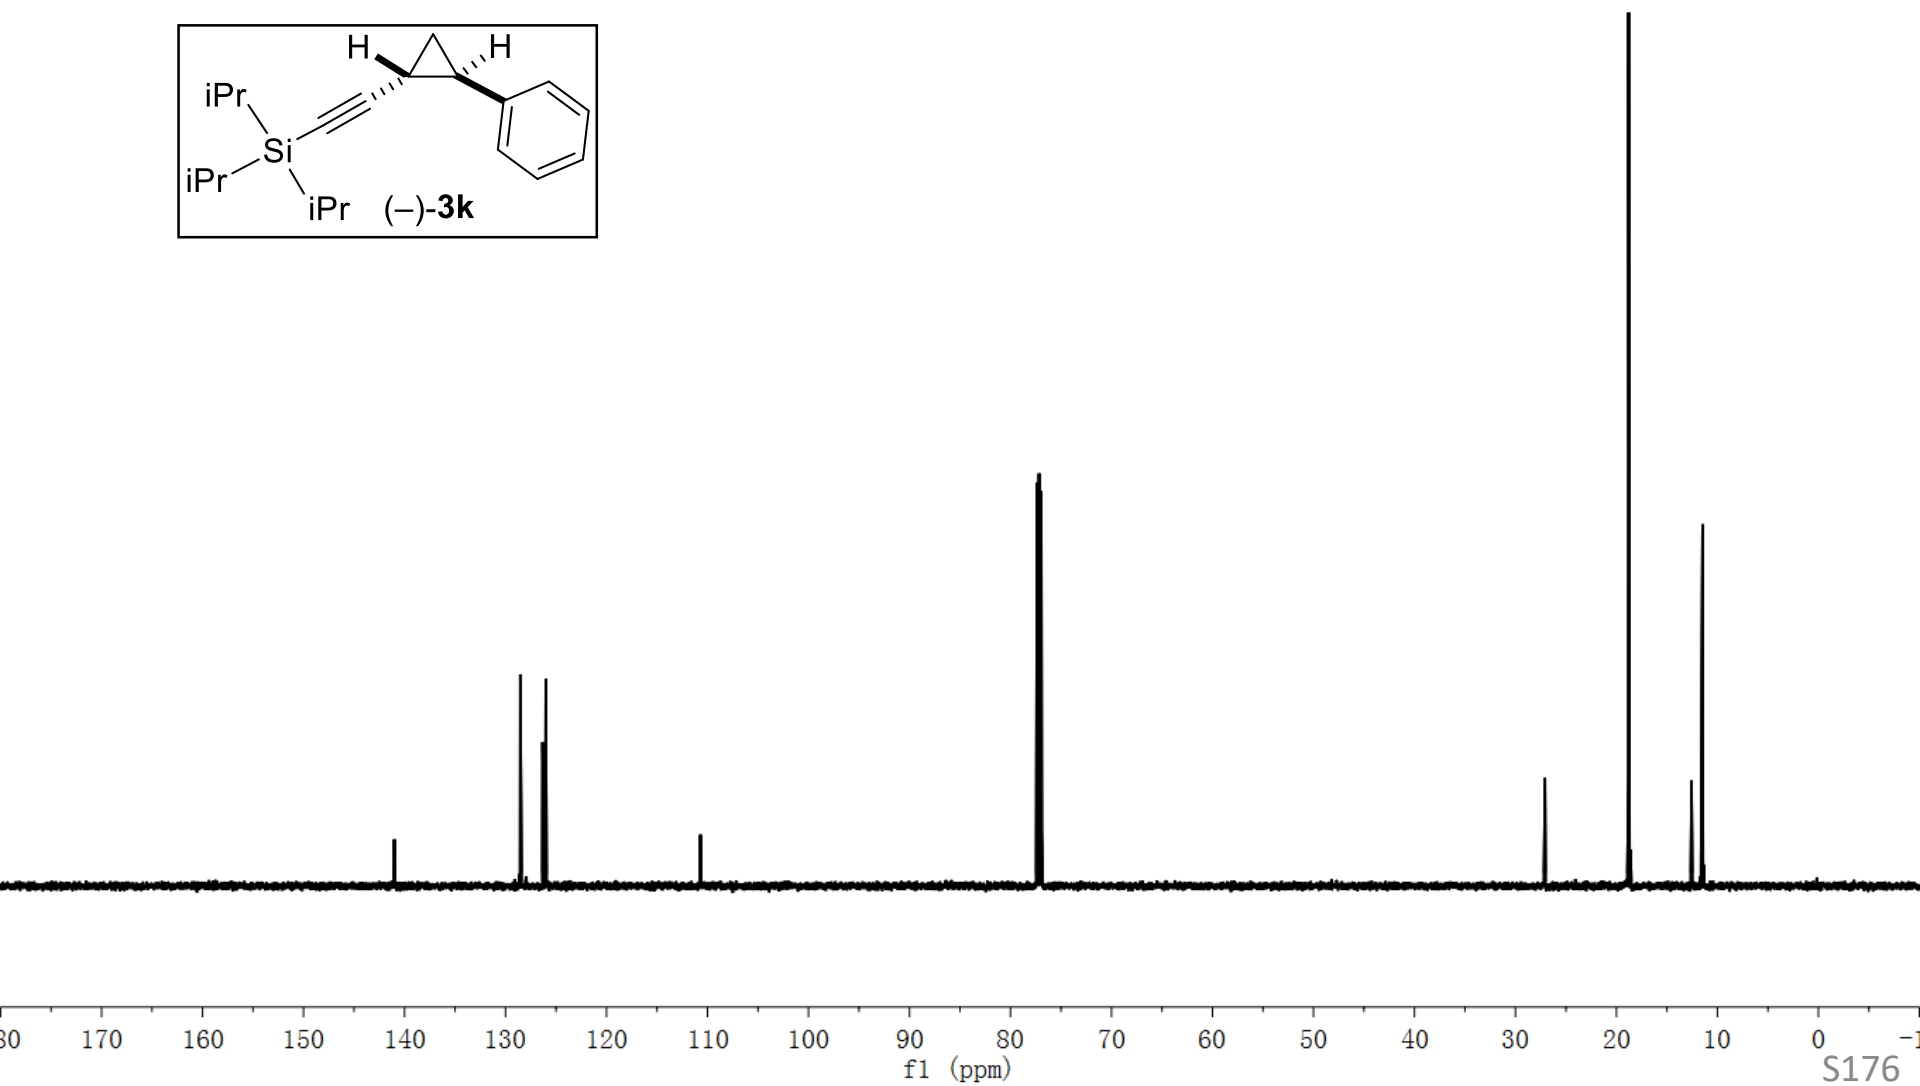



Data File : J0K-1401-IC-0%-0.8ML001.lcd  
 Sample Name : J0K-1401-IC-0%-0.8ML  
 Sample ID : J0K-1401-IC-0%-0.8ML  
 Method File : J0K-0%-25min-0.6ml.lcm  
 Chromatogram

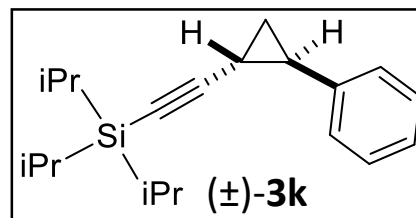

AU

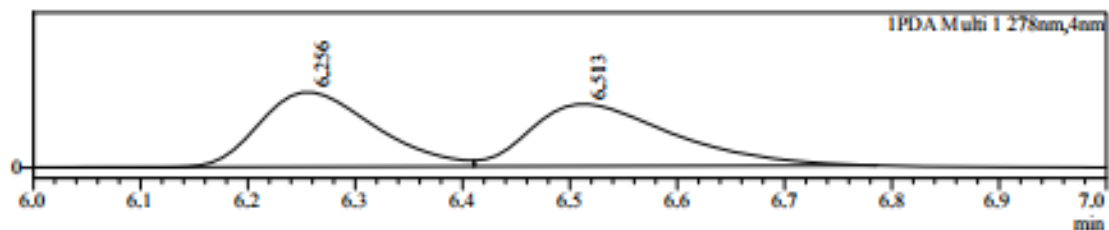

UV Spectrum  
 Retention time = 6.256

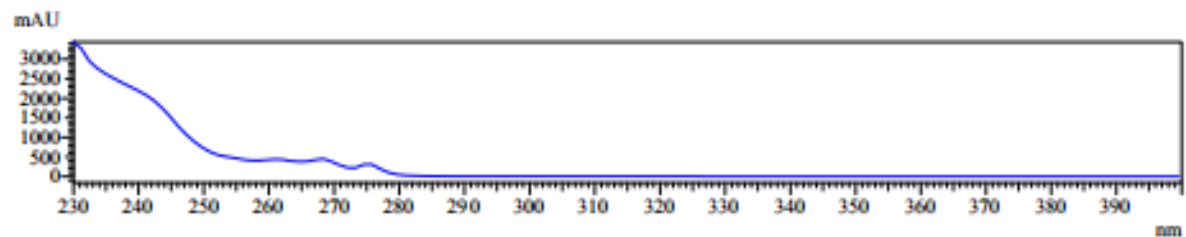

UV Spectrum  
 Retention time = 6.513

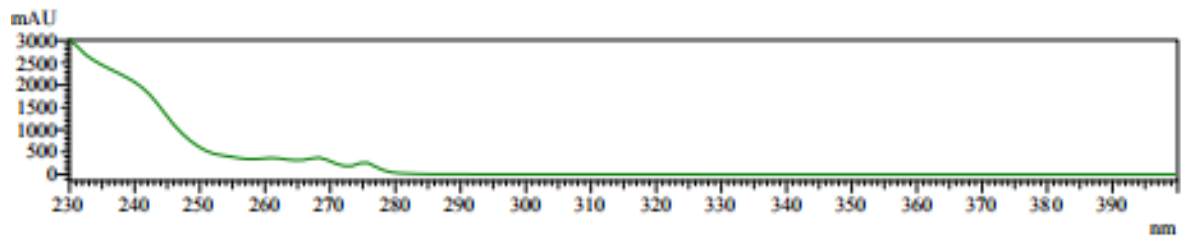

Peak Table

| PDA Ch1 278nm |           |         |         |
|---------------|-----------|---------|---------|
| Peak#         | Ret. Time | Area    | Area%   |
| 1             | 6.256     | 1083124 | 49.482  |
| 2             | 6.513     | 1105802 | 50.518  |
| Total         |           | 2188926 | 100.000 |

Data File : J0K-1402-IC-0%-0.8ML-3.Icd  
 Sample Name : J0K-1402-IC-0%-0.8ML-3  
 Sample ID : J0K-1402-IC-0%-0.8ML-3  
 Method File : J0K-0%-25min-0.6ml.lcm  
 Chromatogram

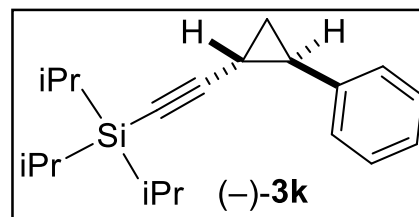

AU

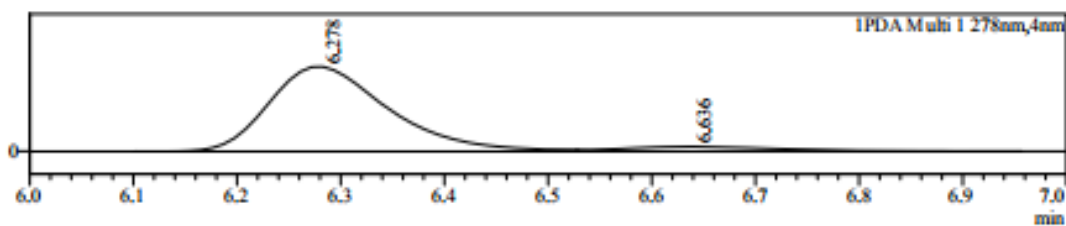

UV Spectrum  
 Retention time = 6.278

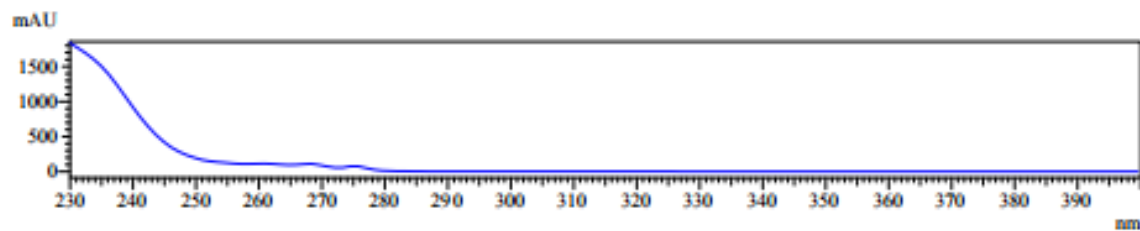

UV Spectrum  
 Retention time = 6.636

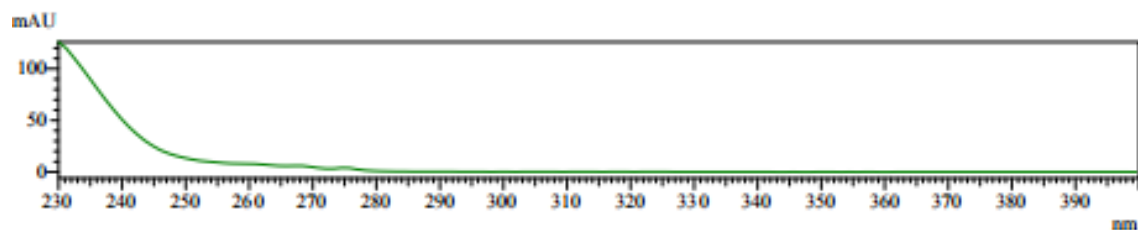

Peak Table

PDA Ch1 278nm

| Peak# | Ret. Time | Area   | Area%   |
|-------|-----------|--------|---------|
| 1     | 6.278     | 296817 | 93.309  |
| 2     | 6.636     | 21284  | 6.691   |
| Total |           | 318101 | 100.000 |

# $^1\text{H}$ NMR of **3I**, 600 MHz, $\text{CDCl}_3$

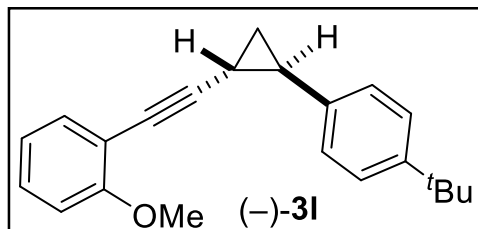

● Minor diastereomer

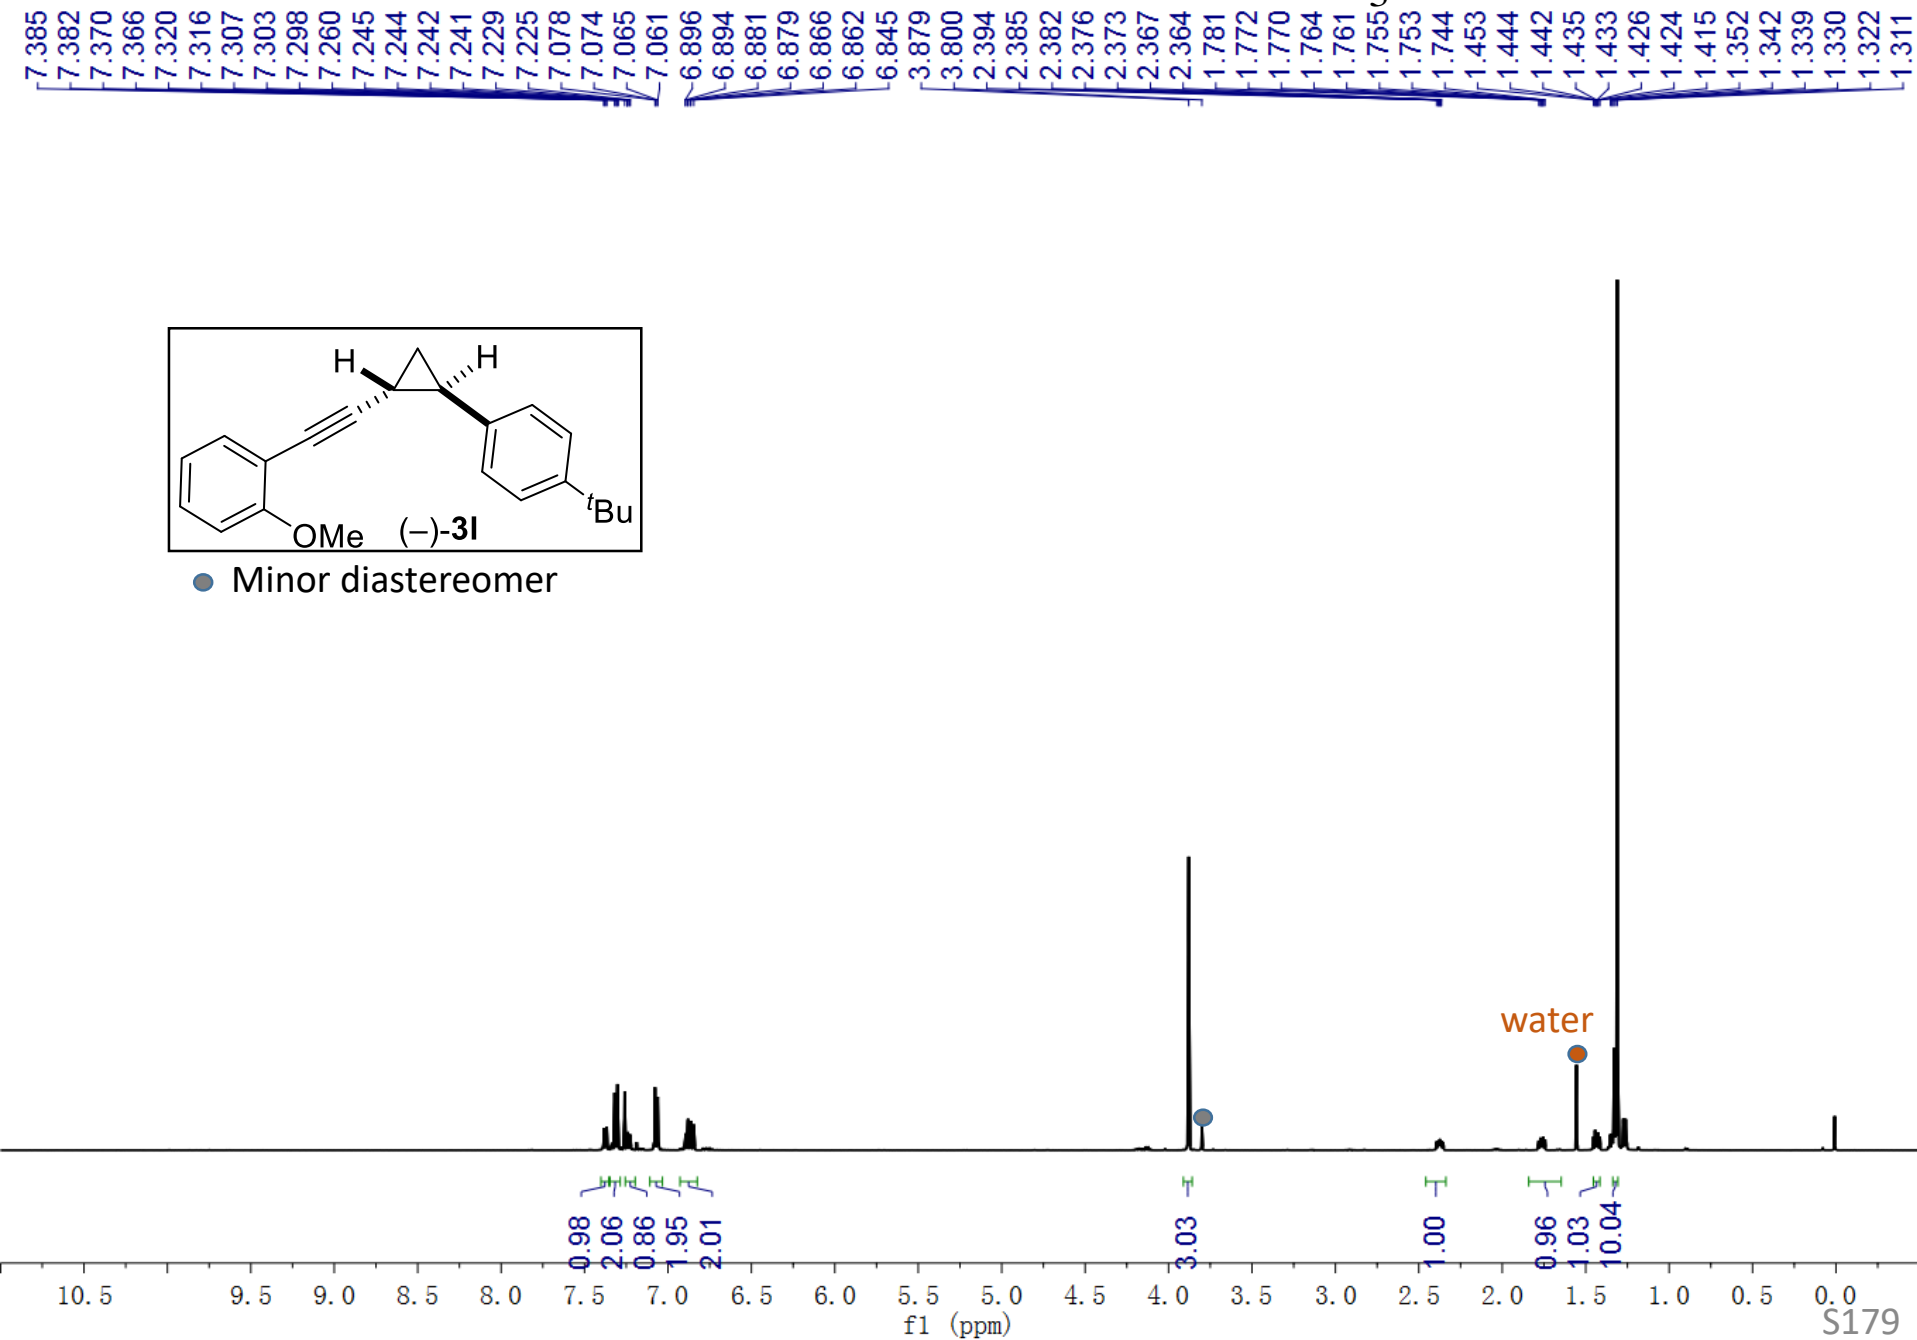

$^{13}\text{C}$  NMR of **3I**, 151 MHz,  $\text{CDCl}_3$

— 160.142  
— 149.259  
~ 137.986  
~ 133.826  
~ 129.087  
~ 125.850  
~ 125.439  
~ 120.527  
~ 113.006  
~ 110.671  
— 96.401  
77.372  
77.160  
76.948  
73.114  
— 55.910  
~ 34.543  
~ 31.503  
~ 26.496  
— 18.301  
— 12.416



● Minor diastereomer

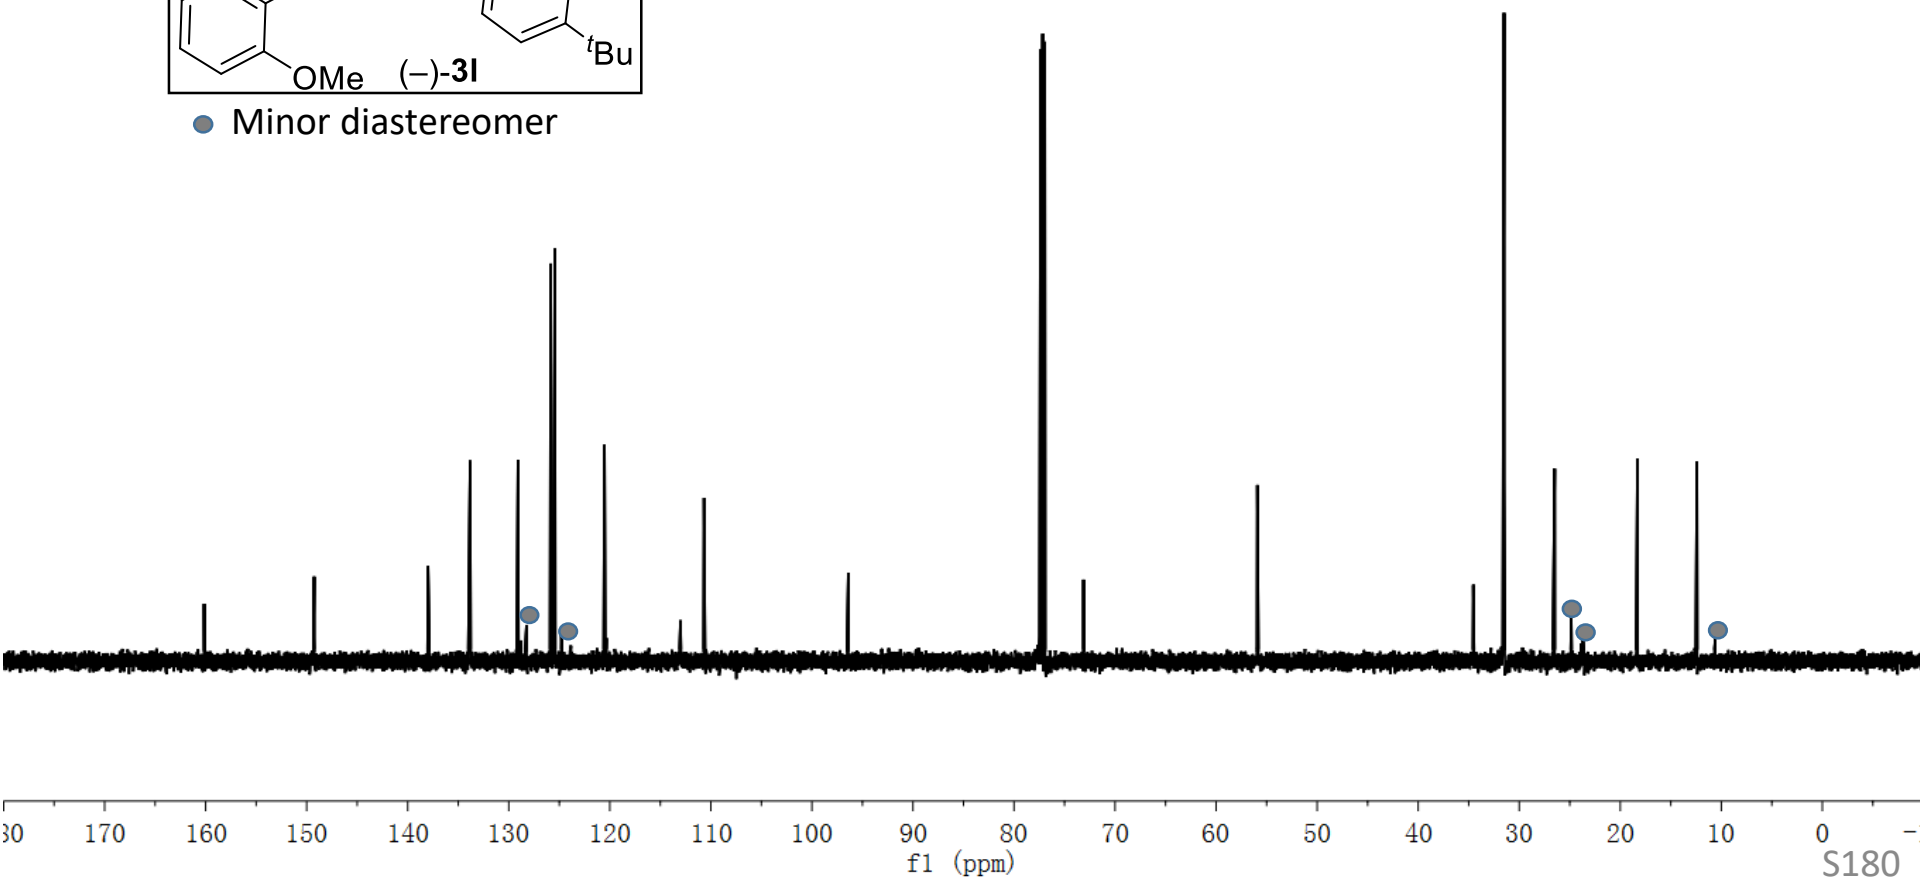

Data File : J0K-0169-2-IC-1%-0.8ML-isopropanol-solvent003.kcd  
 Sample Name : J0K-0169-2-IC-1%-0.8ML-isopropanol-solvent003  
 Sample ID : J0K-0169-2-IC-1%-0.8ML-isopropa  
 Method File : J0K-1%-0.8ml.kcm

Chromatogram

AU

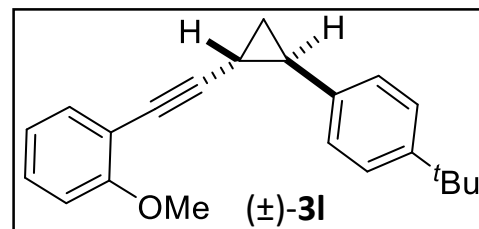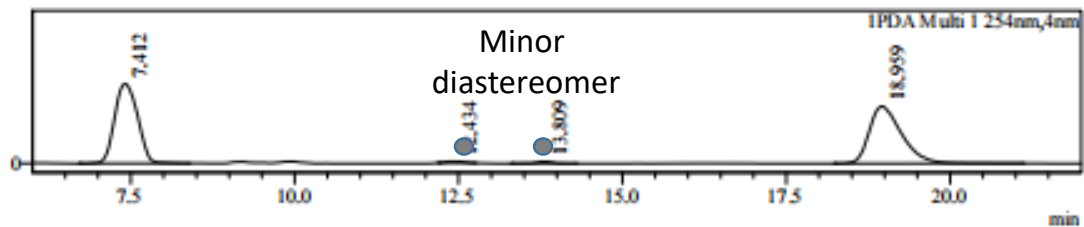

UV Spectrum  
Retention time = 7.412

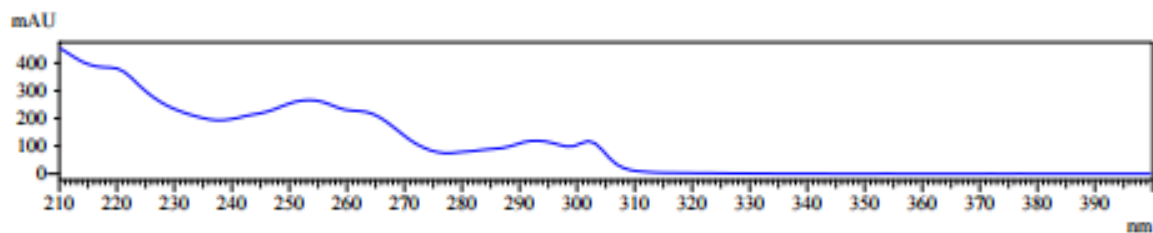

U  
Retention time = 12.434

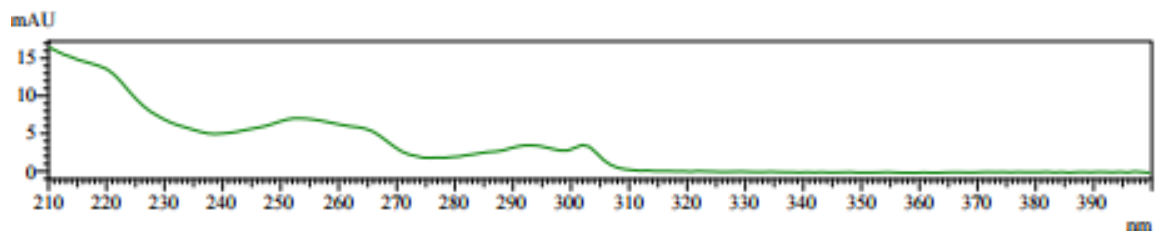

Peak Table

| PDA Ch1 254nm |           |          |         |
|---------------|-----------|----------|---------|
| Peak#         | Ret. Time | Area     | Area%   |
| 1             | 7.412     | 6343268  | 49.007  |
| 2             | 12.434    | 99943    | 0.772   |
| 3             | 13.809    | 101856   | 0.787   |
| 4             | 18.959    | 6398503  | 49.434  |
| Total         |           | 12943570 | 100.000 |

Data File : JOK-0170-IC-1%-0.8ML-isopropanol-solvent003.lcd  
 Sample Name : JOK-0170-IC-1%-0.8ML-isopropanol-solvent003  
 Sample ID : JOK-0170-IC-1%-0.8ML-iso propano  
 Method File : JOK-1%-0.8ml.lcm

Chromatogram

AU

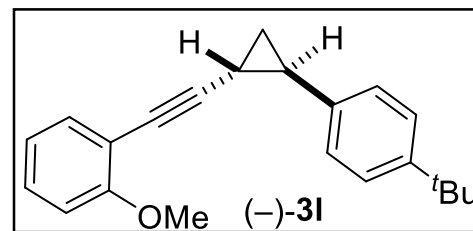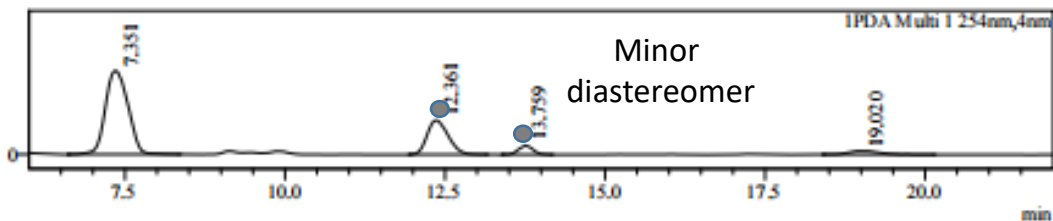

UV Spectrum  
 Retention time = 7.351

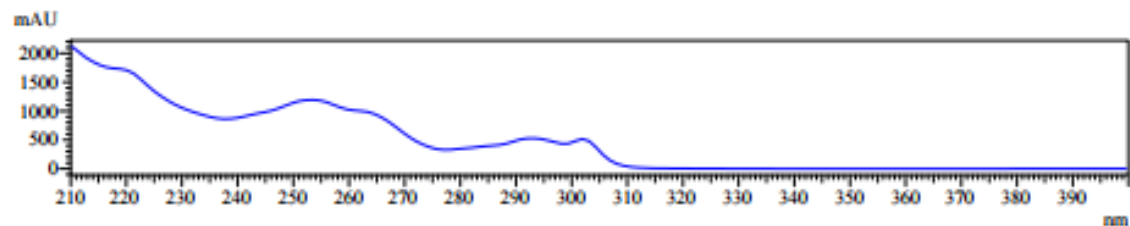

U  
 Retention time = 12.361

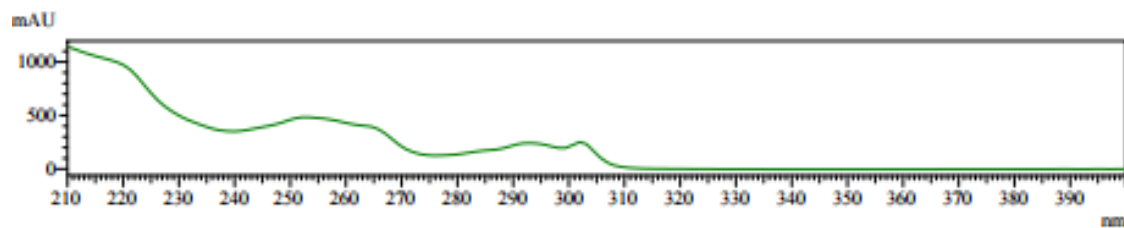

Peak Table

| Peak# | Ret. Time | Area     | Area%   |
|-------|-----------|----------|---------|
| 1     | 7.351     | 28725643 | 66.428  |
| 2     | 12.361    | 10836399 | 25.059  |
| 3     | 13.759    | 1966955  | 4.549   |
| 4     | 19.020    | 1714331  | 3.964   |
| Total |           | 43243327 | 100.000 |

# $^1\text{H}$ NMR of **3m**, 500 MHz, $\text{CDCl}_3$

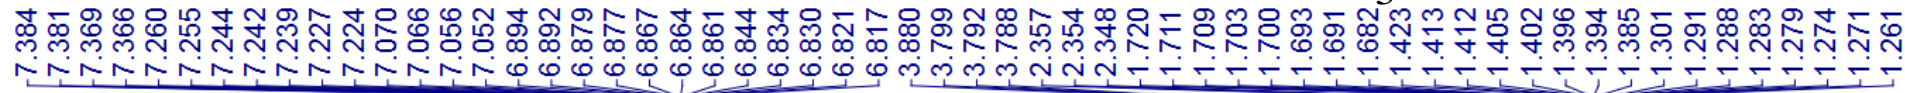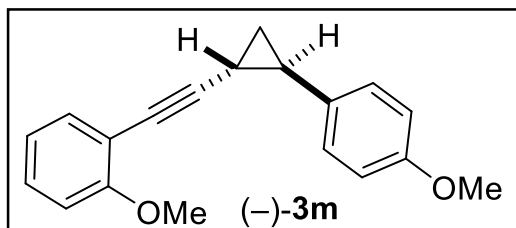

● Minor diastereomer

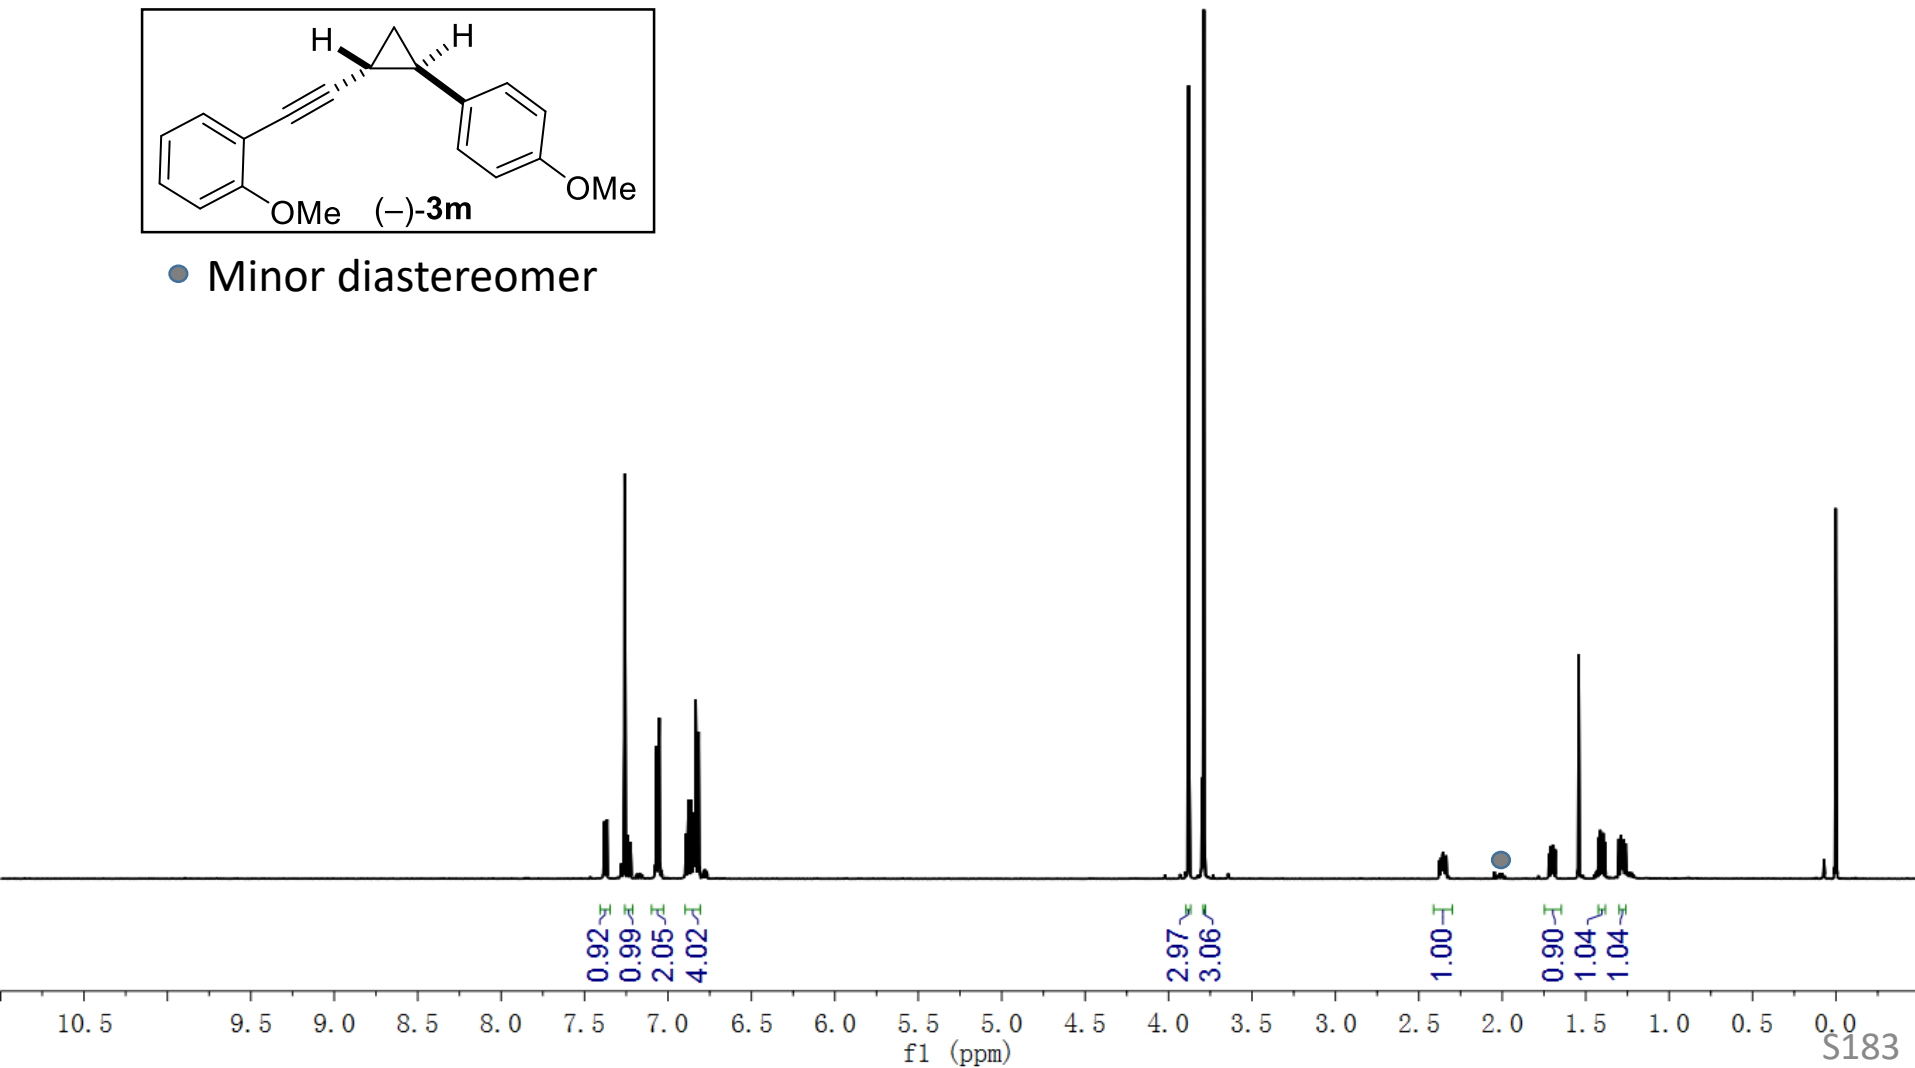

$^{13}\text{C}$  NMR of **3m**, 126 MHz,  $\text{CDCl}_3$

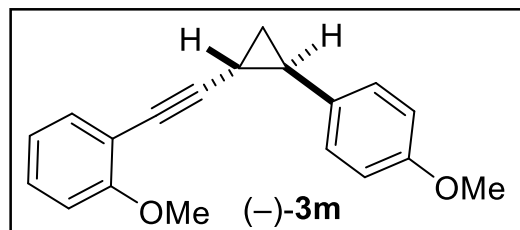

● Minor diastereomer

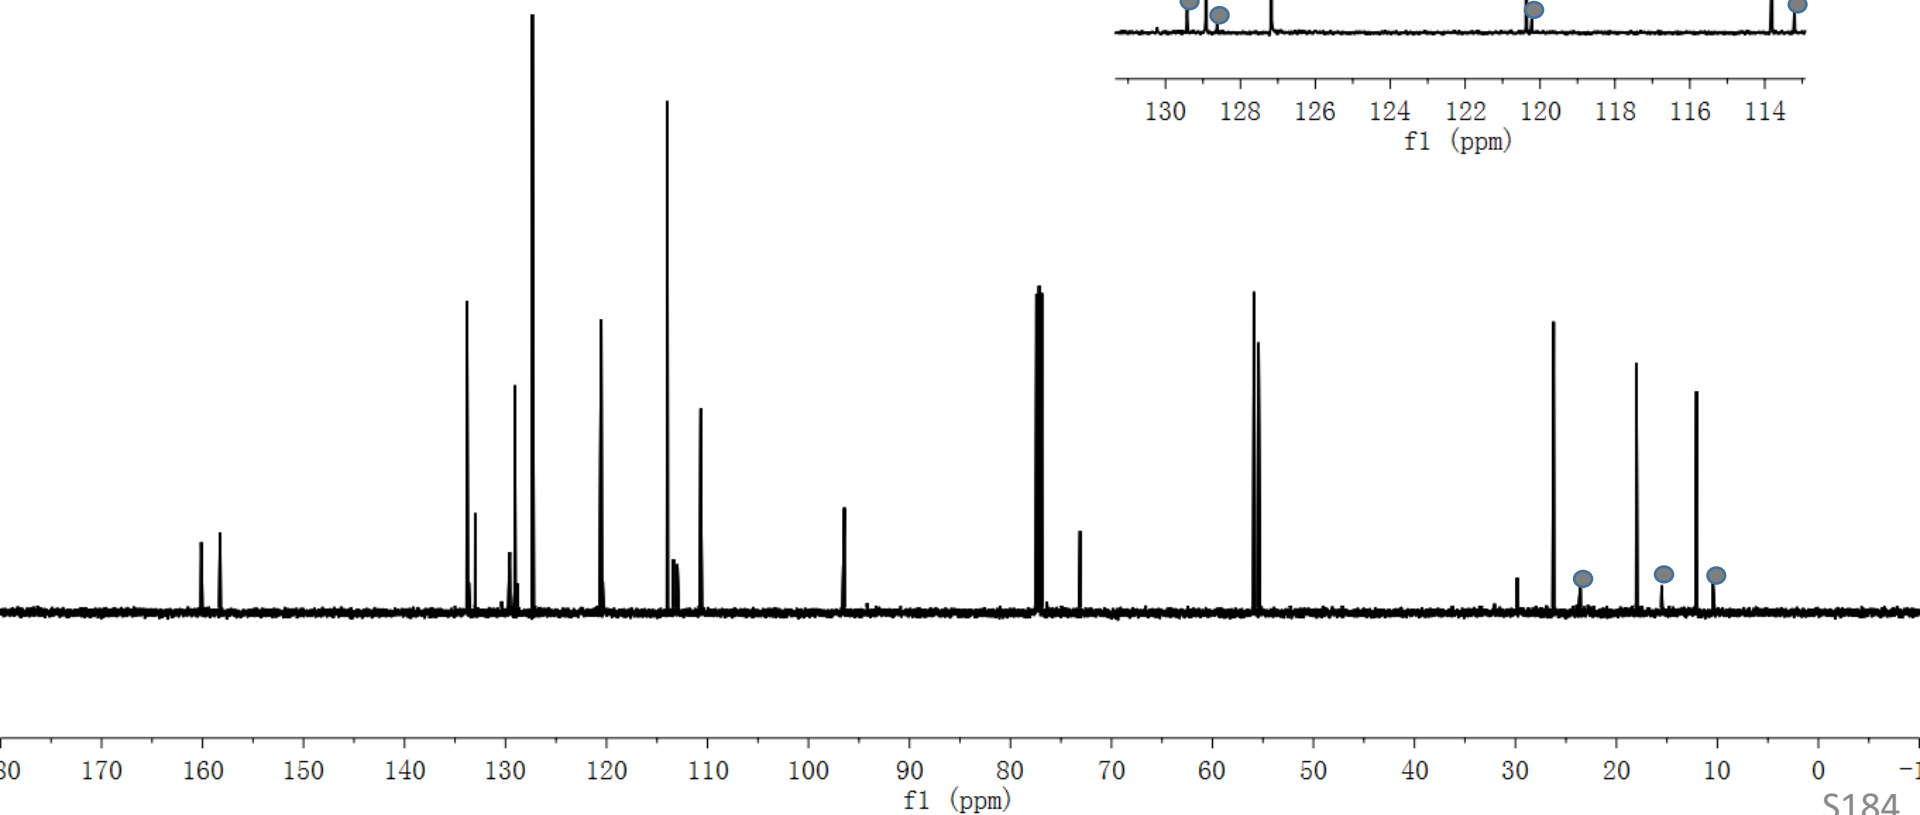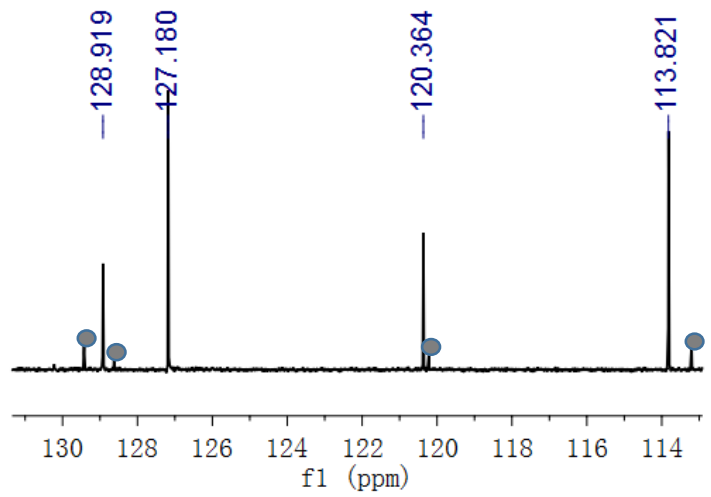



Data File : J0K-0171-IC-2%-0.8ML-isopropanol-solvent004.lcd  
 Sample Name : J0K-0171-IC-2%-0.8ML-isopropanol-solvent004  
 Sample ID : J0K-0171-IC-2%-0.8ML-isopropano  
 Method File : J0K-2%-0.8ml.lcm

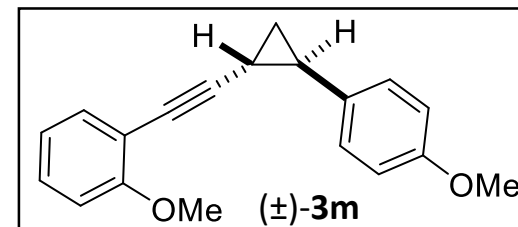

Chromatogram

mAU

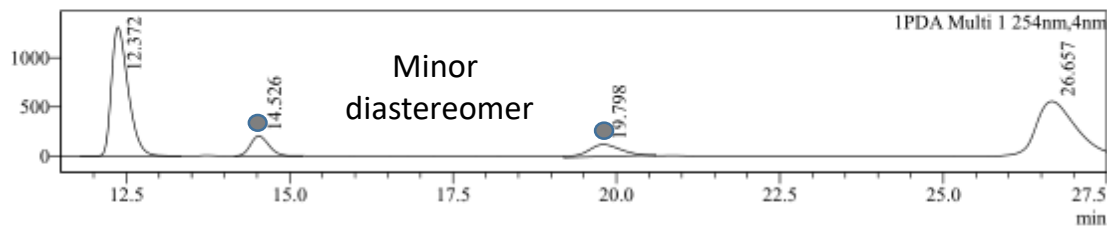

UV Spectrum  
Retention time = 12.372

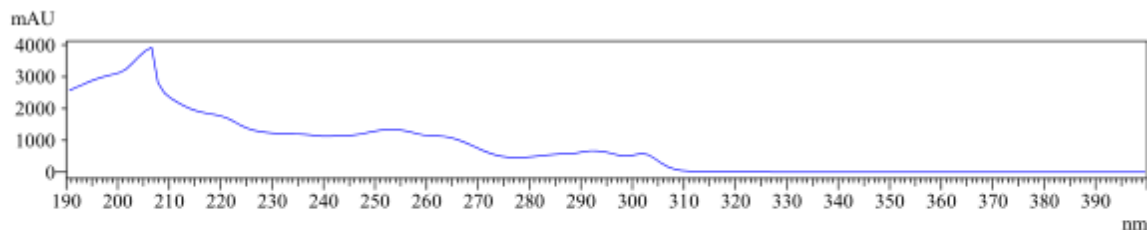

UV Spectrum  
Retention time = 26.657

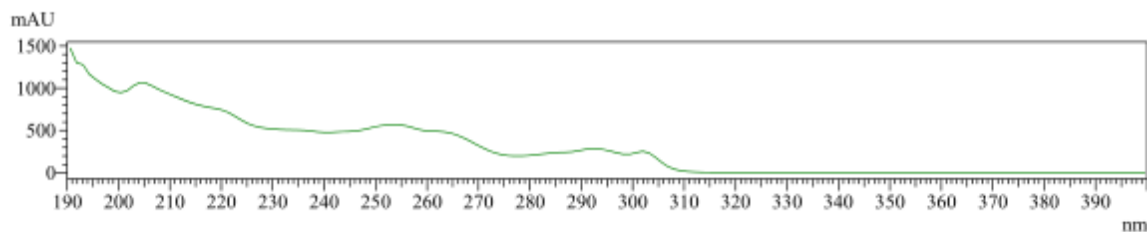

Peak Table

PDA Ch1 254nm

| Peak# | Ret. Time | Area     | Area%   |
|-------|-----------|----------|---------|
| 1     | 12.372    | 23278478 | 41.919  |
| 2     | 14.526    | 4205933  | 7.574   |
| 3     | 19.798    | 4184760  | 7.536   |
| 4     | 26.657    | 23862693 | 42.971  |
| Total |           | 55531864 | 100.000 |

Data File : J0K-0172-IC-2%-0.8ML-isopropanol-solvent004.lcd  
 Sample Name : J0K-0172-IC-2%-0.8ML-isopropanol-solvent004  
 Sample ID : J0K-0172-IC-2%-0.8ML-isopropano  
 Method File : J0K-2%-0.8ml.lcm

Chromatogram

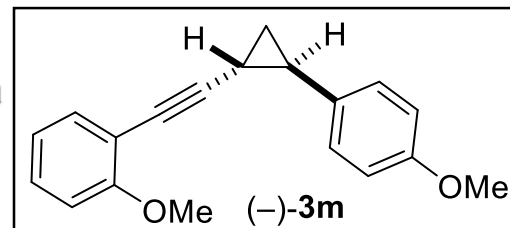

mAU

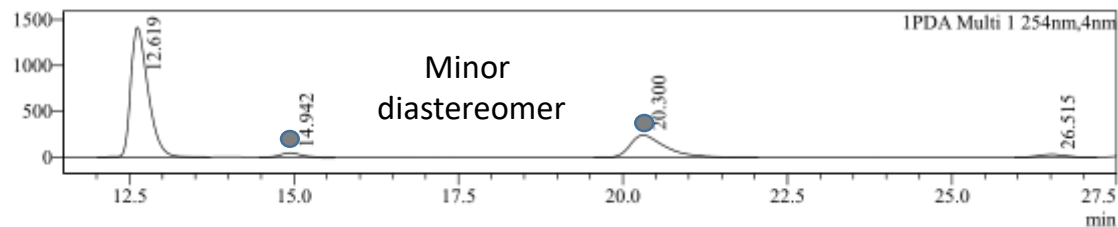

UV Spectrum

Retention time = 12.619

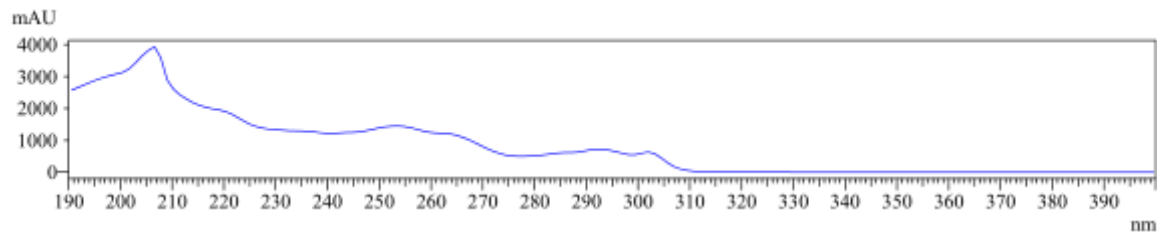

UV Spectrum

Retention time = 26.515

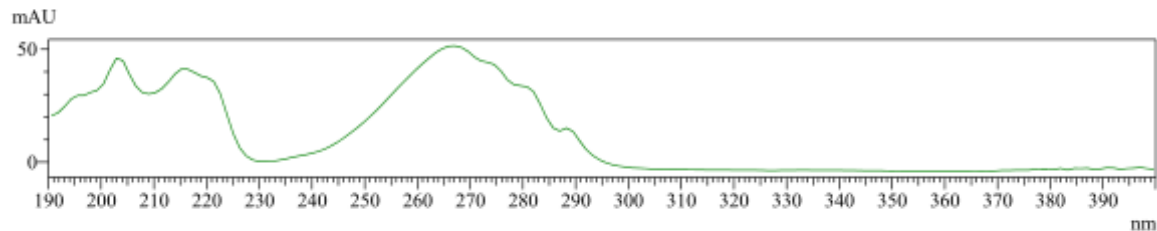

Peak Table

| Peak# | Ret. Time | Area     | Area%   |
|-------|-----------|----------|---------|
| 1     | 12.619    | 25840960 | 70.332  |
| 2     | 14.942    | 1295076  | 3.525   |
| 3     | 20.300    | 8808180  | 23.973  |
| 4     | 26.515    | 797214   | 2.170   |
| Total |           | 36741431 | 100.000 |

# $^1\text{H}$ NMR of **3n**, 600 MHz, $\text{CDCl}_3$

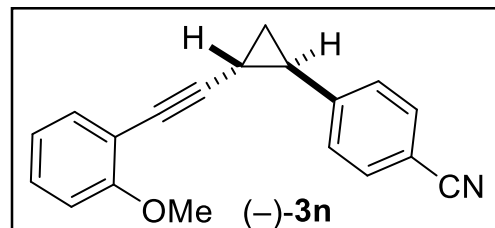

● Minor diastereomer

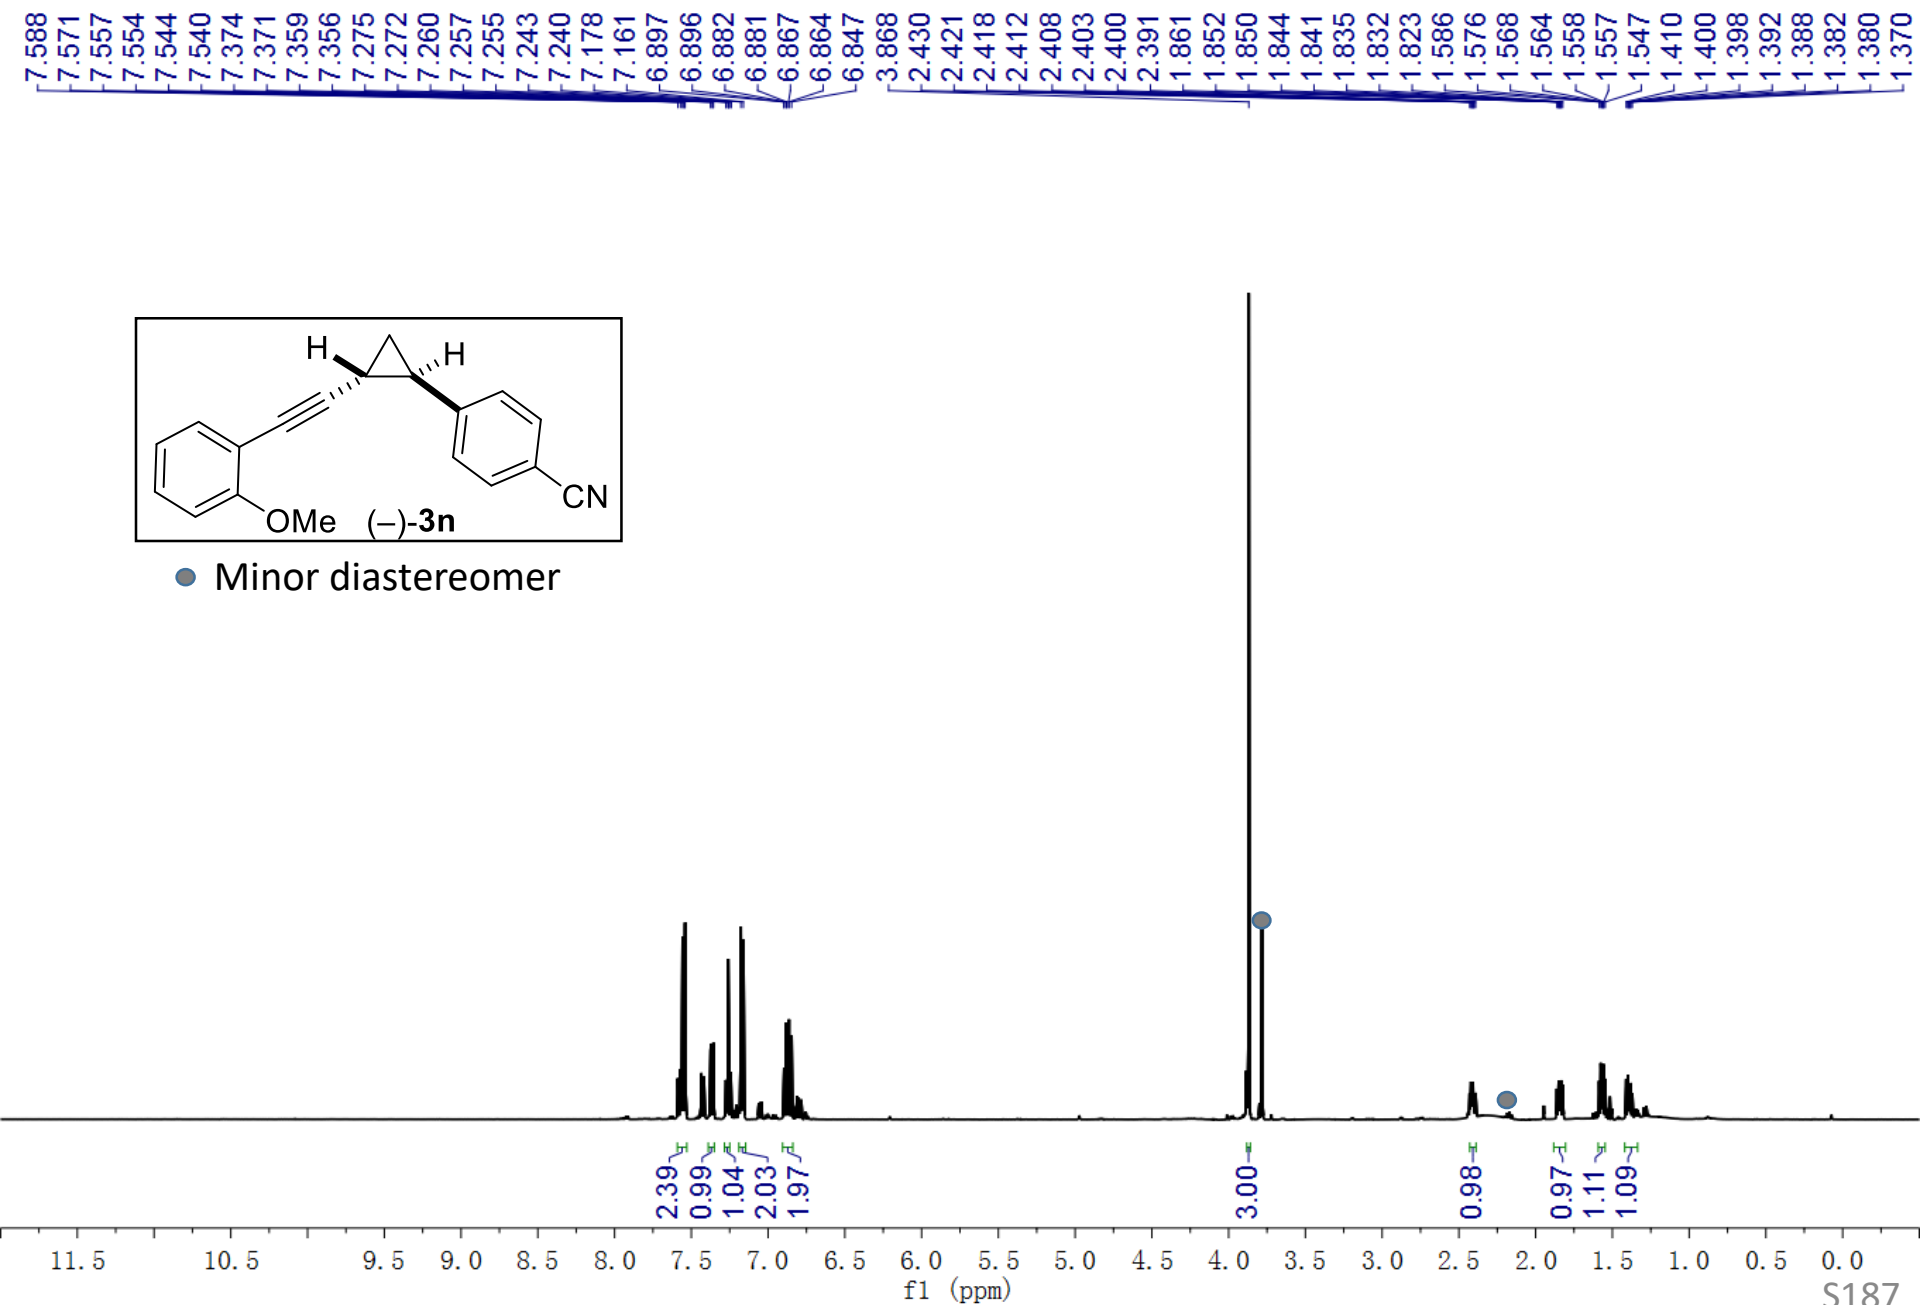

$^{13}\text{C}$  NMR of **3n**, 151 MHz,  $\text{CDCl}_3$

—160.148

—146.891

—133.782

—132.313

—129.439

—129.069

—126.579

—120.544

—119.043

—110.668

—109.886

—94.796

—77.415

—77.160

—76.906

—74.129

—55.865

—26.908

—19.276

—13.877

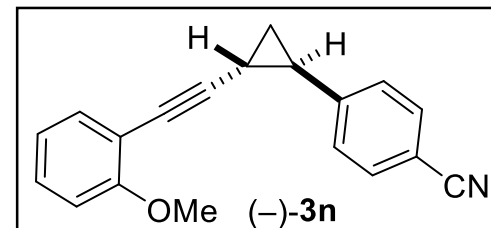

● Minor diastereomer

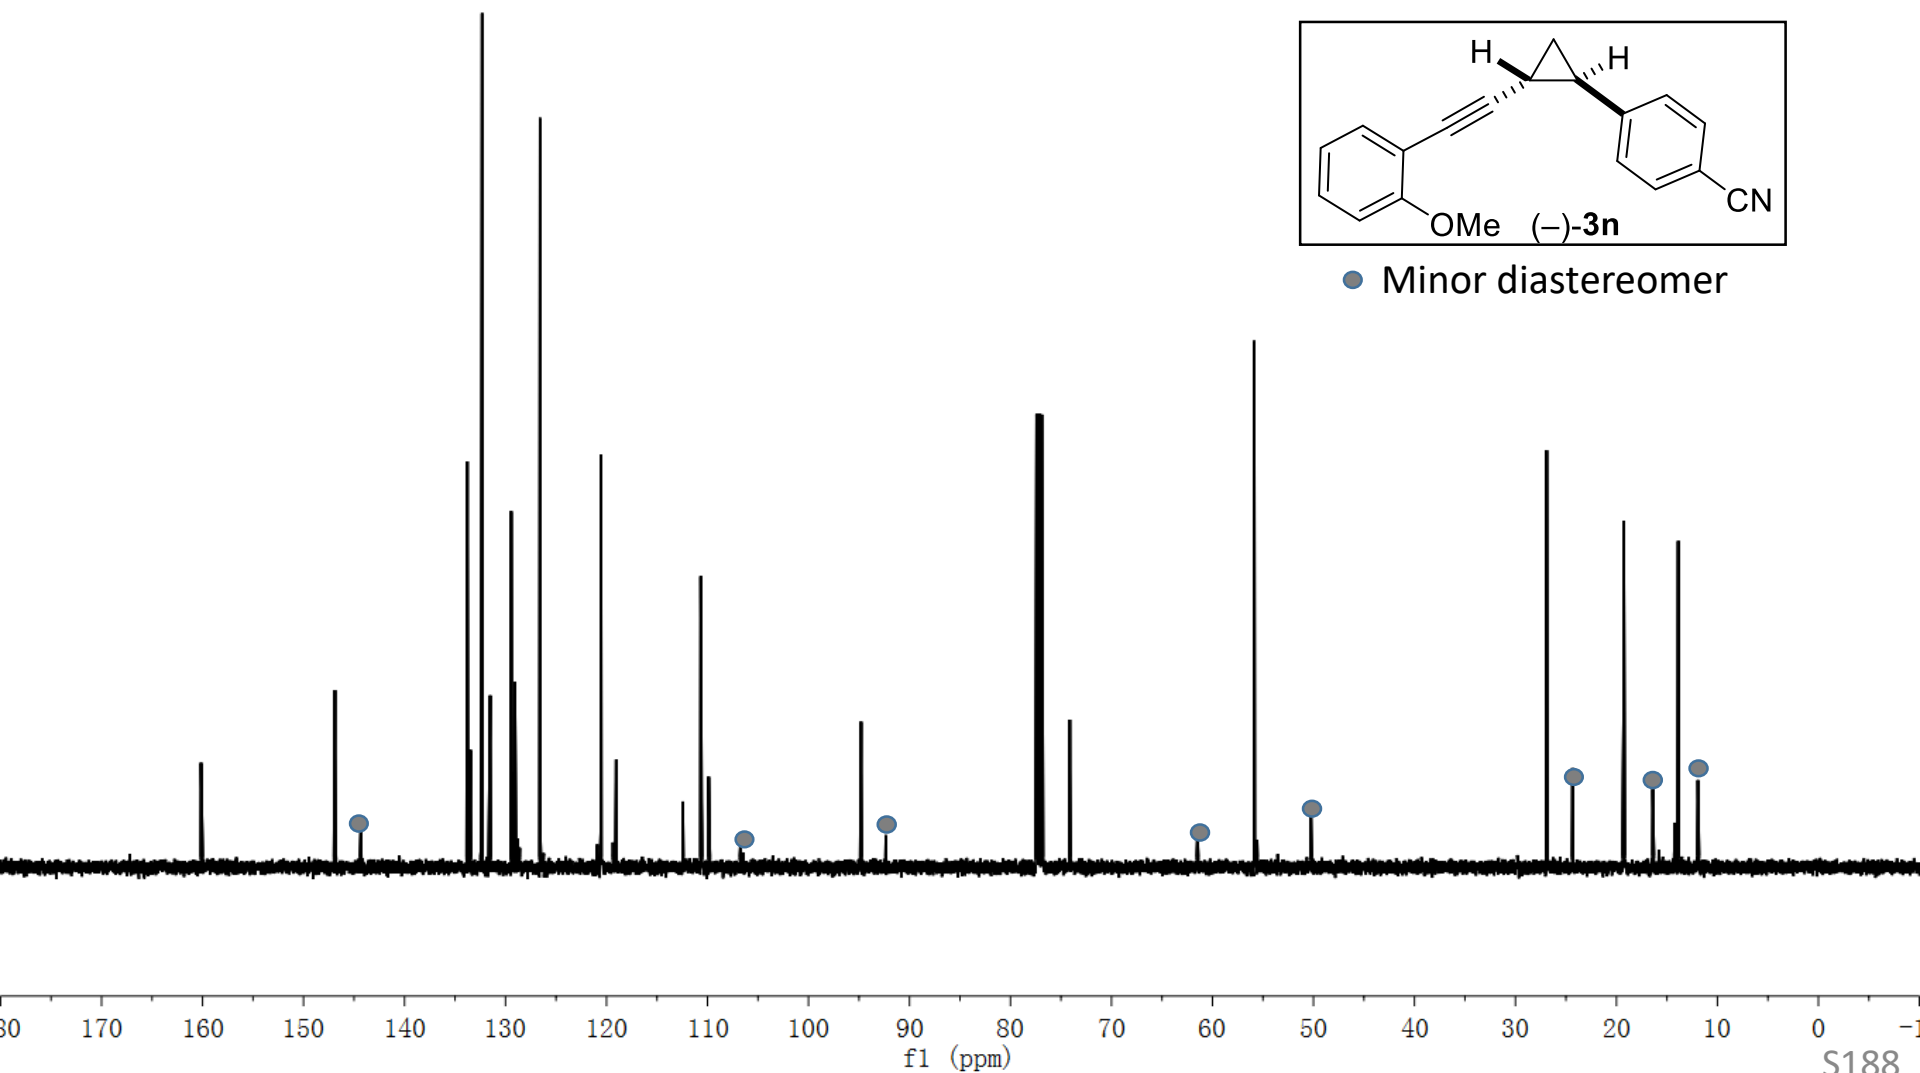

Data File : J0K-0631-IC--10%-1ML.lcd  
 Sample Name : J0K-0631-IC--10%-1ML  
 Sample ID : J0K-0631-IC--10%-1ML  
 Method File : J0K-10%--50min-1ml.lcm

Chromatogram

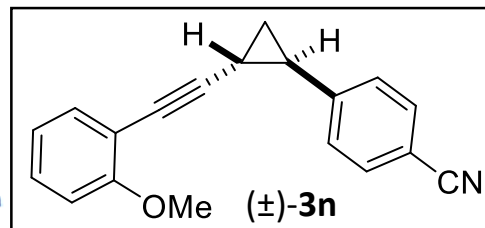

AU

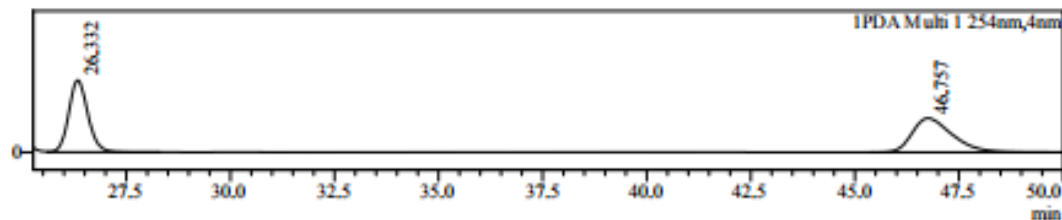

UV Spectrum  
 Retention time = 23.718

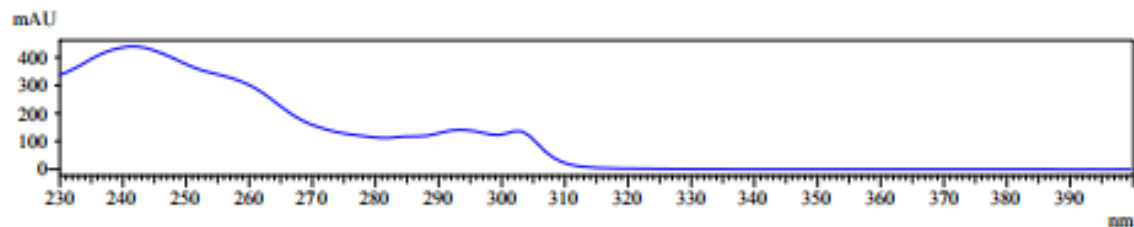

UV Spectrum  
 Retention time = 24.752

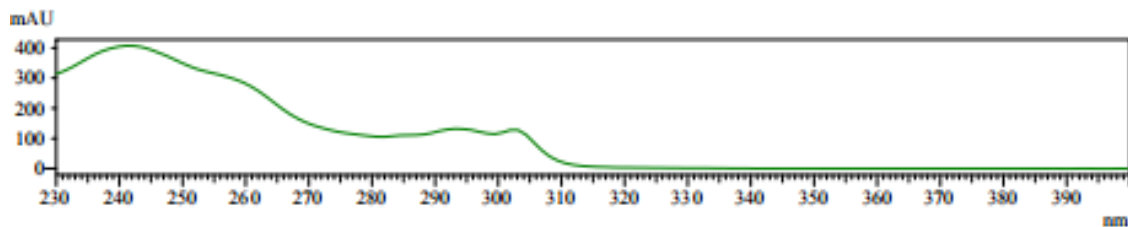

Peak Table

PDA Ch1 254nm

| Peak# | Ret. Time | Area     | Area%   |
|-------|-----------|----------|---------|
| 1     | 23.718    | 9570289  | 21.223  |
| 2     | 24.752    | 9632285  | 21.361  |
| 3     | 26.332    | 12974775 | 28.773  |
| 4     | 46.757    | 12916100 | 28.643  |
| Total |           | 45093449 | 100.000 |

Data File : J0K-0630-IC--10%-1ML.lcd  
 Sample Name : J0K-0630-IC--10%-1ML  
 Sample ID : J0K-0630-IC--10%-1ML  
 Method File : J0K-10%--50min-1ml.lcm

Chromatogram

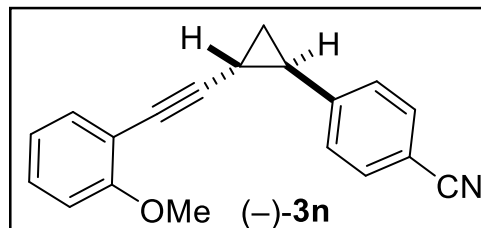

AU

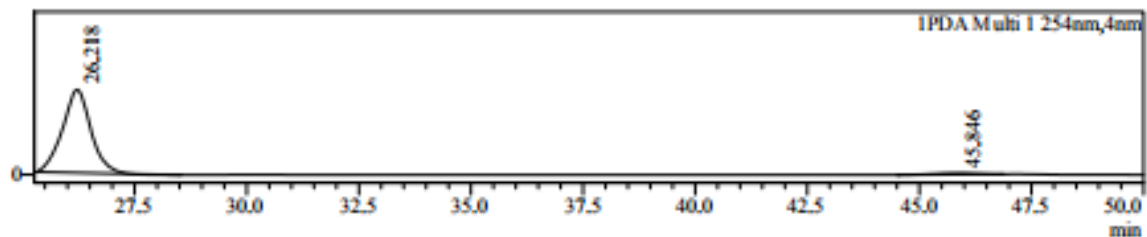

UV Spectrum  
 Retention time = 26.218

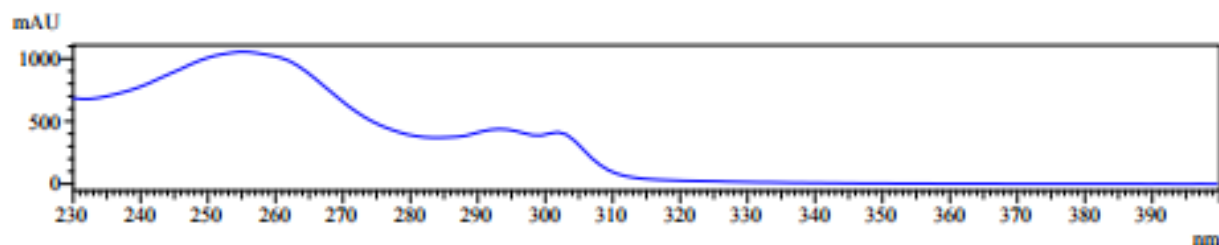

UV Spectrum  
 Retention time = 45.846

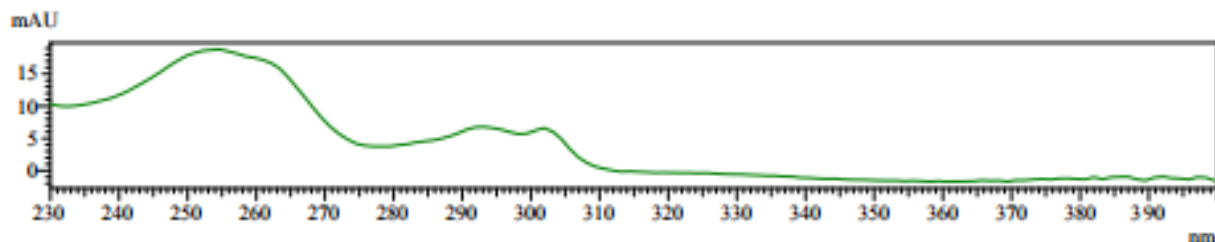

Peak Table

PDA Ch1 254nm

| Peak# | Ret. Time | Area     | Area%   |
|-------|-----------|----------|---------|
| 1     | 26.218    | 44689706 | 97.722  |
| 2     | 45.846    | 1041945  | 2.278   |
| Total |           | 45731651 | 100.000 |

# $^1\text{H}$ NMR of **3o**, 600 MHz, $\text{CDCl}_3$

8.052  
8.048  
8.040  
8.036  
7.961  
7.468  
7.455  
7.442  
7.387  
7.385  
7.375  
7.373  
7.279  
7.252  
6.904  
6.891  
6.879  
6.871  
6.857

2.505  
2.497  
2.490  
2.482  
2.480  
2.473  
2.464

1.871  
1.864  
1.857  
1.592  
1.584  
1.577  
1.574  
1.569  
1.559  
1.448  
1.439  
1.433  
1.424

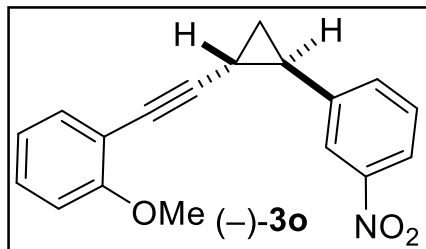

● Minor diastereomer

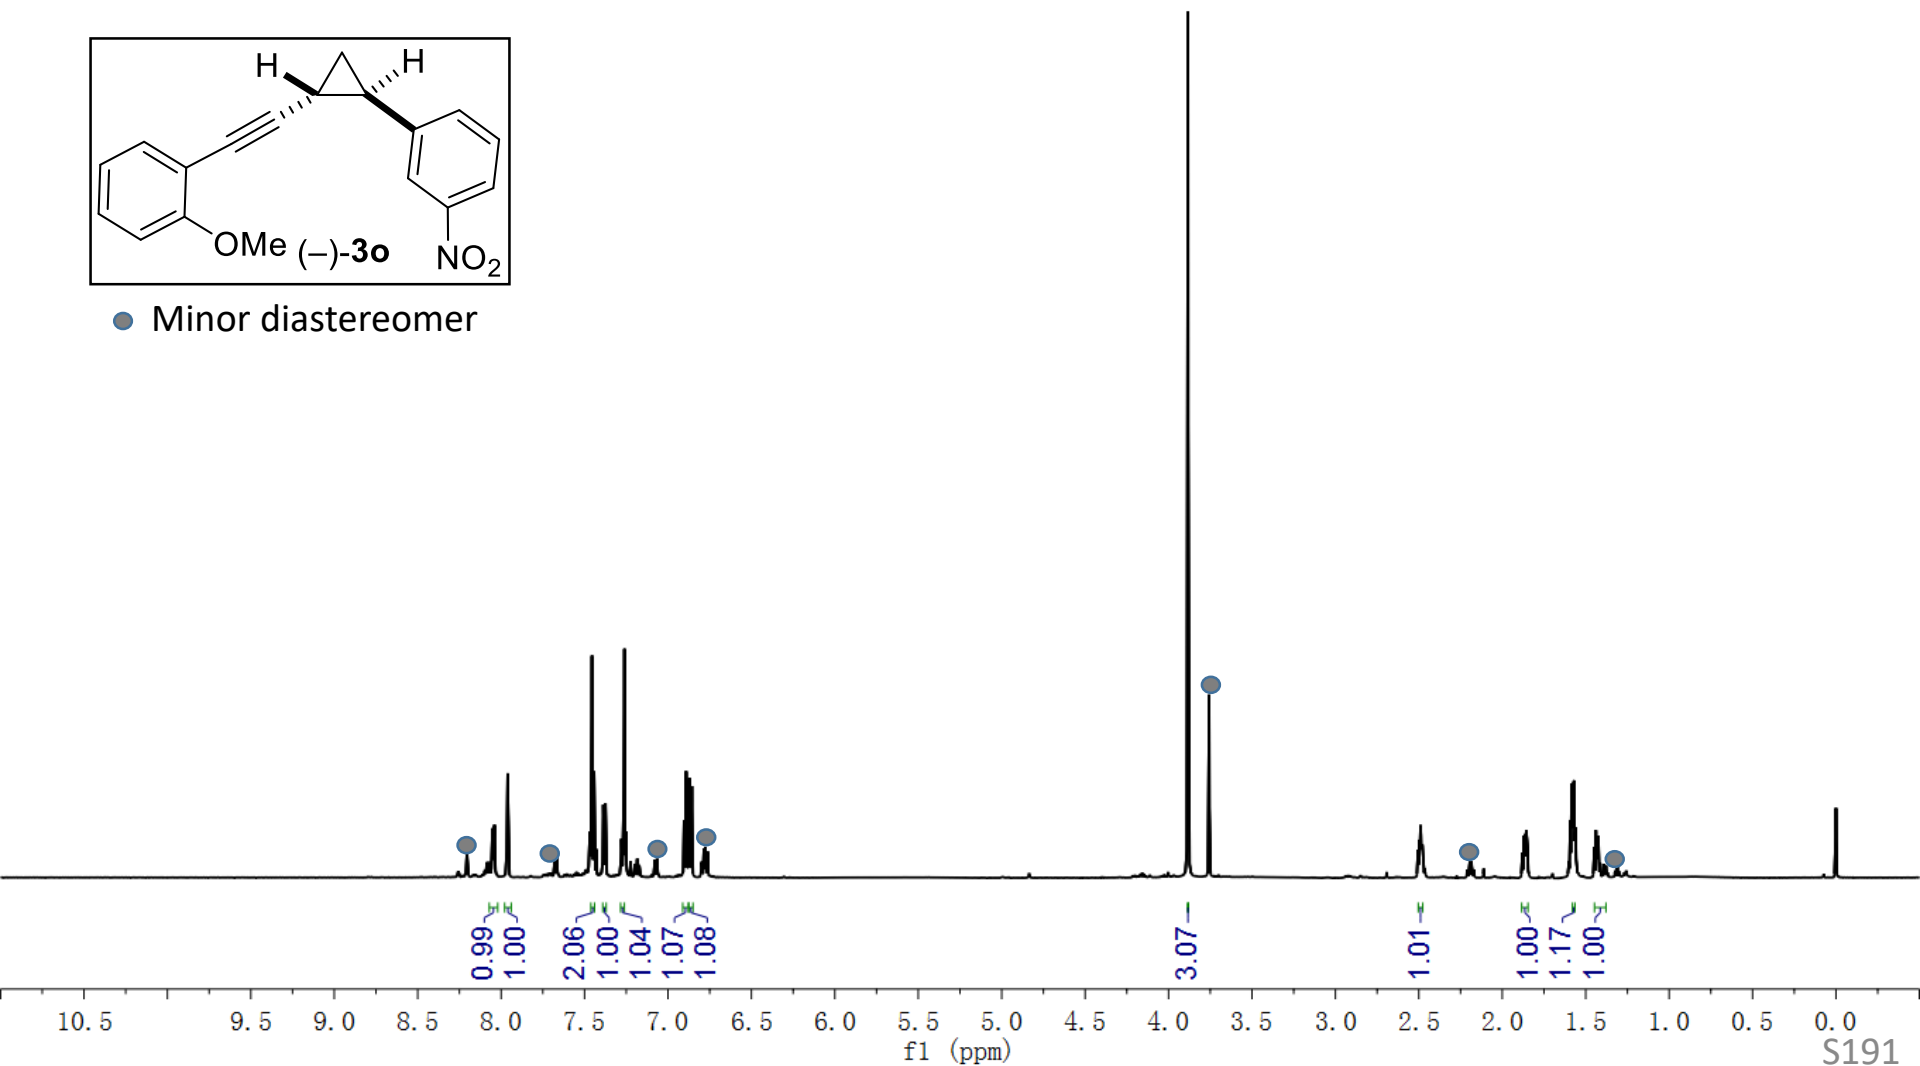

$^{13}\text{C}$  NMR of **3o**, 151 MHz,  $\text{CDCl}_3$



● Minor diastereomer

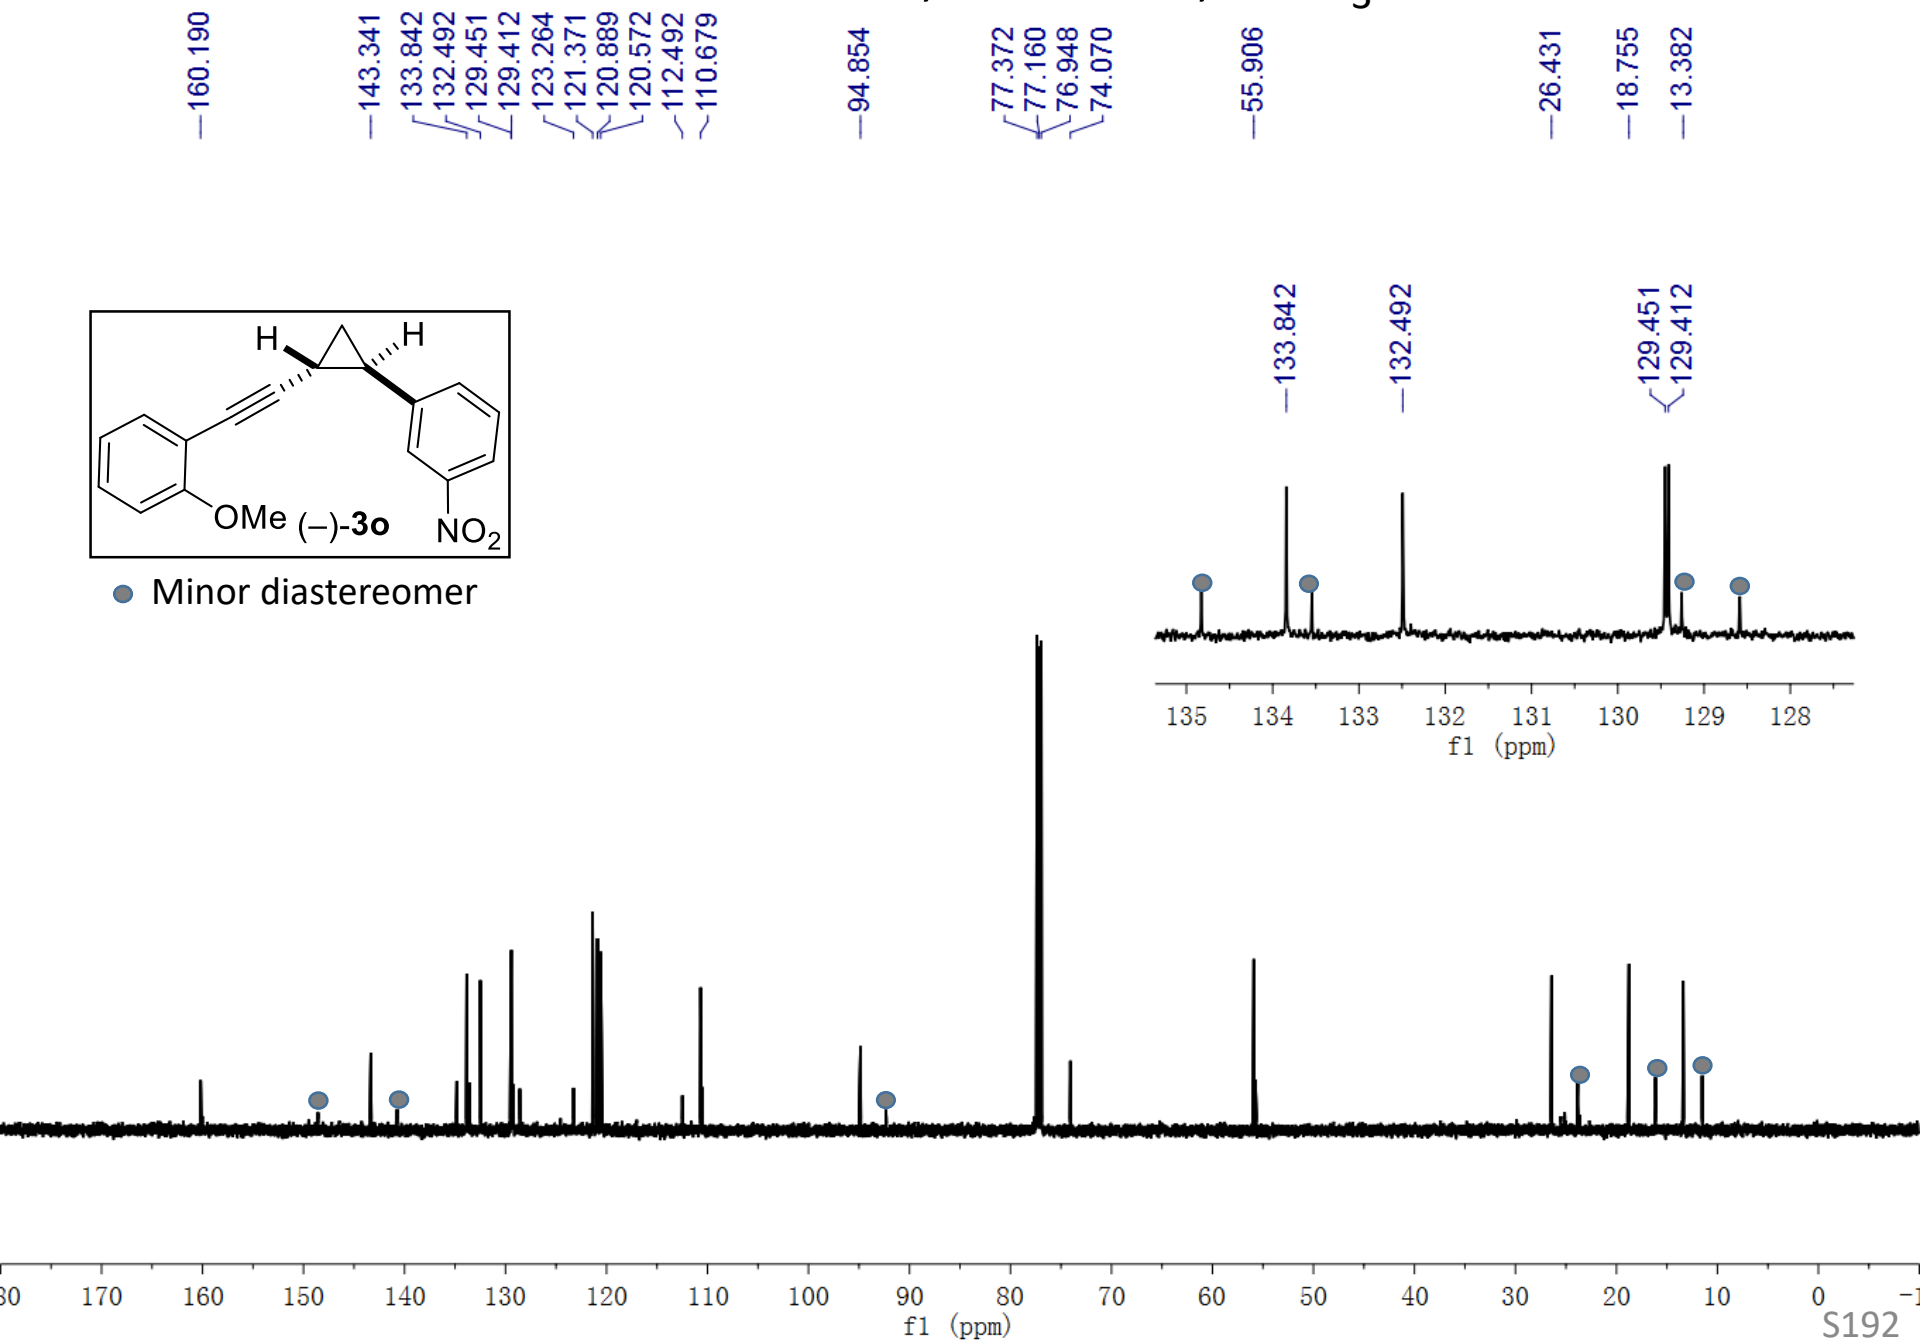



Data File : J0K-0629-IC--10%-1ML.lcd  
 Sample Name : J0K-0629-IC--10%-1ML  
 Sample ID : J0K-0629-IC--10%-1ML  
 Method File : J0K-10%-50min-1ml.lcm

Chromatogram

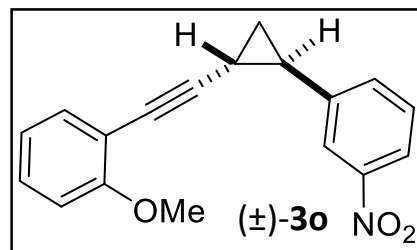

mAU

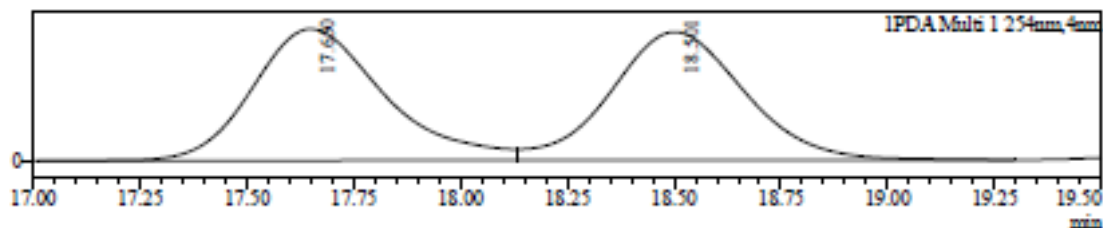

UV Spectrum

Retention time = 17.650

mAU

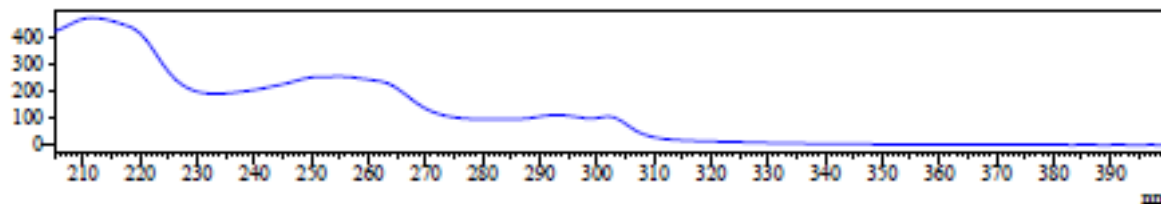

UV Spectrum

Retention time = 18.501

mAU

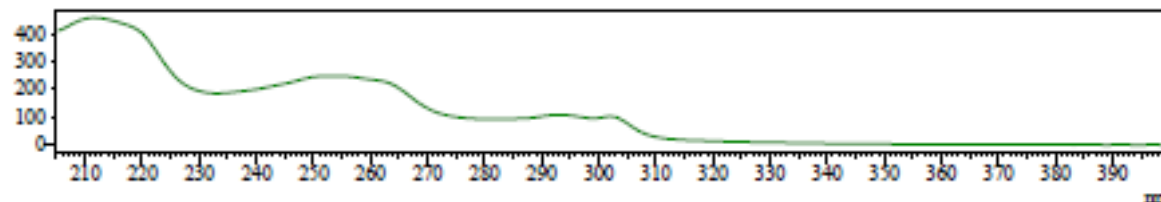

Peak Table

PDA Ch1 254nm

| Peak# | Ret. Time | Area     | Area%   |
|-------|-----------|----------|---------|
| 1     | 17.650    | 5392862  | 50.364  |
| 2     | 18.501    | 5314868  | 49.636  |
| Total |           | 10707730 | 100.000 |

Data File : JOK-0628-IC--10%-1ML.lcd  
 Sample Name : JOK-0628-IC--10%-1ML  
 Sample ID : JOK-0628-IC--10%-1ML  
 Method File : JOK-10%--50min-1ml.lcm

Chromatogram

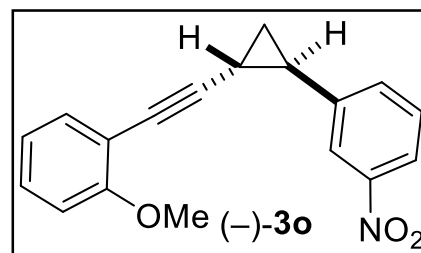

mAU

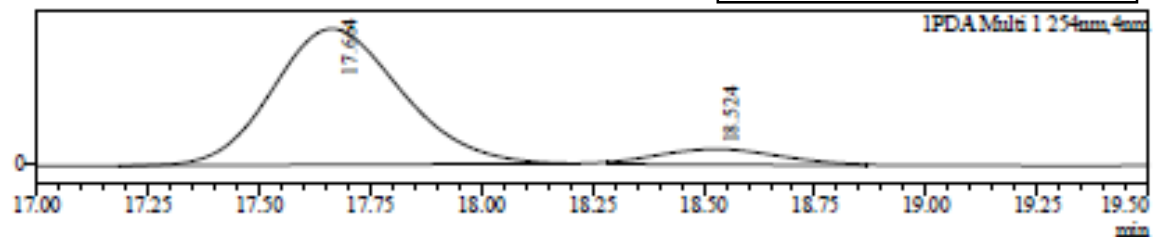

UV Spectrum  
 Retention time = 17.664

mAU

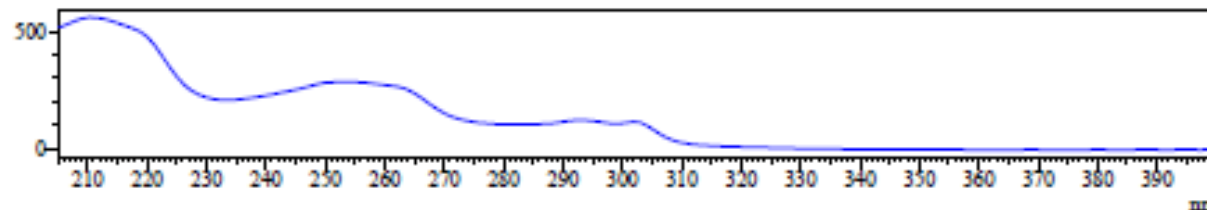

UV Spectrum  
 Retention time = 18.524

mAU

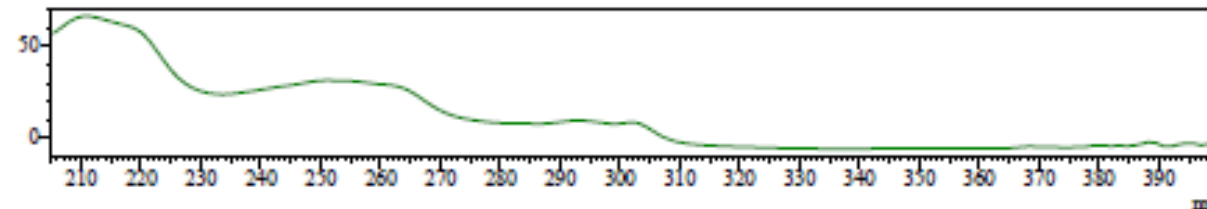

Peak Table

PDA Ch1 254nm

| Peak# | Ret. Time | Area    | Area%   |
|-------|-----------|---------|---------|
| 1     | 17.664    | 5722100 | 90.281  |
| 2     | 18.524    | 616010  | 9.719   |
| Total |           | 6338110 | 100.000 |

# $^1\text{H}$ NMR of **3p**, 500 MHz, $\text{CDCl}_3$

7.389  
7.385  
7.373  
7.370  
7.270  
7.266  
7.260  
7.254  
7.253  
7.251  
7.238  
7.234  
7.101  
7.097  
7.090  
7.083  
7.077  
7.073  
6.999  
6.985  
6.981  
6.972  
6.968  
6.964  
6.950  
6.901  
6.900  
6.886  
6.885  
6.871  
6.869  
6.867  
6.850  
3.882  
2.379  
2.376  
2.370  
1.740  
1.739  
1.732  
1.730  
1.723  
1.721  
1.712  
1.467  
1.457  
1.449  
1.446  
1.439  
1.428  
1.317  
1.307  
1.305  
1.300  
1.295  
1.290  
1.287  
1.278

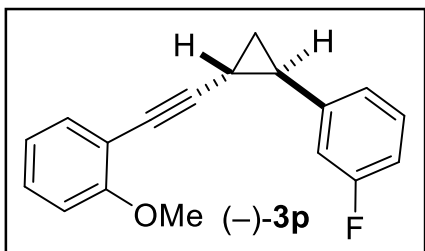

● Minor diastereomer

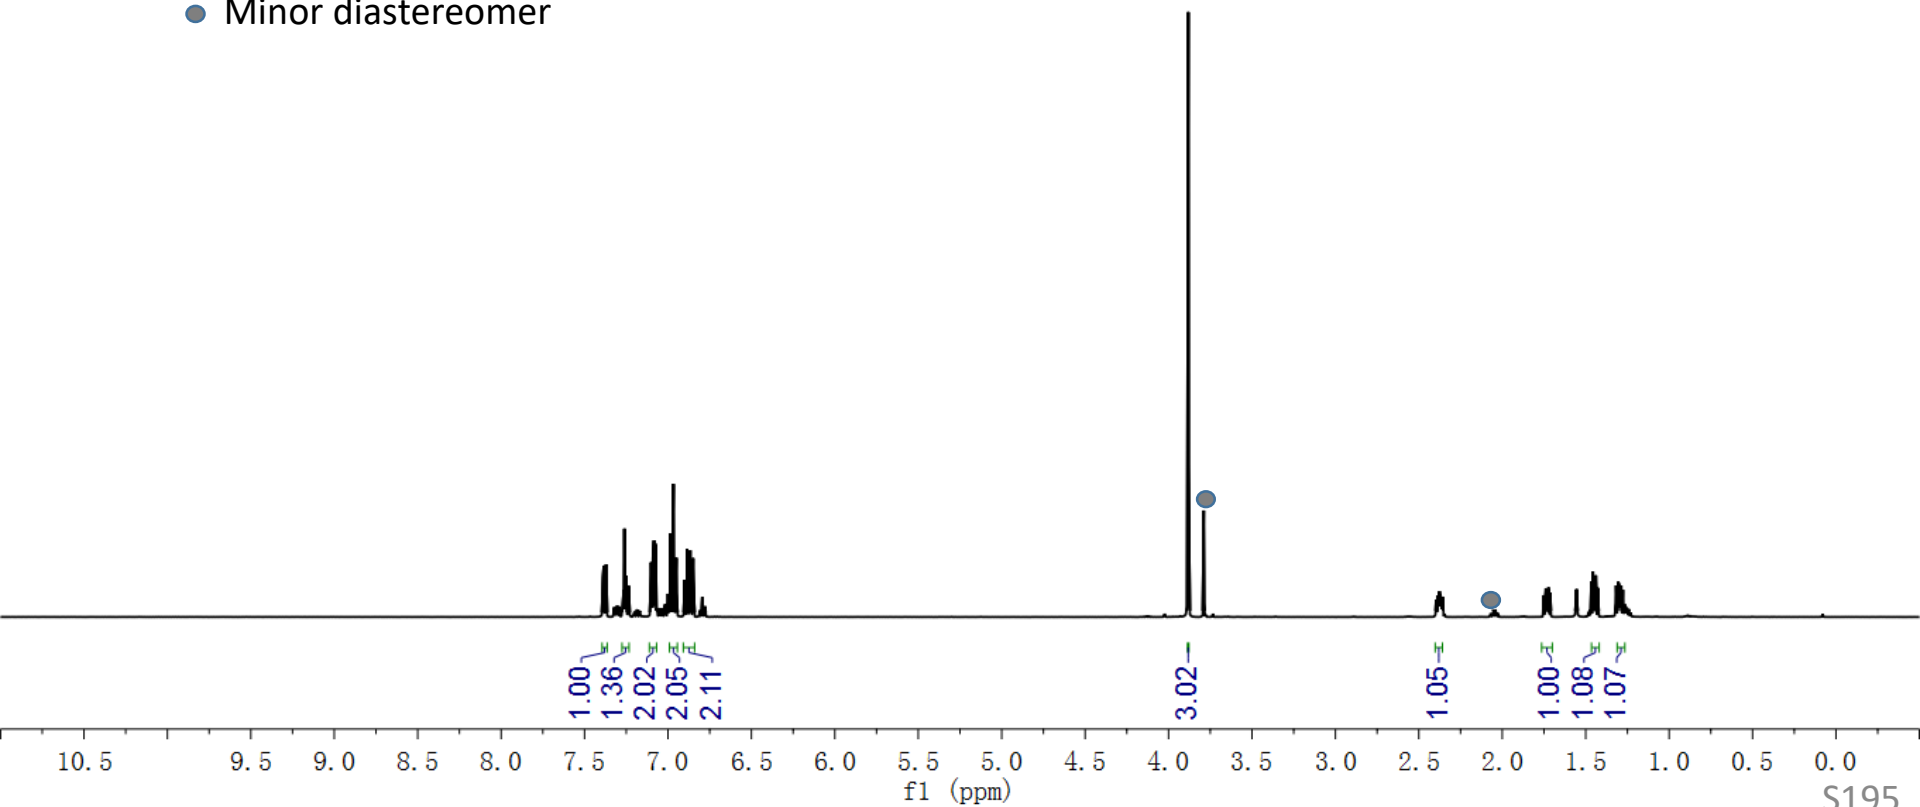

# $^{13}\text{C}$ NMR of **3p**, 126 MHz, $\text{CDCl}_3$

162.564  
160.621  
160.152

136.637  
136.611  
133.829  
129.213  
127.734  
127.670  
120.554  
115.407  
115.238  
112.840  
110.682

95.940

77.414  
77.160  
76.906  
73.377

55.913

26.183

18.267

12.417

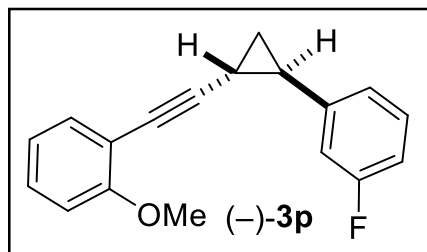

● Minor diastereomer

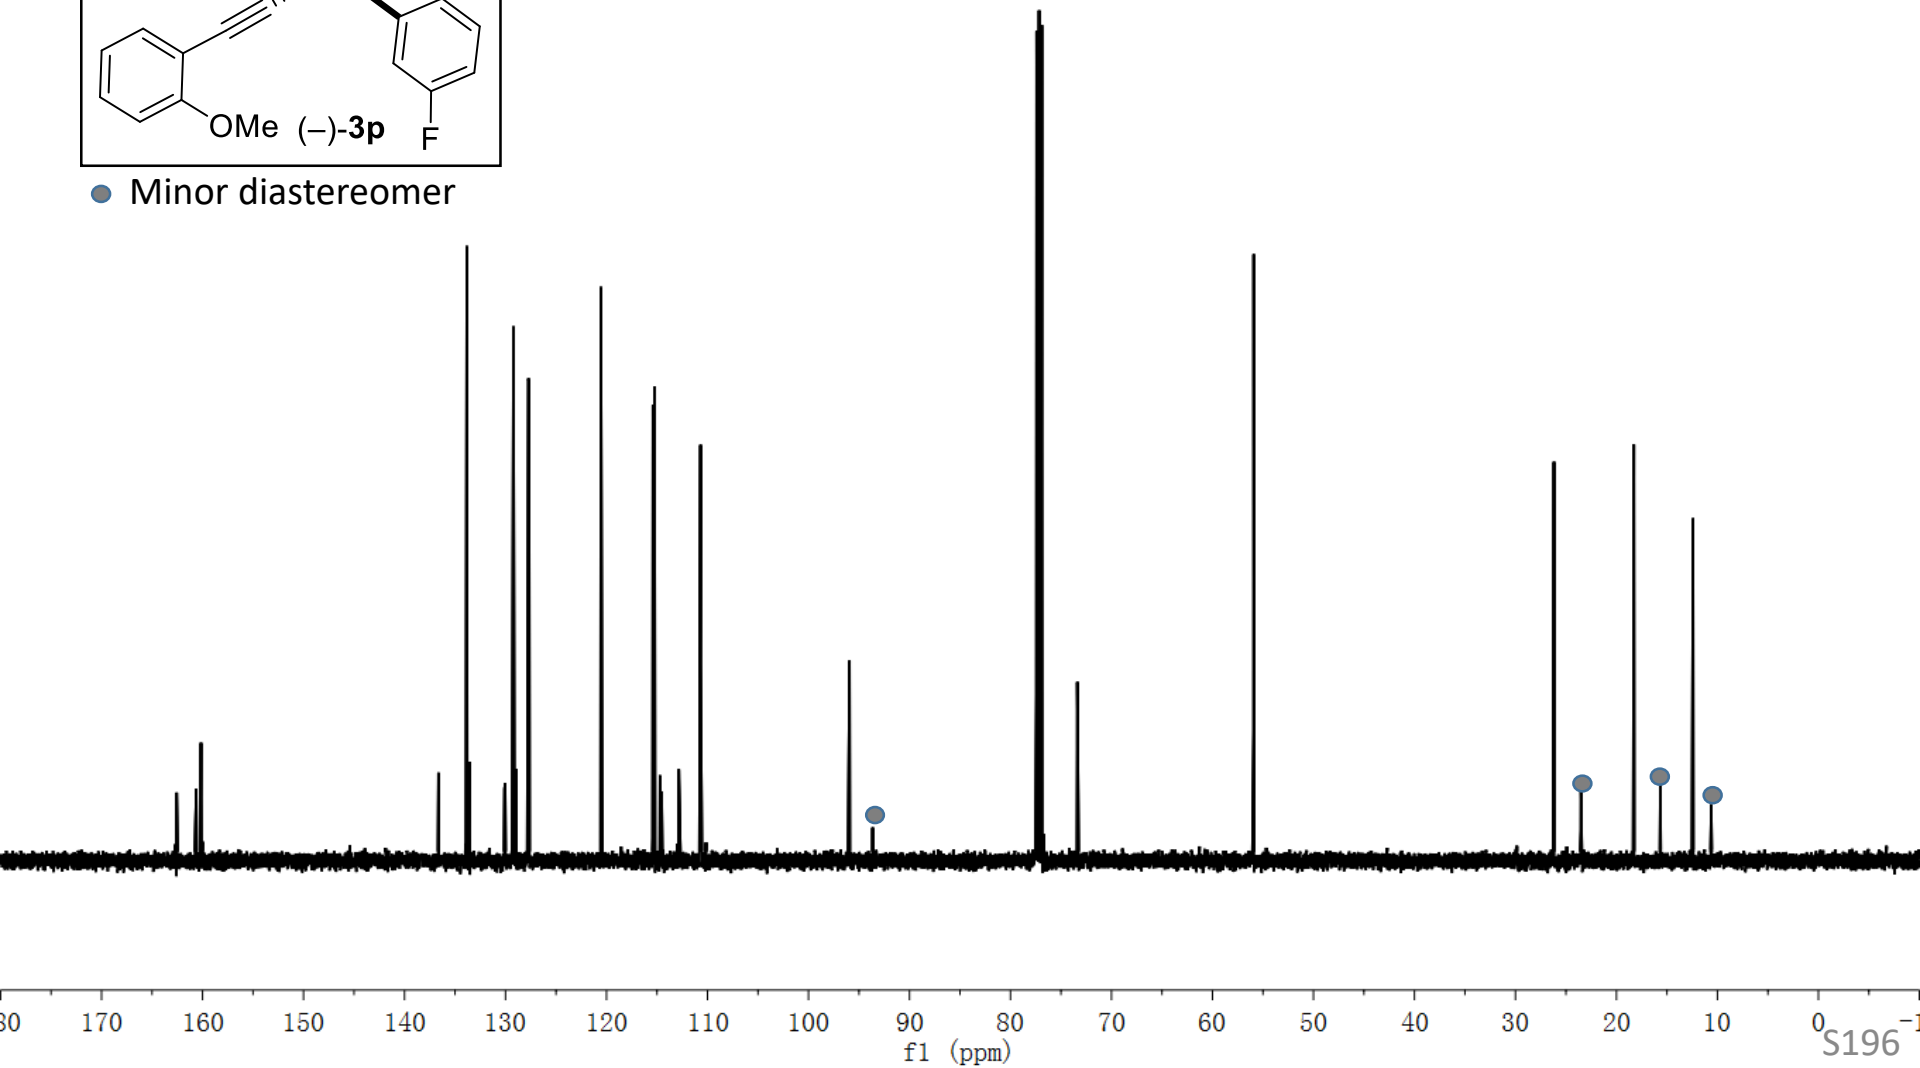

$^{19}\text{F}$  NMR of **3p**, 564 MHz,  $\text{CDCl}_3$

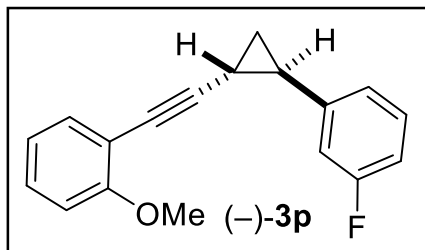

---108.262

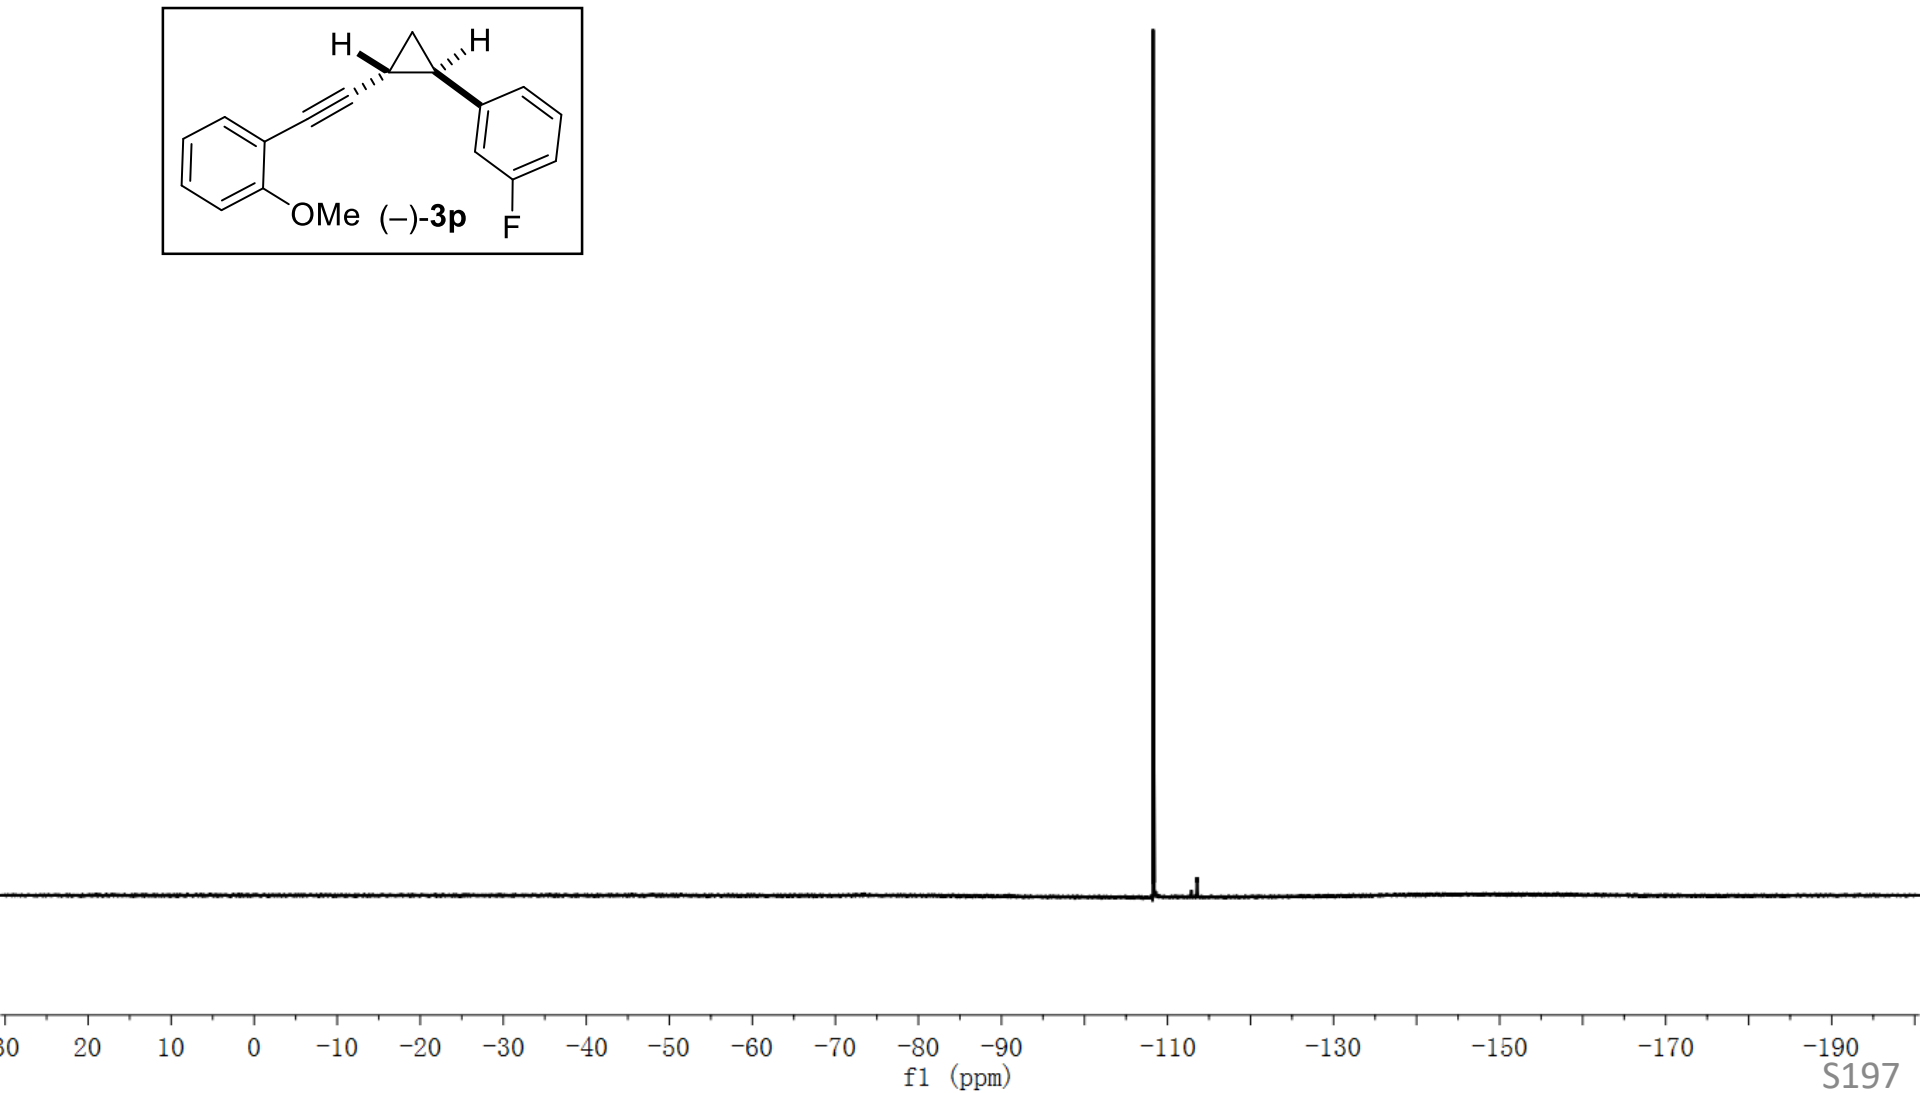

Data File : JOK-1512-new-IA--0.3%-1ML.lcd  
 Sample Name : JOK-1512-new-IA--0.3%-1 ML  
 Sample ID : JOK-1512-new-IA--0.3%-1ML  
 Method File : JOK-0.3%-45min-1ml.lcm

Chromatogram

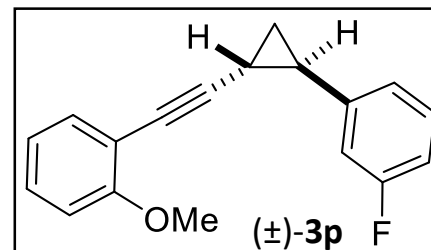

AU

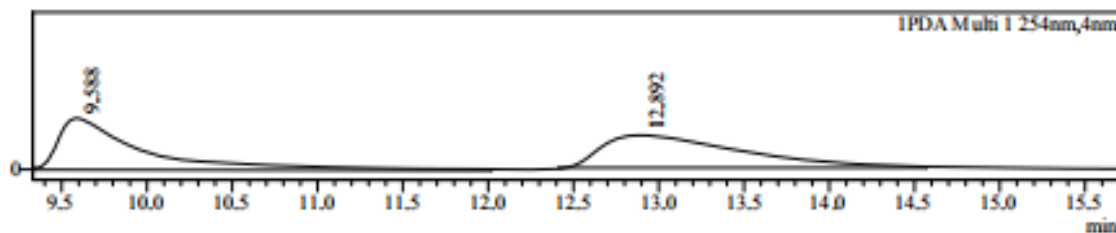

UV Spectrum  
 Retention time = 9.588

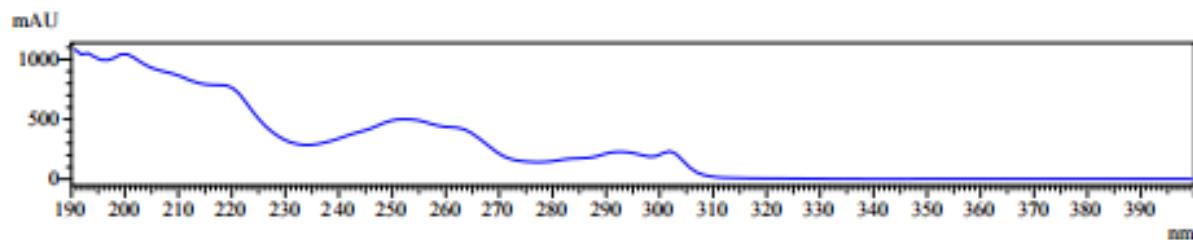

UV Spectrum  
 Retention time = 12.892

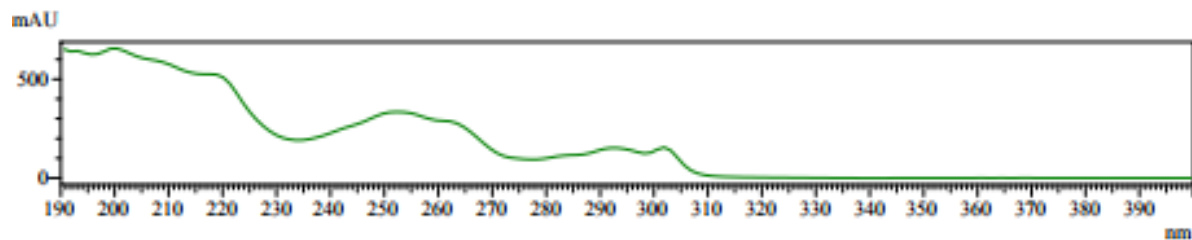

Peak Table

PDA Ch1 254nm

| Peak# | Ret. Time | Area     | Area%   |
|-------|-----------|----------|---------|
| 1     | 9.588     | 17225820 | 49.482  |
| 2     | 12.892    | 17586782 | 50.518  |
| Total |           | 34812602 | 100.000 |

Data File : J0K-1511-IA--0.3%-1ML.lcd  
 Sample Name : J0K-1511-IA--0.3%-1ML  
 Sample ID : J0K-1511-IA--0.3%-1ML  
 Method File : J0K-0.3%--25min-1ml.lcm  
 Chromatogram

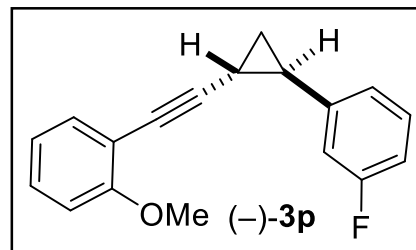

AU

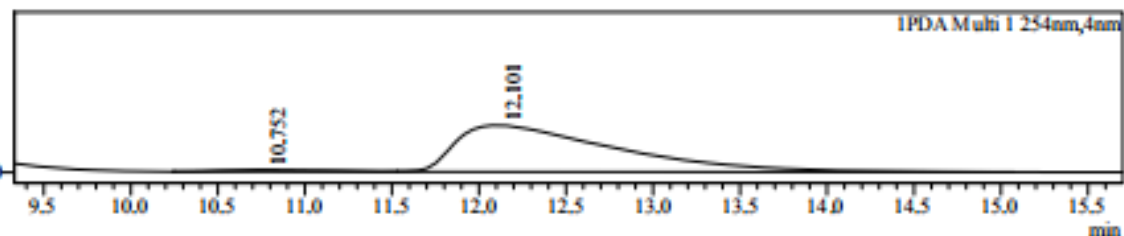

UV Spectrum  
 Retention time = 10.752

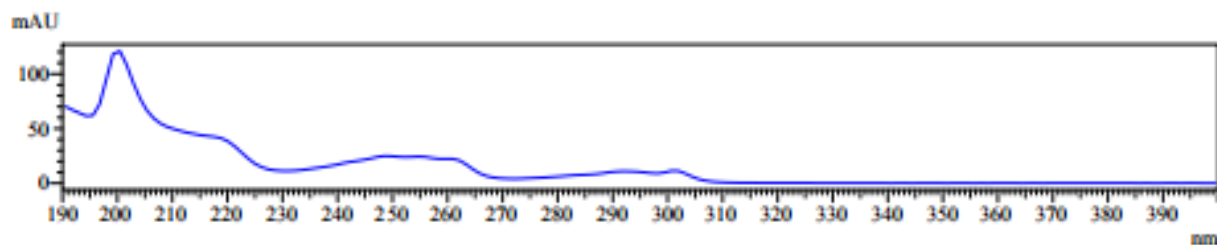

UV Spectrum  
 Retention time = 12.101

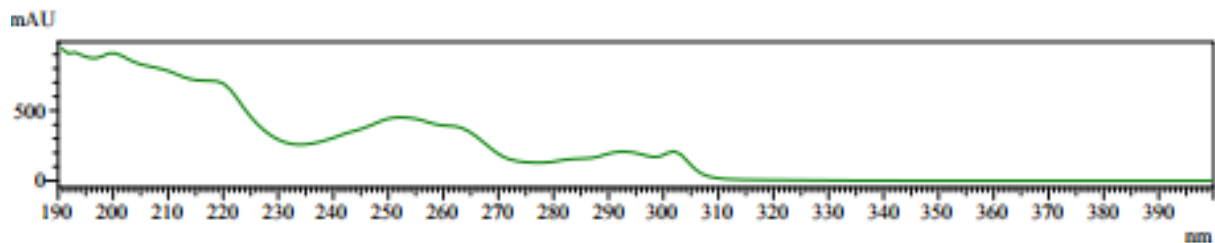

Peak Table

| Peak# | Ret. Time | Area     | Area%   |
|-------|-----------|----------|---------|
| 1     | 10.752    | 770306   | 2.706   |
| 2     | 12.101    | 27700720 | 97.294  |
| Total |           | 28471026 | 100.000 |

# $^1\text{H}$ NMR of **3q**, 500 MHz, $\text{CDCl}_3$

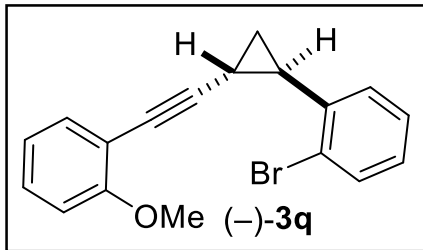

● Minor diastereomer

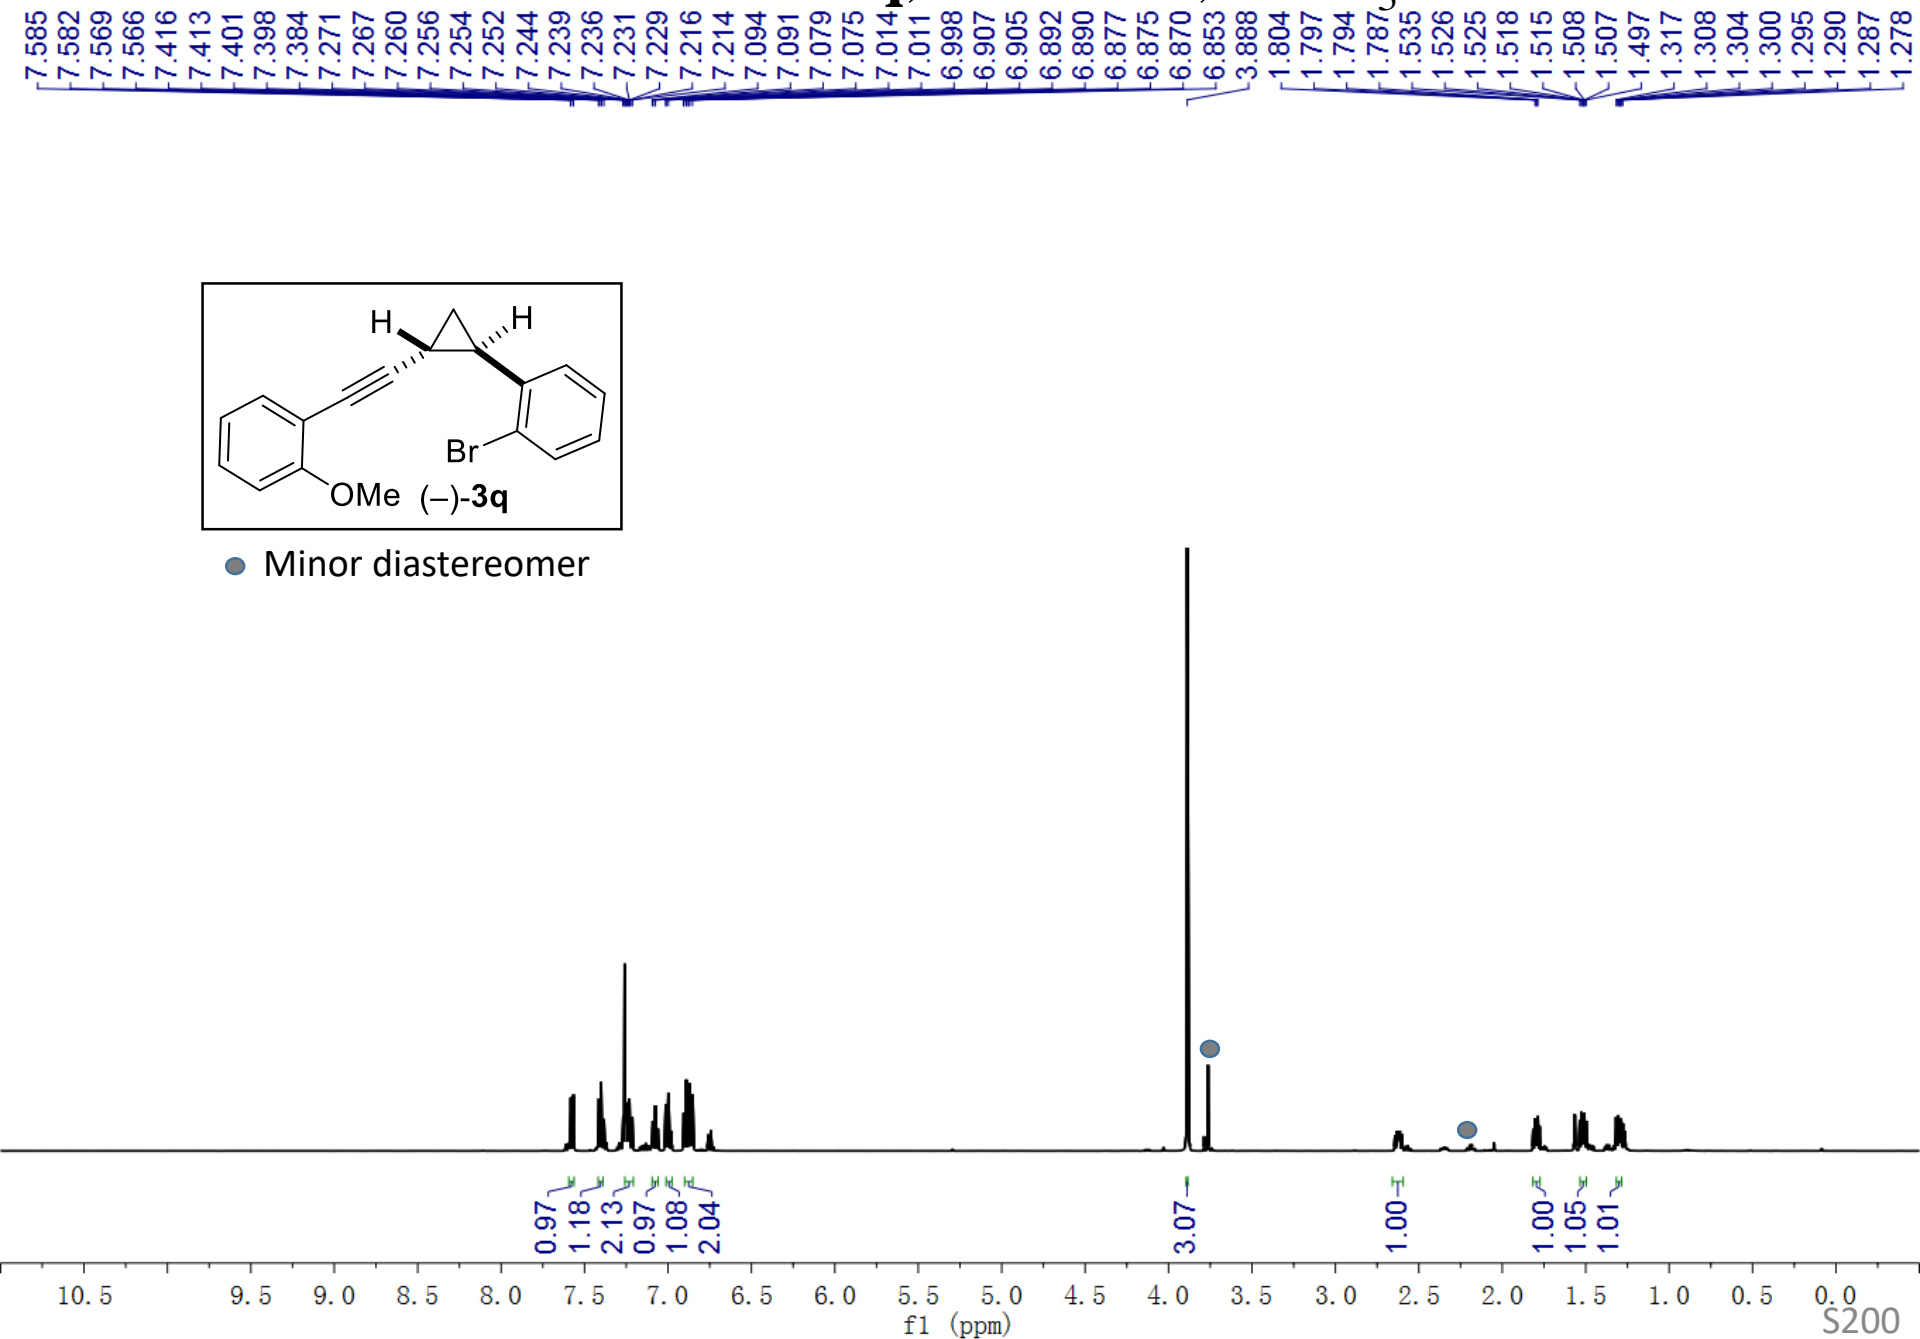



# $^{13}\text{C}$ NMR of **3q**, 151 MHz, $\text{CDCl}_3$

—160.229  
—140.051  
—133.922  
—132.739  
—131.547  
—129.186  
—127.955  
—127.453  
—127.220  
—126.333  
—120.538  
—110.747

—95.872

—77.414  
—77.160  
—76.906  
—73.444

—55.957

—27.586

—17.771

—11.439

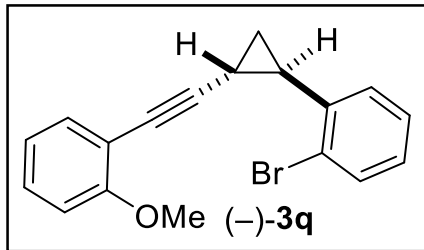

—133.922

—132.739

—131.547

—129.186

—127.955

—127.453

—127.220

—126.333

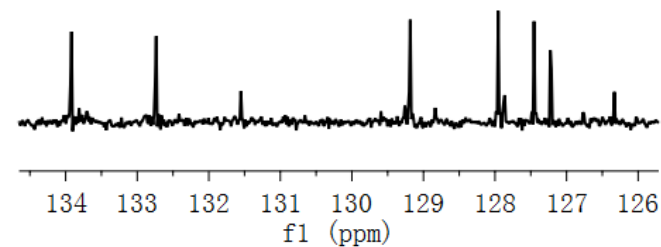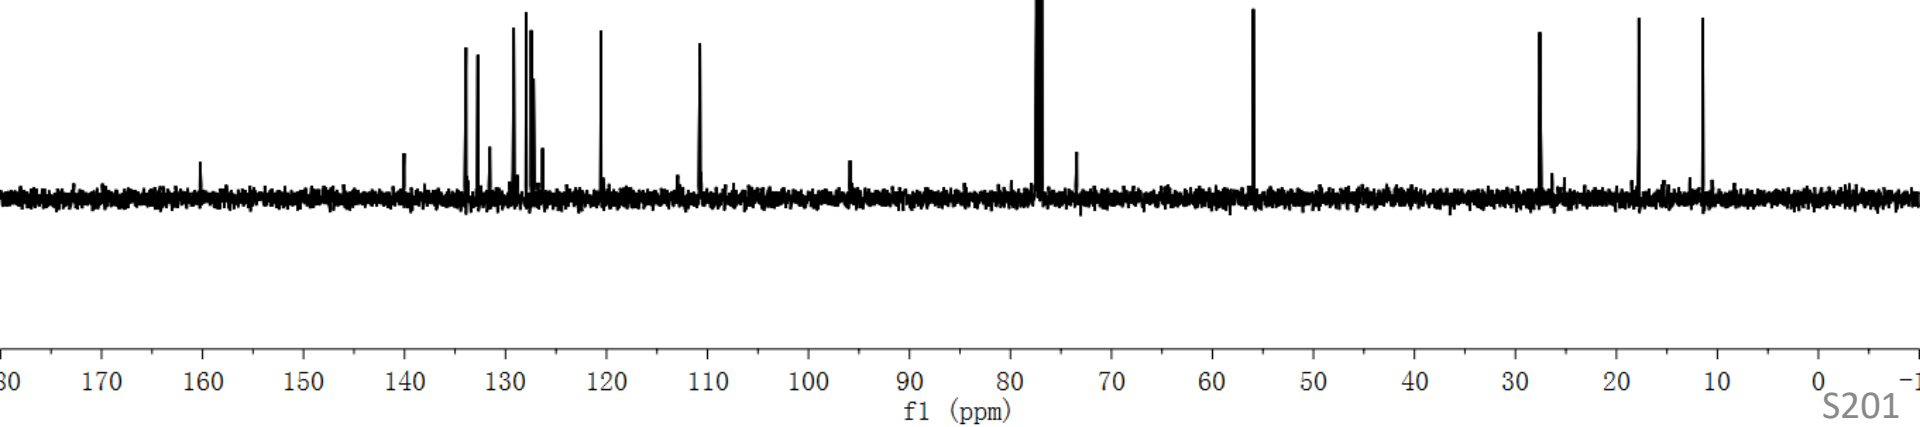

Data File : J0K-1451-ODH-2%-1ML-2.lcd  
 Sample Name : J0K-1451-ODH-2%-1ML-2  
 Sample ID : J0K-1451-ODH-2%-1ML-2  
 Method File : J0K-2%-40min-1ml.lcm

Chromatogram

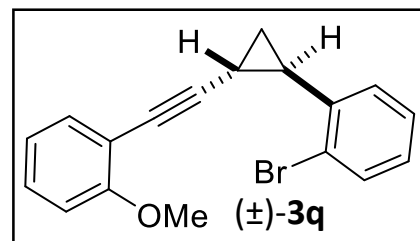

AU

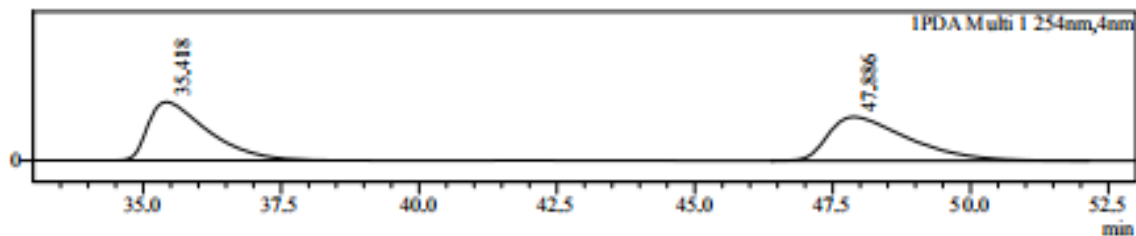

UV Spectrum

Retention time = 35.418

mAU

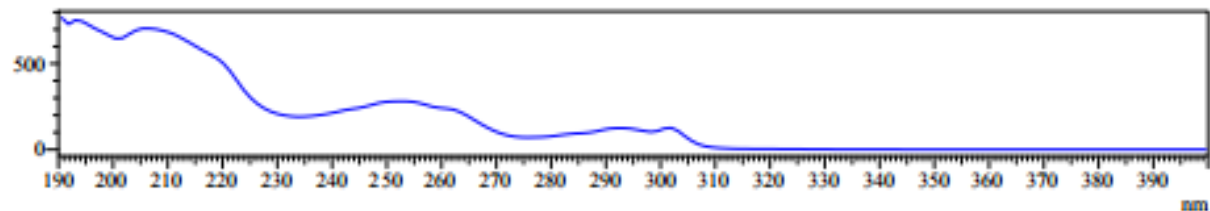

UV

Retention time = 47.886

mAU

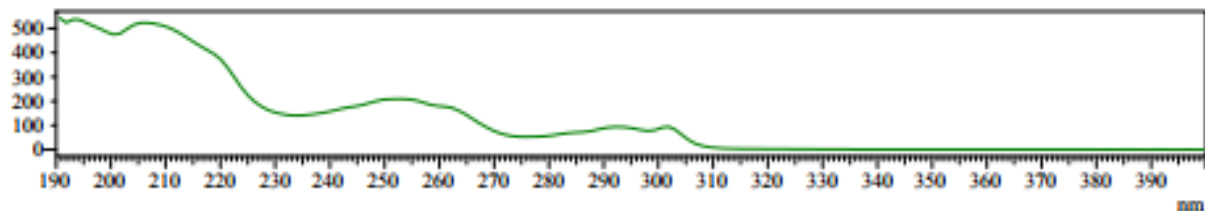

Peak Table

PDA Ch1 254nm

| Peak# | Ret. Time | Area     | Area%   |
|-------|-----------|----------|---------|
| 1     | 35.418    | 20668199 | 50.095  |
| 2     | 47.886    | 20589932 | 49.905  |
| Total |           | 41258131 | 100.000 |

Data File : J0K-1449-ODH-2%-1ML-2.kcd  
 Sample Name : J0K-1449-ODH-2%-1ML-2  
 Sample ID : J0K-1449-ODH-2%-1ML-2  
 Method File : J0K-2%-40min-1ml.lcm

Chromatogram

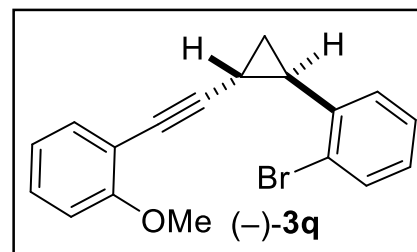

AU

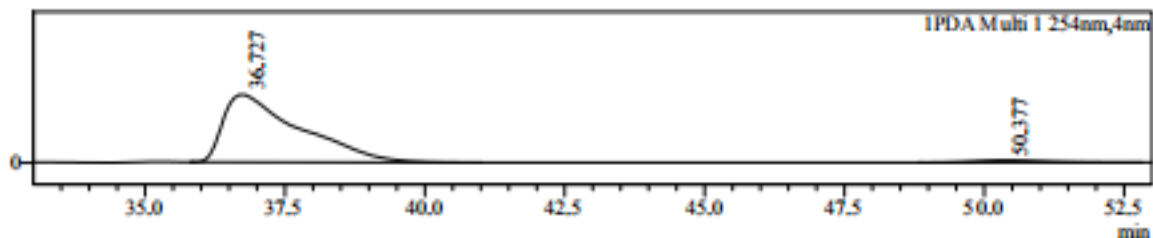

UV Spectrum

Retention time = 36.727

mAU

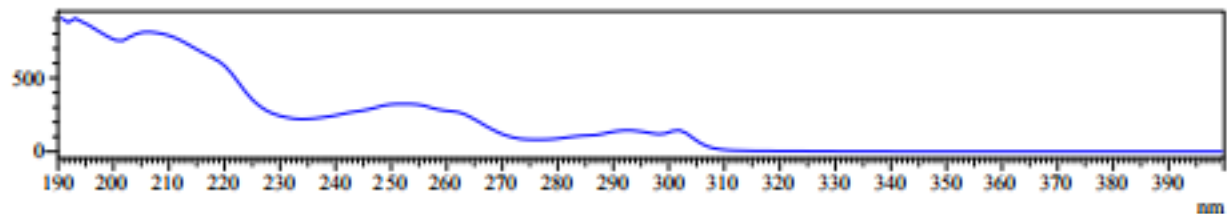

UV

Retention time = 50.377

mAU

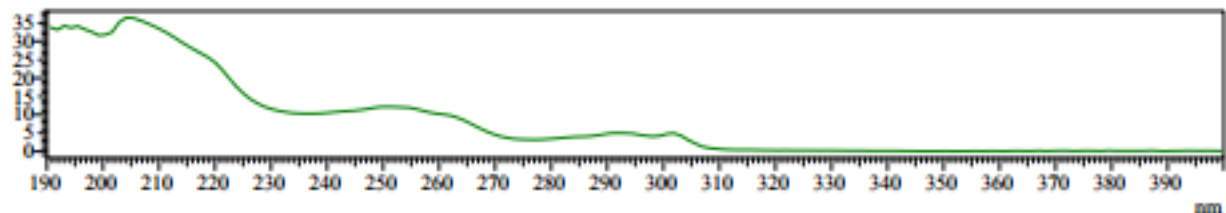

Peak Table

PDA Ch1 254nm

| Peak# | Ret. Time | Area     | Area%   |
|-------|-----------|----------|---------|
| 1     | 36.727    | 29767184 | 97.041  |
| 2     | 50.377    | 907689   | 2.959   |
| Total |           | 30674873 | 100.000 |

# $^1\text{H}$ NMR of **3r**, 600 MHz, $\text{CDCl}_3$

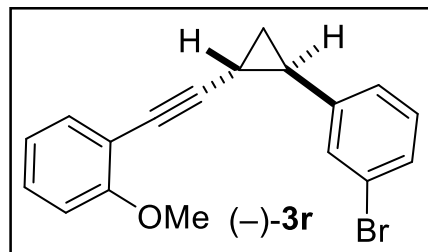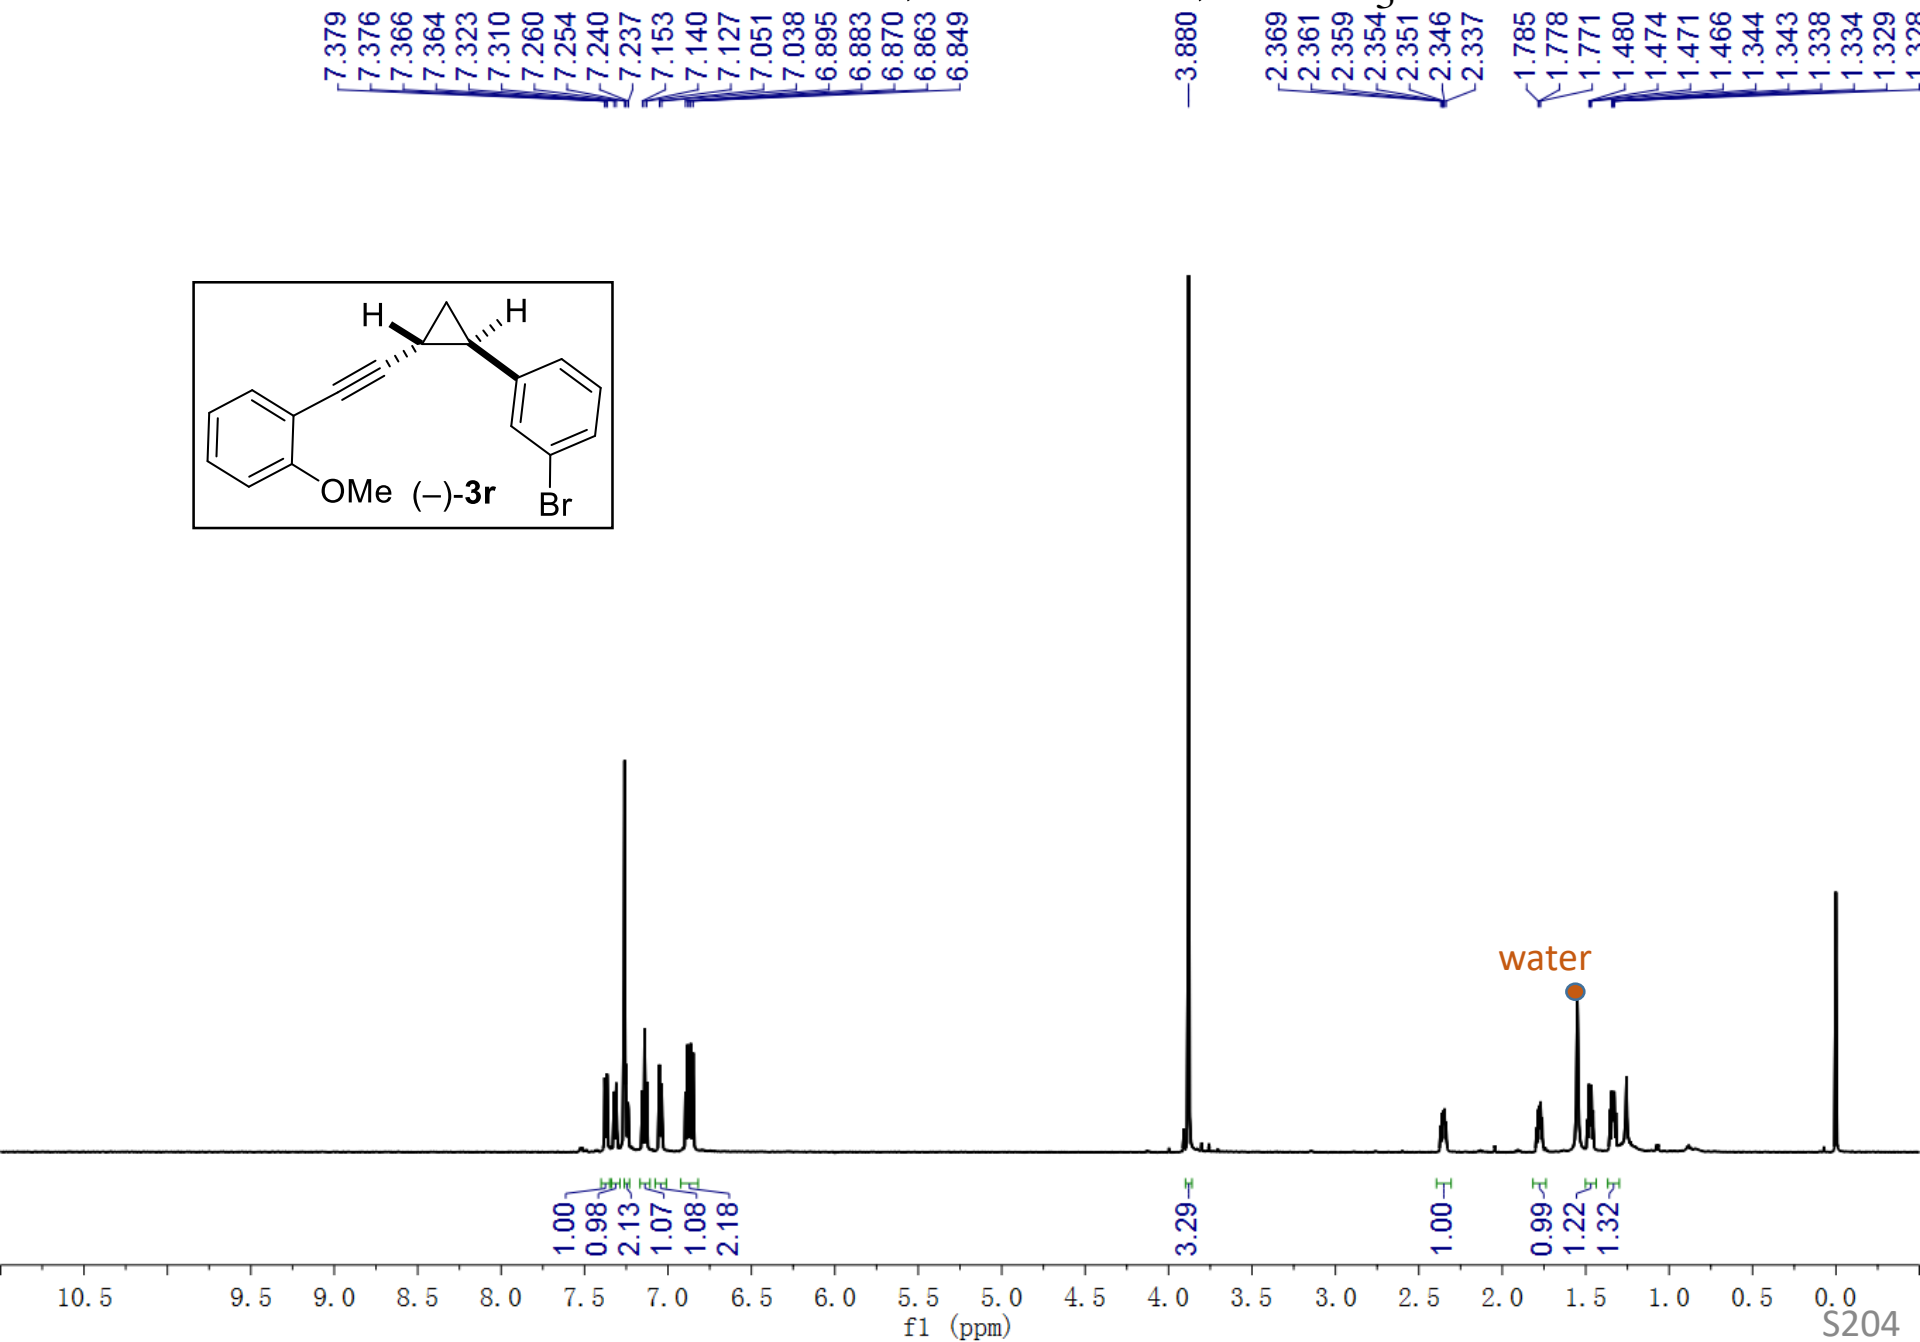

$^{13}\text{C}$  NMR of **3r**, 151 MHz,  $\text{CDCl}_3$

—160.178  
—143.490  
—133.850  
—130.047  
—129.416  
—129.302  
—129.292  
—124.877  
—122.685  
—120.561  
—112.731  
—110.680

—95.546

—77.372  
—77.160  
—76.948  
—73.624

—55.921

—26.478

—18.473

—12.853

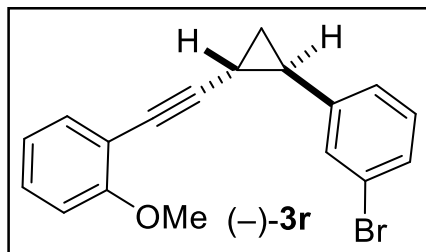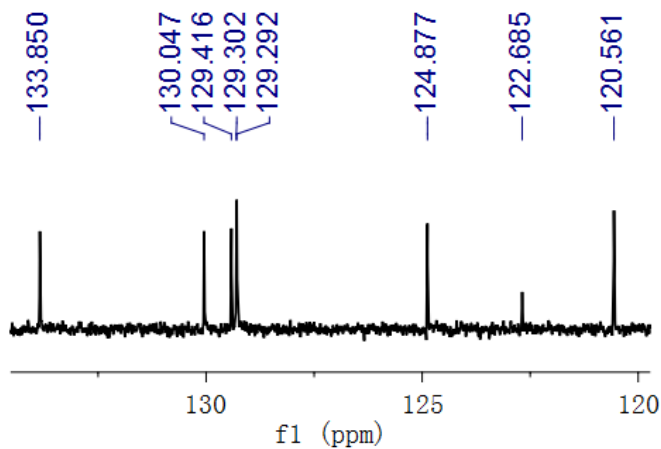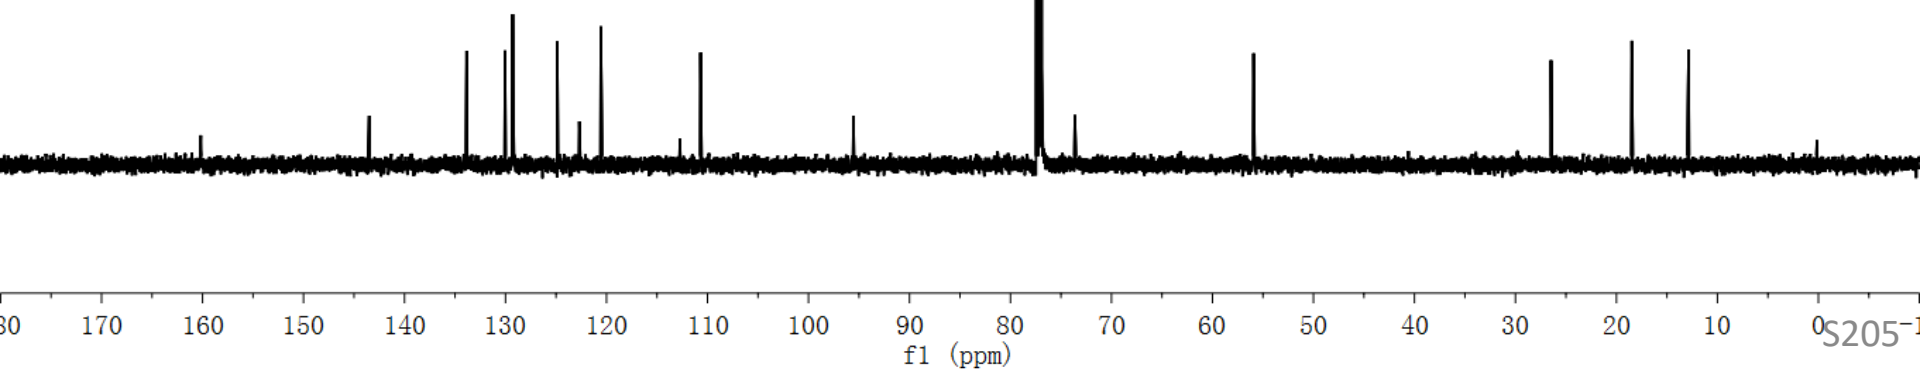

Data File : J0K-0341-IC-1%-0.8ML-isopropanol-solvent005.lcd  
 Sample Name : J0K-0341-IC-1%-0.8ML-isopropanol-solvent005  
 Sample ID : J0K-0341-IC-1%-0.8ML-iso propano  
 Method File : J0K-1%-0.8ml-50min.lcm  
 Chromatogram

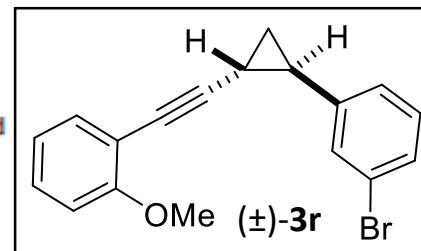

mAU

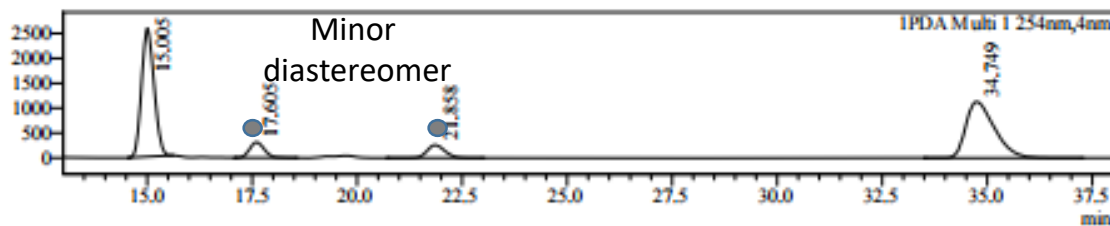

UV Spectrum

Retention time = 15.005

mAU

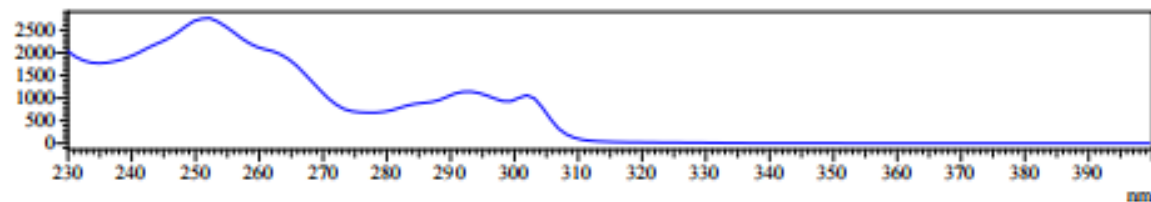

U

Retention time = 34.749

mAU

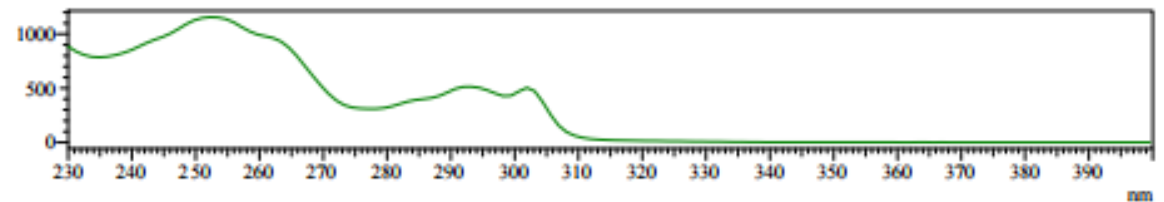

Peak Table

PDA Ch1 254nm

| Peak# | Ret. Time | Area      | Area%   |
|-------|-----------|-----------|---------|
| 1     | 15.005    | 53369617  | 43.836  |
| 2     | 17.605    | 7481137   | 6.145   |
| 3     | 21.858    | 7551737   | 6.203   |
| 4     | 34.749    | 53346423  | 43.817  |
| Total |           | 121748915 | 100.000 |

Data File : J0K-0297-IC-1%-0.8ML-isopropanol-solvent017.lcd  
 Sample Name : J0K-0297-IC-1%-0.8ML-isopropanol-solvent017  
 Sample ID : J0K-0297-IC-1%-0.8ML-iso propano  
 Method File : J0K-1%-0.8m-50MINI.lcm  
 Chromatogram

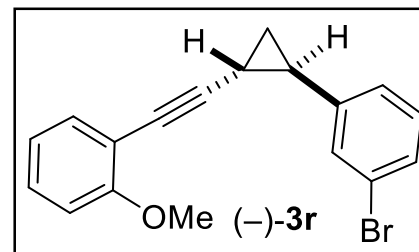

mAU

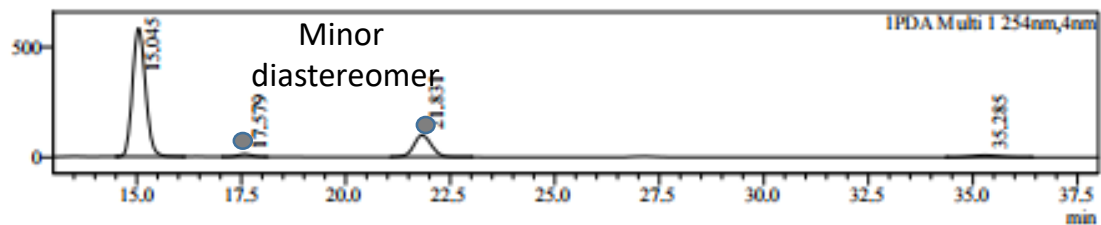

UV Spectrum  
 Retention time = 15.045

mAU

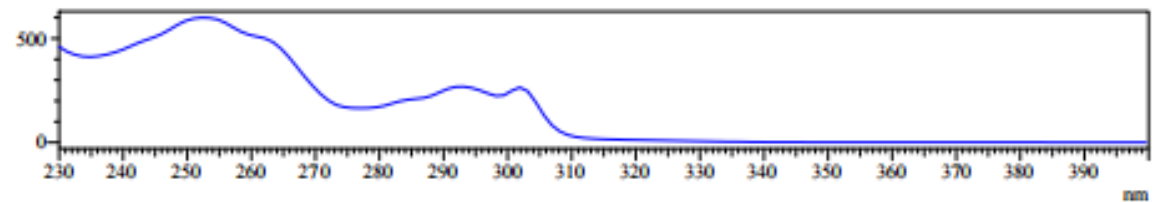

J  
 Retention time = 35.285

mAU

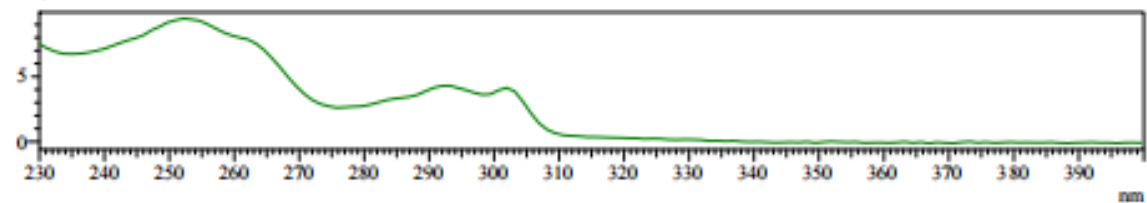

Peak Table

PDA Ch1 254nm

| Peak# | Ret. Time | Area     | Area%   |
|-------|-----------|----------|---------|
| 1     | 15.045    | 12643137 | 78.594  |
| 2     | 17.579    | 267298   | 1.662   |
| 3     | 21.831    | 2776700  | 17.261  |
| 4     | 35.285    | 399426   | 2.483   |
| Total |           | 16086561 | 100.000 |

$^1\text{H}$  NMR of **3s**, 600 MHz,  $\text{CDCl}_3$

7.397  
7.383  
7.368  
7.365  
7.251  
7.239  
7.237  
7.227  
7.213  
7.193  
7.184  
6.996  
6.982  
6.895  
6.882  
6.870  
6.862  
6.848

-3.878

2.363  
2.353  
2.345  
2.340  
2.331

1.759  
1.485  
1.476  
1.470  
1.467  
1.461  
1.325  
1.315  
1.311  
1.307  
1.301  
1.292

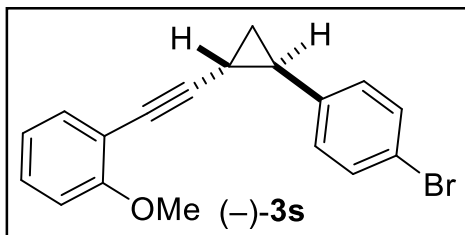

● Minor diastereomer

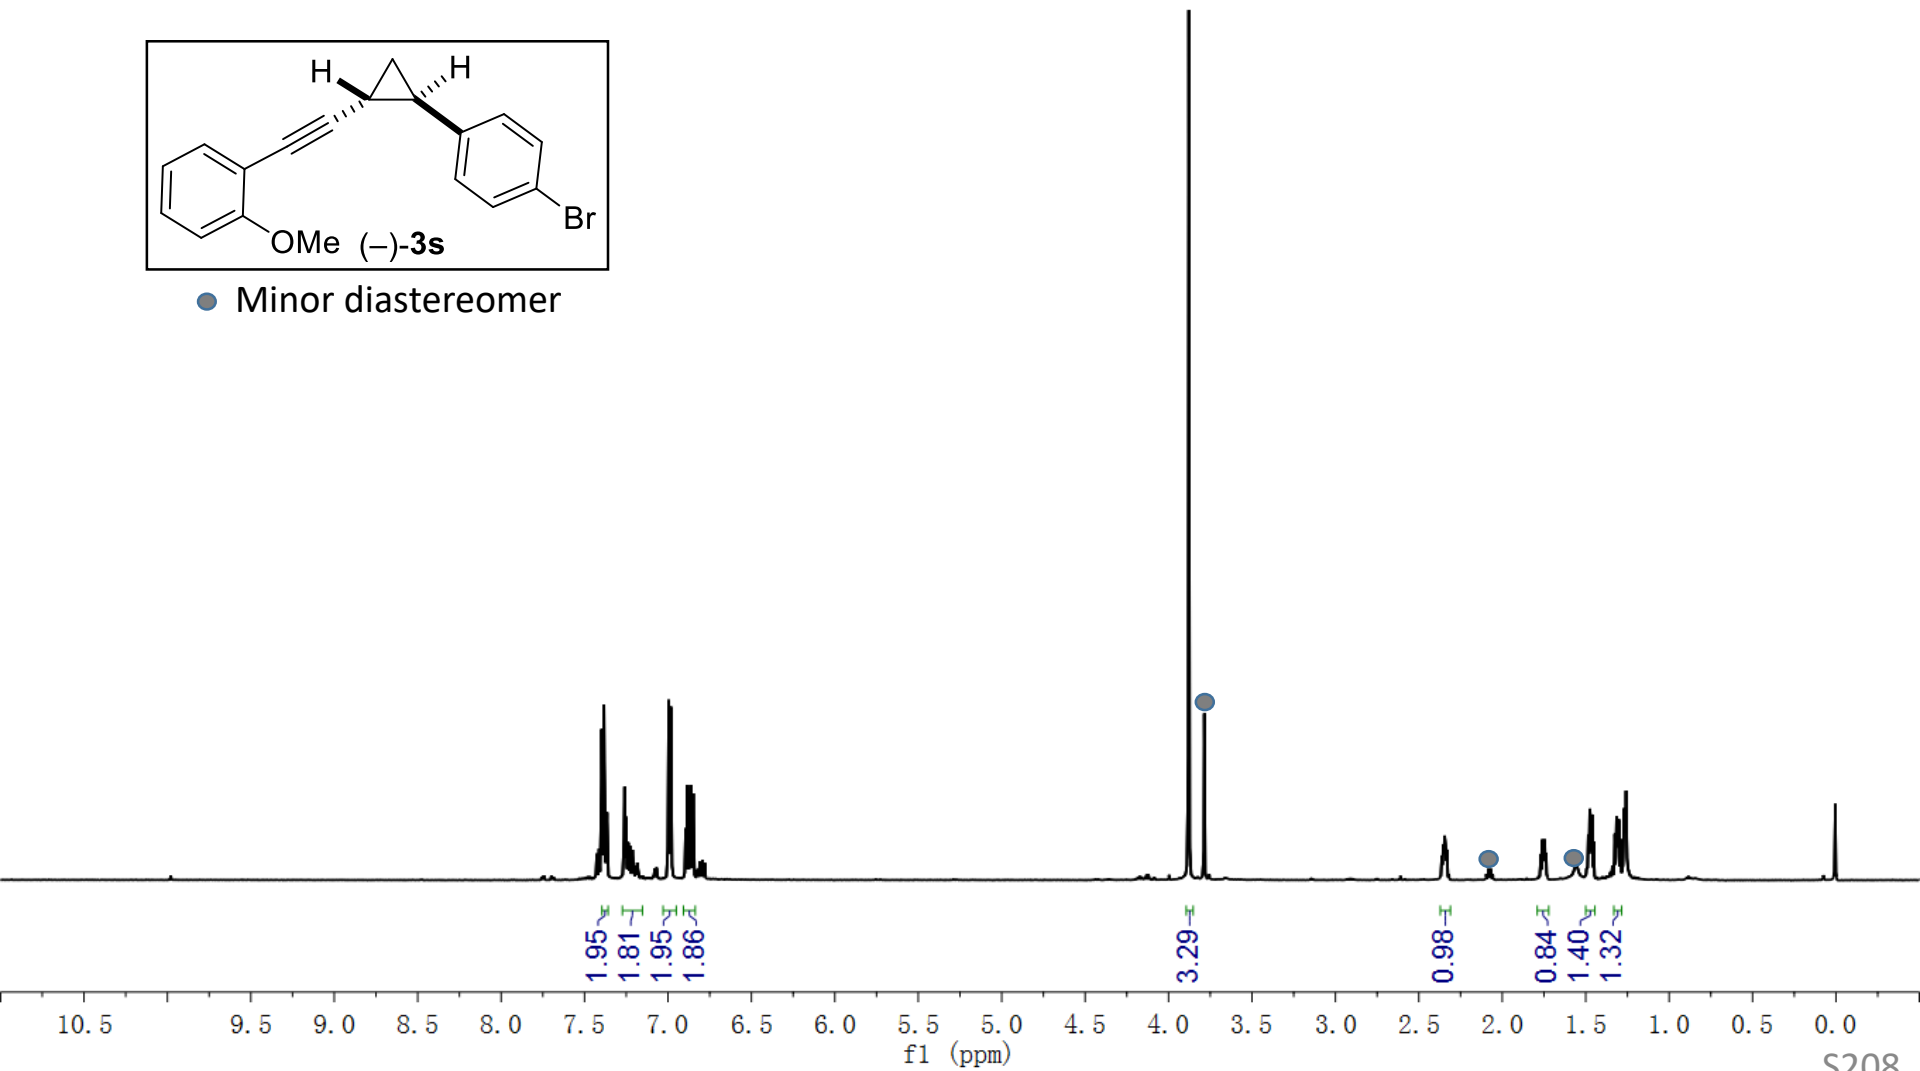



$^{13}\text{C}$  NMR of **3s**, 151 MHz,  $\text{CDCl}_3$

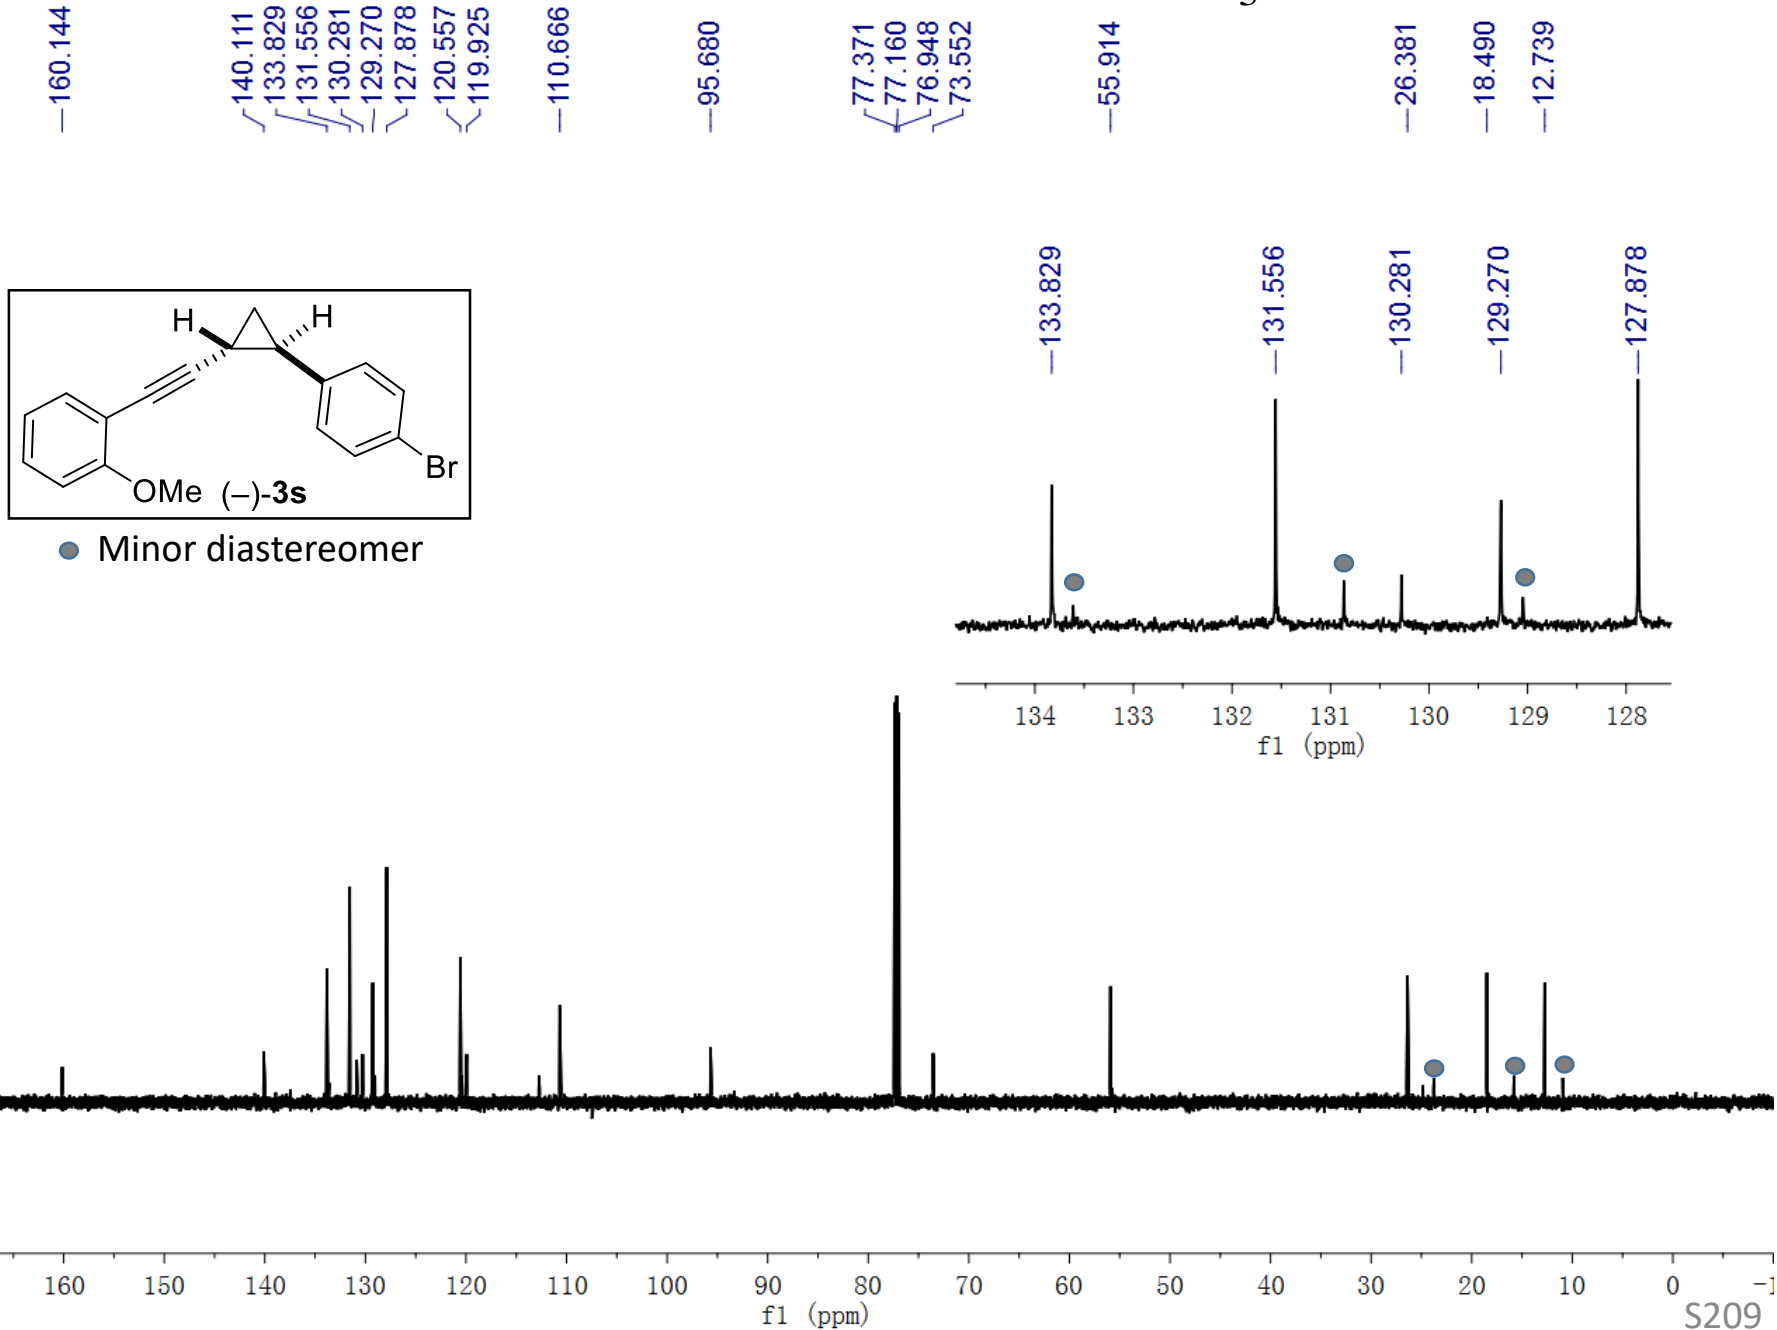

Data File : J0K-1452-IA--0.3%-1ML.lcd  
 Sample Name : J0K-1452-IA--0.3%-1ML  
 Sample ID : J0K-1452-IA--0.3%-1ML  
 Method File : J0K-0.3%-45min-1ml.lcm

Chromatogram

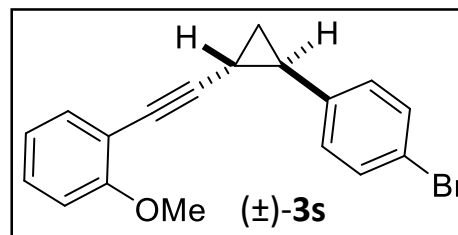

AU

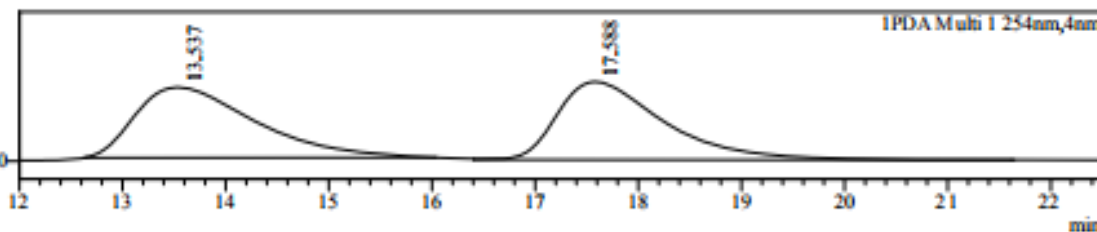

UV Spectrum  
 Retention time = 13.537

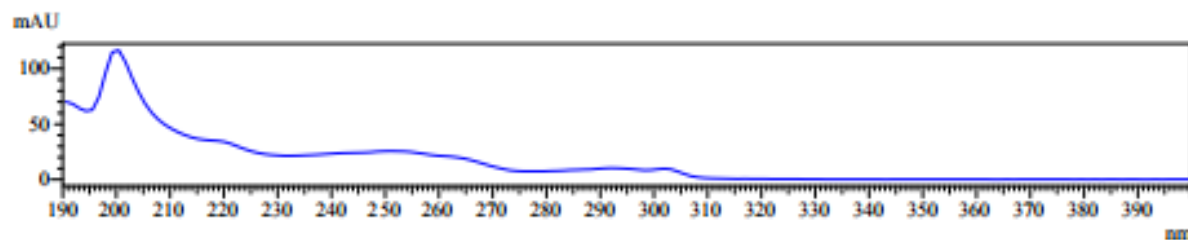

UV  
 Retention time = 17.588

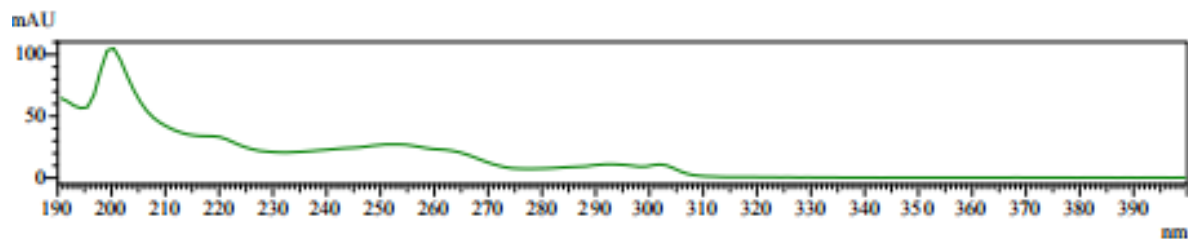

Peak Table

| Peak# | Ret. Time | Area    | Area%   |
|-------|-----------|---------|---------|
| 1     | 13.537    | 1903237 | 50.331  |
| 2     | 17.588    | 1878235 | 49.669  |
| Total |           | 3781472 | 100.000 |

Data File : J0K-1450-IA--0.3%-1ML.lcd  
 Sample Name : J0K-1450-IA--0.3%-1ML  
 Sample ID : J0K-1450-IA--0.3%-1ML  
 Method File : J0K-0.3%--25min-1ml.lcm

Chromatogram

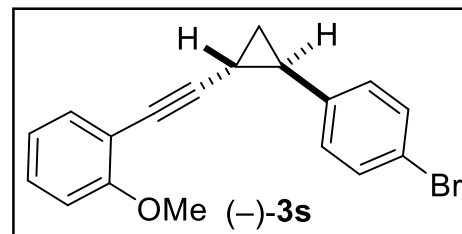

mAU

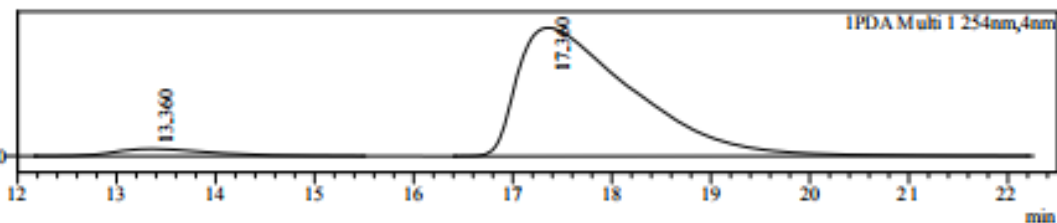

UV Spectrum  
 Retention time = 13.360

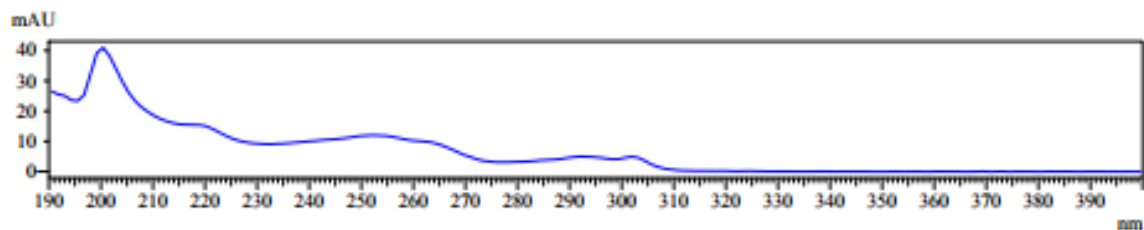

U  
 Retention time = 17.360

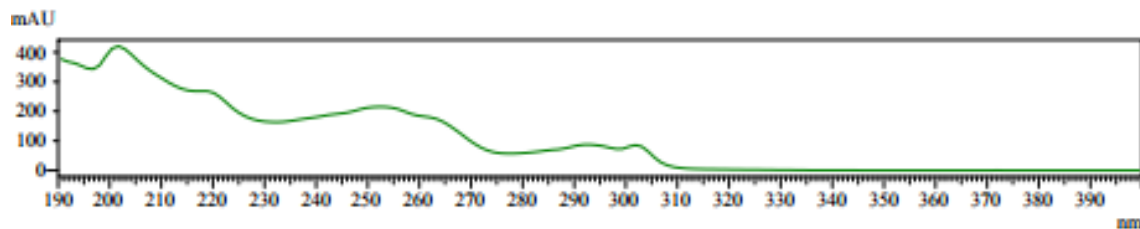

Peak Table

PDA Ch1 254nm

| Peak# | Ret. Time | Area     | Area%   |
|-------|-----------|----------|---------|
| 1     | 13.360    | 804698   | 4.515   |
| 2     | 17.360    | 17019920 | 95.485  |
| Total |           | 17824619 | 100.000 |

# $^1\text{H}$ NMR of **3t**, 600 MHz, $\text{CDCl}_3$

7.805  
7.792  
7.776  
7.762  
7.584  
7.473  
7.460  
7.448  
7.433  
7.422  
7.416  
7.414  
7.403  
7.401  
7.274  
7.271  
7.260  
7.247  
7.245  
6.946  
6.944  
6.933  
6.931  
6.911  
6.898  
6.886  
6.874  
6.860

3.895

3.601

2.589

2.579

2.574

2.571

2.567

2.556

1.905

1.899

1.897

1.891

1.548

1.541

1.539

1.533

1.489

1.485

1.481

1.476

1.475

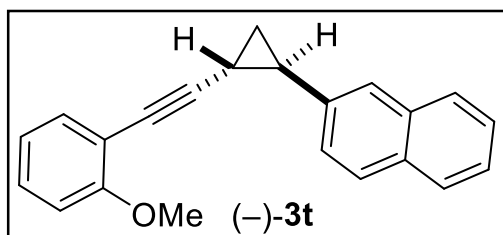

● Minor diastereomer

3.16  
1.00  
3.00  
2.18  
1.96

2.99

0.98

0.88

1.00

1.10

10.5

9.5

9.0

8.5

8.0

7.5

7.0

6.5

6.0

5.5

5.0

4.5

4.0

3.5

3.0

2.5

2.0

1.5

1.0

0.5

0.0

f1 (ppm)

S212

# $^{13}\text{C}$ NMR of **3t**, 151 MHz, $\text{CDCl}_3$

160.165  
138.477  
133.857  
133.566  
132.333  
129.180  
128.190  
127.753  
127.530  
126.287  
125.434  
124.817  
124.512  
120.557  
112.913  
110.679

96.182

77.372  
77.160  
76.948  
73.375

55.926

27.162

18.413

12.621

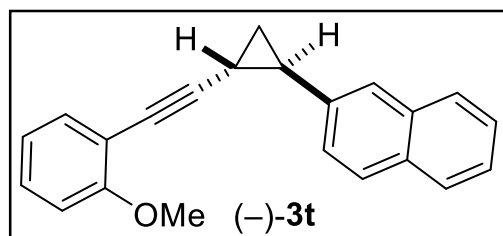

● Minor diastereomer

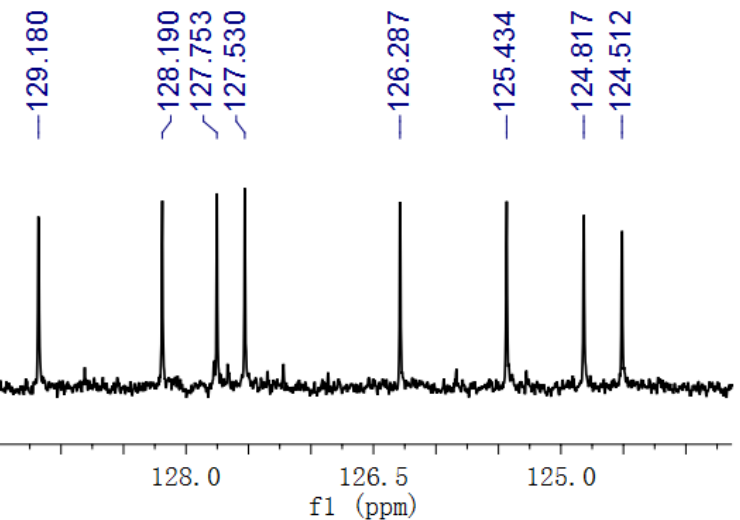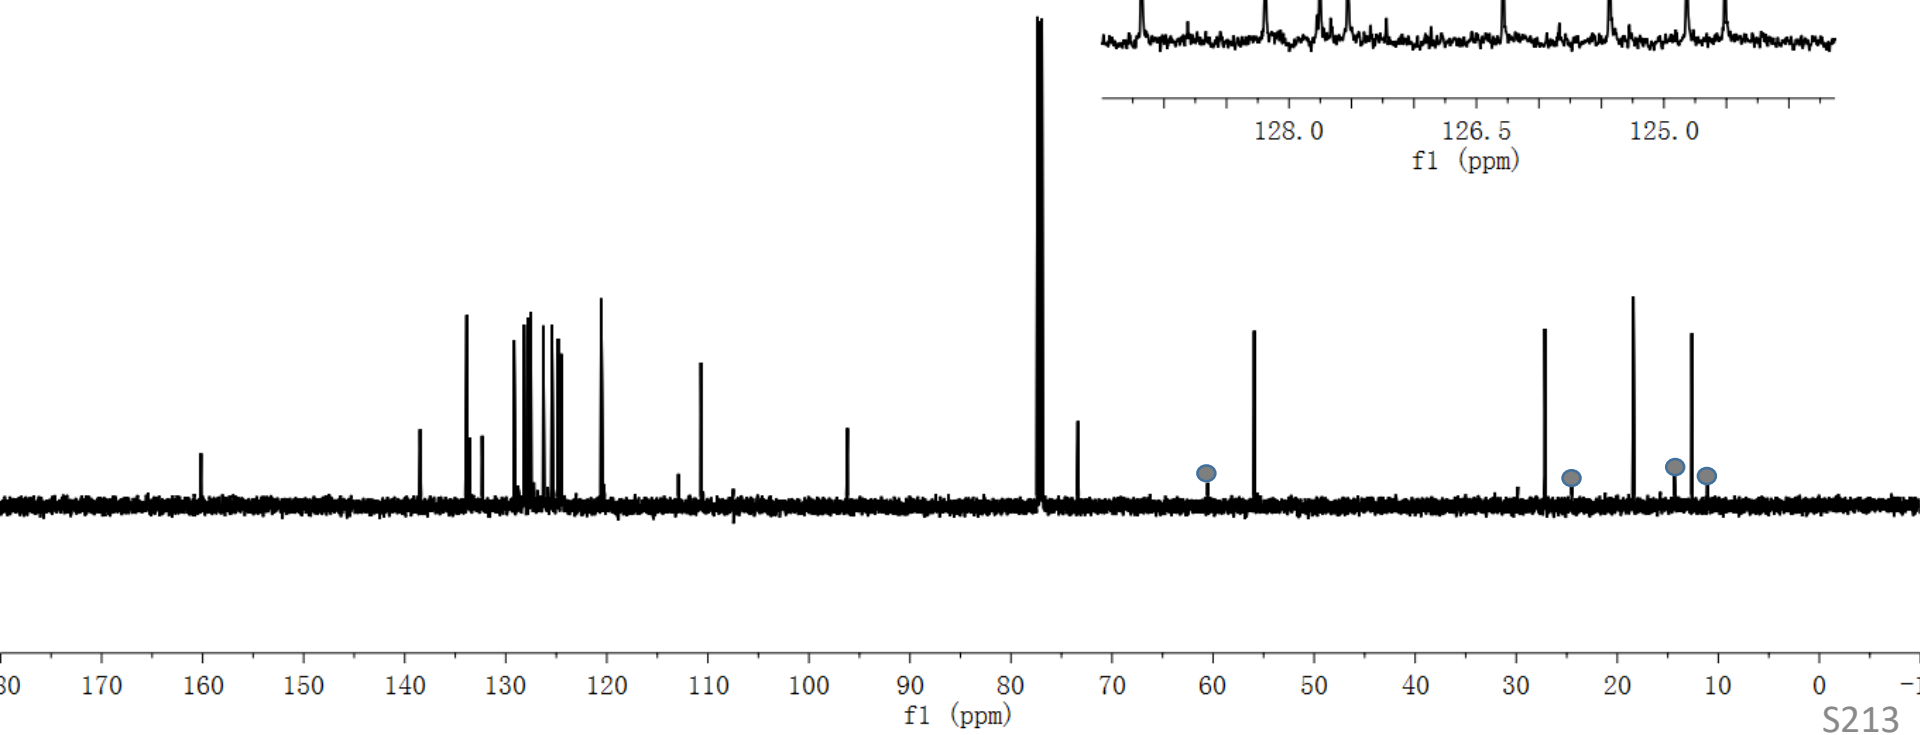

Data File : JOK-0340-IC-1%-0.8ML-isopropanol-solvent005.lcd  
 Sample Name : JOK-0340-IC-1%-0.8ML-isopropanol-solvent005  
 Sample ID : JOK-0340-IC-1%-0.8ML-iso propano  
 Method File : JOK-1%-0.8ml-50min.lcm

Chromatogram

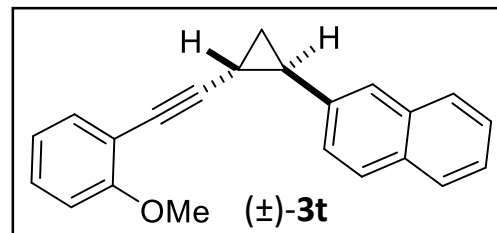

mAU

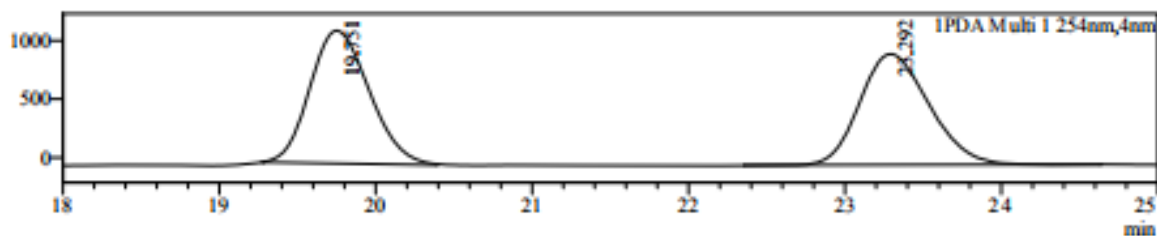

UV Spectrum  
 Retention time = 19.751

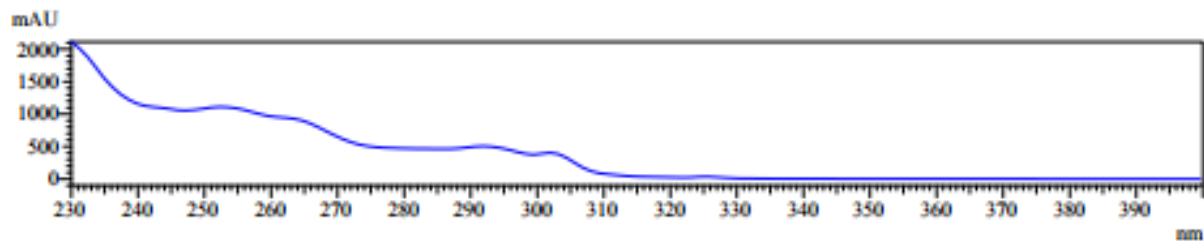

J  
 Retention time = 23.292

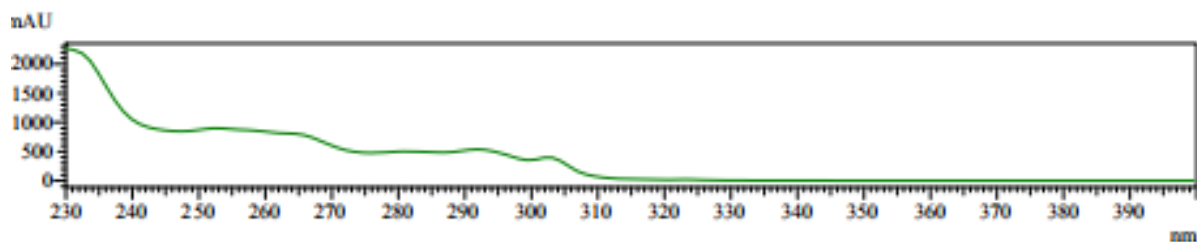

Peak Table

| PDA Ch1 254nm |           |          |         |
|---------------|-----------|----------|---------|
| Peak#         | Ret. Time | Area     | Area%   |
| 1             | 19.751    | 29870447 | 50.717  |
| 2             | 23.292    | 29025910 | 49.283  |
| Total         |           | 58896357 | 100.000 |

Data File : J0K-0336-2-IC-1%-0.8ML-isopropanol-solvent005.lcd  
 Sample Name : J0K-0336-2-IC-1%-0.8ML-isopropanol-solvent005  
 Sample ID : J0K-0336-2-IC-1%-0.8ML-isopropa  
 Method File : J0K-1%-0.8ml-50min.lcm

Chromatogram

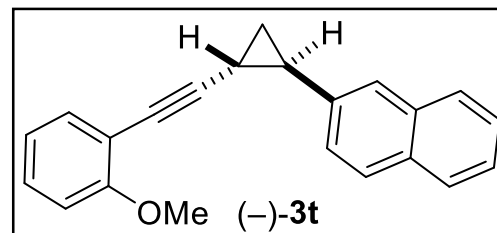

mAU

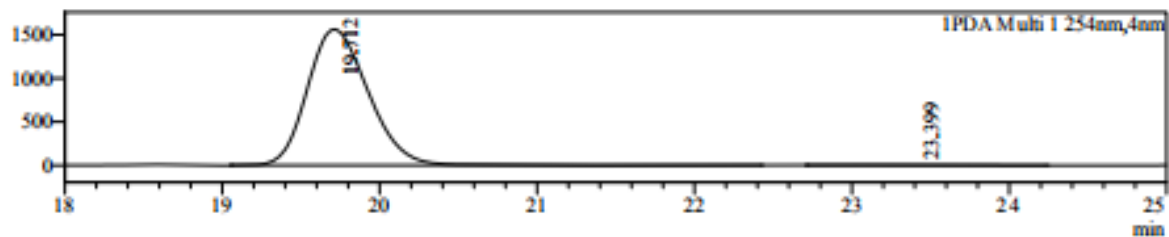

UV Spectrum  
 Retention time = 19.712

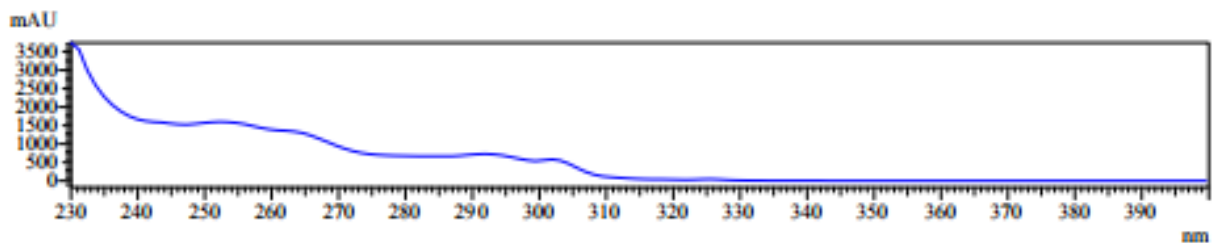

U  
 Retention time = 23.399

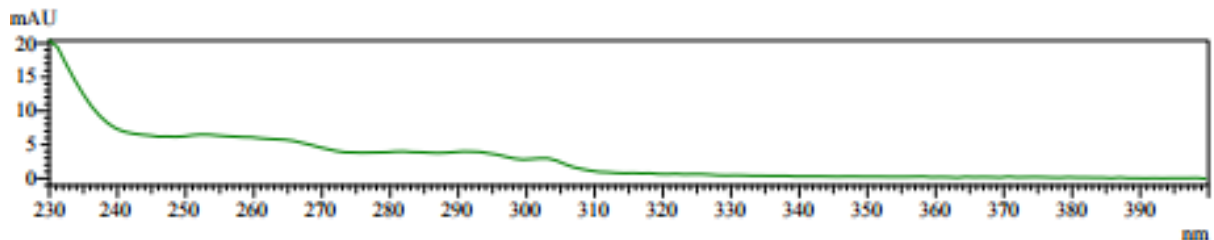

Peak Table

| PDA Ch1 254nm |           |          |         |
|---------------|-----------|----------|---------|
| Peak#         | Ret. Time | Area     | Area%   |
| 1             | 19.712    | 41874366 | 99.587  |
| 2             | 23.399    | 173574   | 0.413   |
| Total         |           | 42047940 | 100.000 |

$^1\text{H}$  NMR of **3u**, 600 MHz,  $\text{CDCl}_3$

7.383  
7.370  
7.260  
7.249  
7.234  
7.087  
7.078  
6.910  
6.903  
6.895  
6.894  
6.881  
6.868  
6.858  
6.844  
6.832  
6.831  
6.829  
6.827  
6.825

3.876

2.587  
2.578  
2.571  
2.564  
2.555

1.828  
1.821  
1.498  
1.493  
1.490  
1.483  
1.365  
1.356  
1.351  
1.350  
1.348  
1.347  
1.342

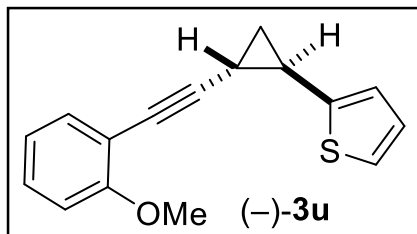

● Minor diastereomer

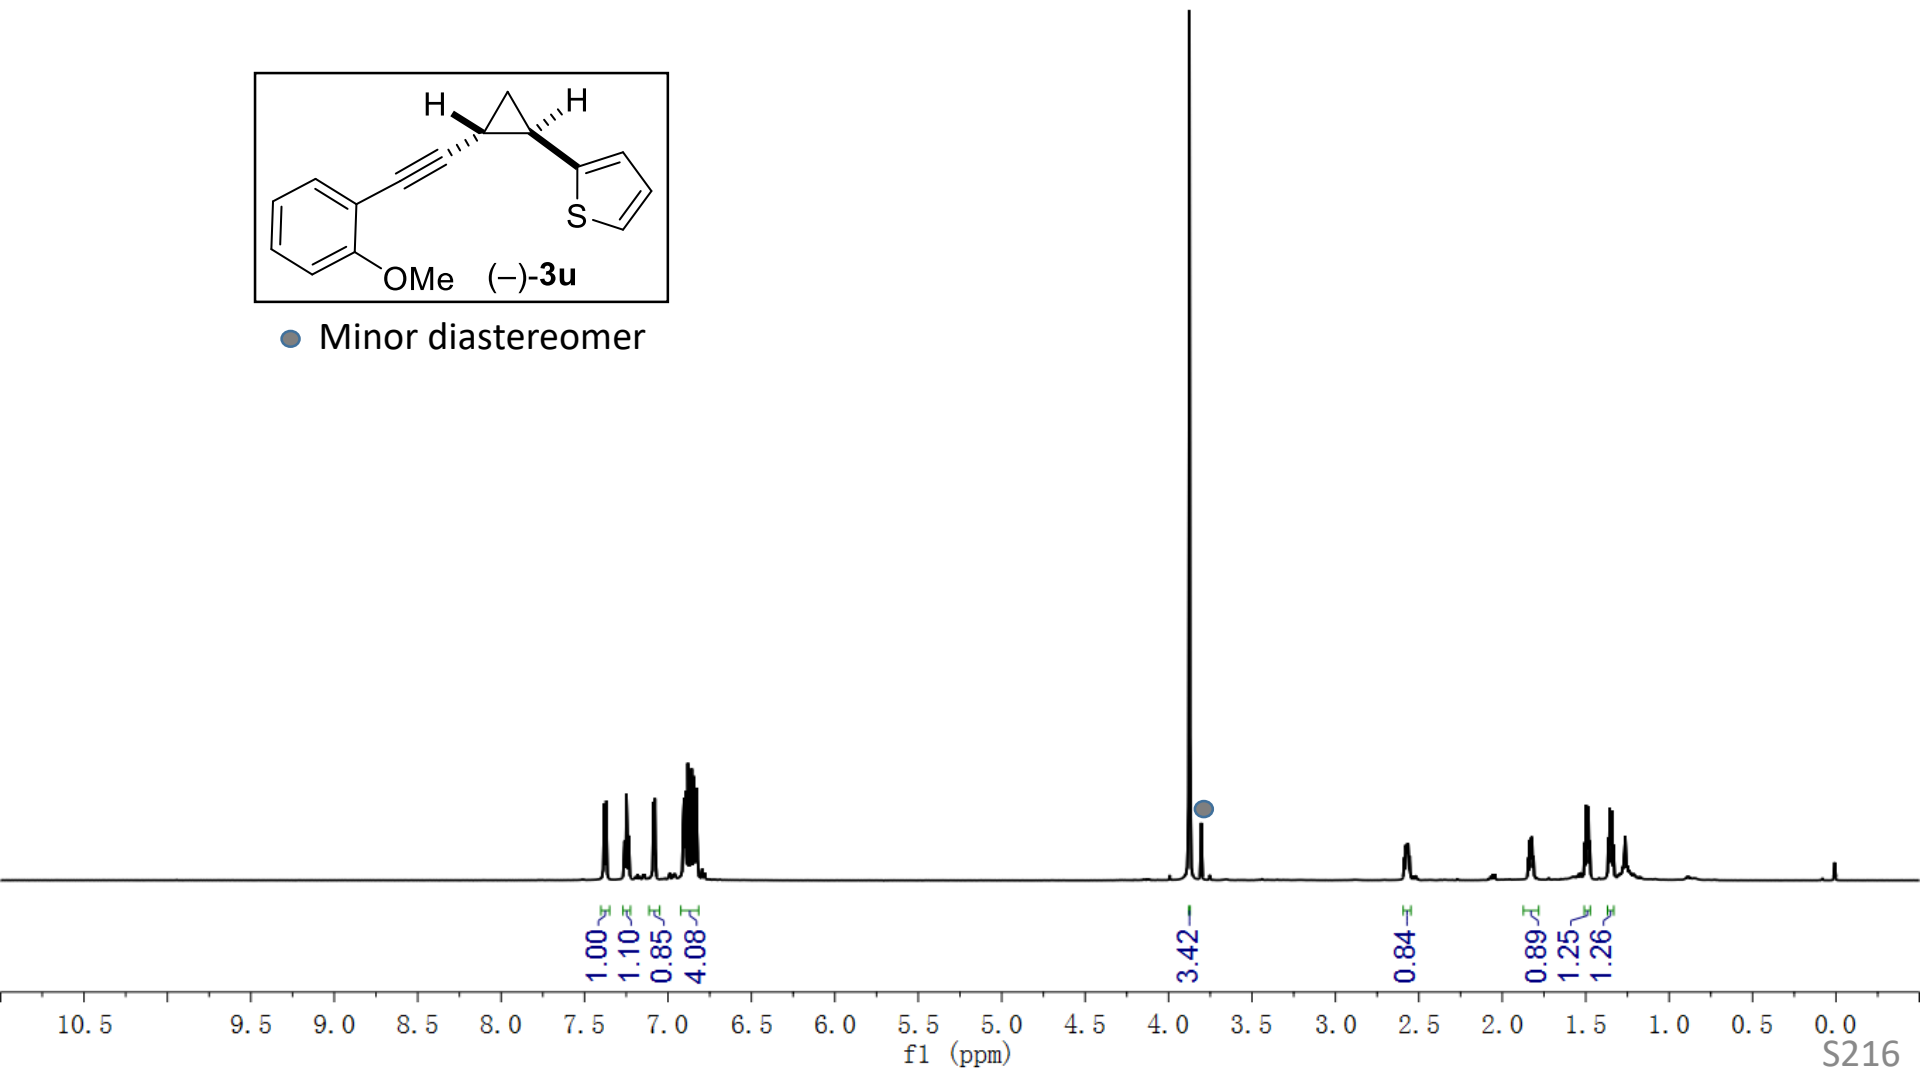



<sup>13</sup>C NMR of **3u**, 151 MHz, CDCl<sub>3</sub>

—160.117  
—145.236  
133.817  
129.237  
126.934  
123.638  
122.921  
120.526  
112.728  
110.640  
—95.448  
77.371  
77.160  
76.948  
73.782  
—55.879  
22.243  
19.347  
13.437

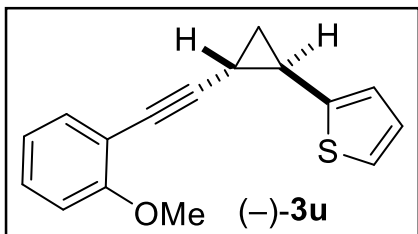

● Minor diastereomer

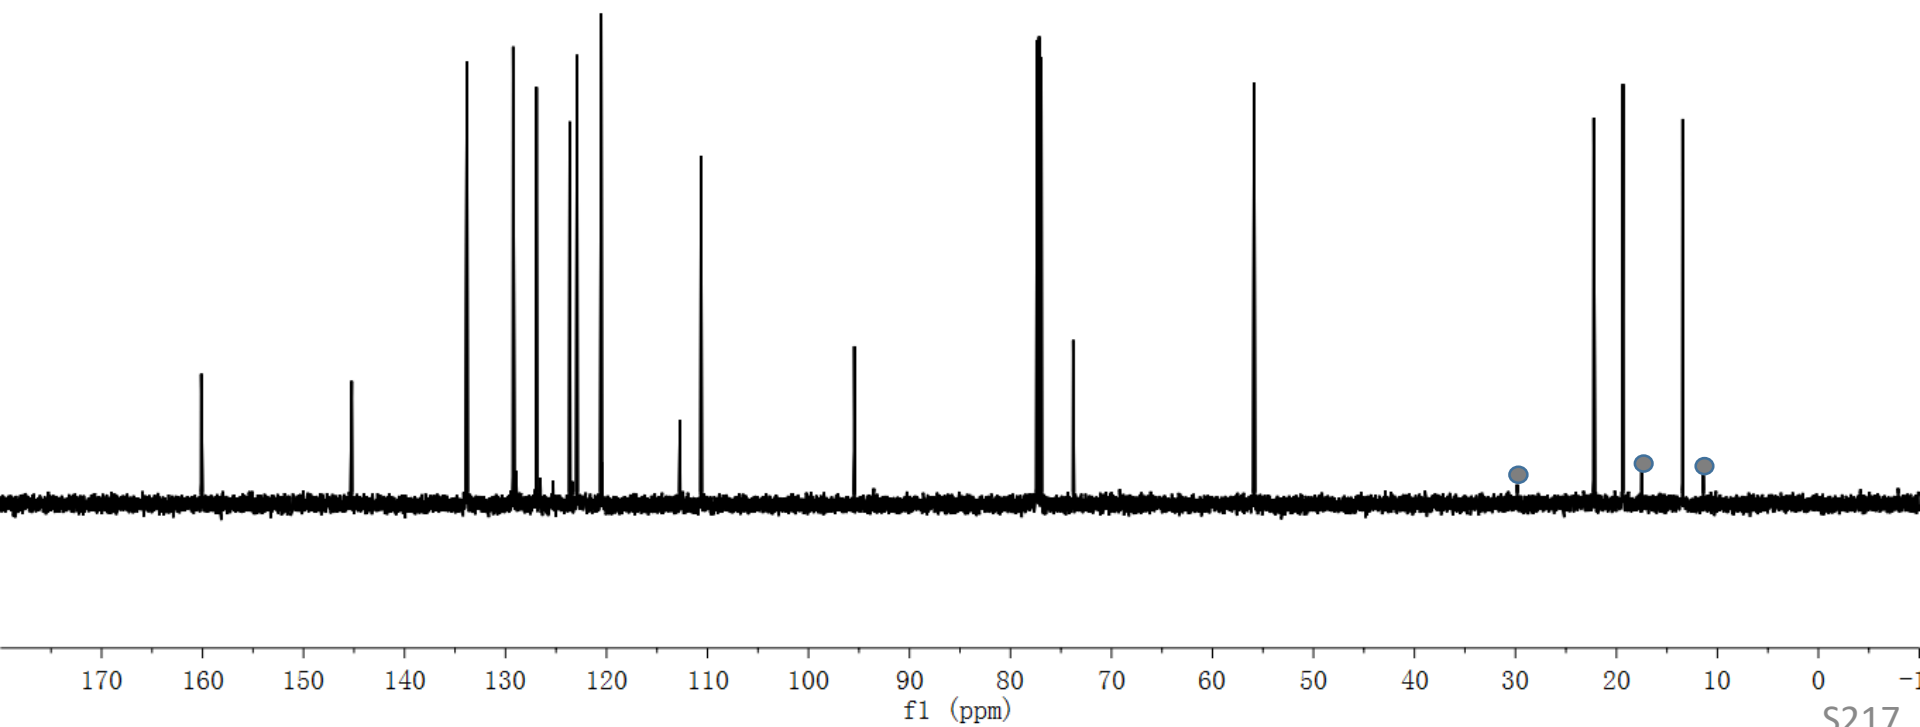

Data File : JOK-0589-4-IC-0.5%-0.8ML.lcd  
 Sample Name : JOK-0589-4-IC-0.5%-0.8ML  
 Sample ID : JOK-0589-4-IC-0.5%-0.8ML  
 Method File : JOK-0.5%--60min-0.8ml.lcm

Chromatogram

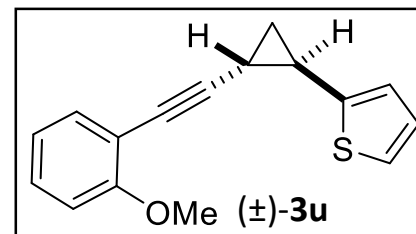

mAU

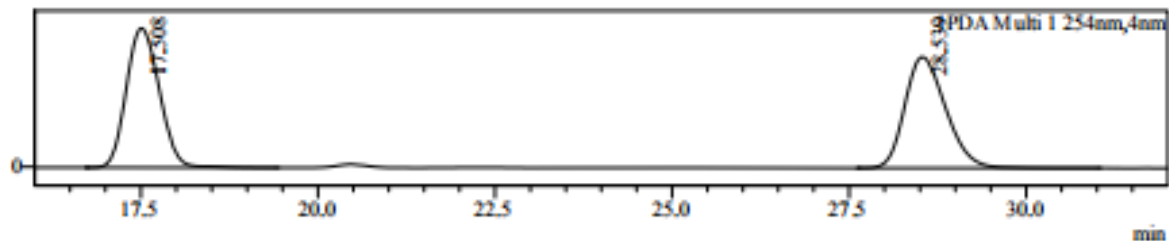

UV Spectrum  
 Retention time = 17.508

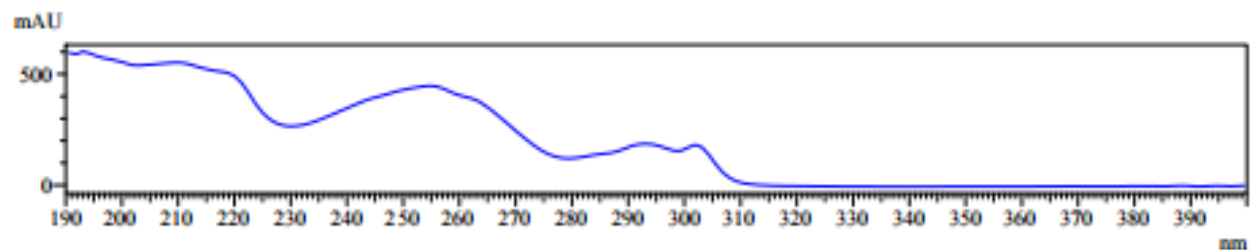

Retention time = 28.539

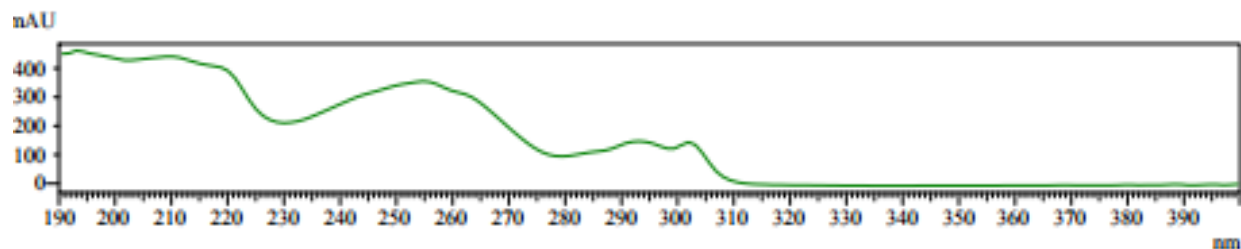

Peak Table

PDA Ch1 254nm

| Peak# | Ret. Time | Area     | Area%   |
|-------|-----------|----------|---------|
| 1     | 17.508    | 14384167 | 50.400  |
| 2     | 28.539    | 14155965 | 49.600  |
| Total |           | 28540132 | 100.000 |

Data File : JOK-0588-4-IC-0.5%-0.8ML.lcd  
 Sample Name : JOK-0588-4-IC-0.5%-0.8ML  
 Sample ID : JOK-0588-4-IC-0.5%-0.8ML  
 Method File : JOK-0.5%-60min-0.8ml.lcm

Chromatogram

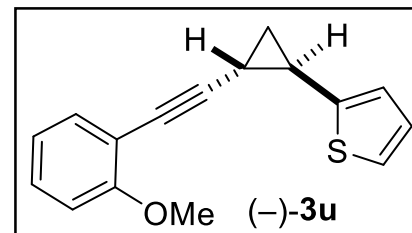

mAU

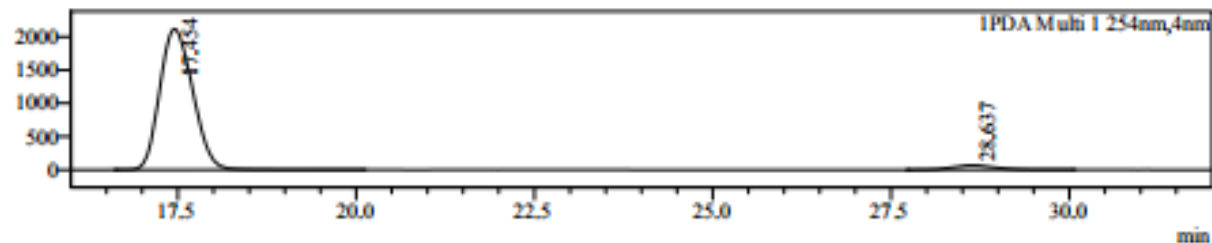

UV Spectrum

Retention time = 17.454

mAU

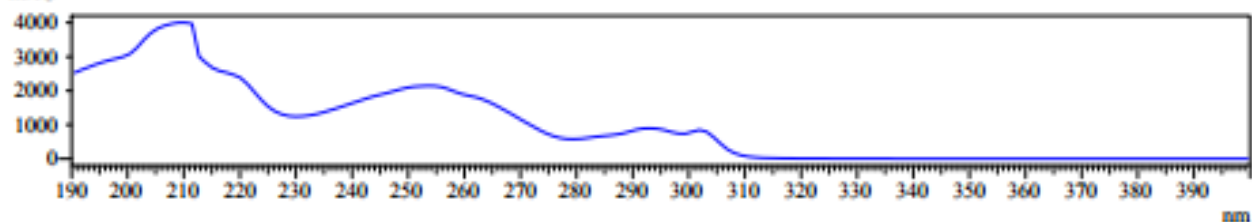

U

Retention time = 28.637

mAU

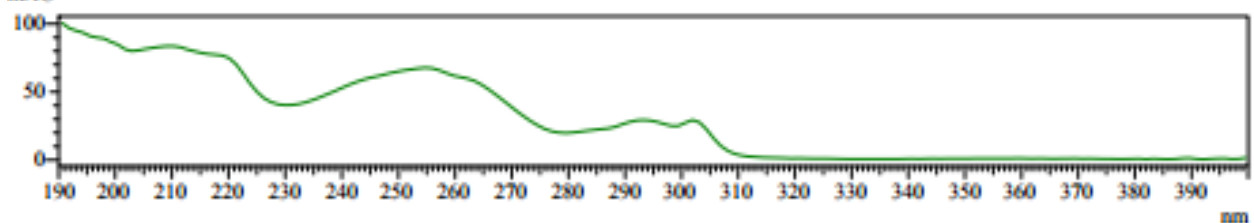

Peak Table

PDA Ch1 254nm

| Peak# | Ret. Time | Area     | Area%   |
|-------|-----------|----------|---------|
| 1     | 17.454    | 68120738 | 96.222  |
| 2     | 28.637    | 2674806  | 3.778   |
| Total |           | 70795544 | 100.000 |

$^1\text{H}$  NMR of **3v**, 600 MHz,  $\text{CDCl}_3$

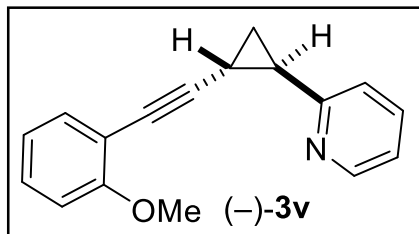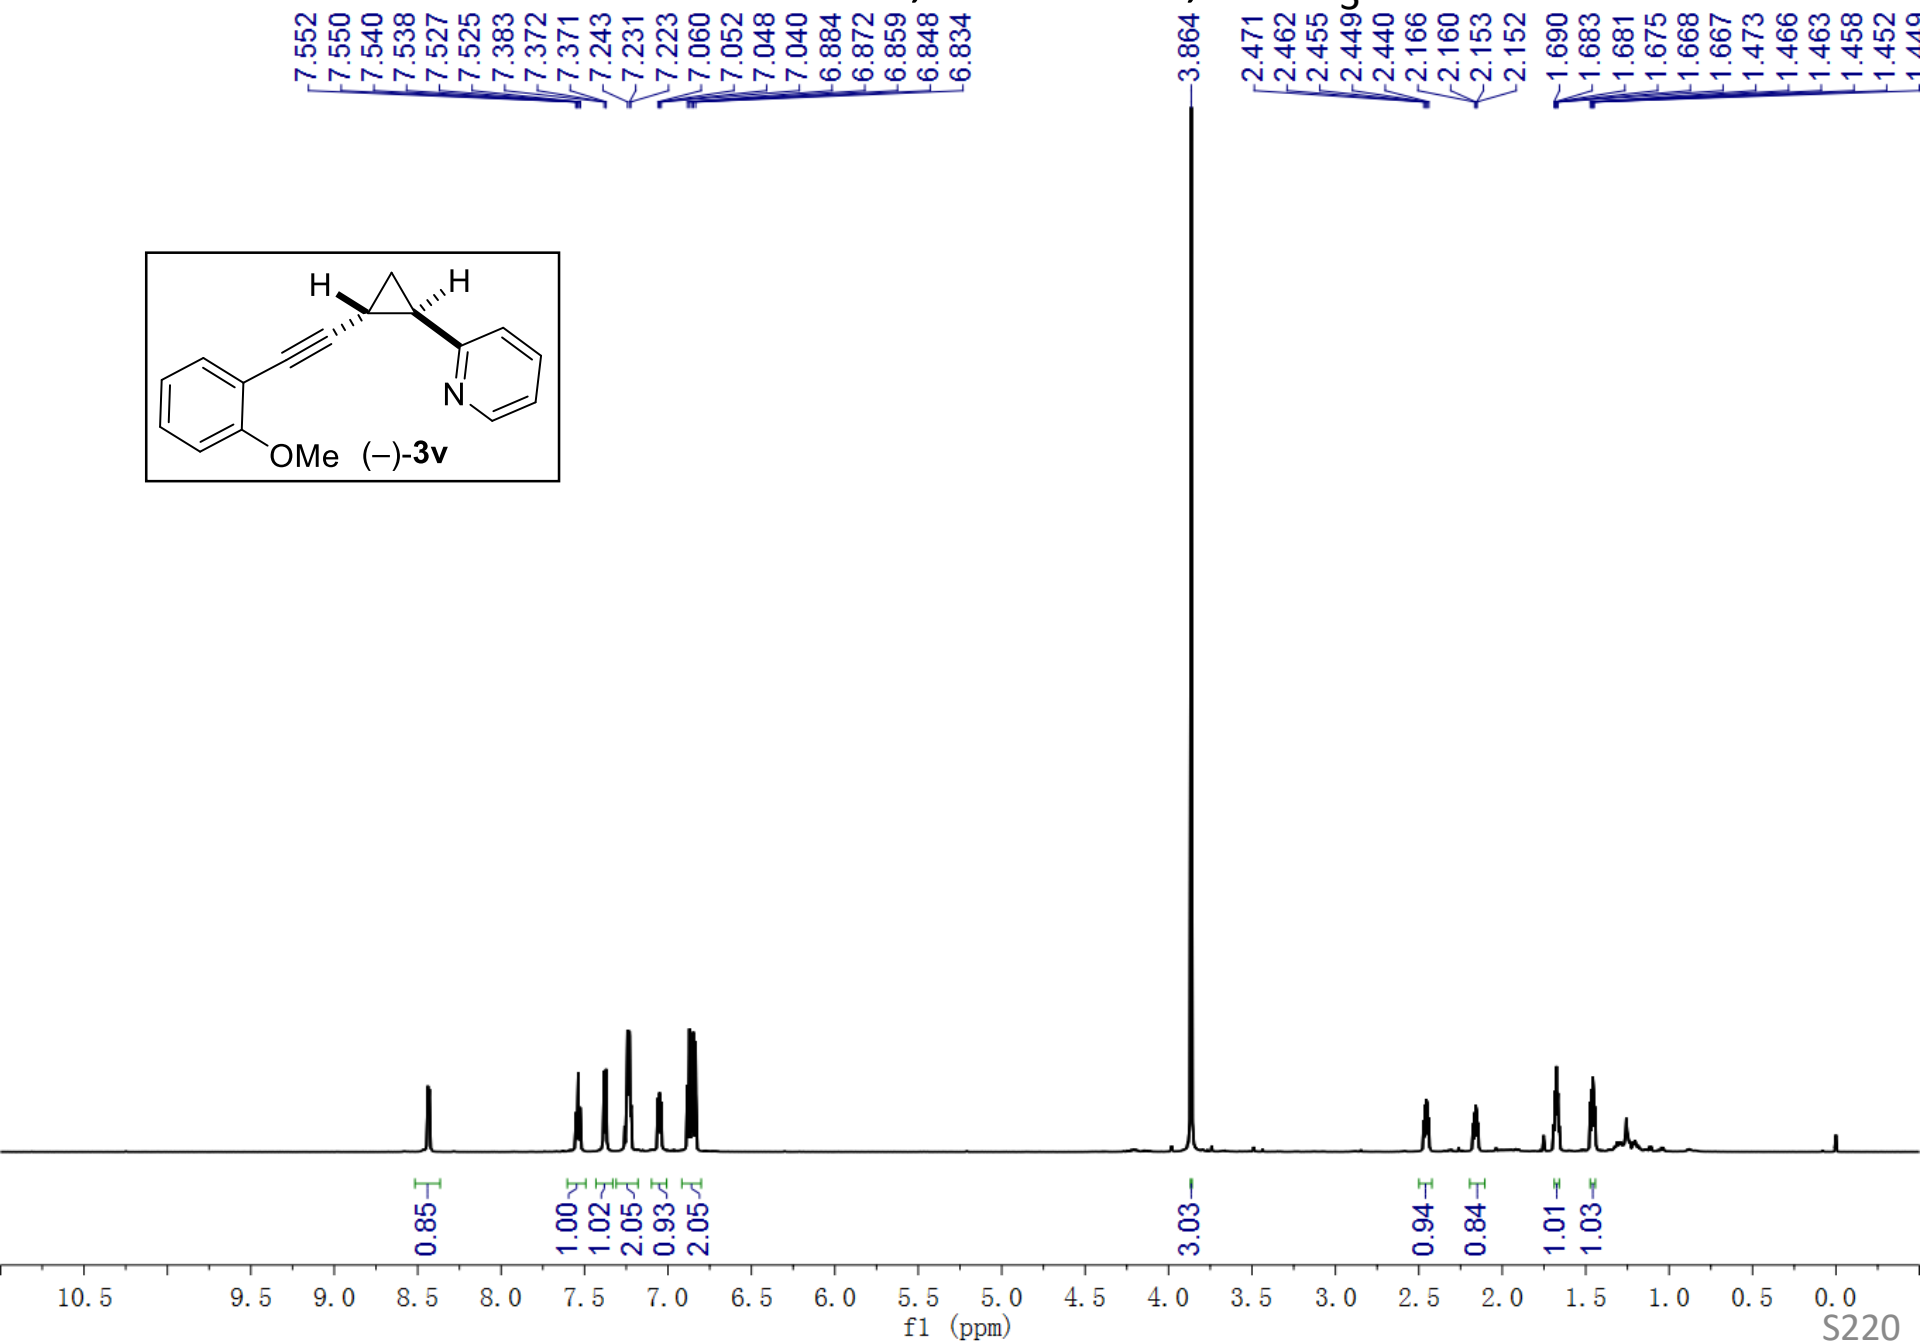

<sup>13</sup>C NMR of **3v**, 151 MHz, CDCl<sub>3</sub>

160.126  
159.602

149.451

135.942

133.845

129.126

122.555

121.065

120.495

112.872

110.622

96.103

77.371

77.160

76.948

73.159

55.862

28.015

19.063

12.944

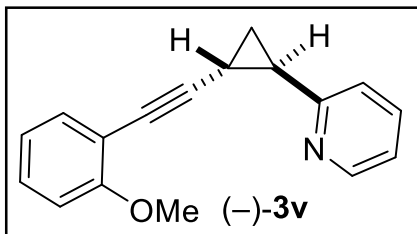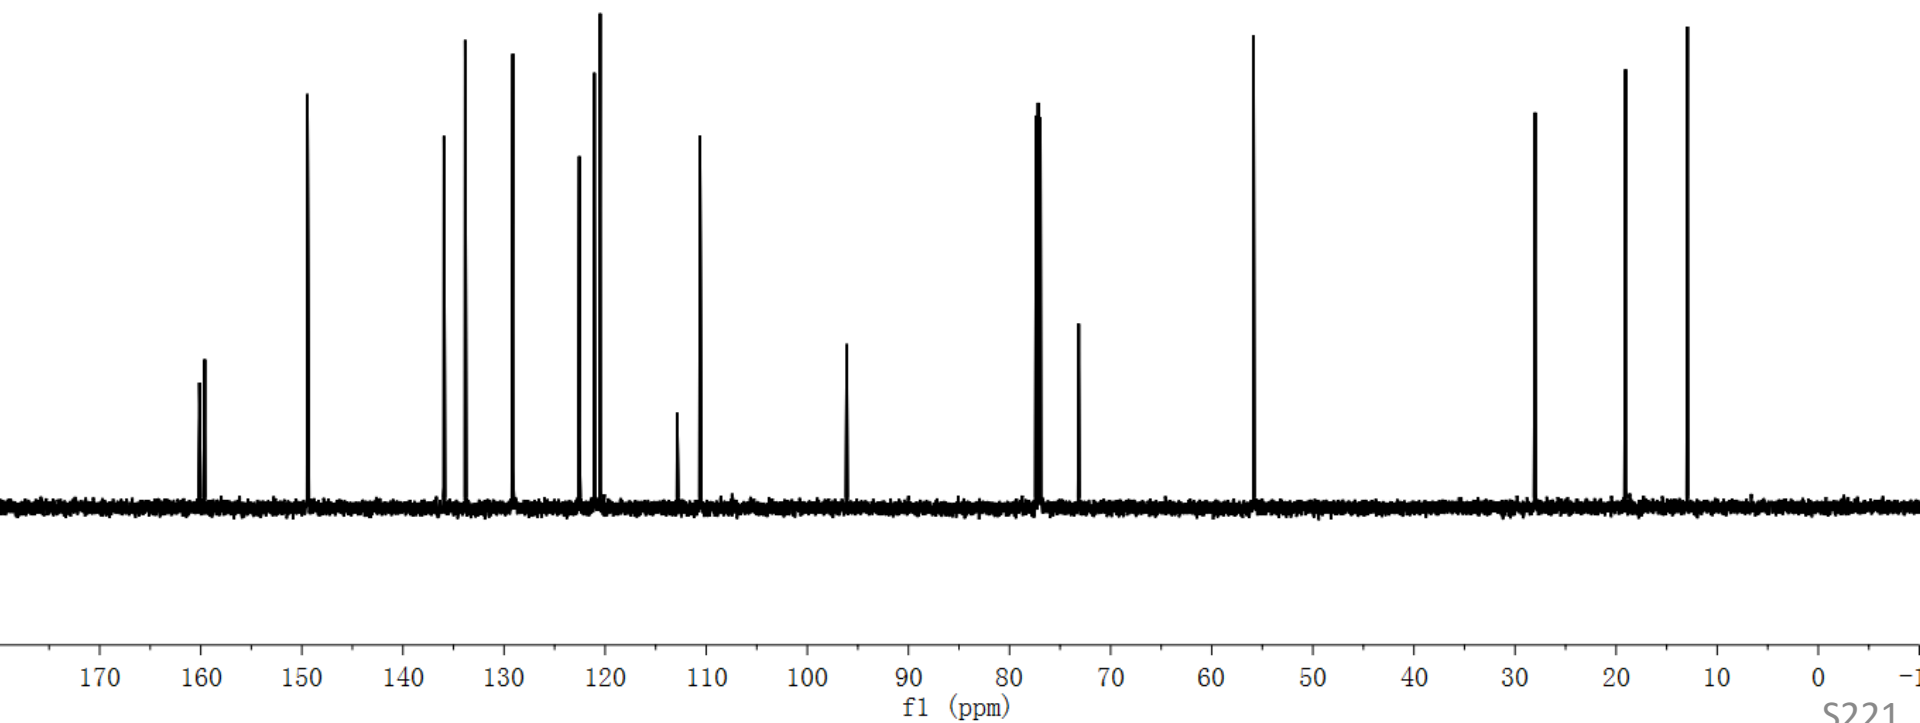

Data File : JOK-0600-2-IC-0.5%-1ML.lcd  
 Sample Name : JOK-0600-2-IC-0.5%-1ML  
 Sample ID : JOK-0600-2-IC-0.5%-1ML  
 Method File : JOK-0.5%-80min-1ml.lcm

Chromatogram

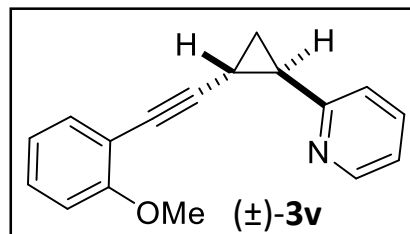

mAU

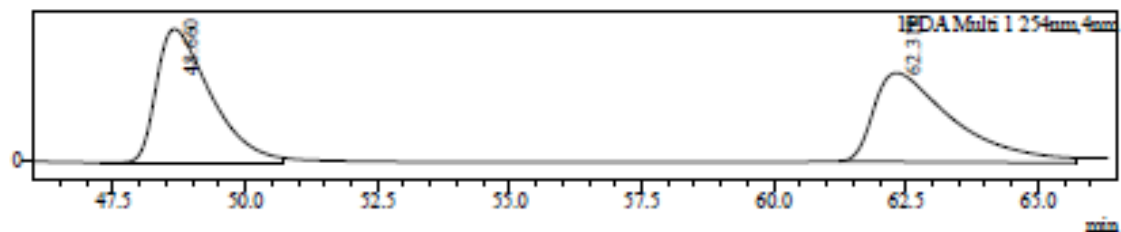

UV Spectrum  
 Retention time = 48.660

mAU

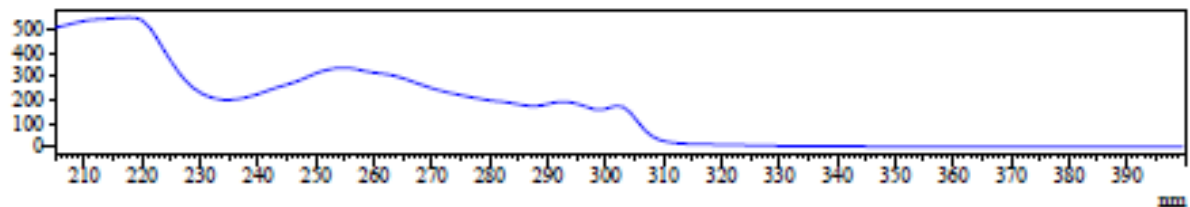

UV Spectrum  
 Retention time = 62.317

mAU

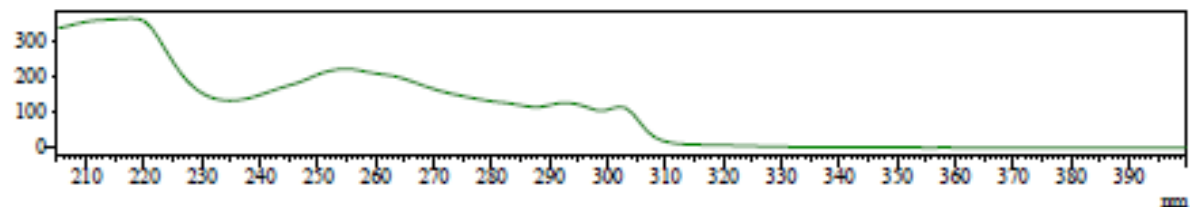

Peak Table

PDA Ch1 254nm

| Peak# | Ret. Time | Area     | Area%   |
|-------|-----------|----------|---------|
| 1     | 48.660    | 24316400 | 50.828  |
| 2     | 62.317    | 23524334 | 49.172  |
| Total |           | 47840733 | 100.000 |

Data File : J0K-0599--2-IC--0.5%-1ML.lcd  
 Sample Name : J0K-0599--2-IC--0.5%-1ML  
 Sample ID : J0K-0599--2-IC--0.5%-1ML  
 Method File : J0K-0.5%-80min-1ml.lcm

Chromatogram

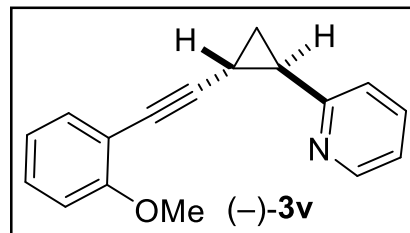

mAU

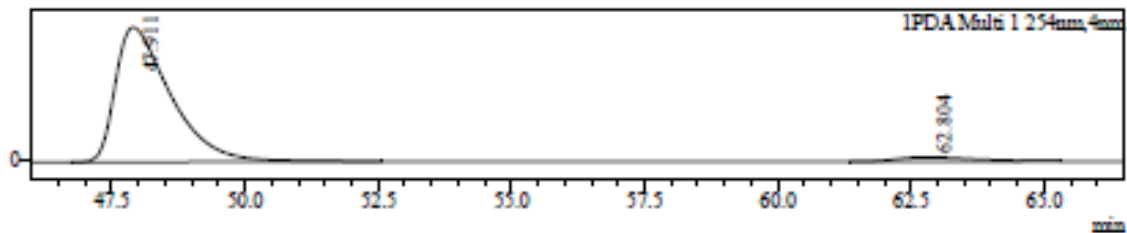

UV Spectrum  
 Retention time = 47.911

mAU

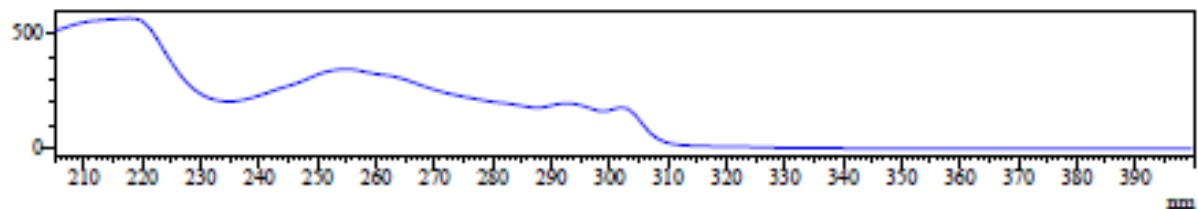

UV Spectrum  
 Retention time = 62.804

mAU

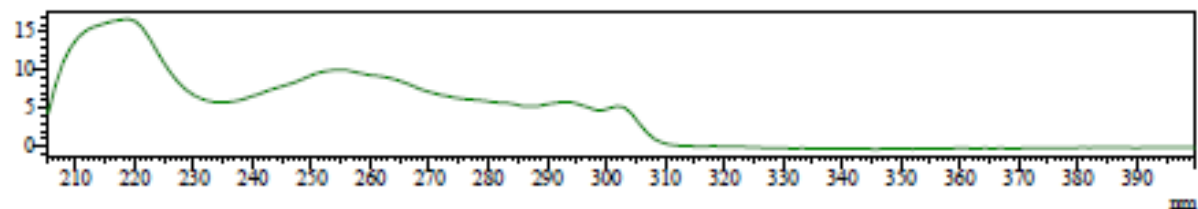

Peak Table

PDA Ch1 254nm

| Peak# | Ret. Time | Area     | Area%   |
|-------|-----------|----------|---------|
| 1     | 47.911    | 24636457 | 95.788  |
| 2     | 62.804    | 1083431  | 4.212   |
| Total |           | 25719888 | 100.000 |

# $^1\text{H}$ NMR of **3w**, 600 MHz, $\text{CDCl}_3$

8.028  
8.014  
7.863  
7.849  
7.836  
7.445  
7.433  
7.432  
7.420  
7.383  
7.372  
7.360  
7.278  
7.276  
7.264  
7.023  
6.917  
6.905  
6.892  
6.880  
6.866

3.900  
2.550  
2.547  
2.545  
2.543  
2.542  
2.539  
2.536  
2.527

1.797  
1.783  
1.512  
1.505  
1.497  
1.392  
1.384  
1.381  
1.377  
1.374  
1.369  
1.368  
1.359

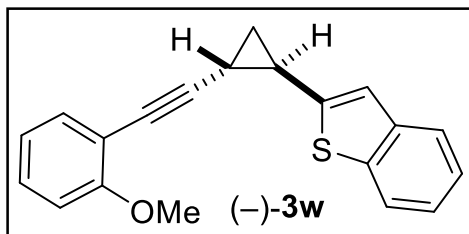

● Minor diastereomer

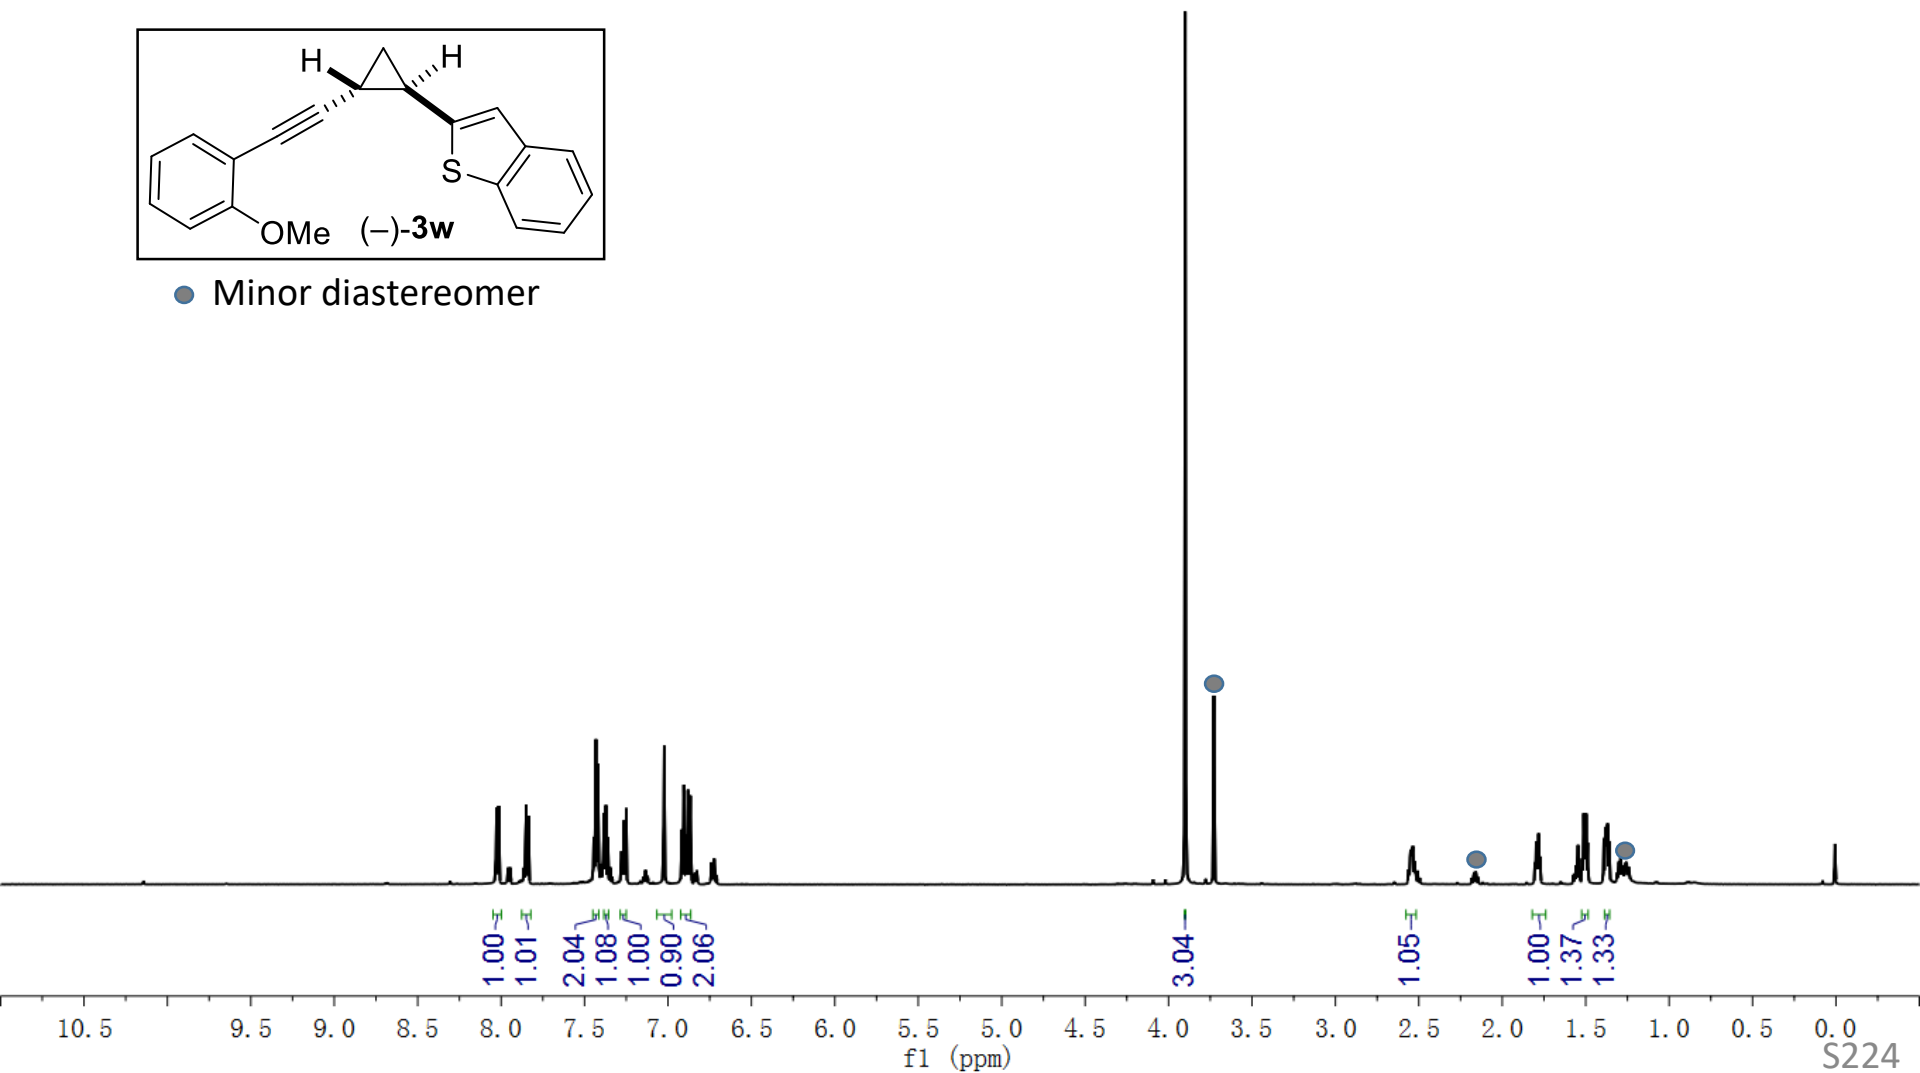



$^{13}\text{C}$  NMR of **3w**, 151 MHz,  $\text{CDCl}_3$

160.221

140.486

139.614

136.328

133.853

129.226

124.711

124.248

122.918

122.337

120.906

120.561

112.905

110.717

96.105

77.372

77.160

76.949

73.381

55.937

20.874

16.424

10.073

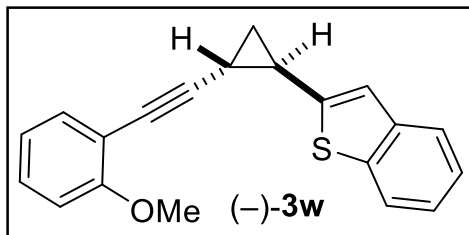

● Minor diastereomer

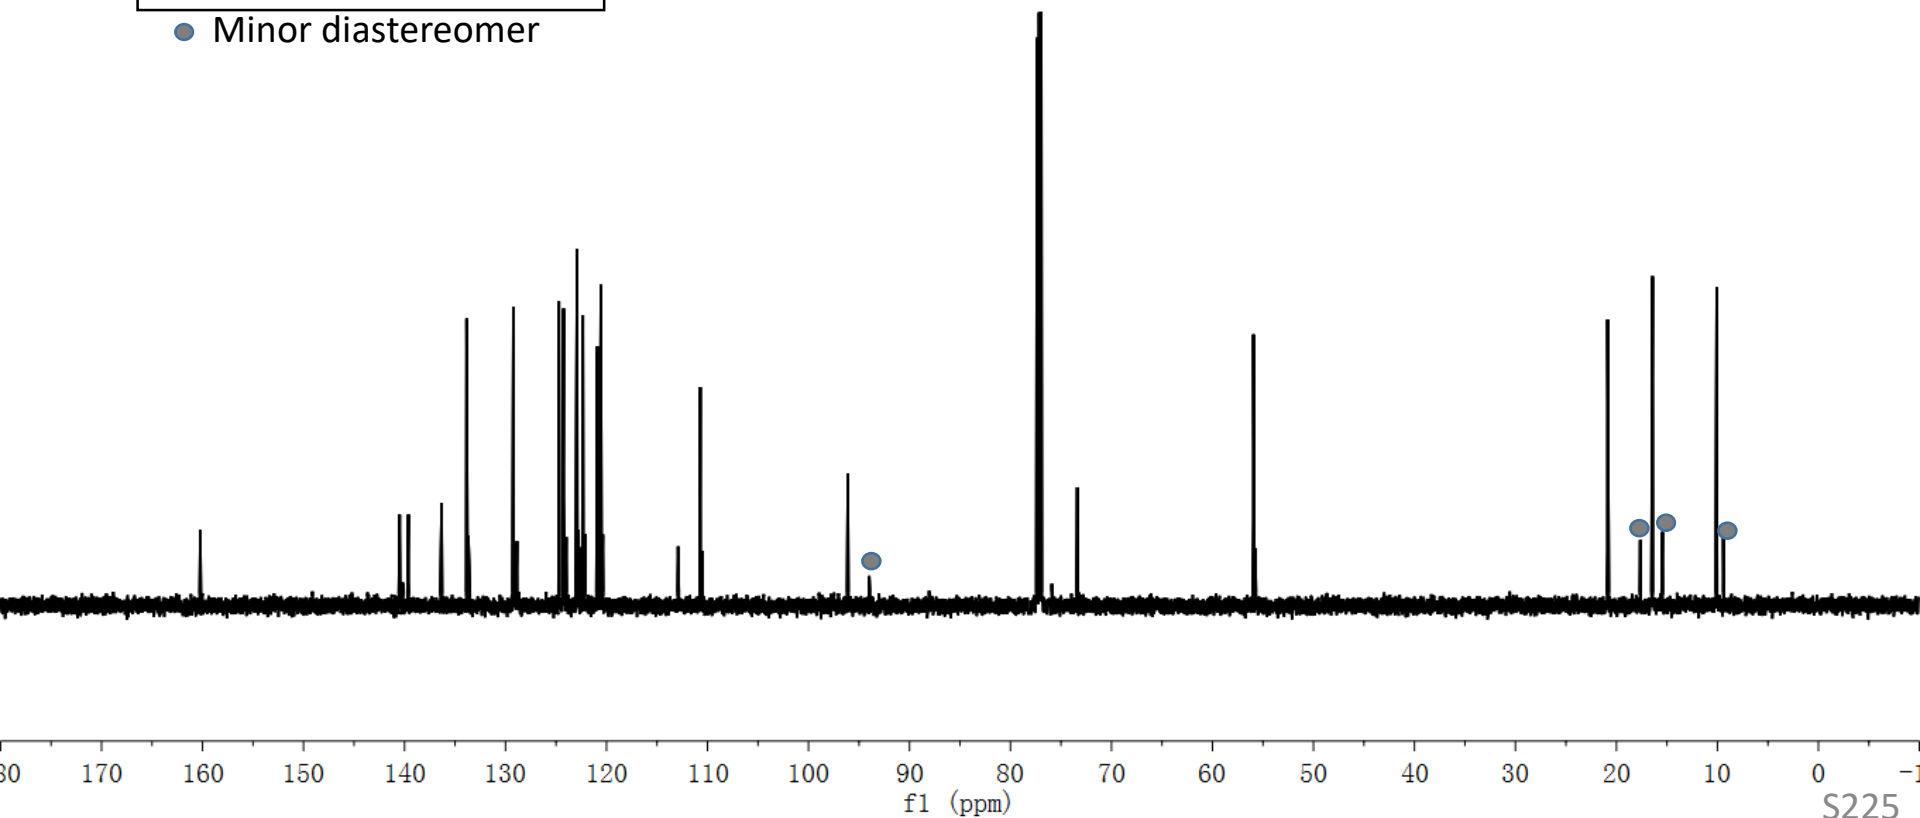

Data File : J0K-0587-3-IC-0.5%-0.8mL.lcd  
 Sample Name : J0K-0587-3-IC-0.5%-0.8mL  
 Sample ID : J0K-0587-3-IC-0.5%-0.8mL  
 Method File : J0K-0.5%-60min-0.8ml.lcm

Chromatogram

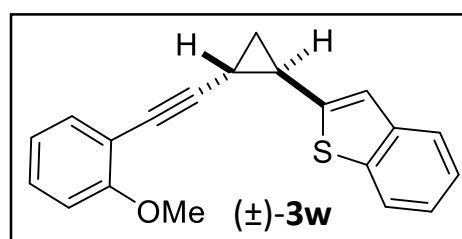

mAU

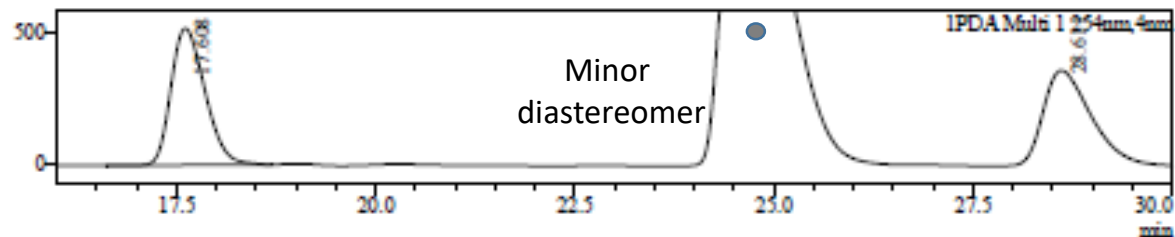

UV Spectrum  
Retention time = 17.608

mAU

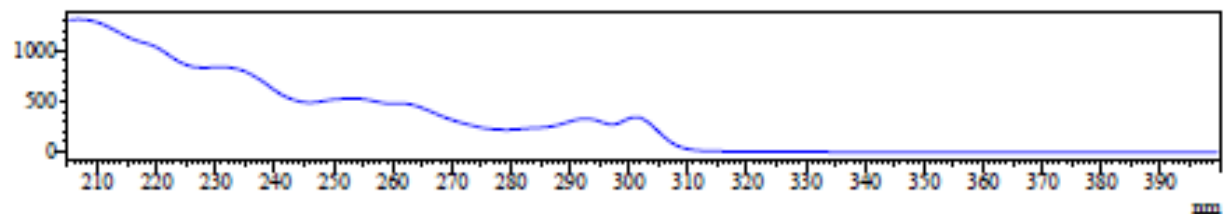

UV Spectrum  
Retention time = 28.611

mAU

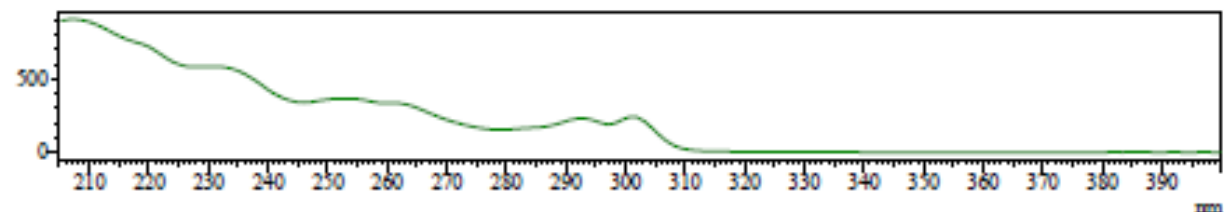

Peak Table

PDA Ch1 254nm

| Peak# | Ret. Time | Area     | Area%   |
|-------|-----------|----------|---------|
| 1     | 17.608    | 15423522 | 50.194  |
| 2     | 28.611    | 15304308 | 49.806  |
| Total |           | 30727830 | 100.000 |

Data File : JOK-0586-IC-0.5%-0.8ML.lcd  
 Sample Name : JOK-0586-IC-0.5%-0.8ML  
 Sample ID : JOK-0586-IC-0.5%-0.8ML  
 Method File : JOK-0.5%-60min-0.8ml.lcm  
 Chromatogram

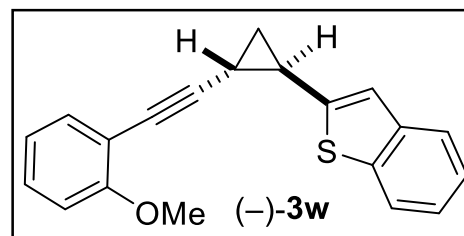

mAU

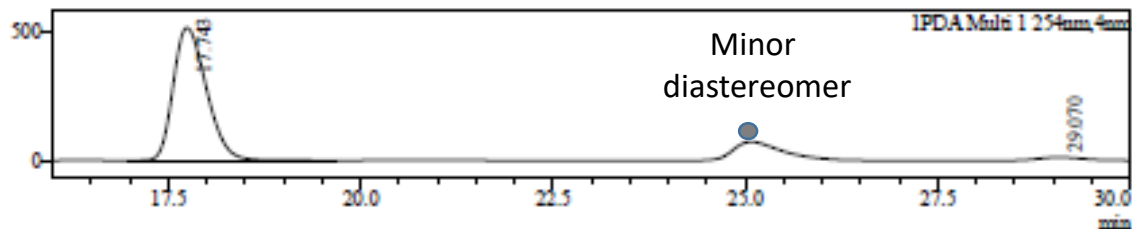

UV Spectrum  
 Retention time = 17.743

mAU

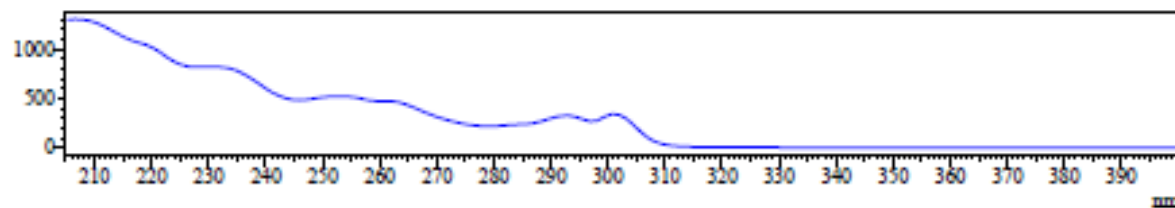

UV Spectrum  
 Retention time = 29.070

mAU

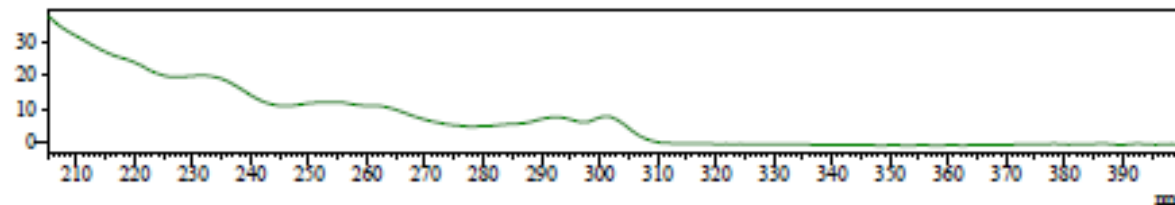

Peak Table

PDA Ch1 254nm

| Peak# | Ret. Time | Area     | Area%   |
|-------|-----------|----------|---------|
| 1     | 17.743    | 15440731 | 96.643  |
| 2     | 29.070    | 536357   | 3.357   |
| Total |           | 15977089 | 100.000 |

# $^1\text{H}$ NMR of **3x**, 600 MHz, $\text{CDCl}_3$

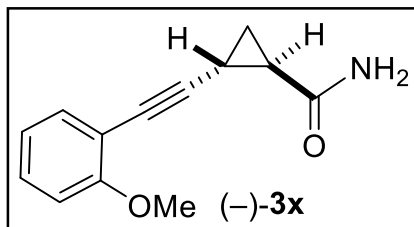

7.352  
7.350  
7.340  
7.337  
7.268  
7.266  
7.254  
7.242  
7.239  
6.886  
6.885  
6.874  
6.872  
6.861  
6.860  
6.856  
6.842  
5.748  
5.622

3.868

2.116  
2.115  
2.110  
1.876  
1.872  
1.870  
1.865  
1.863  
1.523  
1.521  
1.514  
1.508  
1.506  
1.287  
1.280  
1.276  
1.273  
1.270  
1.266  
1.263  
1.256

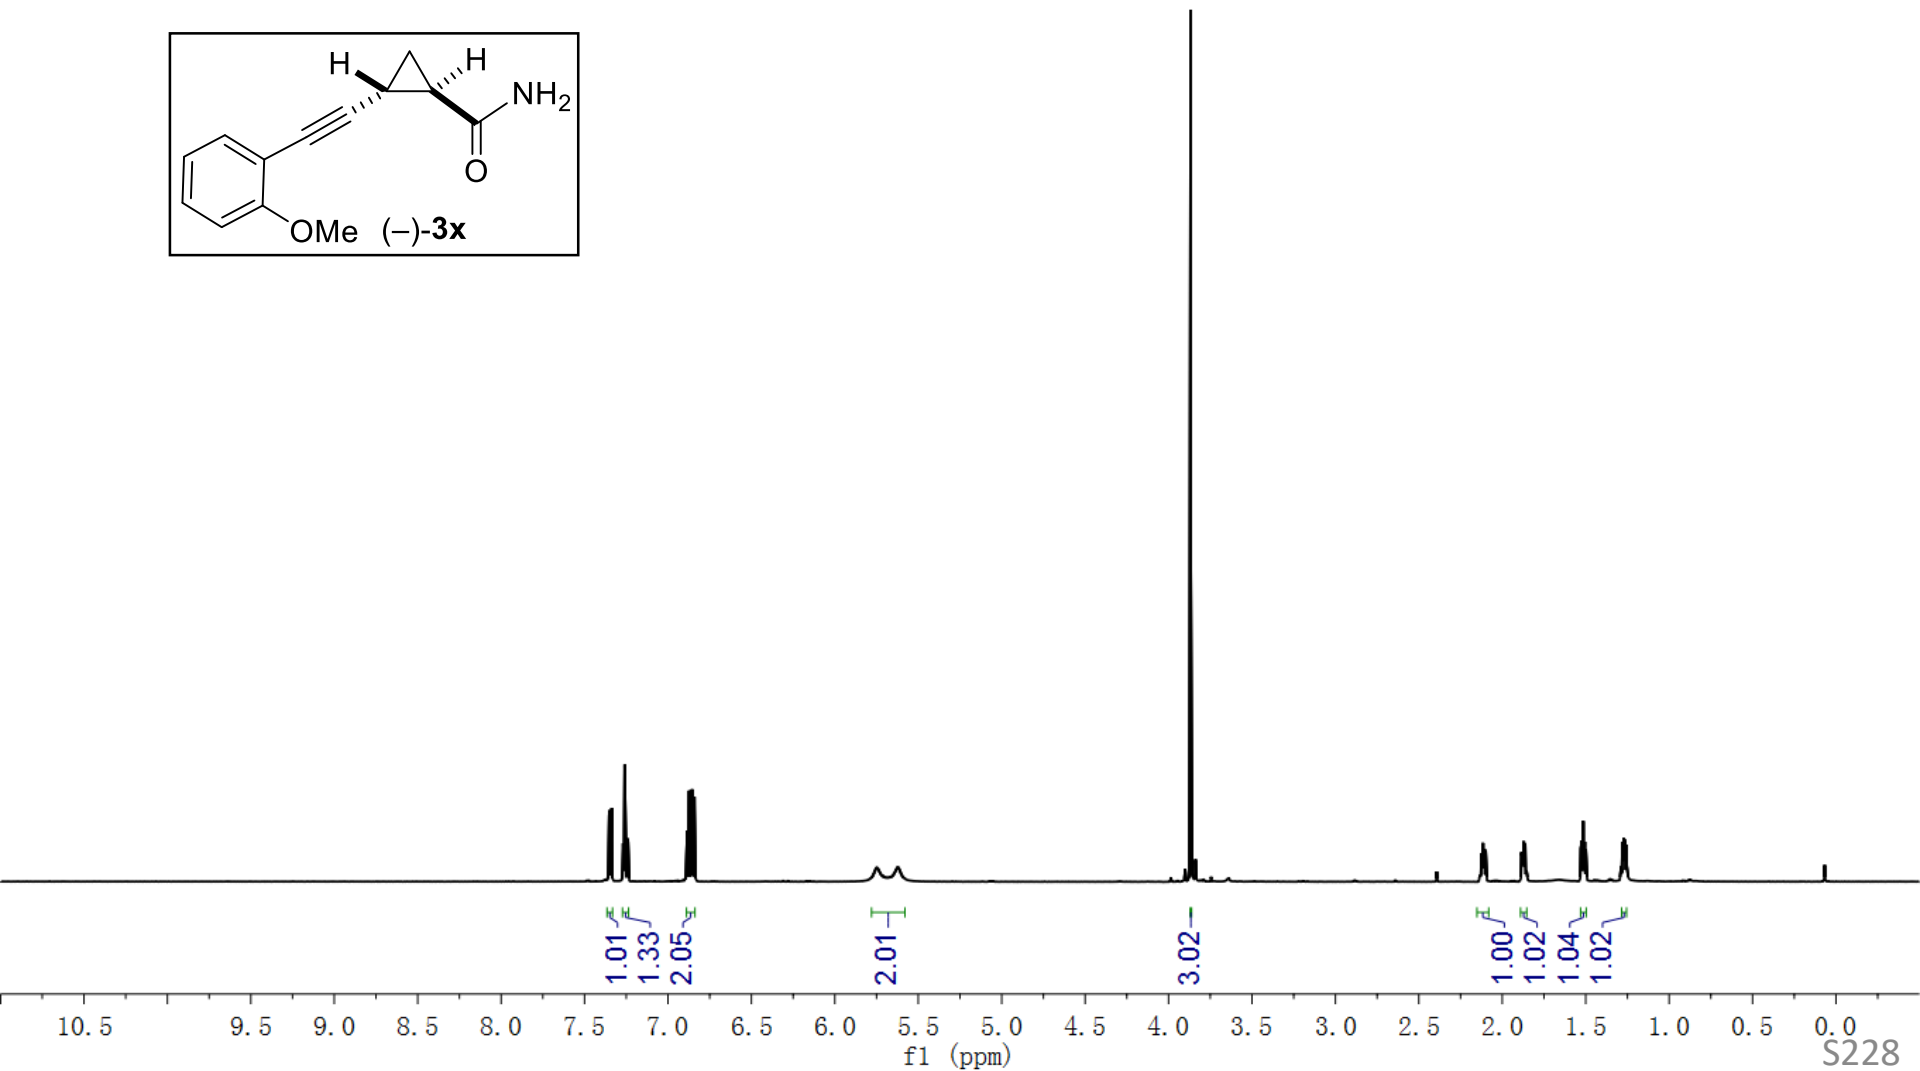

$^{13}\text{C}$  NMR of **3x**, 151 MHz,  $\text{CDCl}_3$

—173.196

—160.192

—133.891

—129.519

—120.575

~112.345

~110.683

—94.296

{ 77.372

{ 77.169

{ 76.949

{ 73.744

—55.898

—24.570

—16.905

—10.953

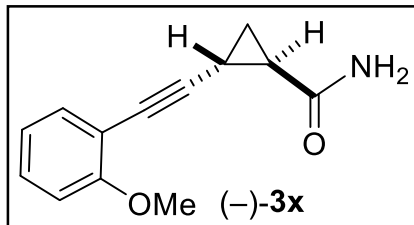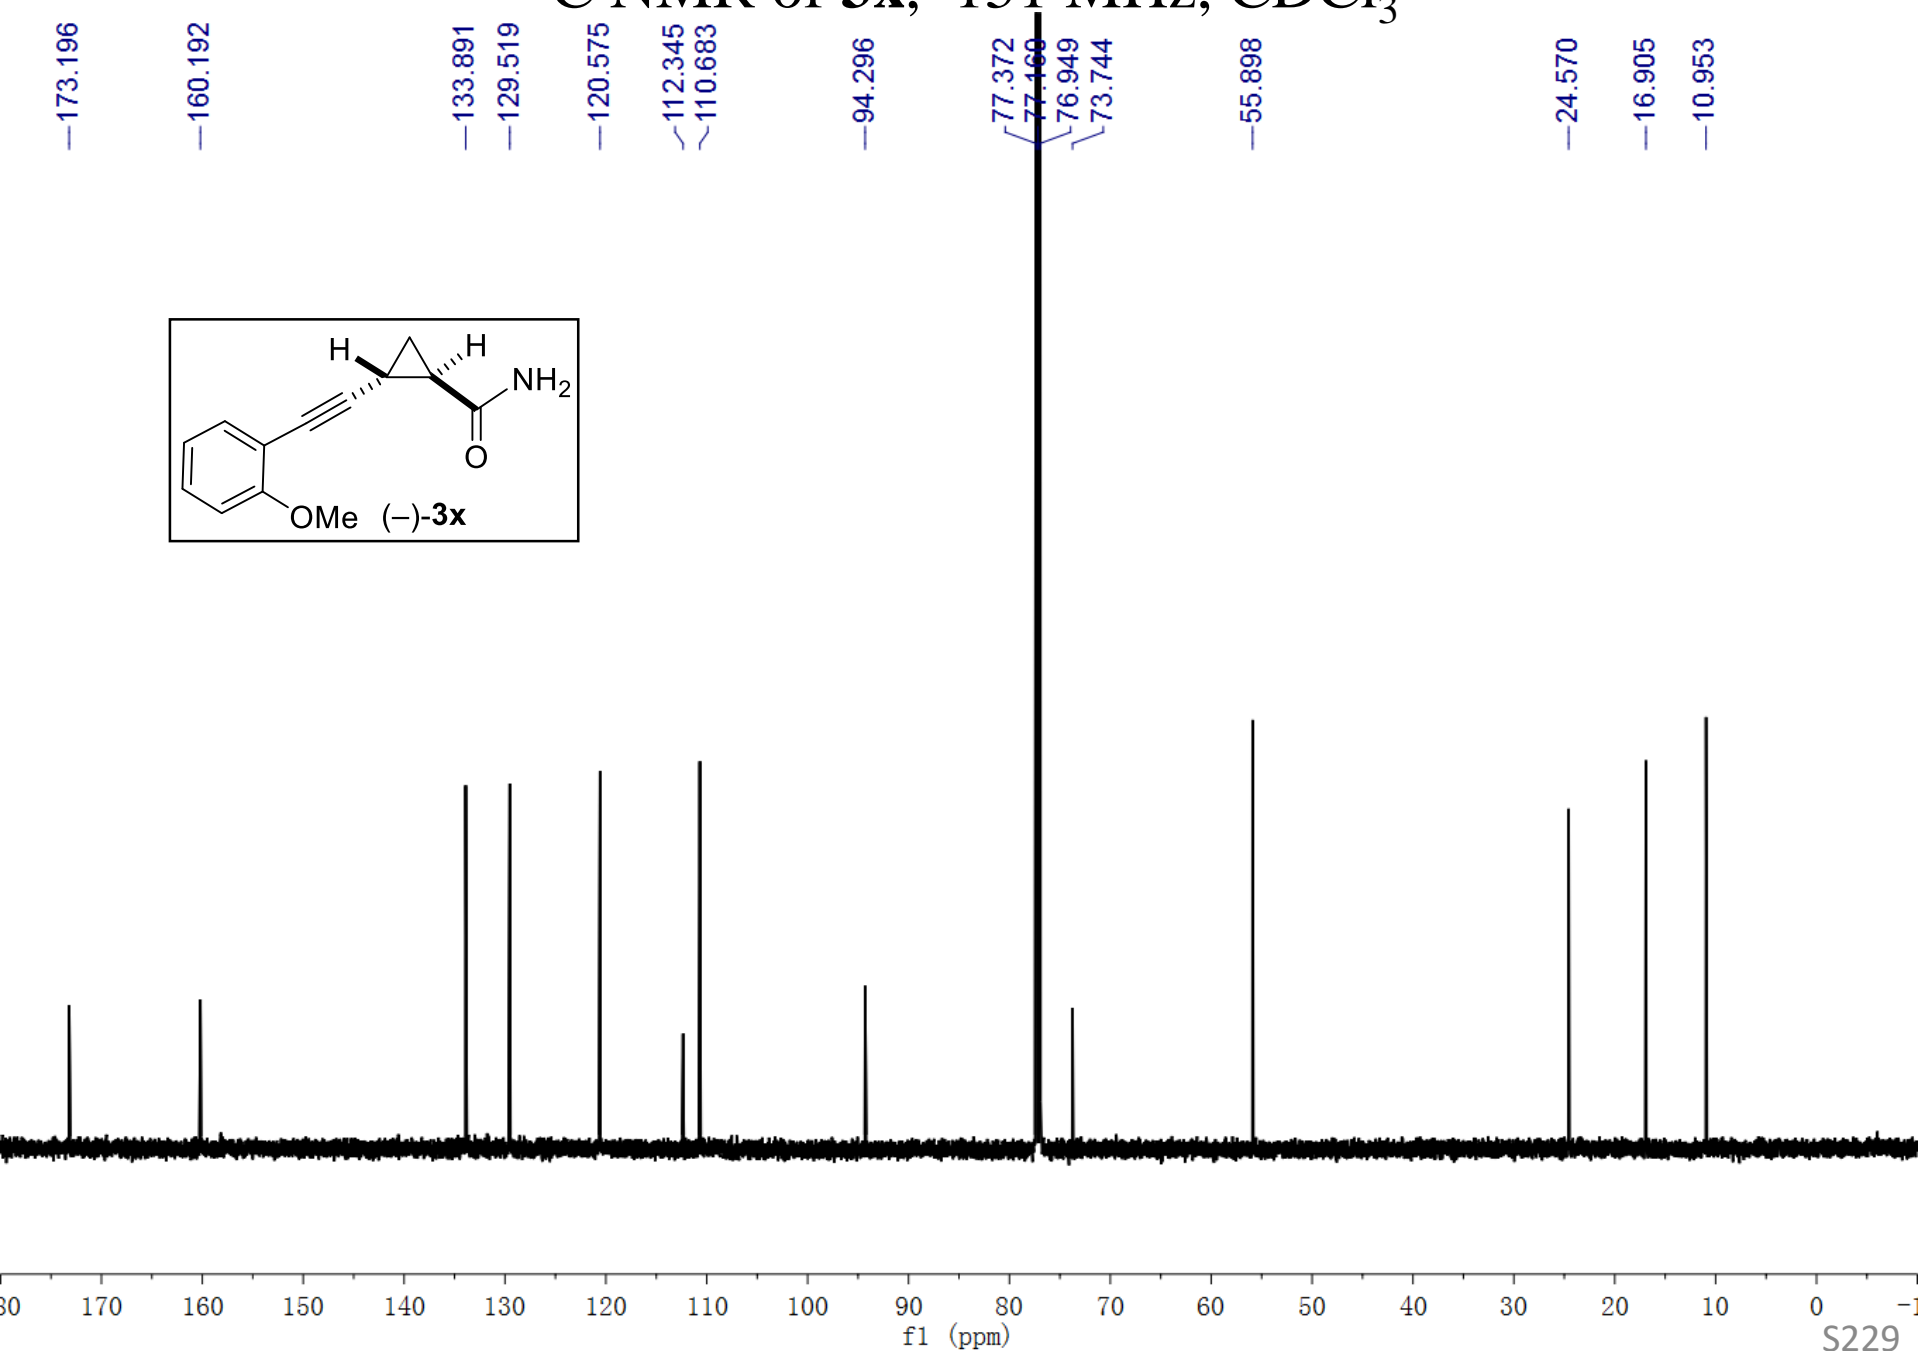

Data File : J0K-0342-IC-1%-0.8ML-isopropanol-solvent005.lcd  
 Sample Name : J0K-0342-IC-1%-0.8ML-isopropanol-solvent005  
 Sample ID : J0K-0342-IC-1%-0.8ML-isopropano  
 Method File : J0K-1%-0.8ml-50min.lcm

Chromatogram

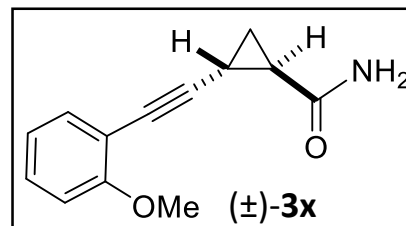

mAU

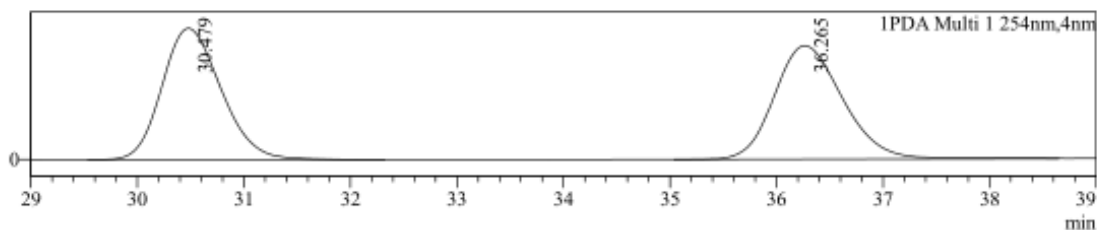

UV Spectrum

Retention time = 30.479

mAU

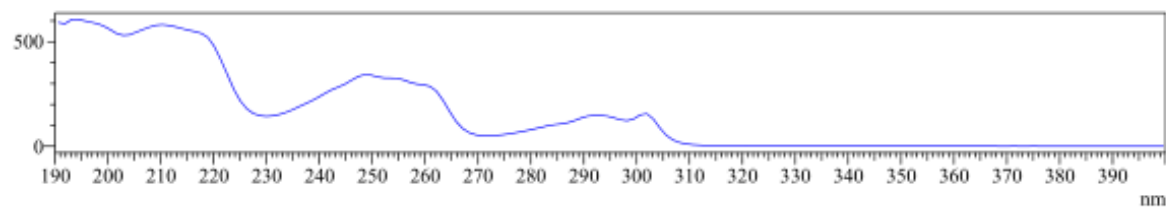

UV Spectrum

Retention time = 36.265

mAU

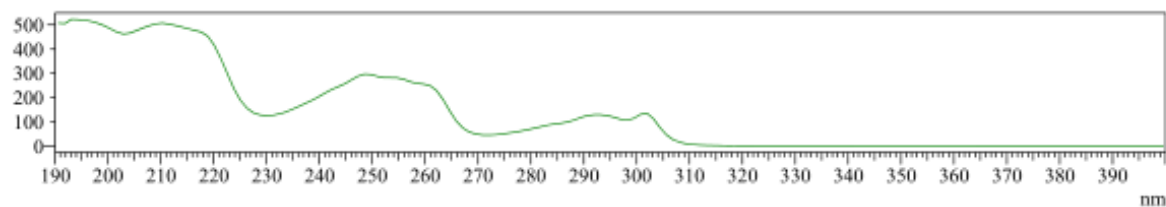

Peak Table

PDA Ch1 254nm

| Peak# | Ret. Time | Area     | Area%   |
|-------|-----------|----------|---------|
| 1     | 30.479    | 12463706 | 50.047  |
| 2     | 36.265    | 12440286 | 49.953  |
| Total |           | 24903992 | 100.000 |

Data File : JOK-0310-IC-1%-0.8ML-isopropanol-solvent008.lcd  
 Sample Name : JOK-0310-IC-1%-0.8ML-isopropanol-solvent008  
 Sample ID : JOK-0310-IC-1%-0.8ML-isopropano  
 Method File : JOK-1%-0.8m-50MINI.lcm  
 Chromatogram

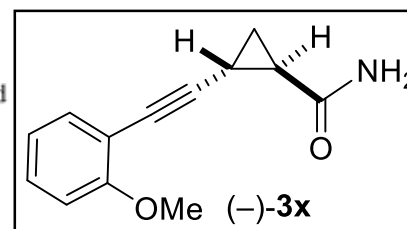

mAU

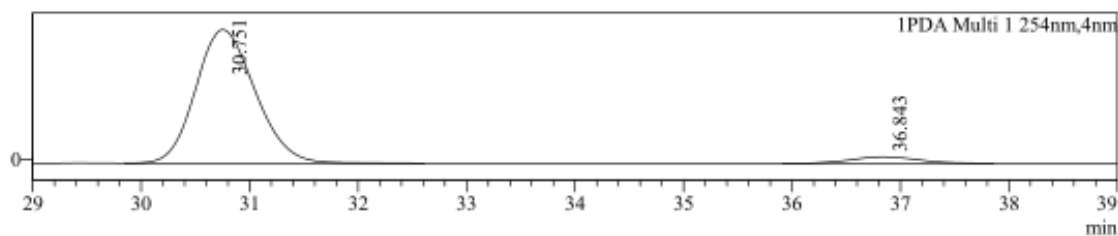

UV Spectrum

Retention time = 30.751

mAU

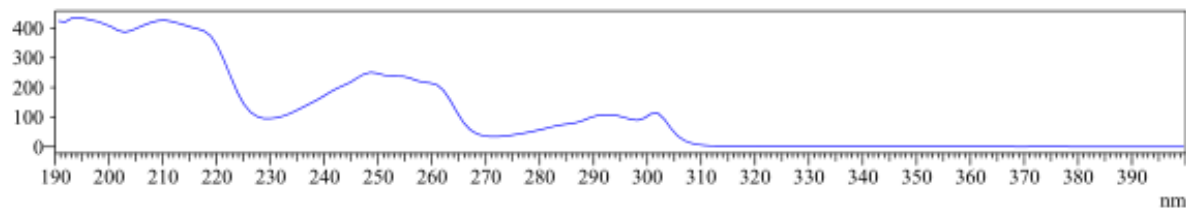

UV Spectrum

Retention time = 36.843

mAU

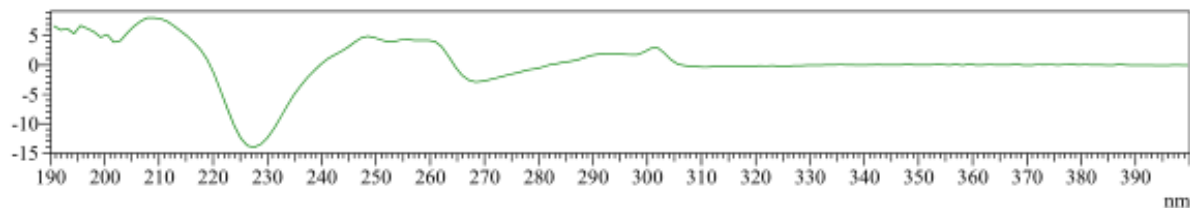

Peak Table

PDA Ch1 254nm

| Peak# | Ret. Time | Area    | Area%   |
|-------|-----------|---------|---------|
| 1     | 30.751    | 9217551 | 94.697  |
| 2     | 36.843    | 516187  | 5.303   |
| Total |           | 9733738 | 100.000 |

# $^1\text{H}$ NMR of **3y**, 600 MHz, $\text{CDCl}_3$

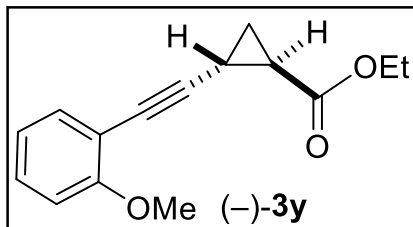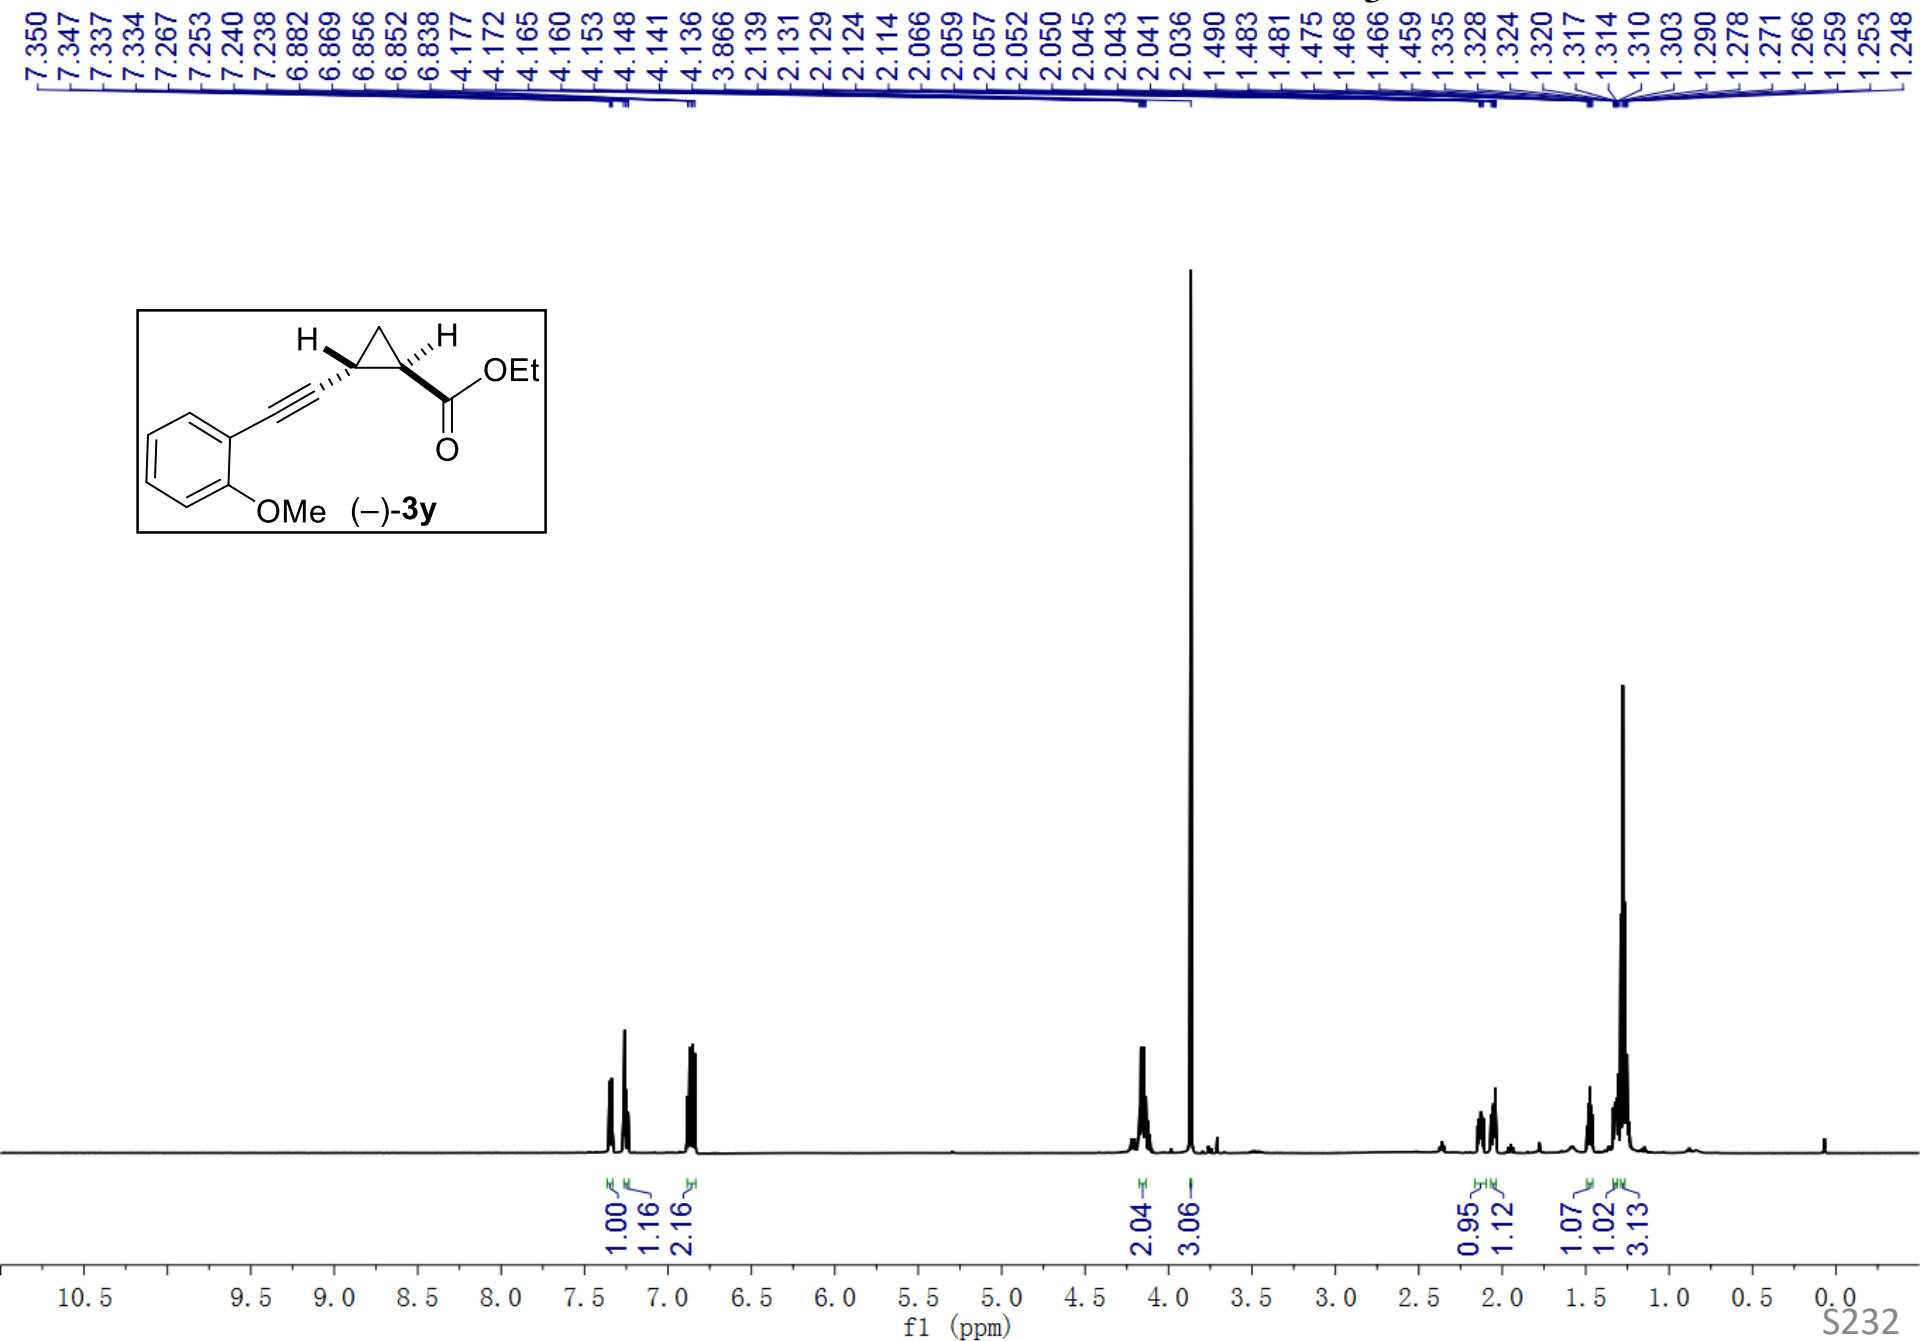



$^{13}\text{C}$  NMR of **3y**, 151 MHz,  $\text{CDCl}_3$

—172.514

—160.256

—133.900

—129.537

—120.542

—112.324

—110.670

—93.745

77.372

77.160

76.949

73.973

—61.049

—55.901

23.461

17.440

14.387

11.527

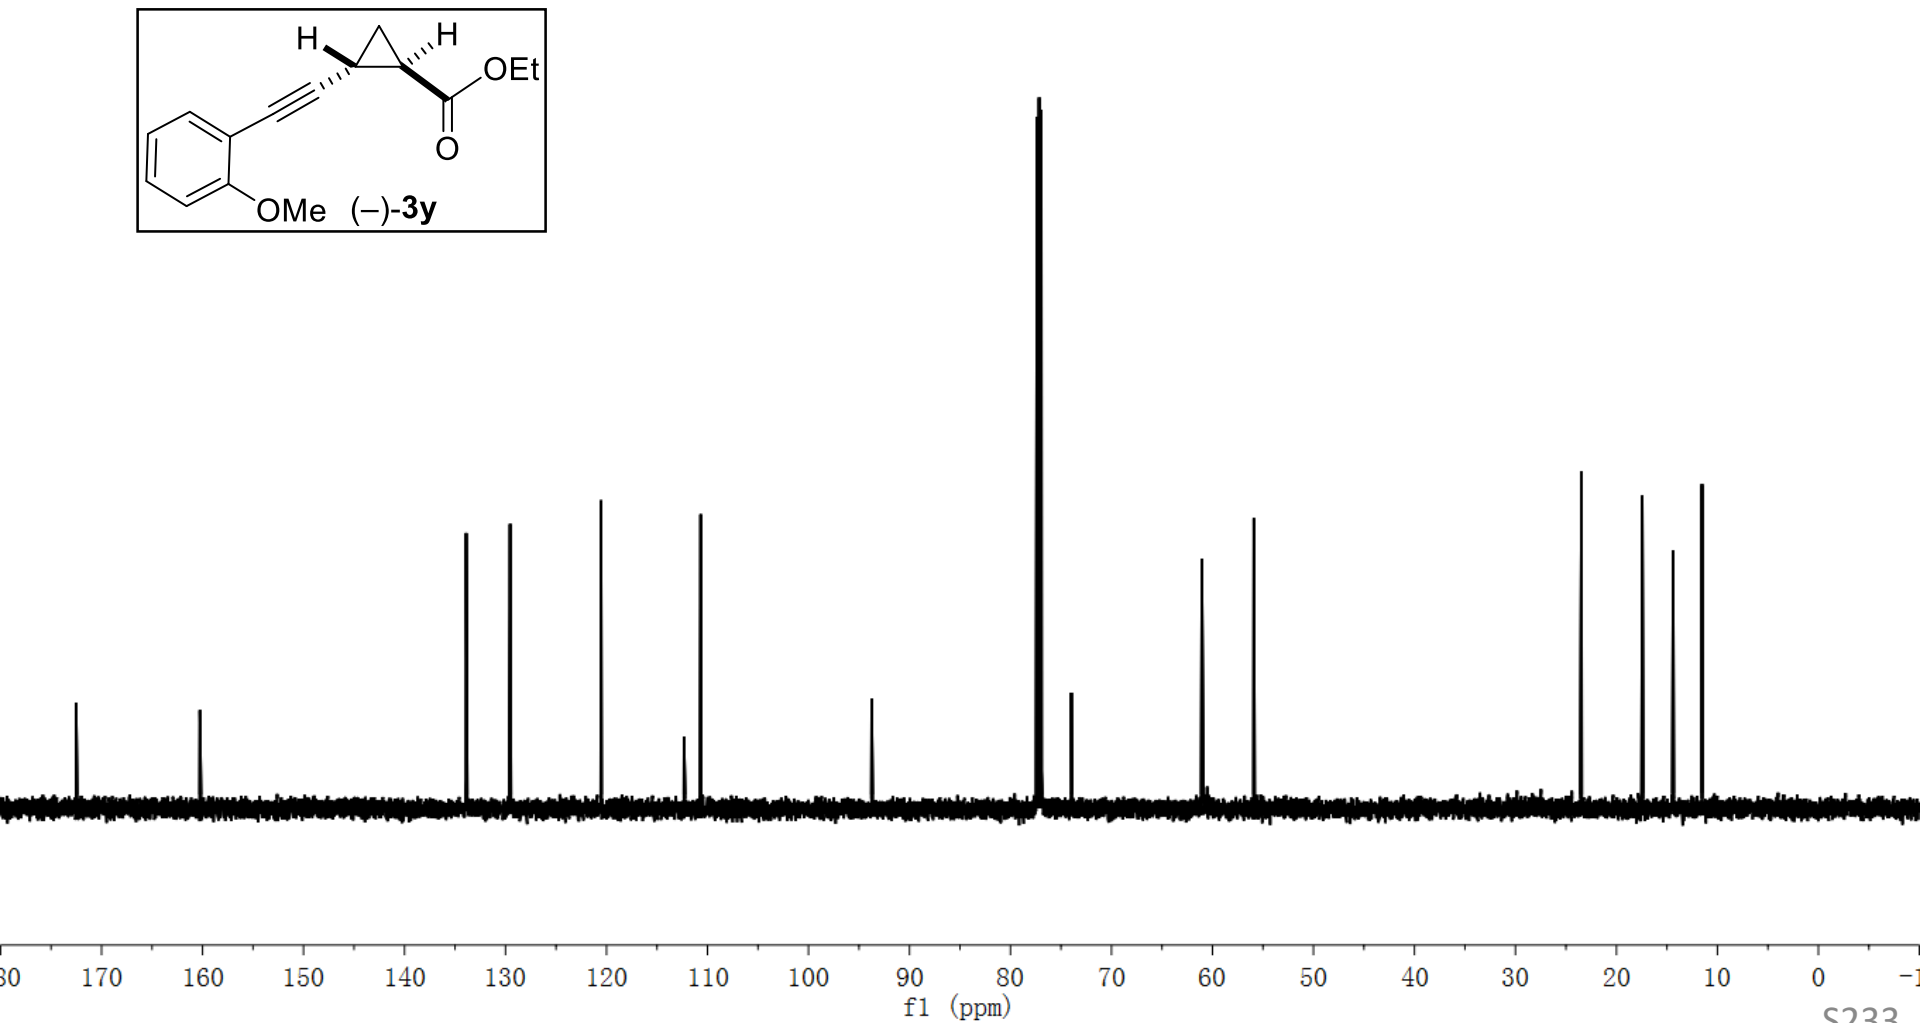

Data File : J0K-1514-new-IA--0.3%-1ML.lcd  
 Sample Name : J0K-1514-new-IA--0.3%-1ML  
 Sample ID : J0K-1514-new-IA--0.3%-1ML  
 Method File : J0K-0.3%-45min-1ml.lcm

Chromatogram

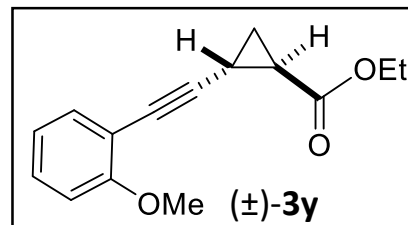

mAU

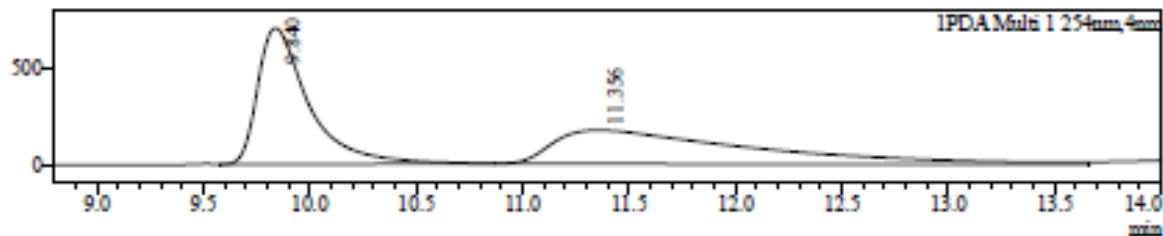

UV Spectrum  
 Retention time = 9.840

mAU

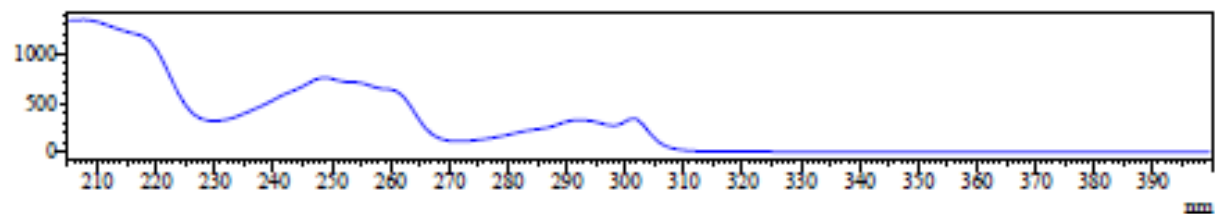

UV Spectrum  
 Retention time = 11.356

mAU

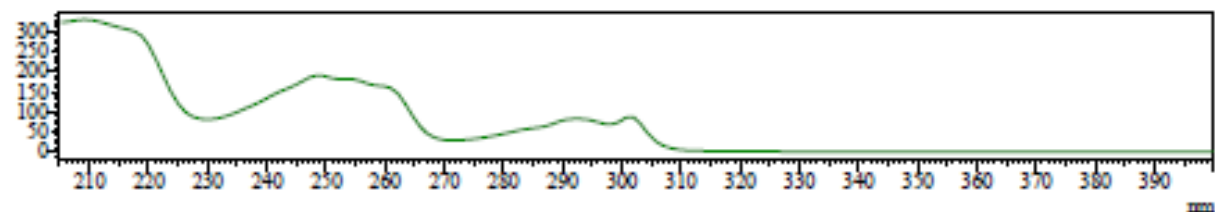

Peak Table

PDA Ch1 254nm

| Peak# | Ret. Time | Area     | Area%   |
|-------|-----------|----------|---------|
| 1     | 9.840     | 11607489 | 50.875  |
| 2     | 11.356    | 11208328 | 49.125  |
| Total |           | 22815817 | 100.000 |

Data File : JOK-1513-IA--0.3%-1ML.lcd  
 Sample Name : JOK-1513-IA--0.3%-1ML  
 Sample ID : JOK-1513-IA--0.3%-1ML  
 Method File : JOK-0.3%--2.5min-1ml.lcm

Chromatogram

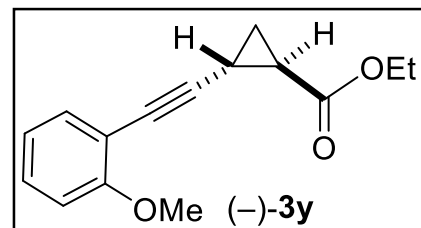

mAU

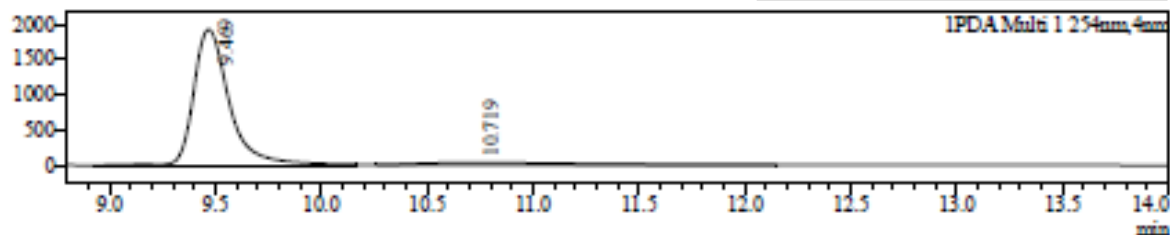

UV Spectrum  
 Retention time = 9.469

mAU

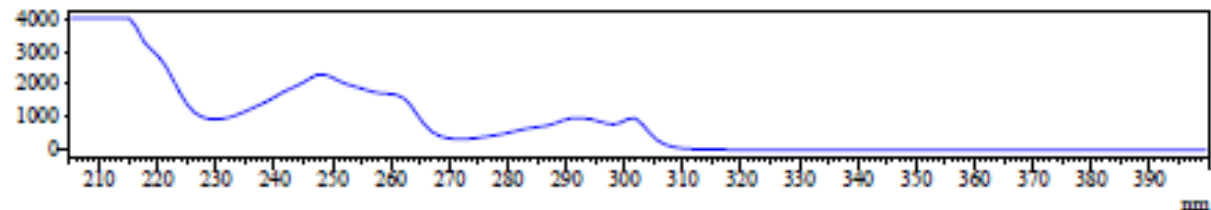

UV Spectrum  
 Retention time = 10.719

mAU

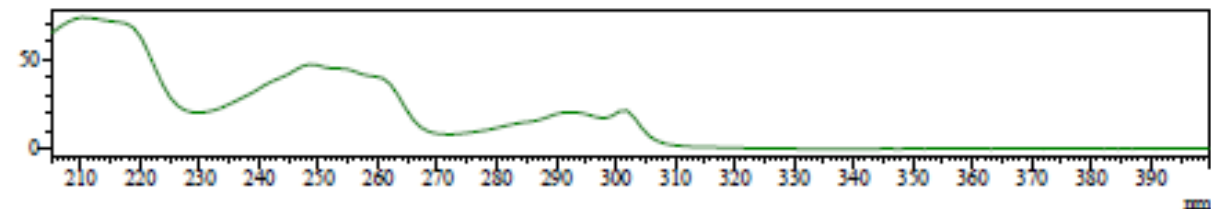

Peak Table

PDA Ch1 254nm

| Peak# | Ret. Time | Area     | Area%   |
|-------|-----------|----------|---------|
| 1     | 9.469     | 22666700 | 93.877  |
| 2     | 10.719    | 1478374  | 6.123   |
| Total |           | 24145074 | 100.000 |

# $^1\text{H}$ NMR of **3z**, 500 MHz, $\text{CDCl}_3$

7.425  
7.410  
7.275  
7.260  
7.239  
7.223  
7.136  
7.121  
6.918  
6.903  
6.885  
6.868

2.340  
1.899  
1.888  
1.881  
1.870  
1.655  
1.493  
1.484  
1.475  
1.467  
1.077  
1.067  
1.057

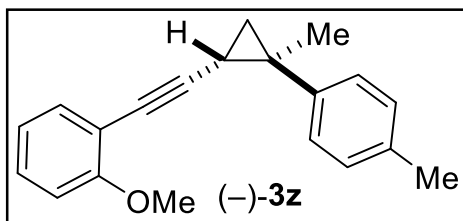

● Minor diastereomer

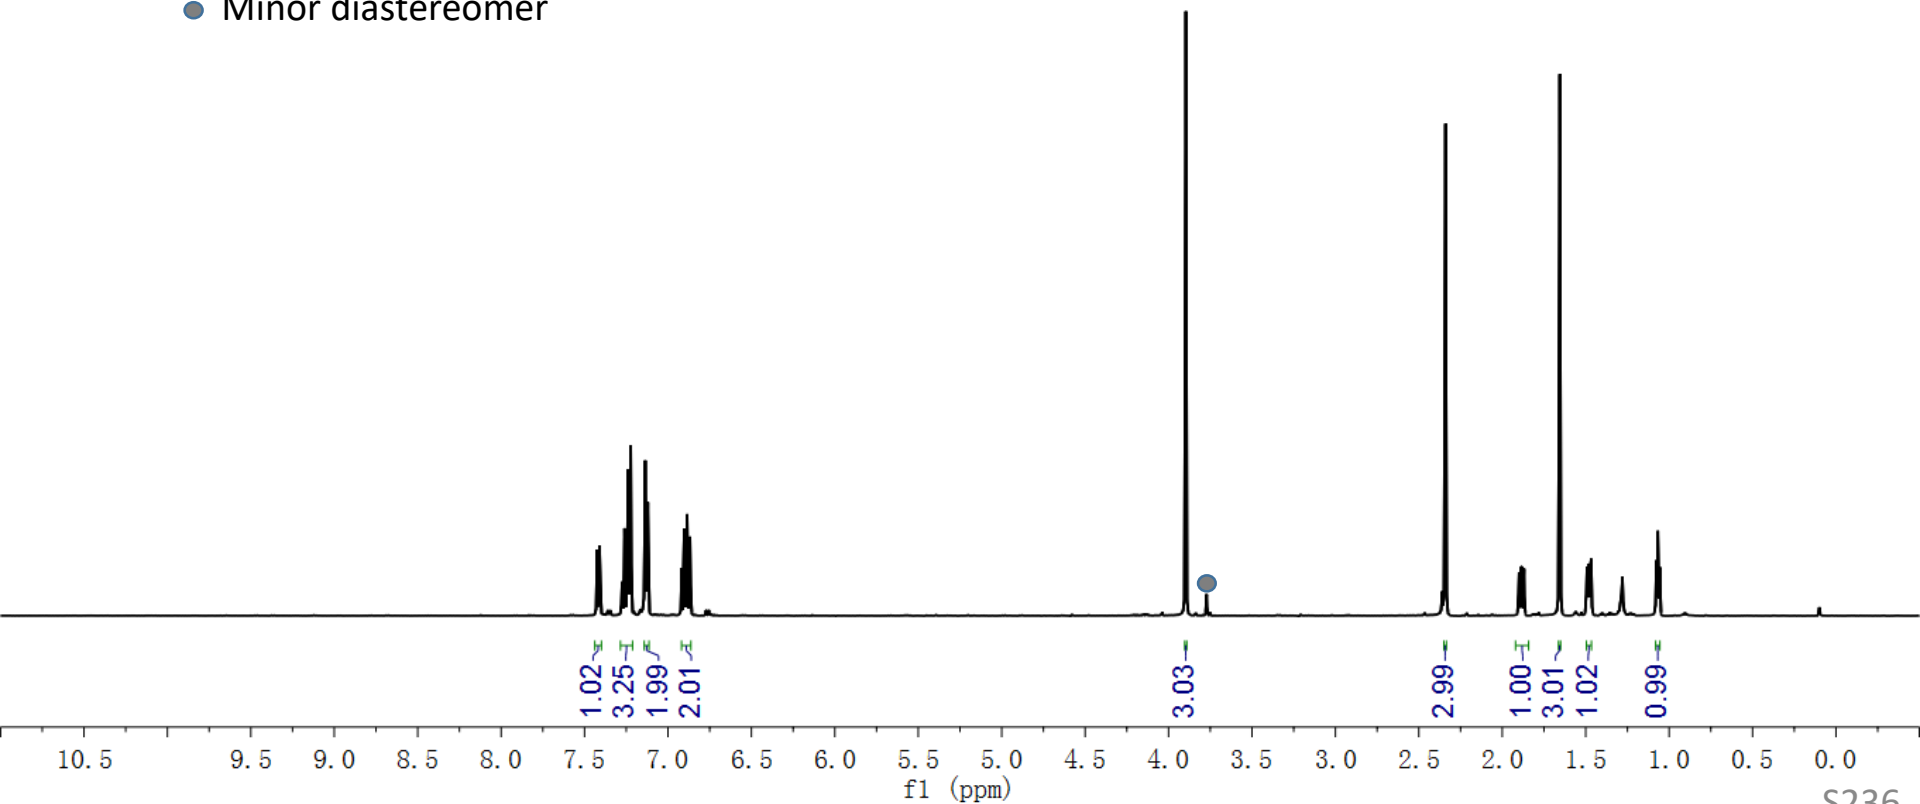

$^{13}\text{C}$  NMR of **3z**, 126 MHz,  $\text{CDCl}_3$

— 160.189

— 142.995

— 135.908

— 133.656

— 129.172

— 128.923

— 127.347

— 120.510

— 113.365

— 110.717

— 94.981

— 77.414

— 77.160

— 76.906

— 75.403

— 55.914

— 27.917

— 23.638

— 22.785

— 21.107

— 16.452

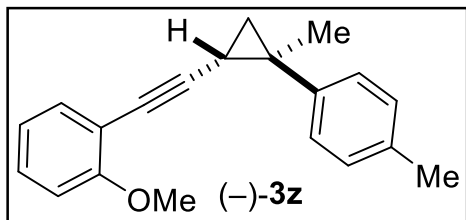

● Minor diastereomer

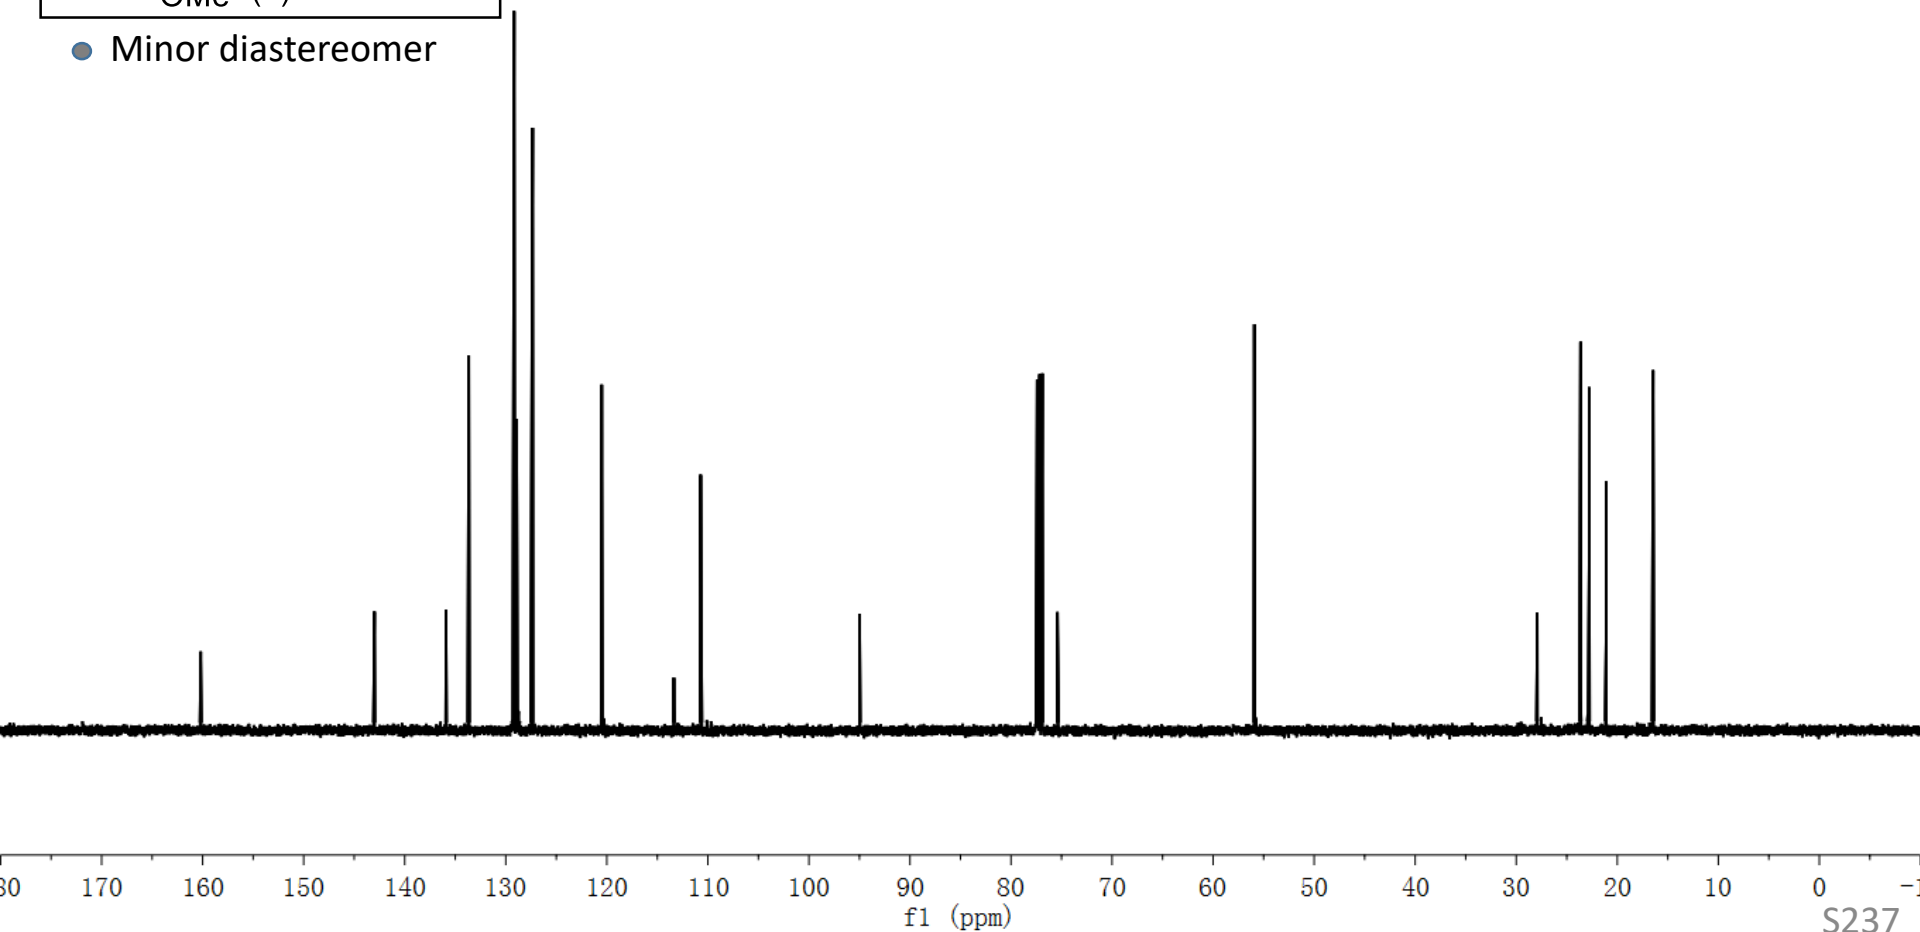

Data File : J0K-0106-IC-0.5%-0.8ML-isopropanol-solvent003.lcd  
 Sample Name : J0K-0106-IC-0.5%-0.8ML-isopropanol-solvent003  
 Sample ID : J0K-0106-IC-0.5%-0.8ML-isopropanol  
 Method File : JK-0%-0.8ml.lcm

Chromatogram

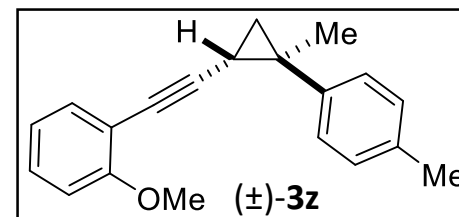

mAU

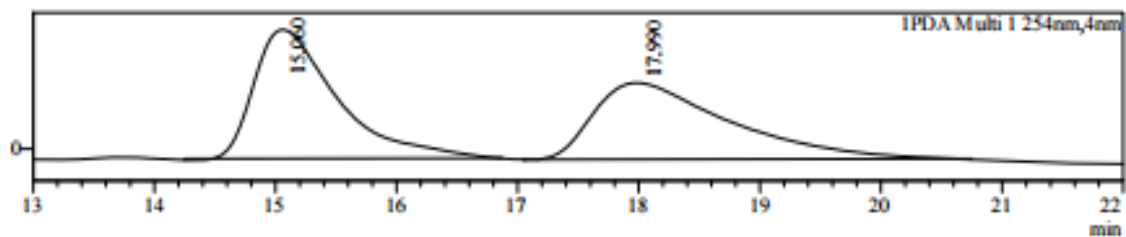

UV Spectrum

Retention time = 15.060

mAU

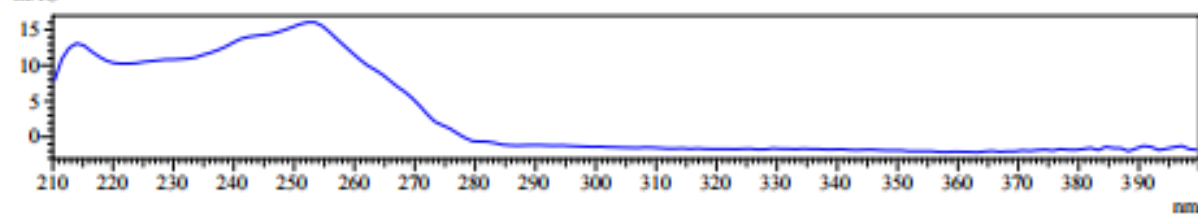

U

Retention time = 17.990

mAU

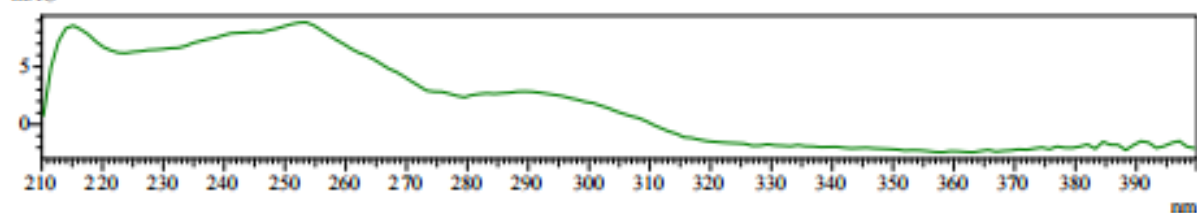

Peak Table

PDA Ch1 254nm

| Peak# | Ret. Time | Area    | Area%   |
|-------|-----------|---------|---------|
| 1     | 15.060    | 780497  | 50.719  |
| 2     | 17.990    | 758360  | 49.281  |
| Total |           | 1538857 | 100.000 |

Data File : J0K-0108-IC-0.5%-0.8ML-isopropanol-solvent004.lcd  
 Sample Name : J0K-0108-IC-0.5%-0.8ML-isopropanol-solvent004  
 Sample ID : J0K-0108-IC-0.5%-0.8ML-isopropanol  
 Method File : JK-0%-0.8ml.lcm

Chromatogram

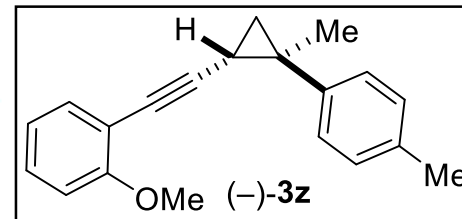

mAU

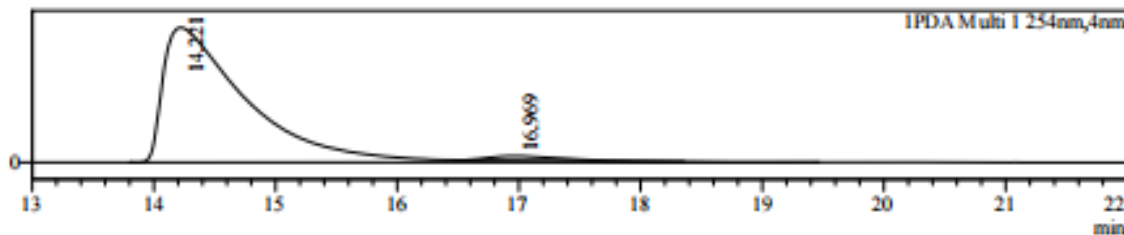

UV Spectrum  
 Retention time = 14.221

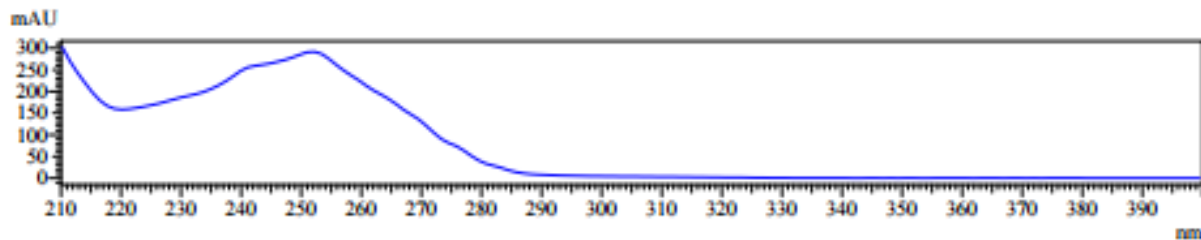

U  
 Retention time = 16.969

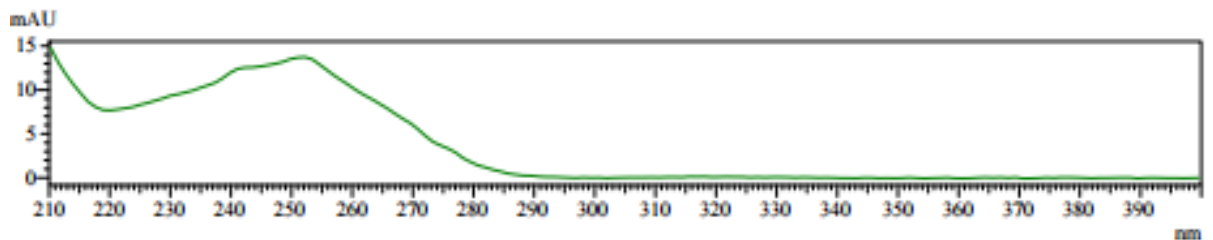

Peak Table

PDA Ch1 254nm

| Peak# | Ret. Time | Area     | Area%   |
|-------|-----------|----------|---------|
| 1     | 14.221    | 13283795 | 97.162  |
| 2     | 16.969    | 388070   | 2.838   |
| Total |           | 13671865 | 100.000 |

# $^1\text{H}$ NMR of **3aa**, 600 MHz, $\text{CDCl}_3$

7.531, 7.529, 7.526, 7.517, 7.505, 7.502, 7.492, 7.490, 7.353, 7.350, 7.341, 7.328, 7.294, 7.292, 7.281, 7.270, 7.268, 7.260, 6.926, 6.925, 6.913, 6.912, 6.901, 6.899, 6.892, 6.878, -3.909, 2.148, 2.136, 2.132, 2.120, 1.921, 1.911, 1.905, 1.895, 1.757, 1.746, 1.735

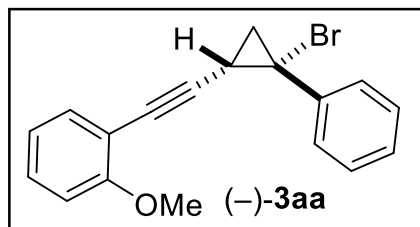

● Minor diastereomer

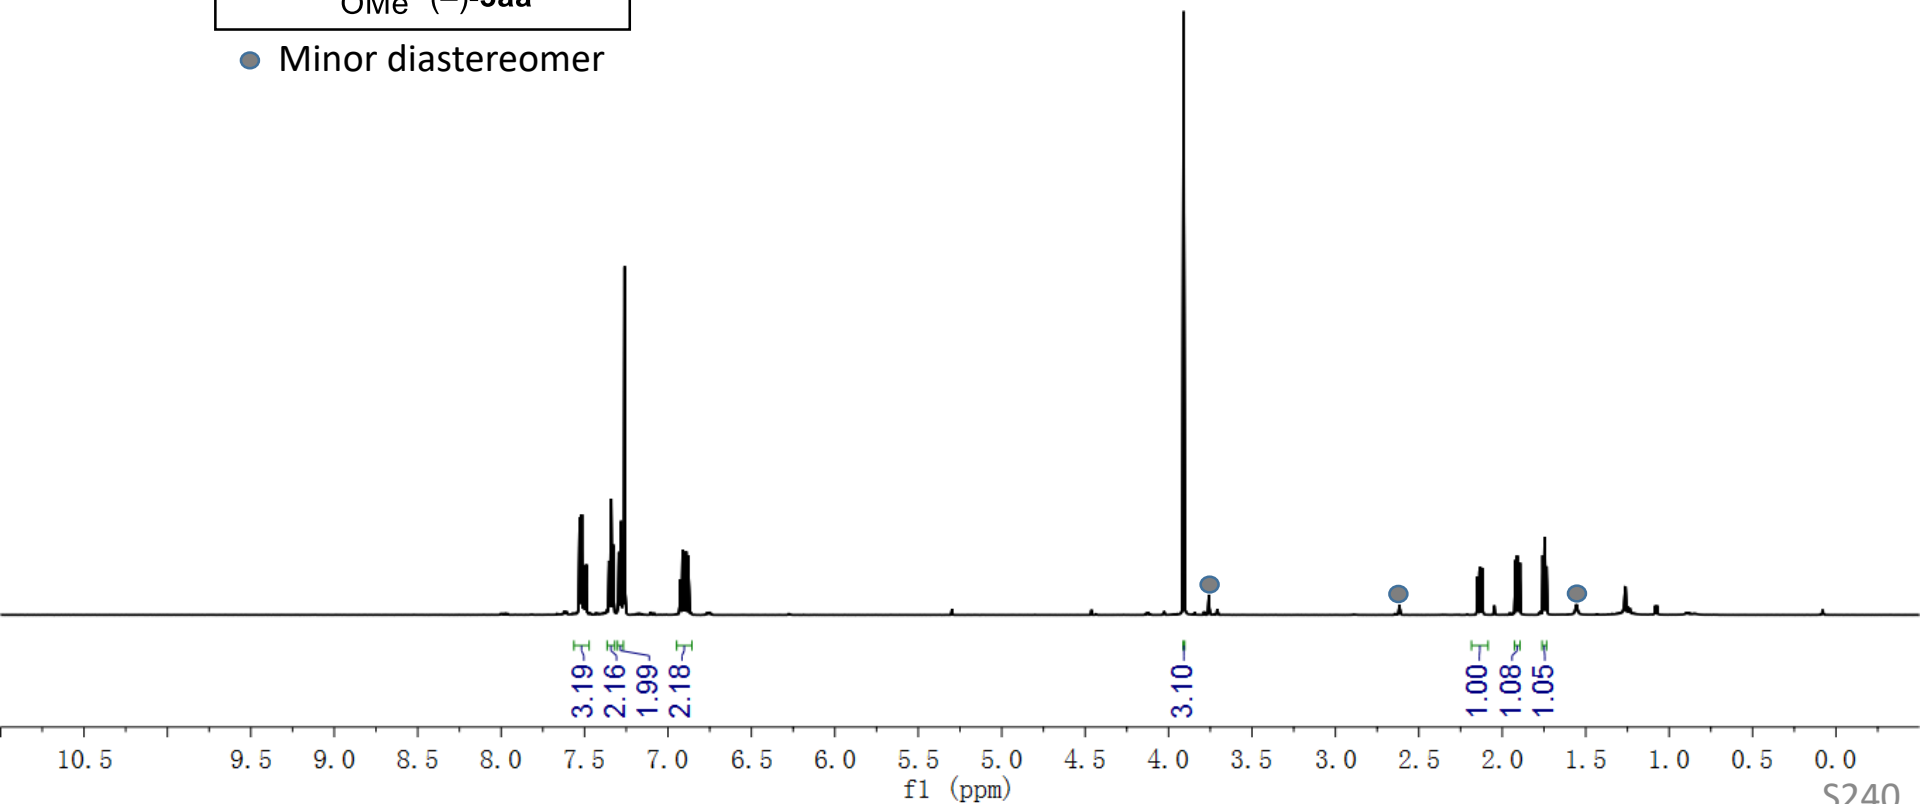



$^{13}\text{C}$  NMR of **3ab**, 151 MHz,  $\text{CDCl}_3$

—160.295  
—142.924  
134.158  
129.512  
128.788  
128.764  
128.487  
—120.602  
—112.669  
—110.821  
—93.102  
77.371  
77.242  
77.160  
76.948  
—56.030  
—39.463  
—25.960  
—17.918

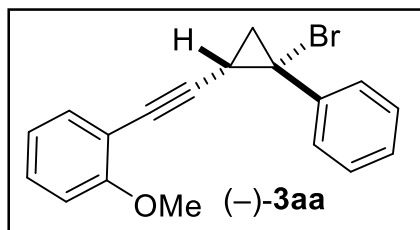

● Minor diastereomer

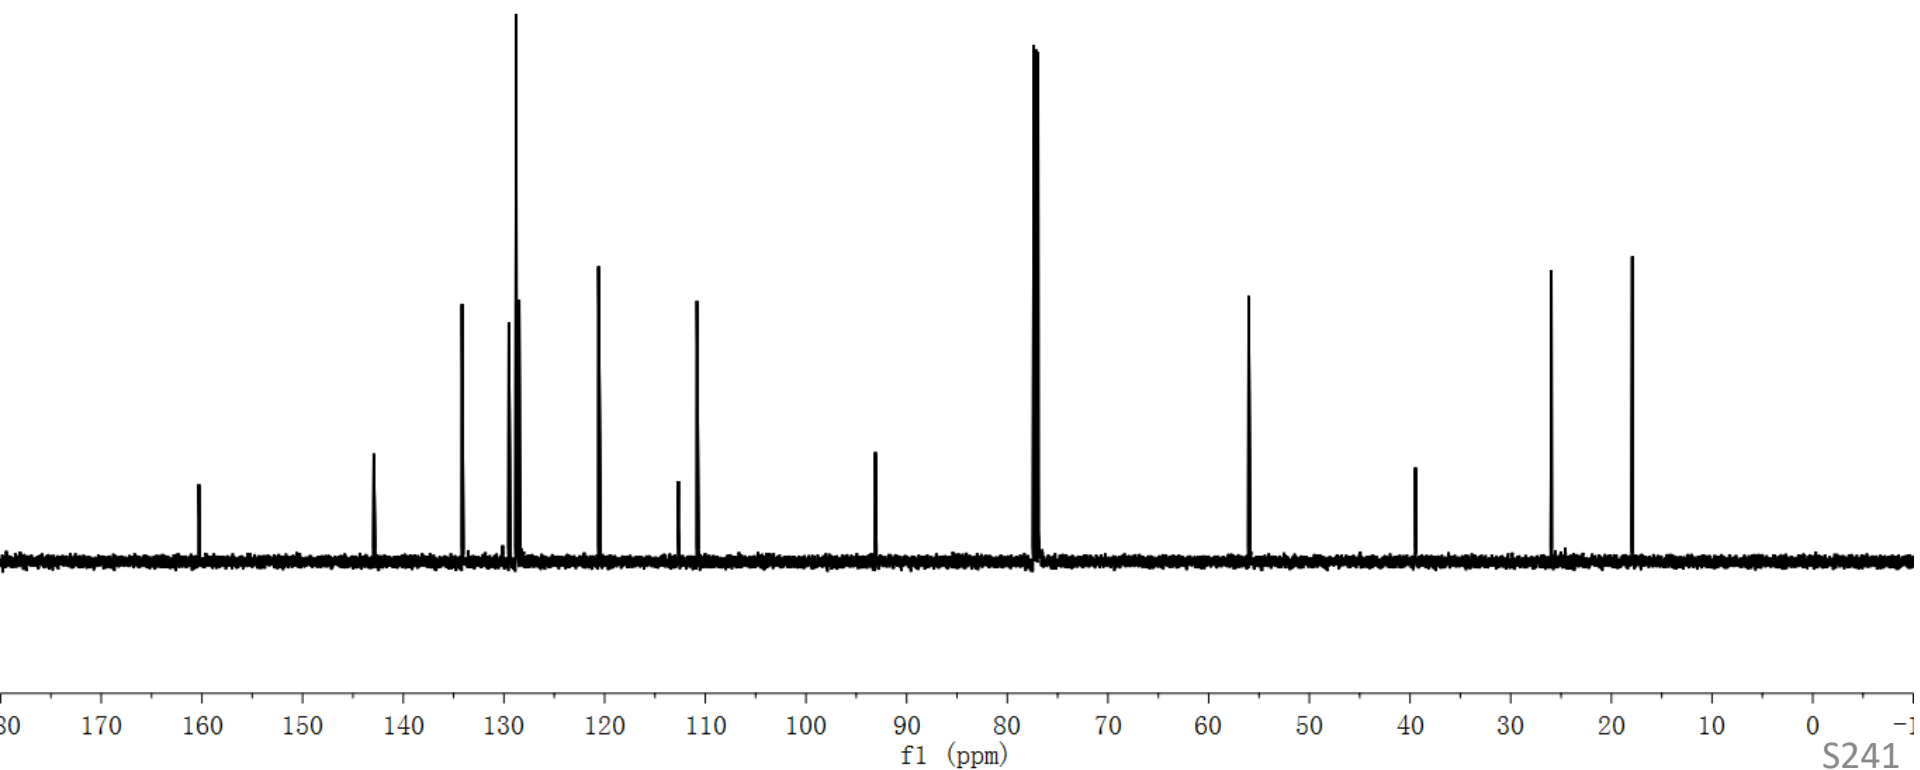

Data File : J0K-0620-IA-0.5%-0.8ML.lcd  
 Sample Name : J0K-0620-IA-0.5%-0.8ML  
 Sample ID : J0K-0620-IA-0.5%-0.8ML  
 Method File : J0K-0.5%-3.5min-0.8ml.lcm

Chromatogram

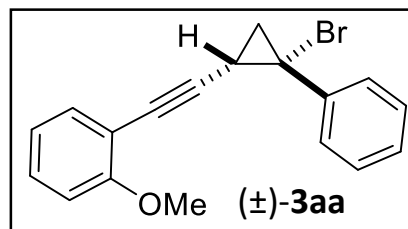

mAU

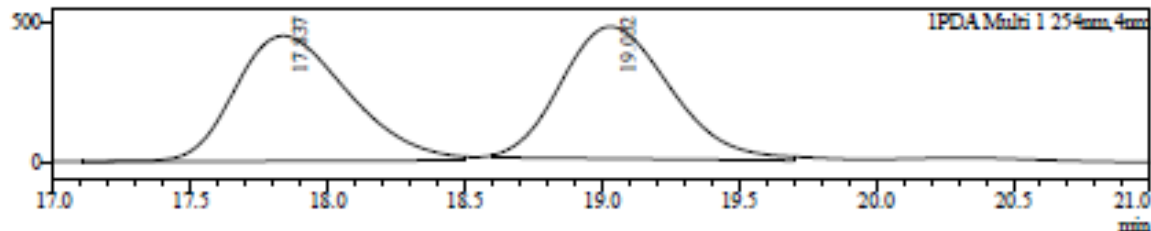

UV Spectrum  
 Retention time = 17.837

mAU

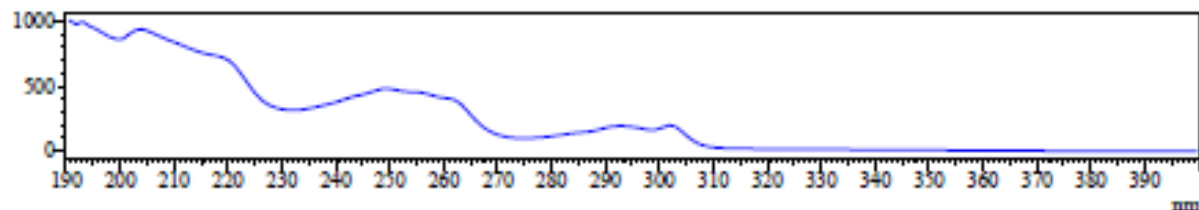

UV Spectrum  
 Retention time = 19.032

mAU

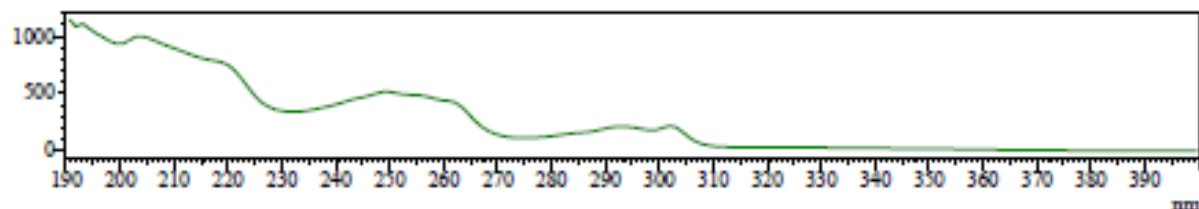

Peak Table

PDA Ch1 254nm

| Peak# | Ret. Time | Area     | Area%   |
|-------|-----------|----------|---------|
| 1     | 17.837    | 12883307 | 49.717  |
| 2     | 19.032    | 13030156 | 50.283  |
| Total |           | 25913463 | 100.000 |

Data File : J0K-0619-IA-0.5%-0.8ML.lcd  
 Sample Name : J0K-0619-IA-0.5%-0.8ML  
 Sample ID : J0K-0619-IA-0.5%-0.8ML  
 Method File : J0K-0.5%--3.5min-0.8ml.lcm

Chromatogram

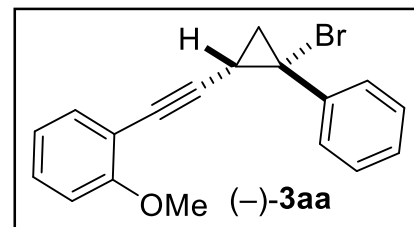

mAU

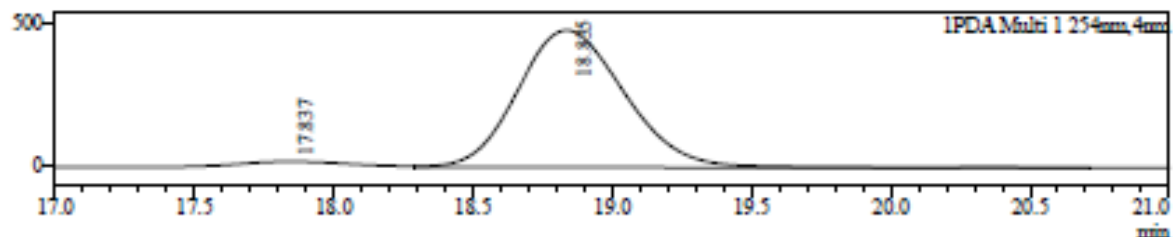

UV Spectrum

Retention time = 17.837

mAU

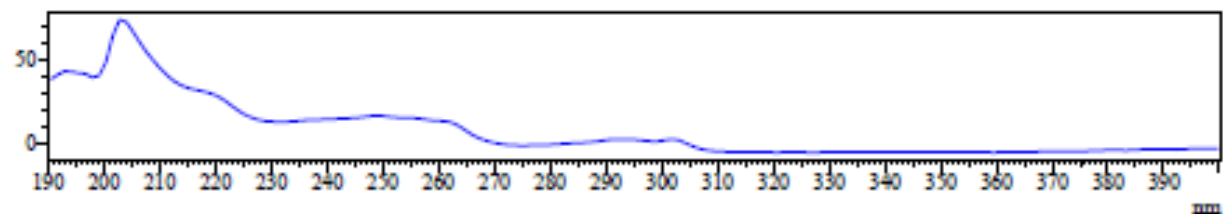

UV Spectrum

Retention time = 18.835

mAU

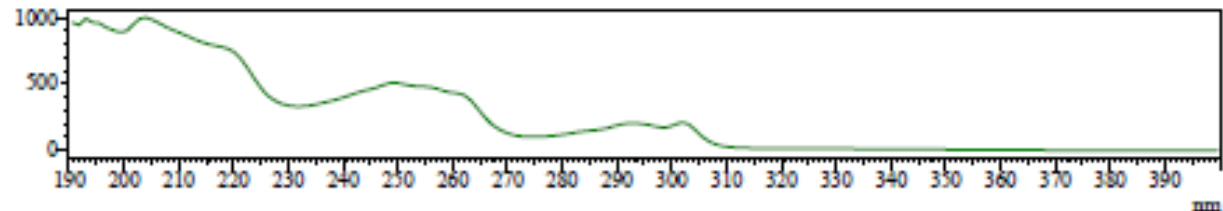

Peak Table

PDA Ch1 254nm

| Peak# | Ret. Time | Area     | Area%   |
|-------|-----------|----------|---------|
| 1     | 17.837    | 580094   | 4.292   |
| 2     | 18.835    | 12935914 | 95.708  |
| Total |           | 13516008 | 100.000 |

# $^1\text{H}$ NMR of **3ab**, 600 MHz, $\text{CDCl}_3$

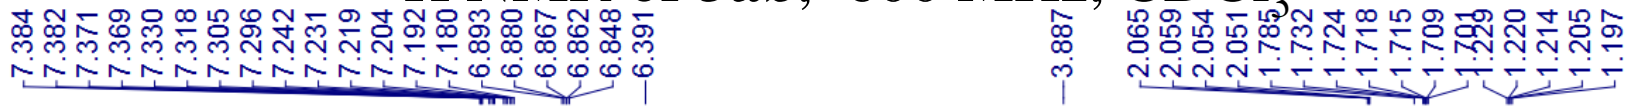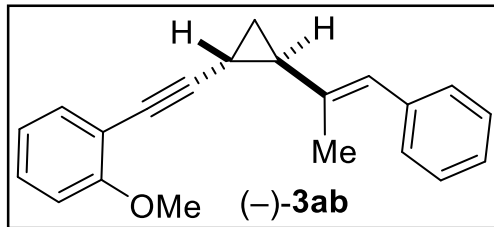

● Minor diastereomer

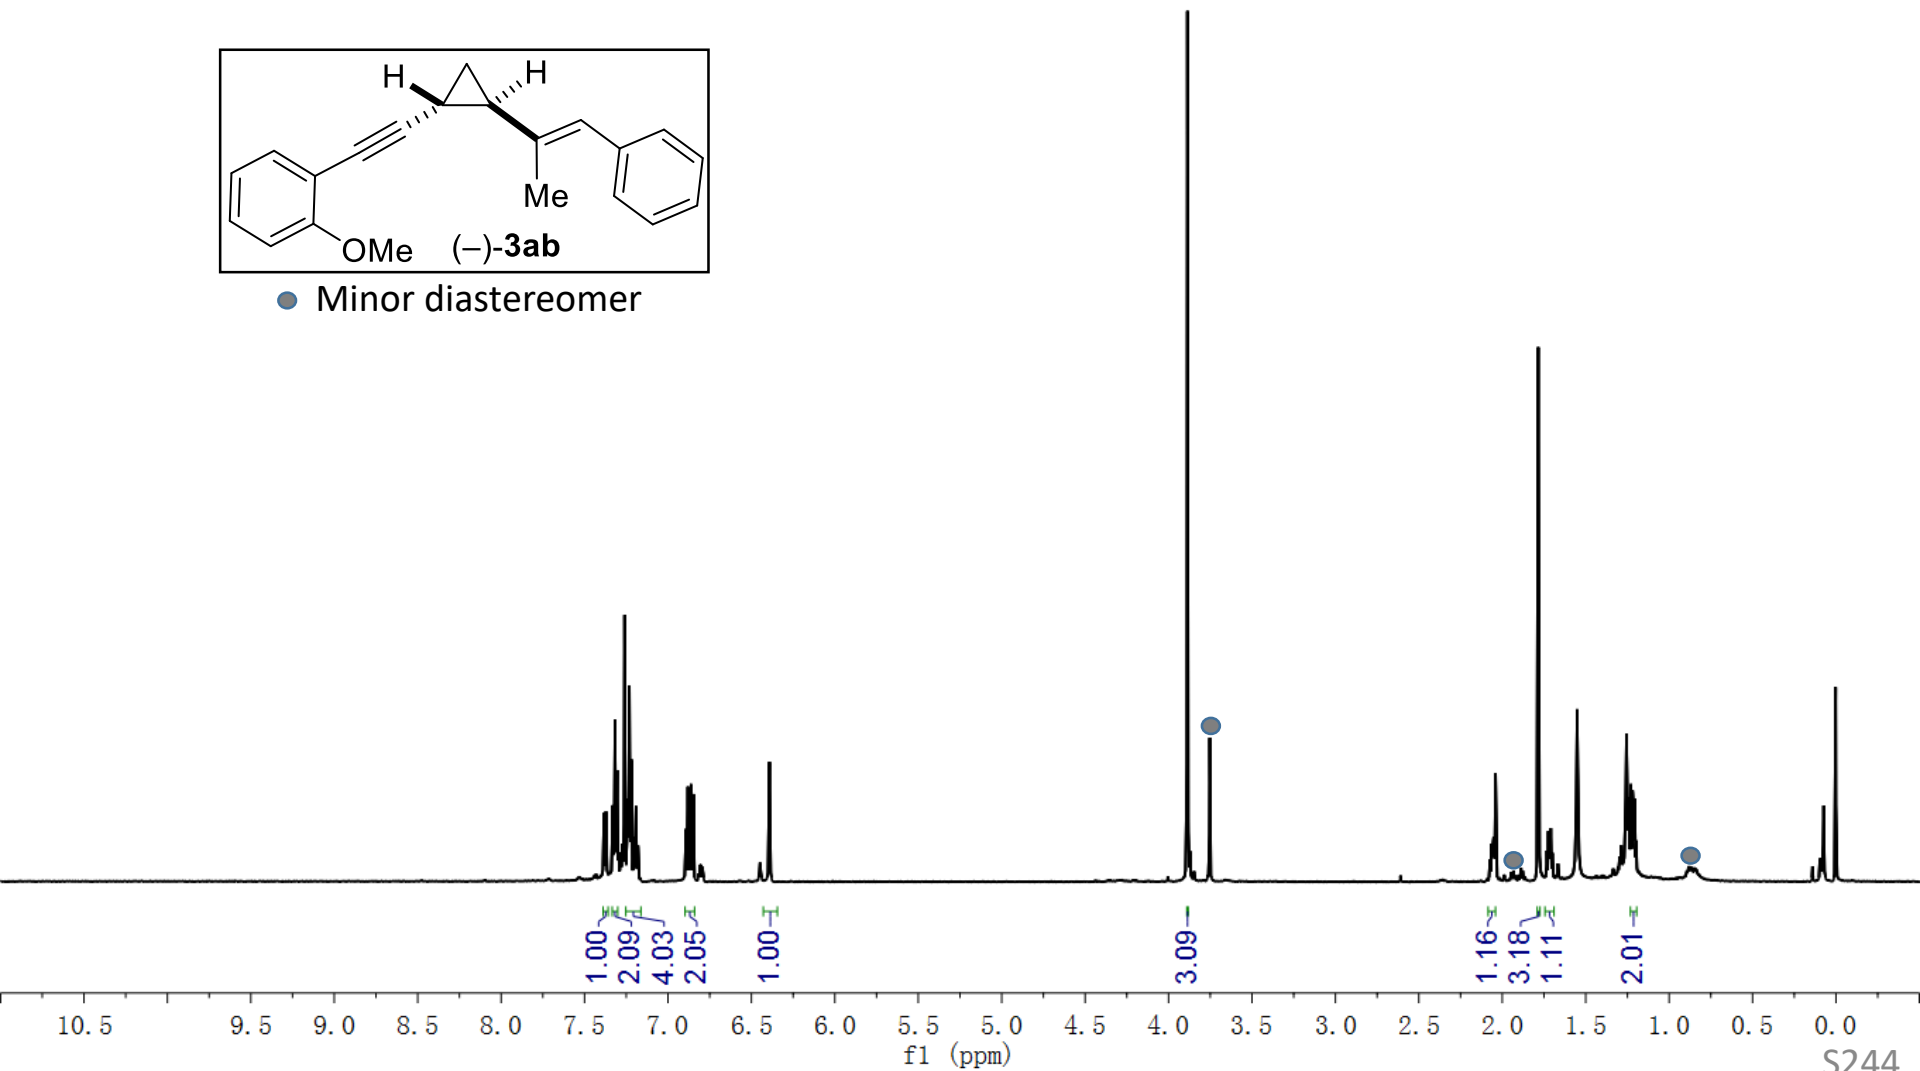

# $^{13}\text{C}$ NMR of **3ab**, 151 MHz, $\text{CDCl}_3$

—160.126

138.159

136.810

133.832

129.079

128.977

128.223

126.223

125.295

120.543

113.003

110.653

—96.657

77.372

77.166

76.948

72.971

—55.937

—31.409

15.727

15.328

—8.524

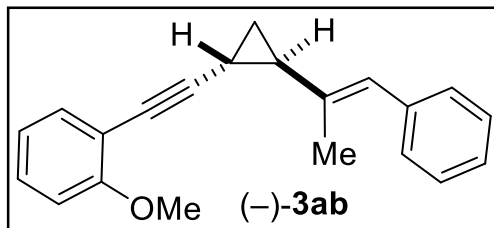

● Minor diastereomer

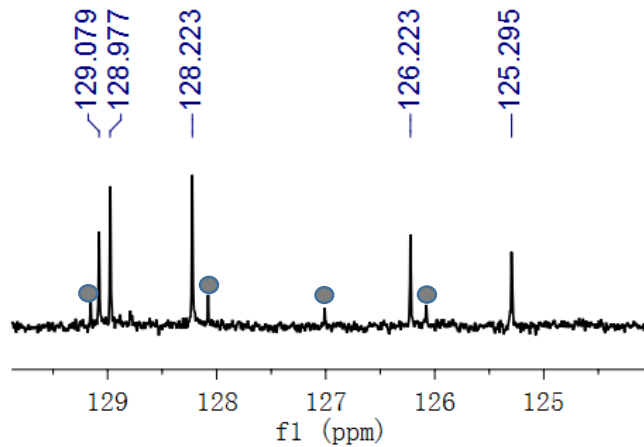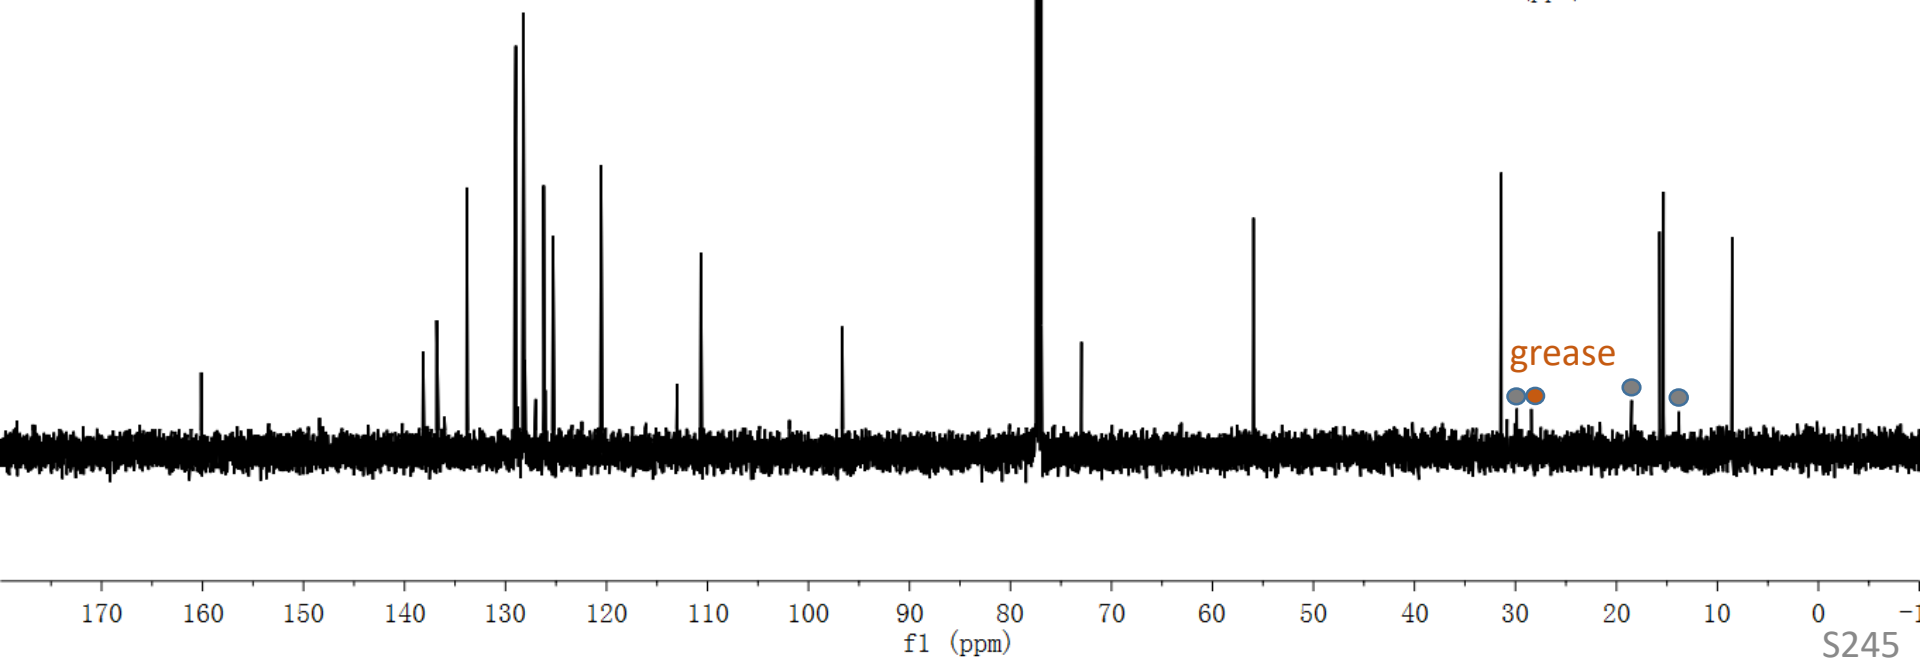

grease

Data File : JOK-0572-IB-2-0.5%-0.8mL.lcd  
 Sample Name : JOK-0572-IB-2-0.5%-0.8mL  
 Sample ID : JOK-0572-IB-2-0.5%-0.8mL  
 Method File : JOK-0.5%--50min-0.8ml.lcm  
 Chromatogram

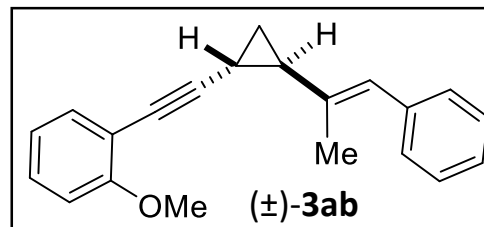

mAU

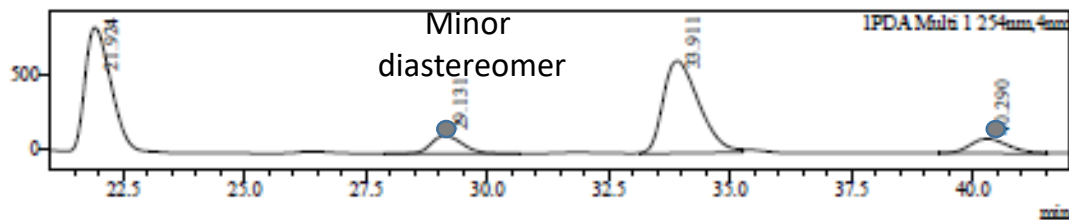

UV Spectrum  
 Retention time = 21.924

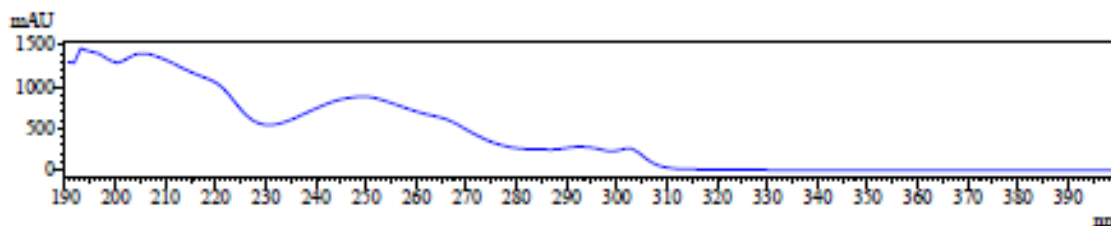

UV Spectrum  
 Retention time = 29.131

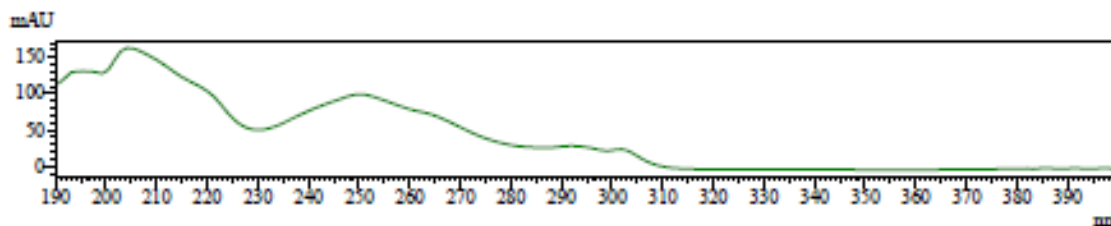

Peak Table

PDA Ch1 254nm

| Peak# | Ret. Time | Area     | Area%   |
|-------|-----------|----------|---------|
| 1     | 21.924    | 32295768 | 43.019  |
| 2     | 29.131    | 5296135  | 7.055   |
| 3     | 33.911    | 32148350 | 42.822  |
| 4     | 40.290    | 5333635  | 7.105   |
| Total |           | 75073888 | 100.000 |

Data File : JOK-0571-IB-0.5%-0.8ML.lcd  
 Sample Name : JOK-0571-IB-0.5%-0.8ML  
 Sample ID : JOK-0571-IB-0.5%-0.8ML  
 Method File : JOK-0.5%-50min-0.8ml.lcm  
 Chromatogram

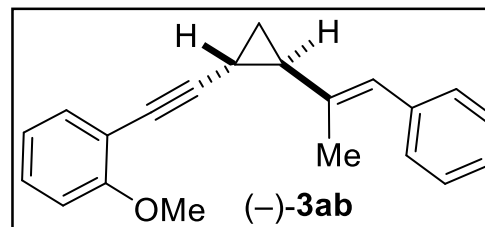

mAU

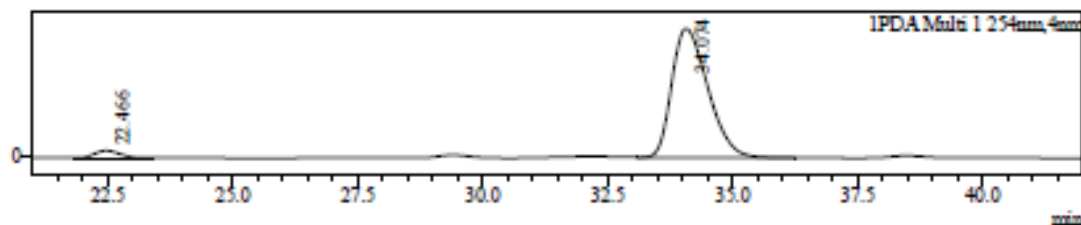

UV Spectrum  
 Retention time = 22.466

mAU

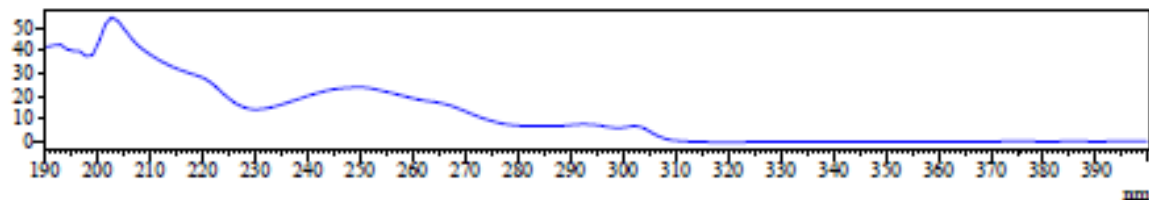

UV Spectrum  
 Retention time = 34.074

mAU

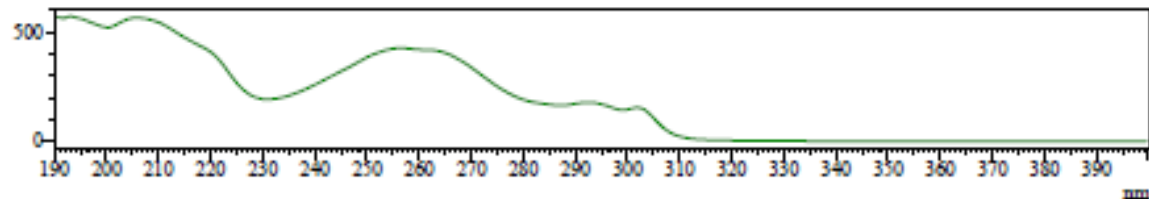

Peak Table

PDA Ch1 254nm

| Peak# | Ret. Time | Area     | Area%   |
|-------|-----------|----------|---------|
| 1     | 22.466    | 796063   | 3.676   |
| 2     | 34.074    | 20857854 | 96.324  |
| Total |           | 21653917 | 100.000 |

# $^1\text{H}$ NMR of **3ac** 600 MHz, $\text{CDCl}_3$

7.390  
7.384  
7.378  
7.374  
7.365  
7.363  
7.353  
7.350  
7.281  
7.275  
7.271  
7.270  
7.260  
7.259  
7.256  
7.255  
7.253  
7.242  
7.240  
6.891  
6.878  
6.866  
6.860

3.878

1.976  
1.969  
1.967  
1.962  
1.952  
1.940  
1.936  
1.933  
1.926  
1.918

1.355  
1.345  
1.340  
1.339  
1.334  
1.330  
1.327  
1.325  
1.324  
1.320

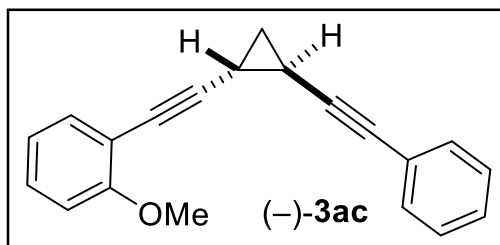

● Minor diastereomer

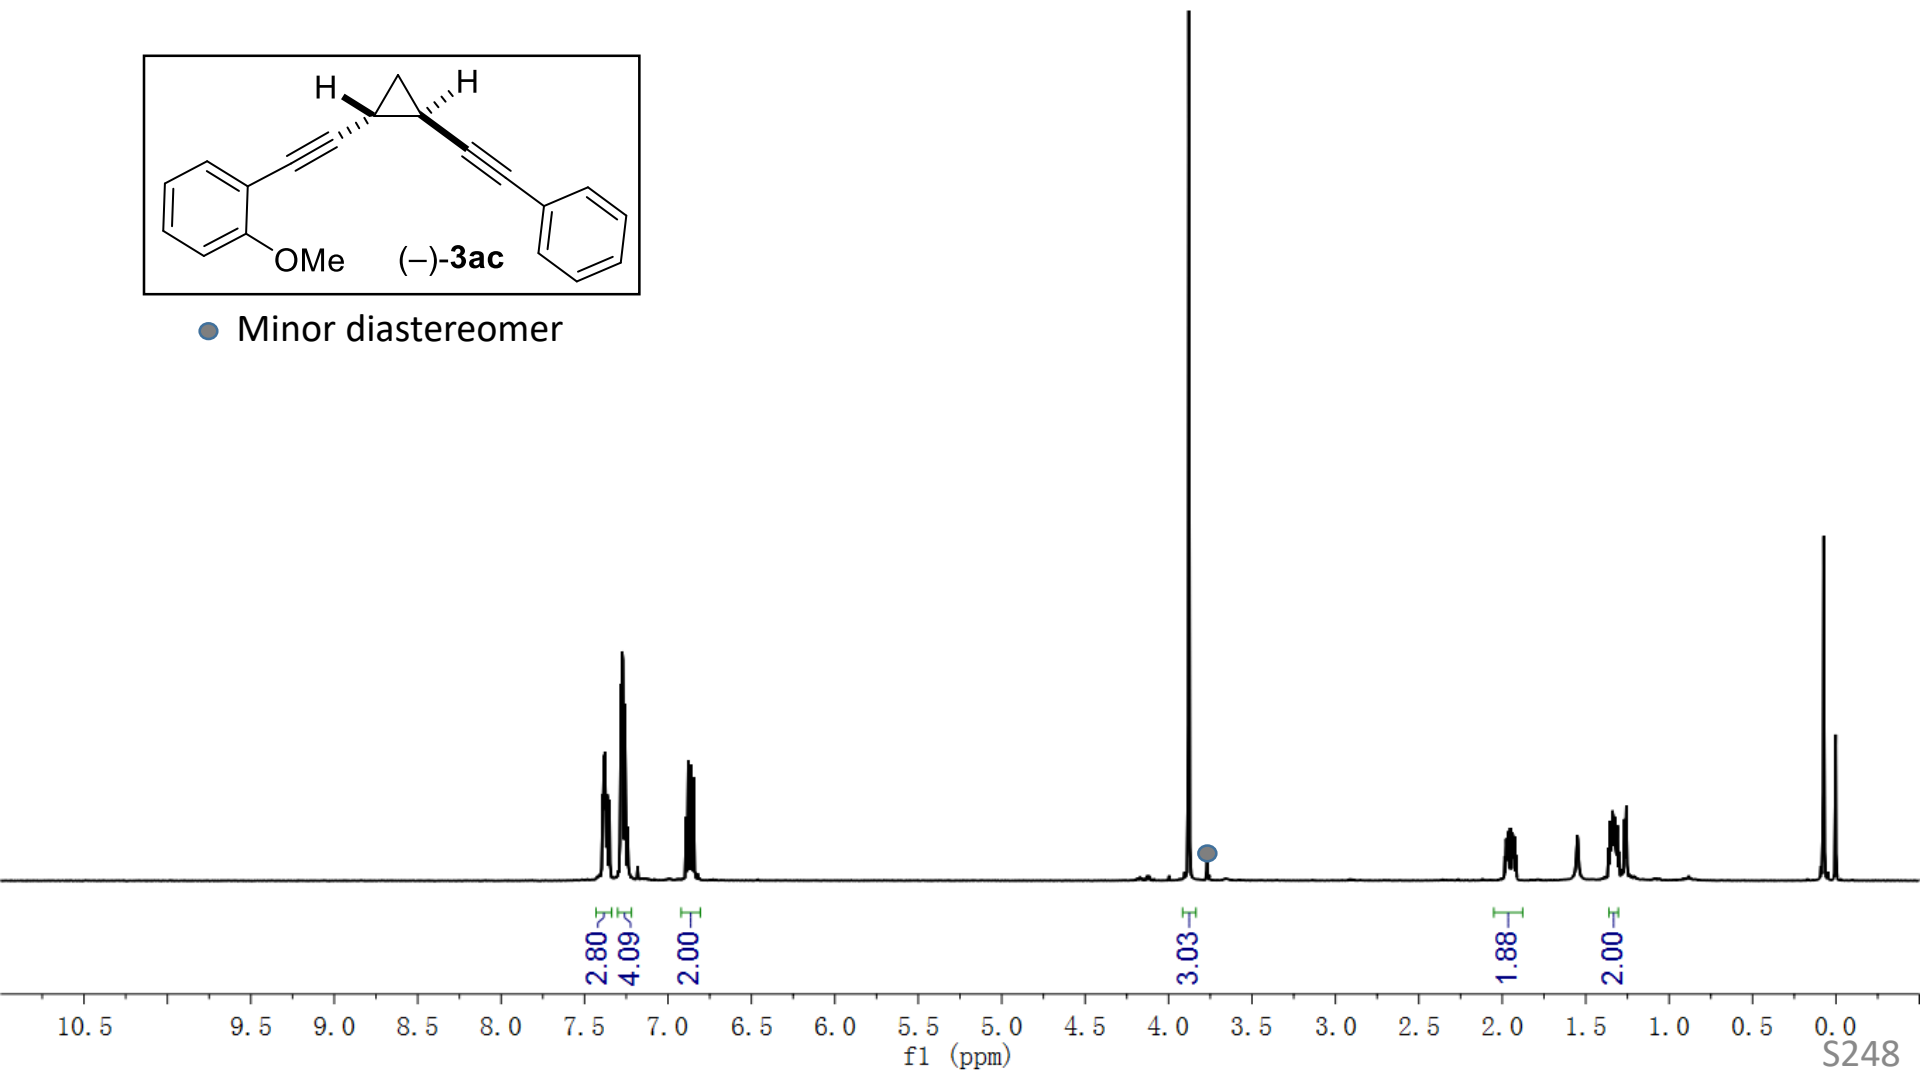



<sup>13</sup>C NMR of **3ac**, 151 MHz, CDCl<sub>3</sub>

- 160.260
- 133.900
- 131.821
- 129.419
- 128.364
- 127.952
- 123.539
- 120.554
- 112.557
- 110.692
- 94.486
- 90.553
- 77.882
- 77.372
- 77.160
- 76.948
- 74.056
- 55.924
- 18.619
- 12.076
- 11.877

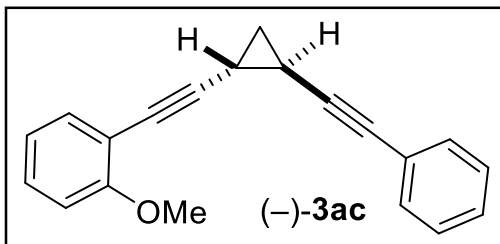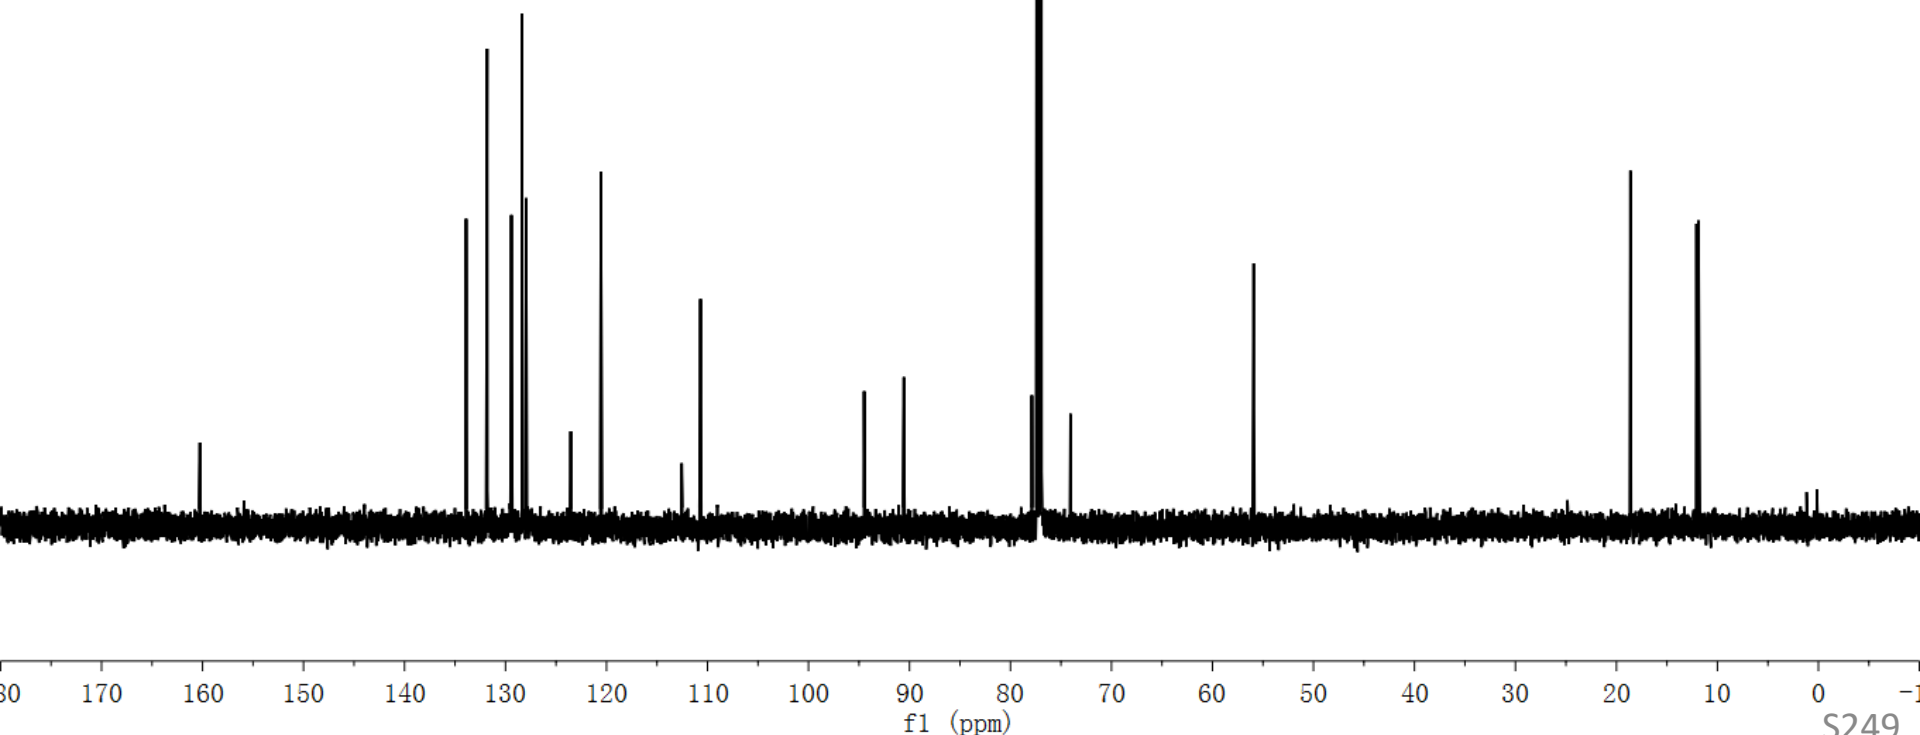

Data File : JOK-0168-IC-1%-0.8ML-isopropanol-solvent003.lcd  
 Sample Name : JOK-0168-IC-1%-0.8ML-isopropanol-solvent003  
 Sample ID : JOK-0168-IC-1%-0.8ML-isopropano  
 Method File : JOK-1%-0.8ml.lcm

Chromatogram

AU

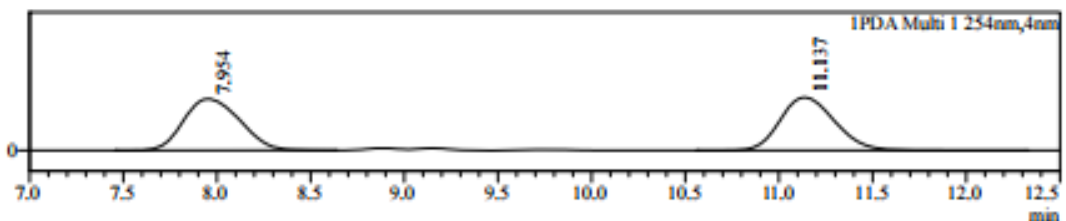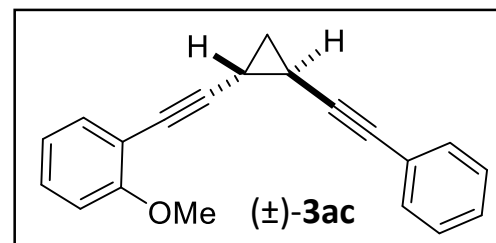

UV Spectrum  
 Retention time = 7.954

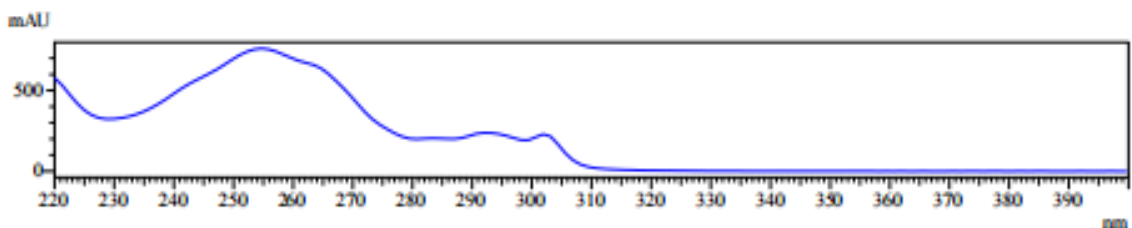

UV Spectrum  
 Retention time = 11.137

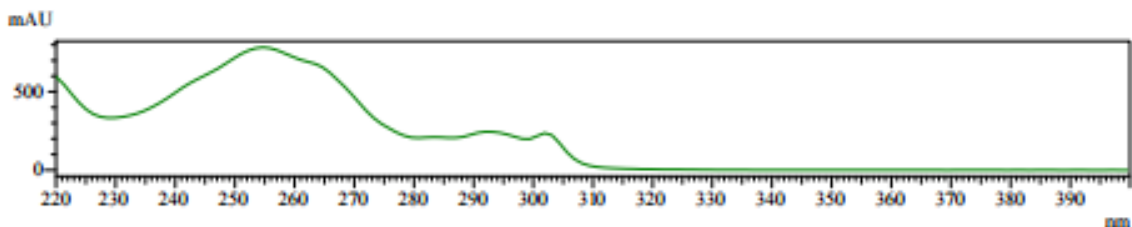

Peak Table

PDA Ch1 254nm

| Peak# | Ret. Time | Area     | Area%   |
|-------|-----------|----------|---------|
| 1     | 7.954     | 15546478 | 50.007  |
| 2     | 11.137    | 15542218 | 49.993  |
| Total |           | 31088696 | 100.000 |

Data File : J0K-0167-IC-1%-0.8ML-isopropanol-solvent003.lcd  
 Sample Name : J0K-0167-IC-1%-0.8ML-isopropanol-solvent003  
 Sample ID : J0K-0167-IC-1%-0.8ML-isopropano  
 Method File : J0K-1%-0.8ml.lcm

Chromatogram

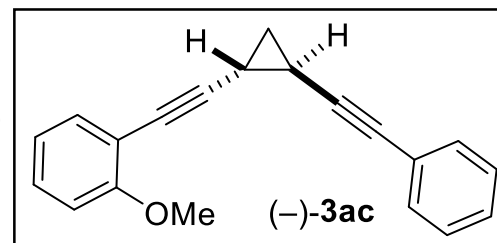

mAU

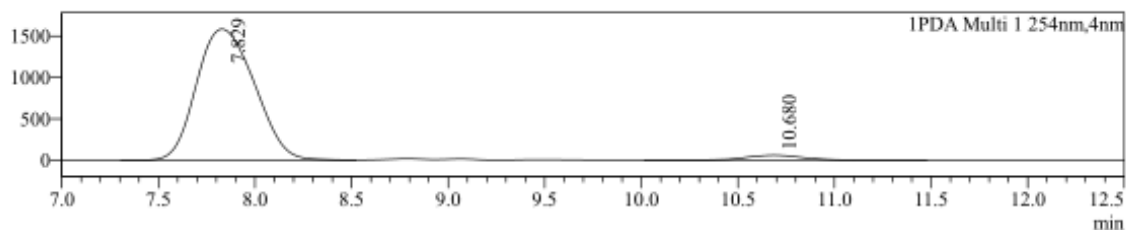

UV Spectrum  
 Retention time = 7.829

mAU

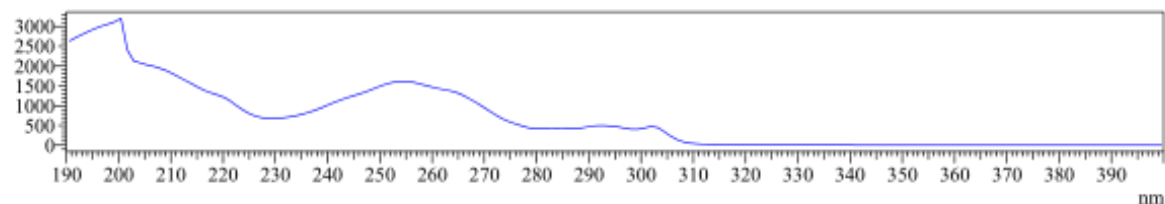

UV Spectrum  
 Retention time = 10.680

mAU

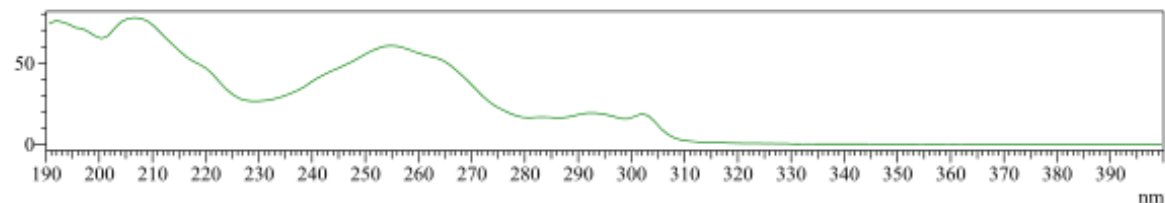

Peak Table

PDA Ch1 254nm

| Peak# | Ret. Time | Area     | Area%   |
|-------|-----------|----------|---------|
| 1     | 7.829     | 32959040 | 96.411  |
| 2     | 10.680    | 1227035  | 3.589   |
| Total |           | 34186075 | 100.000 |

# $^1\text{H}$ NMR of **3ad**, 600 MHz, $\text{CDCl}_3$

7.362, 7.358, 7.347, 7.343, 7.266, 7.262, 7.260, 7.251, 7.249, 7.248, 7.234, 7.231, 6.890, 6.888, 6.875, 6.873, 6.858, 6.840, -3.875, 2.011, 1.999, 1.996, 1.994, 1.981, 1.365, 1.352, 1.350, 1.347, 1.335

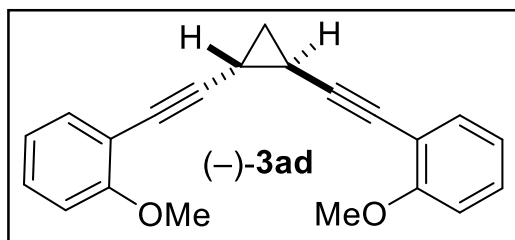

● Minor diastereomer

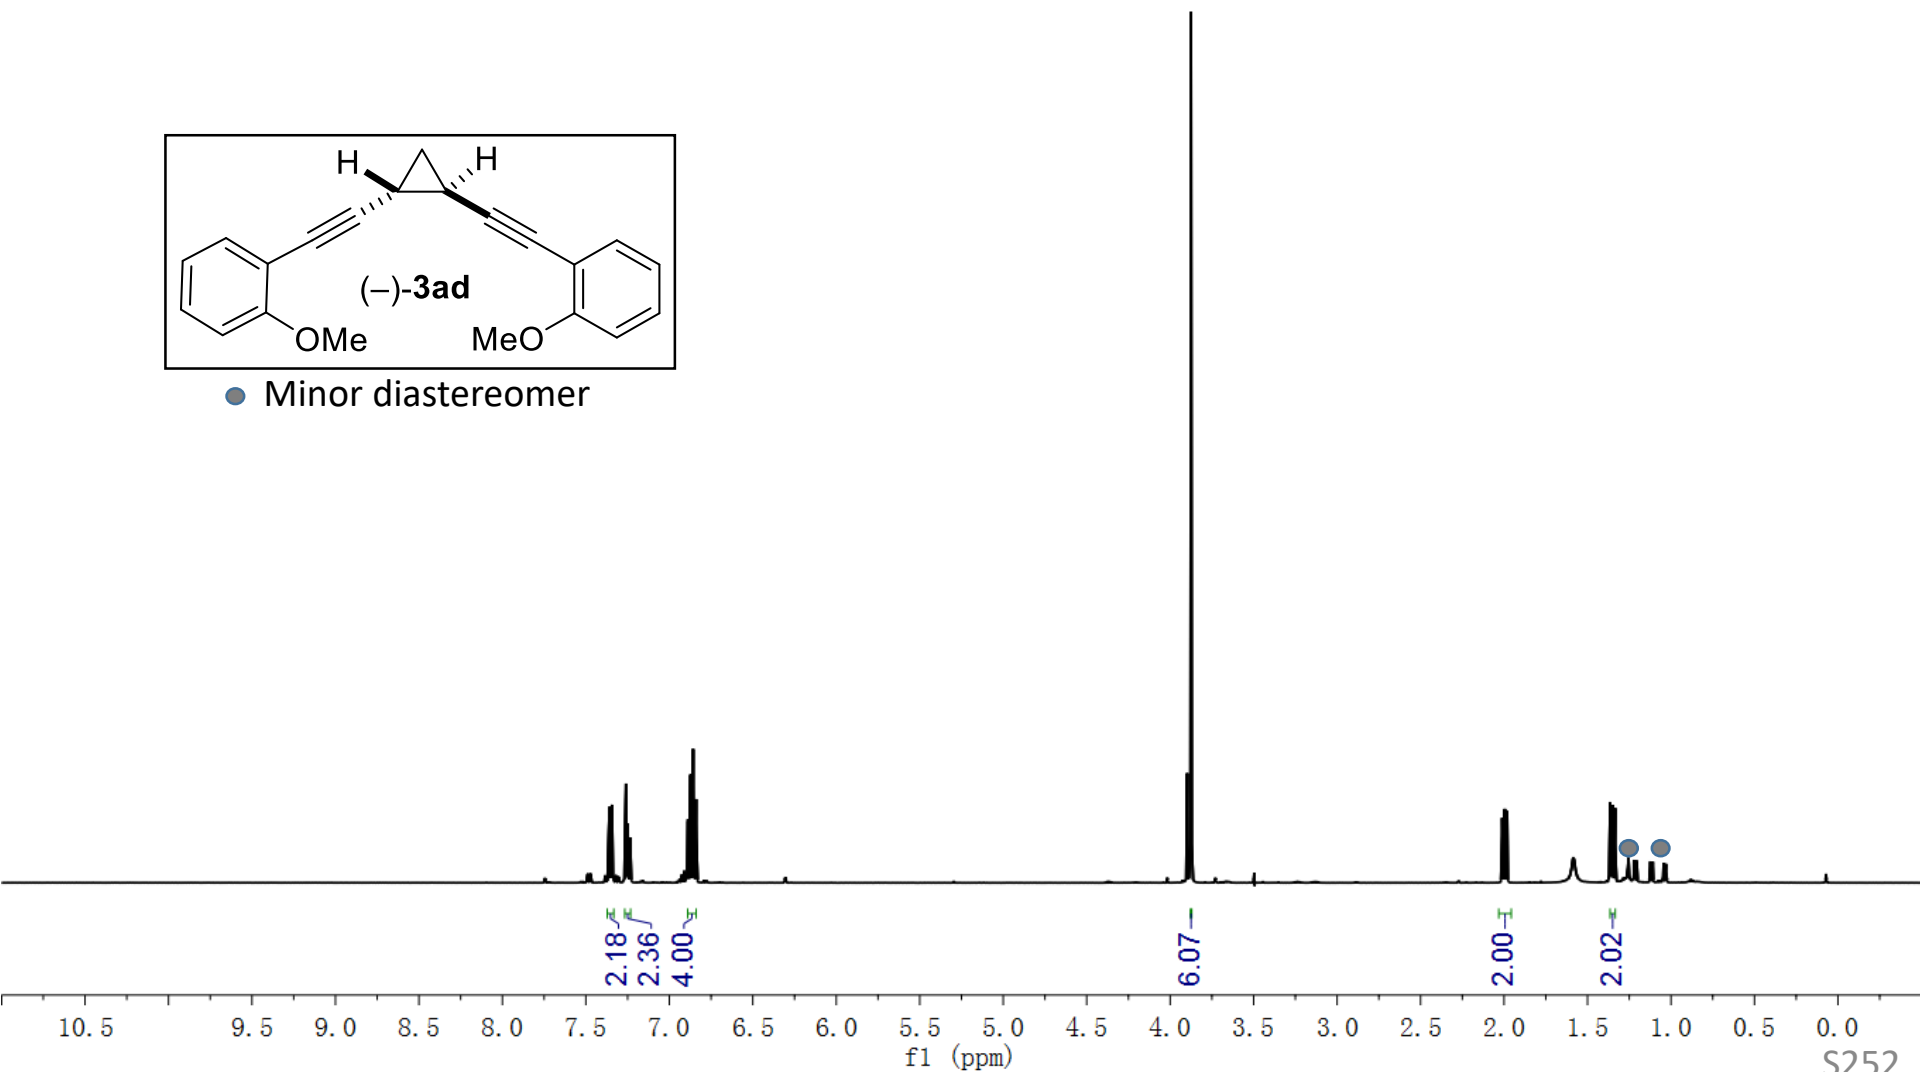

$^{13}\text{C}$  NMR of **3ad**, 151 MHz,  $\text{CDCl}_3$

—160.259

—133.896

—129.360

—120.535

—112.630

—110.688

—94.659

—77.414

—77.160

—76.906

—73.984

—55.910

—18.793

—12.247

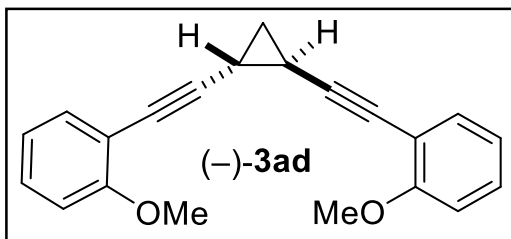

● Minor diastereomer

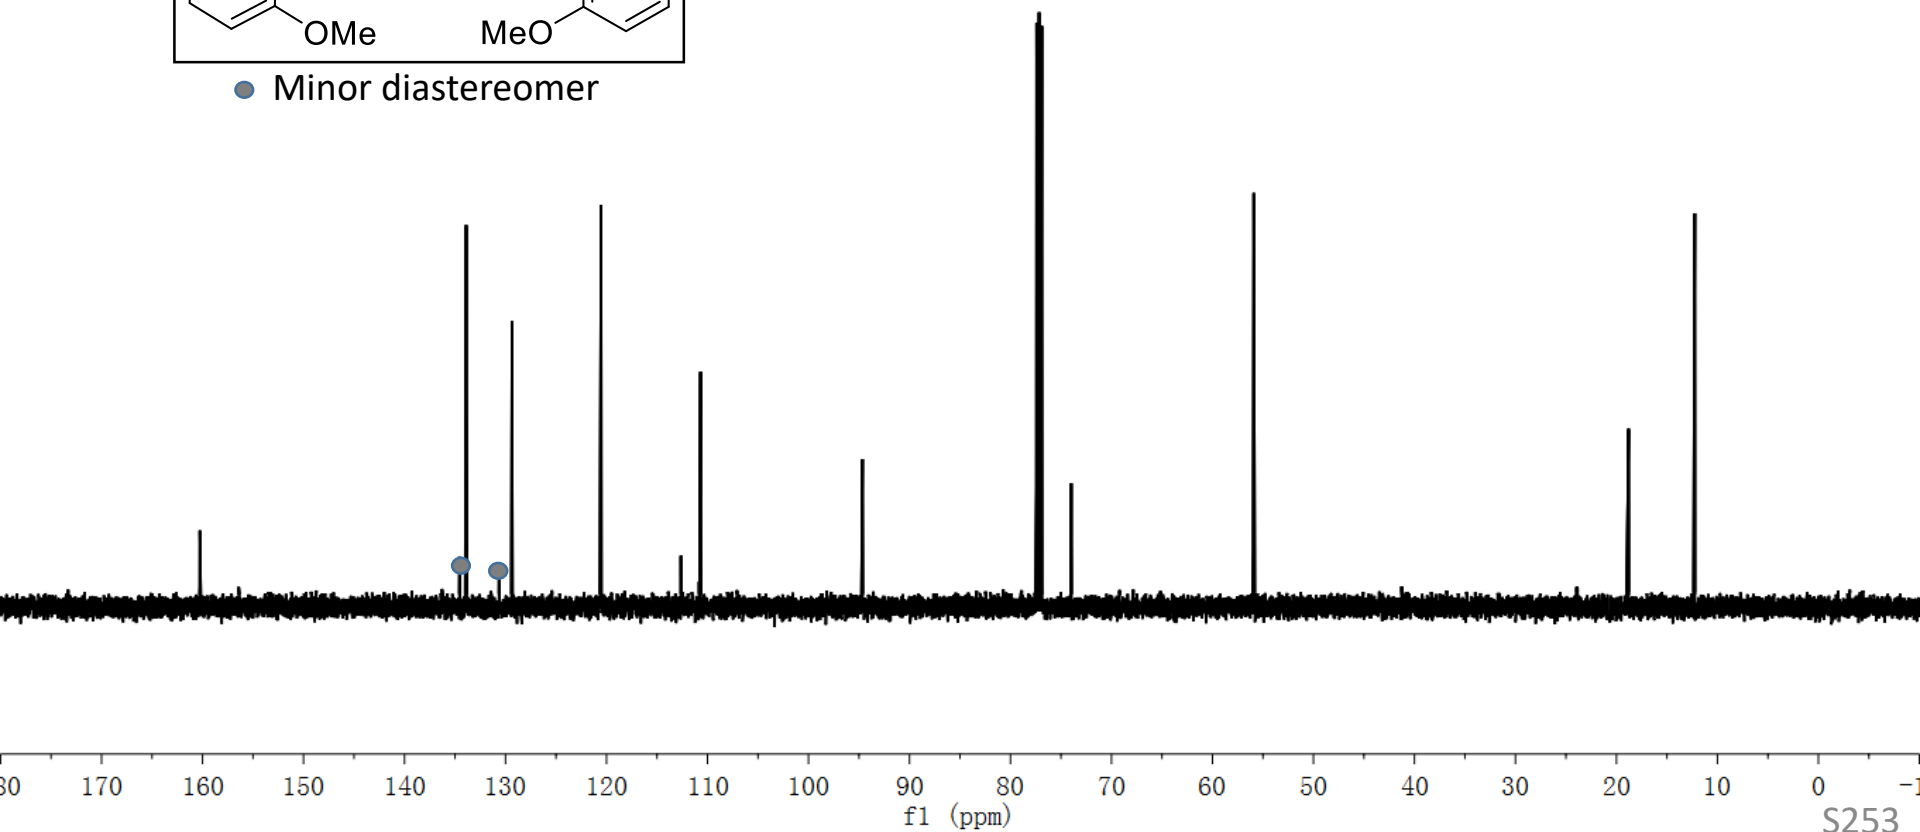

Data File : J0K-0831-IA--0.5%-1ML.lcd  
 Sample Name : J0K-0831-IA--0.5%-1ML  
 Sample ID : J0K-0831-IA--0.5%-1ML  
 Method File : J0K-0.5%--35min-1ml.lcm  
 Chromatogram

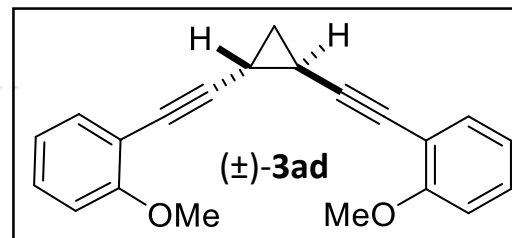

AU

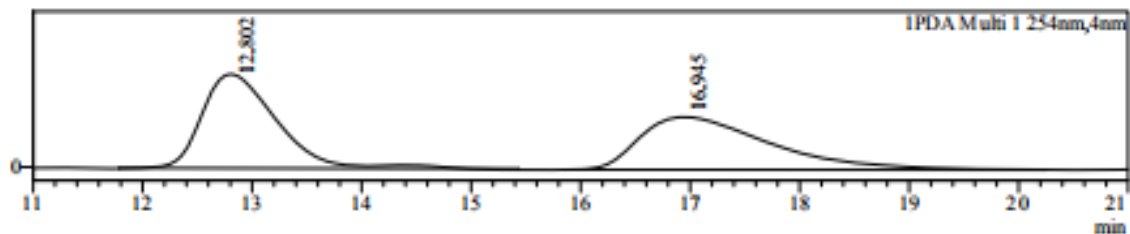

UV Spectrum  
 Retention time = 12.802

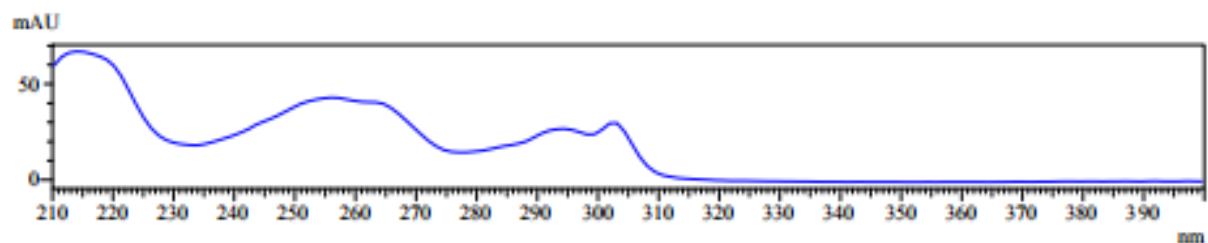

U  
 Retention time = 16.945

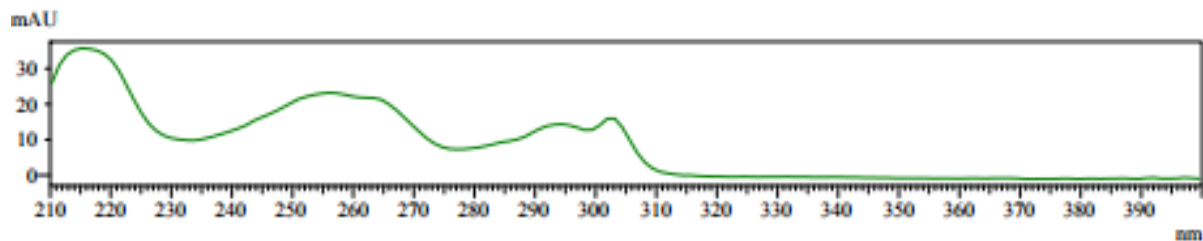

Peak Table

PDA Ch1 254nm

| Peak# | Ret. Time | Area    | Area%   |
|-------|-----------|---------|---------|
| 1     | 12.802    | 1979132 | 50.313  |
| 2     | 16.945    | 1954522 | 49.687  |
| Total |           | 3933655 | 100.000 |

Data File : J0K-0830-2-IA-0.5%-1ML.lcd  
 Sample Name : J0K-0830-2-IA-0.5%-1ML  
 Sample ID : J0K-0830-2-IA-0.5%-1ML  
 Method File : J0K-0.5%-35min-1ml.lcm  
 Chromatogram

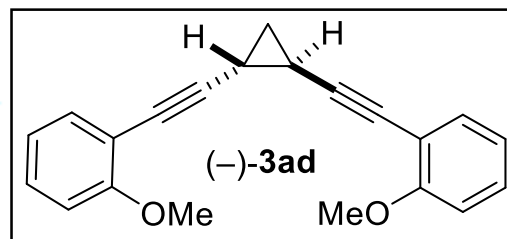

AU

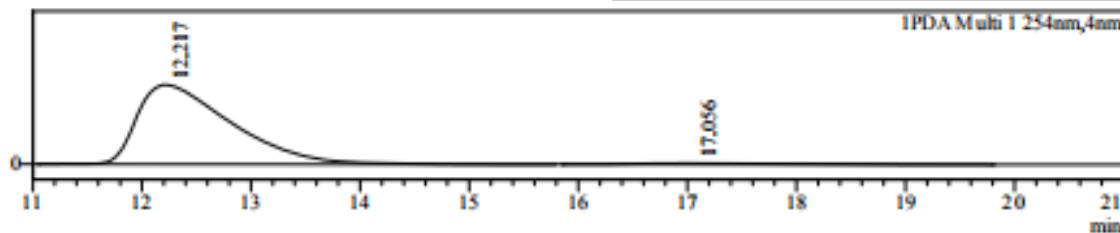

UV Spectrum  
 Retention time = 12.217

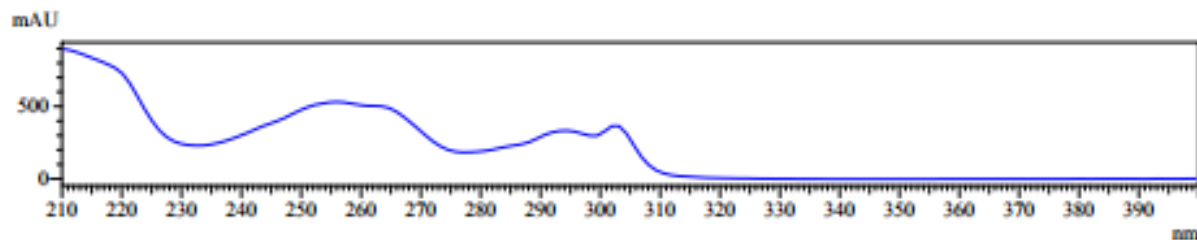

U  
 Retention time = 17.056

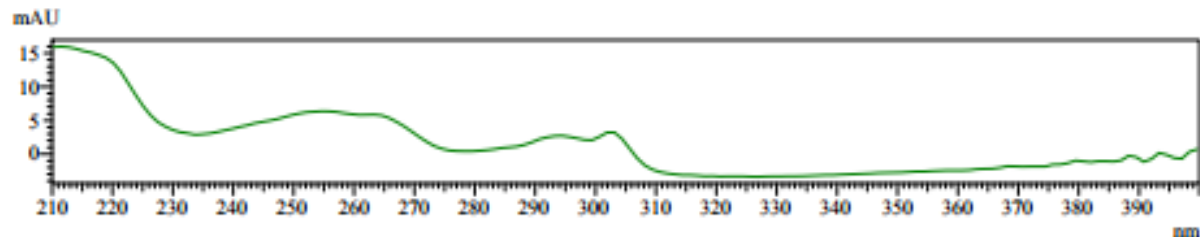

Peak Table

PDA Ch1 254nm

| Peak# | Ret. Time | Area     | Area%   |
|-------|-----------|----------|---------|
| 1     | 12.217    | 31115081 | 97.598  |
| 2     | 17.056    | 765709   | 2.402   |
| Total |           | 31880790 | 100.000 |

# <sup>1</sup>H NMR of **3ae**, 600 MHz, CDCl<sub>3</sub>

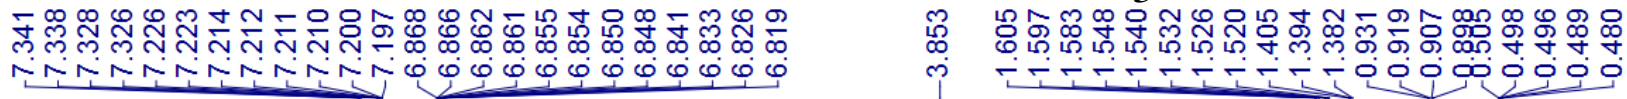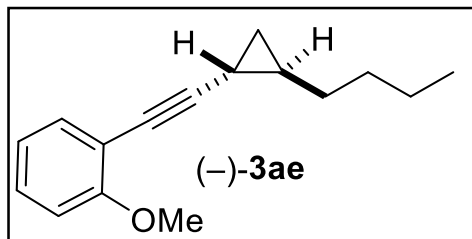

● Minor diastereomer

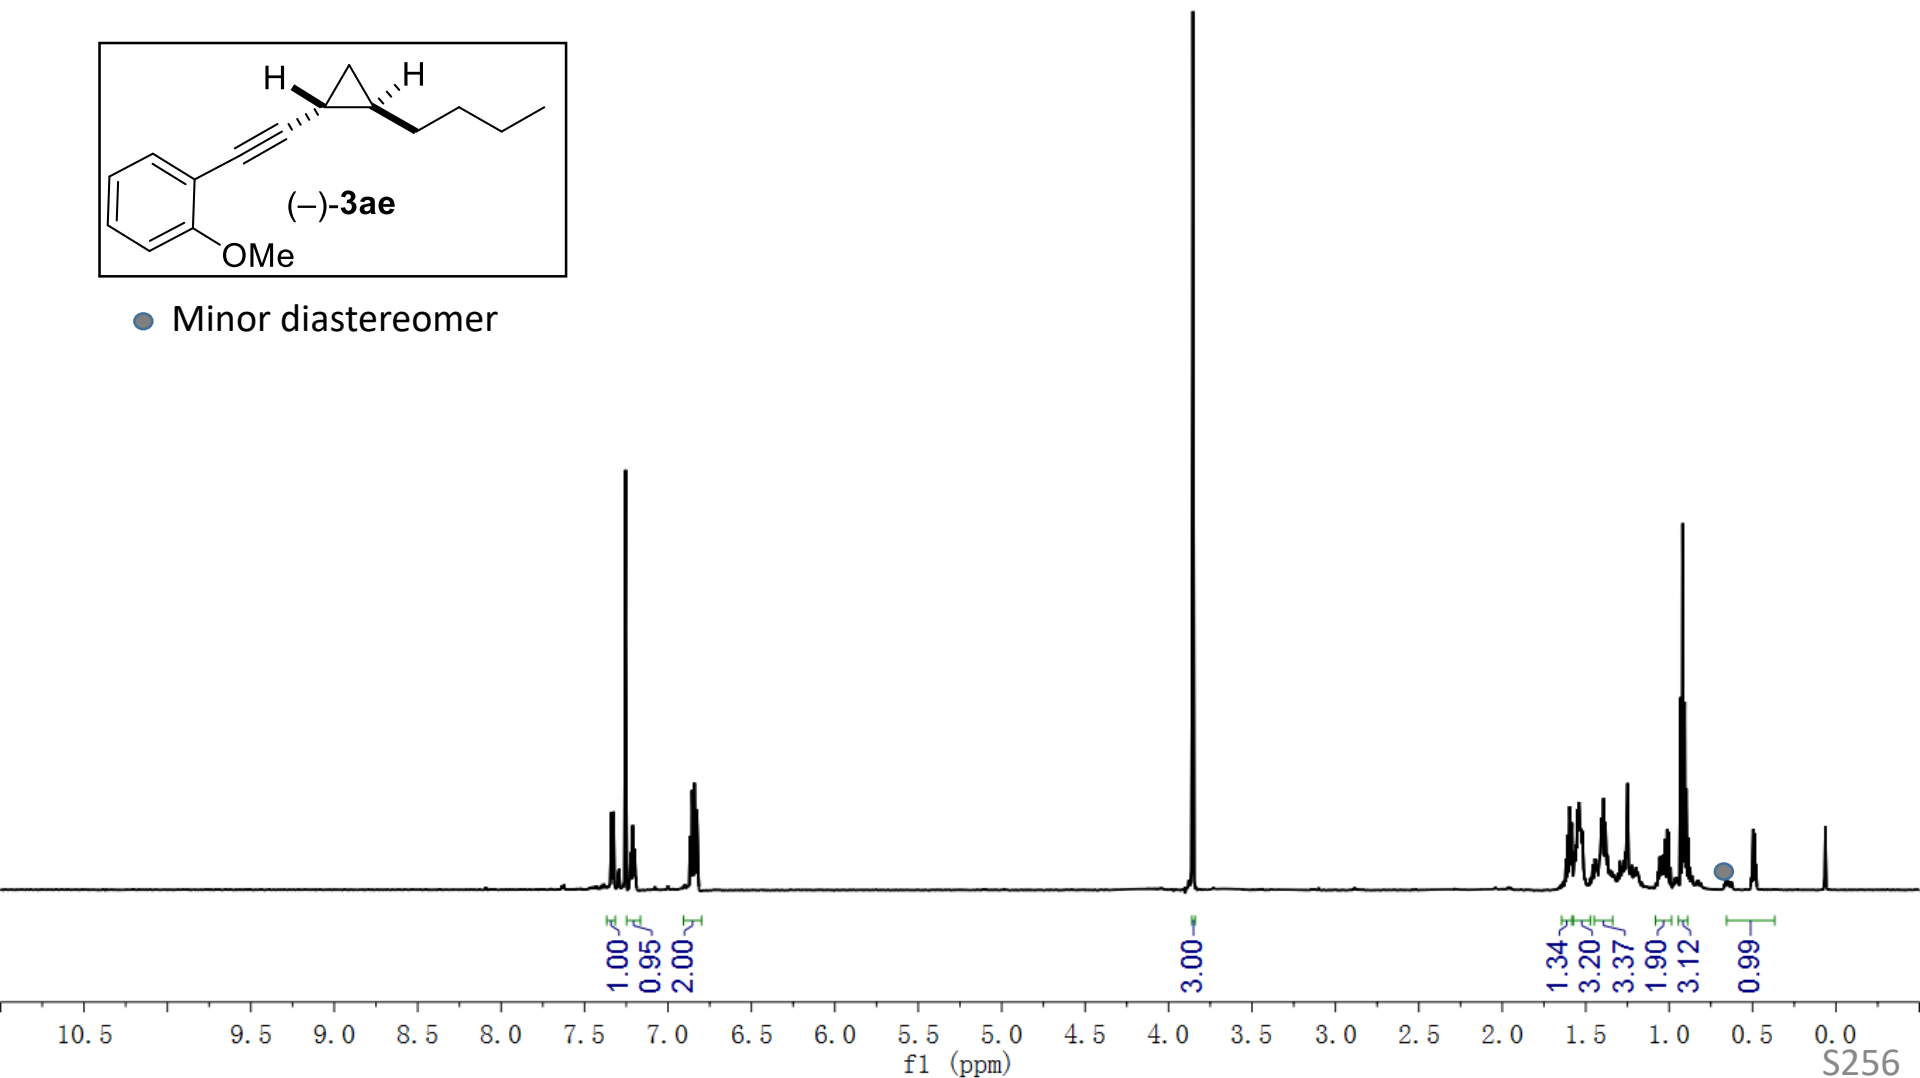



$^{13}\text{C}$  NMR of **3ae**, 151 MHz,  $\text{CDCl}_3$

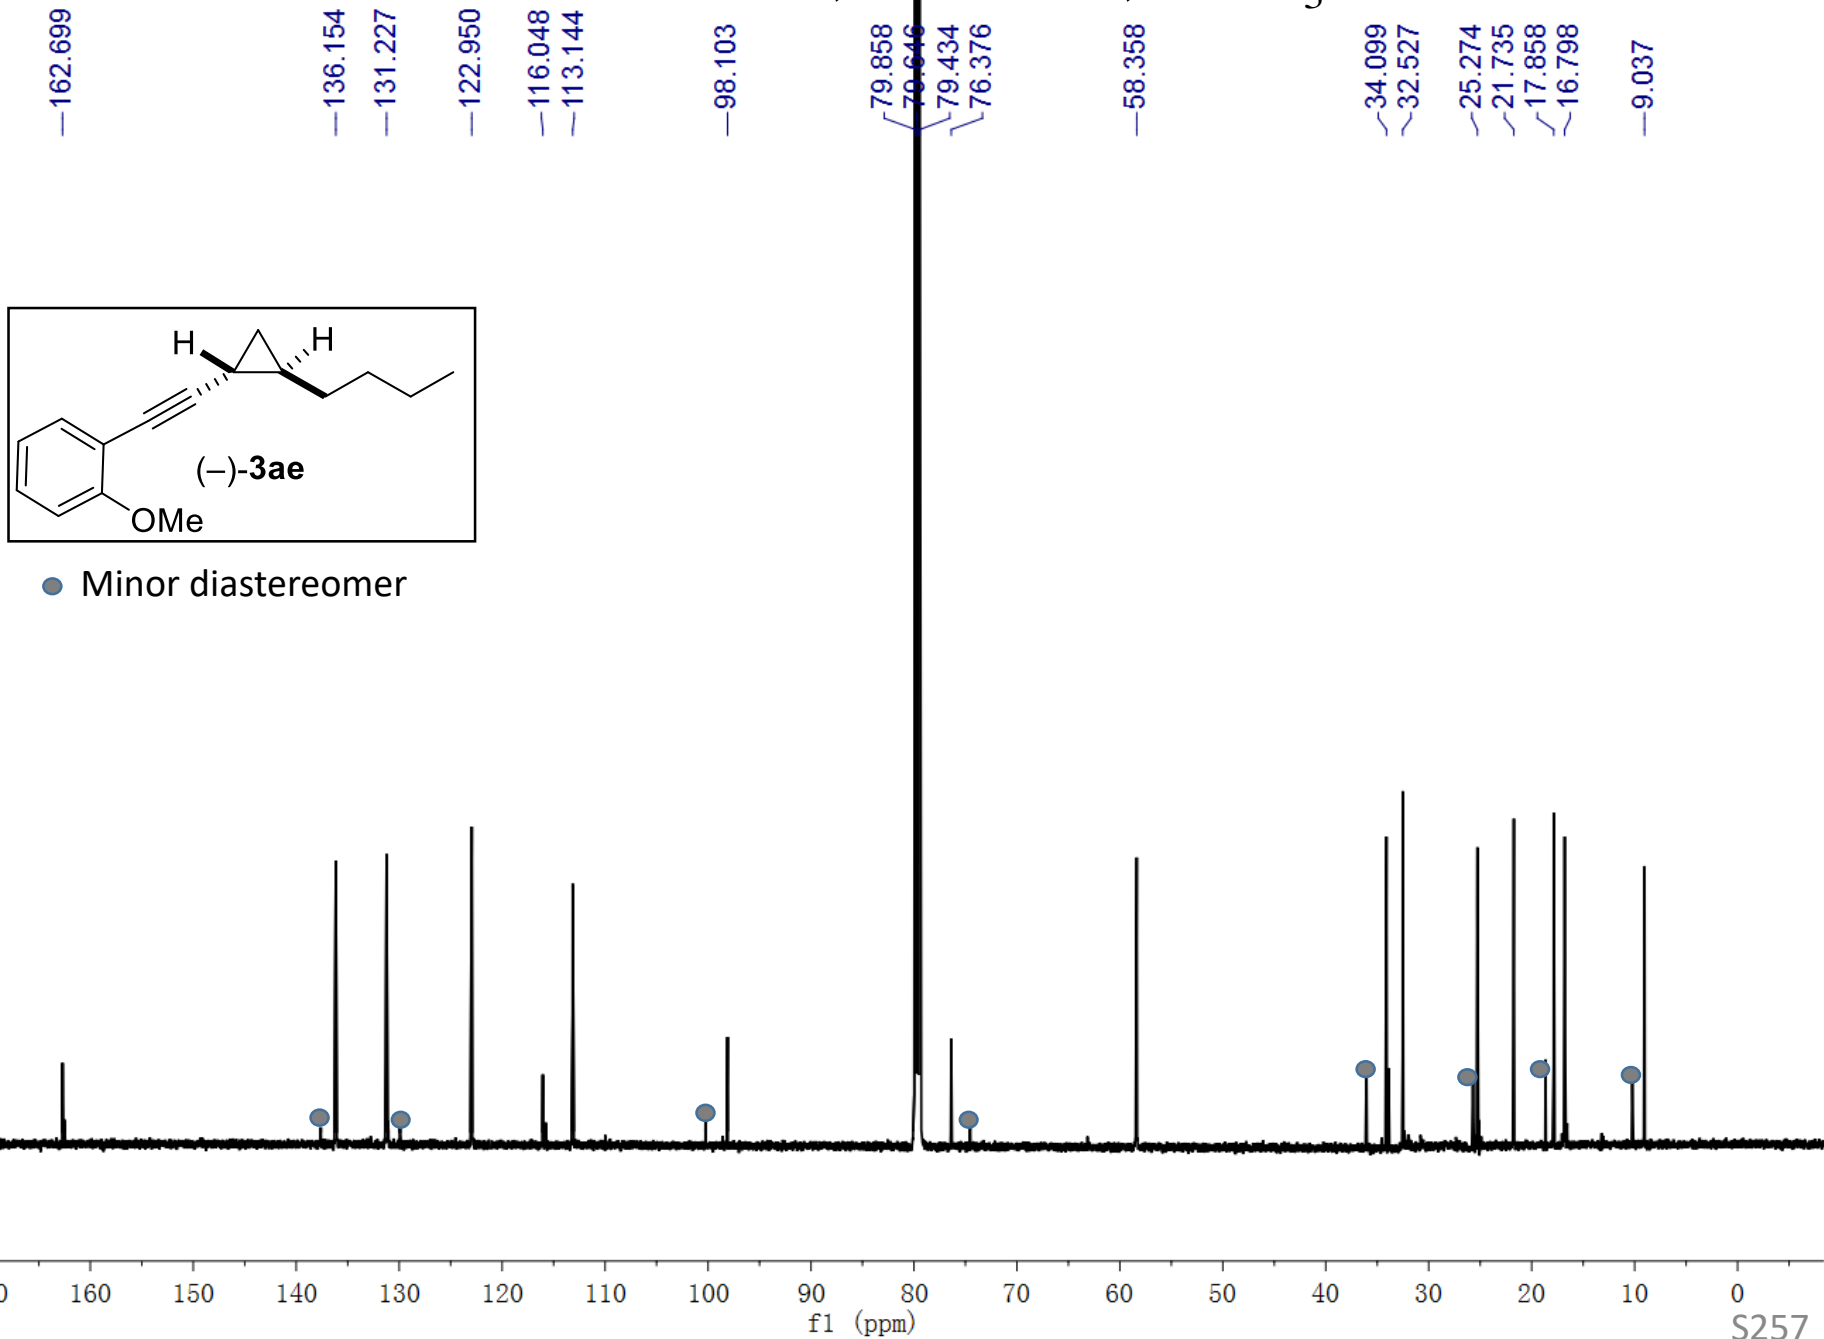

# ==== Shimadzu LabSolutions Analysis Report ====

JK-1857-IF-0.3%-0.8mL  
JK-0.3%-40min-0.8mL.lcm

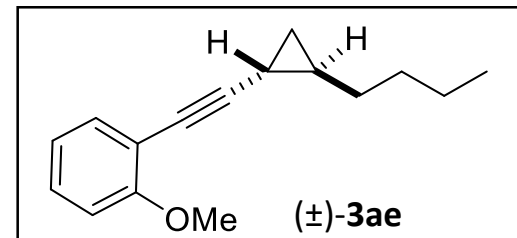

mAU

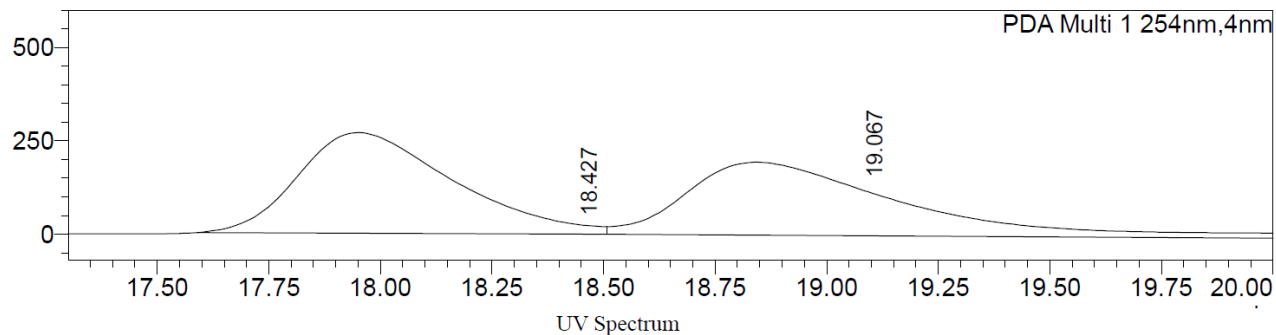

JK-1857-IF-0.3%-0.8mL\_002.lcd

mAU

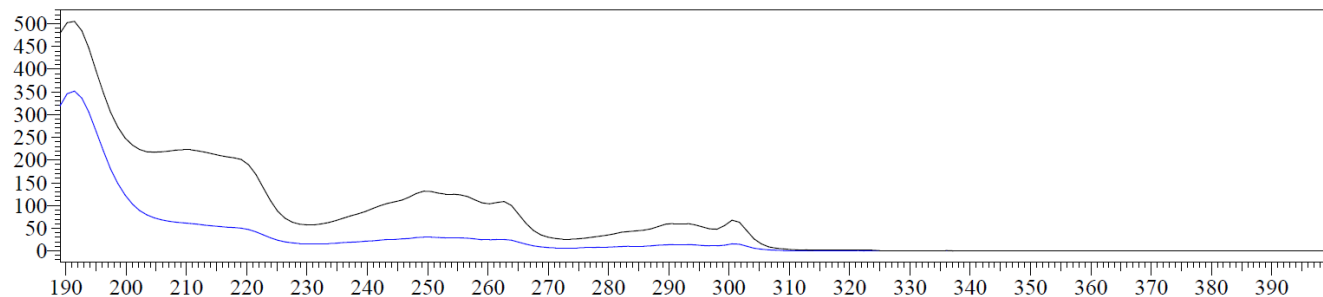

## Peak Table

PDA Ch1 254nm

| Peak# | Ret. Time | Area%   |
|-------|-----------|---------|
| 1     | 18.427    | 50.164  |
| 2     | 19.067    | 49.836  |
| Total |           | 100.000 |

# ==== Shimadzu LabSolutions Analysis Report ====

JK-1856-IF-0.3%-0.8mL  
JK-0.3%-40min-0.8mL.lcm

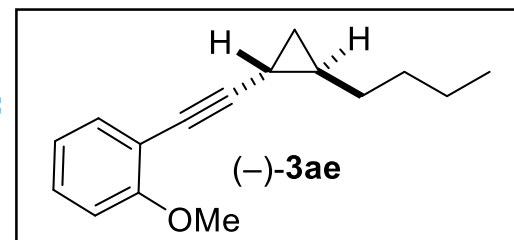

mAU

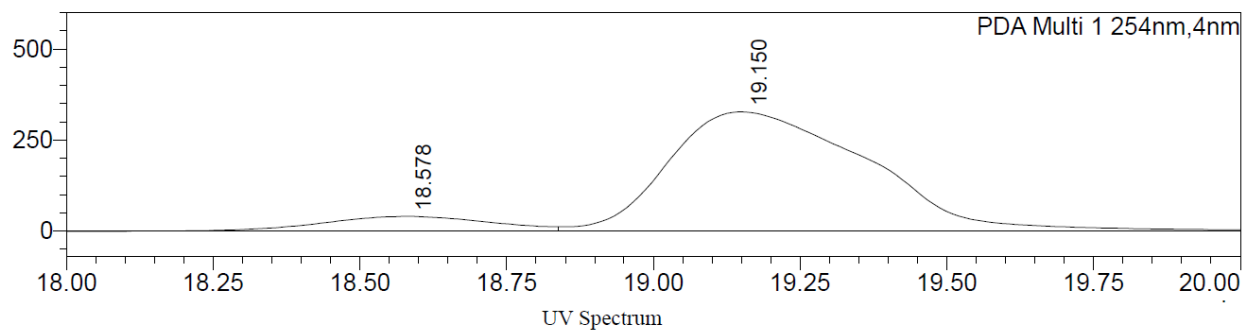

JK-1856-IF-0.3%-0.8mL\_001.lcd

mAU

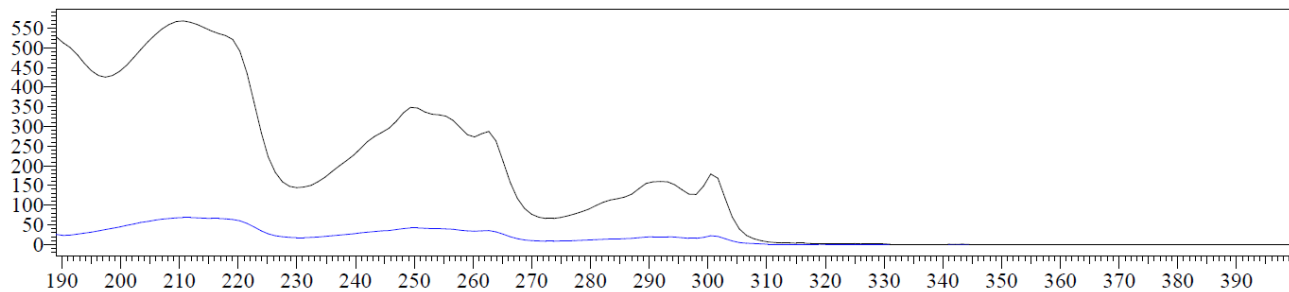

Peak Table

PDA Ch1 254nm

| Peak# | Ret. Time | Area%   |
|-------|-----------|---------|
| 1     | 18.578    | 9.502   |
| 2     | 19.150    | 90.498  |
| Total |           | 100.000 |

# $^1\text{H}$ NMR of **3af**, 500 MHz, $\text{CDCl}_3$

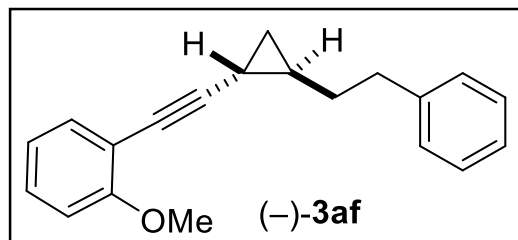

● Minor diastereomer

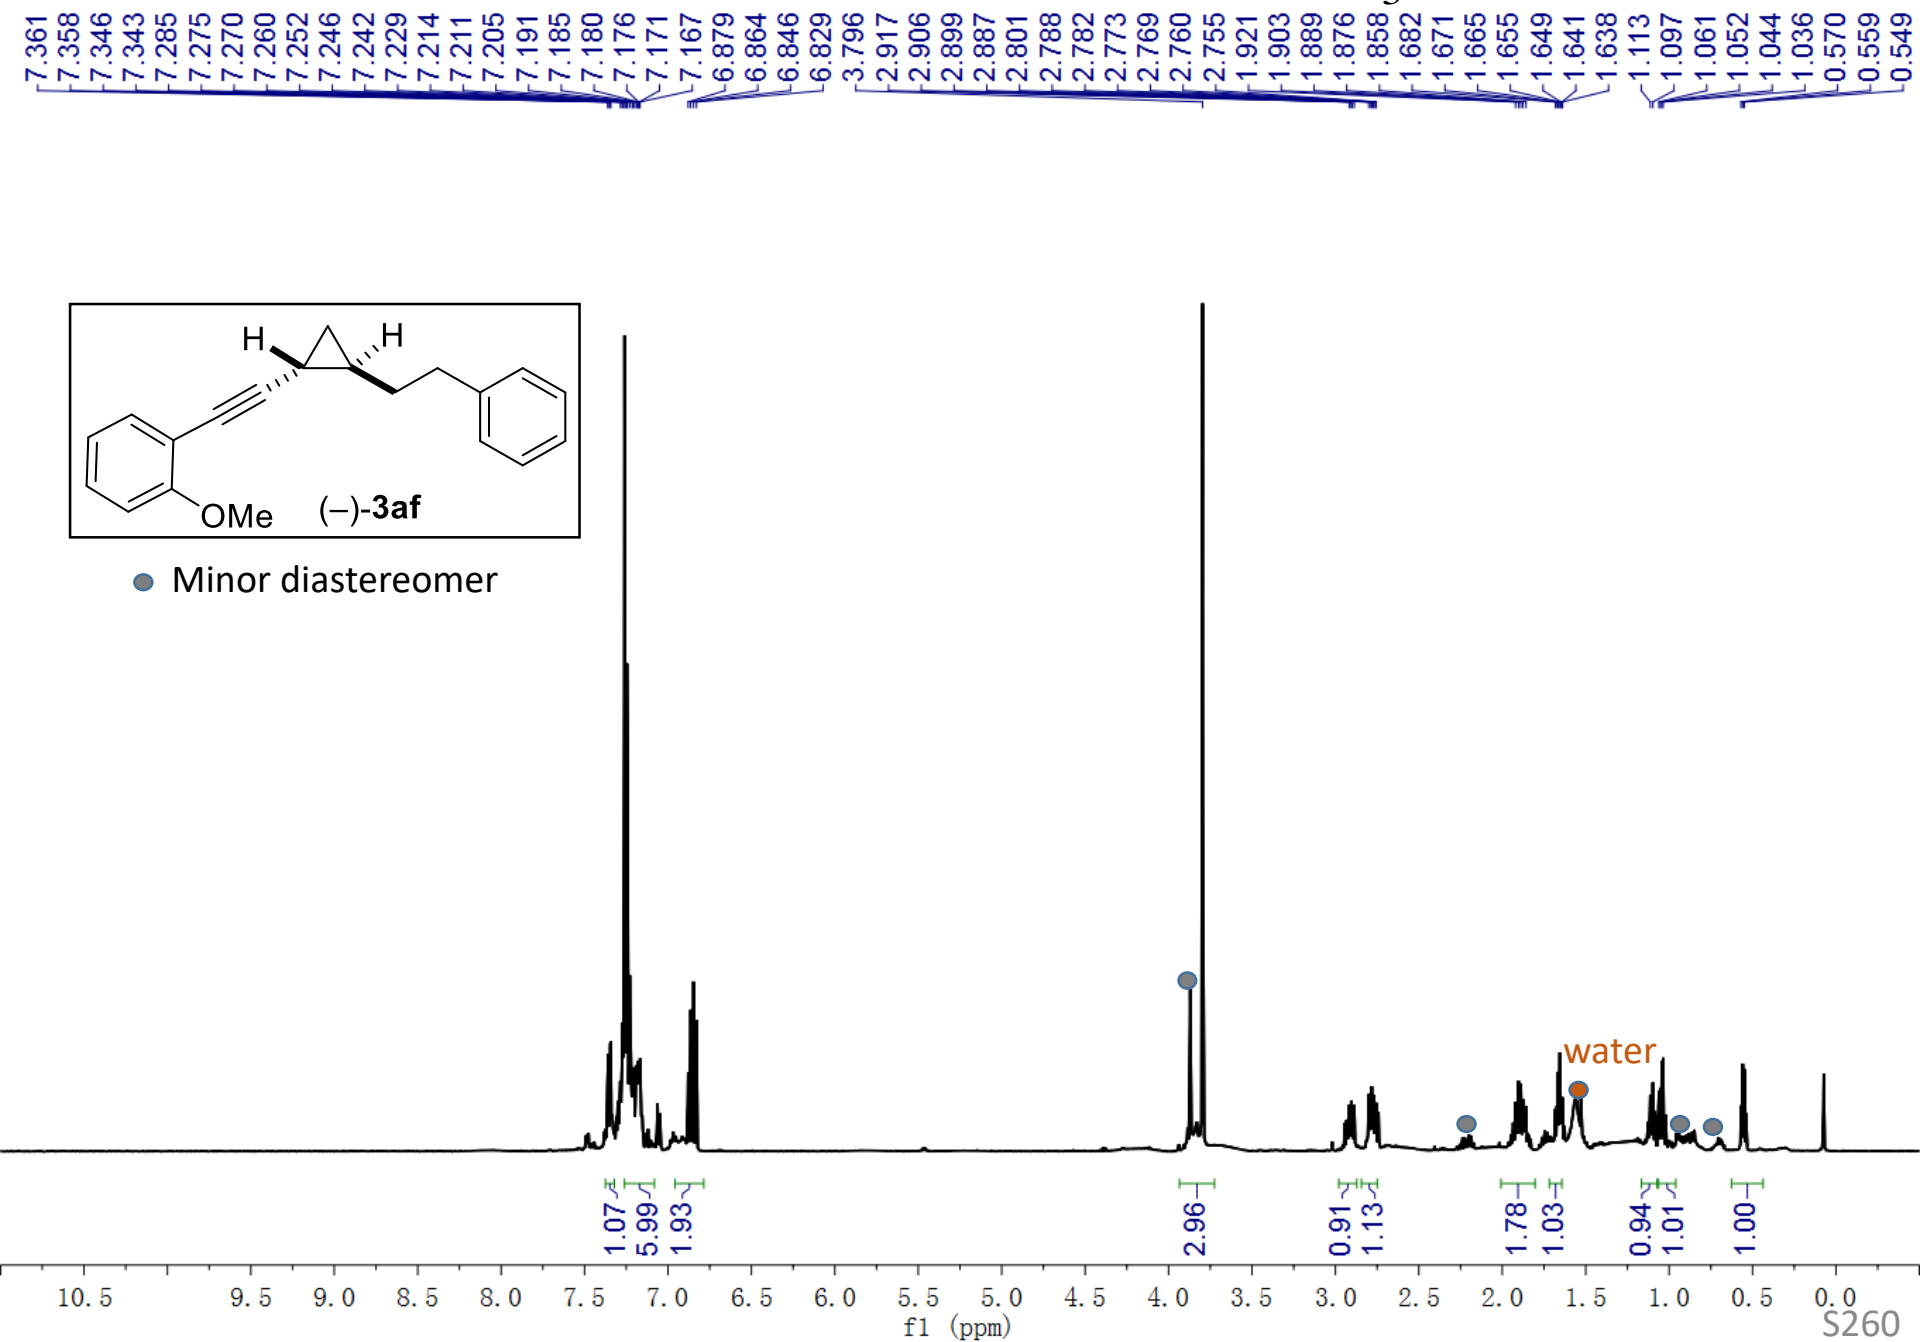

$^{13}\text{C}$  NMR of **3af**, 126 MHz,  $\text{CDCl}_3$

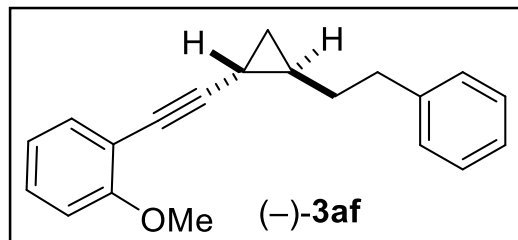

● Minor diastereomer

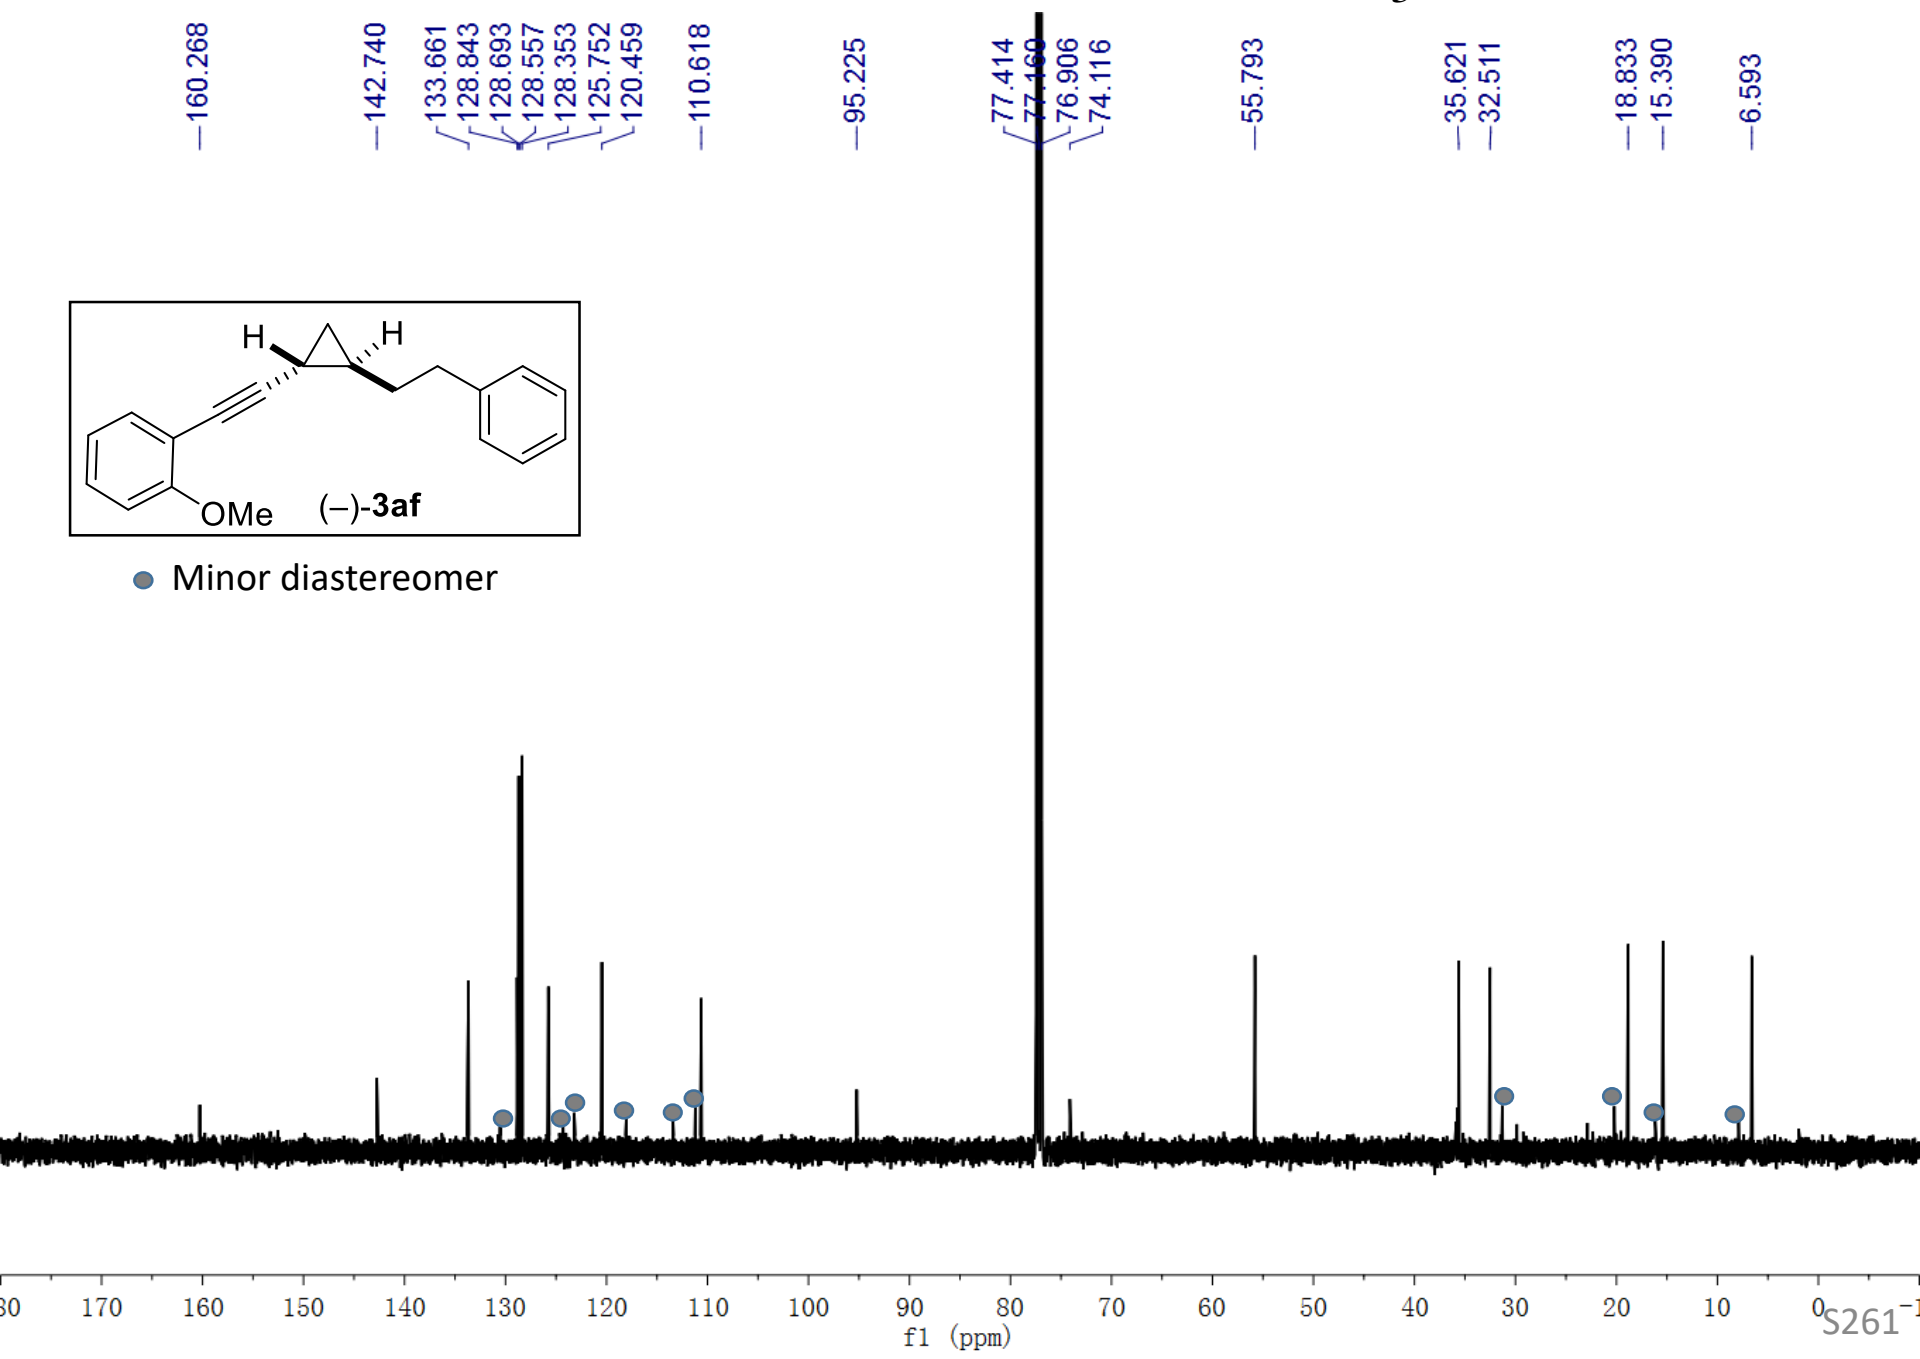

Data File : JOK-1843--IF-0.1%-1ML-3.lcd  
 Sample Name : JOK-1843--IF-0.1%-1ML-3  
 Sample ID : JOK-1843--IF-0.1%-1ML-3  
 Method File : JOK-0.1%--40min-1ml.lcm  
 Chromatogram

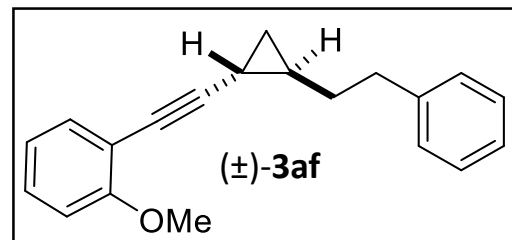

AU

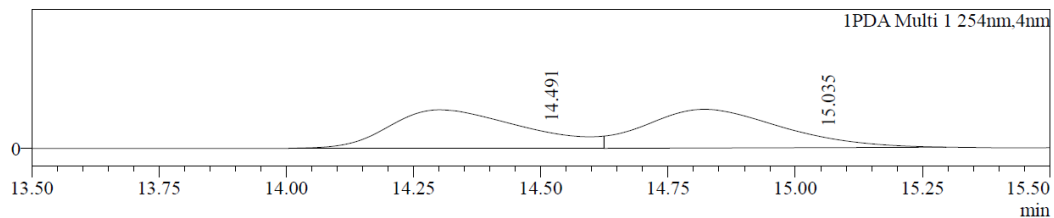

UV Spectrum  
 Retention time = 14.491

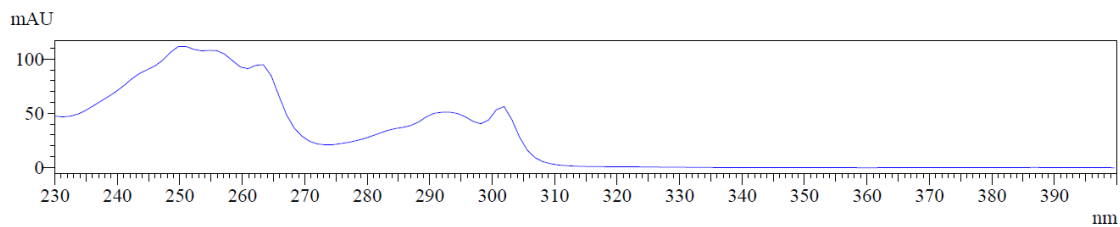

UV Spectrum  
 Retention time = 15.035

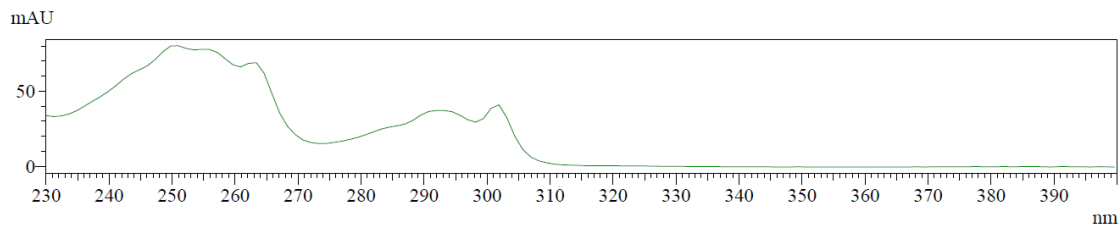

Peak Table

| Peak# | Ret. Time | Area    | Area%   |
|-------|-----------|---------|---------|
| 1     | 14.491    | 4118530 | 49.946  |
| 2     | 15.035    | 4127418 | 50.054  |
| Total |           | 8245948 | 100.000 |

Data File : J0K-1842--IF-0.1%-1ML-2.lcd  
 Sample Name : J0K-1842--IF-0.1%-1ML-2  
 Sample ID : J0K-1842--IF-0.1%-1ML-2  
 Method File : J0K-0.1%--40min-1ml.lcm

Chromatogram

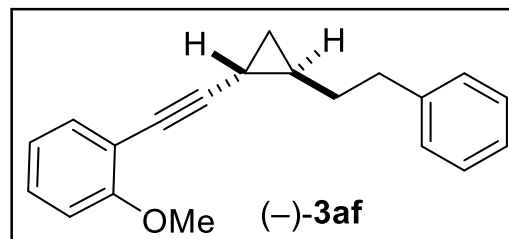

AU

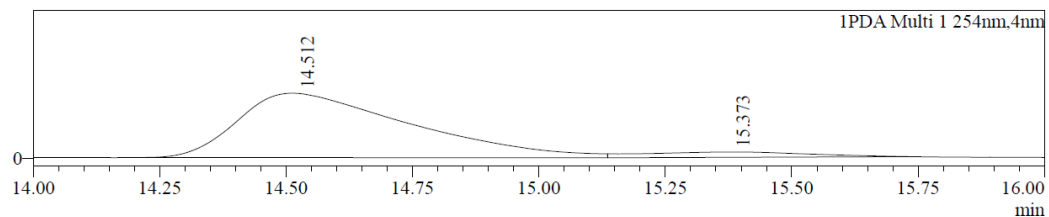

UV Spectrum

Retention time = 14.512

mAU

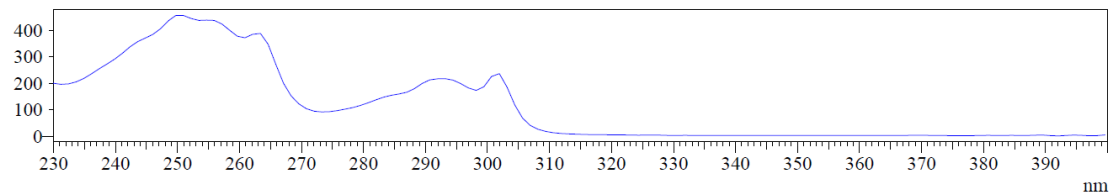

UV Spectrum

Retention time = 15.373

mAU

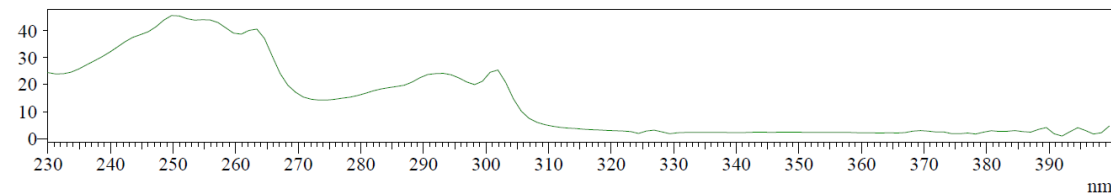

Peak Table

PDA Ch1 254nm

| Peak# | Ret. Time | Area     | Area%   |
|-------|-----------|----------|---------|
| 1     | 14.512    | 10300218 | 92.536  |
| 2     | 15.373    | 830833   | 7.464   |
| Total |           | 11131051 | 100.000 |

# $^1\text{H}$ NMR of **4f**, 600 MHz, $\text{CDCl}_3$

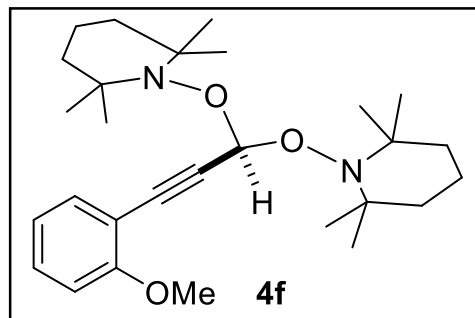

7.409  
7.406  
7.396  
7.394  
7.273  
7.270  
7.260  
7.247  
7.244  
6.904  
6.893  
6.891  
6.880  
6.863  
6.849  
5.997

3.841

1.508  
1.500  
1.490  
1.369  
1.299  
1.254  
1.148  
1.137

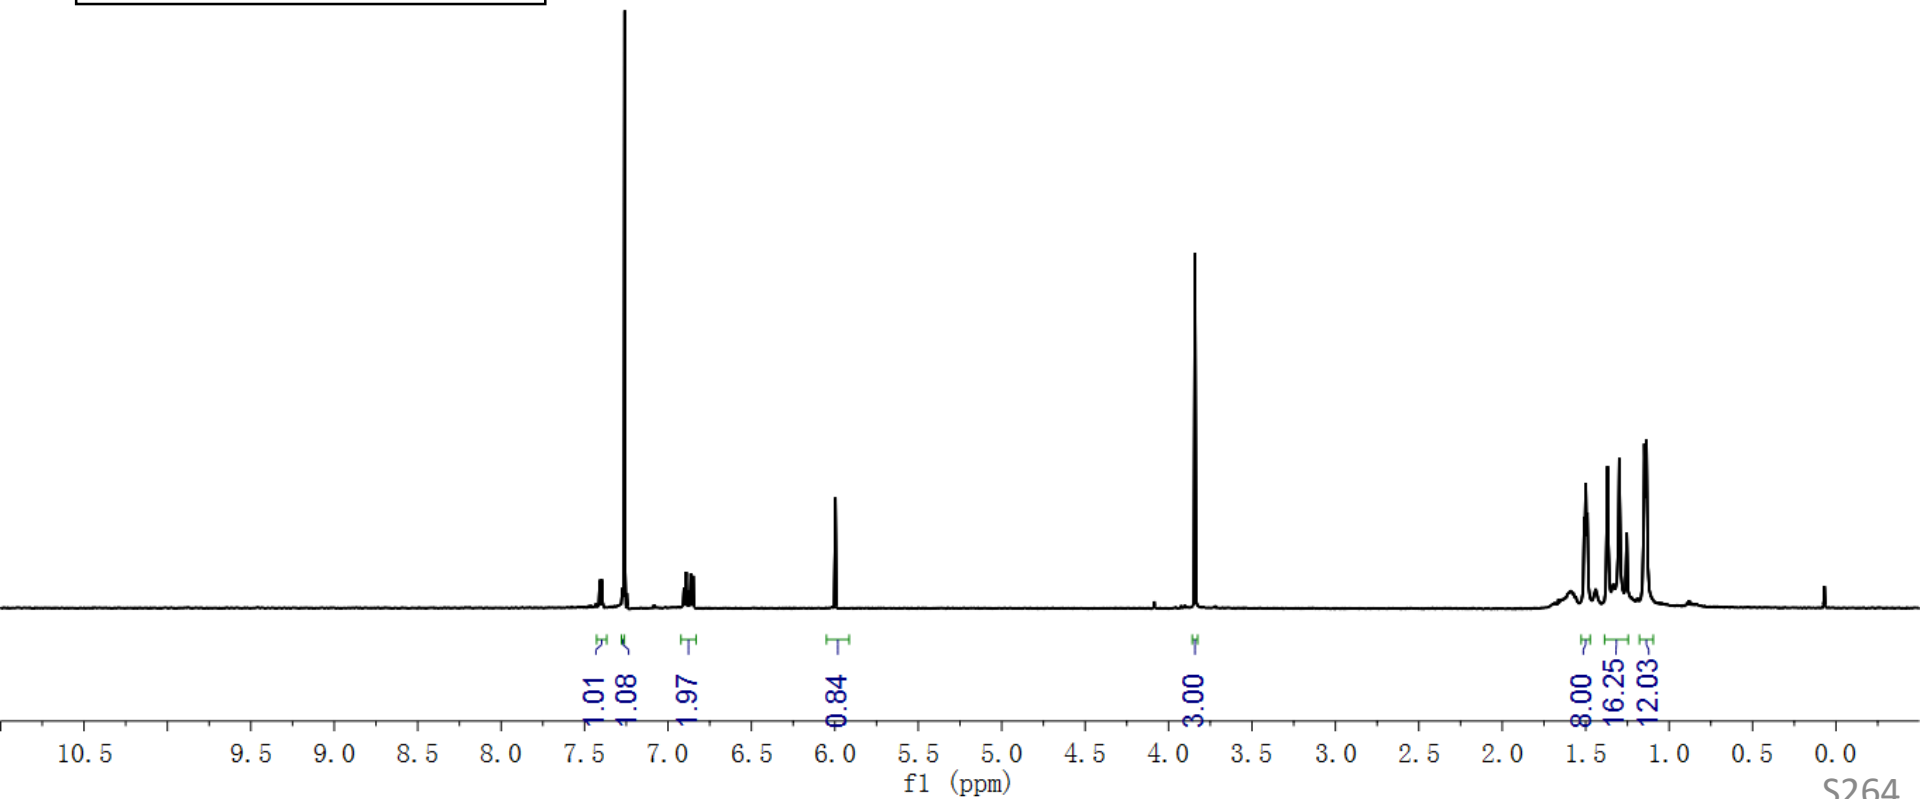



$^{13}\text{C}$  NMR of **4f**, 151 MHz,  $\text{CDCl}_3$



132.147  
131.982  
128.517  
—118.702  
—111.569  
—106.142  
—91.613  
—87.419  
77.372  
77.168  
76.948  
—60.115  
40.349  
40.248  
33.412  
33.346  
—20.905  
—17.380

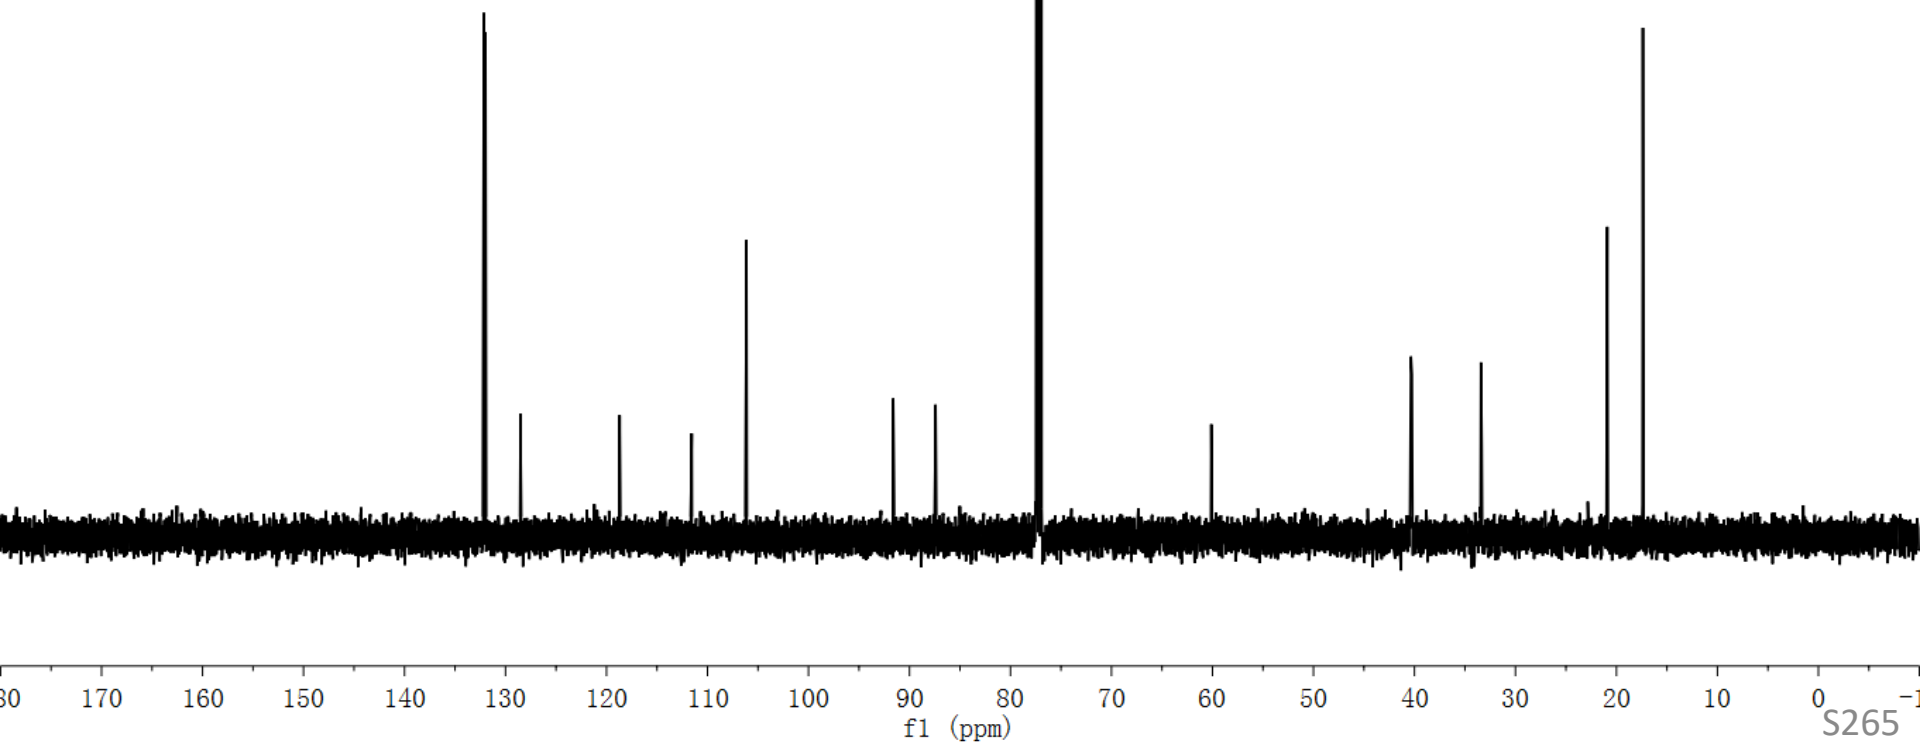

$^1\text{H}$  NMR of **4g**, 500 MHz,  $\text{CDCl}_3$

7.613  
7.610  
7.600  
7.596  
7.515  
7.511  
7.498

-5.977

1.501  
1.495  
1.474  
1.461  
1.438  
1.344  
1.310  
1.274  
1.254  
1.139

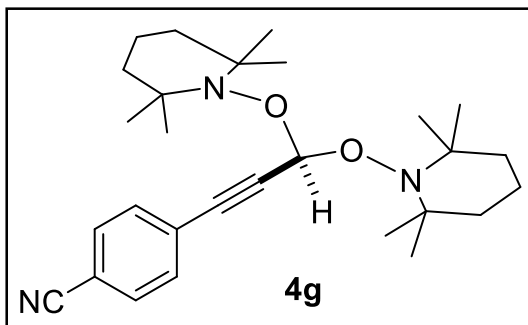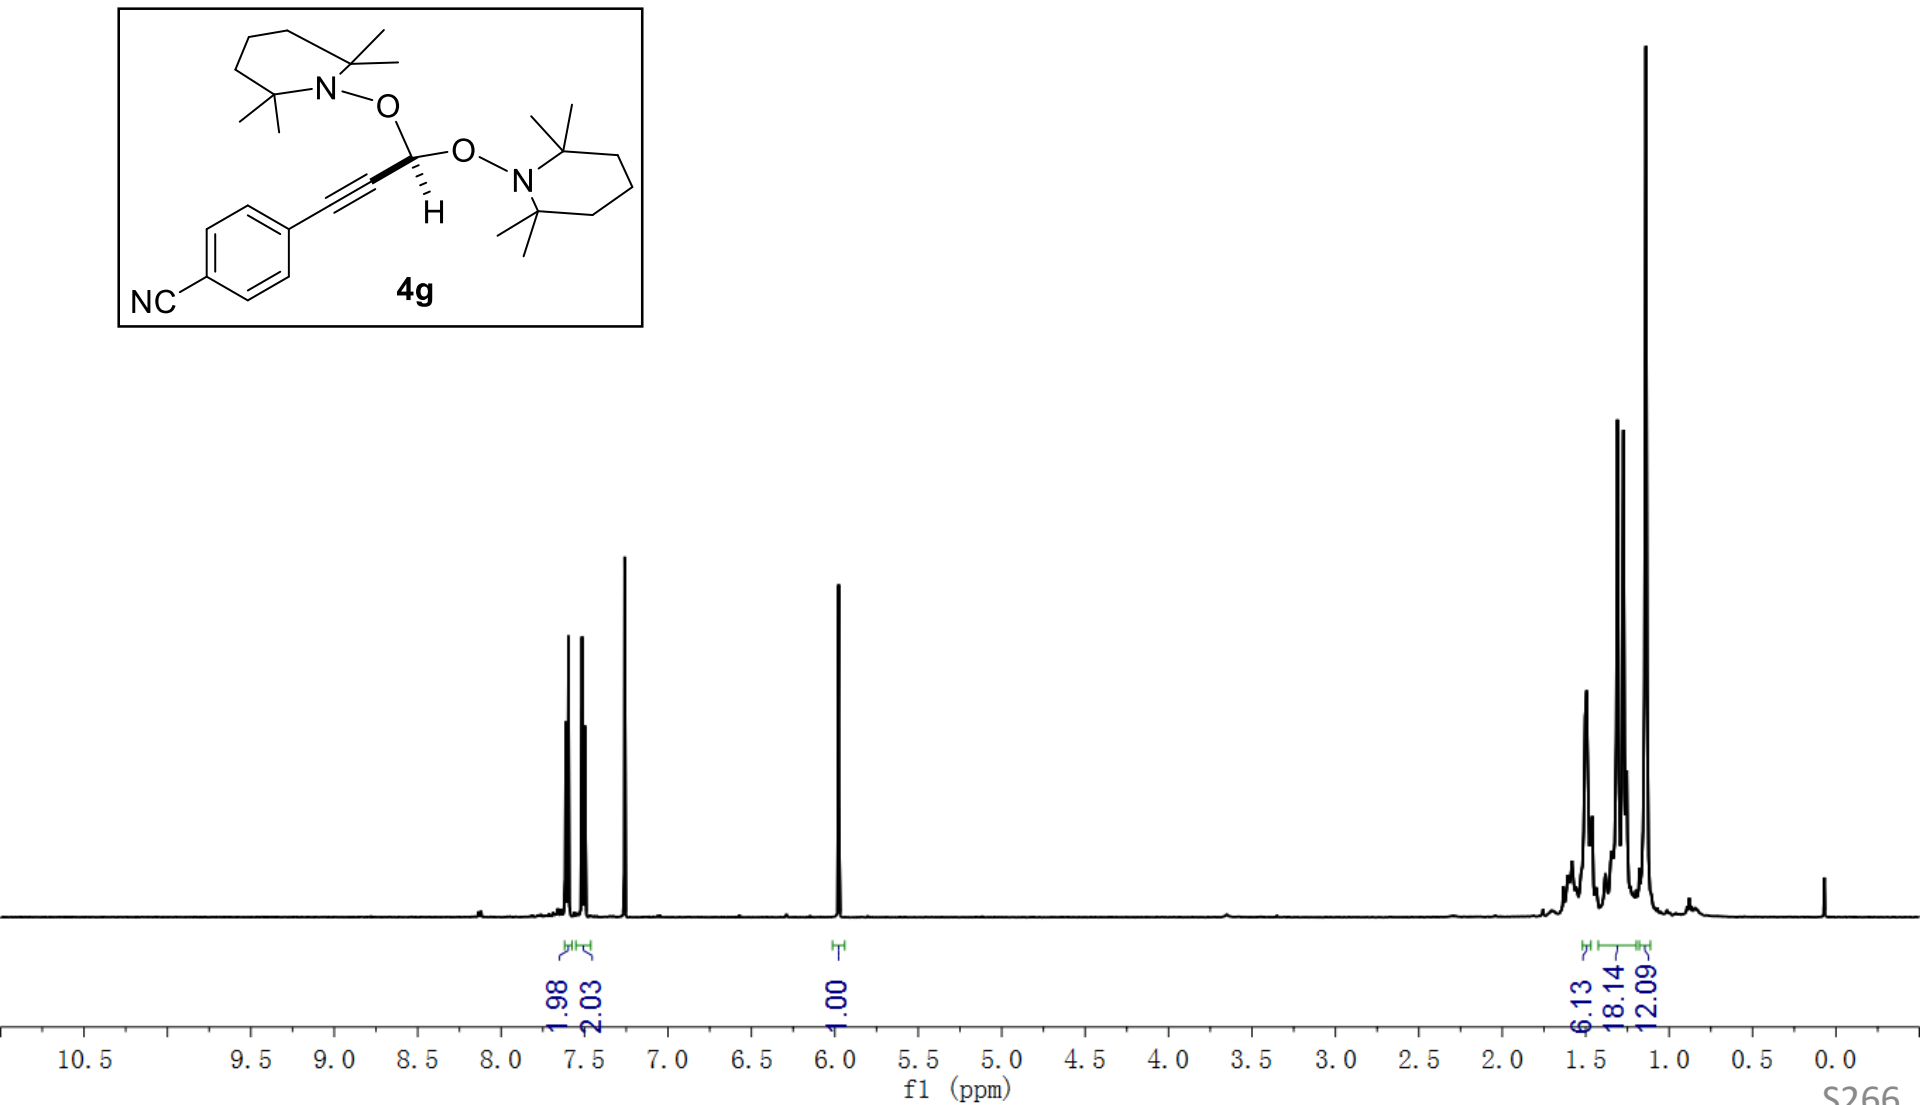

$^{13}\text{C}$  NMR of **4g**, 126 MHz,  $\text{CDCl}_3$

132.156  
131.992  
128.533  
— 118.703  
— 111.592  
— 106.164  
— 91.636  
— 87.440  
{ 77.414  
77.169  
76.905  
— 60.120  
— 40.369  
40.276  
{ 33.422  
33.358  
— 20.920  
— 17.395

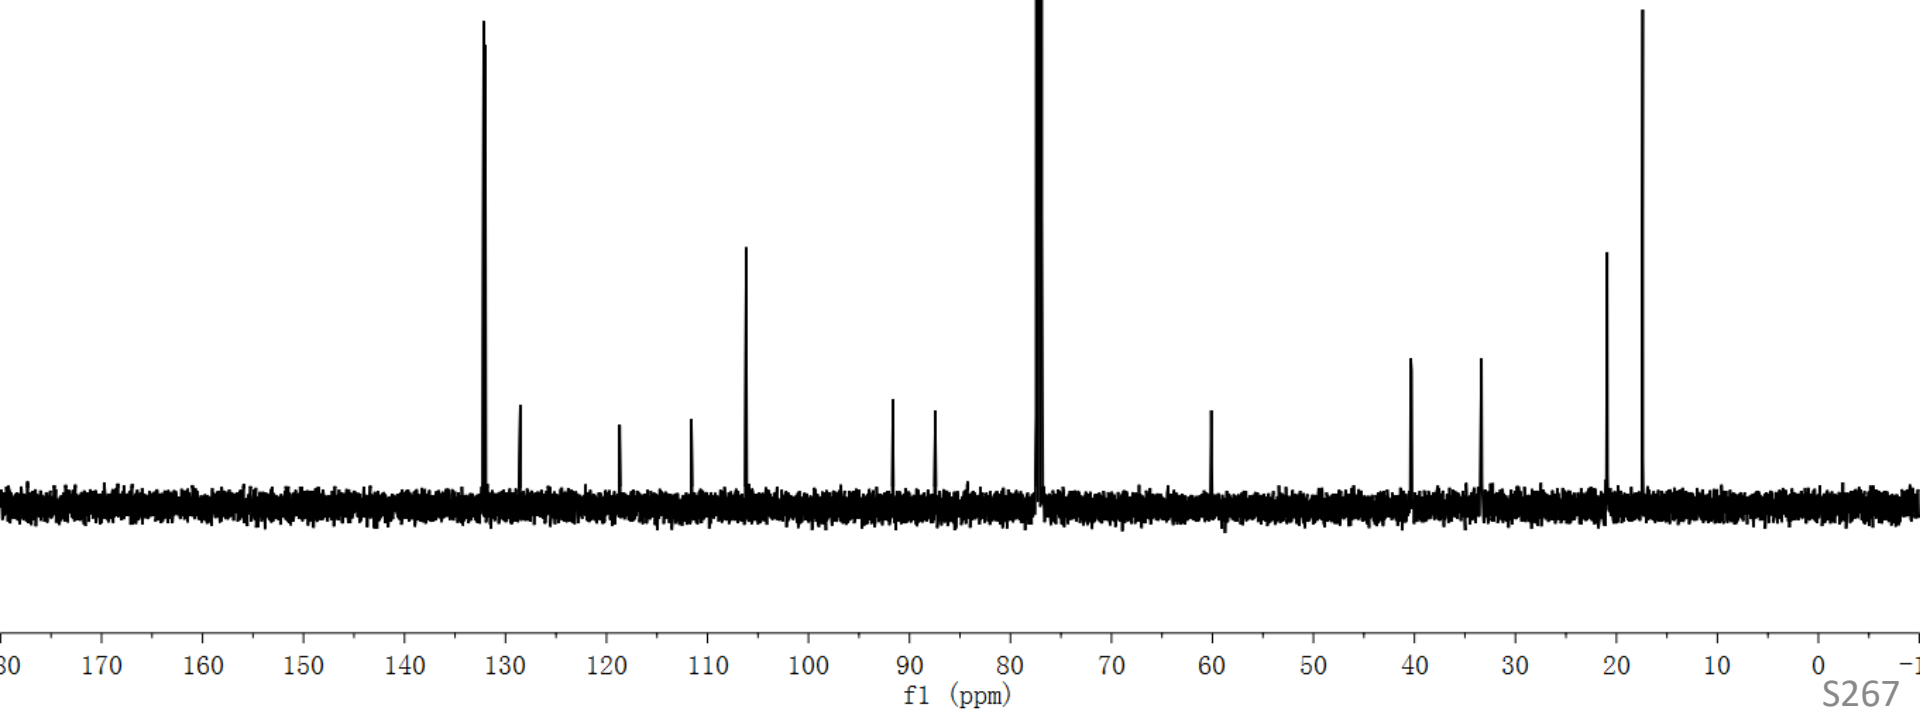

# $^1\text{H}$ NMR of **5f**, 500 MHz, $\text{CDCl}_3$

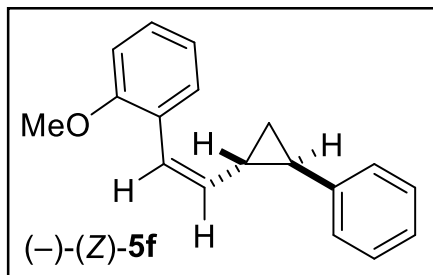

● Minor diastereomer

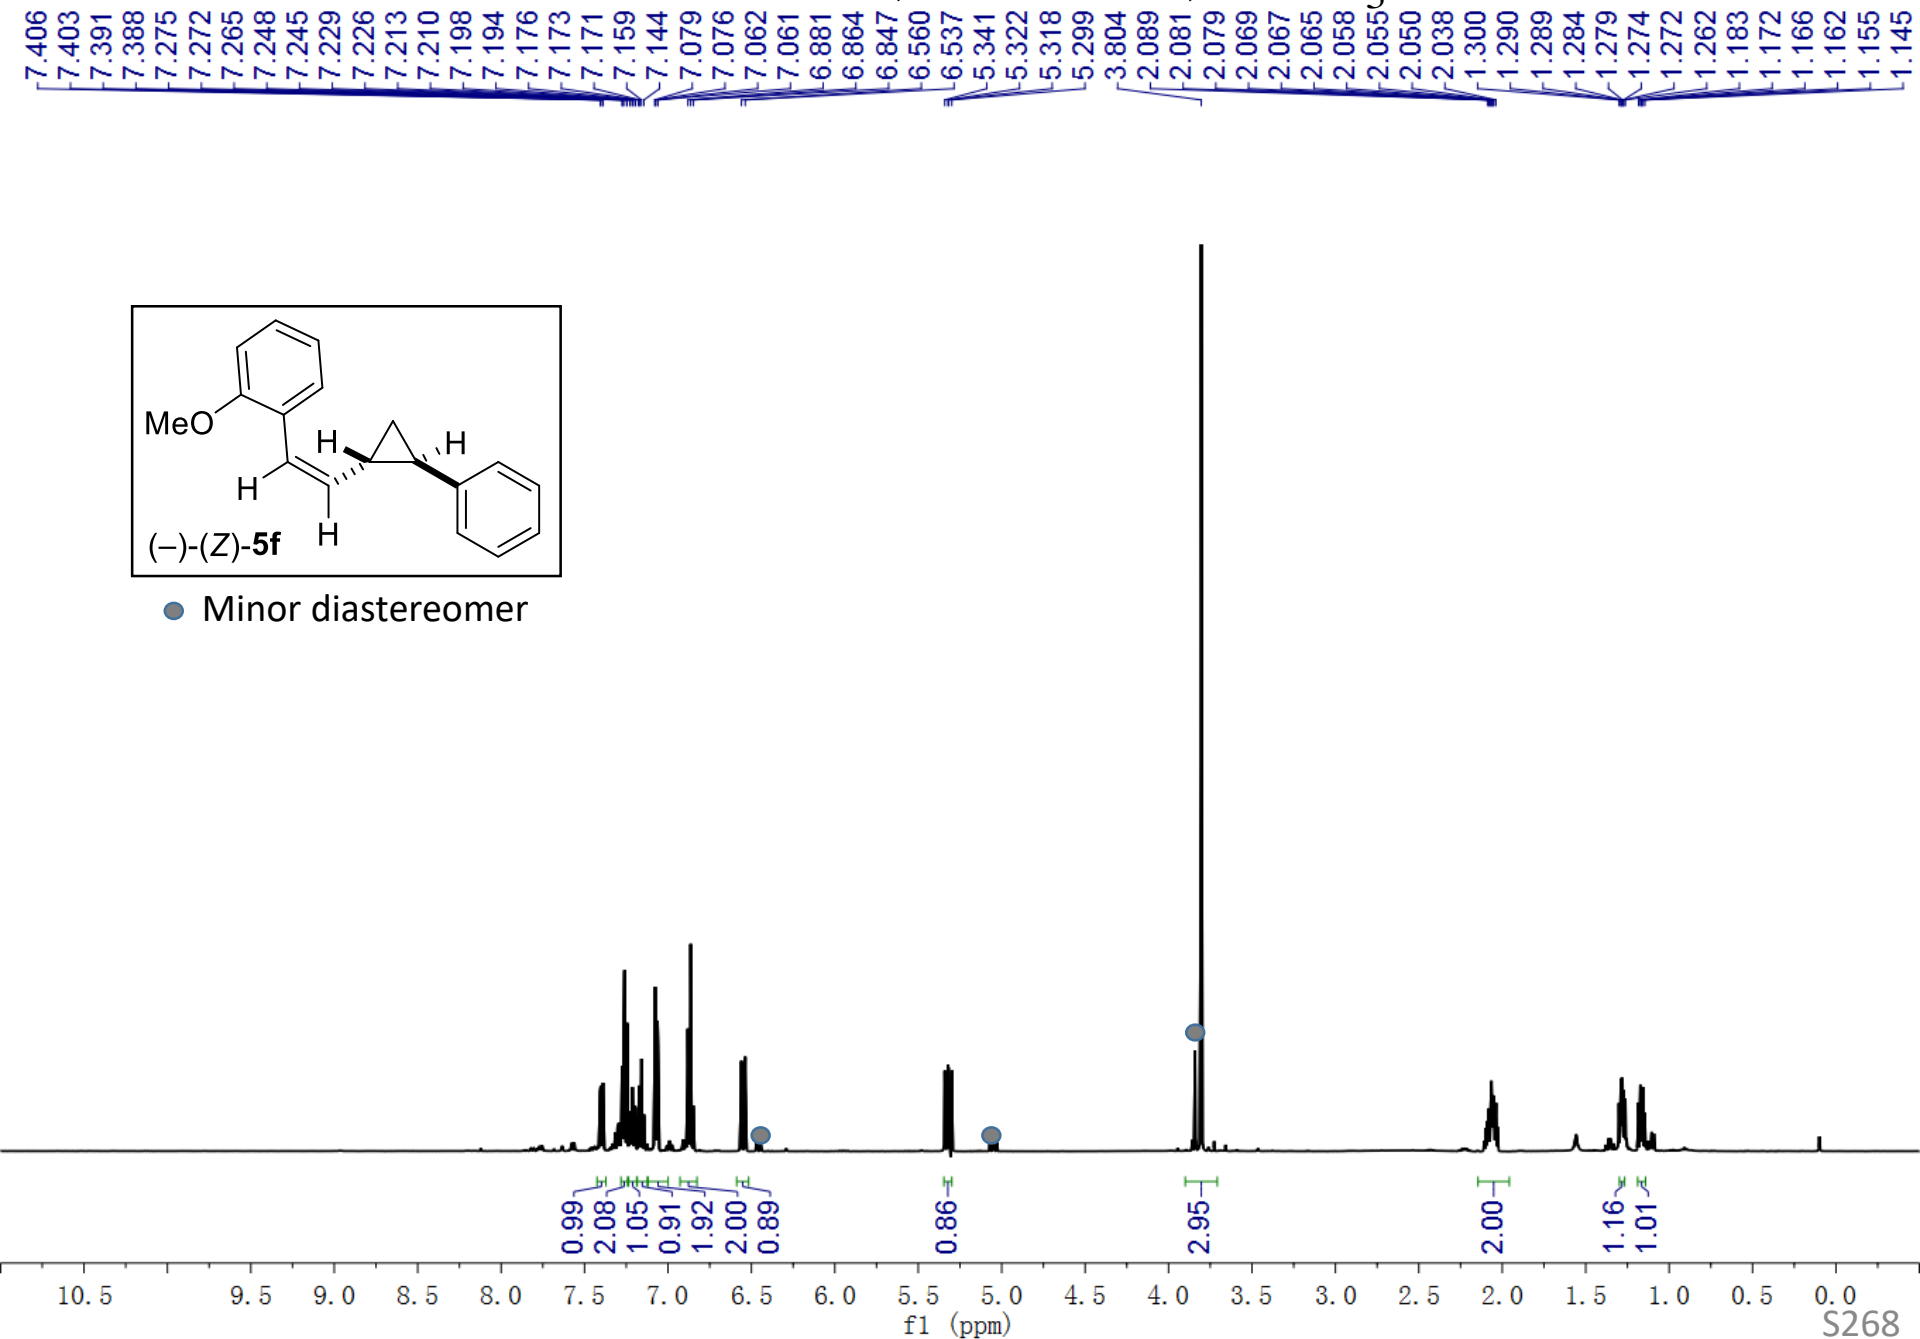

$^{13}\text{C}$  NMR of **5f**, 126 MHz,  $\text{CDCl}_3$

157.047

142.175

134.945

130.188

128.431

128.143

125.876

125.696

123.432

120.492

77.414

77.160

76.906

55.489

26.141

24.194

18.171

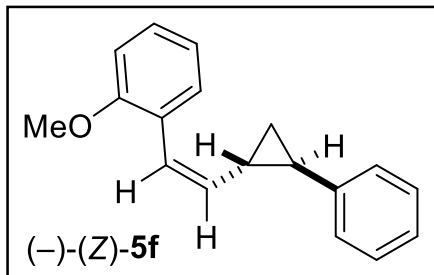

● Minor diastereomer

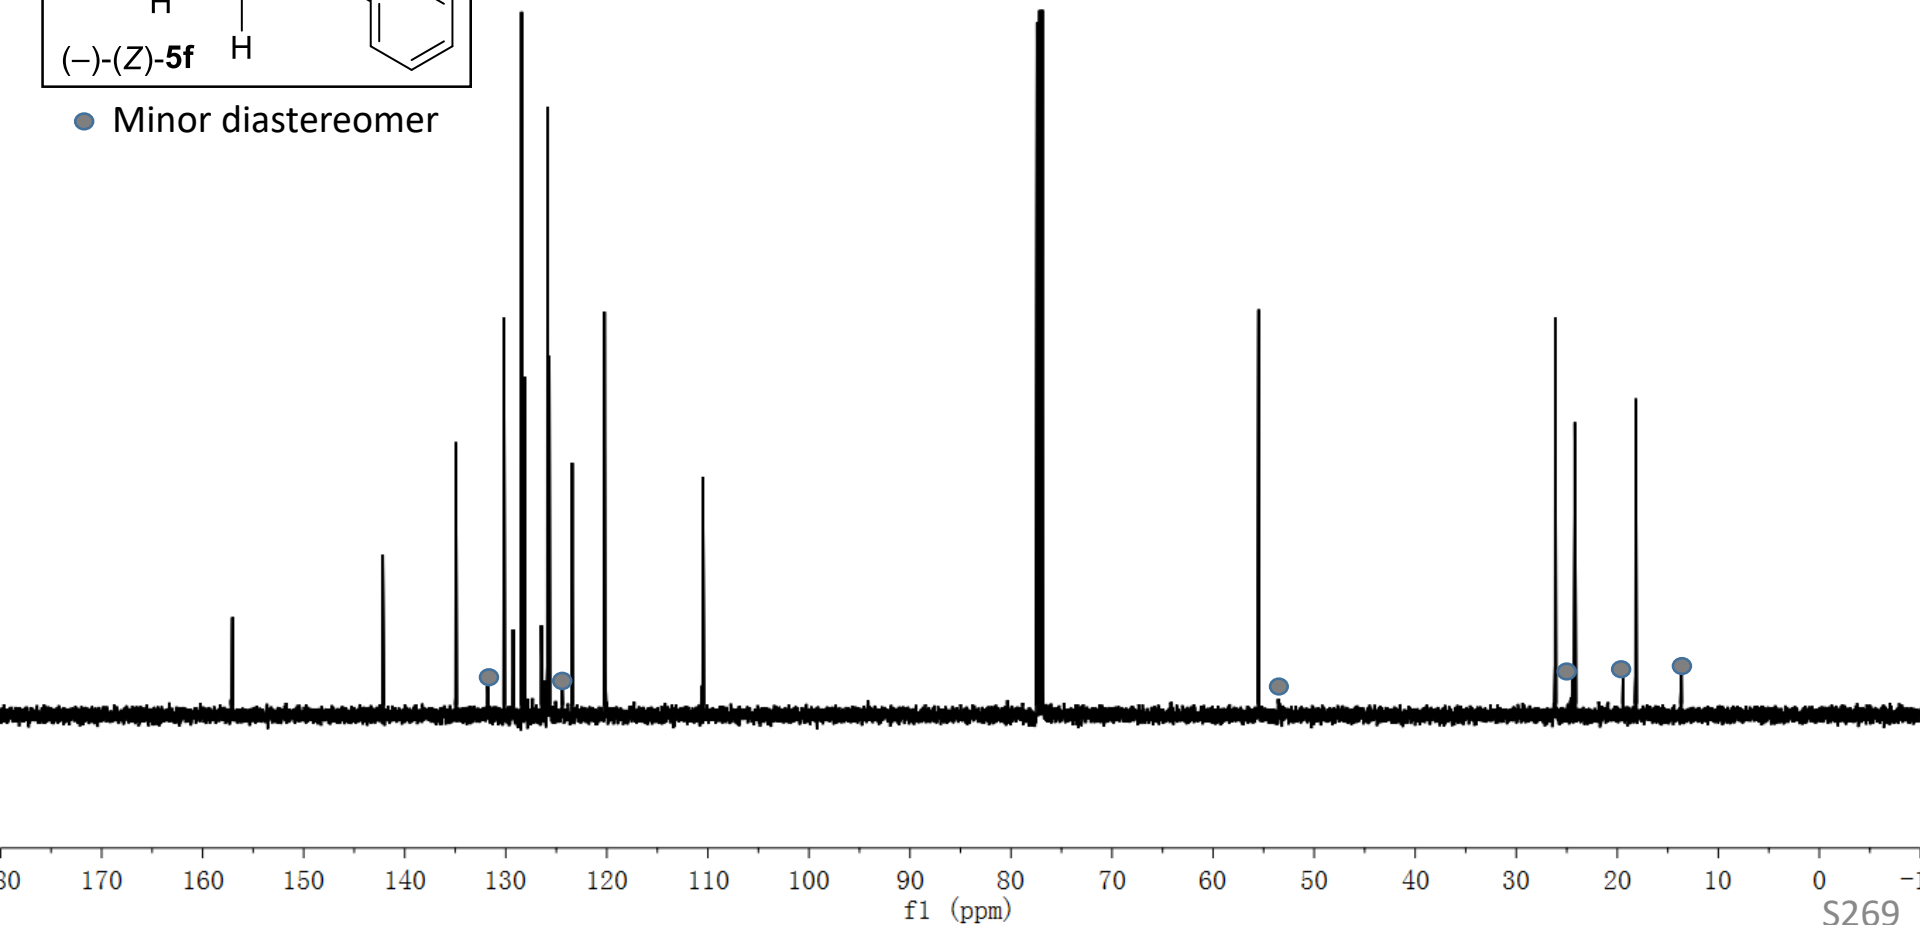

Data File : JOK-1000-IB-0%-1ML.lcd  
 Sample Name : JOK-1000-IB-0%-1ML  
 Sample ID : JOK-1000-IB-0%-1ML  
 Method File : JOK-0%-45min-1ml.lcm

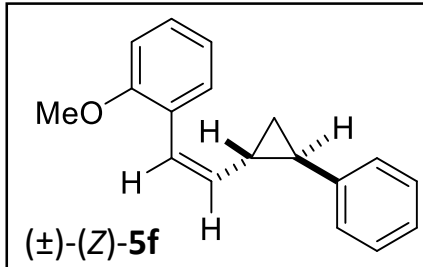

Chromatogram

mAU

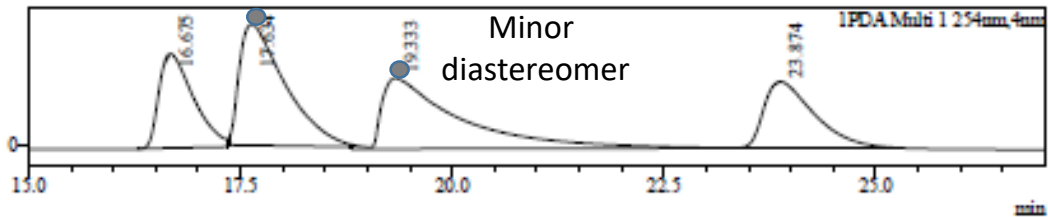

UV Spectrum  
 Retention time = 16.675

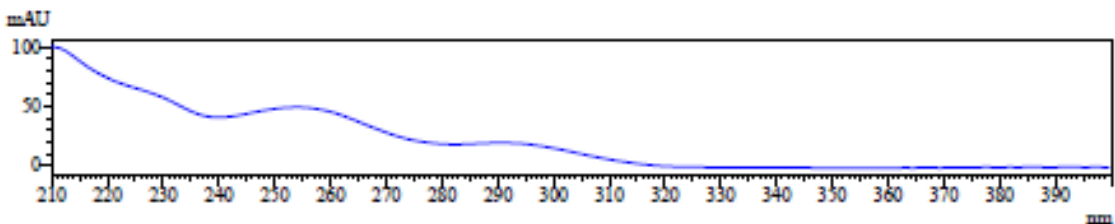

UV Spectrum  
 Retention time = 23.874

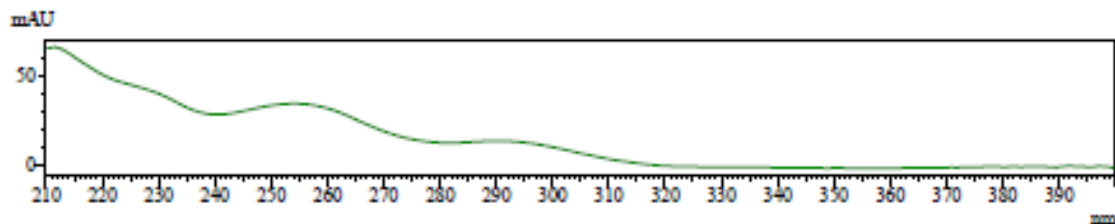

Peak Table

PDA Ch1 254nm

| Peak# | Ret. Time | Area    | Area%   |
|-------|-----------|---------|---------|
| 1     | 16.675    | 1401565 | 18.515  |
| 2     | 17.634    | 2380278 | 31.444  |
| 3     | 19.333    | 2366946 | 31.268  |
| 4     | 23.874    | 1421163 | 18.774  |
| Total |           | 7569951 | 100.000 |

Data File : JOK-1003-IB-0%-1ML-6.lcd  
 Sample Name : JOK-1003-IB-0%-1ML-5  
 Sample ID : JOK-1003-IB-0%-1ML-5  
 Method File : JOK-0%-45min-1ml.lcm

Chromatogram

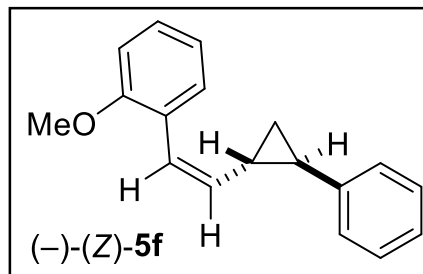

mAU

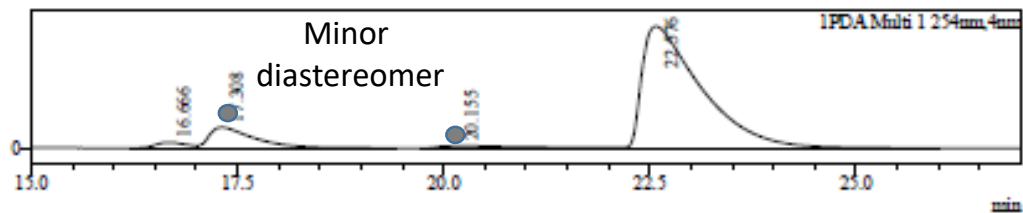

UV Spectrum  
 Retention time = 16.666

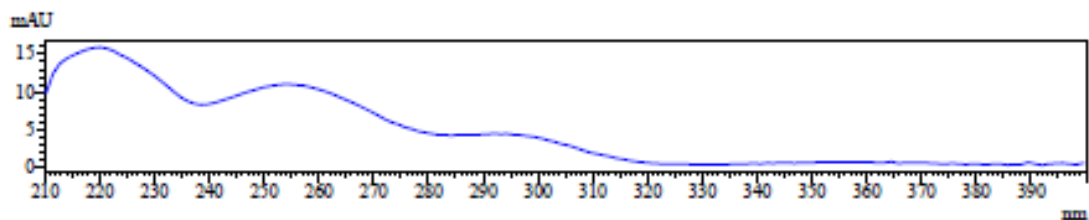

UV Spectrum  
 Retention time = 22.576

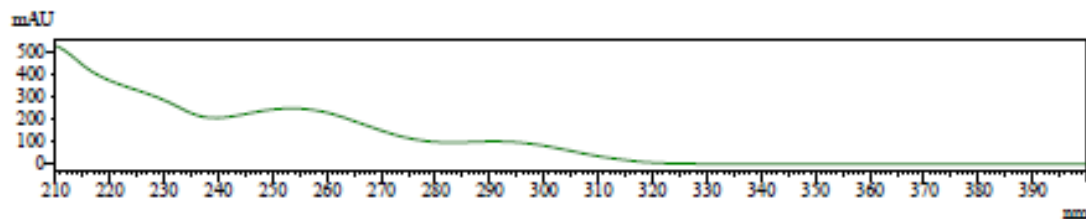

Peak Table

| Peak# | Ret. Time | Area     | Area%   |
|-------|-----------|----------|---------|
| 1     | 16.666    | 288690   | 1.983   |
| 2     | 17.308    | 1599163  | 10.982  |
| 3     | 20.155    | 311844   | 2.142   |
| 4     | 22.576    | 12362128 | 84.894  |
| Total |           | 14561825 | 100.000 |

# $^1\text{H}$ NMR of **6f**, 500 MHz, $\text{CDCl}_3$

7.349  
7.345  
7.332  
7.330  
7.319  
7.304  
7.288  
7.020  
7.016  
7.004  
7.001  
6.911  
6.909  
6.896  
6.894  
6.881  
6.879  
6.873  
6.856  
6.787  
6.781  
6.779  
6.773  
6.772  
6.764  
6.762  
6.758

3.777

2.200  
2.186  
2.183  
2.169  
1.572  
1.555  
1.550  
1.540  
1.513  
1.503  
1.500  
1.490  
1.292  
1.282  
1.275  
1.265

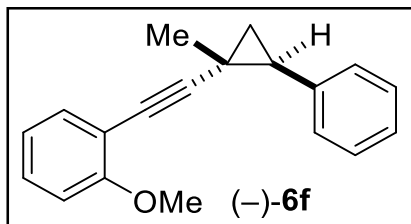

● Minor diastereomer

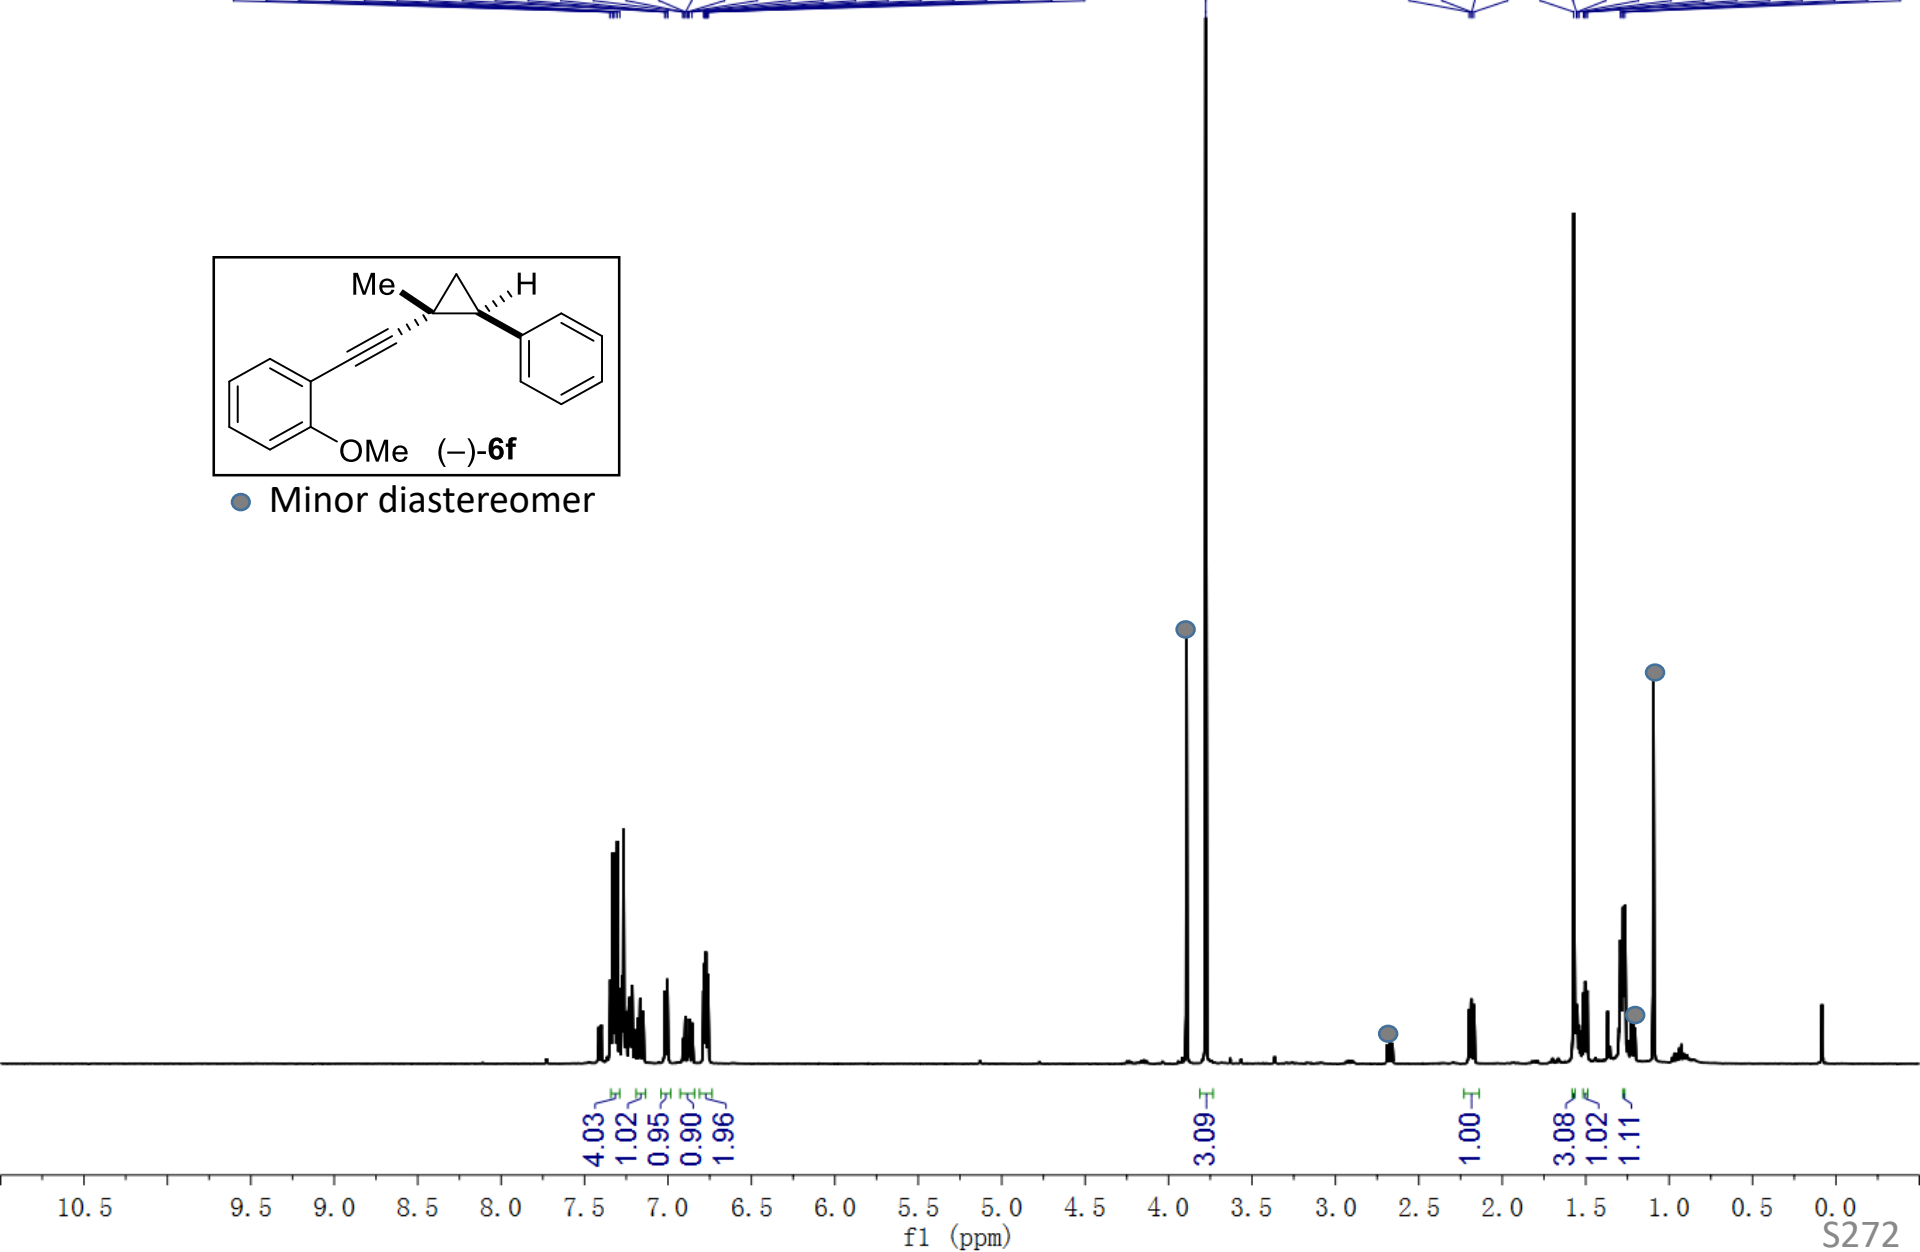



# $^{13}\text{C}$ NMR of **6f**, 126 MHz, $\text{CDCl}_3$

—159.970

—138.968

—133.723

—129.389

—128.363

—127.805

—126.072

—120.354

—113.233

—110.691

—96.881

—77.414

—77.160

—76.906

—76.423

—55.842

—32.791

—25.736

—23.292

—17.968

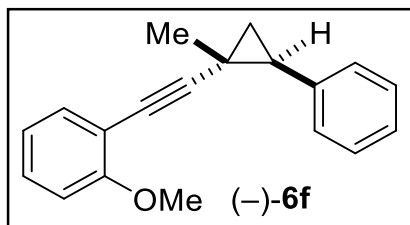

● Minor diastereomer

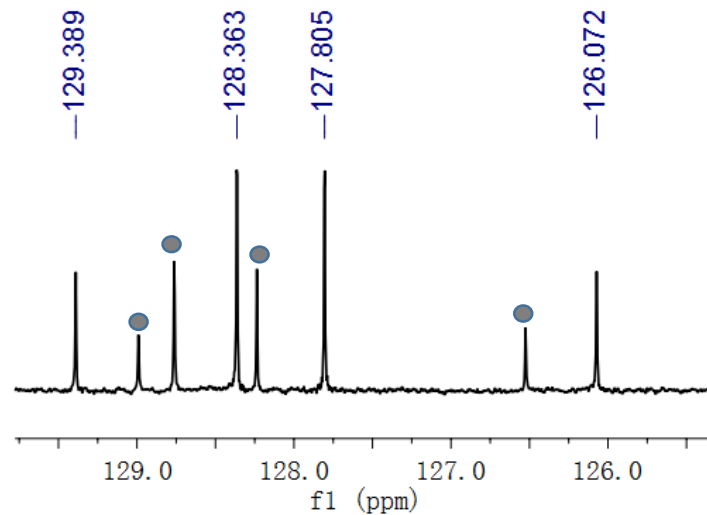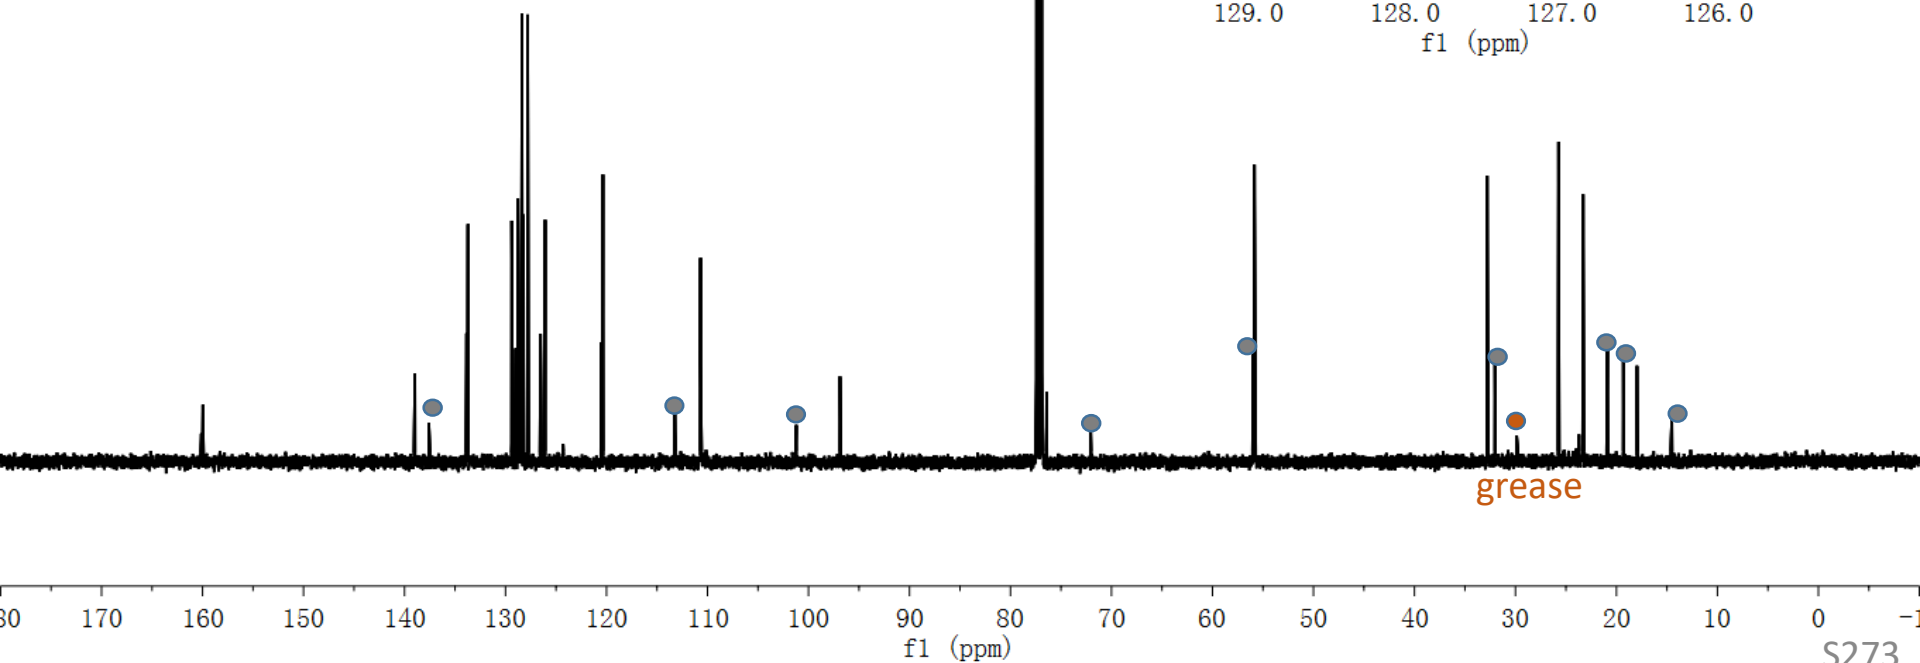

grease

Data File : J0K-1538-ODH-0.3%-1ML.lcd  
 Sample Name : J0K-1538-ODH-0.3%-1ML  
 Sample ID : J0K-1538-ODH-0.3%-1ML  
 Method File : J0K-0.3%-45min-1ml.lcm

Chromatogram

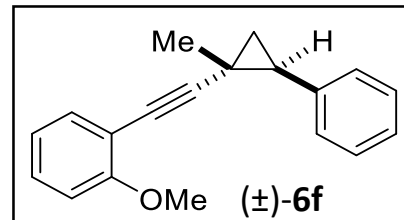

mAU

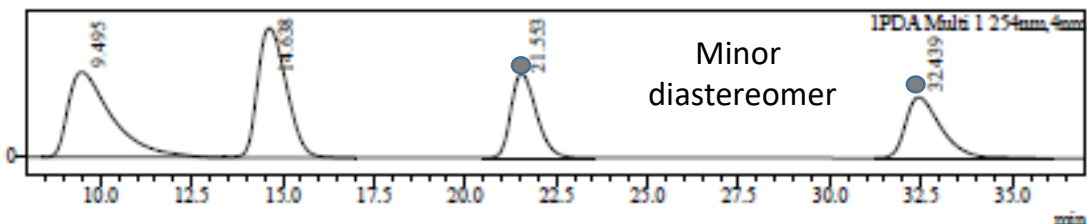

UV Spectrum  
 Retention time = 9.495

mAU

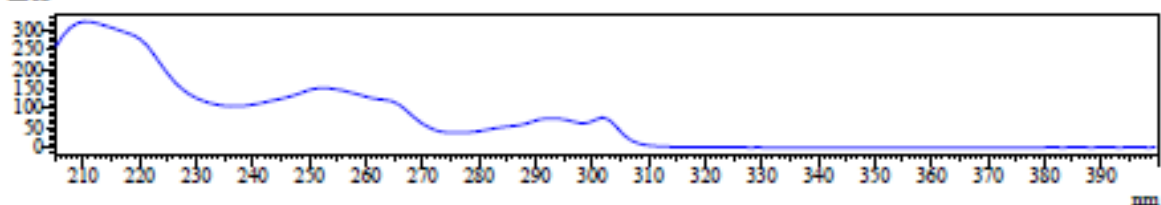

UV Spectrum  
 Retention time = 14.638

mAU

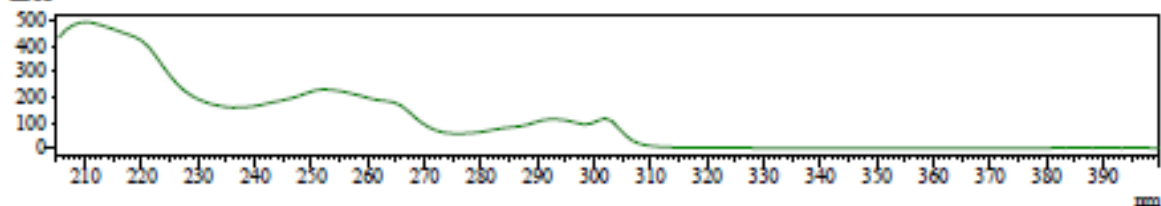

Peak Table

PDA Ch1 254nm

| Peak# | Ret. Time | Area     | Area%   |
|-------|-----------|----------|---------|
| 1     | 9.495     | 12369764 | 31.724  |
| 2     | 14.638    | 12353166 | 31.682  |
| 3     | 21.553    | 7090460  | 18.185  |
| 4     | 32.439    | 7178261  | 18.410  |
| Total |           | 38991652 | 100.000 |

Data File : JOK-1539-ODH-0.3%-1ML.lcd  
 Sample Name : JOK-1539-ODH-0.3%-1ML  
 Sample ID : JOK-1539-ODH-0.3%-1ML  
 Method File : JOK-0.3%-45min-1ml.lcm

Chromatogram

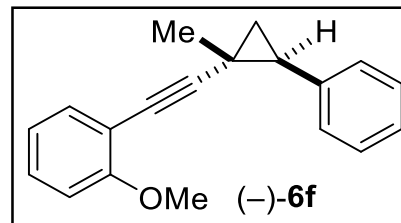

mAU

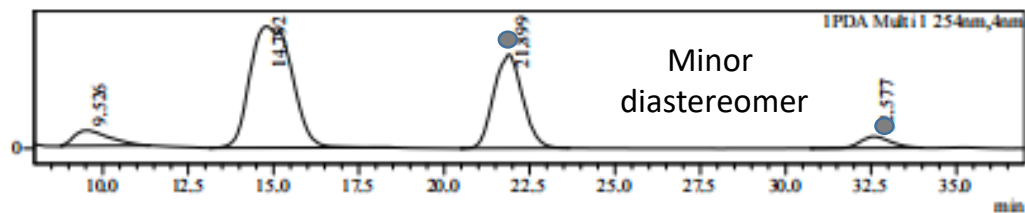

UV Spectrum

Retention time = 9.526

mAU

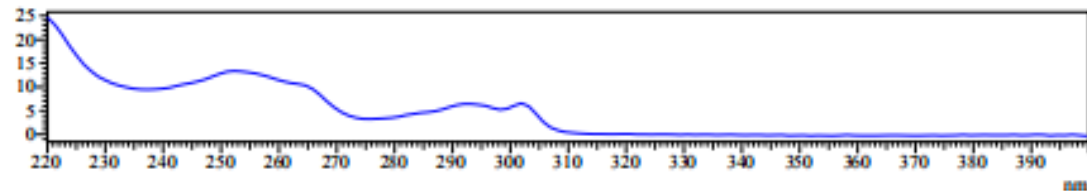

UV Spectrum

Retention time = 14.792

mAU

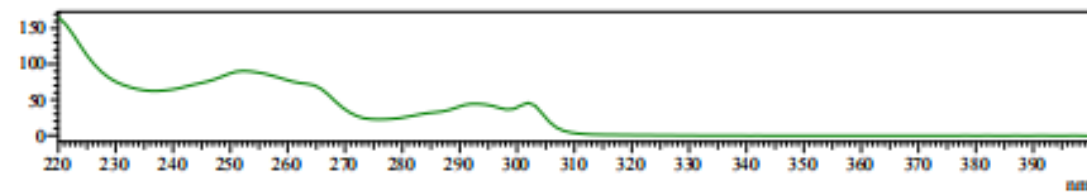

Peak Table

PDA Ch1 254nm

| Peak# | Ret. Time | Area     | Area%   |
|-------|-----------|----------|---------|
| 1     | 9.526     | 793506   | 6.221   |
| 2     | 14.792    | 7495637  | 58.764  |
| 3     | 21.899    | 3969097  | 31.117  |
| 4     | 32.577    | 497335   | 3.899   |
| Total |           | 12755575 | 100.000 |

# $^1\text{H}$ NMR of **7f**, 600 MHz, $\text{CDCl}_3$

7.494, 7.479, 7.385, 7.370, 7.355, 7.323, 7.315, 7.305, 7.290, 7.267, 7.260, 7.251, 7.242, 7.234, 7.225, 7.216, 7.189, 7.173, 7.158, 6.990, 6.987, 6.974, 6.794, 6.782, 6.781, 6.766, -3.775, -3.053, 2.402, 2.388, 2.371, 1.586, 1.575, 1.563, 1.482, 1.472, 1.465, 1.455

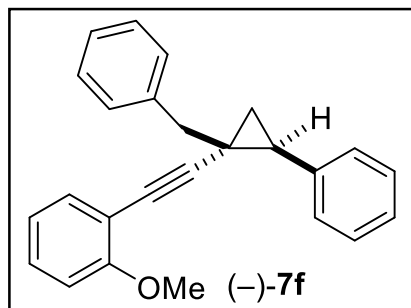

● Minor diastereomer

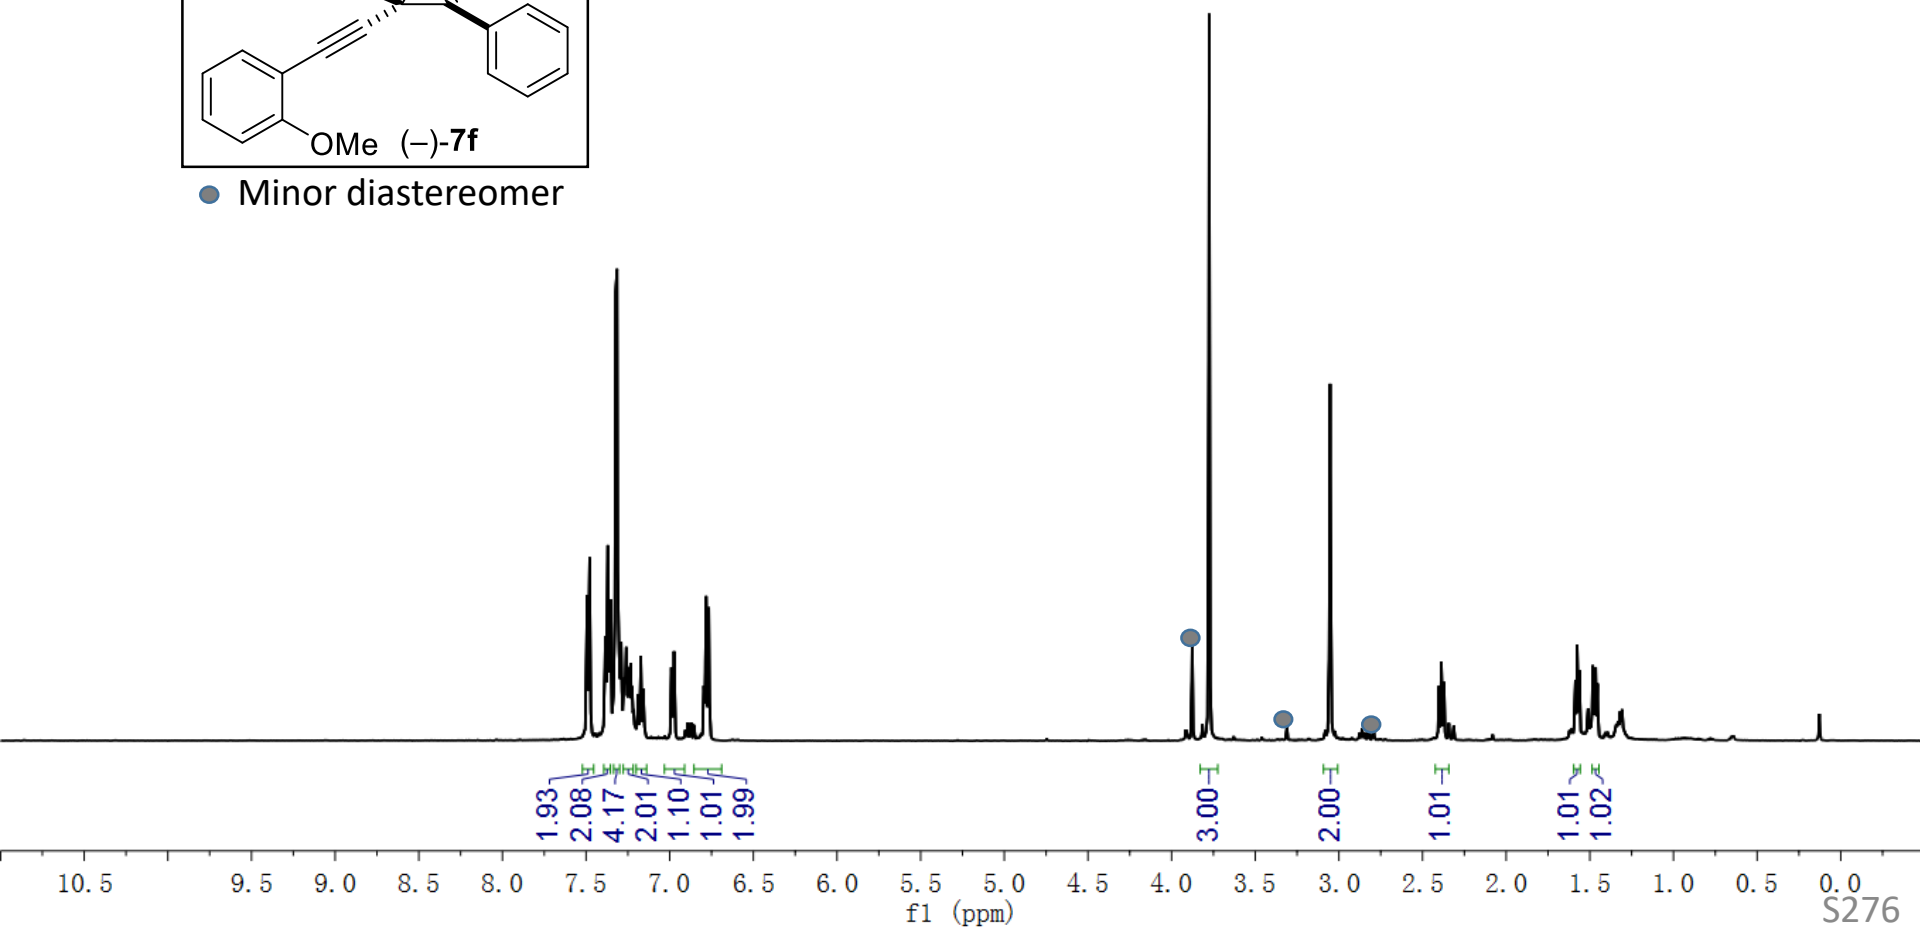

$^{13}\text{C}$  NMR of **7f**, 151 MHz,  $\text{CDCl}_3$

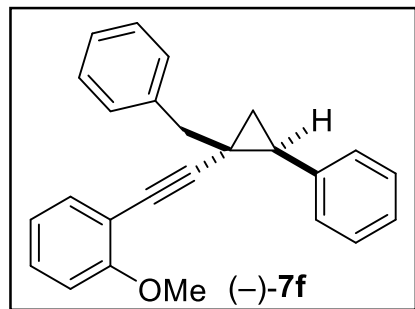

● Minor diastereomer

160.050  
139.318  
138.543  
133.414  
129.591  
128.690  
128.474  
128.220  
127.787  
126.509  
126.148  
120.280  
113.295  
110.731  
95.687  
78.256  
77.371  
77.160  
76.947  
55.760  
44.761  
31.535  
23.839  
21.720

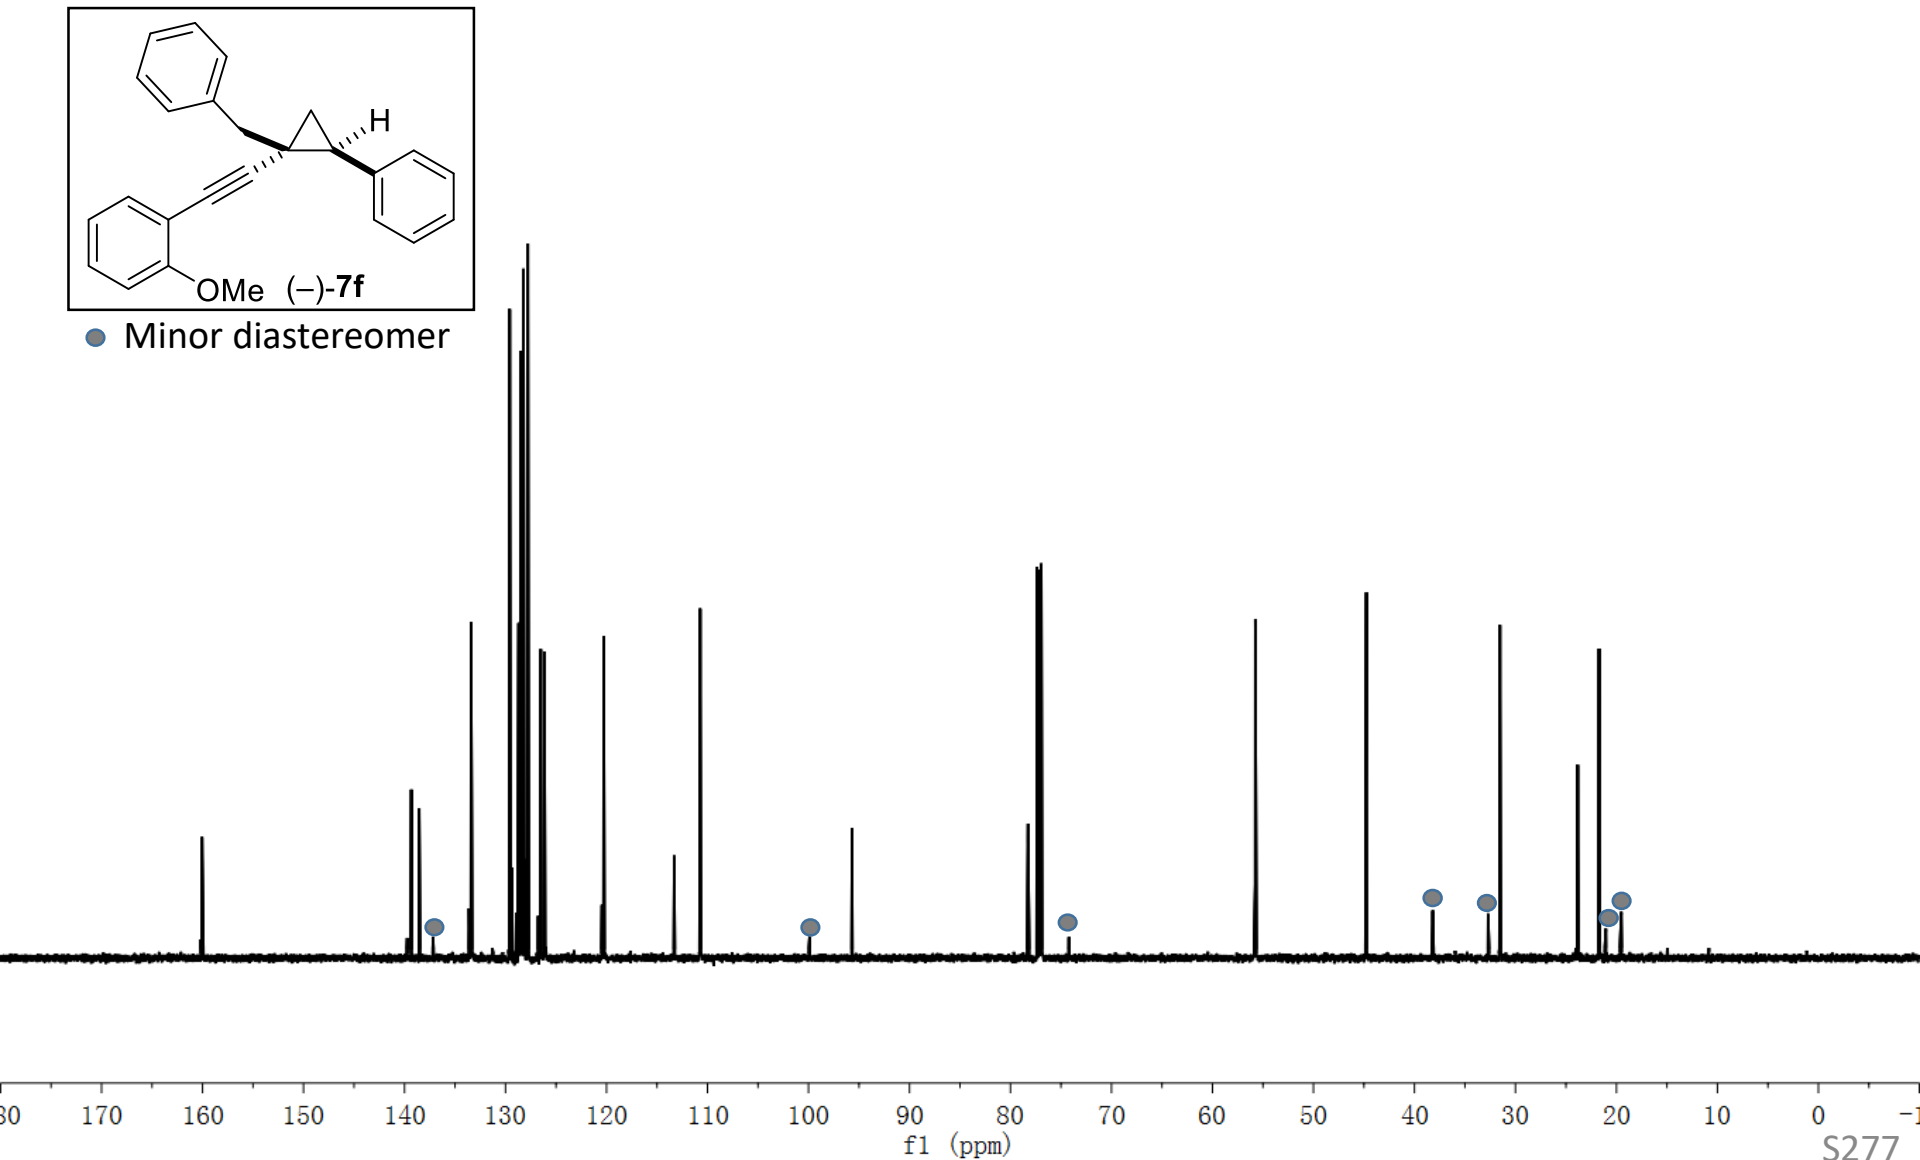

Data File : JOK-1476-1A-NEW--0.5%-0.5ML.kd  
 Sample Name : JOK-1476-1A-NEW--0.5%-0.5ML  
 Sample ID : JOK-1476-1A-NEW--0.5%-0.5ML  
 Method File : JOK-0.5%--35min-0.5ml.1cm  
 Chromatogram

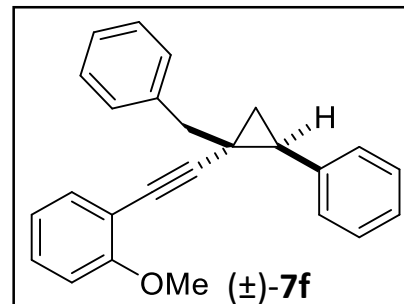

AU

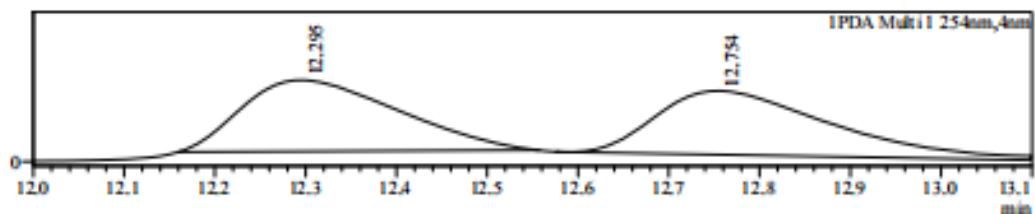

UV Spectrum  
 Retention time = 12.295

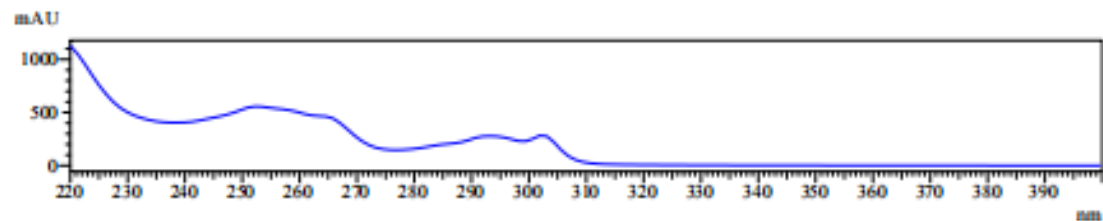

UV Spectrum  
 Retention time = 12.754

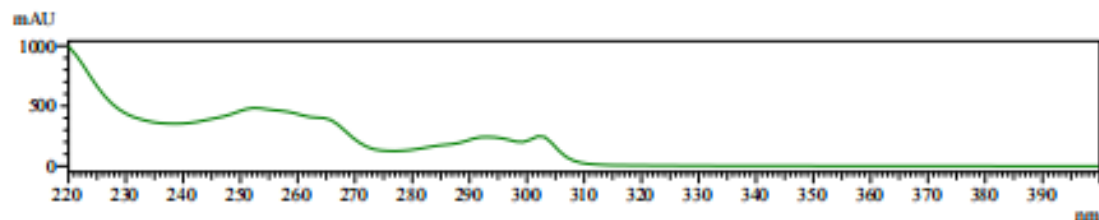

Peak Table

PDA Ch1 254nm

| Peak# | Ret. Time | Area     | Area%   |
|-------|-----------|----------|---------|
| 1     | 12.295    | 5702969  | 50.172  |
| 2     | 12.754    | 5663776  | 49.828  |
| Total |           | 11366745 | 100.000 |

Data File : J0K-1462-IA-0.5%-0.5ML.lcd  
 Sample Name : J0K-1462-IA-0.5%-0.5ML  
 Sample ID : J0K-1462-IA-0.5%-0.5ML  
 Method File : J0K-0.5%-35min-0.5ml.lcm

Chromatogram

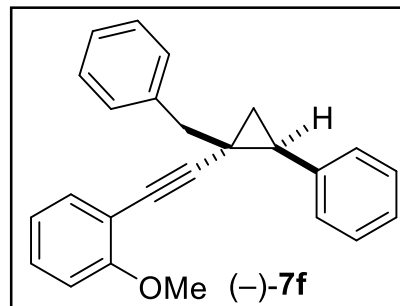

AU

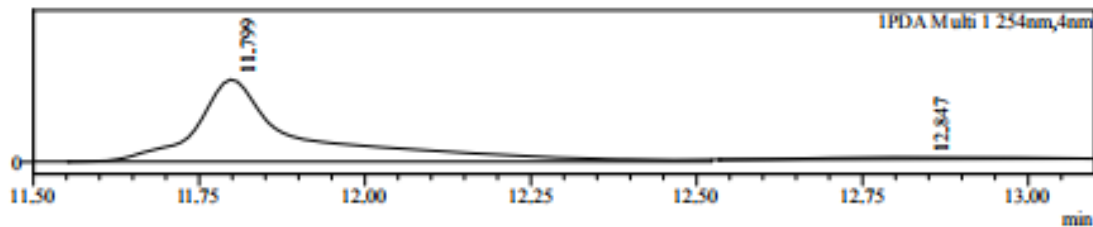

UV Spectrum  
 Retention time = 11.799

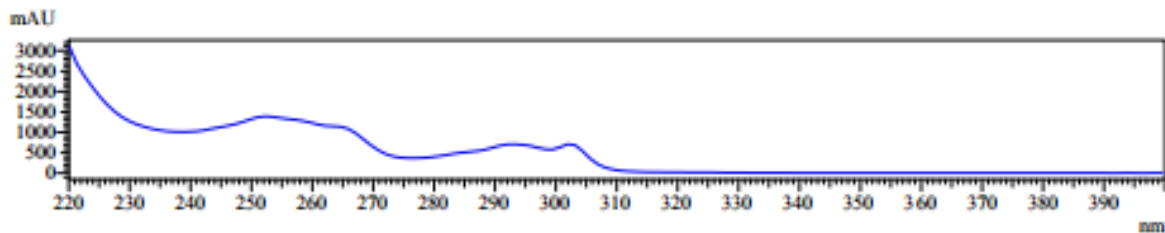

U  
 Retention time = 12.847

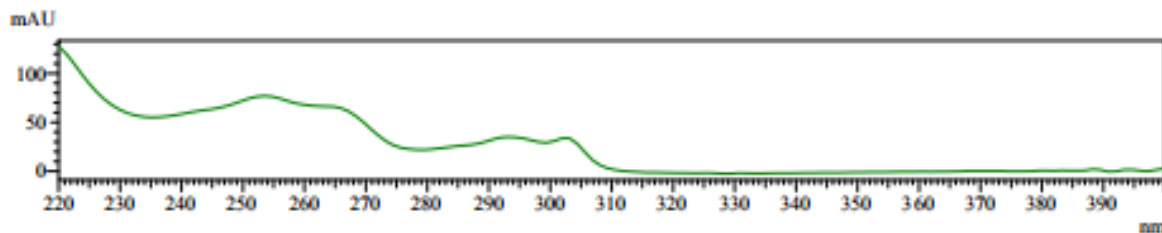

Peak Table

PDA Ch1 254nm

| Peak# | Ret. Time | Area     | Area%   |
|-------|-----------|----------|---------|
| 1     | 11.799    | 14758228 | 96.142  |
| 2     | 12.847    | 592161   | 3.858   |
| Total |           | 15350389 | 100.000 |

# $^1\text{H}$ NMR of **8f**, 500 MHz, $\text{CDCl}_3$

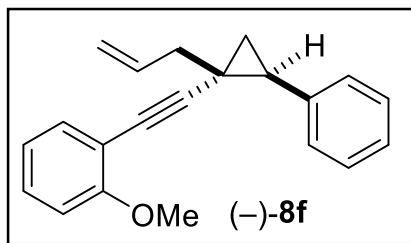

● Minor diastereomer

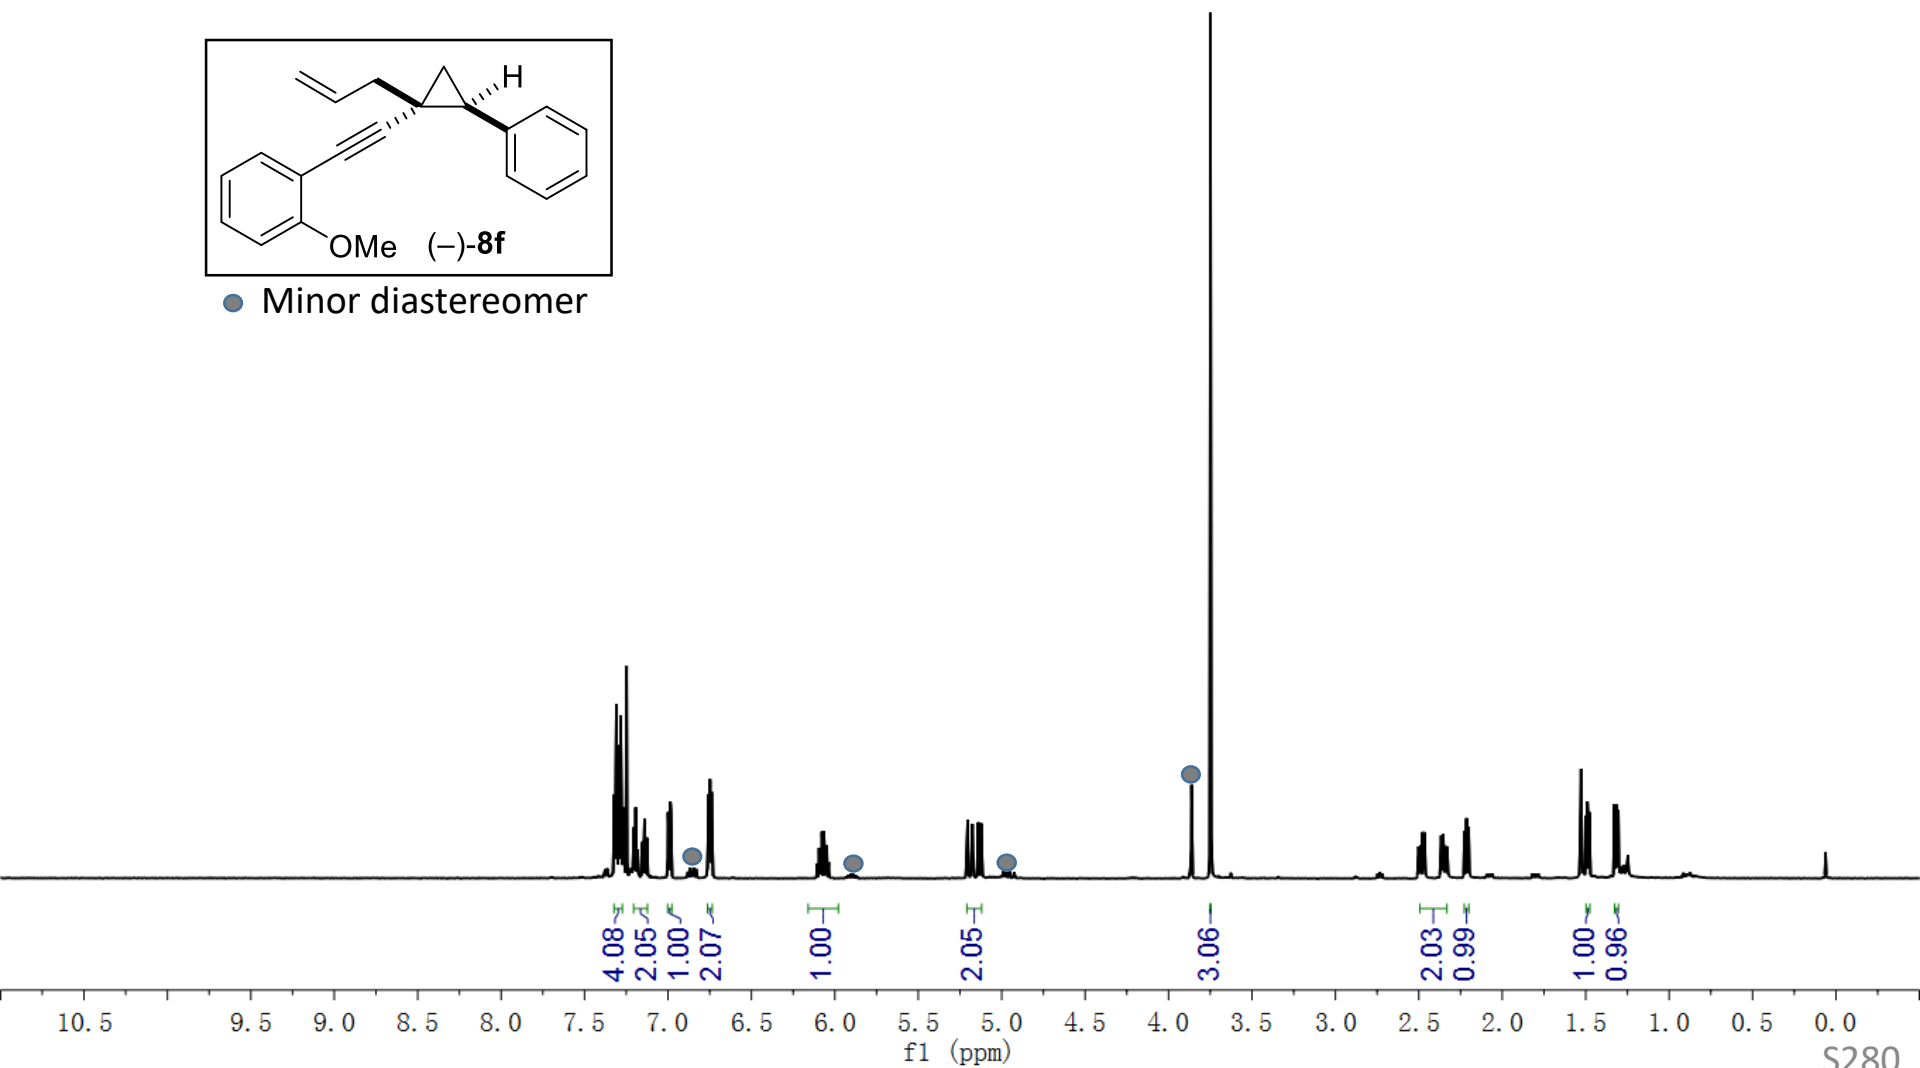



# $^{13}\text{C}$ NMR of **8f**, 126 MHz, $\text{CDCl}_3$

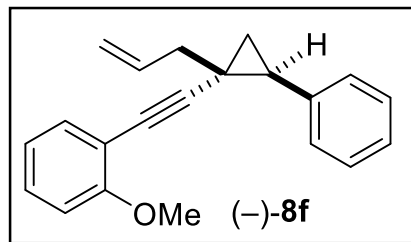

● Minor diastereomer

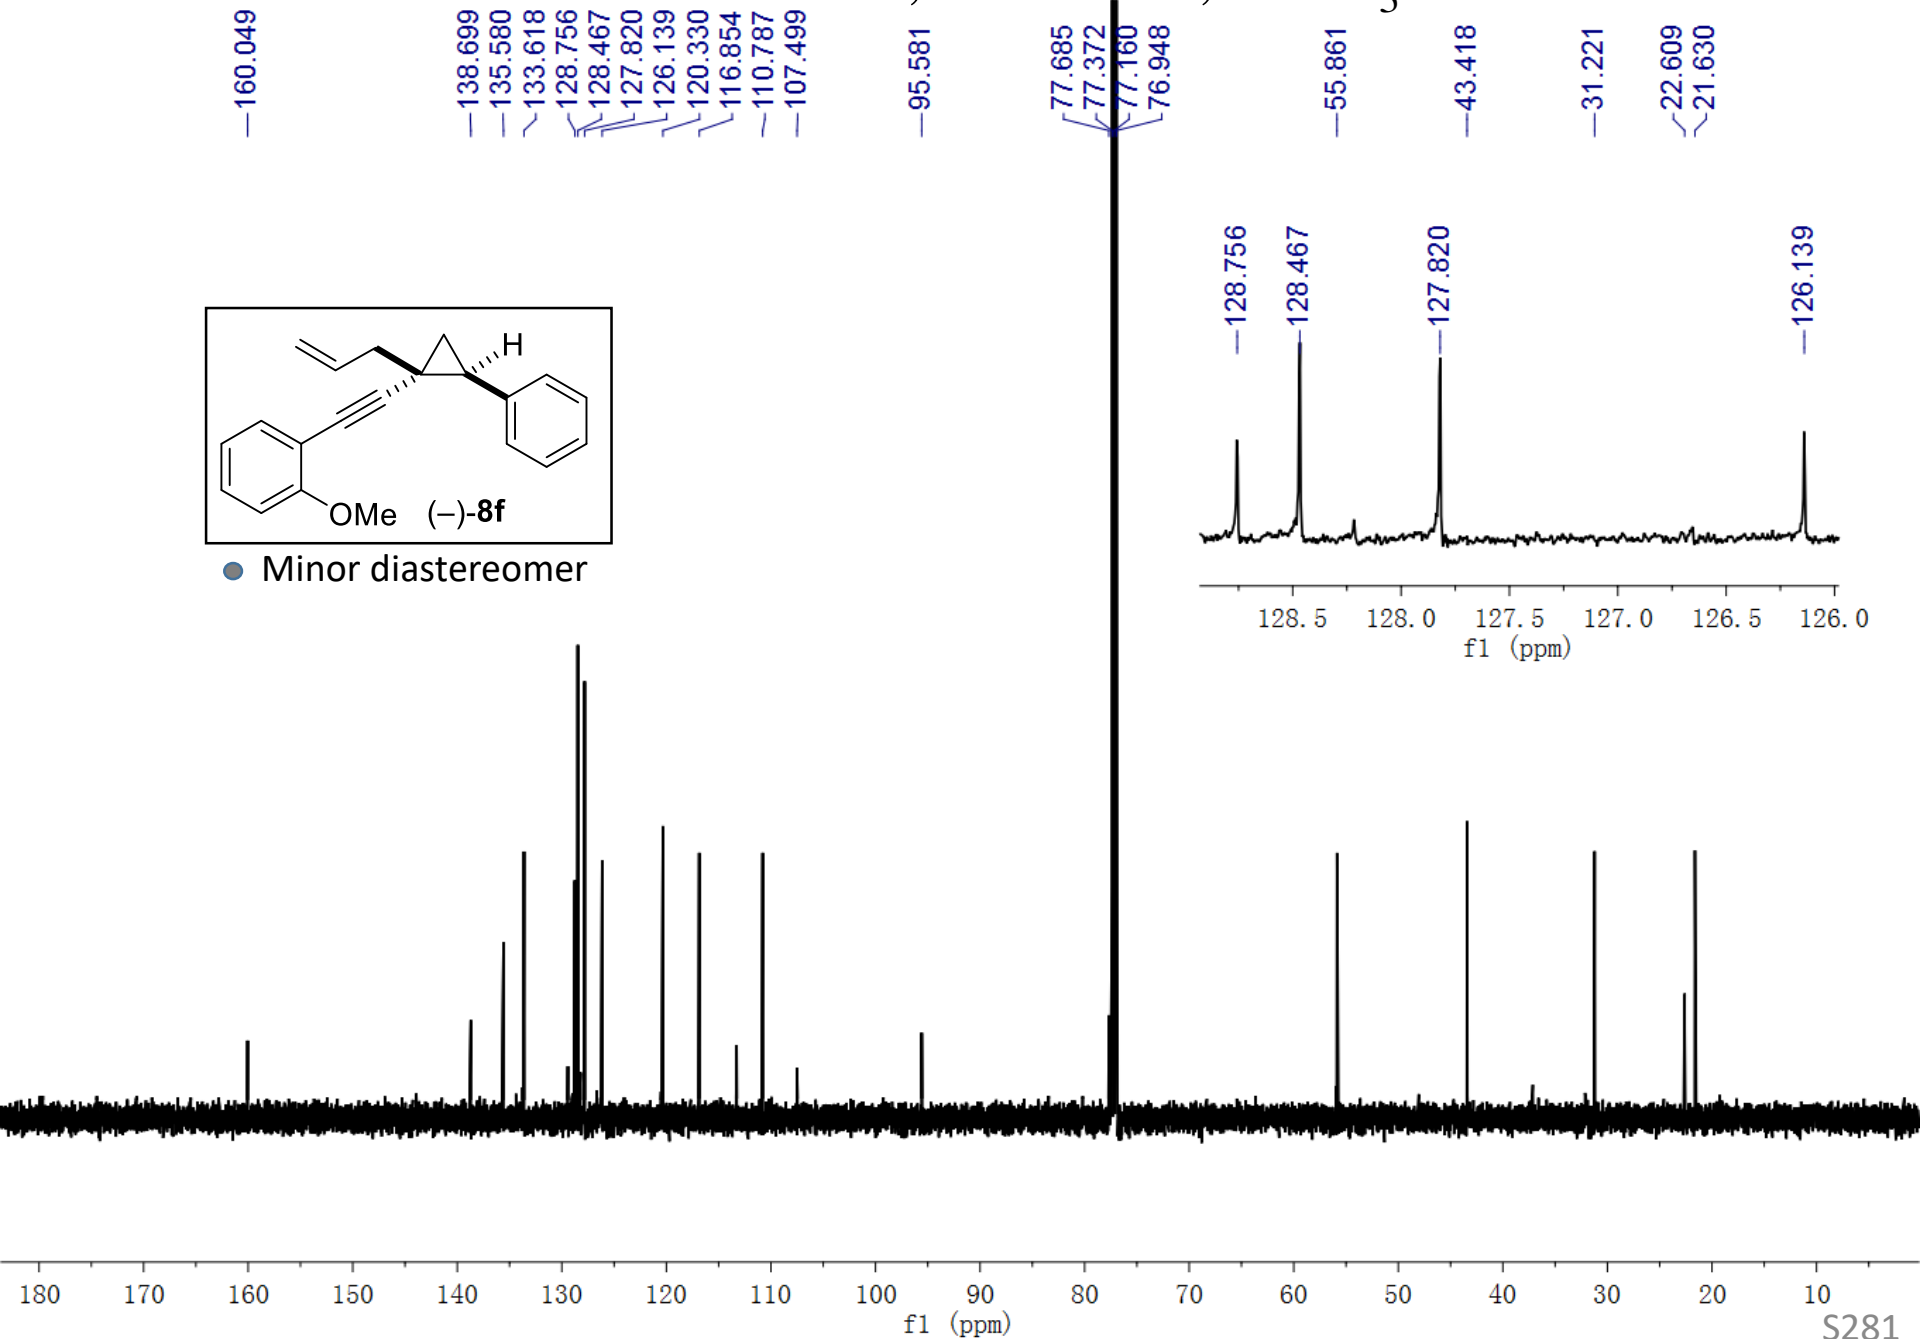

Data File : JOK-1549-IB--0.2%-0.5ML-2.lcd  
 Sample Name : JOK-1549-IB--0.2%-0.5ML-2  
 Sample ID : JOK-1549-IB--0.2%-0.5ML-2  
 Method File : JOK-0.2%-40min-0.5ml.1cm

Chromatogram

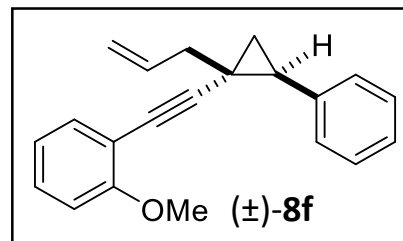

AU

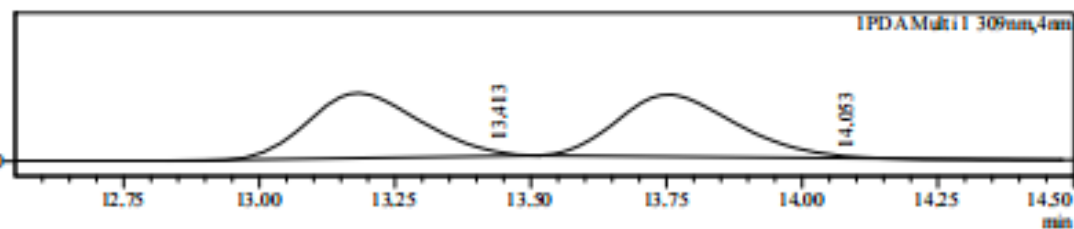

UV Spectrum

Retention time = 13.413

mAU

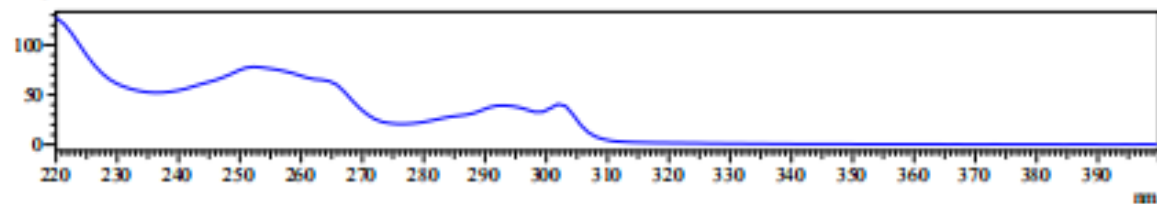

UV Spectrum

Retention time = 14.053

mAU

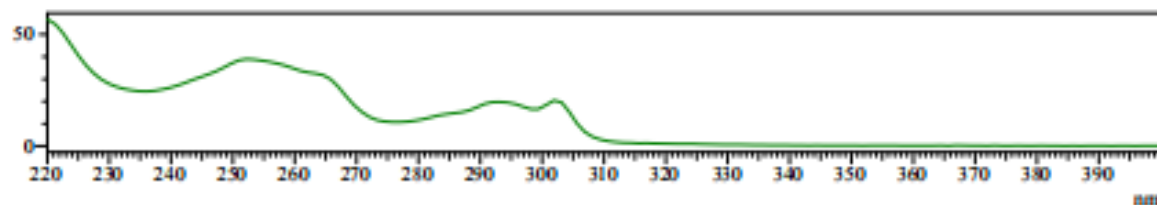

Peak Table

PDA Ch1 309nm

| Peak# | Ret. Time | Area    | Area%   |
|-------|-----------|---------|---------|
| 1     | 13.413    | 631887  | 49.937  |
| 2     | 14.053    | 633470  | 50.063  |
| Total |           | 1265357 | 100.000 |

Data File : JOK-1560-IB-0.2%-0.5ML-3.Jed  
 Sample Name : JOK-1560-IB-0.2%-0.5ML-3  
 Sample ID : JOK-1560-IB-0.2%-0.5ML-3  
 Method File : JOK-0.2%-40min-0.5ml.lcm  
 Chromatogram

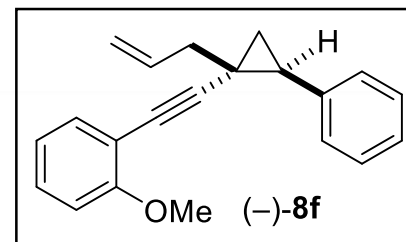

AU

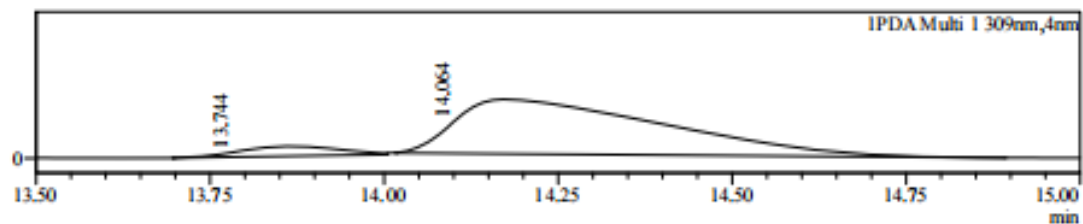

UV Spectrum  
 Retention time = 13.744

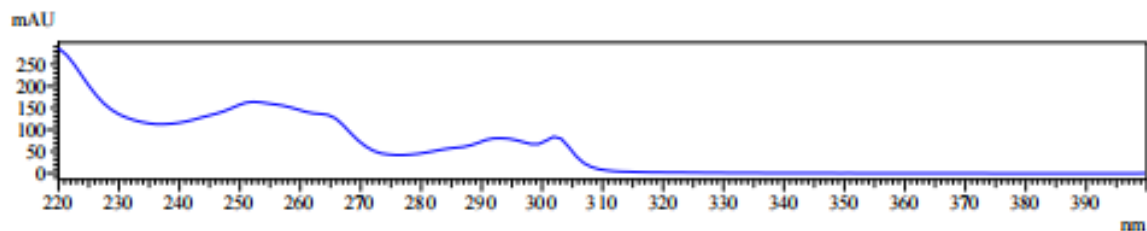

UV Spectrum  
 Retention time = 14.064

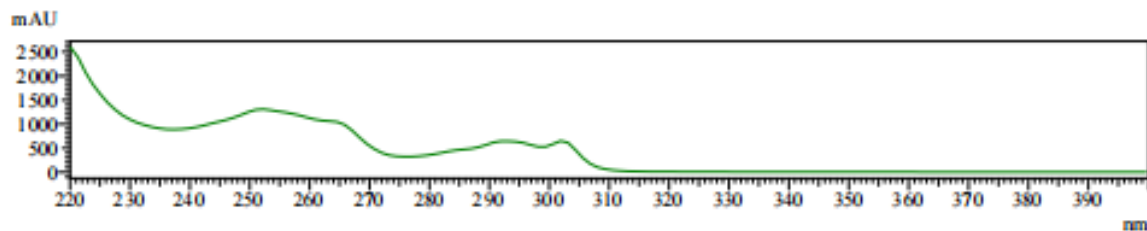

Peak Table

PDA Ch1 309nm

| Peak# | Ret. Time | Area    | Area%   |
|-------|-----------|---------|---------|
| 1     | 13.744    | 673967  | 8.053   |
| 2     | 14.064    | 7695259 | 91.947  |
| Total |           | 8369226 | 100.000 |

# $^1\text{H}$ NMR of **9f**, 600 MHz, $\text{CDCl}_3$

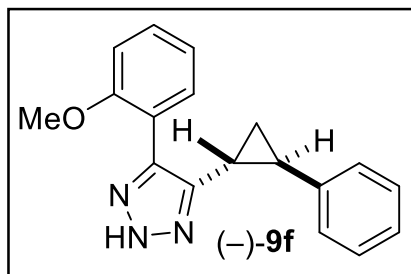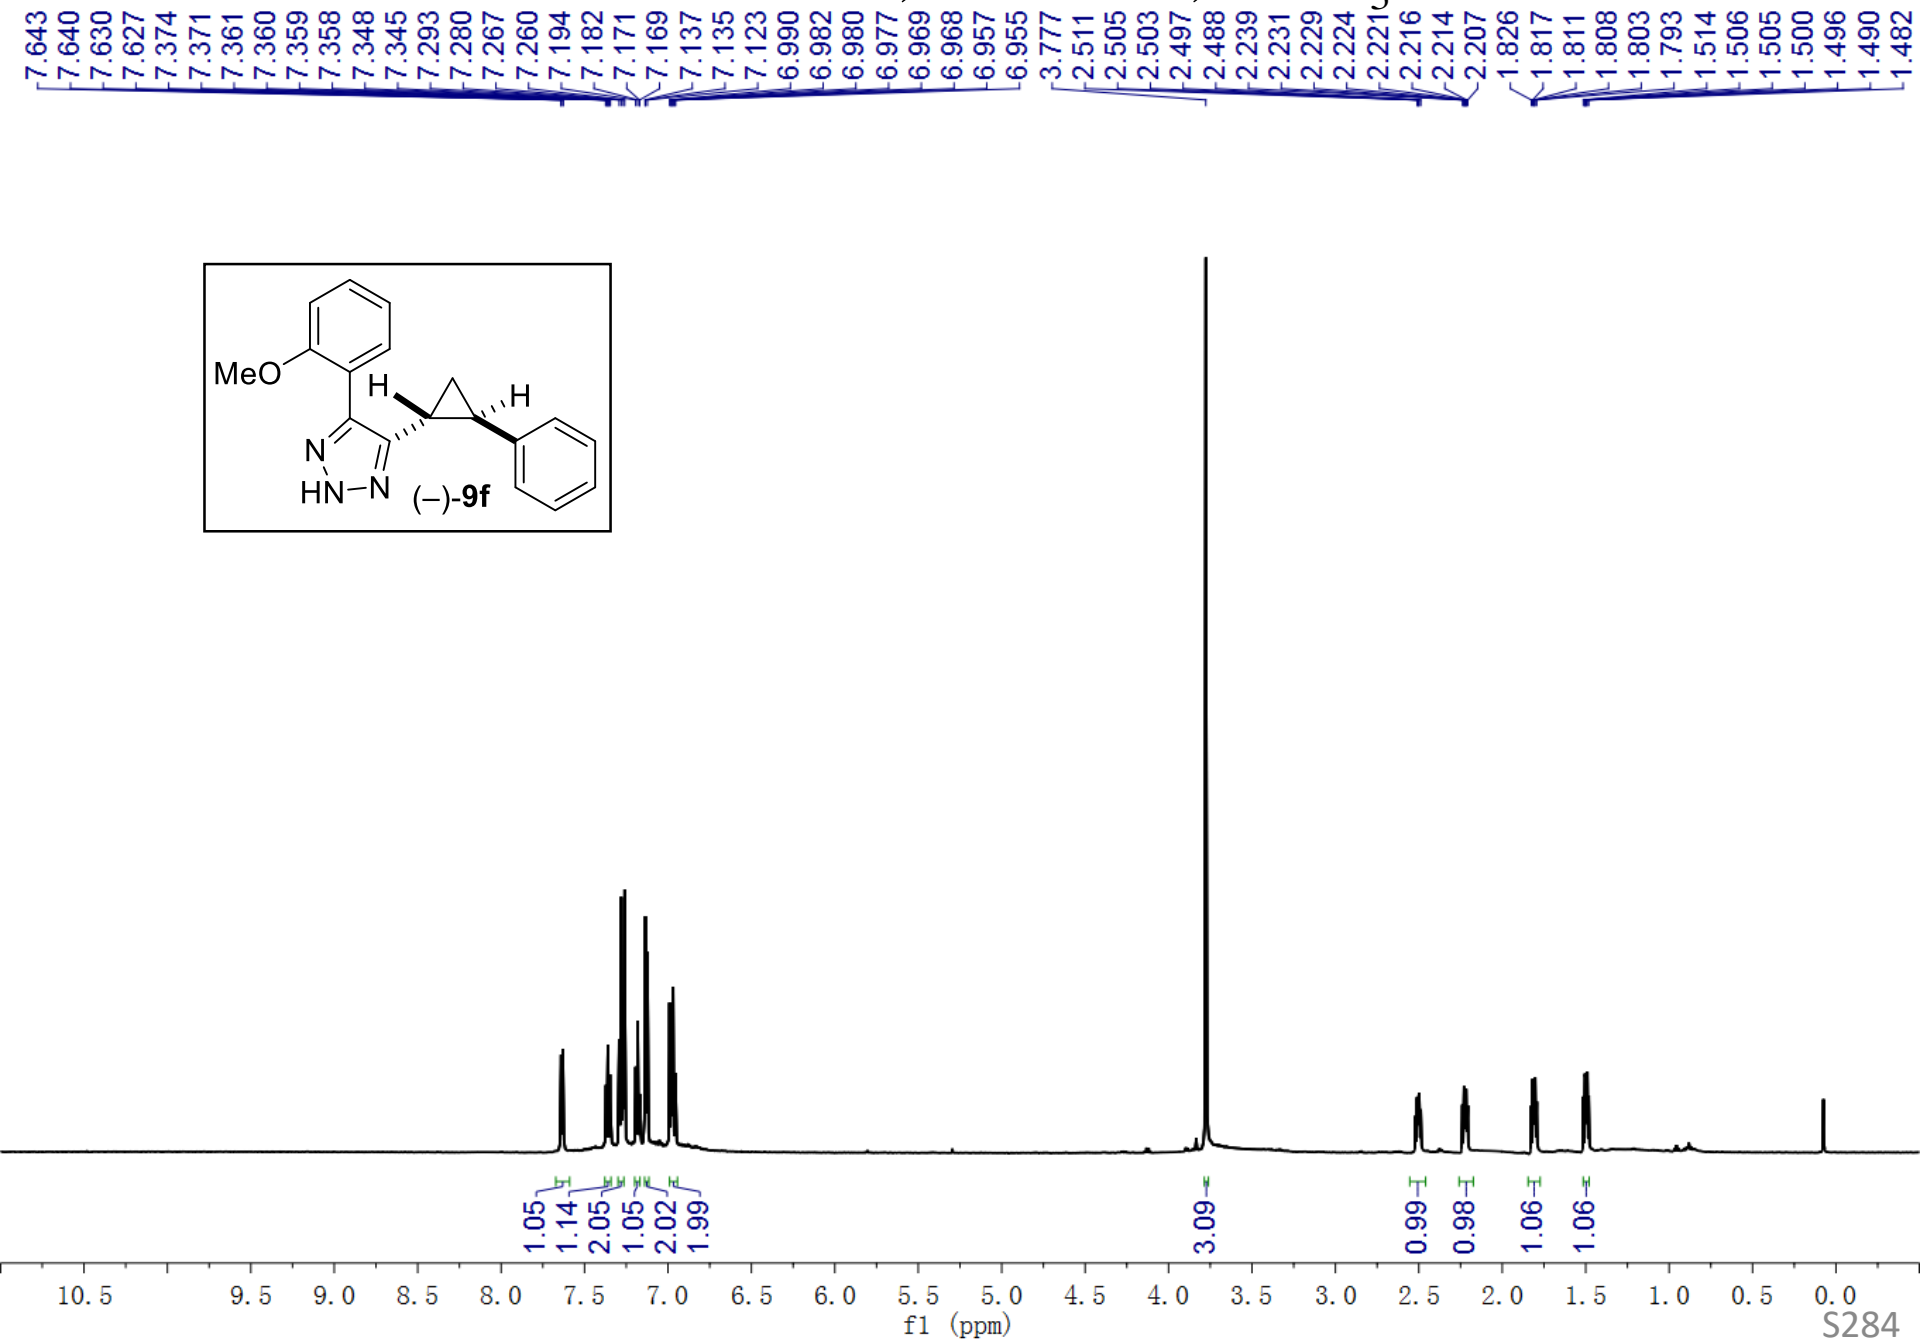

$^{13}\text{C}$  NMR of **9f**, 151 MHz,  $\text{CDCl}_3$

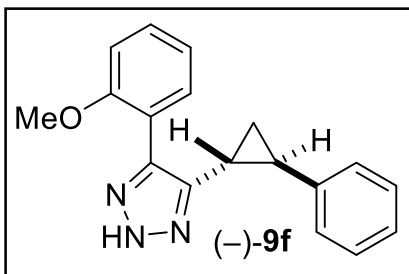

156.417  
144.672  
142.081  
130.316  
130.036  
129.974  
128.506  
125.991  
125.917  
121.251  
116.956  
111.392

77.371  
77.168  
76.948

55.705

26.326

19.589

17.496

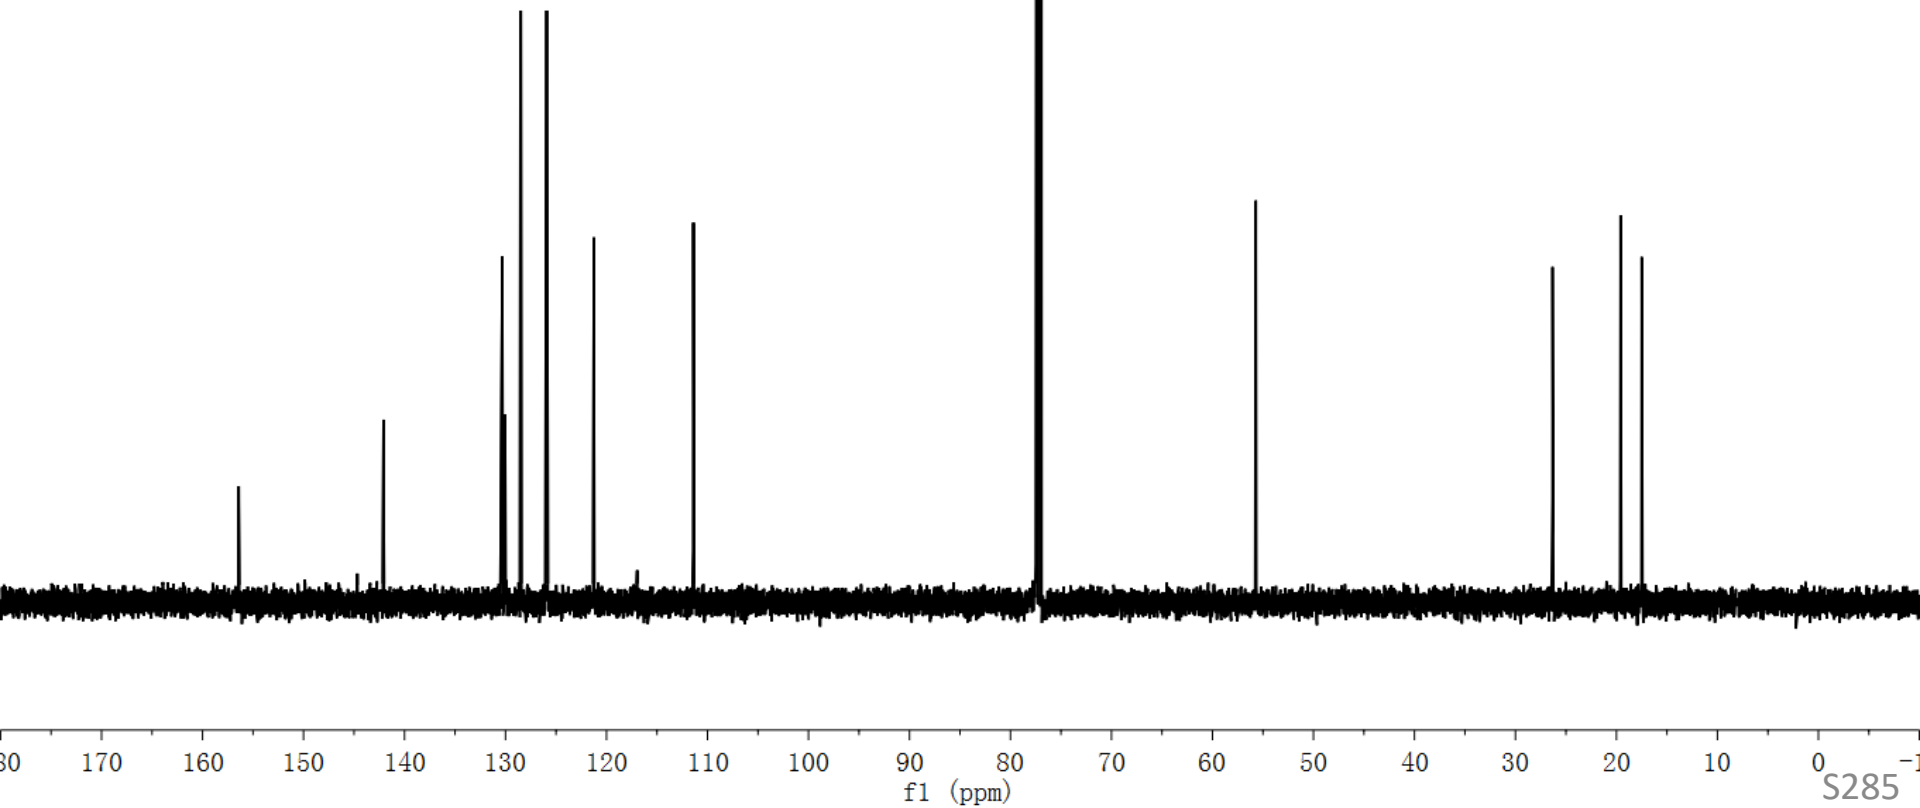

Data File : JOK-1852--IB-15%-1ML-3.lcd  
 Sample Name : JOK-1852--IB-15%-1ML-3  
 Sample ID : JOK-1852--IB-15%-1ML-3  
 Method File : JOK-15%--40min-1ml.lcm

Chromatogram

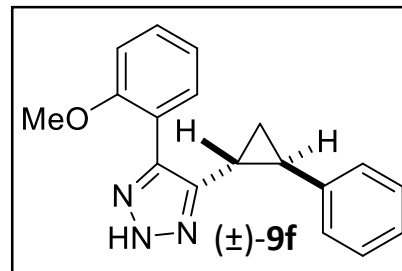

AU

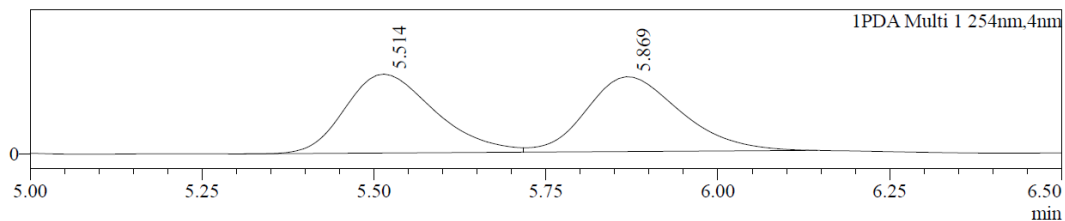

UV Spectrum  
 Retention time = 5.514

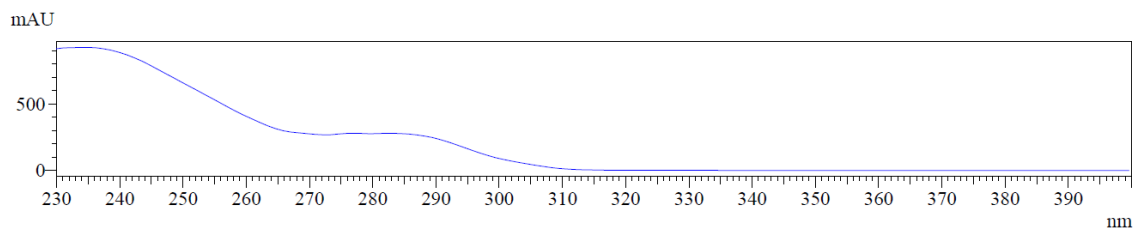

UV Spectrum  
 Retention time = 5.869

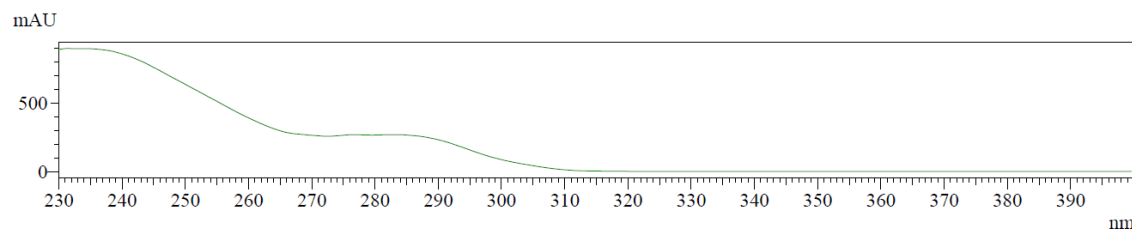

Peak Table

PDA Ch1 254nm

| Peak# | Ret. Time | Area    | Area%   |
|-------|-----------|---------|---------|
| 1     | 5.514     | 4977612 | 50.153  |
| 2     | 5.869     | 4947185 | 49.847  |
| Total |           | 9924797 | 100.000 |

Data File : JOK-1853--IB-15%-1ML.lcd  
 Sample Name : JOK-1853--IB-15%-1ML  
 Sample ID : JOK-1853--IB-15%-1ML  
 Method File : JOK-15%--40min-1ml.lcm

Chromatogram

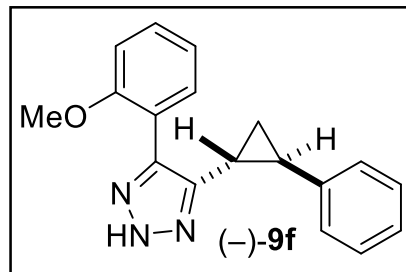

AU

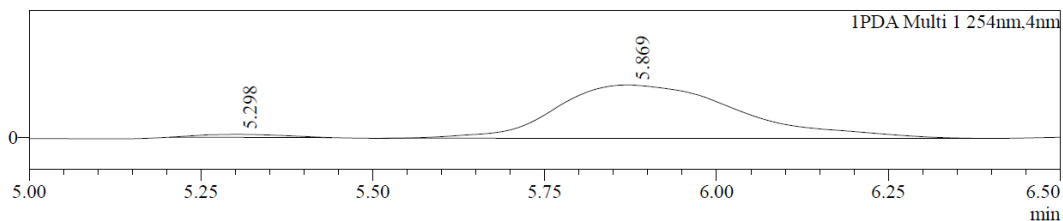

UV Spectrum  
 Retention time = 5.298

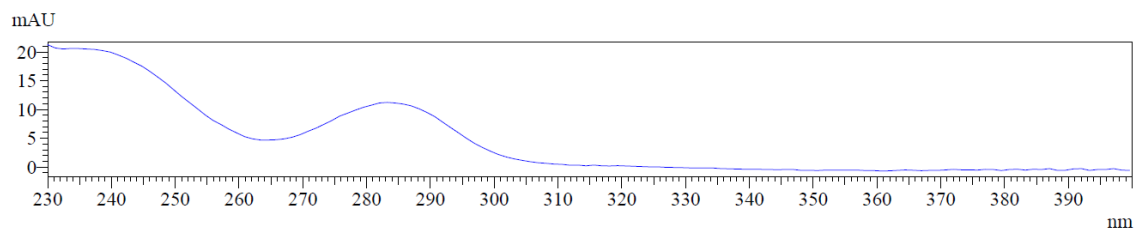

UV Spectrum  
 Retention time = 5.869

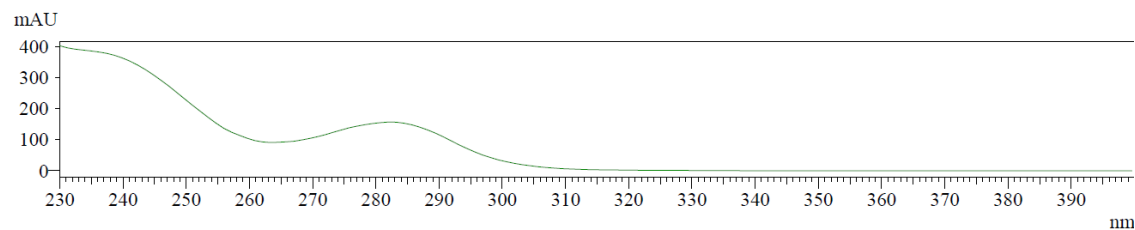

Peak Table

PDA Ch1 254nm

| Peak# | Ret. Time | Area    | Area%   |
|-------|-----------|---------|---------|
| 1     | 5.298     | 80413   | 2.527   |
| 2     | 5.869     | 3101211 | 97.473  |
| Total |           | 3181624 | 100.000 |

# $^1\text{H}$ NMR of **4a**, 600 MHz, $\text{CDCl}_3$

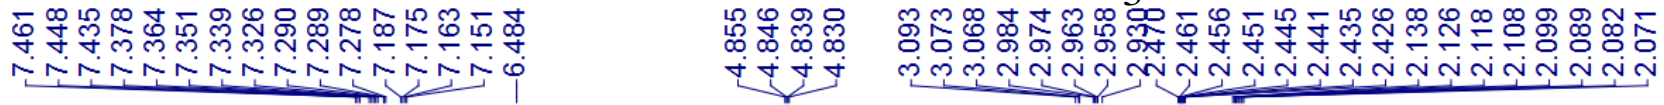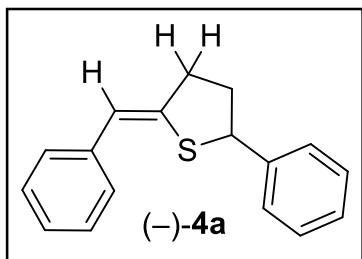

● Minor diastereomer

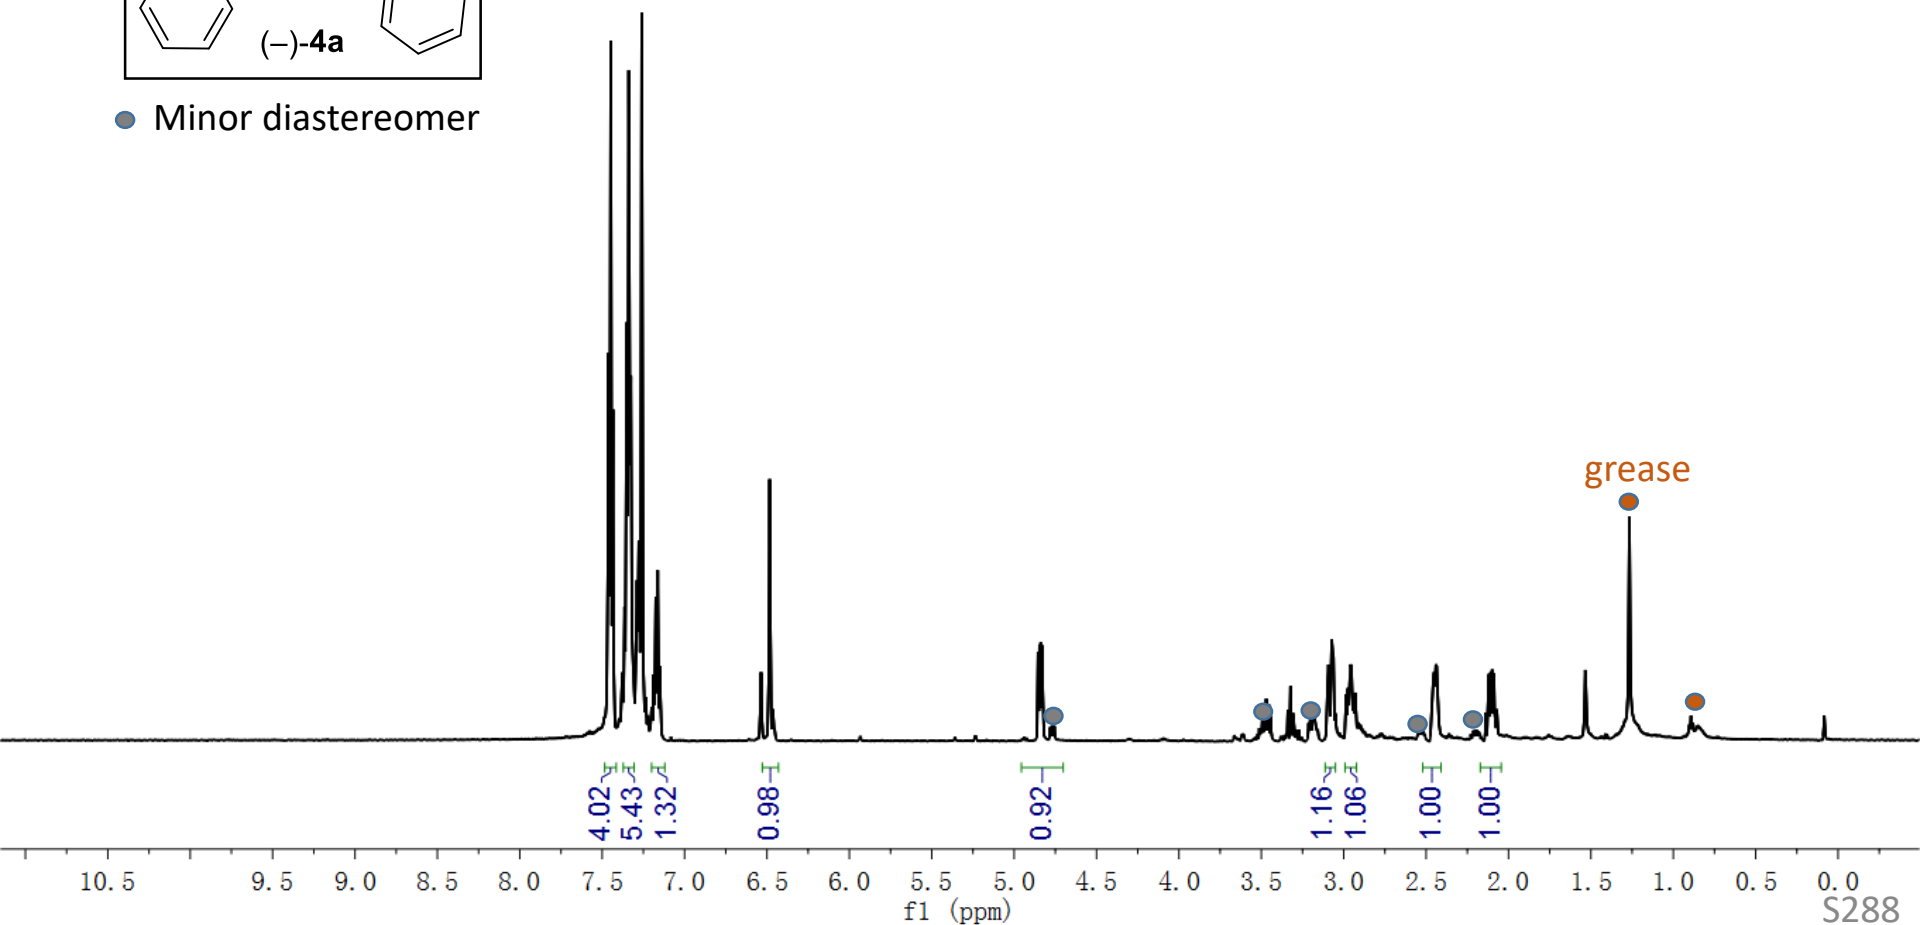



$^{13}\text{C}$  NMR of **4a**, 151 MHz,  $\text{CDCl}_3$

143.164  
140.693  
137.731

128.722  
128.441  
127.890  
127.843  
127.878

77.371  
77.160  
76.948

56.381

46.869  
46.736  
40.439  
37.617

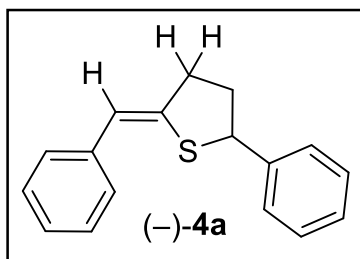

● Minor diastereomer

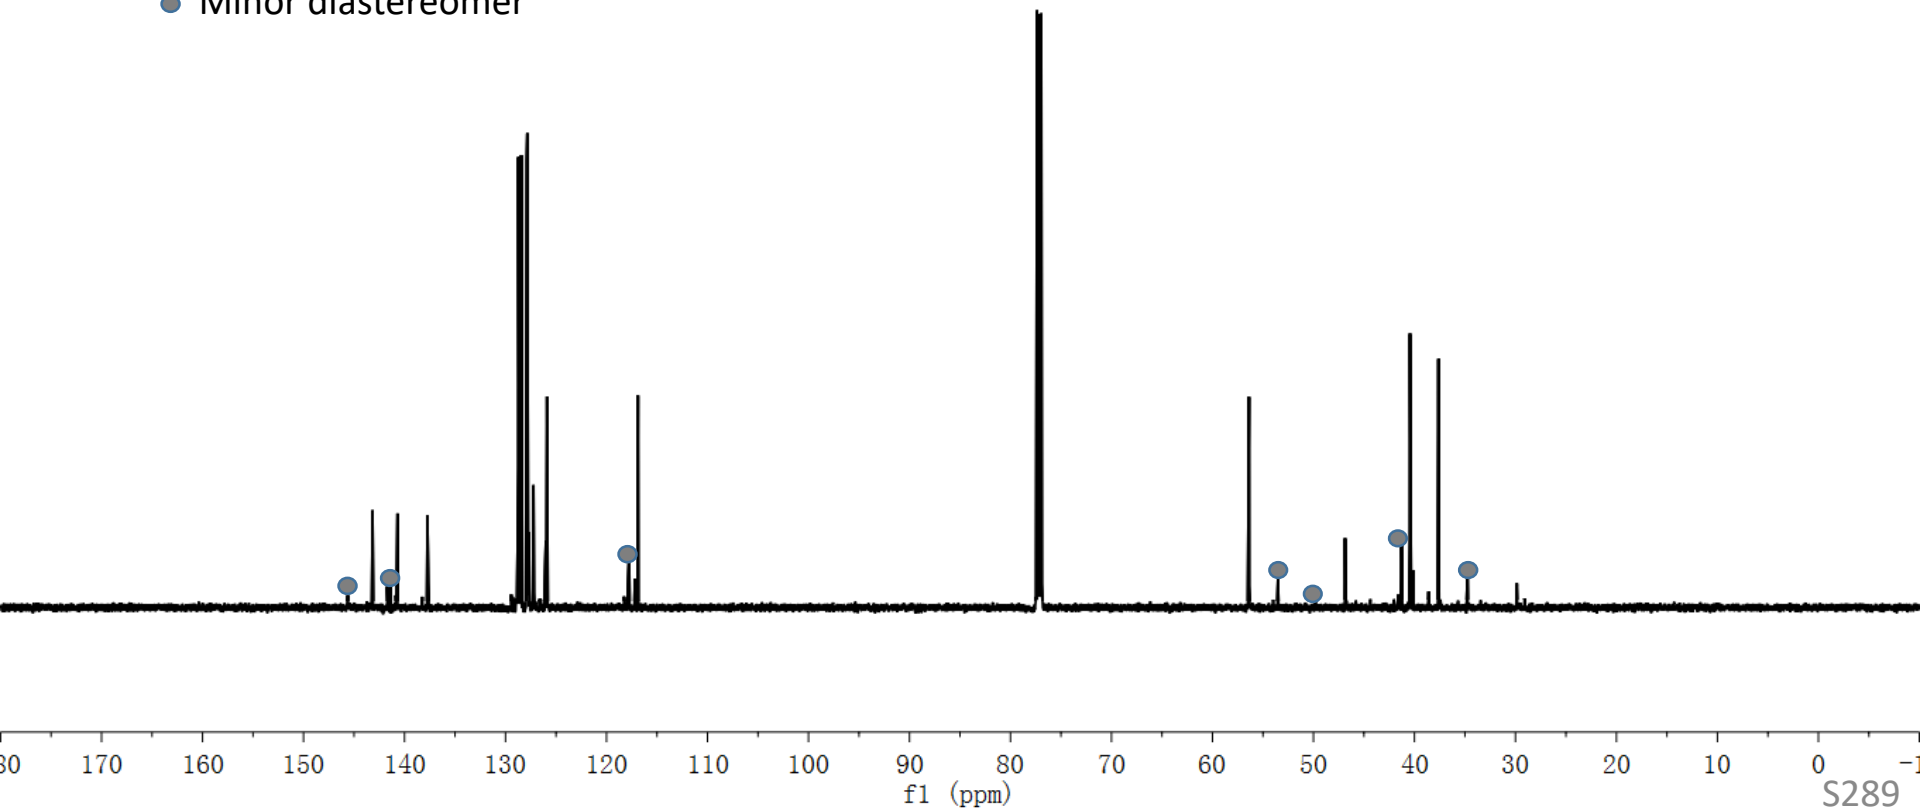

# ==== Shimadzu LabSolutions Analysis Report ====

WCL1848-ID-0.1%0.8mL  
WCL-0.1%-30min0.8mL.lcm

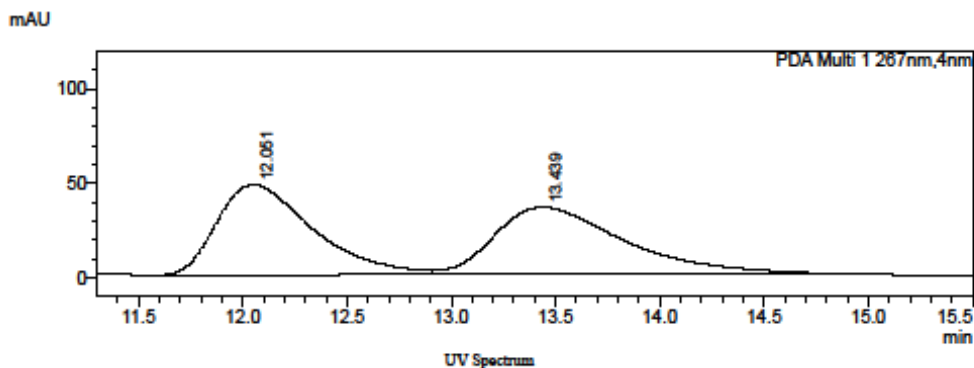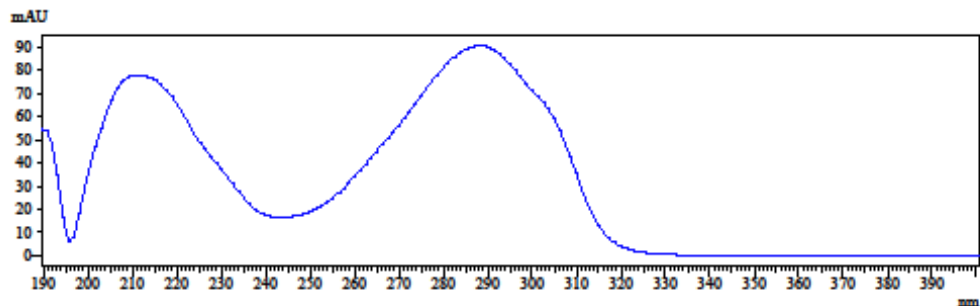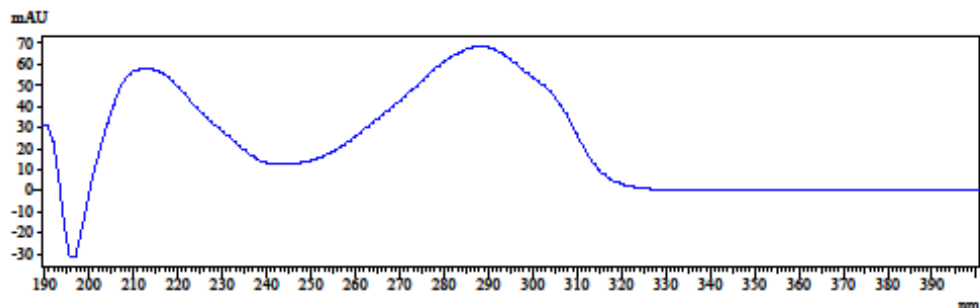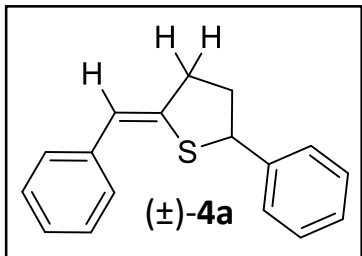

Peak Table  
PDA Ch1 267nm

| Peak# | Ret. Time | Area%   |
|-------|-----------|---------|
| 1     | 12.051    | 49.191  |
| 2     | 13.439    | 50.809  |
| Total |           | 100.000 |

# ==== Shimadzu LabSolutions Analysis Report ====

WCL1851-ID-0.1%0.8mL  
WCL-0.1%-30min0.8mL.lcm

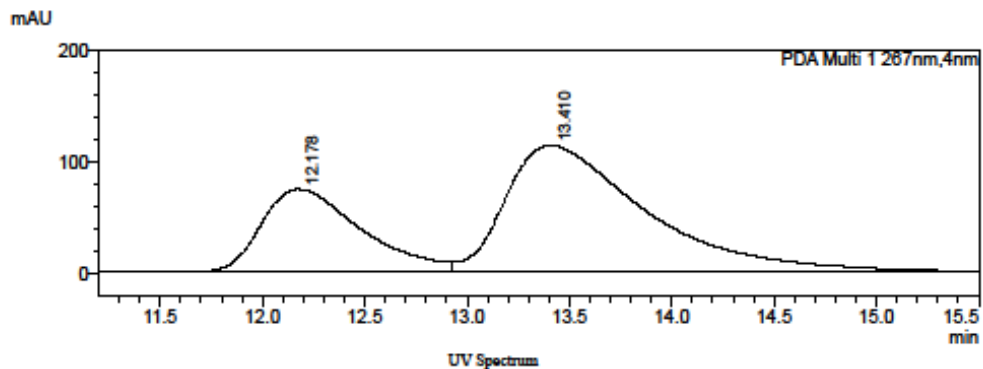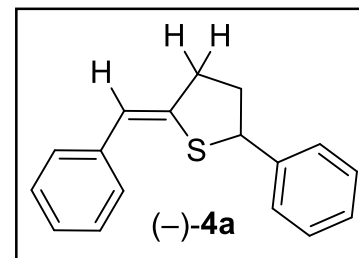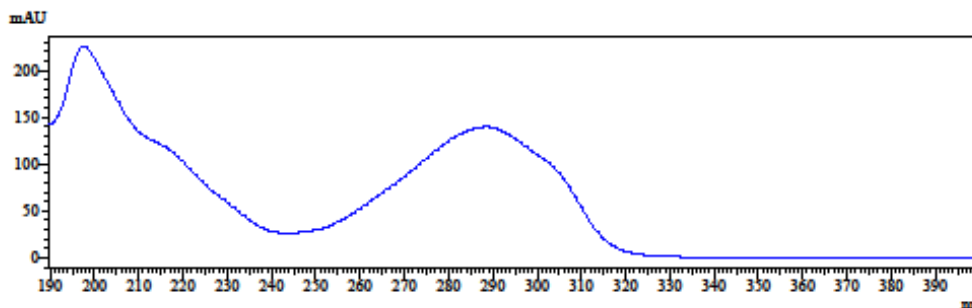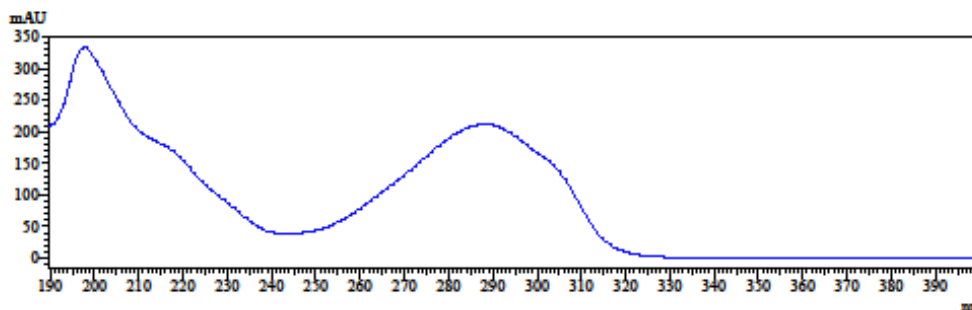

Peak Table

PDA Ch1 267nm

| Peak# | Ret. Time | Area%   |
|-------|-----------|---------|
| 1     | 12.178    | 31.810  |
| 2     | 13.410    | 68.190  |
| Total |           | 100.000 |
